# Supplementary material for: Genome-Wide Identification and Transcriptional Analysis of the MYB Gene Family in Pearl Millet (Pennisetum glaucum)
Source: Int J Mol Sci. 2023 Jan 27;24(3):2484. doi: 10.3390/ijms24032484 (PMC9916650; doi:10.3390/ijms24032484)
Supplement: Supplementary file 1 [file ijms-24-02484-s001.zip]

Archive with 12 entries (12 files):
- File S1. Amino acid sequences of 208 PgMYB proteins.txt
- File S2. CDS of 208 PgMYB genes.txt
- File S3. Promoter sequences of 208 PgMYB genes.txt
- Supplemental figures.pdf
- Table S1. Summary of MYB familiy identification in monocotyledonous and dicotyledonous plants 20221128.xlsx
- Table S2. Characterization of pearl millet MYB family members.xlsx
- Table S3. The Ka_Ks ratios for orthologous PgMYB genes between Pennisetum glaucum and Brachypodium distachyon.xlsx
- Table S4. The Ka_Ks ratios for orthologous PgMYB genes between Pennisetum glaucum and Oryza sativa.xlsx
- Table S5. The Ka_Ks ratios for orthologous PgMYB genes between Pennisetum glaucum and Arabidopsis thaliana.xlsx
- Table S6. The Ka_Ks ratios for orthologous PgMYB genes between Pennisetum glaucum and Setaria italica.xlsx
- Table S7. Promoter analysis of PgMYB genes.xlsx
- Table S8. The primers used in RT-qPCR analysis.xlsx
