# Supplementary material for: Genome-Wide Identification and Transcriptional Analysis of the MYB Gene Family in Pearl Millet (Pennisetum glaucum)
Source: Int J Mol Sci. 2023 Jan 27;24(3):2484. doi: 10.3390/ijms24032484 (PMC9916650; doi:10.3390/ijms24032484)
Supplement: Supplementary file 1 [file ijms-24-02484-s001.zip › File S1. Amino acid sequences of 208 PgMYB proteins.txt]

>Pgl_GLEAN_10012352 PgMYB1
MVTVREEMRKGPWTEQEDMQLVCTVRLFGDRRWDFIAQVSGLNRTGKSCR
LRWVNYLHPGLKHGRMSPQEEHLIVELHARWGNRWSRIARRLPGRTDNEI
KNYWRTHMRKKAQERKMSISPSSSSSSLTYQSCLLDTSPIIGMGSGDTHN
GSSCITSALGSTQSSMDAYPMDQIWREIEAPQAPALLSIAEGKEKTCSSI
PCPLPSPAMWDYKCPEIFWKMEDEEIMMLAPSFGNGK
>Pgl_GLEAN_10025141 PgMYB2
MEMLMQPPQRAAGISGGGGGGGGGDAEAEAEAEAAELRRGPWTVDEDLTL
INYIAEHGEGRWNALARAAGLKRTGKSCRLRWLNYLRPDVKRGDFTADEQ
LLILDLHSRWGNRWSKIAAQLPGRTDNEIKNYWRTRVQKHAKQLNCDVNS
ARFKDAMRFLWMPRLAERAAAQQQHQHQQPAPADVYSSLTTTAMPPEEQQ
QQDQDQDQEFWSTASALQHLTTGADHHHHQQQLFQFHDLPPLQDLTGWVQ
GFSEVVGVSPAETTTATATATTQLWSLDDIWRMQ
>Pgl_GLEAN_10019982 PgMYB3
MGRPPCCDNGVGVKKGPWTPEEDIVLVSYIQQHGPGNWRSVPENTGLMRC
SKSCRLRWTNYLRPGIKRGNFTPHEEGIIIHLQALLGNKWAAIASYLPQR
TDNDIKNYWNTHLKKKVKRLQQPAADSFQTPPSNGVTSPNYYSPPSSSHH
NLQGMQPTMNTYPSSTTCTSAQSNNSEAATAVSNLFQAWTMRPSPVATTA
NCKITMQDFQEEHDAAASMVCKDDQVVMTGDVSKSSALEMVVTPAVMGAS
TTATFSLLEDWLLEDMPGQAMDGLMGISGGCCADPIMF
>Pgl_GLEAN_10034693 PgMYB4
MGRPPCCEKTGVKKGPWTPEEDLVLVSYVQDNGPGNWRAVPTNTGLMRCS
KSCRLRWTNYLRPGIKRGNFSVQEEKLIIHLQALLGNRWAAIASYLPERT
DNDIKNYWNTHLKKKLSKAGGAAGDGSGGAAQEAKSGRAPTSPSPSPSLA
ASPAARGVLLGPVLLRCRLPRKGNFRRRPDSSLLPALLALDWSRLVKPPP
RPQRGGTVRHRGRRDASEARDRSMGMSGRPPQHGSRQLAAGTSRHQATTR
RQWWRDTIEWAWAPFVARQQPPQACSKDDGTAVSRRPAAARPPGRRSHFG
RFLTSCRQIDLAGRGEAPS
>Pgl_GLEAN_10034708 PgMYB5
MPCSSPAWLLRVASSAAAAAXXXXXXXXXXXXXXXXXXXXXXXXXXXXXX
XXXXXXXXXXXXXXXXXXXHWRPAEDAKLRELVALYGPQNWNLIAEKLDG
RSGKSCRLRWFNQLDPRISKRPFSDEEEERLMAAHRFYGNKWAMIARLFP
GRTDNAVKNHWHVIMARKYREQSTAYRRRKLNQAVQRKLEAVAVAMPPAA
GPGAGDAXXXXXXXXXXXXTPRTASPTPTASASATTAASRSHQAPRRPRT
TCCRRRRLPSACSPVSLRAPPLTLTPN
>Pgl_GLEAN_10034717 PgMYB6
MGRSPCCEKIGLKKGPWTPEEDQKLLAYIEEHGHGSWRALPAKAGLQRCG
KSCRLRWTNYLRPDIKRGKFSLQEEQTIIQLHALLGNRWSAIATHLPKRT
DNEIKNYWNTHLKKRLAKMGIDPVTHKSMSGTLTGTADDKSAKAAASLSH
MAQWESARLEAEARLARESKMRTPAPTPIALHGQQTNVPASTASSHLDVL
HAWQGAKIDLESPTSTLTFTGSNSGMLPTPRTNRLEVSESNSVMWQRSDE
LEGEESDWPFFSKHQVLELEGKEREEDFTGCEEAWFSGMAGFTGMLLDGS
NEHDASECWGESSNGQTEHSNQPSDEEDKNYWNGVLGMVNSELSAQSPPS
PLV
>Pgl_GLEAN_10031720 PgMYB7
MGRQPCCEKVGLKKGPWTAEEDQKLVSFILGNGQCCWRAVPKLAGLLRCG
KSCRLRWTNYLRPDLKRGLLSDAEEKLVIDLHAQLGNRWSKIASQLPGRT
DNEIKNHWNTHIKKKLKKMGIDPLTHKPLPPPQEHQQSPPPAAGVSPEAD
QPPPPPPLERNNPAEEKVATTATASSSEHGDDEVLLRKSPGFCTDEVPMM
HPDEIMVPLMSDHHPPPLPALTYGPTAAATAAAVSTPTTSYSTSGSSSSL
TRDVESPFAFMDMGFQEFVFQTGLDDDMLNDARWLLPPPLSPSPAFEDFD
SYHQSQRNGALFSSY
>Pgl_GLEAN_10020657 PgMYB8
MFNNEWSDTNISMVKSLIASQVANNSFANDTNNTHKAIMKELQAWFPQKE
KGKLIELYVELLVEMMLPVQSGNHSIVATNNLANDNFGIPMEDPPMKNMD
MLLACYLTNKMPKATGMVKEAPQRRVITLRQEKQHKEGPWTMEEHMQFLC
GLEVHGRGNWKNICKDFVTTRTPTQISSHAQKYFLKMKNKSEKKRYTIND
VGLYDDEPWVHNDSSNRDVDNPLMFGGAYNNPNCYGYGN
>Pgl_GLEAN_10004174 PgMYB9
MDPKFNDEWSASGIRMVKSLIASHGANNNYANNTNKTHKAIMNKLQAWFP
QKEKNQLIELYVELLVEMLLPAESVVAVNNLMNDNFGIPMEDPPMKNMDM
LLASYVTDKTPEAMGMVDEAPHQRRVLIARQEKQHNEGSWTIEEHCQFLC
GLQKYGRGNWKKICRDFVTTRTPTQISSHAQKYFLKMRHTSEKKRYTIND
VGLYDTEPWVQNNSFISGDNPITFGGAYNTNCYGPGNHTAPINNVAPVSS
PFLYSASQASSSQVNTLAGQQVGASSSPALALEGPGSHMDLTGNQQGDFL
PEQWVDIDNMY
>Pgl_GLEAN_10004173 PgMYB10
MDPKLIGEWSASDIRMVKSLIATHVANNNYANDASKTHNAIVNELQAWFT
QKEKSQSSANPSIVAISNLVNEISEISMVDPPTKDMDMLLASYLTDKMPE
AMGMVEEAPQRQATILRHERQHNEGPWTQEEHMQFLYGLHAYGRGNWKKI
CRDFVTTRTPAQVSSHAQKYFIRMERTSEKIRYSINDVGLYGAEPWAQNY
SLSQDPLSFAGGVYNSNCYGSSNQLGPMNNVAPVWSSPFWYSADQASSSQ
VNTWSGQQVGASSSPALAQEGIASQISPTGNQQGNFLPDQWIDIDDMFY
>Pgl_GLEAN_10018773 PgMYB11
MGRSPCCEKAHTNKGAWTKEEDERLVAYIRAHGEGCWRSLPKAAGLLRCG
KSCRLRWMNYLRPDLKRGNFTDDEDELIIRLHALLGNK
>Pgl_GLEAN_10001056 PgMYB12
MAIQIGEERSMFREPVARKFGATRRSLHQELTSRALPTMDLNVSAEHQTT
AWTEKEEEVIVALHKKHGNKWAKMAKRIPGRPENSIKNHWNATKRWLVAK
CRRKTIETAAVRKATVSKVLENYIRELLDSGKLKVEGAPASTAADPPVLD
LDDDDDDDAAASDSWQVDENPAVTEPSPGSNSSPDDQWWLHMLCGGSVPP
PVMEAPEPMQDCVYATYDADGYVRYVHLQPTPGHSYAPVNQTAAAAAAGY
PLLLYPFGGQQVHGHATYPAGSYYQEAGPGNRYINNNGAGGDEARGDAGF
APAAAPGLAGMPFSANAPAGQNKRGDGAI
>Pgl_GLEAN_10027640 PgMYB13
MMESWMEVLPPPYFAGQAAGGRFLPDRRTPGPGAWTKEENKLFERALAGV
DWDAPDRWERVAAMLPGRMVPDIVAHFDDLENDVCFIEAGLVPFPQYGGG
VQNAGFTFDWDGDAGDLGFKRSCYMVAGKRGRGPEQERKKGIPWTEEEHK
LFLMGLKKYGRGDWRNISRNFVTTRTPTQVASHAQKYFIRLNSGGKDKRR
SSIHDITTVNLPDDGGGNLSPSPPSVLTSASTPRSTGGGPVISEQFGGVL
VDSKPTPPHHFMPHPYGNVKLEPGSSHHGGFMDDSVLMQMQCGQLQPLG
>Pgl_GLEAN_10025716 PgMYB14
MVAVKVEEPEGRSAGNWWNLGASSPSPSVSEAGSYGGGALMSLVESNPAD
SVSGRRRKSGPVRRAKAGWTLDEDETLRKAVDACNGKNWKKIAESFPDRT
SVQCLHRWQKVLNPELIKGPWTQEEDDIIINMVEKYGPKKWSLIARSLDG
RIGKQCRERWHNHLDPQINKEAWTVEEESVIVDAHRLHGNKWAEIAKLLP
GRTDNSIKNHWNSSLRKRLGDYNATRALPVSVHMGRNSFKHEEAKLTGGN
YIDLNKDLNINLERASEIVDHSEHATHLHACSLKNFKSCSDFLSLAMPTA
QPKKMCEVLGGGYSAAIALAGIQGLKMDSIHDKGAEINFVCKEHLENDPL
NVEVRKLDHATDTMKYSGSAKVEGKTVNNMCQLFLPNKSNSFGSLCYEIP
KLEDVVPSHSPVFSTHHIQQCCEDGFLPPVAYTTPCGDGEDISDQLSVES
ILKSAAENFPGTPSILRRRKREKTAHGEDSNVKSDSFHTPLGKCTTESPH
SFKTATFLSLGPPDNKGLSAVGSFDVSPPYRLRSKRMAILKTVEKKHLDF
SSDEMYTDTMEKYSSCKTECTNTYTDVSSKQEMKMTEHIVGMETLAKDFT
YTAKLGLI
>Pgl_GLEAN_10035698 PgMYB15
MEQHLFLRGGNAQGDSGLVLSTDAKPRLKWTPELHQRFVDAVNQLGGAEK
ATPKTVMRLMGIPGLTLYHLKSHLQKYRLSKNLQAQANVSASKNAIGCTN
IAERMPGTSAPTMSSTNATPQAEKTIQIGEALQMQIEVQRQLNEQLEVQR
HLQLRIEAQGKYLQAVLEQAQETLGKQSLGPANLEDAKIKISELVSQVSN
ECFSNAITDIKESSSVHRLEPKQIQFVESSTNNYFTAAEGFIKEHRPHHH
GVLKAYDDSSLFCRKGSHEHEIPLALNRSLSERRMAHLQNEKGYSKAELG
YESDTEMAPEYIGPQNNGGGSTTSSASGSKGDAEKPYLEEPNCTRQAVEY
PRESKLLDFEHSCPGKKLDLNTHNVDDTDQAYRHFDLNGFSWS
>Pgl_GLEAN_10013674 PgMYB16
MGRLSCSGGGGVQPKLRKGLWSPEEDEKLYNHIIRHGVGCWSSVPKLAGS
LQRCGKSCRLRWINYLRPDLKRGSFSQQEEDLILALHEILGNRSRRTCRG
GPTTRSRTSGTAASRRSSGSAASTRARTSRSPPLTDSFGGGFDAAGAALY
GHLVGGGKQQDSAGFVDYSSVLDVSENLGYGESSSNSSNWTCTEMGGAVL
DSEVMHWASSGCAATATKQEPYTELERLHSGGYGGGGQAADDDDDALEVK
FALPCGGQEQSLAHFDFNLEYF
>Pgl_GLEAN_10015908 PgMYB17
MGRAPCCDKASVKRGPWSPEEDEQLRSYVQRHGIGGNWIALPQKAGLNRC
GKSCRLRWLNYLRPDIKHGGYTEQEDQIIWSLYSSIGSRWSIIASKLPGR
TDNDVKNYWNTKLKKKAMXXXXXXXXXXXXXXXXXXXXXXXXXXXXXXXX
XXXXXXXXXXXXXXXXXXXXXXXXXXXXXXXXXXXXXXXXXXXXXXXXXX
XXXXXXXXXXXDAVAAAAATALDDVFLPDLVGAGEQLFPYGDFLFGGPQD
RAALEQLSACYFPNMAEMWGAAAAATSDAKPPQGLCNTLT
>Pgl_GLEAN_10011787 PgMYB18
MSGSRSSSPNSNSEWSRKENKMFEEALAYYGEGTPNLWDKVSSAMGGIKS
AEEVRLHYQDLVDDVKMIESGRVPYPKYKTQGFWTRG
>Pgl_GLEAN_10011796 PgMYB19
MQSAVDAVAGVEQVVVPEPAVRKGPWTVEEDHILVNYIAAHGEGAWNNLA
RAAGLNRTGKSCRLRWLNYLRPDVRRGNMTAEEQERIVQLQARWGNKWSR
IAKHLPGRTDNEVKNFWRTKIQHKNKKERSAIETIITVAGVCRGMAGRST
PAITEEDQGSSNYSGRTGVTQDYGIVTQQQQPSISSAADHHLGYNVHGGG
AGGAGALDFVPGENFWAIDDFWTTMQSYQGGT
>Pgl_GLEAN_10011958 PgMYB20
GGYLSDDGARGGAALRERKKGVPWSEEEHRLFLEGLEKLGRGDWRGISRG
FVTTRTPTQVASHAQKFFLRQSSAGKKSSAKRRSSLFDMVQNLESGRDVL
LATDHSSDCKADSTSNSLSPKAPRDDVHLKESKTAIHARTTTMRPSSEKA
SVSETVTVTTDQAHGYHCSPLNLELGMSLSTPSIGSQQFASNLISSG
>Pgl_GLEAN_10027871 PgMYB21
MARKCSSCGNNGHNSRTCSGHRGHENSISTSSNSSSNTGCGGLRLFGVQL
QVGSPTLKKCLSMECISPAAYYGVAAAAASSLSPSVSSSSSSLVSIEENS
ERVSSSYMSDGLMGRIQERKKGVPWTEEEHRMFLAGLEKLGKGDWRGISR
HFVTTRTPTQVASHAQKYFLRQNSLTQKRRRSSLFDAVEGAKKVAMPRIA
SVSGLPFFPSPSPRSVDDDARTHGAVMLPPFLNLMSSTSPFAAAAGGGAS
QSQHPPSLTNQMATPQAQQLQMPDLELKMSTSRLSDQPGPSRSTPYFGTV
RVT
>Pgl_GLEAN_10029419 PgMYB22
MGRHSCCYKQKLRKGLWSPEEDEKLMNHITKHGHGCWSSVPKLAGLQRCG
KSCRLRWINYLRPDLKRGAFSQEEEDLIIELHAVLGNRWSQIAAQLPGRT
DNEIKNLWNSCIKKKLRQKGIDPNTHKPLAEADCSGAAPTISTERTSGSS
DVNPSSTGALGNLNHLLSETAQSSMLLPVYDKNHPETPNLARPKVPPKEL
FLDQLTVGHESSSTCRSSGQTLYFPFQQPLGYSSESGSGDGASMNSLWFN
QNDFNCSTISTVMPPVSPSALSTSMGLNLPPDNPRHGGTGIGSASVDSFY
WDGTNPSSSSSTGSRGSNSLGFEPQSTSSILENSVFPWTDIGHEKDSRAH
LVEELKWPDLLHGTFAETTVAMQNQSQSLYDDVIKAESQFNMEGICASWY
QNQQPQQQLQAAPDMYDKDLQRMQLSFENI
>Pgl_GLEAN_10005876 PgMYB23
MGMGMGALDELEVLAMSPGGSASSAAAAGSEDEGDLRRGPWTVEEDLLLV
NYIAAHGEGRWNSLARSAGLKRTGKSCRLRWLNYLRPDVRRGNITAEEQL
LILELHSRWGNRWSKIAQHLPGRTDNEIKNYWRTRVQKHAKQLRCDVNSR
QFRDVGGEEDVFGGSWSELLAAAGSDGDSKIGLPDFELADFEDNLWSLED
LCLQQLC
>Pgl_GLEAN_10021026 PgMYB24
MAKSRKLFFFFPFSLRGAAGGRADQRVPAQEEPAYPCPCPGRPKGASART
SQALRIAFFRRFLAGGRWATDCCPAHAVSARSEGLGALALPKPAPPPLGT
GGGAYDRSYPDEPPLGYTPSRSDRYWAEDDGGGYKGFSRYGGGGGGRRDG
RDVRGSYRRSPFRGYGSDFSRNHPEQPPPPPPRRSPLRSVAVPICYDPPG
NRVDRGDRDNLPRVAPWRRRESRSEAVDAAGAGTLSLGQTTRTASSEKEA
SAQPPAPPGAEDEAPRKKARLGWGQAPEDKSCELTDTFTNPTKDVPEAAD
EAVNNEFSIKLDQLGDDPINSLANMLADLLQHDDSCSGDSKGPTCTSKLL
LLKESISKEIEKTELEIDLLEGELKSVNAEAGTAVEGSPTGVTYAENLSP
SSGTSKVPGSVEISRTSHVMKEPGELIPSPKLPVLQDADAKGADMMEIET
VPVRNAKTVSSEESAVSPGVAEGPVCAAAADLSPLKASEGAGSRNDMDND
RLETSSCHVADSIKTEVSDDLRVRQCSYHDHNSLLSSVTSANNDIARVMN
ESLFKSLPADTPHLDLLASSHLLSQRKDDHHIRERLGVCKNSLRLKEQIL
TLKFKAYRHLWKEDLRLLSAKKQRSKSNKRIDQSNRTSLVGGSQRQRSSN
RSRLAMPAGNLSTFSTPEMSDVACKLFSEFQIKRCRNYLKMPALIIDERE
KECLRFVSKNGLVDDPVLVEKERVMINPWTQEEKEIFMEMLAKFGKNFSK
ISSFLAHKTTADCVEFYYKHHKSDSFREVKKLLDCRQQQQPASNFLGAKS
GQKWNPEANAASLDMLGVASVVAAHGLEYANRVEKISAKSLIRTTHGPNV
SFAAKKSSDRECTDNVPLHERESVAADVLAGICGTLSPEGMGSCITSSAD
PGQKIRMTRMEHVLAPEIDRSIDDEDTLSDQECEVDPVDWNDDEKSIFIE
AMNNYGKDFARISSCVKSKSYEQCKVFFSKARKSLGLDLIHQGAPDVSMP
TSDTNGGRSDTDEACTAGMDSAICSTQSCSKIEKDVCPTEKAIGGIITMQ
SEINMKNGFDVIDVKTEVDEKKADKSCSVVDHGRFNEGTHQAACGTIDIN
CPESTEKLQEKDDVVDQVNAQNNIVTSSSPEQAMTVHPEVGSSLQSVEVL
HQTNKAPSGCGTDASRMEECSNHALDNKLRKAGNSGASACIASDISTKDN
VHLANMTDASTISPAFAPSYQHPVPVDMPPTKPKPLVTPLTPKDLMPVQF
SSAVPDPTAIRFDGIASITMPNFDDSGNRVSSALGAKDMSKYPAFKDPTG
NQHDTLFCNVDGYTNHLTTELPFFSERTASGTVSTSQTDRFTLTKFQNGR
SSSLGLSNTSDGVQWARKHEEVLHGSLRSCTHNTSSEGDEQQKRPGDVKL
FGKILSHQSSLQSPAPPCNGNKSKAPSPNIDISSVRLLNSPRDRVVCSSR
PGITHLGLEERTAKSYGHLDGSTTQPEQLLMMAKCQSLAGVPFYSAKNGT
VGVFSDYQQASIQSHQSDPKRLERFSEPQKRNSMEFISGFQQPSKIPRFG
GAGILVSGVSDPVAALKAQYGPGSKVMSSDMDPWKDIGSR
>Pgl_GLEAN_10021620 PgMYB25
MSMSMSMCSRNKKEKDGEQSIIRDGGAAAAATMRKGPWTEEEDAQLVRFV
RLFGERRWDFLAKVSGLRRTGKSCRLRWVNYLHPGLRRGRITADEERLIV
QLHALWGTRWSRIARSLPGRTDNEIKNFWRTRTRKKALEERRHATGDGEE
GAASSPLSSSETTASCCTGSPTTPSSSAAASDDSALREGSCSGGDAEXGH
RGEPAPAAAGVQLHYGPAVERDRGSRCGGELRARRLGSRWPLLLWRCRR
>Pgl_GLEAN_10021618 PgMYB26
MAAATMSMCCRNKQKKDGERSSGGGSQQSGMRKGPWTEEEDAQLVWFVRL
FGERRWDFLAKVSGLRRTGKSCRLRWVNYLHPGLRRGRITADEERLILEL
HEQYGSRWSRIARSLPGRTDNEIKNYWRTRTRKQKAAKTASASASASSSS
TFWNEIAAAEAAASYMMADGWGGAGYPAAAAEPPVIPSSPVWEYCSDYSL
WRIDDEEYYKKILDAS
>Pgl_GLEAN_10011728 PgMYB27
MSAPDAAAERPPATRKTSWSKDEDAVLRDQHLAPGVDAGRPFTAEEDAVV
VACHRVFPNKWSTIARFLQGRTDNDVKNRCNTALRHLLNPQQPGTLPLFP
LAQGDVRASARHGSPVVLRRRQPPDEAAGEDHGSGACLDLFPLVPGDLVN
VGRNNAFEAAAMDADVVGAAGDLLEMRLWPASTAMAVFRAMVQAVRAP
>Pgl_GLEAN_10011717 PgMYB28
MPGFARRGGRVGEDDILRKAVETHKGKNWKKIGRTDVQCLHRWQKVLNPE
LVKGPWSKEEDEIIIQMVNKLGPKKWSTIAQALPGRIGKQCRERWHNHLN
PGINKDAWTQEEEIKLIHAHQTYGNKWAELTKFLPGRTDNAIKNHWNSSV
KKKVDSYRASGLLAQFQGLTPVEYTAGSLNVDSSSAMTNQISEDSGFNVC
REVEDSAELSQSSFVKGSCSQEEQTDVALGSHLNVHESLCEDGFTNSDNV
ASALPDMHHQLSTSDMDQGKHLQGEFSQGMDLDTHLQQEFSQGMDLHLDI
DEVPNNFVITDSQASSELAGQFQDAQIMHNSENDRGSLIPSVSECEHNIN
MMSEVDIQNDNCFHTEQWQDISIRPDVYSSEAASNFSVPLCPLKTEPASN
FSAPLCPLKASEPASNFSAPLCPLKTSEPASDFSAPLCPLKTSEPETMMG
DHLYYQSSETSLPPSFIFSDVAYNESDAKFETSHCCQDFEIKTRYNTSGD
PGQNSYISREDDRNQTSEPMDSIPEPEKEQLVVLQQSCLEPTAYNEEEAL
PSQGDTMLSEKEDAGALCYEPPCFSSFEVPFVSCELVTSSDLPEYSPLGI
RELMRSSLNFPTPVRLWGSPTRDGSPDAVLKNAAKSFVRTPSIMKKRPRD
LSSPSPDIRNEKKSNTEKDCGRSGMSSTRIGKSFMDIPDDFFDLVSPRSA
FQKKLKLSQENKENLDQITDQGENEGNSKHSAGILTESSVDNQNTPKHGP
NYESQRLNTSTKALSNSKDIIFSRSKQSELLLEKSAPCIDAEYEYVNILA
DTPGIKRGLESPSAWKSPLFTPFQDAHFMSPASRSLDALGLVKQINEQSA
AALEEAHEVLASGSPWKRHSKENSDKKNVENASWKNELVTSKSLSKVMAE
GRVLDFNECSTPARKKEDKKMDIVGSASSPVASSYLRMNVR
>Pgl_GLEAN_10038213 PgMYB29
MLPDHPSLSYDPDKPSTYVCTPPPLMEGCGVHKQFYGKLHIMPMHSDWFT
PTTVHRLERQVVPQYFSGKSQGQTPQKYMMLRNRVIAKYLERPGKRLVFA
ECQGLVTSTPELYDLSRIVRFLESWGIINYLATGSVHRGLRMAASLVKEE
TTGELHLVSAPMKSIDGLILFDRPKCSIRADDIASGVSTSSAPVVANGDA
DSANLDDKIWERLSEASCSFCSQPLPSLHYESQKEADIALCSDCFHNSRF
VTGHSSLDFQRVDGMKDRSDADGDKWTDQETLLLLEGIEKYNDNWNHIAG
HVGTKSKAQCIQHFICLPVEDGLLENVDVPEASLPSRMHSNGFLHSDSNG
STSGCLPQSSQPGNQIPFINSANPVMSLVAFLASEVGPRVAAACASAALS
VLTRDDSRMCPEGINAVGHAAHLNYGPSSSISPETVKHAAMCGLSAAATK
SKLFADQEEREIQRLAATIINHQLKRLELKLKQFAEVETMLLKESERFEL
MRQQLAAQRIRILSTRLPSSGGTLPGGGSTVAMVSNPMNQAAGLRPPMMQ
GSMPQPSMPAMYANHMQGHPQMAALLQQRQQMLSFGPRLPLSAIHPGTPS
SSAPSMMFNPGMPNSSAPNHHSLLRPPSSGNNSNVG
>Pgl_GLEAN_10038222 PgMYB30
MGRSPCCEKAHTNKGAWTKEEDQRLVAYIKAHGEGCWRSLPKAAGLLRCG
KSCRLRWINYLRPDLKRGNFTEEEDDLIVNLHQILGNKWSLIAGRLPGRT
DNEIKNYWNTHIKRKLLARGIDPQTHQLLSGRAAANAQSNRPHQNHQLAA
AARSSSSPQTSGAGHSSDEDSASVPYHGGIDLNLSLSPPSQPSSPVAAVA
N
>Pgl_GLEAN_10038224 PgMYB31
MGRSPCCEKAHTNKGAWTKEEDQRLVAYIKAHGEGCWRSLPKAAGLLRCG
KSCRLRWINYLRPDLKRGNFTEEEDDLIVNLHQILGNKWSLIAGRLPGRT
DNEIKNYWNTHIKRKLLARGIDPKTHRPLSVVPAAAAAPSSSRPDDHHQR
ETARSSCSPETSGACCHSSDDDSASASHHGSIDLNLSISPPRPRDPSPSP
MTTTQEAEATSRATTVEETTPTRKS
>Pgl_GLEAN_10009918 PgMYB32
MGRPPCCDKIGIKKGPWTPEEDIVLVSYIQEHGPGNWRSVPTNTGLMRCS
KSCRLRWTNYLRPGIRRGNFTPHEEGVIVHLQSLLGNRWAAIASYLPQRT
DNDIKNYWNTHLKKKLQKHQAIGAIFAPPPPPSSESSSSIIPATAGGGGA
SHHVDLHHHDTIIGGGNYAGSAACSNPAAEAAQLIIARRPPLFAATDGDS
SSSSYYASSMDNISKLLDGFMKSSPPPQNDDAADIKPSTADVVVDLNPLL
SFNHMSAGGGTTRLPAFNDMLASPPPAPQQPPLTMGHHGYGDEPKQQHHQ
QGPLSPIEKWLFEEAAEQVVDVDLMDLSDACCSSVPMMF
>Pgl_GLEAN_10013171 PgMYB33
MDFSCFQPHTGICNYLPFDSYMQQNGHYELHPVDHPFEAISGDYASVGSM
VPTATFNDIGHRQYFAERDIKKPIFGYASSTDHRVGSQLPMLTPKTEVSH
LIESGLGSYKTYEMSDRFVPRKKTSSYSLKKVNVVKGQWTPEEDRKLVKL
VEQFGLRKWSYIAQMLPGRVGKQCRERWHNHLRPNIKKDIWSDEEDMVLI
QVHKEVGNKWAEIAKRLPGRTENSIKNHWNATKRRQFARRRSRSSSKGPR
SSTLLQNYIKGLGISPSKNPAAPLPQPTLLPLPSPASPGAKSSSATIDKM
LERSPSDILDPQVMLSVYEYNCSETQSCEELVAPICGYDDFSVVGMCDSL
FDAKEDAFQQATYAVDDDIDMNYIFNHLDHTIKADPEISDMEMMMWDDDA
LGCVFEPAGSEAVRVKEEMDLVEMVAATQQKYGEAEKSQLLSD
>Pgl_GLEAN_10022854 PgMYB34
MGRAPCCDKASVKKGPWSPEEDAKLKSYIEQNGTGGNWIALPQKIGLKRC
GKSCRLRWLNYLRPNIKHGGFSEEEDRIILSLYISIGSRWSIIAAQLPGR
TDNDIKNYWNTRLKKKLFGKQSRKDQRQQQQFMRHPTASEGMKQEATTGD
ANGSSGVPAVTYNWHQQAITGAVPPVPGIMMEGHRIGDEVDESIRKLLYK
LGGAGPFATLPVPQCVPPMYEGSPSLMPPSCTVDTTSLSEGGVQGSSTLP
ALELDQSFHFNQVKLDGLDCFFGMSMDQSMRWNEVSPLVCPNNTVASSSQ
GMQQYCLVDEPANLGMK
>Pgl_GLEAN_10013746 PgMYB35
MLQRNLPNLSLGISPPAASSAAAYGDAKAVAKPPSAEPSTAPHAEGSGEV
GFFANPSPVAEPPGLSLGLGTPXXXXXXXXXXXXXXXXXXXXXXXXXXXX
XXXXXXXXXSTTKRSARAPRMRWTTALHARFVHAVELLGGHERATPKSVL
ELMNVKDLTLAHVKSHLQMYRTVKSTDRSSLHIGTGEALPLQRTTTATGM
EAAEAGTAAGGGGVVVAAQGEVINRHLAMGLHASAEAVATNCSSPASSSS
PSLASVELLADDLYAPNLEITLGRQDWSMVERPEELSLKYL
>Pgl_GLEAN_10023444 PgMYB36
MGRSRGVPNSGDDDTGHRSKRRRVSSSGDATDTISAAMGGAGEGGGKKAL
YHCNYCNKDISGKIRIKCSKCPDFDLCVECFSVGAEVTPHRSNHPYRVMD
NLSFPLICPDWNADEEILLLEGIEMYGLGNWLEVAEHVGTKSKQQCIDHY
TTAYMNSPCYPLPDMSHVNGKNRKELLAMAKVQGDSKKGTTLLSGELTPK
AESPFSPSRVKMEEALGDGTAGRSPSHMAGGANKKASNAGQNKDGANISK
VEDGHVDRSIGVKKPRYSADEGPSLTELSGYNAKRHEFDPEYDNDAEQAL
AEMEFKETDSETDRELKLRVLRIYLSRLDERKRRKEFILERNLLFPNPLE
KDLTNEDKEVYHRYKVFMRFLSKEEHEALIRSVIEERKIRRRIQELQECR
SAGCRTLAEAKIHIEQKRKREYELNAQKTKESGQLIPNNKSVQKMNRPVK
IESDGNLDPKKGGAGLDSPKTTGLTSVKQWDDWDIVGLPGAELLSASEKL
LCCQNRLLPSHYLRMQEVLMQEIFKGSVHKKEDAHVLFKVDPTKVDTVYD
MVTKKLGNHEEAPTV
>Pgl_GLEAN_10002927 PgMYB37
MCTRGHWRPSEDEKLKELVALYGPHNWNAIAEKLQGRSGKSCRLRWFNQL
DPRINRSPFSEEEEELLLASHRVHGNRWAVIARLFPGRTDNAVKNHWHVI
MARRCRERMRMSNKRGAGGAPSAAAAGAAEDENNPRNAKRTRPDSSSMAS
LLHKYRREFAVPFAINHDSNKEDDYCSTTNEEEDTNKSVEFYDFLQVNAN
SSDTKCGSSIEEQEENRDDQAEGQVQFIDFLEVGASHRQ
>Pgl_GLEAN_10001156 PgMYB38
MEPKPSSAAHGDAPAXXXXXXXXERNASFHVPPHLLHSGPLTRASRHSPH
KLAGTPSEVGQASSAAAAGDGVSGGQGEVDAIRPEGEETPAAEQPLVDEV
FEAVRSRGAGVHVVPTFAGWFSWKEIHLVEKQTLPSFFNGKSEKRTPEVY
LAIRNSIMVKFHANPQLQLESKDLAELSIGEADARQEVLEFLDHWGLINF
HPFPPAEQEGSKPEESQDNSHDEDKASLIEQLFKFEPVQSYIMPLPKKED
VGVPPPLPSLFPDPVLLEDVVAAAEPSVEYHCNSCSVDCSRKRYHCRTQA
DFDLCCDCYNEGKFDPGMAKTDFILMDSSEVSGASGTSWTDEETLLLLEG
LEIFGGKWAEIAEHVATKTKAQCMLHFLQMQIEDRFHDGEDVNQNTPGST
EQATTEKGITETSDKMEVEDKEEGRDTVDEKVSEKTEGNCEETKTEGASA
VENKDTQNSGGKDSNASPNTEEPKQSSDDHPTVKENSADVDTSGEKLSDV
ALDILKSAFEAAGHSPEYEGSFADAGNPVMALAAFLAGLVEDENATTSCR
SSLKAISEVSPALQLASRHCFILEDPPNDLKDISVSVSNISNKSTDGNQT
KEEEMTENSVDTEKKENNEKEDNSLSVEKHNNSSISHNDHQESDDKSISR
DDCPIVEPKTCNAKESGDPTAIVDKSAIDNTKGSNICASDPKQVKDKPSV
EVEARDDSSSKGKDELNKTEDVVASPATVKEQKQSETLENGKMGEPNSIE
RIVAIANEEKGAAVTANQNDSTTRLRRAAATAISAAAVKAKFLGDQEEYH
IRRLTAMMIEKLFQKIEVKMSLFAEIEQVVLRTREYTEKTRKKLLLERNA
IIAARMGALPSRTNQPGVAGSRLPPGYGNPAGLIWWAAAMVEGMVVAVPT
GVKAEAAADASAPKAGSPKSVLEDEKISEPKNGNASLATEPTRQAEESSD
DFVDASSSLPTDLEIDSASAPVAKAVKEEEQLQEPVKEEEVDDSVVESLS
VPIDLEAKNGDASLITEAMKKEEEQLEEARIKAEEEEEARKREEAAKLAF
DPEARYSKLDQLLTKTQLFSEFLLEKMDRIADEVVEPQAEELPAAEKKKG
RGRKRKANAAPQYNDKKAKTAVAAMLTRSREEHLADDCNLSEEERLEKEQ
ANLVPLMTGGKLKSYQIKGVKWLISLWQNGLNGILADQMGLGKTIQTIGF
LAHLKGKGMHGPYMIIAPLSTLSNWVNEISRFVPSVTSIIYHGDKAARAE
IRRKFMPKIKTAVSPDFPIVVTSYEMAMSDARFLAHYKWKYVAVDEGHRL
KNSKCKLLREIKRIPMDNKLLLTGTPLQNNLAELWSLLNFILPDIFASHQ
EFESWFDFSAKGGEEKEETEEKRRVHVVSKLHAILRPFLLRRMKEDVEQM
LPRKKEIIIYANMTELQKRIQDHLVEKTFDVYLNKESDIGLYPPVDKLLE
QCGKFQLLDRLLTSLLARKHKVLIFSQWTKVLDIMEYYLDSKGLEVCRID
GGVTLEERRRQIAEFNDVNSNLNVFILSTRAGGLGINLTSADTCILYDSD
WNPQMDLQAMDRCHRIGQTRPVHVYRLATSNSVEGRIIKKAFGKLKLEHV
VIGKGQFEQERAKPNVLEDGELLALLRDEQAEEDRMIQTDISDEDLLKLM
DRSDLSGPPGAADAAPLIPLKGPGWEVVVPTKSGGGMLSSLSS
>Pgl_GLEAN_10005188 PgMYB39
MMSTTASAASSSTGKAGKKTRKPYTITRPRERWAADEHDRFLHALVLFGR
DWKRIEVFVATKTSTQIRSHAQKHFLKAQKLGIAAPPAHPRRAAVLAQAQ
PPVSCPPAWFPGDAMAPSDETLIQLPLSPDDPHFAQVYRFVGDIFGSDAP
QPVETQLQRLLGADPVIVDTILRVLRNLEENLFL
>Pgl_GLEAN_10013105 PgMYB40
MGAPKQRWTSEEEAALRAGIARHGVGKWRTILKDPDFSSTLCYRSNVDLK
DKWRNMNVIISTSSSRDKGKAAVKKTRPTPKNNDQTVVISTAVTSDIDDE
IVDEKPIAAVPSEAQNTSNANKSLLRLDNIIMEAIKSLNEPTGSHRTTIA
NYIEEQYWPPNDFDHLLSAILKDLATSGKLIKVNRKYRIAPSSPNSEGRT
PKMLLLEDVQRQPIKIGSIGSKTLTRSQVDTELAHMATMTAEEASAAAAR
AVAEAEAIMAEAEAAAREAEAAEAEAQTAQAFAEAALLTLKNRNTAKLVI
VLVHGSLICPIILTHVELGFVIPSAADWLLKENPELSISVYPFCTLRL
>Pgl_GLEAN_10009335 PgMYB41
MRPPTLRGPWTEEEDETLREMVNVYGERKWAAVAQHLPGRIGKQCRERWT
NHLRPDIDKTKTIWTEQDDILLIKFHKIHGNRWSMIARELVGRSENAVKN
HWNATKRSLKAKRRLKKKKNAEAPPGQQWSILEQYIRSLPPAAVADDGAG
GGVPQQEPSDDSPPSSYNTGSTPRAPASTRPPWGLAAEEVNLGAMNPDLV
PPSYLGLDLNSYYYYSGEPLEPAAAPPQMLMMMEQDQQEQASNYYDAGNS
SSNNLITYPFVDQMAWQQSSVHAADAYYANNDNANANAGHYPYYYYYGDA
AGAGPSGGGDAAVPDDVDVVQMASMEFQMNPSEDEVTLNLAGFM
>Pgl_GLEAN_10031141 PgMYB42
MERSPGAALTSSSPEEEEEEKAAEGHAGEEAAEQEQEEEAPPVVLKKGPW
TTAEDAMLVDHVRRHGEGNWNAVQRLTGLLRCGKSCRLRWTNHLRPNLKK
GSFSPDEELLIAQLHAQLGNKWARMAAHLPGRTDNEIKNYWNTRTKRRQR
AGLPVYPPEAMPPTSAAATAGGLGGGVALPDHHHQNAVSLEKMLQELHDA
IKVDPAALAPANGGAARPGGAVLERHGARENKSGGQHSRDDDIETLFDLM
IPTLNAPETVPVPPAAAPNHSGSTSQHSSEDQDPSTVDLGVDLPVAGGGG
GSSDQDWGLDGVCQWSSMSRIC
>Pgl_GLEAN_10021657 PgMYB43
MKKKGKWSKEEDKLIKNHIEKYGIGRSWQALSNTLGLQRCGRSCRSRWLN
YLRPGLKHGNFTPAEERIICEMYSKRGSCWSVIAAQLPGRTDLAIKNYWN
STLKKKFPAARTPAAYRRRNRPACSTSSDAGTPARDLQLIGYSSEESSTA
GSSPAKAVLADPKPIQAVQPPVPVIAAGQGAIAAVPVSGPVRIEQKQAVV
SRPRLEKKPPPPPPPPACDQTGERVMDIVCAPMSPVPLSFIDPDELPCIY
QFDDIDSFLPWFDHH
>Pgl_GLEAN_10004603 PgMYB44
MGRAPCCEKEGLKRGAWSPEEDQRLVAYIRKHGHPNWRALPRQAGLLRCG
KSCRLRWINYLRPDIKRGNFSADEEALIVRLHHELGNRFFF
>Pgl_GLEAN_10032286 PgMYB45
MSFIYSNQQTVDLIICDVFFPTEDSLLILQEVTLKFDIPTVIMSLNGDTA
TVMKYITNGASDFLIKPLRIEELKNIWQHVFRKKIGAERRKCSNDQHIDQ
MLYQPMGITEATATLDSDGIRGNSGTVTDIRDLRKSRLSWTMQLHRQFIA
AVNSLGTDKAVPKKILEIMKVKHLTREQVASHLQKYRLHLRNSTQTLHKD
DTTSSSSHAHESSICRTELNTSSNSLYYDQDGCMEITDYSLPMDGGVSSG
SDCMLGERNNYSPEGFHNFRWDPDKQGSETTYLWNFEVE
>Pgl_GLEAN_10011452 PgMYB46
RVGKHIARKNNSHWTAKEVKLLVHGVSKFGVGRWSEMKKKYFKTSVRTAV
NIKDKWRNLLRAYQKNVHKHTLLDLEPPLVEKIRKLAVKHPYPKRRLS
>Pgl_GLEAN_10010867 PgMYB47
MDLELQLLWTGPGNEKHLDQCIGVFDDHCSQQVVMFNPNFGLQEPSASGG
RKHGRKNNDHWTQDEVRLLVHGVSEYGVGKWKDLKTKYFFASIRTPAHLK
DKWKNLVKACKKESGRMLLPLEEALIERITEIDDDNPYPKQSNNIHRLAP
TTTSPDLLSELPPAGRWSVVKARSKRASVHKSKNNDDEGTSNIENRMAQH
AYHALSSHGSSASPGRPPAPRNKQVALISTRALS
>Pgl_GLEAN_10021368 PgMYB48
AAAPTAVPLGDEDDEGPRRVRKPYTITKSRESWTEPEHDKFLEALQLFDR
DWKKIEAYVGSKTVIQLVNLHFIKYAERKIGDDVALQVVLPQQASHIMEQ
GCGTSMDTPTEATDLSANDAFLSWENDPVQQFSPKHTQVSFKWVLITDPP
GSGATNNCSSSTGSQSGTWPTSEATEQAVMLPPLRAMPDFARVYSFLGSI
FDPETNGHLQTLKEMDPIDAETVLLLMKNLSINLTSPNFEEHRKLLASHG
SSMDQDMGSPHTVHLPFM
>Pgl_GLEAN_10004924 PgMYB49
MGRSPCCDQDAGVKKGPWTPEEDKLLVDYINENGHGSWRRLPKLAGLNRC
GKSCRLRWTNYLRPDIKRGRFTEDEEKLIIHLHSILGNKWSSIATKLPGR
TDNEIKNYWNTHLRKKLLSMGIDPVTHRPRTDLNLLANIPNLLAAGIPNL
AAAAQTTCWDINALRLQADAAKYQLLQGLLRAXXXXXXXXXXXXXXXXXX
XXXXXXXXXXXXXXXXXXXXXXXXXXXXXXXXXXXXXXXXXXXXXXDLMA
LLAATGNGGVVTQPGVDHSTTTTRAHHQYDGLLNLPALTTVPTATLPAMS
SFSGLLSSFGGALAGDGLSSTTELGASGSSMTAAMAPPLVAAEECNAGGG
TSTPCGEETTPASSPFEGLGNLNLDDEFNSDSWRDLLEQMSWLNNPNEQQ
L
>Pgl_GLEAN_10029006 PgMYB50
MDPTKSDKEWSASEINMVKSLIARYNANNSFADGMNKKHDDIINEVHAMF
PMKEKHQAIGLYVDLVVQMMQSGTVGSSVQHSGAASGDLVDNNIEIQVED
SAMDNTGMFLGYPTTDTGALRMAREVPHRQPAPRMARLQTRFWTKAEHRL
FLRGLQMYGRGNWKSISKYFVTTRTPIQISSHAQKYFKRLENASRRQRYS
INDVGLYDAEPSVQNNTWEGLTFTKGAYDTSRPYGANGQHTTMNNVAQVG
SPILNHAETSNQAGARAGDQQMGTASSDVAPTMEGDVGLQEALAGDHLGD
FLDDLLMDMDLF
>Pgl_GLEAN_10029495 PgMYB51
AVDEGGSRALASDDAVATVDQFEAAVGNSFSQVVLRGLWGDRQAAEERVR
ELLAAEWAAMGPSVLEVVAERIVGDEAVGTWREADEATRAKFRVLAGEEK
TREILVKLEESTSRVNPISTPEVSKVVDALKTSCAKLQSVVEDPLPAAKA
AADEVLATRINRPVNLNAESGQPAACGTAGPSVLNERNNGLNKGAPPSLM
DWNPTARTFEWEESLDPESSEPALRRPHLPSPRRIPVSPLPAAENKNKRR
KARKWCLLEEDTLRKGVELYGSGNWKDILNNNPDVFIGRTPVDLKDKWRN
MMRQPAAETAAGSFLFMLGAFAMPPPPCSSGPSRLLPSLTLYSRRTVAAT
TAAAASSPAPAGGHGRSPLRYAVLGAGFAGLSVAWHLLKHSPRDSRVSVD
IYDENGVGGGASGVSGGLLHPYSPKVKLLWRGAEFWKESLDLLRSAEQAN
GTAGSDTTSQDQRLIWRRGIVRPPTTEKAADILLEALFSACQNLAYEVSS
LPNEHKEIKLYKQHVDNLHQLAGDYDSVIICLGAKACSLPELANKLPLRT
CRGVIAEFQLPSDTVEEYGNQSPSILSDAWMAFQGPRTVSVGSTWQWKSE
NYSSTVSDEEAITAKDELLPKASGVYPGMSKWDFVHARAGIRAMPPLTTN
GSLPLLGCLDEMVSKKSNCKFWLIGGLGARGLLYHGLVGKLTAKAVISCD
ESAIPSEFTCWKGIKPSQ
>Pgl_GLEAN_10036530 PgMYB52
MIDDEANFDILDASEEVQAAAAKFRPKQRAKPRKTILSSRSAASHPTVEN
GNGKLGVSNQLSSSKELASQERASLTCPGSETIDDAAGSQGILETPSADV
LTVPLRAPGGTSAADRISQDDKHDADSSKLVMHKESLVIPDIQVSPASSC
GRTIDDIVEFEELFGAQDKEERVAKFQPKVQTKLLKATKYQKTNQKVEAS
PVDVATQKESGDNIQTRLHYDQLQDTKCHGSMQTSYSEGLLVTSNSDIGN
LANLDSVHEVSVQEETITKFCPKLQPKHGMVSSKVVGTNDNSTADTLMVG
ICAENNDMPIKPKDQETITTSATWSPQDAVATVDLDNHNELINSPIDGTQ
SMVGEVPAEATCKSQPNAGREKGKGKSVSFAMSDASGVVTPTNSEMDNFR
DSYNDKLTDENLSNLSQQTVQKNSNDQEHNEGEPLDPPFEQEPKSGVGPS
MKLRSRKKSQKTGTHMDTDNNFGEDSVEPSLAEEDNDSGDDYTAGTTRKV
RKKPRDSAEELLHQKVQKDKSQVKTLLEKPREEIDPMKLSAAHLRLLQEA
RARVNGKENPPEPSSNSSFQFDDMDDLDYRDEERNFDNDRTQNPTQNVTK
LNYHSYMNKQTRGKWSKSDTDMFYKGLRQFGSDFAMIQQLLPDKTRHQVR
AKFKTEEKKNPLLVHDAIIHRSGDNLYFKTVIKNLNIEDVAQQEINNTHK
QDGASSEQGPGKEDVLDDFIRGEEDDLNWLDEEHSVQKPDVQEEHASGNV
DDGDLGDVFDWY
>Pgl_GLEAN_10023193 PgMYB53
MGRRACCAKEGVKRGAWTSKEDDTLIAFVKAHGEGKWREVPQKAGLRRCG
KSCRLRWLNYLRPNIKRGNISDDEEDLIVRLHKLLGNRWSLIAGRLPGRT
DNEIKNYWNSTLGRRAAGGGGNRVVVVGTPDTGSHSDATPTGAATVWAPK
AVRCTGGRLFFHRDLRLDASPAGETTTPTSGGGGVVGGWREGSSDDYCSP
AASAFAGADDDRAPCFSSGGDWMDDVRALASFLESDEEWVVRCQRADQLQ
>Pgl_GLEAN_10023203 PgMYB54
MDPTQSNGVWSASEINMVKSLIARYNSDNSFTNDIYKKHNDIVNEVHATF
PLKEKHQIICLYANLVMEMMQSGISDGSNHSTVTSRQLLNNNIEIPVEDP
TMDNMDMLFGSPTMEIGATRVAQEVPLRKPTSQMEKKNIGFWTKPEHRLF
LCGLHVYGRGNWKSISKYFVKTRTPMQVSSHAQKYFQRLGNSSRRQRYSI
NDVGLYDAEPWAQYNTFNKEGSTFTGSIYNPNRYGGIGKHATMKNLTQVQ
SPNLHHASQATNDNGQATAWVGDQQMRATSSSAPPIMQGTRSPQVAWAGD
QLGDFFHDQLMNMDMI
>Pgl_GLEAN_10028194 PgMYB55
MGRPPCCDEKGLKKGPWTPEEDHKLMNYIQKHGHGSWRALPELAGLNRCG
KSCRLRWTNYLRPDIKRGKFSKDEEQTILQLHSILGNKWSAIAKNLPGRT
DNEIKNFWNTHLRKKLIQMGIDPMTHRPRTDFFAALPQLIALANLHQLIE
QQQWDGHTTMQQTEGVQADNHQYMQAMLQSAASSTTPNPITVSSLTTDLE
QISLLNPQHMLSPTLLESIDGEDIARQVPQNQPITFFDQPVSNINLSSDN
NVGSSERCLVEGGSSSQKSILLSENSLPPLTDMSASNPRNAISTLKCGAS
STLTLSPSWSEILLDEELMREFE
>Pgl_GLEAN_10005446 PgMYB56
MDPRFNGEWTAYEIQTVKSLIACHHTNNNHANNMNKKHTDIVDELQAMFP
LKEKYQVTNLYIKLMVEMIQSGNKYVATSRNIMNGNFGMTMEDPTMGNME
EVLSSSLMEEMGAMRNGEEAPHKQSTIRKERQRATRFWTEEEHRQFLHGL
HAYGRGNWKMISRNYVPSKTPVQISSHAQKYFQRLQNPTKKQRYSINDVG
LYEVQPRAQNNVSSQEGLTFTRGDYNTNHDGSGGQPSILTNLPKVRSPLP
HIASQGSNIQADTLATGHQPDMEANGSFLAPSMEGGGNHKAWTSDNQGEF
LDNEWFIDLQMD
>Pgl_GLEAN_10032646 PgMYB57
MGRQPCCDKVGVKKGPWTAEEDQKLVGFLLTHGHCCWRVVPKLAGLLRCG
KSCRLRWTNYLRPDLKRGVLSDDEERLVIDLHAQLGNRWSKIAARLPGRT
DNEIKNHWNTHIRKKLLWMGLDPVTHLPLQETPAPPPPLPPQEQLEQPAP
APASQEQGHQHQQNDGGLMLQDGDATEWPEPMYLFGMDDGIMDAGCWDGL
FAGCGGMGVDTFDGYPAGGFDDQDDWP
>Pgl_GLEAN_10036901 PgMYB58
MERVSAAEKAVIGNKGEKKGHKSKKDKGKRKGKKDKAQGHGGDGDGSIQS
DDMNHSVEIKQAEVLVEMAEKPCLEHTEDIASKNDVKEHRKKKKKDKEAD
TISQKQILAVNDERVGSGYLERSMGKGEHHSVSKKGKQKHQDAETSLNGS
CDDKIISRGDKKKKRKERSDTPEEVNEADMSMMGQKADGKKKRRKERDNV
GVDLSQNIAAGNGNSRNKEEKASKDGSGYLERSIGKGEHGSMSKGKQKNQ
DGETSLNGSCDDQIISRGDKKKKRKEHSDTLEDGNEADMSMMGQKMEGKK
KRRKERGNVGVDLSQNIPAGNGNSCNKDEKASEDDNGGGKSKKVNVAHGK
DKGKRVSFTDDVEVYKIDGGDGDEEGDGSDDSELVHGQRFTLEEDVKLME
AIQEYSEINQLGERGLEMIRECSKYPEIRGCWAEIAKSLPHRPVMAVYKR
ARILLYRSDERKWTPEEYEIVRRFVEKNGTNWKGLATELGKSEIHVKDAW
RRMKPKNLRKGAWTQDEYQNLFDLVNLDLRVKAHQKITPTHRQLKDNISW
EAISEKLTTRNNKDCCLKWYQQLASPLVKEGIWADTDDYLLMEALQKGDA
VCFEDVDWDRLLDHRSGELCRRRWNQMVRMIGGHREKPFIEQVEVLARRY
CPEMLDYRKPEARQSDASDLAPDELAGESDS
>Pgl_GLEAN_10023164 PgMYB59
MVDAHSTKDWPSIARAVPGRSQKQCRDRWTHYLDPAVNQMPWTEHEEIDL
IRAHKIHGNKWCELAKLFPGRTGKAIKNYWTGAMKKKIKWNLGSGSPEQL
SPCPNDSMIPVGRDSTATSSQDSSNNIQVSSADLPVRPKSKHGLPESCRN
VCTLKEKGSDSIHDEWSAPHSVHVSQMVDGQTVGSSLPILTEENLVSSLS
SVGEKLSCVAPNSTKPLKEEESTKFLEIPQALACFQSSNSHSDVICSSGD
PESRQLHLASIADLLDMSYCESLMVIAPDSRNEEDFMRGM
>Pgl_GLEAN_10023163 PgMYB60
MEQSSDGMPRQRWKYILDPAINKEAWSQQEELRLIRAHQIYGNKWCKMVK
HFPGRTNNALKEHWRGSMKRKLDSYLASGLLEQVPDLHENLSVPQTSQSD
SPKDSEVSYDRSQFSSILSTSFKLKQELRELSENADTSVGECSDFTYAKA
LDAHSAKVSESIITKPQQCAKARKNLDLVSTPVKLKEDEILTKMVTKHGL
KNWQTIASAIPSRNAQQCRIRWTRSLDPAINKQDWSEEEELKLIRAHQIY
GSQWLKMVKHFPGRTNHALKEHWRGRMKGKLNYYLASGRLEQITDLKEDI
SVPESSQSDIPKDSQGSSESNRPPSYLPPRPKSKSDLSELDENADTSEEE
SSDCIYPKGLDAHSAKVSKKIMSKSKQRARARKKLDFLSTPVELKVCTAA
ASCQRPPLKMEQTTPASDNNSPSDECQGIPQNAASEPVDVVIPTAASNHP
NDVHSLANPDICSLEIQETDASDLLDMSYCDGLMIDSPPYLHGSSFI
>Pgl_GLEAN_10037977 PgMYB61
MVAREELVMEEIKDKGVLVEILEDDEERSIDNKLLDLNEGLDVESDEGEV
GDDEEDEGEEGDDGGSTTDVGRSGSSSNNSSTNNNSETKKGDSKSEGSGE
QRVPTVRQYNRSKMPRLRWTPDLHMAFVHAVERLGGQERATPKLVLQMMN
VRGLSIAHVKSHLQMYRSKKLDQDGRPRGAISSVYSPMHFHFMRGDRRFQ
EMSFFQRAAMLTSSKLDHGSFASRNCSAPELSRLYGLLQHRPTAQTFDFR
NSRNHEWASSHREAIISRKDVTPPSTAAPHQTHPLAGSVLLRSERRWWPF
TDSRATAAATGERRVVAETTGREVDLSNSIGSSSQRPHHWTAAVSGEPRH
LPFRWRPAGGGGGRDVGGGYPGNSAKITPRSSSDPVVIDEALDSQQLERQ
KHVAQRESAMPVYDACRKRSSPEEAQDETSDLQLSLSPTTVMEGKKRKTT
ALSSSEQEIMDISELSISLSLSPPDAASMQKRQQEKTRRSNDSRSGGSSG
EAVLGQSTLDLTMSIRALE
>Pgl_GLEAN_10028237 PgMYB62
MSRLLQKKRLSDMLGPQWSKEELERFYSAYRKYGKDWRKIASAIRDRTSD
MVEALYNMNKAYLSLPEGTATAAGLIAMMTDHYNILDGSNSDHESNDSPK
TSRKPQKRGRTKFQSVSKTSDTRYPDQLQSQPASSSYGCLSLLKKKRSGG
SRPRAVGKRTPRVPVANMYHRDERGAPQRQAKPDSNHGDDEGAHVAALAL
AEVYQRGGSPQVSQTPGRSGDRMFLSPIKSSDRKNADSEMGSSKLHGFQL
DADYPEASLGSREAETGDYTKGASYLMTNKGSPSGKPQKKVKRSQKRRKK
AVRKTGDKFEYDREACSGTEEGHSARKTKEEPELETLGRKTAWPSSTSNK
RSRQLFFDDDISALDALHTLADLSVNILQPSSVVESESSAQIKDENKDND
SDGKPSIPAGVSVYEQKDNSKSMAKKLKRQSEIASTDMVTRKKAKVAKDP
HHDGSTTSEVKQQACTCGVKTEKKKRKSSTGKVSKDEKNILKDVEKTEVS
AEEGKVSSYKAYTDFGKVFVDIPETTAQAATPPQADLASKVKSLQKLGIQ
KSLTPECKPTEGAGDSGIDKLSSSLSNIIDVEDKLSHGLSSRLLRRWCMF
EWFYSAIDYPWFAKSEFVEYLNHVKLGHVPRLTRVEWGVIRSSLGKPRRL
SKQFLHEEREKLSQYRDSVRQHYAELRSGVREGLPTDLARPLAVGQRVIA
CHPRTRELHDGNVLTVDDNRCRVQFDRPELGVEFVMDIDCMPLHPPENFP
ESLRQQNIANEYYSRLSEANEEHMKELCNGGGARFTSNLNGADAAFHIPP
GHPMSTLMKQVKGDSIDSIAQAKATVNEEALLVELRHMNEEVSGKQRDGE
IIRDLEHFRKQYAMVLVQIRDSNDQVAAALLSLRQRNTYHGNPVQSYPKS
MENGAFAGVPDPYNLFGYINPESGSQVIEVIETSKCRAKMMVDVAIQAMC
RVSEGENPFAKIGEALDNFNSRGTGSGSSILGIRRIPPDSGQSNASYQEN
GTPSATNNSSRLANGGNTDGQFPNELISSCVAMMLMIKNCTEKQYHPAEV
AHILDSALSGLQPCSSQNIPIFREIEMCVGIIKNQMLALIPTASG
>Pgl_GLEAN_10017572 PgMYB63
MATTTAPAPATPANTNFVPTPTAPHPRPAAPPASRAPSTLGPVKSEAPPA
PSSTTAAAAAAAAASGPEDPPYIITVPSYSAWFSFDSIHDTERRLLPEFF
EGEAAAASGCRGPGAYKYYRDTLIRRFRARPGRRLTLTEARRGLVGDVGS
VRRVFDFLEEWGLINYGALPSGSKQVKEKREEAAPQPSLPSGATAPRKLC
TGCRSVCGLAYYACDKADISLCARCFVCNNYRPGLTAANFKRIEITEDAK
SDWTDKETLHLLEAVLHYGEDWKKVSEYVGSRSEKDCIARFIRLPFGEQF
MGPKEGRMGFETDGDITDEPGAHVSKRPRLTPLADASNPIMGQVAFLSAI
VGSDAASAAAQAAISAQSHVDLNDGEIDSSVNSAMEEESSHTSGLSFNDL
LKEAATIARAQLEKEQNNIEQSLSAIVDVQMKEIQDKICRFEHKEMLMEK
ERQQLRCLRDLLFADQLAVMQHHRRHQAVATEIKPDGKPKPIINNIS
>Pgl_GLEAN_10016698 PgMYB64
MTVEEVKLQAKANGGHGAKDQFPVGMRVLAVDDDPTCLMVLENLLQRCQY
QVTTTGQAATALKLLRENKDQFDLVISDVHMPDMDGFKLLELVGLEMDLP
VIMLSANGETQTVMKGITHGACDYLLKPVRIEQLRTIWQHVVRRKSSDAK
NHGNDNDDSGKKLQAVSAEGDNGCVNRNKRTSRKGRDDNGDDGDDSDDSN
ENGDSSTQKKPRVVWSVELHRKFVAAVNQLGIDKAVPKKILDLMNVENIT
RENVASHLQKYRLYLKRLSADASRQANLTAAFGGRNPAYVNMGLEAFRHY
NTYGRYRPVPTTNHSQSNNLLARMNSPAFGMHGLLPSQPLQIGHTQNNMS
TSLGNVGGMNSGNLIRGAHMPLQDSSKCFPTGPSGNSFANISNSTPLVPT
NSLPLQSLEPSNQQHLGRMHSSSADPFNSFVGESPQFPDLGRCNTTWPTA
VSSSNIHELGQKDSMSQPNLRVNGPKLEPLSSFTEASSHIPLLGNEMRSQ
VASLASNGLTMPFNQEAVPFTYGSSTNSRDMVNNNLVLSNSGINSSLPNL
RIDNSMVPRQTLDGGNSGGGVPPLQDGRIDQQAVNSQLNYNNDLMGTSRL
QRGLSGGLDDIVVDMFRPDRSDDGVPFIDGDWELV
>Pgl_GLEAN_10027845 PgMYB65
MFPSKKATSAAAAAAAVSSNDRPMCVQGDSGLVLTTDPKPRLRWTVELHE
RFVDAVTQLGGPDKATPKTIMRVMGVKGLTLYHLKSHLQKFRLGKQPHKE
FNDHSVKDAAAMEMQRNAASSSGIMGRSMNDRSVMNEAMRMQMEVQRRLH
EQLEVQKHLQMRIEAQGKYMQSILEKAYQTIASGDVSACAGGYKSLGNHQ
QAILDVCSLKDIGPSMGFASLQDLHMYGGGHLDLQHQMERPMEAFFAANC
DMGSLGKKRPSAYAAAGKSPMMWGDDEQGKGGVDQLQMAPPPMMDAGGID
IMDSIADVYGDVKPMMSGDSTGSKGCFEGKLERPSPRRPHMGNERNMSYG
>Pgl_GLEAN_10020538 PgMYB66
MSTQSIISVKQFTGPHRMAHTCTAPQPSAHNLLSAESDSCGSAHDPRSSW
SAVQTSSVKSEMVGSLSLTKILPFNLEKCSPGSNPDDSAVSRVSQAELSD
PVSSSSSTFCTSMFSSFQTDPESCQRKGALPFLPHPPKCEQKLQQQISAG
QSSSSSSLLFGADLSSGSHDDASHSGDLKDFLNLSGDVSEGTFHGESSAM
AFSEQVEFQFLSEQLGIAMTNNEESPRLDDIYDRPLQTSSCPVPSYSDQE
GVPIAVTPVKLQLSSSQAEARNKPRLRWTLELHERFVEAVNKLGGSEKAT
PKGVLKLMKVEGLTIYHVKSHLQKYRFAKYLPETKEEKKSSSEGKKSQSV
LPGNDAGKKKSLHIAEALRMQMEVQKQLHEQLEVQRKLQLRIEEHARHLQ
KILEEQQKARNSLSTTRNSAQEEQPESTEKEETGMKVKTSSELPSWSKIS
DTDVECNSQVTSGQQKFKGSG
>Pgl_GLEAN_10018078 PgMYB67
MGCRSCDKPKMNYRKGLWSPEEDQRLRDYILKHGLGCWSAVPAKAGLQRN
GKSCRLRWINYLRPGLKRGMFSQEEEDVVINLQAKLGNKWSQIAMHLPGR
TDNEVKNYWNSYLKKRVMQAQGGSNPKSPPELTSMSTTEPAMSMTHHHQH
HVKNSSGGGGGGGSSTTTSHDQDANIISSSNGVLSAPMLAAQQQPFDHQA
QQQQQQQPKNFVFSDWAVPAPESYSVSAHCWPASTASSGNVTPSHGGAFG
XXXXXXXXXXXXXXXXXXXXXXXGFSSTNDDLLF
>Pgl_GLEAN_10031135 PgMYB68
MNQLYNGRVSHCLSSPITVVPALSEVSFPSFPEQRSSYGERELPINSVTS
FGTSMAAHNVMPTCMLASNFTSDLHANNKSPDGKFCSGPYVKEPSDLDTQ
LPSAHSSFLGNSRSLMMDFPEVSGNICSDKEKLLGLFDCSASDSFSDLQN
VTAFGQQVQDTITIAPNTHAALQNEWFSSGSSMHVPENIVDPRSVIPDTP
RSLSCCYTQRSIPNPFSCDEFCADNLRSNNASKSRMRWTPELHERFVDAV
NKLGGSEKATPKAIQKVMKVEGLTIYHVKSHLQVFICVSGRSSSQTDEVP
TLQLKGTGKFEGLMAQIGLQKQLHEQLEIQRKLQLQVEEQSKYLEMIIAK
QNESLKKLGAFPGFRDGFLHVLDGKERT
>Pgl_GLEAN_10002978 PgMYB69
MGRAPCCDKASVKKGPWSPEEDAKLKAYIDENGTGGNWIALPQKIGLKRC
GKSCRLRWLNYLRPNIKHGDFTEEEEHIICSLYISIGSRWSIIAAQLPGR
TDNDIKNYWNTKLKKKLLGKRAPSRRARANHQDPYLAAAGGNIITELVVV
FFSSPHRTLLACATHISRKELTYTADERSKAELPHTVRASQDGYWSGVRE
RELRGAPAKEGGRPRDASMKGGRACHGAAAKGGAGPEEDEEDRPSHEEDQ
GAGREEDEEGVARHRHSSSPEMGKGGGTRRGQDRRRCGREVRCEQTRQRW
GRKVRPSSSEVRKGGAA
>Pgl_GLEAN_10010695 PgMYB70
MFEGMERAYGGAAAMGGVVLSRDPKPRLRWTPDLHERFVEAVTKLGGPDK
ATPKSVLRLMGMKGLTLYHLKSHLQKYRLGKQSKKDTGLEASRGAFAAQG
INFSAPVPPTIPSSAGNNTGETPLADALKYQIEVQRKLHEQLEVQKKLQM
RIEAQGKYLQTILEKAQNNLSYDASGAANLEATRSQLTDFNLALSGFMDN
VSQVCEQNNGDLAKAISEDNLRASNLGFQLYHGVHDGEDGKCTPDEGLLL
LDLNIRGGYDHRSAADLKMNQYMR
>Pgl_GLEAN_10031638 PgMYB71
MDLELQLLWTGPGNEKHLDQCIGVFDDHCSQQVVMFNPNFGLQEPSASGG
RKHGRKNNDHWTQDEVRLLVHGVSEYGVGKWKDLKTKYFFASIRTPAHLK
DKWKNLVKACKKESGRMLLPLEEALIERITEIDDDNPYPKQSNNIHRLAP
TTTSPDLLSELPRAGRWSVVKARKNRMAQHAYHALSSNGSSASPGRPPAP
RNKQVALISTRALS
>Pgl_GLEAN_10012406 PgMYB72
MGRSPCCDENGLKKGPWTPEEDQKLMEYIQKHGHGSWRALPKLAGLNRCG
KSCRLRWTNYLRPDIKRGKFTQEEEQTILRLHSVLGNKWSAIAKHLPGRT
DNEIKNFWNTHLKKKLIQMGFDPMTHRPRTDFFAALPQLIALANLRQLVE
QRPWDDHAARLQVEAVQAAKLQCLQNLIQSAASIATSPSSSSINTIPDLE
QIGLLSPPQMSSLSSLPSPSFMDSISGQDIVAGQVPDIQIPSSFFEQPTS
NDANQNSDFTPKSSVEGENGTPKTLLLSENSLPPLTDFPISNFADACSVS
SCDGSSIQFPSWPELFDEQFLSEFV
>Pgl_GLEAN_10012225 PgMYB73
MGRQPCCDKVGLKKGPWTAEEDQKLVAFLLSHGHCCWRLVPKLAGLLRCG
KSCRLRWTNYLRPDLKRGLLSEEEEALVIDLHAELGNRWSKIAARLPGRT
DNEIKNHWNTHIKKKLKRMGIDPVTHRPLSPAPQASDPPHVDGIMDMDWA
GILSGCGDDGAGVDVDLFDHYPGDGFDQQVWM
>Pgl_GLEAN_10008203 PgMYB74
MGRGRAPCCAKVGLNRGSWTPQEDMRLMAYIQKHGHANWRALPKQAGLLR
CGKSCRLRWINYLRPDLKRGNFTVEEEETIIRLHGMLGNKWSKIAACLPG
RTDNEIKNVWNTHLKKKAALREQQEACAAKNGGAASGDDASTPVTASSSA
SSSTTTNNDSSGGSDSGDQCGTSKEPDAVDVSDLLLENIDVSDMLVDAPM
ASAAAAQPMLSSSCSSSSLTTTCIGGGVDELIELPVIDIELDIWSIIDGE
SADASGGVRHGDATAPCTGGAISLTTGEEEAANGWLENLAKELGLWGPVE
DLQAQSDLLDHTGLDPLVDSAGDPVSTYFQTGPANAETEFLDVELQPSSS
AVPL
>Pgl_GLEAN_10027659 PgMYB75
MATDEIAVAVRAGGEAETAVDHSKDPLDPGDMDLSGEEHVPKARKPYTIT
KQREKWTEDEHKRFLEALQLHGRAWRRIQEHIGTKTAVQIRSHAQKFFTK
VVRESSATGSNTAGGAAPVIQIPPPRPKRKPAHPYPRKVDGAAKKNVPVL
KHLERPSLRTQSLRDQDDGSPTSVLTTARTVLRADALGSVFANSSSGSRS
PAPSATASDEHGDGGGSPASSVDREDGSVSPSVATAELAARTADTKVFGD
RKVSCTGTEDSSVFKLFGNKVTVKDPLEHLTTDASPASVAQATRNPTPFG
AAEGSSWNPWPTGVQVQQLMYFVPQPDGFAAQSAVPWLAYNGTLPCALFY
PQAAVAPSAQQHRSSQPSEPLDHKRVQREGSLTGSNTASSGVPAASAAQN
SDAAESHGPGQETTSDGDAAPAAAAVAVQRLTKWPSSASFSRSGFVPYKR
CAAESEAPRPMAAGEEADGELTRLCL
>Pgl_GLEAN_10027682 PgMYB76
MVSASTPPPTQPQSDAAGSGEDASKKVRKPYTITKSRESWTEQEHDKFLE
ALQLFDRDWKKIEAFVGSKTVIQIRSHAQKYFLKVQKNGTSEHVPPPRPK
RKAAHPYPQKASKNEPNYGLKTDSSSIHRNSGMNATVSSWAVSSIPPVVA
SSMVKVMPDFAQVYSFLGSVFDPSTSGHLQKLKEMNPIDVETALLLMRNL
SINLTSPDFEDQRKLLSSYSTSGGLELGSSRSSALATSAPFM
>Pgl_GLEAN_10029306 PgMYB77
MGRAPCCDRTKGLKKGPWTPEEDKLLVDYIQANGHGSWRMLPKLAGLNRC
GKSCRLRWTNYLRPDIKRGPFSPEEQKSIVQLHAIVGNNSDIGDSFRRKT
AATPAPVRRKDDVVMIKKEALALPAPGEDPSAASNEMEVAEALEEYQMFL
DFAGEELGLFHGRYGGFSLFPPLEVLEASLDTAF
>Pgl_GLEAN_10029303 PgMYB78
MGCKACDKPKPNYRKGLWSPEEDEKLRDYIVRYGHGCWSALPAKAGLHRN
GKSCRLRWINYLRPGLKHGMFSPEEEETVMSLHATLGNKWSRIARHLPGR
TDNEVKNYWNSYLKKRVEGKEAPSSSTPATTTSSGADSEDSQSHGGASCW
EFQEHFDGIDQISTTAFCDLLSMSDYFGLN
>Pgl_GLEAN_10008396 PgMYB79
MGLKRGPWTPEEDRTLVAHIERHGHSNWRALPKQAGLLRCGKSCRLRWIN
YLRPDIKRGNFTREEEDAIIHLHTVLGNRWSAIAARLPGRTDNEIKNVWH
THLKKRLEEPKPATQQAPRRKQPKKQQQQQQPPAEIVMLDGPTAPVSSPE
QSSLSTSTTSSTDYSAASSVENNADSSFTSEEDYQIEDSFWSETLAMTVD
DGSDSFGMEMREGDACAATAPSANDDMDFWLKLFMQASDMQNNLPQI
>Pgl_GLEAN_10027268 PgMYB80
MEGQFGWGREEGGWRKGPWTAQEDKLLVEYVRYHGEGRWNSVAKLTGLKR
SGKSCRLRWVNYLRPDLKRGKITPQEESVILELHALWGNRWSTIARSLPG
RTDNEIKNYWRTHFKKGKPSKNIERARARFLKQRREMQSQLLLQQQQGQY
DDQQQRQVGHDHDHDDEAVVGETASSPAVSLATQQHEEDLRMLLEQDMDD
LLFQFCPMMASCTSSSCGLLPVATTATASASASDEGSSGDYQLDGGAATW
GWGGSLWNLDDVVDDVVVDGGWDWDTSSYPLLQDQGLAFY
>Pgl_GLEAN_10024409 PgMYB81
MGRSPCCEKEAGLKKGPWTPEEDQKLLTFIEQHGHGCWRSLPAKAGLRRC
GKSCRLRWTNYLRPDIKRGKFTLQEEQTIIQLHALLGNRWSAIATHLPKR
TDNEIKNYWNTHLKKRLAKMGIDPVTHKPRADAPGVAARAHGLLTPRSYG
EAFGEHAAAQGFLAGVLLDCSAAGEEQTRFAAASTTDASVGDLQQEEEEE
DKGYWSSILNMVNSSMSSSSSSVTSDAVTDPAMYFPAAAEF
>Pgl_GLEAN_10030848 PgMYB82
MEEIGPVSDLDFDFTVDDINFEDFFLRLEDGDALPDLEVDPAEIFTDFEA
IATGSDGVMDQEVPSVQPLTDAVHSLDALDPCSVVLGEDNTTRADVEEGK
GECNHAEEVVQGNGVFGDGGGTVFPEEKSLSSTTSSSQEAESQHKSSSKY
LQGKKKSKVDWTPELHRRFVQAVEQLGIDKAVPSRILEIMGIDSLTRHNI
ASHLQKYRSHRKHMHARKAEAASWTQRPQMYAAGGTSTAVKRSDSNTLTV
PTIGFFPPPPPPPPHYGRPLHVWGHPTQGVELPRAQMWPRHLISGAPTPA
WAPPPPSHPAFWHHPYMRGPGHIPMPMPAARFPTPPVSGVLPCPPPMYRS
LIPPALANKSQQDAHLQLQTQPSSESIDAAIGDVLSKPWLPLPLGLKPPS
VDSVMDELQRQGVQDVPPACG
>Pgl_GLEAN_10033508 PgMYB83
MGEEKQKVVMEIVLDDDEKGSSENSVPPAVLDLNEGFGEGSDGWVVVSED
DDEEEDDDDFEGGSTSEVAGEGRSSSNSSTTNHNSRSNKDHDMNSRSKGE
GSGERAPAVRQYNRSKLPRLRWTPDLHMAFVHAVERLGGQERATPKLVLQ
MMNVRGLSIAHVKSHLQMYRSKKLDHESGHERAGISSGSHLDPLSPFLLV
>Pgl_GLEAN_10003205 PgMYB84
MGGGGGGGQRWQKVLNPELVKGPWSKEEDEIIVQMVNKYGPKKWSTIAQA
LPGRIGKQCRERWHNHLNPAINKEAWTQEEEITLIHAHRMYGNKWAELTK
FLPGRTDNAIKNHWNSSVKKKIDSYVSSGLLSQVPCLPLIECPSQCNSLS
TMNLQNNGDSGCNAQNTNLAMSCDIQENMDANKSEAQDSHSSMCQGACYT
STEAVGSTLPEGHHHLSSSFSQRLDLQMDVHEGSGNSMFVDEQTLCSTSK
QENSMVPFGVAQEMPVSVLSSVSDAEQKLHLISDADSLKSELWKDVSLQT
LISGDTVDADSSSGLNQLPDTSKTDTNFLAQSYTLHTSNPSSVMETPYEP
STLVTVPPSFLCLDSLPGAPGNRSQPMEILDSEAEVITCSNNSFCDAEQS
AKPGSSDDIPEDFTMIENNTNCRSKQSTEAEEAVASTAKEQLPKDTEPVP
DEKTGEGALFYEPPRFPGLDVPFISCDLVTSADLQEFSPLGIRQWMRSTM
NVPTPLRLWGSPSHDESPDVLKTSAESFPCTPSIMKKRHRGLLSPTPDKR
IEKKSGIAKEMTDISYTITATCSMNATKDEATVTESLVCAEQSSCKHLDK
KFEFSDGNKENFDGAPEQARDAQNAGNKQLVDEGGQQCSVNVANPNTDLP
DNSQPVGILVEHEHNSSDPIATGYGAKPGCLSFCKEAVNSKSKPADLVVE
KSSPCINADYEYVNLLADTPGVKRGLESPSAWKSPWYIDMHMHFQGFVSP
ADRTYDALGLVKQISKHSAAAAVEACEVLASGSRPSDEENKENTDDKGPG
TRKSQTKSMAEGRVLDFDEYTTPARTADKRLSSCLGRSVSSPIFSSPNLR
SFR
>Pgl_GLEAN_10009766 PgMYB85
MGRPPCCDKANVKKGPWTPEEDAKLLAYTSTHGTGNWTNVPQRAGLKRCG
KSCRLRYTNYLRPNLKHENFTQEEEDLIVTLHATFGSRWSLIANQLPGRT
DNDVKNYWNTKLSKKLRQRGIDPITHRPIADVMHNISVLAIRSTQPAPSH
NGSSSYLHSAALPLVHDVKYHAAGMLPPPQQQAVIARQILGQYHHHHDAA
MAAPGGGVLAAGSSSAGGGDDGAAAFIDAILDCDKETGVDQLIAELLADP
AYYAGSSSSSSEMGWAAD
>Pgl_GLEAN_10038634 PgMYB86
MRIMIKGGVWKNTEDEILKAAVMKYGKNQWARISSLLVRKSAKQCKARWY
EWLDPSIKKTEWTREEDEKLLHLAKLMPTQWRTIAPIVGRTPSQCLERYE
KLLDAACAKDESYEPNDDPRKLRPGEIDPNPESKPARPDPVDMDEDEKEM
LSEARARLANTRGKKAKRKAREKQLEEARRLASLQKRRELKAAGIDTRQR
KRKRKGIDYNAEIAFEKRPPPGFYDTVGEDKPPEHVQFPTTIEDLEGKRR
VDVEAQLRKQDIARNKILQRQDAPAAIMQANKLNDPEAVTKRSKLMLPPP
QISDHELEEIAKMGSAGDPALAEELGEGSTATRALLSSYSQTPRLGMTPL
RTPQRTPAGKGDAIMMEAENLARLRESQTPLLGGDNPDLHPSDFSGVTPR
KKEIQTPNPMATPLALASPGPGATPRIGMTPSRDGNSFGLTPKATPFRDE
LRINEDVELHDSAKLELRRQAELRKSLRSGFASIPQPKNEYQIVMPPITE
DEKEEAEERIEEDMSDRLARERAEEQARQEALLRKRSKVLQRSLPRPPAA
SVEVLRQSLIKGGESRSRSTFVPPTSLEQADDLIHEELLRLLEHDNAKYP
LDEKTQKEKKKGNKRQANATAVPEIEDFHEDALKEASSLVKEEIQYLRVA
MGHENDSFDDFVKAHDACQEDLMYFPANNSYGLASVAGNADKISALQNEF
EIVKKRMDDEAKKASRLEQKIKLLTQGYQVRAGKLWSQVQDTFKQMDTAA
TELECFQELQKQEQLAASYRVRNLTEEVDKQKALERTLQSRYGDLLSIYH
RMQEQLEEHKVQLRKQEAIEAENRAREEAAAQNRADEEENERTRNVEEGK
EQTNSVPDEVPAGSKQINEDQMDVDTSNVDGEFVGPIPPAPDTQGDSTEA
CGQESSSNAQSGDDVTTNGEACDMVNASKLESQGNSNGSLPVDAGNQEDD
KSNLPLVGANEGNTALSSDGGDAVTDE
>Pgl_GLEAN_10010553 PgMYB87
MGRSPCCDKEGLKKGPWTPEEDQKLLAYIEQHGHGCWRSLPAKAGLQRCG
KSCRLRWTNYLRPDIKRGKFSLQEEQTIIQLHALLGNRWSAIATHLPKRT
DNEIKNYWNTHLKKRLAKMGIDPVTHKPRSDAAAVAARAAMQPMQAYEEA
CKEHEEQQQQQQQWGDHVVHAADAAAFAGVGFTGLLLDGALNQQDLRPAA
ARHGADDDAGLQETEEEKNYWDSILSLVNSSSVSLPTSSVAVPTTEGYSS
SASLTTSAVVIAPEAYSSSTSLATSVAMPTPEAYSPAPEF
>Pgl_GLEAN_10000886 PgMYB88
MSPPAAATSGDGPPSSPRELYTIPASSGWFRWDGIHETERGALPEFFGGA
GGAGFGTATRNPRIYREYRDFIIARYREDPSRRLTFTEVRRALVGDVTLL
RKLFAFLDTSGLINFSASSSSGPASRQQEVGVVVEAPVGLQVTPRPPASY
FAEEKRGGAGGERENGFRLPPLTSYSDVFGEWAPGKAPVCGFCGKECGDE
TIETLQDGFKVCSKCSKSNNDNTEEANRCPGDKKESMNIHASSAWTDAET
LLLLEGVLKHGDDWDLIAQHVRTKNKSECIARLIQLPFGEHMLGTINGKS
VNRLHMNQATDGKMNQHIMKESSSNSTEMVDDMQIDGNEDSADKSVEEHP
TKRRRLFFSMDATTSLMEQLALLTTSSSPDVVAAAADAAIKALSDENPQA
RKAFHLSEQEFKTKAFASNHVQQIDRKVSNKDVEMHGWTGSDKKQEKKST
ANAYQVRAAVATAIGLAAARAKMLADQEEREMELLMASIIETQLRKMQYK
IKHYEELESVMELEHATMRQMKGSLMNEWLKVLEQAIRTGVSVPRDELLI
KLFLNQSTA
>Pgl_GLEAN_10012731 PgMYB89
MGRVPCCEKDNVKRGQWTPEEDNKLLSYITQYGTRNWRLIPKNAGLQRCG
KSCRLRWTNYLRPDLKHGEFTDAEEQTIIKLHSVVGNRWSVIAAQLPGRT
DNDVKNHWNTKLKKKLSGMGIDPVTHKSFSHLMAEIATTLAPPQVAHLAE
AALGCFKDEMLHLLTKKRPTDFPSPADDFRYDTGTVPDYVLGGGAGEADQ
GTSMWSHQSLYSGSSGTDAAARPAPALPEKGNDSVGSSGGGDEEADNVKD
DGGKGDGSDMSGLFGSDCVLWDLPDELTNHMV
>Pgl_GLEAN_10018370 PgMYB90
MEDAPLGWGRQEVDGWRKGPWTSQEDKLLVEHVRQHGDGRWNSVSKLTGL
KRSGKSCRLRWVNYLRPDLKRGKITPQEERIIVQLHALWGNRWSTIARSL
PGRTDNEIKNYWRTHFKKGKPSKNIERARARFLKQRQEMQSQKQQLLLQQ
MGQVAKDDNEEYGGARASVPAADDDDRGSVXPMSCALLLHGAVVQGGAGT
GSCCGSTASDEYGSSEEDGATWGSLWNLDGVVDDGACTLW
>Pgl_GLEAN_10035636 PgMYB91
MGRAPCCEKMGLKRGPWTPEEDKVLVAHIQRFGHGNWRALPKQAGLLRCG
KSCRLRWINYLRPDIKRGNFSKEEEDAIIRLHEELGNRWSAIAARLPGRT
DNEIKNVWHTHLKKRLEPTTEQEEEGGERCRRRRAGVVARTGNTGSSSLF
PKEESFTSSAPDAEEFQFDESFWSETLSMPLESFDIPMEPLDAFGAAATS
SAVGAADDMDYWLKVFMESGEVHQELPPI
>Pgl_GLEAN_10003061 PgMYB92
MGRTPCCDSKGIKKGPWAPEEDKLLVDFVQANGPGNWRMLPKLAGLNRCG
KSCRLRWTNYLRPDIKRGPFTPEEHNSILQLHAVVGNKWSMIAAQLPGRT
DNEIKNYWNTHLKKQLRQEALAGADAAATQQLALAADDYHAFLELAVEEF
ALLHGRLGGASSFSEFTPADAHVLAEASCLFTPFE
>Pgl_GLEAN_10003063 PgMYB93
MGCKACQKPKVQYRKGLWSPEEDEKLRDFILRYGHGCWSALPAKAGLQRN
GKSCRLRWINYLRPGLKHGMFSQEEEDTVMGLHARLGNKWSQIARHLPGR
TDNEVKNYWNSYLKKRVEGGAQANLATLGSDAGVFNVSGRSPGGQGLNHQ
GSVQVDGPCGAVDSLHGLGDGGICGWGFDDAAADHQMDVQGGGFCDLLSM
SEFLGIN
>Pgl_GLEAN_10033575 PgMYB94
MARAPSGGRRRGSRRDAAGGGEGVRKGPWMAEEDAVLLEHVRAHGPCDWS
SIRSKGLLPRTGKSCRLRWVNKLRPNLKTGCKFSADEERVVLELQAQFGN
KWARIATYLPGRTDNDVKNFWSTRQKRLARLLRAPLPGPSSRSTRAKQAL
AASTSSLQSRPSAVGPSDRVPECSSSGVHPCSAATPFMNAQNAVPYDQAA
GSRLVGFNGALLPFAPAIDSHSCSSSSNAAPLQTKLPFDEPPYPLLDYPG
IPEGWSMAPGGFINAGAMDDLAYQELLPMVTQPAPMIFPFFGTGCAQGGV
KAEPPDAPDFFDDLPPDMFDSFDQLPPPWSPPATSSGF
>Pgl_GLEAN_10015401 PgMYB95
MGRRPCCAKEGVKRGAWTSKEDDILIAFVKAHGEGKWRDVPQKAGLRRCG
KSCRLRWLNYLRPNIKRGNISDDEEDLIIRLHKLLGNSAPCFSGGGDWMD
DVRALASFLESDEE
>Pgl_GLEAN_10018049 PgMYB96
MGGGGRNGAVRQYIRSKEPRMRWTADLHRSFVRAIECLGGQDKATPKLIL
QFMGANGLTISHVKSHLQMYRAERLGGARRGMQAAQLQRRHSCTVDEQGP
KELLCPPLKRARMGTAAAYESMQGSHGISEARTAAAAAVYRMDDYSMQAM
ATRRRIKEEGRRWQGRDAAAAAAASSLPAVGCLVQESDPFKISRPEANHP
VLAPDQKQGSVADGNGNGNGRSLFGSFSTAAKDETPEQCSLSLSLGLEPN
NCTRAMVASSPSESSCILTASPARRSSSDCSGHSDRFAGPGLSLELSLAT
CGF
>Pgl_GLEAN_10022511 PgMYB97
MAPFQEIKATSDQRPAADRAGHGNCMDHLKNALNSGAIDLPEGARAPKAR
KPYTISKQREKWTEDEHKLFLEALQQHGRAWRRIQEHIGSKTAVQIRSHA
QKFFSKVIRESFGDSNSIAAPPQIQIPPPRPKRKPSHPYPRKLGNSLRKD
ASAIKQLEKPQLKVQSLSEQENCSPKSLLTTAQIGSEILALEGSGSPASS
VYMEEKCLTPSTSVEELGVQVALSKDATTSDGAACGMREGPVLRLFGKRV
VVNNLHEQPISNTANLQHVAHMELDSSAETPTSGTGKVPSHGAEEAKKWS
PWLTGTQQFMYYLPQGEVLSFHSACQFLNYGNGSISYRVLSPQTVTSDKQ
QHQPSQPADCKFTRAEGSWTESMTTSNSVPETTPQSSESVESTQVNSNED
EVITVPGSRKYSTAPAYLQGFMPYKKCTAQSKMLQALVPGEEADGEMTRL
CL
>Pgl_GLEAN_10023805 PgMYB98
MGRSPCCCHDAGVKKGPWTEEEDRALVEHIQRHGGHVGSWRNLPKAAGLN
RCGKSCRLRWTNYLRPDIKRGNFTDDEERLIIRLHAELGNKWSTIATHLD
GRTDNEIKNYWNTHIRKKLLRMGVDPVTHQRLPPDDILSGXRSSRRRSAS
EASTAS
>Pgl_GLEAN_10023817 PgMYB99
MGKGRAPCCAKVGLNKGSWTPEEDMRLIAYIQKYGHANWRALPKQAGLLR
CGKSCRLRWINYLRPDLKRGNFTAEEEEAIIKLHGMLGNKWSKIAACLPG
RTDNEIKNVWNTHLKKRVSPGAEERGAKKKRKKPSGAGVPAAGPSPSPSS
STTTATTTNCSSGDDSGEQQSNASKDDEPAGDELGLELEKLEMIPMLDDP
ACFDFDMLVDHAPGPYCPAVSVSVPTSPCASSTIIDGDGTGGAVAVGTAP
APCQSNATEPNAAASTTTTSHGGAEWWLEDLEKELGLWDPMDDDYQYPMM
MGPQCPVAHPDPLPAMVEDDPVSCYFQAGPAPPAAMLQEPAAGYSAVVAS
SNQMGF
>Pgl_GLEAN_10004210 PgMYB100
MSRDPKPRLRWTPDLHQRFVDAVDKLGGPDKATPKSVLRLMGMKGLTLYH
LKSHLQKYRLGKHGKKSTGPELAKGSGYAAPCLSFHTPAPIPGVPTEGKN
TGEMPLADALRYQIQVQRKLQEQLEVQKKLQRRIEAQGKYLKAILEKAER
NISSDANAPSDNIGSTRSQLMDFNLALSGFMDNATRVCEENNEQLVKALS
DDNHKDNNLGFQLYQIGSHEAKEVKWTPKTGDSLRLDLNIKGSYDPSSRG
MQTCELDLKINEQMI

>Pgl_GLEAN_10031939 PgMYB101
MAPPDEGASAAVVPPMAGAVQPPVARKSAWTKHEDDTLREQSCRLRWCQH
LNPSVDAARPFSREEDEKIVGLHRLFPSKWATIAGFLPGRSDNAVKNRWN
SVLGKQQRPPQQQRPIIAAPIRRLSYVTLPLFPLAHGDVRPFGRGIYDTS
SATTRRQATRAGVDLSESDACLKLFPLAPGDLVGDSNMDVDCGADDPADT
EMTLWPSSRATSMAAFKAMVQAVRAP
>Pgl_GLEAN_10031924 PgMYB102
MMNAKKIKLHDHHFGSPLYDPQMFSTTTAAELSFHPGLVGSLPQQHGGWL
QEDCSPTPRTVLATQGTCVGSDPAAFFAAEHLLGMPRFDCPLGSTALSAM
TATKTAAPFVRSPEAEQLYRPLDPLLLRDGSVRTYYVRPQQRDATEAPPA
LKLSLQQQQQHERVHGLYGNGSTGRLMLGGGGGEPKAPSFLPHVTANTHT
LIQGMESPGMQSSIENTLSRSCSIGSPVTHAGNVVAAAGHVAPSKTRIRW
TQDLHERFVECVNQLGGADKATPKGILKLMNSDGLTIYHIKSHLQKYRIA
KYMPASTSEGKQEKRAGANDAQNLDPSTGMQITEALRVQLDVQRRLHEQL
EIQRNLQMRIEAQGKKLQKMFEEQLKASRTVMEPTEEEEELQLRDAGGVG
ASAAFPGVGEQEGEDDAFDDVQLLSVASTGYNDARFPSKIS
>Pgl_GLEAN_10031849 PgMYB103
MTVVEEASSSGGEEGGSGAWTREQEKAFEKDADGGDARWEKIAAAVEGKT
AGEVRRHYELLVEDVEGIDSGRVPLPTYSADCGAAEEGGGGGGGKKGSGG
GGGGAHGEKGSAKSAEQERRKGIAWTEDEHRLFLLGLEKYGKGDWRSISR
NFVISRTPTQVASHAQKYFIRLNSMNRERRRSSIHDITSVNNGDAAQGPI
TGQANGQAPNPGKPSKQSPQLATTPPGVDAYGTTIGQPVGGPLVSAVGTP
VTLPVPAPPHIAYGMHAPVPGAVVPGAPVNIAPMPYPMPPPSSHG
>Pgl_GLEAN_10005856 PgMYB104
MRTTIKGGVWKNTEDEILKAAVMKYGKNQWARISSLLARKSAKQRKARWY
EWLDPSINKTEWTREEDEKLLHLAKLMPTQWRTIAPIVGRTPSQCLERYE
KLLDAACVKDKNYEPNDDPRKPRPGEIDPNPESKPARPDPVDMDEDEKEM
LSEARARLANTRGKKAKRKAREKQLEEARRLASLQKRRELKAAGIDTRHR
KRKRKGIDYNAEISFEKQPPPGFYDTVGEDRPLEHVQFPTTIEELEGKRR
ADIEAQLIKQDIARNKILKRQDAPAAIMQANKLNDPEAVTRRSKLMLPPP
QISYLELEEIAKTGNAGDPGFTEELGEGLTATRTLLGSYSQTPRLGMTPL
RTPQRTPAGKGDAIMMEAENLARLRESQTPLLGGDNPDLYPSDFSGIKPR
KKEIQSSNTMATPLASFGPGATPRIGMTPSRDGHNFGLTPKGTPFHDELR
INEEVELQDGTKLELRRQAELRRSLRSGFASIPQPKNDYQILMPHIAEDE
KEEADEKIEEDMSDRLARERAEEQARQEALLRKRSKVLQRSLPRPPTASV
EIIRQSLIRSVESRSRSTFVPPISLEHADELISWELLRLLEHDNAKYPLD
KKTQKEKKKGSKHQQNGGPLVPEIDDFDEDELKEAASVVEDEIQYLRVAM
GHGNGFFDDFVKAHDACQEDLMFFLTNSSYGLASVAGNADKISALQNEFE
IVKKLMDEEAKKASRLEQKIKLLTQGYQAWAGKLWSQVQDTFKQMDTASA
ELECFEELQKQEHFAASCRILNLTGEVNKQKALERTLQSRCGDLLSGF
>Pgl_GLEAN_10015286 PgMYB105
MGRSPCRCCQDGADVKKGPWTEEEDRALVDYIQRHGGHAGRWRNLTKAAG
LNRCAKSCRLRWINYLRPDIKRGNFTDDEERLIIGLHAQLGNKWSAIATH
LDGRTDNEIKNYWNTHIRKKLLRMGVDPVTHQAPAAAPGDVVGSTSASAA
LSPPPPPPASQRSSSRRWPASEASTAS
>Pgl_GLEAN_10021819 PgMYB106
MKERQRWRPEEDAVLRAYVRQYGPREWHLVSQRMSVALDRDAKSCLERWK
NYLRPGIKKGSLTDDEQRLVIRLQAKHGNKWKKIAAEVPGRTAKRLGKWW
EVFKEKQQRELRDSRRPPPEPSPDERGRYEWLLENIAEKLVGERPXXXXX
XXXXXXXXXXXXXXXXXXXXXXXXXXXXXXXXXXXXXXXXXXXXXXXXXX
XXXXXXXXXXXXXXXXXXXXXXXXXXXXXXXXXXXXXXXXXXXXXXXXXX
XXXXXXXXXXXXXXXXXXXXXXXXXXXXXXXXXXXXXXXXXXXXXXXXXX
XXXXXXXXXXXXXXXXXXXXXVAELRRDAQLKEEKMAEQWAAKHARVAKF
IEQLGCSRPWSAPSDMN
>Pgl_GLEAN_10007729 PgMYB107
MVTVREETRKGPWTEQEDLQLVCTVRLFGERRWDFIAKVSGLNRTGKSCR
LRWVNYLHPGLKRGRMSPHEERLILELHARWGNRWSRIARRLPGRTDNEI
KNYWRTHMRKKAQERKRNMSPSSSSSSLTYQSCYPDTPSTIGVEGQELHG
GSGCITSIMKGTPPDMDVYPMDQIWMEIEAPDVPSSMGLDGGSENACSSL
AAPLLPPAAWDYYPESGWKMDDEIKMAPQFSYSEGVGPCF
>Pgl_GLEAN_10026254 PgMYB108
MASGGQPQFWYMQPPSKVLHLRNLPWDCTPELVELGTPFGKDLKKYKLGD
PSSFHYLNQSACIKVDGINDTEEYLVTRKAMDNVGITEQEQVQNSSSLSS
VTNCSSNVDVGSVHQTWRHPRPALLSSSTTTTAASTEGRRRRRRSSWTLD
LRRGPWTVDEDLTLVNYIADHGEGRWNSLARAAGLKRTGKSCRLRWLNYL
RPDVKRGNFTADEQLLILDLHTRWGNRWSKIAQHLPGRTDNEIKNYWRTR
VQKHAKQLNCDANSKRFKDAMRYLWMPHLVDAAAADDHHRRRLLHHTHQI
HPLQRDLTLIGRHVVETAANQGLWTAAADHQSSAAAVQAAAVGGGCQQFQ
DPELSGWVQGFSEGGITENFWALEDIWKIQ
>Pgl_GLEAN_10025439 PgMYB109
MRKPEGPAAASGVYNGGAVAAAKLRKGLWSPEEDEKLVAYMLRSGQGSWS
DVARNAGLQRCGKSCRLRWINYLRPDLKRGAFSPQEEDLIVSLHAILGNR
WSQIAARLPGRTDNEIKNFWNSTIKKRLKINSSSASSPATATDDCASPPE
PSSSKVAGGIDISGAASCPDLAGLDHHYHHQDGSVHHHAMLTTGLWMVDS
SSSTSSSTSPMQSRPXXXXXXXXXXXXXXXXXXXXXXXXXXXXXXXXXRG
GTAAADTSPPAGFFHGHHPAPFKHQAAALASLHGGGGYYGNGMSTPHHHG
MTMATEGGGGCFMRGEGLFGVPPLLDAMSAQDQQEAGQQALMAPSGGGNS
NPKNHSISNNTTETATTTTTTTVSNNESNITDNTTKDNKNINTMSLVNSS
VAAAAVYWEGAHQQYMSRNAMHGEWDLEELMKDVSSLPFLDFQVE
>Pgl_GLEAN_10030874 PgMYB110
MPQDSRPAGMRLFGVTIAPAPXXXXXXXXADPPDRDPSPNPPMAVREDVM
RKCKSMGNLAALGAGADAGGAGADGGGAGDGYLSDGGLMQSSGKRRRAQE
RKKAVPWTEEEHRTFLAGLEKLGKGDWRGIAKNFVTTRTPTQVASHAQKY
FLRQTNPNKKKRRSSLFDMMPSELSPVPNCPILPPSMTKVHDVVAMTRQL
QNSNLEGGSSSNAANIAPQVGRDLPPVPSFRATNMDSSFSKLNRMEPFWR
TPYPFRPIPKAPDGTSSSTSVATNIATPVAKANPTACTSTFLSLRSDTSP
LPPKADSPAETKDLELTVAPPSQQNMTNMSSQNAVGVIQVI
>Pgl_GLEAN_10030875 PgMYB111
MGHHSCCNQQKVKRGLWSPEEDEKLIRYITTHGYGCWSEVPEKAGLQRCG
KSCRLRWINYLRPDIRRGRFTAEEEKLIISLHAIVGNRWAHIASHLPGRT
DNEIKNYWNSWIKKKIRKPAVSTTTTTTSSSLTAATSPPCSTAASEALAL
GHLQTPFSAVAEQQLDALISQSCLALPPKLAGGQDSPPAPALPPHCPFFM
FDTSSVSPPSSLTSPVAQLVQQHPFLTFTAAAMDGPGYQLPPLIDGMGMG
MTTAMDCGLGGEESRGNNDQSTAAAMANGGGGWQQQKQEEEEQLGHDQWD
DESAQHLLMWDDDQELTPSNLEAMESGAHSLLFMGPNDHA
>Pgl_GLEAN_10027372 PgMYB112
MSGETVIPFGCLWGDLGGEAWTEEEHKKFLLGLNKLGKGDWRGISRNYVI
SRTPTQVASHAQKYFNRQTNVHRRKRRLSLFDMVIDDSSDQLPLSRSSSQ
EVEQHLDDPQPVAALPAPVVSTAAVAPPPVSVEAPASIPPPVQVPPEVTP
QLMEQDSVPSSSTAGEAGVVMPEGMPPYLYPMMIPYQPAFVPVPCYGYVP
IYYAPPGASQAPHQVVKPVAVHSAPPLNVKDLYNMSELSLKGDDSNANSG
VPASPLPPKPIGRPGRQSAFHGKGPSGGSSGELIPAVK
>Pgl_GLEAN_10023931 PgMYB113
MDSMSWGLAEDDVVVGMGRRVTATGSIQMEVNSSGEETVVKVRKPYTITK
QRERWTEAEHKRFLEALKLYGRAWQRIEEHVGTKTAVQIRSHAQKFFTKL
EKEAMNNGTSPGQTHDIDIPPPRPKRKPNSPYPRKNGLSSETPTKELPND
KSSKSNITLSNGNVQLVGDTSLQKFKRKEVSEKGSCSEVLNLFRDAPSAS
FSSVNKSSSTNNVPSEPTKTEIRDMTTKEKNSSNPTMQEDDVKEINVPEI
GRVNGIHFSSKCDRSNEEYLDFSMQQMKLKPKSSETTYEDKQTARTSHSV
VERNGATSIPVTGTEGTRPDQTGDQVGVNGNMNPCIHPTLSTDPKFDSSA
TPQPFPHNYAAFAPMMQCNCNQDTYRSLVNMSSTFSSMLVSTLLSNPTIH
AAARLAASYWPAVEGNTSVDPTQENPAEGVQGRNLGCPPSMASIVAATVA
AASAWWATQGLLPFFTPPMAFPFVPAPSAAFPTTDVPQPLDRDRDSPVEI
AQKGCQEAQKQGQSEVLRIAVSSETDGTRKGDMSLHTELKISPVQNADAA
PTTGADMSDAFRNKKKQDRSSCGSNTPSSSDVDAGNVPEKEDKDNDKAKQ
ASCSNSSAGDTNHRRFRSSGSTSDSWKEVSEEGRMAFHALFSREKLPQSF
SPPQAEESKEVAQEEEDEVTTVTVDLNKNATTIDHEVDMMDEPKSSFPNE
LSHLKLKSRKTGFKPYKRCSVEAKENRVPASDEVGTKRIRLESEAST
>Pgl_GLEAN_10031352 PgMYB114
MGRAPCCDKATVKKGPWSPEEDAMLKNYIEEHGTGGNWIALPHKIGLKRC
GKSCRLRWLNYLRPNIKHGDFTPEEDSVICSLYISIGSRWSIIAAQLPGR
TDNDVKNYWNTKLKKRLLGRRKDRHHQSAAAAAATTEMSTESANDGGERA
LSASAMERIQLCMQLQELHQNPLVGGGAAHHHNPAPVAWPSAAAAGTLSN
NSSFNSNSSSVTVAEHGPSSSMMNEHLMMSAQLEGGGAAAAAMDGLGSPS
SAGNSNVISMEAELEELLYGEGNYQGKGGADAVDGGGVPQQGDVDWWSYD
QGKLPVGSWDFAAEANAVFQDYTSVYDI
>Pgl_GLEAN_10035466 PgMYB115
MGRAPCCDKNNVKKGPWSPEEDAKLKEFIEKHGTGGNWIALPQKAGLRRC
GKSCRLRWLNYLRPNIKHGEFTEHEDRVICSMYASIGSRWSIIASQLPGR
TDNDIKNYWNTKLKKKLLGSTAAPPPHRVPRQHHRSLNLMLQHTSLSLPQ
PTYNSFFSGAGVLHDPISIPALNLSPTQDYMLNSSVAMENAPSLLQGHGA
TQQQFHHHVVKEESGSMIVFGSDQQSCSSSDGAHSQPQFGHGKELRFDSY
FGYNNGSIEHDHRLLQLQDHHHQAEAPVEYNYEEIKQLLMSSTTGNLHGH
GQDGGMEGFGSQGKVTMM
>Pgl_GLEAN_10011393 PgMYB116
MKQRSGSGEQAAVRKGPWTAEEDEVLLRHVREHGPREWSSIRSKGLLPRT
GKSCRLRWVNKLRPDLKTGCRFSAEEERVVLELQAQFGNRWARIATYLPG
RTDNDVKNFWSTRQKRLARLLRAPMPRRRPGKQSSGASSSHAYDYKLPAP
KNPCLEMIPFQETAAHHIGEGSSSSSSREPNAASQHAGPHFPMSYCLPPP
PIPLPIMYAGAEGGSSGAAAPTPTTALLLPYGSGTRSPVNGVDPLVFLDP
ADSPEPLEVVPPGQFFDLDDVYVHAGRAPDRDMFGVRFDDLPPETFDFFE
LPHMPAFPPPPPSPSEVTGSSLS
>Pgl_GLEAN_10030833 PgMYB117
MGIMIKGGVWKNTEDEIIKAAVMKYGKNQWARISSLVGRKSAKQCKARWH
EWLDPSIKKTEWTREEDERLLHLAKLMFTQWSAIAPIVGRTPSQCLERYE
KLLDYGACAKDENYEPNEDPRKLRPGENDPNPESKSAGPDPVDMDEDEKE
MLCGYG
>Pgl_GLEAN_10010676 PgMYB118
MGRSPCCDESGLKKGPWTPEEDEKLLQYIQKNGHGSWRTLPRLAGLNRCG
KSCRLRWTNYLRPDIKRGKFSQEEEQTILHLHSVLGNKWSSIAAHLPGRT
DNEIKNFWNTHLKKRLIQMGFDPMTHRPRTDFFAALPQLIALAAXXXXXX
XXXXXXXXXXXXXXXXXXXXXXXXXXXXXXXXXXXXXXXXXXXXXXXXXX
XXXXXXXXXXXXXXAAALGGLCSPQGTHDDSTTDPPVSEAGGQLLLPPCT
FPEAPVSSEGNQGISYGGGADVDVFACHDGGSLPPLTDLSDAANYPSAGG
CSATASSISFSGGTSSPLPWPEFFPDDPFITDFL
>Pgl_GLEAN_10037578 PgMYB119
MPSSSSTNTSDGTKSSSCPRGHWRPGEDDKLRQLVDKYGPQNWNSIAEKL
EGRSGKSCRLRWFNQLDPRINKRPFTEEEEERLLNAHRAHGNKWALIARL
FPGRTDNAVKNHWHVVMARRSRERSRILARAATSPSTAYVFGAGTTAASS
SLCFSFSKLGGGGGDGGMFSSPPAARPTSLFKSFGTTTSSKSFLGASFEA
ARYSYSGRQVLPPVSITFSSPREALAMDIGRHEHVHGQKDYYASDGGGDE
ALKRKDVPFIDFLGVGVPS
>Pgl_GLEAN_10034301 PgMYB120
MGRSPCCEKAHTNKGAWTKEEDDRLVAYIKAHGEGCWRSLPKAAGLLRCG
KSCRLRWINYLRPDLKRGNFTPDEDDLIVSLHSLLGNKWSLIAARLPGRT
DNEIKNYWNTHVRRKLLARGIDPVTHRPIADGAGAGGGVTTISFHPQQQQ
KQVKLKPPPPPPRCPDLNLDLCISPPCHQQEEEEEDEHQNQLELEVELIK
PVAAVVKREVLHASHGGGGAGGLCFGCSLGLQKGAPGCSCSDSHFLGLRA
GMLDFRGLEMK
>Pgl_GLEAN_10034291 PgMYB121
MGRQPCCDKLGVKRGPWTAEEDKKLISFILTHGRCCWRAVPKLAGLLRCG
KSCRLRWTNYLRPDLKRGLLSTAEEQLVIELHAKLGNRWSKIAARLPGRT
DNEIKNHWNTHIKKKLMKMGIDPATHQPLANSKMTTSQSNDTAESSKSSN
TRDKPSAKEGNHRDVALPTDSPEQSSWLESGNHSSGQDQEQLANWLAETD
LPMDEAWLNFTGSNDDVLGIAEGPLPWEGATDWLLDYQDLGMSSSNLIGN
SSTLGSSDGSNF
>Pgl_GLEAN_10015816 PgMYB122
MVCKEGGEPYMKKGHWSPDEDERLYRWITNCGVGTWSSVAELAGLQRSGK
SCRLRWMNYLRPDLSNQPISKQEEDPIVSLQKVMGNRWSAIAARMPGRTD
NEIKNYWNARIRKKIRKTAAKAHISTEICQNEHNKNFTSQAHPHLPTFAC
QPSSHSDPNCAEQNKAEESEQLTQNTPIHESNKFNLVDEYVNFLMSLPDV
VPDIYTWN
>Pgl_GLEAN_10018451 PgMYB123
METGSLESNGYHPSHTRDAELCARMVSMSNTIKDPALDHREAEVLPTAEV
ISAFPAAKRRVVNRPHQSVLALIAAERSAYSGDVTAAAPLPVLENISHGQ
LQVLSGVLPDHPSLTTDPDRSSLYVCTPPPLMEGRGVPKQFHGRLHVVPK
HSDWFSPGTVHRLERQVVPHFFTGKSPGHTPEKYAMLRNKVIAKYLENPG
KRLAFAECQGLVGSTGELYDLSRIVRFLDTWGIINYLAAGSVHRGLRMAT
SLLREEPSGELQLLTAPLKSIDGLVLFDRPKCSLQVEDISSMASSSSNSE
VVDFDAAFADLDGKIRDRLSESSCSYCLQPFPSVHYRSQKEQADIALCSD
CFHDSRYITGHSSLDFQRVDGVNDGLENDSDKWTDEETLLLLEGIEKYND
NWDDIAGHVATKSKAQCIYHFIRLPVEDGLLENVEVPNGSVPFRAQSNGY
PHLDSNGSTSGIPLQNFQHGNELPFINSSNPVMSLVAFLASAIGPRVAAS
CAHAALSFLTRDDDPRHGSEGMHADGRGNGANPNFHNHNGASPAISPENV
KHAAMCGLSAAAMKSKLFADQEEREVQRLAATVINHQLKRLELKLKQFAE
VETLLLKECEQVERVRQRISADRARMRSAMLGSTGMPGSSSTMPSNPVSM
SPRPVGVPGSMPQASMPTAYANNIQGHGHPQMPQMPFMHQRPQMLSFGPR
LPLSAIQTQPSPQASNIMFNSGMPSSVTPNHHQLLRSSSGNNSSAG
>Pgl_GLEAN_10033016gMYB124
MGRSPCCEQAHTNKGAWTKEEDQRLIAYIKAHGEGCWRSLPKAAGLLRCG
KSCRLRWINYLRPDLKRGNFTEEEDELIIKFHELFGNKNHLPMDGAECRL
APFHFKNSNIFSFSFKKRAYNASILPPGERAMQNASIPFIVKG
>Pgl_GLEAN_10029589 PgMYB125
MTERNDQGDVLGLGGYMEKKRLLSKTLLADAEGEVKVTKKKTRLGWGQGL
AKYEKQLKQQDGEKLVADGDNETANEAVVYTATPTPVVGGKSDHCNRISS
MSETVVSEVASSHICDLPEGANGVHGNRSLMSLLAEEVVQPPDVPPPSPK
CSTPPAGGDNGALGNSSASLTAVTVVNADTLLASSDGFNLSPDGSNARSI
KVQDIPHELISQPINKIQNSARMPPIIIRKLQKPREFLNKNIVFKEPGTN
ELQGSGFKTWSQEEKDVFAEKIKAIGTDFAKISSFLSHKSTTDCIKYFSK
HYKSECSNTPNKCLPATKQLQEKCKDVNDAAPYMSGIATVTATKSYKMMK
TVEDDLKKPAKQICHELMTRLQSHSHPEDGQHVESSIEEYEHVTGKVLVG
EMDVTSLQGMNSPITKSSEAACLTIPKTEVAELKILSEDSCSNEETRKGE
QEIWTKKEICHLIEAIEMHGMDFSRISVYVGTKSIQECKNFLCKNDLILG
KKHVNSNRNSNITVGTNVGSATSIIPSYSKVKENVPQPLACAYHSDGENY
QAGGSSGQGSSEIIIKSLSESCQKLSNVTTEVCQIISGEENPEVSAISKE
CNIDAEHSWNEETETNSITNVDNNAPSDMENPRSDDNPYIATNGAELVGH
HELVKPLEDSERLKIRSKENNDKAIRDDKMPEHSIASGEGSGIHLGCSVI
SQRDKEVVDIISSPERRHLSVPPIPASDGSSKISNLSCTSSSVALQIIYA
ETSHSEVDMDLNIPHDVAAPDLASVAFDNNCPEASMDLHEPLETTDIAEI
IKQESSIRARATNNMGGDREGAYDVTNVQDTHQSQTIVAESGHHPAYQPG
CIRLFGQVIYQAPLSSGTNLDSSQGNQFVSHSADMPSATDVPVREGGGQL
FPPGPSIWRSSPVNLSQQVVLSNNTMNLGQQTVFSNNTMNLDQQAVLSSN
TMNLGQEEVSPDTTMPCSSTSGAAAWRPLQFGSSALVNMSQQRQYMHMMM
RYSMMRRGVPYHLRQGSSNGLTNFNNFNPGQQQWPNDILDTSRVVMGYPC
LPGPTQNQARTTIMPSIINIEGVSRSSTG
>Pgl_GLEAN_10009748 PgMYB126
MPVKVEQDLALELPPNAEAVAGAGAEAEEFSPPLSSGEEEEEADDDDDDE
EDETDSEGYDGAGNGGGAPQLKKGPWTPEEDKRLKDYVEAHGEGNWNKVQ
RNAGLNRCGKSCRLRWANHLRPDLKKGPFDEEEVDKVIKFHMMWGNKWAK
MASHLPGRTDNEIKNFWNTRLKRHQRANLPLYPEHLRSQVLDQDMSCHIP
DESRGRKRSNELTLEKVVGMDDLVGDLMVFQHLDYGKDPVIPTNPLKRHA
STSDLSYVQSLDEVENFYSDDLNYVLTKSQSVPLGSAIANGYPIFDGNPS
TSGTIYRSVKTELPSVQYRSYDIGDSWLLQCPTASPIEQQIDTCIQSPES
FSSQNTGLLGEIANKGDAVDDCTKPERFFETVFPPLGYNIISQSNAYPMR
HPSSLVISDCELQGNFFDEIQASNSPPSGKCA
>Pgl_GLEAN_10011359 PgMYB127
MAHVSTQLQEEEKEESPVPPPPPPPRPSLEQEFEAVISRGAGVHVVPTFA
GWFSWKAIHPIEKQMLATFFDGKSEMRTPELYLGIRNLIMSKFHLNPEVH
LEAKDLSELSVGKMDDRLEILEFLAHWGLVNFHPFPPVMQKCELVESKTG
ADTAEQISLVEKLFHFETVDSYLVPVPKKADVISPVQFTSWLAEPTLVEG
AITTAESSVEYHCNSCSVDCSRKRYHCRTQVDFDLCSDCYNAGKFDEGMS
KADFILMEYADVPGSGGSNWTDQETLLLLEALEIFKGKEWDEIAEHVATK
TKEQCMLYFLQMPIFDSFLDGKEFSETPQKITQQDSAETGTFAVPEEMDV
DDNAEGKESTDEKTLKKANVNSSETGTELANQSVSAKEDTMNQGDHVLVA
SPAADESNKSSLVDPANKKNSADVDVSGEHASNFVIDVLRSTFEAIGHFL
DKEDSGSFAEAGNPVMALAAFFASVVEHEDAVTSCCKSLRAISEISPALQ
LATGHCFILPDPPSNLEDPTPEFSPCTGDECLGAAGGTQNVNATDKDSNK
MEESALDLEKEKATITSQKEHVELSNTKESFVKGPQAEVISNATKDSDNR
TAIMESGVASDKMRDGCNTILCSATSTNTNEPSSIASQEASAERTKDTTN
PEGVEGDKPSSMELPDDGSHLHGKVGPSSMQQHESNLTRNSNTKEPKSNE
NTIAAAAAADPVIRLQRAAGTAIAAGAVKAKFLAKQEEYHIWQLAALVIE
KQFQKMQVKMSFLSEVENLVLPLRELIQRTRKKLTLERREIASAIAATVS
RTNQHGAPGTARLPLPVALVQQLRRP
>Pgl_GLEAN_10021337 PgMYB128
MDPTKTNTEWSAFEIKMVKSLIARYKANKSHTDDMNKKHSDIISEVHAMF
PLKERLQVINLYANLIVEMMESTVDNGSYYFVGASRGLVNNNFEISVKDQ
AIDNTRVSQEVPLRRFAPRVQRSRTGFWTISEHRLFLCGLQVYGRGNWKN
ISKYFVTTRTPIQVSSHAQKYFRRIENTTRKQRYSINDVGFYDVKPWVQN
NNYDWEGFGFGGGAYNLDHNGANGQHATVNNLAQVQPSMLYHASQASSSN
QAVTLTCDKKIGVTSSSVALVMEGAGSSQVPCVGDQLGDFFSN
>Pgl_GLEAN_10007629 PgMYB129
MFPSSKKQPSTGAGSSNDRSMCVQGGDSGGLVLTTDPKPRLRWTAELHDR
FVDAVAQLGGPDKATPKTIMRVMGVKGLTLYHLKSHLQKFRLGKQHKEFG
DHTAMEMQRNVASSSGVIGRTMNDRSVTVNEALRIQMEVQRRLHGELEVQ
KHLQMRVEAQGKYMQSILEKAHQALGTSEFATWPAGYRSLAGNQAVLDIG
SSTGFSSLQDLHFYGGSSSHMDQLLHQMERPMDSFLTLGESFIGSSADKK
GPNHCSSSGKGSMIWAGEEDQQQQVKSGTDLLQMGPSTTLEGGISVMDPI
AGLYEGAMSGDSMGSKGFEGSSSKLEMKSPPHNKHL
>Pgl_GLEAN_10018726 PgMYB130
MAVPAPAPAPAAGEEVRKVRKPYTITKSRESWTEPEHDKFLEALQLFDRD
WKKIEAYVGSKTVIQIRSHAQKYFLKVQKNGTGEHLPPPRPKRKAAHPYP
QKASKNATQAVLSQQLPPQREQGSVMSMDTSTAVRNANANASASATVPSW
DNTYVQGAVATNNCSSSIESPSGTWPSSEAVEQENVVPPLRAMPDFARVY
SFLGSIFDPETSGHLQRLKAMDPIDVETVLLLMRNLSTNLTSPAFEEHRK
LLSSYGYDSDDNIKSEGMDNLGSPQSCHLPFM
>Pgl_GLEAN_10018730 PgMYB131
MRGFERKGVRQYNRSEVPRMRWTEELHRQFVEAVECLGGQDEATPKRILQ
LMGVKGVSISHIKSHLQMYRSSSNSSTHQSSLQKSTSTSDSKRVLNREDH
CVYASPDGNTPASEKNIYAMFRGCSHSSPYQIPSLQEVFRSWESRGRVPW
DSSVLTMEKAVRPRSHHTITCNKQKPEGCDLTLSIGLWEDAISSDADGSS
TISEELFPAPAAGATVKEEESKPALNLDLTISSSWLA
>Pgl_GLEAN_10026117 PgMYB132
MARSGGGGGGMEGCGGGGLKKGPWTQAEDKLLIDHVRRHGEGNWNAVRRE
TGLQRCGKSCRLRWANHLRPNLRKGPFSPEEERQILRLHGLIGNKWARIS
SHLPGRTDNEIKNYWNTRLKRRQRAGLPLYPPDVEREIASLRAQNINPFA
DADGNASSGLPPSLIYDASNPFALPPAVLSPSGSATTASHSPLINQSYPL
LNQMQGMPVFHLASSLQSPQPVFHHHHQDSGAALGHGHGGGFVSSGLPPL
PTRAHELPSNQFDTSSSGSGGDGAGLLESLLLGGDEHLPRHTPTMVKVNS
MPALTYREPGSGLPVHGAGAGSDSDDASHCLPGEDMHHGAKWNFTYEDFK
PAKRRTPSEAGISDMCGVAPSSTPGEWFRACGGSTAPSPGPSSAVTDDEF
GLEMQQFMSLLPLSIDEHSWNA
>Pgl_GLEAN_10038507 PgMYB133
MSTQSVATGEQFIATDQTVHACTPTQTSVHKLFDSKSDHRLLIDDTLSST
SQSSNIKTELIRSSSLSRSLSVNLQKRSPETDPESPLSHISHPKFSDPIL
SNSSTFCTSLFSSSSKNTDPCRQMGTLPFLPHPPKCEQQVSAGQSSSSSL
LFIGDTGNALDEAEQSDDLKDFLNLSGDASDGSFHGENNAMAFDEQMEFQ
FLSEQLGIAITDNEESPHLDDIYGTPPQLSSLPVSSCPNQSVQNLGSPVK
VQLNSSRSSSGSATTNKSRLRWTLELHERFLEAVNKLEGPEKATPKGVLK
LMKVEGLTIYHVKSHLQKYRLAKYLPESKEDKKASSEDKKAQSCSSSSDS
SKTKNLQVAEALRMQMEVQKQLHEQLEVQRQLQLRIEEHARYLQKILEEQ
QKAGNLSLKAPTKAQAESPESTVSKERSESEAGTTSPCPSKNRNPDVDSE
CKSAAVSKRAEFQVDPESEVPCS
>Pgl_GLEAN_10021771 PgMYB134
MNCPEEESGRKAAPVVLRLFGVDVRRVGDEELGGFELRKCSSMPDLTVNS
TDPVMPPADGKGYAADDLEMSSRQQKRRRRKAQERKKGIPWTEEEHRKFL
DGLRQLGKGDWRGISKGFVTTRTATQVASHAQKYFLRQTDPGKKKRRASL
FDVGIADFGDDQVPSPPNSATKPAPTQEIIHTDRGDVPIPSYRGFAAILG
NNIQVSELTNYFERPLPHAETSFASMASSALETASSVNSLELSIAVNNLG
LSIAPPARYGRSSGAAGAIKVL
>Pgl_GLEAN_10001215 PgMYB135
MTRRCSHCSHNGHNSRTCPNRGVKIFGVRLTDGSAIRKSASMGNLSLLSA
GSTSGGASPADGPDLADGGGGYASDDFVQGSSSASRERKKGVPWTEEEHR
RFLLGLQKLGKGDWRGISRNFVVSRTPTQVASHAQKYFIRQSNMSRRKRR
SSLFDMVPDESMDLPPLPGSQEPEASVLNQPPLPPPVEEEVESMESDTSA
VAESSAASAVMPENMHPSYPVILPAYFSPFLQFSVPFWPNQKDGDDLPQE
THEIVKPVAVHSKNPINVDELVGMSKLSIGESGQETVSTSLSLNLLGGQN
RQSAFHANPQTRAQA
>Pgl_GLEAN_10003870 PgMYB136
MAGRERVDGAVRQYNRSKVPRLRWTPDLHRRFVDAIHRLGGQHKATPKRV
LQLMGVGGLTISHVKSHLQMYRNMRTDDLDMKEMQQVVVHPTQMFAGGVH
VWTDMEHDHHGYCYCWCCYSQKEILLHDLQLKSVRRSYRNFGHIEVTSTL
RVQREGGEICGHNATAPNNRWATAVNERGAEDRDETSPSLSLTLDSGCCS
RTSNGSGRRNRQGSFVSSPSTGYGRGCSGQHGGRSRISLDLSLSMPMYNQ
>Pgl_GLEAN_10034383 PgMYB137
MGRKPCCSKDGLNRGTWTAMEDDILFSYVKKHGEGKWGSLPRRAGLKRCG
KSCRLRWLNYLRPGIKRGNISEDEEELIIRLHRLLGNRWSLIAGRLPGRT
DNEIKNYWNTTLGKKVMLKNSVRSKEGNGAAPEPEPEASPVVVRSKVLRC
TARLLPVVPARTATGDNGVRAEEAAVEAAPEPVVEVQQEQQLDFLREDEL
PVDLDFDMGELGFLSPWCGEVGGGVGPGGWFGGDEVSDLETLLLGPGGDG
ELHKFAWF
>Pgl_GLEAN_10024859 PgMYB138
MGRPPCCDKEGVKKGPWTPEEDLVLVSYVQEHGPGNWRAVPASTGLMRCS
KSCRLRWTNYLRPGIRRGGFSGDEDRLIAHLQALLGNRWAAIASYLPDRT
DNDVKNYWNTHLRKKLLLQQQKMQLQQRASAALSPPLPPPPHKGHASDKR
TGAAPVAGQPFARGEEGKATAADGEVPLSEIESWLLELEDGGGEHKPGLA
DGLLLDASLRNFRF
>Pgl_GLEAN_10024824 PgMYB139
MAKQSSCCHKKKLRRGLWSPEEDEKLMNHIAKYGHGCWSSVPKLAGLERC
GKSCRLRWINYLRPDLKRGTFSQEEEDLIIHLHSLLGNKWSQIAAQLPGR
TDNELGPNAVADAGHVDSYAGALDELRWSEYFDAAFQAAASQQGALQAGG
QCVYSGGKDDDVAVHFDVHGLGNWC
>Pgl_GLEAN_10015206 PgMYB140
MYHHQQQLQSHNHFLSPRQTFPPERHLLLQGGSVPAEPGLVLSTDAKPRL
KWTPELHERFVDAVNQLGGPDKATPKTIMRLMGVPGLTLYHLKSHLQKYR
LSKNVHTQANGGNAKNMVGCTMAMEKPPEGNGSPASHLNLETQTNKSVPI
GEALQMQIEVQRRLHEQLEVQRHLQLRIEAQGKYLQSVLEKAQETLAKQN
AGSVGLETAKMQLSELVSKVSTECLQHAFTGFEEMEGSQMAQGHTLQLGD
GSVDSCLTACDGSQKDQDILSISLSAHRGKEIAGMSFDLQAKERGSEDLF
LDKLSRTPPSHQERRERDSFIMAAKLDLNINDANDGPQNCKKFDLNGFNW
T
>Pgl_GLEAN_10026185 PgMYB141
MAHERDASSEEEVMAGELRRGPWTVEEDLLLVNYVASHGEGRWNSLARSA
GLKRTGKSCRLRWLNYLRPDLRRGNITPQEQLLILELHSRWGNRWSKIAQ
HLPGRTDNEIKNYWRTRVQKHAKQLKCDVNSQQFKDVMRYLWMPRLVERI
QAAAAGAPQPQLGADTPLSSSWQHGAQDGIYASPDELPADACWPAEYYSA
AGDHQLLNNPHAVPELSGTTAGSSSPSSDSGAGAQPWLAPMSGAEWFTTA
CDASSAAAVAMHHDTVLAGHQQQTQQQQPCLVGETWASSELPELGVADFE
IGSFDVESIWSMDDNLWYTQAQGV
>Pgl_GLEAN_10009674 PgMYB142
MSSSLPILPNSLKESFPMPHNPQHIPMSRQLPDDSMPLHNGTPQSDILQP
RTGVIGASYSGYSANPLDSVSNHEAQFMVSPFICQPSNVDVFQSLSDNTP
GAHAEATWFPSSMDVLPVYTDNIAASDNQIQSGSSAMTSDEVAKQNDWWA
EIMNDDWKDILDATATDSQSKAMMQPSNSTASLLAVNQSASSYSGDVCPV
ASPPNSCNASAAKQRMRWTPELHECFVDAVNQLGGSEKATPKGVLKLMKV
DGLTIYHVKSHLQKYRTARYKPDLSEGTSEKRTTTEELSLDLKTSMDLTE
ALRLQMEVQKRLHEQLEIQRKLQLRIEEQGKYLQMMFEKQCKSTTEVVLD
PSSGDTSANPSSDRSHSANKDSSAAMDRNRIGDRPGTAKLGERSTQLGVK
QKIAEINADTEAAADGAPKISQDKRRKLQDS
>Pgl_GLEAN_10030123 PgMYB143
MGRAPCCEKVGLKRGRWTAEEDEILASYIAKHGEGSWRSLPKNAGLLRCG
KSCRLRWINYLRGDVKRGNISKEEEDVIIKLHATLGNRWSLIASHLPGRT
DNEIKNYWNSHLSRQIHTYRRTYTAAPDTTITIDISKLHSANKRRGGRNP
GRSPKRAAAAATTSGSNNMAKTKDLPDDDPGSKKPEPESGNATGASAASS
PPQSXXXXXXXXXXSSSGAGATPCSEDTTGPLAALDPMQFGGLWEAESEM
EALLLMSDGGSFVCGPDPITGFMDAVGDAAHQVDDLLDMDWDGFAAHLWG
DHAAPAQHQQQLQQCDDDQSTPPLLPPDEPLPQAAAASCNKHQEDELESF
ATWLLSDSF
>Pgl_GLEAN_10014494 PgMYB144
MEWSDSENERFERALATYGINAWERVAAAVGGGRXSTVSGRTSATSSPAA
APPTPATPATATGITTVHVKLAP
>Pgl_GLEAN_10023408 PgMYB145
MEKEVREELNPLLQIIEFAPSTSDPNQKLDSAQPSDPNLKPAKKPTRQWA
AWTRQEEENFFNALRQVGKNFEKITHRVQSKNKDQVRHYYYRLVRRMKKL
LGPGFSLDAKNSKDTIAAMLRWWSLLEKFSCSASKLHLKPRRFKTFVEAL
GNQLLKDRNKSRRKCPRVDMCVSSPSPIVGKAPGNEPFPLKFLPVDTQNG
SRVASPKGAFFKRVAETNSSKSGATKGDLSATRTVKQKRRAGGVVASAAY
KKWERAAMAGVSLVADAAEELERNTSNSGILCNVDARTLTSSSDKLSTVD
GISTNHMKEADSQAPAKLKLQLFPINEATRKALEKDEHNPHLELTLSSRK
KISSVLEHLNRKWGNSNISSGELILFPYCAHQEDLATYQRWTTRDTVAVA
DVFVSVNSPSVFRLRYGWFSLVELEAGVSEISLTHFENCMIPEDIQVKSP
SGDKSCVQNDGTLLRSNIHEHSSIDHSALLHITPSGTGKITEVSEQKTSQ
FGSQKQVRVPATQAVEDDQGMNCAAISEGEWADTLTDISVGYLLTEASKG
THLDCIGTSSVKNALLLENPCSYDSFDAAIALHVSRFQASEQPAHTPHST
IWGGEETCDEFSFNLSSSMKQERSNTPSSSSPGTDNEVHPLNSEGFQGFL
QDLTGGEAAAENPCNDDGKDRVEFCAKSPPRNDDTKELKDQSLADIYWSQ
EAVNPKAYPLADAQMTITILELIQQAANYKQLKKGANEATKTLNRGISEF
VVMAADTEPLEILLHLPLLAEDKNVPYVFVPSKQALGRACGVTRPVIACS
VTSNEGSQLKTPIQELKNNIEKLLI
>Pgl_GLEAN_10024234 PgMYB146
MAVPSEAAVVVVDGVQPGPAAVVKKSAWTKEEDAALREQVRVHGPQNWAA
ISDALPGRNPKSCRLRWCQHLTPGVDAARPFSPEEDEKIAQYHRMFPNRW
ATIAYFLPGRSDNAIKNRWNSVLGKQPQPQPQQQQRRVVAAPLLRLSDGT
LPLFPLASGDVRAFGRGVPVLHRLPHVDAGVDLSGACLKLFPLAPGDLVG
GDNPSEAAGMDVDCSADDQTVTEMTLLPSTRAASMAAFKAMVQAVRAP
>Pgl_GLEAN_10014410 PgMYB147
MAAAAEARGPDFPVGMKVLVVDDDPTCLVVLKRMLLECRYDVTTCPQATR
ALTMLRENRRGFDVIISDVHMPDMDGFRLLEHVGLEMDLPVIMMSADSRT
DIVMKGIKHGACDYLIKPVRMEELKNIWQHVVRKKFSENKDHEHSGSLDD
TDRNRTTNNDNDYASSANEGGDGSWKSQKKKREKEEDEADLENGDPSSTS
KKPRVVWSVELHQQFVNAVNHLGIDKAVPKKILELMNVPGLTRENVASHL
QKFRLYLKRIAQHHAGIPHPFVAPASSAKVAPLGGLEFQALAASGQIPPQ
ALAALQDELLGRPTSSLALPGRDQSSLRLAAIKGNKPQGEREIAFGQPIY
KSQSNTYGAFSQSSPAVGGLPSFAAWPNNKLGMADSPSALGNVSNPQNSN
LLLHELQQQPDTLLPGTLYNIDVKPSGIVMPSQSLNAFPASEGISPNQNP
LVIPSQSPSFLPSIPPSMKHEPLRASSSPSNSLLGGIDMVNQASTSQPLI
STHGANLPGLMNRSSNAMPSPGISNFQSGNNPYMVNQNAMGVSSRPPGVL
KTESTDSLSRSYGYISGGTSVDSGLLSSQTKNPQYGLLQSPNDGTSSWPP
SQDIDSYGNTLGQGHTGSTSSNFQSSNVALGKLPDQGRGRNHGFVGKGNC
IPSRFAVDEVESPTNNLSHSIGSSGDIVNPDIFGFSGQM
>Pgl_GLEAN_10009509 PgMYB148
MDAISSLMLQEGWRKGPWTALEDRLLTEYVQQHGEGSWNSVAKLTGLRRS
GKSCRLRWVNYLRPDLKRGKITPDEETVILQLHAMLGNRWSAIARCLPGR
TDNEIKNYWRTHFKKARPSRRARAQLLHQYQLQQQEQRRQYLHLLQQQQQ
QQSQQLLLQQQSHQLLMGQQLQEHQSPPEHDDHQATVMAAMVNNLQGTDE
CSCSPASTAEHCTIPDDDDALLWDSLWRLVDGDGCGDGSSGGEY
>Pgl_GLEAN_10037679 PgMYB149
MVRTVVGRERSGGVRQYNRSKVPRLRWTPDLHHCFVHAIHKLGGQDKATP
KRVLQLMGVGGLTISHVKSHLQMYRNMRNELGIMQGSMQQLVHRADHQEH
ILYYDGSGGMHKQLCNGMRQQHRDHHECDGPCCCRHSPKPRKEEPTPLLL
HPQLKRTEARRDEEADYGSGGSPKSLLRGPGGPGICESDGSWRRALAAGG
YNYMRIMQAAMGGSMAAAASAPPPEVVVEPCRGGAGIKRRQRADGERAPP
PPPPPPSSSKAFTFLGFVVAPGPPPPPPQPVVACCSSSSSSSRDHPFEVC
TTQHTTALSVSSLDHRLRRRRAAWDPPSLLGDERKRVIRGGTNRMDGRIV
VSGPAPITTAPFSAVPCFCPSSLLQRTRVPSRSSSLP
>Pgl_GLEAN_10001419 PgMYB150
MGEEAVDDDYDYQYQYHQLGLPGGGGGDRVMEWEAGLPGADELTPLSXXX
XXXXXXXXXXXXXXXXXXXXXXXXXXXXXXXXXXXXXXXXXXXXXXXXXX
XXXXXXXXXXXXXXXXXXXXXXXXAAAAGTNAGTNTGTNNNTTTSKRPRL
VWTPQLHKRFVDVVAHLGIKSAVPKTIMQLMNVEGLTRENVASHLQKYRL
YVKRMQGLSNEGPSPSDHIFASTPVPPSLVLHEHQVPYYHHPHHYAGAAG
YPQQAYHHHHHHHHADK
>Pgl_GLEAN_10022172 PgMYB151
MGRMCGGRAGGEPAVRKGPWTLEEDLVLVGYVSHHGEGSWDNLARSAGLN
RNGKSCRLRWLNYLRPGVRRGSITPAEDAVIRELHATLGNRWSKIATHLP
GRTDNEIKNYWRTRVQIRRPAAAAAKYTQQQQPYRAPAAAAPTTTAMAAS
EGAASSSSSPASANHGSSSSAAGDYYYWCMKPPYNDPDQQGAYHSQKTVA
SAAAQDSSSTSTTTAGDAGCKLTGYSHPYYSEMGSSVADGVKMVDADNFW
NVVDNFWGTLPVPDATF
>Pgl_GLEAN_10022161 PgMYB152
MASMSMSSARPQWTKKQDKLFEQALAVYDKETPDRWHNIARAVGGKSAEE
VRRYYEILVEDVKRIEAGKVPFPAYRCPGGGAPANMTMGGY
>Pgl_GLEAN_10022160 PgMYB153
MASNSTWGSSSSSSDHWTRQEDKMFERALAVYDTDTPDRWHNVARYMGGT
RSVEEVRRRYQLLVRDVEQIESDGVPFHWYAAAPPPSRLQRGIHRSSSPR
>Pgl_GLEAN_10010463 PgMYB154
MALADATAFPYGLRVLVVDDDPTWLKILEKMLRKCSYEVTTCGLASVALQ
ILRERRNKFDIVISDVNMPDMDGFKLLEHIGLEMDLPVIMMSIDGETSRV
MKGVQHGACDYLLKPVRMKELRNIWQHVYRKKMHEVKEIEGNDSCDDLQI
FRNGCEGLEERGLFMRADSDSMRKRKDVDSADQDSSDGATVKKARVVWSV
DLHQKFVNAVNQIGFDKVGPKKILDLMNVPGLTRENVASHLQKYRLYLSR
LQKQNEERIMGAARQDFSHKGAPDNLNLRNSFQEQPSNGTNDFHHTSQKI
QAQSNLLDSHLEDTKIVAPLKMSDKIGTPVGDVIDPQNVTSASPLGGVVS
FERMPLNPDRKTSETMILECQSWSGNVPPKQFMQYPKHNHERCDLLGDYS
CLPKPDLEHSITPGHLYVPPPLVSMSCSMEADVRDFSDVKPDLLGCMKSL
SPALTCTVDSVSAQLSDSVVTSTNTDPKFSSVEGLSSSKDCLFDLARNQT
TLLNSEEESIICRTDLACLPDDLSDYQLQGIGLNNIDLFQCNDAMMLHGL
QNNWYDDPEPSSEIMEFPLLDGCLFA

>Pgl_GLEAN_10020208 PgMYB156
MDFQHQQQQQHHHHLHHHTTVLAAGPPAVAARPWSKAEDKVFESALVVLF
LQGLERYGRGDWRNISRFSVRTRTPTQVASHAQKYFNRQLNPASRDSKRK
SIHDITTP
>Pgl_GLEAN_10020166 PgMYB157
MAFEESAVFNRVIASVLAGDEVALSYLARSSHGGPRFEHNLVAPSCIQVG
GAQSMGSYHDVSSLVAGIGMTPTGFEMPEGDITADNYNALGGVPIDVAVA
PQLEIGNDVKPAPFKGTWTEEEDRILKDMVVQLGERSWSVIAQYLPGRIG
KQCRERWINHLHPDIKPNDMWTEEEDRILIGAHRNFGKRWSSISRFLPGR
SENAIKNRWNATERSLKSKRRLKKKRSEQVPPGQLSILEEYILSVSPLSE
FASPPPPVSPPPQGLAYNGPVVDPEAVHSLAPQMEMNYNAANPPGPASPH
LQGMLNSNMPLLPDLNISYDPQEEYHLSYPMCTPAPPPPQQIVTQDPQQA
SFSWFPFAEYHNALNPEFAIGSSYYYTGGYYNSEEGPSNAGANGYYSEEG
PSNAGANGYYSEAAGPSNTCANSYYSEAGPSNAGGSGGEPAVDNDNIARP
ATSEDFISNDDVNLDFSRFG

>Pgl_GLEAN_10007906 PgMYB160
MMSASAVAMRAEMGGGCGEEELEDDLDALLSSGAGGQWRRPADAGERERE
RELSMFRSGSAPPTIEGSLNAISGLLRSDPEAAVTAAPIPVAEALNGHGG
LLSDEELRADPAYLSYYYSHGNLNPRLPPPVLSKEDWRSTQRLKAGVVGG
IGDRRKVGQEDTVQGTGTTVGRSLFSQHPGSEQQEEARIDGGGGGGGGAE
WVDGGGDGLIGLSLGRQRSFADILQDNIGRRTPTSEHPSRAASRNSFLDN
QEPLDSAENQYSMHTDILEVQNVCALHSLNASTSQTFASILGPSVSRNAT
PDPHYVARVPSPGLPPVGVRITSNEKKLNCSSSHFNTVSSKAVGADDILS
ALSSMNLSKGGTLNGNNNISRSNFQRGTSDQQKFSLDSHAEVAQVNNKQH
PVILGTDEYLGMPSMSQPYNTSFADINNSMAGLAELRNNANTRSDRHLDM
QRSSNLSARSYQKSPSSSNESPGGSPAQHQNFDGINSAYLNYGLSGYPLS
PGLPSMMPPLFEGAAAASAIASLSADSRNLATNILASPTLSLTDVHNLGR
GGNQAPTAAGLQSPLSDPFYVQYLKATQYAAQGAGSYGDPSLERGYMGNS
YGNLTAVQKAYLEALLQQQKQFEMPLLGKSNASSQGYYGNLPFGMGMAYS
GSPLGSPAASPSGPGSPLRLGERNLRFPSNLRNLGGWTSDPSGYMNENFP
SSLLDEFKSNKARSFELAEITGHVVEFSADQYGSRFIQQKLETATIEEKN
MVFEEIMPHALSLMTDVFGNYVVQKFFEHGSAEQRRELADKLFGHVLALS
LQMYGCRVIQKAIEVVDLDQKTKMVTELDGHIMKCVRDQNGNHVIQKCIE
CVPEDSIQFIISTFYGHVVPLSTHPYGCRVIQRVLEHCADPKTQQIVMDE
VLQSVCMLAQDQYGNYVVQHVLEHGKPHERSIIIEKLAGQIIQMSQQKFA
SNVVEKCLTFGGPTEREVIINEMLGTTDENEPLQAMMKDQFGNYVVQKVL
ETCDDQQRELILSRVKVHLNALKKYTYGKHIVARVEKLVAAGGDSHLRCR
QGRHVKVWSCTHKPQLALKEHVPQDYEEEEEEVEEEREGEGETEDAAAFG
SGACRGGRPGKKTRMVWTPELHHRFVEAVAHLGDKGAVPKAIVRLMNVEG
LTRENVASHLQKYRIYLKRTRSLGGHPHLPTAYGSPFNPLPPSDPSTRSG
YRAFP
>Pgl_GLEAN_10005529 PgMYB161
MAEVVQEGCVENRQPLAASSSSVSDGSSCGGGGPAGTSPLVSSSGNSISG
LRMSMIKENTAVAFDRKLTVNVNSSHGDLRICMVSVSIYAAEFFHDRTEV
QCLHRWQKVLNPELIKGPWTQEEDDKIIDLVRKYGPTKWSIIAKSLPGRI
GKQCRERWHNHLNPEIRKDAWTPEEERALINAHRVYGNKWAEIAKVLPGR
TDNSIKNHWNSSLRKRLDTYGANSFLAAPNLLAHDDLKDQMRPIAMGNHL
DLNKVPSIGSKDVPGRAHRSIVGSLSQAYNLKDSAFLSLSIPTAQTSYEM
TLVDGSAVTLAALGQSESVRGKGLEIEKGIEVCSTPDPVGEGCAIQLKSA
PAKNGTKSCLKNELYSTLGPLCYQIPNMEEVATISSSLHSENHGLHQTTQ
HSRDGLKSPDGFTSPSPTVGKVSSPLTVDSILKTAADSFPCTPSILRKRK
RDKSTPTPDNELKMGGVNTDSFYTPNGKGASTNTPGSFKTALLSLGPLDG
FLTSVRSSDASPPYQIRSKRMAAMKSVEKQLDFSADGLDTSGSEILNSPC
HNSEGANSNRT

>Pgl_GLEAN_10024574 PgMYB164
MGHHSCCNKQKVRRGLWSPEEDEKLVKYITTHGHGCWSSVPRQAGLQRCG
KSCRLRWINYLRPDLKRGSFSQQEEALIVDLHRVLGNRWAQIAKHLPGRT
DNEVKNFWNSTIKKKLISQAVGSLHPAAELYYNILDGAGQGIAAAGCAPP
LSGADNASAQAATAGAQSPTTMVHNPVAAWADFVSQPLFLPVSNNVLHGS
GDDGLHQYAVDGEFIKLCRAADAFPPPESAGAGVATSHQYCKPADLLAQQ
EGAAASTVRSLPTVFLEPKGGAGTFAADPALGPVMDFMEAILGSSSTSAL
SASSVDSFSANTGMQAQCWIP
>Pgl_GLEAN_10012285 PgMYB165
MGAPKQKWTQEEEEALRRGVQKHGAGKWRTIQKDPEFSPVLSSRSNIDLK
DKWRNLSFSANGLGSRDKMRAQKLTGPSSSPASSSHASNAVPNKVAEVSQ
DAEKKPQDGKPQPKYGPMIVEALSELNEPNGSEIGAIYGIIEQKHEVQPT
FRRVLSSKLRRLADAKKIEKVDNKLYRLPDSSAARNPAPIKASAPKQKDL
SKPSKMSKNLGLFAAASPALEAAMAAAAKVADAEAKAHDAHDQMMEAERI
IKMAEETECLLTIAAIAYDRCSRGEITTLNPAPRERQPH
>Pgl_GLEAN_10020860 PgMYB166
MGRHAAAAAAAAGVQHKLRKGLWSPEEDEKLYNHIIRYGVGCWSSVPKLA
GLQRCGKSCRLRWINYLRPDLKRGSFSQQEEDAIVGLHEILGNRWSQIAS
HLPGRTDNEIKNFWNSCLKKKLRQRGIDPSTHKPISASAAEAAALDQQSA
SQEQKPPADAADSGFALKRHHQQLFDPFPLTDSFGGGFDAAGAALYGHLV
GGGKQQDSAGFVDYSSVLDVSENLGYGESSSNSSNWNCAPEASNNALDGG
DAPLHWTSESKAVEPHFASYGGGEEQSLEHKFMLPCHGQQEQSMPHFDFD
ISRGAVVGEFNLEFF

>Pgl_GLEAN_10023913 PgMYB169
MSGSRSSSSRNVNMASTWSKREEKLFEEALAYYGEGTPDRWHKVSRAMGG
SKTADEVRRQYEILEDDVKLIESGRIPFPKYNTQGAWN
>Pgl_GLEAN_10022186 PgMYB170
MACGRAGDQSAVRMGPWTLEEDLILVGYISEHGEGSWDNLARAAGLNRNG
KSCRLRWLNYLRPGVRRGSITQAEDAVIRELHVALGNKWSKISKLLPGRT
DNEIKNYGRTRIQKKPAAAANKSWHQRLGP
>Pgl_GLEAN_10009281 PgMYB171
MYWICIICGCLTGDEAEVGCGGGGSREMQILGGGEMQWRRGRGKGICLRE
GEDKIITTNLNSDGDGEDTAEDHGGAKSNSNGDEQAGRSHTGKARRLLEE
KLRETYYYTTRDAKAWPPSRPLRQEAKSTAQHFVNFMEEEEDLVFRMHSL
VGNRWELIAGRIPGRTAEEVEIFWSKKHQDK
>Pgl_GLEAN_10009833 PgMYB172
MGAPKQRWTPEEEAALKAGVAKHGPGKWRTILRDPDFSTLLRLRSNVDLK
VTLGSPGRVGGFDKWRNLSVVAGGYGSREKARMALKKGRRVLPKVAAEPM
DVDANGLGNVHNAVIDAEPLAMAVEPVAVEESQEKSVARLDDLILEAIMK
LKDHSGSNKAAIAAYIEEQYWPPDNFPRLLSAKLKALVTSGKLMKVSPLS
DALRLKVNQKYRIAPSSPSLGGISTKVSSAEEMNGENDTKQLTKPQVDAE
LEKLKGVTQEEAAAFAAKAVAEAEVAMALAEDAARAAEIAENDAETAVAF
LEALTLSLKDRNANSTVVNPSFVRISMR

>Pgl_GLEAN_10022280 PgMYB174
MGRAPCCDKVGLKKGRWTKEEDEILGRYIKEHGEGSWRSLPKNAGLLRCG
KSCRLRWINYLRADLKRGNISEEEEELIIKLHATLGNRWSLIAGHLPGRT
DNEIKNHWNSHLSRRAADFRDGVVVNVDLSKLPGGGKXXXXXXXRGGRAS
RGIMAAAKAGKERKVKEKGKDKGKNKAAEAEQKRKLEEDDVAVSTPTSHS
QPCATGKSGEEQAQASASGVTSVDGPEEDPLALSEEMISALLGPVSPKVD
VGPDSYMDSDSGLGGPTGDVAQELGEDDKAIMVDWDLMGLDIATAGDMWD
PLVWDYPDMDIVVPDGGLQHQQEDVVSDLFFLDNL


>Pgl_GLEAN_10010138 PgMYB177
MGRHSCCYKQKLRKGLWSPEEDEKLMNHITKHGHGCWSTVPKLAGLQRCG
KSCRLRWINYLRPDLKRGAFSQDEEDLIIELHAVLGNRWSQIATRLPGRT
DNEIKNLWNSSIKKKLRQKGIDPNTHKPLAEVDRKAAPTISAERTSESSE
IDPSSGGALGNLSHLLSETAQSPELLPVLGKRRKETTSLAHLRVPPKELF
LDQLVSGNENLPSCRSTGPIPNFPFQQLMCYSNEFGSKHGGSTNSLWFNQ
NESSCSTISTVMPPVSPSTLSTSTGLNRSPDNPHSGGAGMSNQFYWDTTN
PSSSSSKGSSGSNSLGFELQSTSSILENSIFPWTDLSPDKNSHLEEELKW
PDLLHGTFTDTPATMQNLGQSLYEDVVKAESQFNMEGLCAAWSQNLQPQQ
HVQVVSDLYDKDLQRMSLSFENI
>Pgl_GLEAN_10014000 PgMYB178
MANDMASFFGSALPPACLASFEEEEEQAEDGGADHGYGGGGQAGKLCAKG
HWRPAEDAKLKELIGQHGPQNWNLIAENLDGRSGKSCRLRWFNQLDPRIN
RRAFSEEEEERLLVAHRAYGNKWALIARLFQGRTESLTTPSRTTGTFSPR
AGSASSPPARSAAAISHPCRRPSCCTLTSSNQRPPSTYTARARRVTAAVS
PRSPPRPTLPTFPPGPGSAGVNFFSQSNAIVPHAAATPASAAFASSARSA
FSAPSPARHREVACDEAALQFFDFLGVGATC
>Pgl_GLEAN_10014001 PgMYB179
MDRDHEMFSFSGGRVPPAAALSPFQLHQEKEQEQAVVAEEVYHGHVEDPE
EIACGRGGHGKLYARGHWRPAEDAKLKELVAQHGPQNWNLIAENLDGRSG
KSCRLRWFNQLDPRINRRAFSEEEEERLLVAHRAYGNKWALIARLFPGRT
DNAVKNHWHVLAARKQREQSGSLRRRKPSSCSTAPTHLVAVHHHYNSPPL
PFHAGGAHTRHGVHTEAVAATRAHSGGESEESASTCTTDLSLGSVGAAVV
PCFYQSSYGGYDMAPCAAALAPSARSALSVYSPARHRTKGSDNGCNKLAR
PFFDFLGVGAT
>Pgl_GLEAN_10014003 PgMYB180
MAHEMAAFFGAAPPALAPFRDEQRRHVDEVYHVDDVEDGDAGHRHGGGGG
QGKLCARGHWRPAEDAKLKELVAQFGPQNWNLIAEKLDGRSGKSCRLRWF
NQLDPRINRRAFSEEEEERLLAAHRAYGNKWALIARLFPGRTDNAVKNHW
HVLMARKQREQSGALRRRKTSSGGESDESASTCTTDLSLGSAAAAPCFYQ
SAYNPGYDAAPRIAAAFAPSARSAFSAPSAAAHHREARSDDKVPAPLPFF
DFLGVGAT

>Pgl_GLEAN_10007566 PgMYB182
MMREMYMEVLPPMDHIAARNGWYHPAVRTWTPQENKQFERALAGVDLRCP
DWEQVARAIPGRTVREIVHHFKSLEVDVQQIESGMVPIPLYGGGGGGSFT
LQWDGNGGGGPGDFRHAYRFGGGCGKRHPGRTPEQERKKGVPWTEEEHKL
FLLGLKKYGKGDWRNISRNFVQTRTPTQVASHAQKYFIRLNSGGKDKRRS
SIHDITTVNLTDDQPPSPSQSSLITNQSNASAPATAVGQFSLSSETKKHG
AANLPFNSPSRTPGMATYGMGLQDQDGYLSGSADLLSTDHACYEVDLHPI
MDLAFARHG
>Pgl_GLEAN_10004547 PgMYB183
MERGSDDEVLQGKKARKPYTVTKPREPWRAEEHARFLDALLMFGRDWKKI
EEHVGTKTAVQIRSHAQKYFLKVQKLGLAAGLPPVHPRRRVFMENQSSAS
VAAGSAAAAAMPLLQGSVAAVPPEMQHGLECPGGSASGTASRRSGVRSQI
APPATLRGGSHFTTGAPSFSSASMEWAGSDSSTSEEGSATGPVLDEQLIQ
LPLSPDDLHFAQVYRFVGDVFDPNSRIPVEARLQKLKDMDDITVKTILLV
LRNLENNLSAPQFEPIRRLLSTYDPRRGLSG
>Pgl_GLEAN_10024648 PgMYB188
MGRTPCCDRSAVKRGPWSPEEDEALRTYVQRHGSGGNWISMPKKAGLKRC
GKSCRLRWLNYLRPDIRHGGFTDEEDAVIVSLYTQLGSKWSLIASQLEGR
TDNDVKNYWNTKLKKRLLAAAAADADAGSTRSPXXXXXXXXXXXXXXXXX
XXXXXXXXXXXXXXXXXXXXXXXXXXXXXXXXXASTWSADNGGSEGSFLL
DFCAGSGSGSGIGAADDHLQLPGGYYYPLDPSLSLV
>Pgl_GLEAN_10013323 PgMYB194
MVRPPCCDKEGVKKGPWTPEEDLVLVSYIQEHGPGNWRAVPTRTGLMRCS
KSCRLRWTNYLRPGIKRGNFTDQEEKLIVHLQALLGNRWAAIASYLPERT
DNDIKNYWNTHLKRKLQSGGDGAAKPPAHRPASSSXXXXXXXXXXXXXXX
XXXXXXXXXXXXXXXXXXXXXXXXXXXXXXXXXXXXXXXXXXXXXXXXXX
XXXXXXXXXXXXXXXXXXXXXXXXXXXXXXXXXXXXXXXXXXXXSRRRRR
QRPGPSPSTRRSRPSRPRRCRCRRSSLGCSTTTATSTKSRAPACLTCPPW
ITRSSYSAIVCSSDAAQANHLNQGVWCGHSVVA
>Pgl_GLEAN_10016246 PgMYB184
MGAPKQRWTSEEEAALRTGVAKHGVGNWRTILNDPELSPILCYRSNVDLK
DKWRNMNVTVTASSSRDKVRSAVKKTRAAPKNNDQPAAISTVTSDADDEI
VDVKPIASVSSEAWNTSHSKKSQSHSRLDNIIMESIKNLNEPTGSHRTTI
ANYIEEQYWPPSDFDHLLSAKLKDLTASGKLLKVNRKYRIAPSSPRLEGR
SPKMLLLEDVQKEPFKVGIDASKSITRSQVDAELARMASMTPEAAAAAAA
RAVAEAEIIMAEAEAAAREAEIAEAEAQAAQAFAEAALLTLKNRNAAKLM
AQG
>Pgl_GLEAN_10020214 PgMYB176
MTTVATTTAAAWTMDEDKAFENAVAXTPDSAGGAASALKDGGGGLGGHRR
EERKSGVDVAKSCSKAEQERRKGIPWTEEEHRLFLLGLDKFGKGDWRSIS
RNFVISRTPTQVASHAQKYFIRLNSMNRDRRRSSIHHITSVTAGEPKPSS
ILP
>Pgl_GLEAN_10024645 PgMYB189
MARKCSSCGNNGHNSRTCGGHGRVLMENGGGGGGVRLFGVQLHVGSPSSP
MKKCFSMDCLSSAAPAAYYAAALAASSSSPSVSSSSSLVSVEENAEKVAT
NGYLSDGLMGRAQERKKGVPWTEDEHRRFLAGLEKLGKGDWRGISRHFVT
TRTPTQVASHAQKYFLRQGSLTHKKRRSSLFDVPERVLPPSLSSPLQLPR
CSSAMSSGSGSTSPCLAAPRQQKHPASSLTLPKPHQVSLHQLAPPDLELK
ISTPTDHQAGSSPRTPFFGTIRVT
>Pgl_GLEAN_10024668 PgMYB187
MESCTPWTEEEHRMFLMGLQKLGKGDWRGISRNFVVSRTPTQVASHAQKY
FIRQSNSSRRKRRSSLFDMVPEMPMDESPAAVEQFTLQNTQDEATSSNQL
PTLHLGKQKEPEVAQLPTFQLSQHEESEYAEPSLPLPDLEMNSGVPFKTI
SVPAVPAFYPALIPVPLTLWPPSVAHVEESGTAHEVLKPTPLNSKEAVKA
DDVVGMSKLSIGEASSVSMEPTALSLQLIGSTDARQSAFHVSPPMNRPEL
SKRNSSPIHAL
>Pgl_GLEAN_10028933 PgMYB185
MATPPAPARRRPRRGRGCGLRRSGKSCRLRWMNYLRPDLKKEPISKREEE
IIISLQQSLGNRWSAIAARMPGRTDNEIKNYWNSRIRKRLSAAAKSGAGG
SSSSSTELAPAAVPAAEEKVEPEPINAATESAPMPIPARFPMFACQALDG
TGAACTPSSTTSTQQSTGDESEASVGDSDMIHFLSFDDLDYPADFLVDVP
GAMDAWESELYPANSMSSFLYRY
>Pgl_GLEAN_10028934 PgMYB186
MGRVHPCCSEEKKVRKGLWSPEEDDRLASHIARFGVSCWSSIPELAGLQR
CGKSCRLRWMNYLRPDLKRGRFSQHEEDLIIALHKALGNSWSQIAARLPG
RSDNEIKNFWNARLRKKLRQKEACASSSTAGSKEPAASHRRRRDADVDAG
THPASVFNPPFRAPEDLPRPASAAGYVSSAAAGISSYNNDESAAGITAAT
TATGGGAVLAASESVAPSPTSTASACTDTAQAGGCDDGFLKAMVDDASFL
IGDFYLDGGNHDGSIGFWGGHAFS
>Pgl_GLEAN_10030436 PgMYB175
MDALWMSSCGGLPSSAAAVVGEDETAAGELRRGPWTADEDALLAGYVAAQ
GEGRWNELALAAGLRRTGKSCRIRWLNYLRPGVRRGGFTPREQLLILDLH
SRWGNRWSKIAAHLPGRTDNEVKNYWRTRVQKHAKQLGCDVGSARFHDAM
RNLWMPRLIERIHADESAAAAAASADVSHCYYSAPASSSQPACQNAVAPI
ISNCARAPSPDATSCVTGGSSSSWEASPAAQFQESSPAMAAWSAPDQCQN
GCSSATSGDNMFEESWSELLARANHDDAGVLPDFGLGETGDNWWSLDDIL
QQPLYCSIY
>Pgl_GLEAN_10030557 PgMYB181
MDAVATSKHEEEMMELRRGPWTLEEDNLLMNYIACHGEGRWNLLARCSGL
KRTGKSCRLRWLNYLKPDIKRGNLTPEEQILILELHSKWGNRWSRIAQHL
PGRTDNEIKNYWRTRVQKQARQLRVDANSSVFRDAVRCYWMPRLLEKMAA
ATXFDAAALGSLGLDALDLGPADSDLYSDSTLLDYLNSTCCAGGSGAMMA
TMIGSGVVGNAANNSCGGAMGVDNCGDYYGLSSSSSWRADELCQAAARKL
GDHQWGGGI
>Pgl_GLEAN_10031693 PgMYB155
MGRSPCCEKAHTNKGAWTKEEDQRLIAYIKAHGEGCWRSLPKSAGLLRCG
KSCRLRWMNYLRPDLKRGNFTDQDDELIIKLHALLGNKCSKELRGIIMRI
ARCGKLGTGEFLEKLTWP
>Pgl_GLEAN_10032441 PgMYB158
MMAEAWAQVLLPSTAPCFSGQPSCFWQDRNAGFGGIGDGWTAEENKLFEQ
ALARIDRNAPDKWERVAEMLPKKTAVDVMNHYHDLEYDVGFIEAGLVPFP
HYSSSPPSSGFTLEDWDGGDGGFRRGYCLKRARGPDQERKKGIPWTEEEH
KLFLMGLEKYGRGDWRNISRKYVTSRTPTQVASHAQKYFIRLNSGGKDKR
RSSIHDITTVNLTDEDRGNASPPSAAAASPSPRRSRACSALRTPTAA
>Pgl_GLEAN_10032472 PgMYB159
MSAAPETAVSPAPQPEPPSDPPVVSDAAHSNPAPMEVDTQTLAEPQPQSQ
PQPTPSSPPPSGEDDDVVAVSGASVGGDAADSAAAASNATAEERVRGPWS
PEEDTVLSNLVEKLGARNWTLIARGIPGRSGKSCRLRWCNQLDPQVKRKP
FTEEEDRIIIAAHAIHGNKWACIAKLLDGRTDNAIKNHWNSTLRRRYCND
GRCKHGGSVERSIPEVSRAVSKEPWPSKDLSSFTAMDVRDAPVKIVPETS
AGAWHVADQYYSTQAVDPPYLSRPAAKIGAFRPYNPGPAEPTQQETPSSV
FKFDSTLKALTPESEVFKFAGPTYFAAEVPNKCGHGCCSTHQRPHKNSLL
GPEFNEFEDHPPILNSSFASLVSEISSIAWMRSGMQSGDASSLLQSAPPG
ASLTN
>Pgl_GLEAN_10032520 PgMYB168
MGRAPCCDKTSVKRGPWSPEEDELLRSYVQNQGTGGNWIALPHKAGLNRC
GKSCRLRWLNYLRPDIKHGGYTEQEDRIICSLYNSIGSRWSIIASKLPGR
TDNDVKNYWNTKLKKKALAMNHHHHQQQQEYYHHQRGSGGRGRGRRKAFS
LAEFSPAPPPQPTGAATIINSWAGGLAIDDMFLPELLGVGDFPPGDLLLG
GGGFPPLLHQDRASSLQELAACYFPNAQAAEMWAAADHVKPSPAGLCHSL
T
>Pgl_GLEAN_10035445 PgMYB173
MGREAATKTRPKLRRGLWSPEEDEKLYNHIIRYGVGCWSSVPKLAGLERC
GKSCRLRWINYLRPDLKRGSFSQQEEDLIISLHKMLGNRWSQIASQLPGR
TDNEIKNFWNSCIKKKLRQRGIDPATHKALDDDASRAANNAGEVPRDDCS
QLRAATDDHCFAMGGASSDPLASQSPTVSFDPLSVTNVQAMQGSYAAVHS
FQSADHLCDYGGVDLASDAGTYSAYTGGGADSSSNSNGTWTCGGNIVGGG
EPMPQPHMDMFGRDADGAYHLFDPAKYSPWQHHEAARLHDGGGGAGSFPI
RSMSRDLPDSCFDLARSSLEDEFCVDFL
>Pgl_GLEAN_10036207 PgMYB190
MQQNGHYELHPVDHHPFEAIGDYVPIGSMVPPATFNDLGHHQYFSERDIK
KPIFSHASSTCHRVGSQLPMSLTPKTEVSHLIESGLRSYKAYETSDRKLV
KLVEQFGLRKWSYIAQMLPGRVGKQCRERWHNNLRPNIKDPLCGTKHTVM
LAEKLDLCWNVRPPSAVHLGGGRASPVAADVPAQVDNYMDEISTREISTR
DLQGNVRARFRAAEVDSILLIAEDQ
>Pgl_GLEAN_10036366 PgMYB167
MTRKQPAARRGGGVAGAGVKKGPWTPEEDKLLVDYINENGHGSWRTMPRR
AGLLRCGKSCRLRWMNYLRPDIKRGPIAADEEDLIVRLHRLLGNRWSLIA
GRLPGRTDNEIKNYWNSHLSKKLPPVAPPPEQPGSSSGAGSFGDGAMTGL
NADVFEGLDDPFCAQDGAGRGGFNTGCAMADDGTFSTFLDLLVSENQLAD
YFGDHENADGGGNDQTRA
>Pgl_GLEAN_10037254 PgMYB162
MYRVKSESDCDMMLQDQMDSPVADDVSSGGGSPHRGSGPPLKKGPWTSAE
DSILVDYVKKHGEGNWNAVQKNTGLFRCGKSCRLRWANHLRPNLKKGAFT
PEEERLIIQLHAKMGNKWARMAAHLPGRTDNEIKNYWNTRIKRCQRAGLP
IYPASVCNQSSSEDQQVSGEFNCGENISNDLLGGNSLYLPDFTSDNFIAN
TEALSYPPHLSAVSIGNLLGQSFAAKSCSFMDQVDQAGMLKQSGCALPAL
SDTIDGVLSSVDQFSNDSEKLKQALGFDYLNEANASSKTIAPFGVALSGS
HAFLNGNFSASRPINGPLKMELPSLQDTESDPNSWLKYTLAPAVQPTELV
DPYLHSPIATPSVKSECASPRNSGLLEELLHEAQGRSGKNRQPSVRSSSS
SANTPCETTTVVSPEFDLCPEYWEDHHSSFINECTPFSGYSFTESTPVSA
ASPGIFQLSKISPAQSPSMGSGEQAVEPIHESAGSPHPENLRPDALFSGN
SADPSTFNDAIAILLGSDMTAECKPVLGGGITFGSSSWSNMPNACEISEF
K
>Pgl_GLEAN_10037339 PgMYB163
MGRSPCCDKTKVKRGPWSQEEDAVLRSFVERFGNAGNWISLPQKAGLKRC
GKSCRLRWLNYLRPELRHGGFTDDEDNLILSLYGDIGSKWSVIASRLPGR
TDNDVKNYWNTKLKKSQSQRDEPPPPPTPPPITNKLHGSEYTGARGGATV
DDDALLLKSEQLYAELVGLIDQQQQPSSSGTTSPTTASSSGSCGSTSTTT
VWPSMGVQDTTLLSESSSSLFDAYSFQDLLAASYDQFTAVTQELQYY
>Pgl_GLEAN_10000710 PgMYB192
MYQQQQLHSHNQHLPSSGPGLPPEKQFLLQGGDAGLILSTDAKPRLKWTP
ELHERFVEAVHQLGGPDKATPKTIMRLMGIPGLTLYHLKSHLQVQRHLQL
RIEAQGKYLQSVLEKAQEALASQNVDLGAGVLGAAAAAETQQLSELISRA
SATDKCGHHQHPGGVGDGSVDSCLTACEGSQRDHDMLSIGLSSPPPAPTP
RGGGGGYPFEAARSSGNERRGGGGGASTSCCEEFLFLEEHGTGSGRGGRS
SSSDEQQQELDLNIKGSNTTRRPRNCDEKIDLNGSSWN
>Pgl_GLEAN_10001403 PgMYB199
MGRSPCCEKAHTNKGAWTKEEDDRLVAYIKAHGEGCWRSLPKAAGLLRCG
KSCRLRWINYLRPDLKRGNFTEEEDELIIKLHSLLGNKWSLIAGRLPGRT
DNEIKNYWNTHIRRKLLSRGIDPVTHRPINEHASNITISFEAATAAAAAA
REDKGAVFRLEEPKAAGAAAIGRDQIINPAGDWGQGKPLKCPDLNLDLCI
SPPPCPEEQPLIMKPVKREAGLCFSCSLGLPKSADCKCSNFLGLRTAMLD
FRSLEMK
>Pgl_GLEAN_10001965 PgMYB191
MAPRDQREVSSDEDSAPAGDLRRGPWTVEEDLLLVNYIAAHGEGRWNALA
RCAGLRRTGKSCRLRWLNYLRPDLRRGNITAQEQLLILELHSRWGNRWSK
IAQHLPGRTDNEIKNYWRTRVQKHARQLNCDVNSQRFKDLIRAAPSAAFG
ESAPSGNTDSNSTAAVWDTLYCQPPPPPTTAAAETACSWSDESLLGDMGM
GLPELGDDTMLWGAAGADDLWYTQIMGL
>Pgl_GLEAN_10010237 PgMYB201
MYLPKAEASFGSAHTNSVANQQQMESAGNNIGPSNGANNNNNLAARQRLR
WTNELHERFVEAVTQLGGPDRATPKGVLRIMGVAGLTIYHVKSHLQKYRL
AKYIPDASTDGNKADNKDPGDLLAGLEGSSGLPISEALKLQMEVQKRLHE
QLEVQRQLQLRIEAQGKYLQKIIEEQQRLTGVKSETPAAGASVTVSSDQF
PDSERTEPSTPAPTSESPTQVGASNRDTGEQTEATKRTCNSDSLSRHEPL
TPDSNCQNGSPPASPNHERASKRQRGSGNEFLDAETDFSLPGHIFESSSG
PEFEQYSMSYSGH
>Pgl_GLEAN_10013308 PgMYB195
MATGPDLSSSSGAAAKKDRHIVSWSAEEDNVLRAQITLHGTDNWTIIAAQ
FKDKTARQCRRRWYNYLNSECKKGGWSREEDMLLCEAQKLLGNRWTEIAK
VVSGRTDNAVKNRFSTLCKRRAKDDEPVEENGTPCSNTNAKRVLTQTGSD
LKENIVPNMRLFGQEKGAHEDTRQPLAALSSNNQQNVNTVKSHNLVTTTT
KPLLGREQHCVKQDGNFMNKDDPKVAILLQQADLLCSLATKIKTDDTCQS
MDEAWQQLQHHLVKKDDNGMSENSESGIASLLEELDDLIVDPYESKEEDE
QKMREQNGQRQADVENEHCTGPSQASMEVTSNMAPDEMMEDHTVHNCKEV
SNLCRNMLSGSTESCLEAKTGAKLPASENLSEVAADNRLQRVESTSPGLT
DFDDFIIDPYENTEEDEQVIREQNGHIDAHDNQSYGHSQATMELTPGMTP
DELMEACPVDSCKEDNSLCINVLSGSMEPCPGEEKAASANLSEVAEESRL
QCIDSTSPVLANFHTKECGETQAPEKPSEVVEDNRPQCVEFASPAHTVLR
AKADSETFASPRSAVVAKDNKLPSMEFTSPAHTVLRAKAGAETFASPRSA
VVAKDSKLPSMEFTSPAHTVATFQPYTDNAGDMPTPKFTASERNFLMSVI
ELTSPGSRPETSQQPSCKRALLNSL
>Pgl_GLEAN_10013916 PgMYB198
MGHHCCSKQKVKRGLWSPEEDEKLVKYITAHGHSCWSAVPKHAGLQRCGK
SCRLRWINYLRPDLKRGTFTDQEERTIIDVHRILGNRWAQIAKHLPGRTD
NEVKNFWNSCIKKKLIAQGLDPKTHNLLPASRSLLHGNGAANPSNNPAQF
HSNGATANGGATTPFTISSPTKAAAYDAVTAPPPPEISAPAMYDVVPNPA
GMLMGHDHAAIPAGYPYLDNGGGVLMSFRDQNAGLQTSMDFMNGSSSSSS
MDHAAGMPNGNGFSQGMGAAFMDVTAGMWTTAVDSSMCAGIEVVQQQQPP
PPPLQPQGLIQGEVIGRPAVMNGGGAAADKGLELDMMDVSSVYGGAGATA
AFDLELMESCGLFCGGVGGAGNAMEQLQWDC
>Pgl_GLEAN_10015650 PgMYB193
MARRASGPKKKLRRGLWSPEEDEKLMNHIAKYGHGCWSSVPKLAGLERCG
KSCRLRWINYLRPDLKRGAFSQEEEDLIIHLHSMLGNKWSQIAAQLPGRT
DNEVKNFWNSYIKKKLRQRGIDPDTHKPLAEASSSRGDAELILSSPAGQH
MPPPPPPVAAESYVYSRSISADGGASDGSLQSLSEYNGDFAAGYLQDSDP
LQQGGPPPLVLPSVSSSSTLNSMAGLSPAAATATDEQCNNNCSSGGGGNG
SFELSTQQSCSPSQLPWLELGTSSGAAAALDQYGAALDELKWSDYVFDGY
GGGGQYQQGQCIYGDSKDAAQFVDASGLSSSWCLN
>Pgl_GLEAN_10015781 PgMYB197
MGRAPCCEKSGLKKGPWTPEEDEKLVDYIKKNGQGNWRTLPKNAGLARCG
KSCRLRWTNYLRPDIKRGRFSFEEEETIIQLHSILGNKWSAIAARLPGRT
DNEIKNYWNTHIRKRLLRMGIDPMAQAAAAMALPQQQADHQFMSHQQQQA
AGAACQMPDLVHANPTTVQQQLAATAAQQHHQDMAAAACNSMQAPLTGYV
DGLDDVPALMQMVQQPDASNLQQWSSTVTSSNNNNNNVGSGVSTPSSSPV
AAGLNHHSAATAYGGGASGISSDDAAALFGMHQLSELLDVSDYM
>Pgl_GLEAN_10016493 PgMYB196
MHYDAFAGAAAPPPALDASPEPEPEPEPKWTRRDDKFLELLCFTRNTVDF
HKGASIIGKTEEQMNQRCAFLFAELSHVLESLEVSTPPVWDMETAVMPAT
PAAEEVVPGAVVPAAPPVAAVESSAARAVGAGGSARKRKKKKAEKWTDYE
HRRFLAGLPLYKGNWNAMSREYLPSRTASQIASHYQKYQKREKQREQDKC
KRASIHDITEPGIAAAIAPAVSSGGEPAAQGELPRSDATARGEENELLEP
IGSGEDGLSPVEEFPEDDLCSRR
>Pgl_GLEAN_10016737 PgMYB208
MGRQPCCDKLGLKKGPWTAEEDQKLVSFLLNNGQCCWRAVPKLAGLLRCG
KSCRLRWTNYLRPDLKRGLLSPEEEKTVIDLHAELGNRWSKIASQLPGRT
DNEIKNHWNTHIKKKLRKMGIDPATHKPLQQQLAADAGGSPEEEAKAVAA
GIAPPPGAGHEAFCVDEVRMARLLDDIVIPDGDVIVDAPPAANGSGISTA
YSPESSSSSSSSSSGGSSIVDGEWPEWPQMVEWPESTMWLDDVVTVPTPW
EFEDAFLTDQRIALFEHQETWNTVSRVELF
>Pgl_GLEAN_10016741 PgMYB207
MGRQPCCDKVGLKKGPWTAEEDQKLVSFLLNNGQCCWRAVPKLAGLLRCG
KSCRLRWTNYLRPDLKRGMLSEEEEKTVIDLHAELGNRWSKIASHLPGRT
DNEIKNHWNTHIKKKLKKMGIDPATHKPLQPAPDLRQDPTGGSPAEEEKM
IVTAGHEAQLLLNDDIVFPADGEELGAQPAPSDGIATCTAYSPEQSSSIS
SSSSCSASVAAASSGGSDSVNGEWPDWPPVLMDWPAESMWQLEDVVTGRT
PWEFEDPFVTYQRIALFDHQETWNNSKVELF
>Pgl_GLEAN_10016742 PgMYB206
MGRQPCCDKVGLKKGPWTAEEDQKLVSFLVNNSQCCWRAVPKLAGLLRCG
KSCRLRWTNYLRPDLKRGLLSPEEEKTVIDLHAELGNRWSKIASQLPGRT
DNEIKNHWNTHIKKKLRKMGIDPATHKPIQPAPPQQEEDKTAAGLGKEAF
SISEVPMVHLLDDVVLPCDDLVAGTPPASNSGIDTAYSQDSPSSSSSYSG
SAAASSSSSSVVQGQCQDWLEWAESMLLDDVVTTPAPWAFGDPFVTYQRI
VLFDHQETW
>Pgl_GLEAN_10019811 PgMYB200
MGRQPCCDKLGVKRGPWTAEEDRKLINFILSNGHCCWRAVPKLAGLLRCG
KSCRLRWTNYLRPDLKRGLLTDAEEQVVIDLHAKLGNRWSKIAAKLPGRT
DNEIKNHWNTHIKKKLIKMGIDPVTHEPLHQSTSSPATPSQSVVSADSTS
KSDKATKEQSPASDVVVVVRGVLVAPADSSSPTESSTNTASTGGGSSSSS
SGSHDQDPLVKWLLEEDPPTGDEPWLDFTGSVDVDEFSSIAAGPELPWDG
ATDWLLDYQDFGLGGSSLVVDGYMINGSNGAKF
>Pgl_GLEAN_10019884 PgMYB204
MDFYSDDSDPDIDEDLQEDLDALRRSCILSGADPDAAVAQGSSSPRPICT
WPPSDTDEDEDDLETLRAIQRRFSHYQSSTSTSSPTTMKPEASQGVHSEF
FADRNEDESAAQKQNANTHNRAGFPKAALLLVDALKKNRACQKLIRRKLI
NIEAKIEENKDLRDRVKCLLGYQLSCRRSTGRSLSQKEDPRIRLISSRKP
TQISEKVLPYICIGCCMIRFPVLVKTLFSKIYACLLDLDLLEMYNKPTYG
REFYSVQNNNRKTPALFLGPADNPHVLKYKMVLEQLPMSFKKQTWSDAEK
DKLARGIKQQYQETLILDSLNNGSAIGDFSAVDMAYALTNGAGNFEVTPE
SLRSVLPLINWDKISAMYLPGRSGAECESRWLNCDDPLINREAWTAQEET
KLILIIQEKGLYNWINIAATLGTYRTPFQCLVRYQRSLNPHIINKAWTKE
EDIRLQAAVHTFGEKWQLVSASLDGRTGSQCSNRWRKTLHPTRTRVGRWH
SDEDKRLMVCVKLIGSGNWSKIAPFIPGRTQTQCHERWNNILDPNIDLGK
WRPEENSKLLAAVSEFGPCWSKIAMNIIPGRNDSMCYRQWKKLCKHHLPA
VKAAIQLKKSVFQTNFVDREKERPAIAPRDLISLVQSKGDETDENKRDRS
RKQTKENLAASNVVNSSAAPDCGAANTISNTNSRRPSRKSTGRSKKQNED
NVAVPDGLNNLSSSSNRSRKRKSTTGSNAAVQKRTRGSVPVGNEAVPIES
RATVSADNEVETNIIMDPLSVCEEGVVKKRTRGSKPAGNNAASHKRIRGS
IPEGNKVVPIEDSANDEVGTNGMMDDPASVSEEGVVKKRTMRSKLAGGEG
AARKRKCTISADNEAGMNTRDPVSGEEEVVKKRKRCSKPVSNEGAARKKL
RAPVSVGDEGVVEKRTGSVATENYGNATKRKRAPSRRKSAEDNLTTERPA
NATPELDLPIVPSEERVVDAGNMDKGRRKSTPSDIFPCIRGLQKAMLERV
FTSGDFASGEYSLQVECPKVEKRHLAVFRLKVRKNVLIVLSVQGGAEQAG
VSLGTLPLRSRFLSARNLVQTEPVPLDVIS
>Pgl_GLEAN_10021694 PgMYB205
MERLRTNQLYSSGVPVTVPTSLPCIPVSLEESFPKLPDSQNVLIERELRS
TPLPPHQNAVAPIRGQFHSSTGSVGPLCSPPAVRFSSVSNPELSNPNPYN
SQVPSTASSSTLNYGSQYGGFEPSLTDFPRDVGPTWCPDPVDSILGYSGD
VPGGNNLTVSTSLEVSEDLTKQTEWWTELMNDDWKDIADNPASAETQQVG
PPAQSSISVHQSASQQIVLSQPGEPMAVVAPSPTAGSSTAKARMRWTPEL
HERFVDAVNQLGGSEKATPKGVLKLMKADNLTIYHVKSHLQKYRTARYRP
ELSEGSTEKKVASKEDIPSIDLKGSFDLTEALRLQLELQKRLHEQLEIQR
SLQLRIEEQGKCLQMMLEQQCIPGTEKATDASTSAEGSKLSSEILESSTA
KEVPETSPNGITKQTESSDTQ
>Pgl_GLEAN_10029677 PgMYB203
MDRKFNGEWSASEIEMVKSLIHSHNPNNNYSDATNKNHNDIVNHIQVRFP
WKERHQVIGLYIDLVADTMSQSQSGNHSVVETKNIVNGNSKIPMGDPSID
NMALSFAHVTDKAPKAMRNKGSFWTKEEHRQFLCGLCAYGRGKWKDISRD
FVTTKTPVQISSHAQKYFRRQNSSKKQRYSINDVGLYDVEPSMQSNTSSW
KAPAFAGGAYNPIYYGPGSQVATMNNLAQVWPPLIYSADQASSSQATTWT
GQRMGPSSSAALTPEGAGRKMVWTSDLKGDILPKQWMKTDNV
>Pgl_GLEAN_10029681 PgMYB202
MDPKFNGEWSAYEFERVKSLIASHNLDNNYGDGTNNKHNDIANDIQALFP
WKERHQSGKHSVVAINILVNDNTGILVEDPSIDNIDLWFVHMMTDKIPEA
MQMVDEVSKSKTIHPQQHRQNKGSFWTYEDHRQFRYGLCKYGRGKWKDIS
REFVTTRTQVQVSSHAQKYFCRHNTSEKQCYSINDVGLYDSKPWAQNDVG
LHDSKPWAQNNSSS
