# Supplementary material for: Genome-Wide Identification and Transcriptional Analysis of the MYB Gene Family in Pearl Millet (Pennisetum glaucum)
Source: Int J Mol Sci. 2023 Jan 27;24(3):2484. doi: 10.3390/ijms24032484 (PMC9916650; doi:10.3390/ijms24032484)
Supplement: Supplementary file 1 [file ijms-24-02484-s001.zip › File S2. CDS of 208 PgMYB genes.txt]

>Pgl_GLEAN_10012352 PgMYB1
ATGGTGACTGTGAGAGAGGAGATGCGTAAGGGGCCATGGACAGAGCAGGA
GGACATGCAACTGGTATGCACTGTCCGCCTGTTCGGTGACCGTCGTTGGG
ACTTCATTGCCCAAGTCTCAGGCCTGAACAGGACAGGAAAGAGCTGCCGC
CTCAGGTGGGTGAACTACCTCCACCCTGGTCTCAAGCATGGCCGCATGTC
ACCGCAAGAGGAGCACCTTATTGTTGAGCTCCATGCTCGGTGGGGGAACA
GATGGTCGAGGATAGCACGGAGGCTGCCAGGGCGCACAGACAATGAGATC
AAGAACTACTGGAGGACACACATGAGAAAGAAAGCACAGGAGAGAAAGAT
GAGCATATCACCTTCATCCTCATCCTCCTCATTGACATACCAATCCTGCC
TTCTTGACACCTCTCCAATAATTGGGATGGGTAGTGGTGATACTCACAAT
GGCAGTAGCTGCATCACCAGTGCCCTTGGCAGCACCCAGAGTTCCATGGA
TGCATATCCCATGGATCAGATATGGAGGGAAATTGAGGCACCGCAGGCAC
CTGCCTTGTTGAGCATTGCTGAAGGAAAAGAAAAGACATGCAGCAGTATC
CCCTGTCCTCTGCCATCACCTGCTATGTGGGATTATAAATGCCCTGAGAT
ATTCTGGAAGATGGAAGACGAAGAAATAATGATGCTGGCTCCATCATTTG
GTAATGGTAAATAA
>Pgl_GLEAN_10025141 PgMYB2
ATGGAGATGCTGATGCAGCCGCCGCAGAGGGCCGCCGGGATCAGCGGCGG
AGGAGGCGGCGGCGGCGGAGGGGACGCGGAGGCGGAGGCGGAGGCCGAGG
CGGCGGAGCTCCGGCGCGGGCCGTGGACGGTCGACGAGGACCTGACGCTC
ATCAACTACATCGCCGAGCACGGCGAGGGCCGCTGGAACGCGCTCGCGCG
CGCCGCCGGCCTGAAGCGGACGGGGAAGAGCTGCCGGCTGCGGTGGCTCA
ACTACCTCCGGCCGGACGTGAAGCGCGGCGACTTCACCGCCGACGAGCAG
CTGCTCATCCTCGACCTCCACTCCCGCTGGGGCAACCGGTGGTCGAAGAT
CGCGGCGCAGCTGCCGGGCCGTACGGACAACGAGATCAAGAACTACTGGC
GGACGCGGGTGCAGAAGCACGCCAAGCAGCTCAACTGCGACGTCAACAGC
GCCCGCTTCAAGGACGCCATGCGCTTCCTCTGGATGCCGCGCCTCGCCGA
GCGCGCCGCCGCACAGCAGCAGCACCAGCACCAGCAGCCGGCGCCGGCCG
ACGTCTACTCCTCCCTGACGACGACGGCGATGCCGCCGGAGGAGCAGCAG
CAGCAGGACCAGGACCAGGACCAGGAGTTCTGGTCCACGGCGTCCGCGCT
GCAGCACCTCACCACCGGCGCAGACCACCACCACCACCAGCAGCAGCTGT
TCCAGTTCCATGACCTGCCGCCGCTGCAGGACCTCACCGGATGGGTGCAG
GGCTTCTCCGAGGTCGTCGGCGTCTCGCCGGCGGAGACCACCACCGCCAC
CGCCACCGCCACCACCCAGCTCTGGAGCCTCGACGACATCTGGAGGATGC
AGTGA
>Pgl_GLEAN_10019982 PgMYB3
ATGGGGAGGCCACCGTGCTGCGACAATGGCGTCGGCGTGAAGAAGGGGCC
GTGGACGCCGGAGGAGGACATCGTCCTCGTCTCCTACATCCAGCAGCACG
GCCCCGGCAACTGGCGGTCCGTGCCGGAGAACACAGGGTTGATGAGGTGC
AGCAAGAGCTGCAGGCTGCGGTGGACCAACTACCTCAGGCCCGGGATCAA
GCGCGGCAACTTCACCCCTCATGAGGAAGGGATCATCATCCACCTTCAGG
CGTTGCTTGGCAACAAGTGGGCAGCCATAGCCTCCTACCTCCCTCAAAGA
ACCGACAACGACATCAAGAACTACTGGAACACACACCTCAAGAAGAAGGT
GAAGAGGCTGCAGCAGCCAGCGGCGGACTCCTTCCAAACCCCTCCCTCCA
ACGGAGTCACCAGCCCAAACTACTATAGCCCTCCTAGCAGCAGCCACCAC
AACCTTCAAGGAATGCAACCCACCATGAACACCTACCCCAGCAGCACCAC
CTGCACCAGCGCACAGAGCAACAACAGCGAGGCTGCTACCGCCGTCTCCA
ACCTCTTCCAGGCATGGACGATGAGGCCATCACCGGTGGCGACAACAGCC
AACTGCAAGATCACCATGCAAGATTTCCAGGAGGAGCATGACGCTGCAGC
TTCAATGGTTTGCAAGGATGATCAGGTTGTGATGACAGGAGATGTTAGCA
AGTCCTCAGCATTGGAGATGGTGGTGACGCCAGCGGTGATGGGAGCGAGC
ACTACTGCCACCTTCTCGCTGCTTGAGGACTGGCTGCTCGAGGACATGCC
AGGGCAGGCCATGGATGGGCTCATGGGGATCTCTGGCGGCTGCTGCGCAG
ATCCCATCATGTTCTAG
>Pgl_GLEAN_10034693 PgMYB4
ATGGGGAGGCCGCCGTGCTGCGAGAAGACCGGGGTGAAGAAGGGCCCGTG
GACGCCGGAGGAGGACCTCGTGCTCGTCTCCTACGTGCAAGACAACGGGC
CCGGCAACTGGCGCGCCGTGCCCACCAACACAGGGCTGATGCGCTGCAGC
AAGAGCTGCCGGCTCCGGTGGACCAACTACCTCCGCCCCGGGATCAAGCG
CGGCAACTTCAGCGTCCAGGAGGAGAAGCTCATCATCCACCTCCAGGCGC
TGCTCGGCAACCGCTGGGCGGCGATTGCGTCCTACCTCCCGGAGCGCACG
GACAACGACATCAAGAACTACTGGAACACCCACCTCAAGAAGAAGCTCAG
CAAGGCAGGCGGCGCCGCCGGGGACGGCAGCGGCGGCGCTGCCCAGGAGG
CGAAGAGCGGCAGGGCACCTACAAGTCCGTCACCATCACCGTCACTCGCC
GCCTCGCCGGCAGCACGGGGCGTGCTGCTAGGCCCTGTCCTGTTGAGGTG
CCGACTGCCGAGGAAAGGAAACTTCCGTCGTCGTCCGGACTCGTCCCTCC
TGCCAGCTCTGCTTGCCCTCGACTGGAGTCGTCTCGTCAAGCCACCACCA
CGCCCGCAGCGGGGAGGCACAGTGAGGCACCGAGGCCGACGCGATGCGAG
CGAGGCGCGTGATCGATCCATGGGGATGTCAGGCAGGCCGCCGCAGCACG
GCAGCAGGCAGCTAGCTGCTGGCACCAGCAGGCACCAGGCGACGACCAGG
CGTCAGTGGTGGCGTGACACGATCGAGTGGGCCTGGGCCCCTTTCGTCGC
CCGGCAACAACCACCGCAGGCCTGCAGCAAGGACGATGGCACCGCGGTTA
GCCGCCGTCCCGCGGCCGCACGGCCGCCCGGGCGGCGCAGCCATTTTGGA
CGGTTTCTTACTTCGTGCCGGCAGATAGACCTGGCCGGGAGAGGAGAGGC
TCCTAGTTAG
>Pgl_GLEAN_10034708 PgMYB5
ATGCCGTGCTCGTCGCCGGCGTGGCTGCTGCGGGTGGCGTCGTCCGCGGC
CGCCGCGGCGNNNNNNNNNNNNNNNNNNNNNNNNNNNNNNNNNNNNNNNN
NNNNNNNNNNNNNNNNNNNNNNNNNNNNNNNNNNNNNNNNNNNNNNNNNN
NNNNNNNNNNNNNNNNNNNNNNNNNNNNNNNNNNNNNNNNNNNNNNNNNN
NNNNNNCCACTGGCGCCCCGCCGAGGACGCCAAGCTCCGCGAGCTCGTCG
CCCTCTACGGGCCCCAGAACTGGAACCTCATCGCCGAGAAGCTCGACGGC
AGATCAGGGAAGAGCTGCCGGCTCCGGTGGTTCAACCAGCTGGACCCGCG
GATCAGCAAGCGCCCCTTCAGCGACGAGGAGGAGGAGCGCCTCATGGCGG
CGCACCGCTTCTACGGCAACAAGTGGGCCATGATCGCGCGCCTCTTCCCG
GGCCGCACCGACAACGCCGTCAAGAACCACTGGCACGTCATCATGGCGCG
CAAGTACCGGGAGCAGTCCACCGCCTACCGCCGCCGCAAGCTCAACCAGG
CCGTCCAGCGAAAGCTCGAGGCCGTTGCCGTCGCAATGCCGCCGGCCGCC
GGTCCCGGCGCCGGGGACGCTNNNNNNNNNNNNNNNNNNNNNNNNNNNNN
NNNNNNGACGCCGCGTACGGCTTCCCCGACCCCTACGGCTTCGGCTTCCG
CCACTACTGCGGCTTCCCGTTCCCACCAGGCGCCGCGTCGCCCGAGGACC
ACCTGCTGCCGCCGCCGCCGCCTCCCTTCTGCCTGTTCCCCGGTGAGCTT
GCGCGCTCCCCCCTTAACACTCACTCCCAACTAG
>Pgl_GLEAN_10034717 PgMYB6
ATGGGGCGATCACCATGCTGTGAGAAGATTGGCCTGAAGAAAGGTCCATG
GACGCCGGAGGAGGATCAGAAGCTACTTGCCTACATTGAGGAGCATGGCC
ATGGGAGCTGGCGAGCGTTGCCTGCGAAGGCAGGCTTGCAGAGGTGCGGG
AAGAGCTGCAGATTGAGGTGGACAAACTACCTGAGGCCGGACATCAAGAG
GGGCAAGTTCAGCTTGCAGGAAGAGCAGACCATCATCCAGCTTCATGCTC
TTCTTGGTAACAGATGGTCGGCCATAGCAACACATCTACCAAAGCGCACA
GACAATGAAATCAAGAACTACTGGAACACCCATCTCAAGAAGAGGCTGGC
CAAGATGGGGATCGACCCCGTCACCCACAAATCTATGAGTGGCACTCTCA
CCGGCACCGCAGACGATAAATCAGCCAAGGCTGCAGCAAGCCTCAGCCAC
ATGGCTCAGTGGGAGAGCGCCCGCCTCGAAGCTGAGGCACGGCTGGCTCG
AGAGTCGAAGATGCGAACACCAGCACCGACACCAATCGCACTCCATGGGC
AGCAAACGAATGTACCTGCCTCCACTGCTTCTTCACACCTTGACGTGTTG
CATGCATGGCAGGGTGCAAAGATAGACCTGGAGTCACCTACCTCCACACT
GACGTTTACAGGGAGCAATAGTGGCATGCTGCCAACCCCCAGGACCAACA
GACTAGAGGTATCAGAAAGCAACTCTGTGATGTGGCAGAGGAGTGATGAA
CTGGAGGGTGAAGAAAGCGATTGGCCGTTCTTCAGCAAGCACCAAGTCCT
GGAACTGGAAGGCAAGGAGAGGGAAGAGGACTTCACTGGCTGTGAAGAGG
CGTGGTTCTCAGGAATGGCTGGCTTCACAGGCATGCTGCTTGATGGATCC
AATGAGCATGATGCATCAGAATGCTGGGGTGAGTCCAGCAATGGCCAAAC
TGAGCACAGCAACCAACCATCAGATGAGGAAGACAAGAATTATTGGAACG
GTGTCCTCGGCATGGTGAACTCAGAGCTGTCAGCCCAGTCACCCCCATCC
CCATTGGTCTAG
>Pgl_GLEAN_10031720 PgMYB7
ATGGGGAGGCAGCCGTGCTGCGAAAAGGTGGGGCTGAAGAAGGGGCCGTG
GACGGCGGAGGAGGACCAGAAGCTCGTCAGCTTCATCCTCGGCAACGGCC
AGTGCTGCTGGCGCGCCGTGCCCAAGCTCGCCGGGCTGCTGCGGTGCGGG
AAGAGCTGCCGGCTGCGGTGGACCAACTACCTCCGGCCCGACCTCAAGAG
GGGCCTCCTCTCCGACGCCGAGGAGAAGCTCGTCATCGACCTGCACGCCC
AGCTCGGCAACAGGTGGTCAAAGATTGCGTCGCAACTGCCGGGGCGAACG
GACAACGAGATCAAGAACCACTGGAACACCCACATCAAGAAGAAGCTCAA
GAAGATGGGGATCGACCCCCTCACACACAAGCCGCTACCGCCGCCGCAAG
AGCACCAGCAGAGTCCACCGCCCGCCGCCGGCGTCTCGCCGGAAGCTGAT
CAGCCGCCACCACCGCCTCCGTTGGAGAGGAATAATCCTGCAGAGGAGAA
GGTGGCGACCACCGCGACGGCGAGCAGCAGCGAGCACGGCGACGACGAGG
TGCTCCTCCGCAAGTCCCCCGGCTTCTGCACCGACGAGGTGCCGATGATG
CACCCGGACGAGATCATGGTGCCACTGATGAGCGATCATCATCCGCCGCC
ATTACCAGCGTTGACATACGGCCCCACTGCCGCCGCCACAGCTGCCGCGG
TCTCGACACCGACGACGTCCTACTCCACCTCGGGGTCGTCGTCCAGCTTG
ACCCGCGACGTGGAGTCGCCGTTCGCGTTCATGGACATGGGCTTTCAGGA
GTTCGTATTCCAGACGGGGCTAGACGACGACATGCTGAACGACGCGCGGT
GGCTGTTACCGCCGCCGTTGTCGCCGTCGCCGGCCTTCGAGGACTTCGAT
TCCTACCACCAGTCGCAGAGGAACGGCGCACTCTTCTCTAGTTATTAG
>Pgl_GLEAN_10020657 PgMYB8
ATGTTCAATAATGAGTGGAGTGACACCAATATCAGTATGGTGAAATCACT
CATTGCTAGTCAAGTTGCCAACAACAGCTTTGCCAACGACACAAACAATA
CTCACAAAGCCATTATGAAGGAACTACAAGCATGGTTTCCCCAAAAGGAG
AAGGGTAAGTTAATTGAACTGTATGTTGAGCTCCTGGTGGAAATGATGCT
GCCAGTACAAAGTGGAAACCACTCTATTGTGGCAACCAACAACCTTGCAA
ATGACAACTTTGGGATTCCGATGGAGGATCCACCCATGAAAAACATGGAT
ATGTTGCTTGCTTGCTATTTGACAAATAAGATGCCGAAGGCCACAGGGAT
GGTAAAGGAAGCACCTCAAAGGCGAGTAATCACTCTTCGCCAAGAGAAGC
AACACAAGGAGGGGCCTTGGACCATGGAGGAGCACATGCAATTTCTCTGT
GGTCTAGAAGTGCACGGTCGTGGCAACTGGAAGAACATATGCAAGGATTT
TGTCACCACCAGGACACCAACGCAGATCTCCAGTCATGCACAAAAGTACT
TTCTTAAGATGAAGAACAAATCTGAGAAGAAACGCTACACTATTAATGAT
GTCGGCCTCTATGATGATGAACCATGGGTACATAATGACTCCAGCAACCG
GGATGTCGACAATCCTCTCATGTTTGGTGGGGCTTATAACAACCCAAACT
GCTATGGATATGGCAACTAG
>Pgl_GLEAN_10004174 PgMYB9
ATGGATCCCAAGTTCAATGATGAGTGGAGTGCCTCCGGTATCAGGATGGT
GAAATCACTCATTGCTAGTCACGGTGCCAACAACAATTATGCCAATAACA
CAAACAAGACTCACAAAGCCATTATGAATAAACTCCAAGCATGGTTTCCA
CAAAAGGAGAAGAATCAGCTAATTGAACTGTATGTTGAGCTCCTAGTGGA
AATGCTGCTACCAGCAGAGAGTGTTGTGGCAGTCAACAACCTCATGAATG
ATAACTTTGGGATTCCAATGGAGGATCCCCCCATGAAAAACATGGATATG
TTGCTTGCTAGCTATGTGACAGATAAGACGCCAGAGGCCATGGGGATGGT
GGATGAAGCTCCTCATCAAAGGCGAGTACTCATTGCTCGCCAAGAGAAGC
AGCACAATGAGGGGTCTTGGACCATAGAGGAGCACTGCCAATTTCTCTGT
GGTCTACAAAAATACGGCCGTGGCAACTGGAAGAAGATATGCAGGGACTT
TGTCACCACCAGGACTCCAACGCAGATCTCCAGCCATGCGCAAAAGTACT
TTCTTAAGATGAGGCACACATCCGAGAAGAAACGCTACACTATTAATGAT
GTCGGCCTCTATGATACTGAACCATGGGTACAAAACAACTCTTTCATCAG
TGGGGACAATCCCATCACCTTTGGTGGTGCTTATAACACAAACTGCTATG
GACCTGGCAACCATACTGCCCCCATAAACAACGTTGCACCAGTTTCATCA
CCCTTCTTGTACAGTGCTAGCCAGGCGAGTAGCAGTCAGGTGAACACATT
GGCTGGGCAGCAGGTGGGGGCTAGTTCTTCTCCAGCTCTAGCACTAGAGG
GGCCTGGAAGCCACATGGATCTGACTGGTAATCAGCAAGGGGATTTTCTT
CCTGAGCAGTGGGTGGACATAGATAACATGTACTAG
>Pgl_GLEAN_10004173 PgMYB10
ATGGATCCCAAGTTGATTGGTGAGTGGAGTGCTTCTGATATCAGGATGGT
GAAATCGCTCATTGCTACTCATGTTGCCAACAACAACTATGCCAATGATG
CAAGCAAGACGCACAATGCCATTGTGAATGAACTCCAAGCATGGTTCACC
CAAAAGGAGAAGAGTCAGAGTAGTGCAAACCCCTCTATTGTGGCAATCAG
CAACCTTGTGAATGAAATCTCTGAGATTTCAATGGTGGACCCACCCACAA
AAGACATGGATATGTTGCTTGCTAGCTATTTGACAGATAAGATGCCCGAG
GCCATGGGGATGGTGGAAGAAGCACCTCAGAGGCAAGCAACCATTCTTCG
CCACGAGAGGCAGCACAATGAGGGGCCTTGGACCCAAGAGGAGCACATGC
AGTTCCTCTATGGTCTACATGCATACGGCCGTGGCAACTGGAAGAAAATA
TGCAGGGACTTTGTCACCACCAGGACGCCAGCCCAGGTCTCCAGTCATGC
ACAAAAGTACTTTATTAGGATGGAACGCACCTCTGAAAAGATACGCTACA
GTATTAATGATGTTGGCCTCTATGGTGCTGAACCATGGGCACAGAACTAC
TCTTTGAGCCAGGACCCACTCTCCTTTGCAGGTGGTGTTTATAACTCAAA
CTGCTATGGCTCTAGCAATCAGCTTGGCCCAATGAACAATGTTGCACCGG
TTTGGTCGTCACCCTTCTGGTACAGTGCTGACCAGGCTAGTAGCAGCCAG
GTGAACACTTGGTCTGGGCAGCAGGTGGGGGCTAGTTCTTCTCCAGCTCT
AGCACAAGAGGGGATTGCAAGCCAGATAAGCCCGACCGGCAATCAGCAAG
GAAATTTTCTTCCAGATCAGTGGATTGACATAGATGACATGTTCTATTAG
>Pgl_GLEAN_10018773 PgMYB11
ATGGGCAGGTCGCCGTGCTGCGAGAAGGCGCACACGAACAAGGGCGCGTG
GACCAAGGAGGAGGACGAGCGGCTGGTGGCGTACATCCGGGCGCACGGGG
AAGGGTGCTGGCGGTCGCTGCCCAAGGCCGCGGGCCTGCTGCGATGCGGC
AAGAGCTGCCGGCTGCGCTGGATGAACTACCTCCGCCCGGACCTCAAGCG
CGGCAACTTCACCGACGACGAGGACGAGCTCATCATCCGGCTGCACGCGC
TCCTCGGCAACAAGTAA
>Pgl_GLEAN_10001056 PgMYB12
ATGGCGATCCAGATCGGGGAGGAGAGATCCATGTTCCGTGAGCCGGTGGC
GAGGAAGTTTGGGGCAACAAGGCGCTCCTTGCATCAAGAGCTCACCAGTC
GTGCTCTCCCAACCATGGATTTGAATGTCTCCGCCGAGCACCAGACGACT
GCCTGGACGGAAAAGGAGGAAGAGGTGATTGTAGCCTTGCACAAGAAGCA
CGGCAACAAATGGGCTAAGATGGCGAAGCGCATCCCTGGTCGACCAGAGA
ACAGCATCAAGAACCACTGGAACGCGACCAAGCGCTGGCTTGTAGCGAAG
TGCCGTAGGAAGACGATTGAGACGGCTGCCGTCAGGAAGGCGACCGTCTC
CAAGGTCCTCGAGAATTACATCCGTGAGCTGCTCGACAGCGGCAAGCTGA
AGGTAGAGGGCGCCCCGGCCAGCACCGCCGCCGACCCGCCGGTGCTGGAT
CTGGATGATGACGATGATGATGATGCTGCGGCGTCGGACAGCTGGCAGGT
GGACGAAAACCCGGCCGTCACGGAGCCATCGCCGGGCTCCAACTCATCAC
CCGACGACCAGTGGTGGCTGCACATGCTGTGCGGAGGCAGCGTGCCTCCG
CCGGTGATGGAGGCGCCTGAGCCAATGCAAGACTGCGTGTACGCTACGTA
CGACGCCGACGGTTACGTGCGCTACGTGCACCTGCAGCCGACGCCGGGAC
ACAGCTACGCTCCCGTCAACCAGACCGCCGCCGCCGCTGCTGCCGGATAC
CCACTGCTGTTGTACCCGTTCGGAGGGCAGCAAGTGCACGGCCACGCCAC
CTACCCTGCAGGCAGCTACTACCAGGAGGCCGGGCCGGGCAATCGCTACA
TCAACAACAACGGCGCCGGCGGCGACGAGGCGCGCGGCGACGCTGGCTTT
GCTCCCGCGGCCGCCCCGGGGCTGGCCGGTATGCCGTTCAGTGCCAATGC
ACCAGCTGGCCAGAACAAGCGTGGCGACGGCGCCATTTAA
>Pgl_GLEAN_10027640 PgMYB13
ATGATGGAGTCGTGGATGGAGGTGCTGCCGCCGCCCTACTTCGCGGGGCA
GGCGGCGGGCGGGAGGTTCCTGCCGGACCGGCGGACGCCCGGCCCCGGTG
CGTGGACCAAGGAGGAGAACAAGCTGTTCGAGCGCGCGCTGGCGGGGGTC
GACTGGGACGCGCCCGACCGGTGGGAGCGCGTCGCCGCGATGCTGCCCGG
GAGGATGGTACCCGACATTGTCGCGCACTTCGACGACCTCGAGAACGACG
TCTGCTTCATTGAGGCGGGGCTCGTTCCCTTCCCCCAGTACGGCGGCGGG
GTGCAGAACGCCGGGTTCACCTTCGACTGGGACGGCGACGCCGGCGACCT
GGGCTTCAAGCGCTCATGCTACATGGTCGCCGGCAAGCGCGGGCGCGGCC
CCGAACAGGAACGCAAGAAGGGCATCCCGTGGACGGAGGAGGAGCACAAG
CTTTTCTTGATGGGCCTGAAAAAGTACGGCCGAGGGGACTGGAGGAACAT
CTCGCGCAACTTCGTGACGACCCGGACGCCGACGCAGGTCGCCAGCCACG
CGCAGAAGTACTTCATCCGCCTCAACTCCGGCGGCAAGGACAAGCGCCGC
TCCAGCATCCACGACATCACCACCGTCAACCTCCCCGACGACGGTGGCGG
CAACCTCTCGCCCTCGCCGCCATCCGTGCTCACTTCCGCGTCCACCCCGA
GGTCAACAGGCGGCGGCCCCGTCATCTCCGAGCAGTTCGGCGGCGTCCTC
GTCGACAGCAAGCCCACGCCGCCGCACCACTTCATGCCGCACCCCTACGG
CAACGTGAAGCTCGAGCCCGGCAGCTCCCATCACGGCGGCTTCATGGACG
ACTCTGTTCTTATGCAGATGCAATGCGGCCAGCTGCAGCCTCTCGGCTGA
>Pgl_GLEAN_10025716 PgMYB14
ATGGTGGCGGTGAAGGTGGAGGAGCCCGAGGGGAGGAGCGCGGGGAACTG
GTGGAATCTGGGGGCGTCGAGCCCGTCGCCATCGGTATCGGAGGCAGGAA
GCTATGGAGGCGGTGCGCTGATGTCGCTGGTGGAGTCCAACCCCGCGGAC
TCAGTCTCTGGTCGCAGGCGAAAAAGTGGCCCTGTGAGGAGAGCTAAGGC
TGGCTGGACTCTAGATGAGGATGAAACATTGCGGAAGGCAGTGGATGCTT
GTAATGGAAAAAACTGGAAGAAGATAGCTGAATCTTTCCCTGATAGAACA
TCGGTACAATGCCTGCATAGATGGCAAAAAGTTCTTAATCCTGAACTTAT
AAAAGGTCCTTGGACCCAAGAGGAAGATGATATCATTATCAATATGGTAG
AGAAGTATGGCCCAAAAAAGTGGTCCCTGATAGCAAGGTCACTAGATGGT
CGCATTGGTAAACAATGCCGAGAGAGGTGGCACAATCATTTGGATCCTCA
AATAAATAAAGAGGCTTGGACTGTTGAGGAGGAGAGTGTGATTGTTGATG
CTCATCGTTTGCATGGGAACAAATGGGCAGAGATTGCTAAACTTCTTCCT
GGAAGGACTGACAACTCGATAAAGAACCATTGGAATAGTTCATTGAGAAA
AAGGCTAGGTGACTACAATGCCACCAGGGCTCTGCCAGTTTCAGTGCATA
TGGGTCGCAATAGTTTTAAACATGAAGAGGCAAAGCTAACTGGTGGGAAC
TATATTGACTTGAACAAGGACCTCAATATCAATTTGGAACGCGCCTCAGA
AATAGTTGACCATTCGGAACATGCAACTCATCTGCACGCTTGCAGTTTAA
AAAATTTTAAGAGCTGTTCAGATTTTCTCTCTCTTGCTATGCCAACTGCT
CAGCCAAAAAAAATGTGCGAGGTGTTAGGAGGTGGCTATTCTGCAGCTAT
TGCTTTAGCAGGAATACAAGGGCTAAAAATGGATTCTATTCATGACAAGG
GCGCAGAAATAAATTTTGTTTGTAAAGAGCATTTGGAAAATGACCCGCTC
AATGTGGAGGTGCGGAAACTTGATCATGCAACGGATACAATGAAGTATTC
AGGATCAGCTAAGGTAGAAGGCAAAACAGTCAACAATATGTGCCAATTAT
TCTTGCCGAATAAGTCTAACTCCTTTGGTTCTCTTTGTTATGAGATACCT
AAGCTAGAAGATGTTGTCCCTTCTCACTCCCCTGTTTTTTCTACACATCA
TATACAACAATGCTGTGAGGATGGATTCTTACCACCCGTGGCCTATACTA
CCCCTTGTGGGGATGGAGAAGACATATCAGATCAACTGAGTGTTGAATCA
ATATTGAAGAGTGCAGCTGAAAACTTCCCAGGCACTCCTTCAATTTTAAG
GAGAAGAAAAAGGGAGAAAACAGCACATGGTGAAGATAGTAATGTGAAGA
GTGATAGTTTTCATACTCCCTTGGGAAAGTGCACTACAGAAAGTCCGCAT
TCATTCAAGACTGCAACATTTTTGTCCCTGGGCCCTCCAGATAACAAAGG
GTTATCTGCTGTAGGGAGTTTTGATGTTTCCCCTCCATATCGACTAAGGT
CAAAAAGGATGGCTATCTTGAAAACCGTTGAGAAGAAGCATCTAGATTTT
TCATCAGATGAAATGTATACTGATACTATGGAGAAGTATTCTTCCTGTAA
GACTGAATGCACCAATACCTACACAGATGTTTCAAGCAAGCAAGAAATGA
AAATGACAGAGCATATAGTTGGCATGGAAACTTTAGCCAAGGACTTTACA
TACACAGCCAAGTTAGGTCTGATTTAA
>Pgl_GLEAN_10035698 PgMYB15
ATGGAGCAGCATCTGTTTTTGCGTGGGGGAAATGCCCAAGGAGATTCTGG
GCTAGTTCTCTCAACTGACGCTAAACCAAGGCTGAAATGGACACCTGAGT
TACATCAGCGATTTGTAGATGCAGTCAATCAATTAGGTGGAGCTGAGAAA
GCTACTCCAAAAACAGTCATGAGGCTCATGGGCATTCCAGGACTCACCTT
GTACCATCTGAAAAGCCATCTCCAGAAATACAGACTTAGCAAGAACCTCC
AAGCTCAAGCGAATGTCAGTGCATCAAAGAATGCCATAGGATGTACAAAC
ATTGCTGAAAGGATGCCCGGAACAAGTGCACCAACAATGAGCAGTACAAA
TGCCACTCCACAGGCAGAGAAGACTATTCAAATTGGTGAAGCACTTCAGA
TGCAAATCGAGGTTCAGAGGCAGCTAAATGAACAGCTTGAGGTGCAAAGG
CATCTACAACTACGAATAGAAGCCCAAGGGAAGTACTTACAGGCAGTTTT
AGAGCAAGCACAAGAGACACTTGGAAAACAGAGTTTGGGTCCTGCAAACC
TTGAAGATGCAAAAATAAAAATATCAGAGTTGGTGTCACAAGTATCAAAT
GAGTGCTTCAGCAATGCAATTACAGATATAAAAGAAAGTTCAAGTGTGCA
CAGATTAGAGCCCAAACAAATCCAGTTTGTTGAAAGCTCAACAAATAATT
ATTTCACTGCAGCTGAAGGATTCATCAAGGAGCACAGACCACACCATCAT
GGAGTACTAAAAGCATATGATGACAGTTCATTATTTTGCAGAAAAGGATC
TCATGAACATGAGATCCCGTTGGCCCTTAACAGAAGCTTAAGTGAACGTA
GGATGGCTCATTTGCAGAATGAGAAAGGGTACAGTAAAGCAGAGTTAGGG
TATGAAAGTGATACAGAGATGGCACCTGAGTATATTGGACCTCAAAATAA
TGGTGGAGGTAGCACCACCAGTTCAGCCTCAGGTAGCAAAGGAGATGCAG
AGAAGCCATATCTTGAAGAACCAAACTGCACGAGACAGGCAGTTGAATAT
CCCAGAGAGAGCAAACTACTAGACTTTGAGCACTCGTGTCCAGGGAAGAA
GCTTGACCTGAACACCCACAATGTCGATGACACCGATCAAGCTTACAGAC
ATTTCGATTTGAATGGTTTCAGCTGGAGCTGA
>Pgl_GLEAN_10013674 PgMYB16
ATGGGACGGCTCTCCTGCAGCGGCGGCGGCGGCGTTCAGCCCAAGCTCCG
CAAGGGGCTGTGGTCGCCCGAGGAAGACGAGAAGCTGTACAATCACATCA
TCCGACACGGCGTCGGGTGCTGGAGCTCCGTCCCCAAGCTCGCAGGCAGT
CTGCAGCGCTGCGGCAAGAGCTGCCGCCTCCGGTGGATCAACTACCTCCG
CCCCGACCTCAAGCGCGGCAGCTTCTCGCAGCAGGAGGAGGACCTCATCC
TCGCGCTCCACGAGATCCTCGGCAACAGATCGCGTCGCACCTGCCGGGGA
GGACCGACAACGAGATCAAGAACTTCTGGAACAGCTGCCTCAAGAAGAAG
CTCCGGCAGCGCGGCATCGACCCGAGCACGCACAAGCCGATCGCCGCCGC
TGACCGACAGCTTCGGCGGCGGCTTCGACGCGGCCGGCGCCGCATTGTAC
GGCCACCTGGTGGGCGGCGGGAAGCAGCAGGACTCAGCGGGGTTCGTGGA
CTACAGCAGCGTGCTGGACGTGTCGGAGAACCTGGGCTACGGCGAGAGCT
CCAGCAACAGCAGCAACTGGACCTGCACCGAGATGGGCGGCGCGGTGCTC
GACAGCGAGGTGATGCACTGGGCCTCATCCGGCTGCGCCGCCACCGCCAC
GAAGCAGGAGCCCTACACGGAGCTGGAGCGGCTGCACAGCGGTGGCTACG
GCGGCGGCGGGCAGGCGGCGGACGACGACGACGACGCGCTGGAGGTCAAG
TTCGCGCTGCCCTGCGGCGGCCAGGAGCAGAGCCTGGCGCATTTCGACTT
CAACTTGGAATACTTCTGA
>Pgl_GLEAN_10015908 PgMYB17
ATGGGGCGCGCGCCGTGCTGCGACAAGGCGAGCGTGAAGCGGGGGCCCTG
GTCGCCGGAGGAGGACGAGCAGCTGCGGAGCTACGTCCAGCGCCACGGCA
TCGGCGGCAACTGGATCGCCCTGCCGCAGAAAGCAGGGCTGAACCGGTGC
GGCAAGAGCTGCCGCCTGCGGTGGCTCAACTACCTGCGCCCGGACATCAA
GCACGGCGGCTACACGGAGCAGGAGGACCAGATCATCTGGTCGCTCTACA
GCTCCATCGGGAGCAGGTGGTCGATCATCGCGTCCAAGCTCCCCGGCCGG
ACGGACAACGACGTCAAGAACTACTGGAACACCAAGCTCAAGAAGAAGGC
CATGNNNNNNNNNNNNNNNNNNNNNNNNNNNNNNNNNNNNNNNNNNNNNN
NNNNNNNNNNNNNNNNNNNNNNNNNNNNNNNNNNNNNNNNNNNNNNNNNN
NNNNNNNNNNNNNNNNNNNNNNNNNNNNNNNNNNNNNNNNNNNNNNNNNN
NNNNNNNNNNNNNNNNNNNNNNNNNNNNNNNNNNNNNNNNNNNNNNNNNN
NNNNNNNNNNNNNNNNNNNNNNNNNNNNNNNNNNNNNNNNNNNNNNNNNN
NNNNNNNNNNNNNNNNNNNNNNNNNNNNNNNGCGACGCCGTGGCGGCGGC
TGCGGCGACGGCGCTGGACGACGTGTTTCTGCCCGACCTCGTCGGCGCCG
GCGAGCAGCTGTTCCCGTACGGCGACTTCTTATTCGGCGGGCCGCAAGAC
AGGGCGGCCTTGGAGCAGCTCTCGGCGTGCTACTTCCCCAACATGGCCGA
GATGTGGGGCGCCGCCGCCGCCGCCACGTCCGACGCCAAGCCGCCGCAGG
GCCTCTGCAACACCTTGACGTAG
>Pgl_GLEAN_10011787 PgMYB18
ATGTCTGGATCACGGAGCTCTTCTCCCAATTCCAACTCAGAGTGGAGCCG
GAAGGAAAACAAGATGTTTGAAGAGGCACTCGCCTACTACGGTGAGGGCA
CACCCAACCTGTGGGACAAGGTGTCCAGCGCCATGGGAGGCATCAAGTCT
GCTGAGGAGGTGCGCTTACACTATCAAGATCTTGTCGACGATGTCAAGAT
GATTGAGTCAGGGCGTGTGCCGTACCCCAAGTATAAGACACAGGGATTCT
GGACCCGAGGTTGA
>Pgl_GLEAN_10011796 PgMYB19
ATGCAATCCGCCGTGGATGCCGTCGCCGGCGTGGAGCAGGTAGTGGTACC
GGAGCCGGCCGTGCGCAAGGGCCCTTGGACGGTGGAGGAGGACCACATCC
TTGTCAACTACATCGCCGCCCACGGCGAGGGCGCCTGGAACAACCTCGCC
CGCGCCGCCGGTCTGAACCGCACCGGGAAGAGCTGCCGGCTGCGGTGGCT
CAACTACCTGCGCCCCGACGTGCGGCGCGGCAACATGACGGCAGAGGAGC
AGGAGCGCATCGTCCAGCTGCAGGCCAGATGGGGCAACAAGTGGTCTAGG
ATCGCCAAGCACCTCCCTGGCCGGACGGACAACGAGGTCAAGAACTTCTG
GAGAACCAAGATACAGCACAAGAACAAGAAGGAGCGCAGTGCCATCGAGA
CCATCATCACCGTGGCCGGCGTGTGCAGGGGCATGGCCGGCAGGAGCACT
CCGGCGATCACGGAGGAGGACCAAGGCAGCAGCAACTACTCCGGGCGGAC
GGGGGTCACGCAGGACTACGGCATCGTGACGCAGCAGCAGCAGCCGAGCA
TATCGAGCGCCGCGGACCATCATCTCGGCTACAATGTCCATGGGGGAGGA
GCCGGCGGCGCTGGCGCCTTGGACTTCGTTCCGGGCGAGAACTTCTGGGC
CATCGACGACTTCTGGACGACGATGCAGTCGTACCAAGGCGGCACCTGA
>Pgl_GLEAN_10011958 PgMYB20
GGCGGCTACCTCTCCGATGACGGCGCTCGCGGCGGCGCTGCGTTGCGGGA
GCGGAAGAAGGGCGTCCCGTGGAGCGAGGAGGAGCACAGGCTGTTCTTGG
AGGGGCTTGAGAAGCTCGGCAGGGGCGACTGGCGAGGCATCTCCCGGGGC
TTCGTCACCACGAGGACGCCCACGCAGGTCGCCAGCCACGCCCAGAAGTT
CTTCCTCAGGCAGAGCAGCGCCGGGAAGAAGAGCAGCGCCAAGCGCCGGT
CCAGCCTCTTCGACATGGTTCAGAATCTTGAGAGTGGAAGGGATGTATTG
CTTGCCACCGATCATTCTTCGGACTGCAAGGCCGACAGCACCTCAAATTC
TCTGTCTCCAAAGGCACCGCGCGACGATGTGCATCTGAAGGAGTCGAAGA
CGGCCATTCATGCGAGGACGACGACGATGAGACCTTCGTCAGAGAAGGCA
TCAGTTTCAGAGACGGTTACGGTGACGACGGATCAAGCTCACGGATACCA
CTGCTCCCCGCTAAACCTGGAGCTCGGCATGTCCCTGTCGACGCCATCGA
TCGGAAGCCAGCAATTCGCGAGCAATCTCATCTCATCAGGGTGA
>Pgl_GLEAN_10027871 PgMYB21
ATGGCTAGGAAGTGCTCGAGTTGTGGAAACAATGGCCACAACTCCAGAAC
TTGCAGTGGCCACAGAGGCCATGAGAACAGCATTAGTACCAGCAGTAACA
GCAGCAGTAATACTGGCTGTGGTGGCTTGAGGCTGTTTGGGGTGCAGCTG
CAGGTAGGCTCCCCTACTCTGAAGAAGTGCCTCAGCATGGAGTGCATATC
GCCGGCTGCCTACTATGGAGTTGCTGCTGCTGCTGCATCCAGCTTGTCGC
CTTCAGTATCATCGTCTTCGTCTTCACTTGTGTCAATAGAGGAGAACTCG
GAGAGGGTCTCCAGTAGTTACATGTCGGATGGCCTCATGGGCAGGATTCA
GGAGAGGAAGAAAGGGGTTCCATGGACCGAGGAAGAGCACCGGATGTTCC
TCGCCGGCCTGGAGAAGCTGGGGAAGGGCGACTGGCGAGGCATTTCCCGG
CACTTCGTCACAACGCGGACCCCGACGCAGGTGGCCAGCCATGCCCAGAA
GTACTTCCTCAGGCAGAACAGCCTCACCCAGAAGAGGAGGAGGTCCAGCC
TCTTTGATGCGGTTGAAGGTGCAAAGAAGGTAGCAATGCCGAGGATAGCA
TCGGTATCCGGGCTGCCATTCTTCCCCAGCCCATCGCCGAGGTCGGTCGA
CGACGATGCAAGGACGCATGGAGCTGTGATGCTGCCTCCATTCCTGAACC
TGATGAGCAGCACATCACCATTTGCTGCTGCTGCTGGTGGTGGTGCTTCA
CAGTCGCAGCACCCACCGTCCCTGACGAACCAGATGGCAACGCCTCAGGC
GCAACAACTACAGATGCCTGATCTGGAGCTGAAGATGTCGACATCCCGGT
TATCAGATCAGCCCGGTCCGTCCCGCAGCACGCCTTATTTCGGGACTGTC
AGGGTTACCTGA
>Pgl_GLEAN_10029419 PgMYB22
ATGGGGAGGCATTCTTGCTGCTACAAGCAAAAGTTGAGAAAGGGACTCTG
GTCTCCAGAGGAGGATGAGAAACTCATGAATCACATAACAAAGCATGGCC
ATGGCTGCTGGAGTTCTGTCCCCAAACTCGCTGGGCTCCAAAGGTGTGGA
AAGAGTTGCAGGTTGAGGTGGATAAACTATTTGAGGCCAGACCTCAAGAG
AGGGGCATTCTCTCAAGAGGAAGAAGACCTCATCATTGAGCTGCATGCTG
TCCTTGGAAACAGGTGGTCTCAAATTGCAGCACAGCTGCCTGGAAGGACC
GACAACGAGATCAAGAACCTATGGAACTCATGCATCAAGAAGAAGCTGAG
GCAGAAAGGTATTGATCCCAACACCCACAAGCCGCTTGCTGAGGCTGATT
GCAGCGGAGCAGCTCCCACCATCAGCACTGAGAGGACCTCAGGGTCCAGC
GACGTCAACCCGTCAAGCACTGGTGCTCTGGGGAACTTGAACCACCTCCT
CAGCGAGACGGCTCAATCATCAATGCTGCTGCCAGTGTATGACAAGAATC
ACCCTGAAACTCCAAACTTAGCACGCCCTAAGGTGCCTCCAAAGGAGTTA
TTTCTGGACCAGCTTACTGTTGGACATGAGAGTTCATCAACCTGCCGCTC
ATCAGGCCAAACGCTGTATTTCCCTTTTCAACAGCCATTAGGCTACAGCA
GTGAGAGTGGCAGTGGTGACGGTGCAAGTATGAACTCACTCTGGTTCAAT
CAGAATGACTTCAACTGCAGCACAATTTCCACTGTGATGCCACCAGTTTC
ACCGTCAGCCCTATCAACATCGATGGGGCTGAATCTCCCACCAGATAATC
CTCGACATGGAGGCACTGGCATTGGAAGTGCCTCTGTAGATTCCTTCTAC
TGGGATGGTACAAATCCTAGCAGCAGCAGCAGTACTGGGAGCAGAGGAAG
CAACAGTTTGGGATTTGAACCACAGAGCACAAGCTCAATTCTGGAGAACA
GTGTGTTCCCATGGACAGACATCGGACATGAAAAGGATTCAAGAGCTCAC
TTAGTAGAGGAACTTAAGTGGCCTGACTTGCTCCATGGAACCTTTGCTGA
AACGACCGTAGCCATGCAGAACCAGAGCCAATCACTCTATGATGACGTGA
TCAAGGCAGAGAGCCAATTCAACATGGAAGGGATATGTGCTTCTTGGTAC
CAGAATCAGCAGCCACAGCAACAGCTGCAGGCAGCACCGGACATGTACGA
CAAGGACCTCCAAAGAATGCAACTGTCTTTTGAGAATATCTAA
>Pgl_GLEAN_10005876 PgMYB23
ATGGGCATGGGCATGGGCGCCTTGGATGAGCTGGAGGTGCTTGCGATGAG
CCCGGGCGGCTCGGCATCGTCGGCGGCCGCAGCAGGCAGCGAGGATGAGG
GCGACCTTCGGAGGGGCCCGTGGACCGTCGAGGAGGACCTCCTGCTCGTC
AACTACATCGCCGCCCATGGCGAGGGCCGCTGGAACTCGCTCGCGCGCTC
CGCAGGCCTGAAGCGCACCGGCAAGAGCTGCCGCCTCCGGTGGCTCAACT
ACCTCCGCCCCGACGTGCGCCGCGGCAACATCACCGCCGAGGAGCAGCTG
CTCATCCTCGAGCTCCACTCCCGCTGGGGCAACCGCTGGTCCAAGATCGC
GCAGCACCTCCCGGGCCGCACCGACAACGAGATCAAGAACTACTGGCGCA
CGCGCGTGCAGAAGCACGCCAAGCAGCTCCGATGCGACGTCAACAGCCGC
CAGTTCCGCGACGTCGGGGGGGAGGAGGACGTGTTCGGTGGTAGCTGGTC
CGAGCTTCTCGCGGCCGCCGGCAGCGACGGTGACTCCAAGATCGGCCTGC
CGGACTTCGAGCTCGCCGATTTCGAGGACAACCTGTGGAGCCTGGAGGAC
CTTTGCTTACAGCAGCTGTGCTGA
>Pgl_GLEAN_10021026 PgMYB24
ATGGCGAAATCCCGAAAATTGTTTTTCTTTTTTCCCTTCTCTCTCCGGGG
GGCCGCGGGCGGACGCGCAGATCAGCGCGTGCCCGCCCAGGAAGAGCCCG
CCTACCCGTGCCCCTGCCCTGGGCGCCCCAAGGGAGCGTCCGCCCGCACC
TCTCAGGCGCTTCGCATCGCCTTTTTCCGCCGCTTTCTCGCCGGCGGGCG
GTGGGCGACGGACTGCTGCCCCGCCCACGCCGTCTCTGCGCGTTCTGAAG
GGCTGGGCGCCCTTGCCCTGCCAAAACCGGCGCCGCCTCCGCTGGGAACC
GGCGGCGGCGCGTACGACCGCTCCTACCCTGATGAGCCGCCGCTAGGCTA
CACGCCGTCGCGCTCAGACCGGTACTGGGCGGAAGACGACGGCGGGGGAT
ACAAGGGCTTCAGCCGGTATGGTGGTGGAGGCGGCGGCCGGAGGGACGGC
CGTGACGTGAGGGGTTCTTACCGAAGGTCTCCGTTCAGGGGCTATGGAAG
TGACTTTTCCAGAAACCATCCGGAGCAGCCCCCTCCGCCACCGCCGAGGA
GGTCCCCGTTGAGGTCAGTCGCTGTTCCGATCTGCTATGACCCTCCGGGC
AATAGAGTTGACAGGGGGGATAGGGACAACCTCCCACGGGTGGCACCATG
GCGGAGGAGGGAGAGCAGATCTGAGGCTGTGGATGCTGCTGGAGCTGGAA
CTCTGTCTCTTGGCCAGACCACTCGGACGGCATCCTCAGAGAAAGAGGCC
TCAGCTCAGCCTCCAGCTCCTCCCGGGGCTGAGGACGAGGCGCCAAGGAA
GAAGGCTCGACTTGGATGGGGGCAAGCACCCGAAGATAAATCATGTGAAC
TGACAGATACGTTCACAAACCCTACTAAAGATGTCCCTGAAGCTGCTGAT
GAAGCTGTCAACAATGAGTTCTCCATTAAGTTAGATCAGCTGGGTGATGA
TCCTATTAATTCCCTTGCAAACATGCTTGCTGACCTTCTTCAACATGATG
ATTCCTGCTCTGGGGATTCAAAAGGGCCAACCTGTACAAGTAAGCTGTTG
CTACTGAAGGAAAGCATTTCCAAGGAGATTGAAAAAACGGAATTAGAGAT
TGATTTGTTGGAAGGTGAACTTAAATCTGTGAATGCTGAGGCCGGAACAG
CTGTTGAAGGTTCTCCCACAGGTGTCACATATGCAGAAAATCTTTCACCT
TCTAGCGGGACATCAAAGGTCCCTGGAAGTGTGGAGATCTCTCGAACATC
TCATGTGATGAAAGAACCGGGGGAGCTCATCCCTTCTCCTAAGCTACCTG
TATTGCAGGATGCTGATGCCAAAGGTGCTGATATGATGGAAATTGAGACA
GTTCCAGTTCGTAATGCAAAAACAGTTTCTTCAGAAGAGAGTGCCGTATC
TCCTGGAGTTGCGGAGGGTCCGGTCTGTGCTGCTGCTGCTGATCTTAGCC
CATTGAAAGCTTCTGAAGGAGCTGGGTCTCGAAATGATATGGACAATGAT
AGGTTGGAAACTTCTTCATGCCATGTAGCTGATTCCATCAAAACAGAAGT
CAGTGATGACCTACGAGTGAGGCAATGCTCATACCATGATCATAATAGTC
TTTTAAGTTCTGTTACATCTGCTAATAATGATATTGCCAGAGTAATGAAT
GAATCACTATTTAAATCGTTGCCTGCTGATACACCCCACCTTGATTTATT
GGCATCAAGTCATCTTCTGAGCCAAAGGAAGGATGACCATCATATCAGAG
AGAGGCTTGGAGTATGTAAAAATAGTCTGAGATTGAAGGAGCAGATTCTT
ACCTTGAAATTCAAGGCATATCGTCACTTGTGGAAAGAGGATCTGCGACT
ACTTTCTGCAAAGAAACAACGCTCAAAGTCTAACAAGCGCATTGATCAGA
GCAACCGGACATCACTTGTTGGAGGATCTCAGAGGCAACGCTCCTCCAAT
CGCTCACGATTGGCCATGCCTGCTGGTAATTTAAGTACATTCTCAACTCC
AGAAATGTCAGATGTTGCATGCAAGTTATTTTCAGAATTTCAGATTAAGC
GCTGCAGAAACTACTTGAAAATGCCAGCTCTGATAATAGATGAGAGAGAG
AAGGAATGCTTGAGGTTTGTCAGCAAAAATGGCTTAGTTGATGATCCTGT
ATTAGTCGAGAAGGAGCGGGTTATGATAAATCCATGGACACAAGAAGAAA
AGGAAATATTTATGGAGATGCTTGCAAAATTTGGTAAGAATTTCTCGAAA
ATCTCCAGTTTCCTTGCACACAAAACTACTGCTGACTGTGTGGAGTTCTA
CTACAAGCATCATAAATCAGACAGTTTCCGAGAAGTCAAGAAACTTTTGG
ACTGTCGTCAACAACAACAACCTGCTAGCAATTTTCTGGGAGCAAAATCT
GGCCAGAAATGGAATCCCGAGGCAAATGCTGCTTCTCTTGATATGCTAGG
GGTAGCATCAGTAGTAGCTGCACATGGCCTTGAATATGCAAACAGAGTGG
AGAAAATCTCTGCAAAATCCCTTATCCGGACTACACATGGGCCCAATGTT
TCTTTTGCGGCCAAAAAATCTTCTGACAGGGAGTGCACTGACAATGTGCC
TTTGCATGAGAGAGAATCTGTAGCTGCTGATGTGTTAGCAGGGATATGTG
GCACTCTCTCTCCTGAGGGAATGGGCTCGTGCATTACTAGTTCTGCTGAT
CCTGGCCAAAAGATTAGAATGACAAGAATGGAGCATGTCTTAGCCCCTGA
AATCGACAGAAGCATTGATGATGAAGATACACTCTCAGATCAAGAGTGTG
AAGTTGATCCTGTTGATTGGAATGATGATGAGAAGTCAATTTTCATCGAG
GCTATGAATAACTATGGAAAGGATTTTGCTCGGATTTCGTCATGTGTGAA
GAGCAAGTCGTATGAGCAGTGCAAGGTATTCTTCAGCAAGGCTCGGAAAT
CACTTGGTTTGGATTTGATCCATCAAGGAGCACCTGATGTTAGTATGCCA
ACTAGTGATACAAATGGAGGGCGGAGTGATACCGATGAGGCCTGCACTGC
TGGAATGGATTCAGCAATCTGTAGCACACAGTCATGTTCAAAAATTGAGA
AGGATGTATGCCCTACGGAAAAGGCCATTGGTGGTATAATCACTATGCAG
TCAGAAATTAATATGAAAAATGGGTTTGATGTCATAGATGTTAAAACTGA
AGTAGATGAGAAGAAAGCTGATAAAAGTTGCAGTGTTGTTGATCATGGAA
GGTTTAATGAAGGTACTCATCAAGCAGCATGTGGTACTATTGACATCAAT
TGCCCAGAAAGCACAGAGAAACTGCAAGAAAAAGATGATGTTGTTGACCA
AGTAAATGCGCAAAACAATATTGTCACTAGCTCCTCCCCTGAGCAAGCAA
TGACAGTGCACCCAGAAGTCGGATCTAGTTTACAATCTGTCGAGGTACTT
CATCAAACAAACAAAGCCCCTTCGGGTTGTGGCACTGATGCTTCCCGGAT
GGAAGAGTGTTCAAACCATGCTCTTGATAATAAACTAAGGAAAGCTGGAA
ATTCCGGTGCCTCAGCTTGCATAGCTTCAGATATCTCTACTAAGGATAAT
GTTCACTTAGCAAACATGACTGACGCTTCCACCATTAGTCCTGCATTTGC
TCCTAGTTATCAGCATCCTGTGCCAGTAGATATGCCTCCAACAAAACCAA
AGCCACTGGTTACCCCCCTTACCCCAAAAGATTTAATGCCTGTGCAGTTC
AGTTCTGCAGTTCCTGATCCTACTGCGATTCGTTTCGATGGCATAGCTTC
AATAACTATGCCCAATTTTGATGACAGTGGCAACAGAGTCAGCAGTGCTT
TAGGGGCCAAAGACATGAGCAAGTACCCAGCTTTTAAAGACCCAACTGGT
AATCAGCATGACACATTGTTTTGTAATGTTGATGGTTACACGAATCATCT
GACAACTGAATTACCATTTTTTTCTGAAAGAACTGCTAGTGGCACTGTGA
GTACTTCTCAGACTGATCGGTTCACTCTAACAAAATTCCAGAATGGCAGG
TCCAGCAGCTTGGGCCTTTCAAACACTTCTGATGGGGTTCAATGGGCCAG
AAAACATGAAGAAGTACTGCATGGTTCTTTGAGGTCATGCACTCACAATA
CAAGCTCTGAGGGTGATGAACAACAAAAGCGGCCAGGTGATGTCAAGTTA
TTTGGGAAAATTCTCAGTCATCAATCATCCTTGCAAAGTCCTGCCCCACC
ATGTAATGGTAACAAGAGCAAGGCTCCCTCACCAAATATTGACATATCAT
CTGTGAGATTGTTGAACAGTCCACGGGATCGTGTGGTTTGTTCTTCCAGG
CCTGGCATCACTCATTTAGGTCTGGAGGAAAGAACAGCCAAGAGCTATGG
TCATTTGGATGGAAGCACAACACAGCCTGAGCAGCTGCTCATGATGGCAA
AGTGCCAGAGCTTAGCTGGTGTACCGTTTTACTCGGCTAAAAATGGCACG
GTTGGTGTGTTTTCAGATTATCAACAGGCATCTATTCAGTCGCATCAATC
AGATCCAAAACGGCTGGAAAGGTTTTCTGAGCCTCAGAAGCGCAACAGTA
TGGAATTCATCTCAGGTTTTCAGCAGCCTAGTAAAATCCCACGGTTTGGG
GGTGCTGGCATCCTTGTTAGTGGTGTCTCAGACCCTGTGGCTGCTCTCAA
GGCGCAGTATGGTCCCGGTTCTAAGGTTATGAGCAGTGACATGGATCCTT
GGAAGGACATAGGCAGCAGGTAG
>Pgl_GLEAN_10021620 PgMYB25
ATGTCCATGTCCATGTCCATGTGCAGCAGGAACAAGAAGGAGAAGGACGG
CGAGCAGAGCATCATCAGGGACGGCGGCGCCGCGGCGGCGGCGACGATGA
GGAAGGGGCCCTGGACGGAGGAGGAGGACGCGCAGCTGGTACGGTTCGTT
CGCCTGTTCGGCGAACGCCGATGGGATTTCTTAGCAAAGGTGTCAGGTCT
GAGGCGCACCGGCAAGAGCTGCCGCCTCCGGTGGGTCAACTACCTCCACC
CGGGGCTACGCCGCGGCCGCATCACCGCCGACGAGGAGCGCCTCATCGTG
CAGCTCCACGCGCTGTGGGGCACCAGGTGGTCGCGCATCGCAAGGAGCCT
CCCCGGCCGCACAGACAACGAGATCAAGAACTTCTGGAGGACGCGCACAA
GGAAGAAGGCGCTCGAGGAGAGGCGGCACGCCACCGGCGACGGCGAGGAG
GGGGCGGCGTCGTCGCCTCTGTCCTCCTCTGAGACGACGGCCTCCTGCTG
CACCGGCTCTCCGACCACGCCGTCCTCGTCGGCGGCGGCATCCGACGATT
CAGCGCTGCGGGAAGGCAGCTGCAGCGGCGGCGACGCCGAGNNCGGCCAC
CGGGGCGAGCCAGCACCAGCAGCCGCAGGAGTACAGCTGCACTATGGACC
AGCTGTGGAACGAGATCGCGGCAGCCGATGCGGCGGCGAGCTACGTGCTC
GACGGCTGGGGAGCCGCTGGCCATTGTTACTATGGCGCTGCCGCCGCTGA
>Pgl_GLEAN_10021618 PgMYB26
ATGGCGGCAGCAACCATGTCCATGTGTTGCAGGAACAAGCAGAAGAAGGA
CGGTGAGCGTAGTAGTGGTGGTGGCAGTCAGCAGTCGGGGATGAGGAAGG
GGCCGTGGACGGAGGAGGAAGACGCCCAGCTGGTATGGTTCGTCCGCTTG
TTTGGTGAACGCCGGTGGGATTTCTTAGCAAAGGTTTCAGGTCTGAGGCG
CACCGGCAAGAGCTGCCGTCTCCGGTGGGTCAACTACCTCCACCCGGGCC
TCCGCCGCGGCCGCATCACCGCCGACGAGGAGCGCCTCATCCTCGAGCTC
CACGAGCAGTACGGGAGCAGGTGGTCGCGCATCGCCAGGAGCCTCCCCGG
CCGCACCGACAACGAGATCAAGAACTACTGGAGGACGCGCACCAGGAAGC
AGAAGGCGGCGAAGACGGCGTCGGCGTCGGCGTCGGCGTCCTCGTCGTCG
ACCTTCTGGAACGAGATCGCGGCGGCCGAGGCGGCGGCGAGCTACATGAT
GGCCGACGGCTGGGGAGGCGCGGGTTACCCCGCCGCCGCCGCCGAGCCGC
CGGTGATACCGTCGTCGCCGGTGTGGGAGTACTGCTCGGATTACTCGCTC
TGGAGGATCGACGACGAGGAGTACTACAAGAAGATTCTTGACGCCTCTTG
A
>Pgl_GLEAN_10011728 PgMYB27
ATGTCGGCGCCGGACGCCGCGGCCGAGCGGCCGCCGGCGACGAGGAAGAC
GTCGTGGAGCAAGGACGAGGACGCCGTGCTGCGCGATCAGCACCTGGCCC
CCGGCGTCGACGCCGGCAGGCCCTTCACCGCCGAGGAGGACGCCGTCGTC
GTCGCGTGCCACCGCGTGTTCCCCAACAAGTGGTCCACCATCGCGAGGTT
CCTCCAGGGCCGCACCGACAACGACGTCAAGAACCGCTGCAACACCGCCC
TCCGGCACCTACTGAACCCGCAGCAGCCGGGAACGCTCCCGCTGTTCCCA
CTGGCGCAAGGAGATGTCAGGGCCAGTGCCAGGCACGGCAGCCCGGTGGT
GCTCCGCCGGCGCCAGCCGCCCGACGAGGCTGCTGGGGAGGATCATGGGA
GCGGCGCGTGCCTCGACCTGTTCCCGCTGGTTCCTGGCGATCTTGTCAAC
GTGGGCAGGAACAATGCGTTCGAGGCGGCGGCGATGGACGCGGATGTTGT
CGGTGCCGCCGGGGACTTGCTCGAGATGAGGCTCTGGCCGGCGTCCACGG
CCATGGCGGTGTTCAGGGCGATGGTGCAGGCTGTTCGGGCGCCGTAG
>Pgl_GLEAN_10011717 PgMYB28
ATGCCCGGCTTCGCGCGGAGGGGCGGAAGGGTTGGCGAGGATGACATACT
CCGCAAAGCTGTTGAAACTCACAAAGGGAAAAACTGGAAAAAGATAGGTA
GGACTGATGTTCAATGTTTGCATAGGTGGCAGAAGGTTTTGAACCCTGAG
CTTGTTAAAGGGCCATGGTCCAAAGAAGAAGATGAAATCATTATTCAGAT
GGTAAACAAACTTGGGCCAAAGAAATGGTCAACCATTGCCCAAGCTCTGC
CTGGACGTATTGGAAAGCAATGCCGGGAAAGGTGGCACAATCATCTTAAT
CCTGGGATCAACAAGGATGCGTGGACACAAGAAGAGGAAATCAAGCTTAT
CCATGCTCATCAAACTTATGGAAACAAATGGGCTGAACTGACGAAATTTT
TACCAGGGAGGACAGACAATGCAATAAAAAATCATTGGAACAGCTCGGTG
AAGAAGAAAGTCGATTCATACAGAGCATCTGGTTTACTGGCTCAATTCCA
GGGCCTAACACCTGTTGAATACACTGCCGGTTCTTTGAATGTTGATTCTT
CATCTGCAATGACCAACCAAATTAGTGAAGACAGTGGTTTTAATGTATGT
CGGGAGGTGGAAGATTCGGCAGAGTTAAGTCAATCATCATTTGTGAAGGG
TTCTTGCTCTCAGGAGGAGCAAACTGATGTGGCTTTGGGTTCTCATTTAA
ATGTGCACGAATCATTGTGCGAGGATGGTTTCACTAATTCTGACAATGTT
GCTTCTGCTTTACCTGATATGCACCACCAGTTATCCACTTCTGACATGGA
TCAAGGTAAACACTTGCAGGGAGAGTTTTCTCAAGGAATGGATTTGGATA
CACACTTGCAGCAAGAGTTTTCTCAAGGCATGGATTTGCATCTTGACATA
GATGAAGTGCCAAACAATTTTGTGATAACAGATAGCCAGGCATCCAGTGA
GCTTGCAGGTCAATTTCAGGACGCACAGATTATGCACAATTCAGAAAATG
ATAGAGGATCTCTGATACCTAGTGTTTCTGAATGTGAGCACAACATAAAT
ATGATGAGTGAAGTGGACATACAAAATGATAACTGTTTCCACACTGAACA
GTGGCAGGATATTTCCATTAGACCAGATGTGTATTCTTCTGAAGCTGCAA
GCAACTTTTCAGTGCCACTTTGCCCATTGAAGACTGAACCTGCAAGCAAC
TTTTCAGCACCACTTTGCCCATTGAAGGCATCTGAACCTGCAAGCAACTT
TTCAGCACCACTTTGCCCATTGAAGACATCTGAACCTGCAAGCGACTTTT
CAGCACCACTTTGCCCATTGAAGACATCTGAACCTGAAACCATGATGGGT
GACCATTTGTATTATCAGAGTTCTGAAACATCATTACCACCATCCTTCAT
TTTTTCAGATGTTGCTTATAATGAATCTGATGCCAAATTTGAGACAAGTC
ACTGTTGCCAAGATTTCGAGATTAAAACTCGCTACAATACTTCTGGTGAT
CCTGGTCAAAATTCATACATCAGCAGAGAAGATGACAGAAACCAGACTTC
TGAACCTATGGACAGCATACCAGAACCTGAAAAGGAACAACTGGTTGTTC
TTCAACAATCATGTTTGGAGCCTACAGCTTACAATGAAGAAGAAGCATTA
CCAAGTCAGGGTGACACTATGTTGAGCGAAAAGGAGGATGCTGGAGCTTT
ATGCTATGAACCTCCTTGCTTTTCAAGTTTTGAAGTTCCCTTTGTCAGCT
GTGAACTTGTAACCTCTAGCGATCTCCCAGAATATAGTCCTCTTGGCATT
CGAGAGTTGATGAGGTCATCCTTGAACTTCCCTACTCCAGTAAGATTGTG
GGGCTCCCCAACTCGTGATGGCAGTCCTGATGCTGTGCTAAAAAATGCTG
CCAAAAGTTTCGTACGCACCCCGTCCATAATGAAAAAACGTCCGAGGGAT
CTCTCATCTCCTAGTCCTGATATAAGAAATGAAAAGAAATCAAATACTGA
AAAGGATTGTGGCAGGTCAGGAATGTCCTCTACAAGAATAGGGAAATCTT
TCATGGATATCCCTGATGACTTTTTTGATTTAGTTTCACCGAGATCTGCA
TTTCAAAAGAAGCTCAAGCTTTCTCAAGAAAACAAAGAAAATTTGGATCA
AATTACTGATCAGGGAGAAAATGAAGGAAATTCAAAGCATTCTGCAGGGA
TTCTTACCGAGAGCAGTGTCGACAACCAAAATACTCCTAAGCATGGTCCA
AATTATGAAAGTCAGAGGCTAAATACCAGCACAAAGGCTTTGTCCAACTC
TAAAGACATAATTTTTTCTAGATCAAAACAATCTGAACTTCTTCTAGAGA
AATCTGCACCCTGCATTGATGCAGAGTATGAGTATGTGAACATATTGGCT
GATACTCCAGGTATTAAAAGAGGCTTAGAATCTCCTTCGGCATGGAAGTC
TCCTCTGTTCACACCATTCCAGGATGCGCACTTCATGAGCCCAGCAAGCA
GATCGTTAGATGCCTTAGGATTGGTGAAGCAGATTAATGAGCAGAGTGCT
GCTGCTCTAGAGGAAGCGCATGAGGTTCTGGCAAGTGGTAGCCCATGGAA
ACGACATAGCAAGGAAAACTCCGATAAAAAAAATGTAGAAAATGCATCTT
GGAAGAATGAACTTGTAACAAGCAAATCTCTATCCAAAGTCATGGCAGAA
GGACGGGTGCTCGATTTCAATGAATGCTCCACACCTGCAAGGAAGAAAGA
AGATAAGAAAATGGACATAGTAGGATCTGCAAGCTCCCCTGTTGCTTCCT
CTTATCTTCGGATGAATGTGCGGTAG
>Pgl_GLEAN_10038213 PgMYB29
ATGCTTCCCGACCATCCGTCCCTGTCCTACGACCCTGACAAGCCGTCCAC
GTATGTCTGCACCCCGCCTCCACTCATGGAGGGATGTGGAGTGCACAAGC
AGTTCTACGGCAAACTTCACATCATGCCCATGCACTCAGATTGGTTCACA
CCAACGACGGTGCACAGGTTGGAGAGGCAGGTTGTGCCACAGTACTTCTC
TGGAAAATCCCAGGGGCAAACACCGCAGAAGTACATGATGTTGAGGAATA
GGGTGATTGCCAAGTATTTGGAGCGGCCTGGGAAAAGACTCGTGTTTGCC
GAGTGCCAGGGACTTGTCACAAGCACACCTGAATTGTATGATCTGAGTAG
GATAGTTAGGTTCTTGGAATCTTGGGGGATTATTAATTACCTTGCAACAG
GGTCTGTGCACCGTGGCCTTAGGATGGCAGCATCACTAGTCAAGGAGGAG
ACAACAGGGGAGCTGCATCTGGTATCTGCACCTATGAAATCGATTGATGG
TTTGATTCTGTTTGATCGGCCAAAATGCAGTATCCGGGCAGATGATATAG
CTTCTGGTGTGTCAACTTCATCTGCTCCAGTTGTGGCAAATGGTGATGCT
GATTCTGCAAATTTGGACGATAAGATATGGGAGCGCTTATCAGAGGCTTC
TTGTAGCTTCTGCTCACAACCTTTGCCCAGCTTACATTATGAGTCACAAA
AGGAGGCAGACATTGCTCTTTGTTCGGATTGCTTCCACAATTCAAGATTT
GTTACTGGACATTCAAGTTTAGATTTTCAAAGAGTGGATGGGATGAAGGA
TCGATCAGACGCTGACGGGGACAAATGGACTGATCAGGAAACCTTATTGT
TGTTAGAGGGCATAGAGAAGTACAATGATAACTGGAATCATATTGCGGGG
CATGTTGGAACAAAGTCAAAAGCACAATGTATTCAACATTTTATTTGTCT
CCCAGTGGAAGATGGGTTGTTAGAGAACGTTGACGTGCCAGAAGCATCCC
TTCCATCCAGGATGCATAGCAATGGATTTTTGCATTCAGATTCCAATGGC
AGCACTTCAGGTTGTTTACCTCAAAGTAGCCAACCTGGAAACCAAATTCC
ATTTATTAATTCTGCTAATCCAGTCATGTCACTGGTTGCATTCTTGGCCT
CTGAAGTAGGACCAAGGGTTGCAGCAGCCTGTGCAAGTGCAGCATTGTCG
GTTTTGACAAGAGACGATTCCAGGATGTGTCCAGAAGGCATCAATGCTGT
GGGTCATGCTGCTCATCTAAATTATGGACCCTCATCATCCATCTCTCCTG
AAACTGTCAAACATGCTGCCATGTGTGGCTTGTCAGCAGCGGCAACAAAG
TCTAAACTTTTTGCAGATCAGGAGGAGCGAGAAATTCAGAGATTAGCTGC
TACTATCATAAATCATCAGCTAAAGAGACTGGAGTTGAAGCTGAAGCAGT
TTGCGGAGGTTGAGACCATGCTGTTGAAGGAGAGTGAACGGTTTGAGCTG
ATGAGGCAGCAGCTGGCAGCTCAGCGCATCCGGATATTATCAACCCGGTT
ACCTTCCTCAGGTGGCACTCTACCCGGGGGTGGCAGCACCGTGGCCATGG
TTTCAAACCCAATGAATCAGGCTGCCGGTCTTAGACCGCCGATGATGCAG
GGCTCGATGCCGCAGCCTAGCATGCCAGCGATGTACGCCAACCACATGCA
GGGGCACCCCCAGATGGCTGCTCTTCTGCAGCAGCGTCAACAGATGCTCT
CGTTCGGGCCTCGCCTGCCGCTCTCAGCTATCCACCCTGGCACGCCATCC
TCGTCGGCACCCAGTATGATGTTCAACCCTGGGATGCCCAACTCGTCGGC
TCCTAACCACCACTCGCTGTTGAGACCACCTTCTTCAGGGAACAATTCAA
ATGTAGGTTAA
>Pgl_GLEAN_10038222 PgMYB30
ATGGGGAGGTCGCCGTGCTGCGAGAAGGCGCACACGAACAAGGGCGCCTG
GACCAAGGAGGAGGACCAGCGCCTCGTCGCCTACATCAAGGCCCACGGCG
AAGGCTGCTGGAGGTCGCTCCCCAAGGCGGCGGGGCTGCTGCGCTGCGGC
AAGAGCTGCCGGCTGCGGTGGATCAACTACCTGCGCCCCGACCTCAAGCG
CGGCAACTTCACCGAGGAAGAAGACGACCTCATCGTCAACCTCCACCAGA
TCCTCGGAAACAAGTGGTCTCTGATCGCCGGGCGTCTGCCGGGCCGGACG
GACAACGAGATCAAGAACTACTGGAACACGCACATCAAGCGCAAACTCCT
CGCCCGAGGCATCGACCCGCAAACACACCAACTGCTCAGTGGCCGCGCCG
CCGCCAACGCTCAAAGCAACCGTCCCCATCAGAACCACCAGCTGGCGGCG
GCGGCGCGCTCCAGCAGCTCGCCGCAGACGAGCGGTGCGGGCCACAGCAG
CGATGAAGACAGCGCGTCCGTGCCGTACCACGGCGGCATCGATCTCAACC
TGTCCTTAAGCCCCCCAAGCCAACCGTCCTCGCCGGTCGCCGCCGTTGCC
AACTAG
>Pgl_GLEAN_10038224 PgMYB31
ATGGGGAGGTCGCCGTGCTGCGAGAAGGCGCACACGAACAAGGGCGCCTG
GACCAAGGAGGAGGACCAGCGCCTCGTCGCCTACATCAAGGCCCACGGCG
AAGGCTGCTGGAGGTCGCTCCCCAAGGCGGCGGGGCTGCTGCGCTGCGGC
AAGAGCTGCCGGCTGCGGTGGATCAACTACCTGCGCCCCGACCTCAAGCG
CGGCAACTTCACCGAGGAAGAAGACGACCTCATCGTCAACCTCCACCAGA
TCCTCGGAAACAAGTGGTCTCTGATCGCCGGGCGTCTACCGGGCCGGACG
GACAACGAGATCAAGAACTACTGGAACACGCACATCAAGCGCAAGCTCCT
CGCCCGCGGCATCGACCCCAAGACGCACCGTCCGCTCAGTGTCGTCCCCG
CCGCCGCTGCCGCACCAAGCAGCAGCCGTCCCGATGACCATCACCAACGG
GAGACGGCGCGGTCCAGCTGCTCACCGGAGACGAGCGGCGCCTGCTGCCA
CAGCAGCGACGATGACAGCGCCTCCGCGTCGCACCACGGCAGCATCGACC
TCAACCTATCCATAAGCCCGCCGAGACCGAGAGACCCTTCGCCATCGCCG
ATGACGACGACGCAAGAAGCAGAAGCGACGAGCAGAGCGACGACCGTAGA
GGAAACTACACCCACAAGGAAGAGCTAG
>Pgl_GLEAN_10009918 PgMYB32
ATGGGGAGGCCGCCGTGCTGCGACAAGATTGGGATCAAGAAGGGGCCATG
GACGCCGGAGGAGGACATCGTCCTGGTCTCCTACATCCAGGAGCACGGCC
CCGGCAACTGGCGCTCCGTGCCCACCAACACCGGCCTCATGCGCTGCAGC
AAGAGCTGCCGCCTCCGCTGGACCAACTACCTCCGCCCCGGCATCCGCCG
AGGCAACTTCACACCCCACGAGGAAGGCGTCATCGTCCACCTCCAGTCCT
TGCTAGGCAACAGATGGGCGGCCATAGCTTCTTACCTCCCGCAGCGGACC
GACAATGACATCAAGAACTACTGGAACACTCACCTCAAGAAGAAGCTCCA
GAAGCACCAAGCCATCGGCGCAATCTTCGCGCCACCGCCTCCCCCGTCCT
CTGAATCTTCTTCTTCCATCATACCTGCCACCGCCGGCGGCGGCGGCGCC
AGCCATCATGTCGACCTCCACCATCATGACACAATAATCGGCGGCGGCAA
CTACGCGGGCTCAGCAGCATGCAGCAACCCAGCAGCCGAGGCCGCCCAGC
TCATCATCGCCCGACGCCCGCCGTTGTTCGCTGCCACCGACGGCGACAGC
TCCTCCTCGTCCTACTACGCCTCCAGCATGGACAACATATCCAAGCTGCT
CGACGGCTTCATGAAGAGCTCCCCACCACCGCAGAACGACGACGCCGCCG
ACATCAAGCCCTCGACCGCCGATGTTGTTGTCGACCTCAACCCTTTGCTT
TCGTTCAACCACATGTCCGCCGGTGGCGGCACTACTAGGCTGCCAGCATT
CAACGACATGCTGGCGTCGCCACCGCCGGCGCCGCAGCAGCCGCCGTTGA
CGATGGGACACCACGGTTACGGCGACGAGCCCAAGCAGCAACACCACCAG
CAGGGGCCGCTGTCTCCGATCGAGAAGTGGCTCTTCGAAGAGGCCGCCGA
GCAGGTCGTCGACGTCGACCTCATGGATCTGTCCGACGCCTGCTGCTCAT
CAGTTCCAATGATGTTCTAG
>Pgl_GLEAN_10013171 PgMYB33
ATGGATTTCAGTTGCTTTCAGCCCCACACAGGGATTTGTAATTACTTGCC
GTTTGATTCCTACATGCAGCAGAATGGACACTACGAGCTCCATCCTGTTG
ATCATCCATTTGAAGCTATCAGTGGGGACTATGCATCTGTTGGTTCTATG
GTACCCACTGCAACCTTCAACGACATTGGACACCGCCAGTACTTTGCAGA
AAGAGATATCAAGAAGCCCATCTTTGGTTATGCTTCATCGACTGATCATA
GAGTTGGATCTCAACTGCCTATGCTGACTCCCAAAACTGAGGTTTCCCAT
CTCATAGAAAGTGGCCTCGGATCATATAAGACTTATGAGATGAGTGACAG
GTTTGTGCCAAGGAAGAAGACATCAAGTTATTCGTTGAAGAAAGTCAATG
TTGTGAAAGGGCAATGGACACCAGAGGAGGATAGGAAGCTAGTAAAATTA
GTGGAACAGTTTGGACTGAGGAAGTGGTCTTACATAGCACAAATGCTACC
AGGAAGAGTTGGAAAGCAATGCAGAGAAAGATGGCACAACCATTTGAGGC
CCAATATCAAGAAAGACATCTGGAGTGATGAGGAAGACATGGTCCTGATA
CAAGTGCACAAGGAAGTGGGCAACAAATGGGCAGAGATAGCCAAGCGCCT
ACCTGGTAGAACAGAGAACTCCATAAAGAATCACTGGAATGCAACAAAGA
GGAGGCAGTTTGCGCGAAGGCGTAGCCGTAGCAGCTCCAAGGGCCCCAGG
TCAAGCACCCTTCTCCAAAACTACATCAAAGGCCTCGGAATCAGCCCAAG
CAAGAACCCTGCCGCACCACTTCCTCAGCCTACATTGTTGCCACTGCCTT
CACCTGCAAGTCCCGGAGCAAAGTCGTCGTCGGCAACGATCGACAAGATG
CTAGAACGCAGCCCATCCGACATACTGGACCCTCAAGTGATGCTCAGTGT
GTATGAGTACAATTGCAGCGAGACCCAGTCTTGTGAAGAACTCGTAGCGC
CTATCTGCGGCTATGATGACTTCTCAGTAGTCGGCATGTGCGACAGCCTG
TTCGACGCAAAGGAGGACGCGTTCCAGCAAGCAACCTATGCGGTGGACGA
CGACATCGACATGAACTACATCTTCAACCACCTCGACCACACGATCAAGG
CTGATCCTGAGATCTCAGACATGGAGATGATGATGTGGGACGACGACGCC
CTCGGGTGCGTCTTTGAGCCTGCTGGATCCGAAGCTGTGCGTGTGAAGGA
GGAGATGGATCTGGTGGAGATGGTGGCAGCCACACAGCAGAAGTATGGTG
AGGCGGAGAAGAGCCAGCTGCTAAGTGATTGA
>Pgl_GLEAN_10022854 PgMYB34
ATGGGTAGAGCTCCGTGCTGTGACAAAGCTAGCGTGAAGAAGGGCCCATG
GTCGCCGGAGGAGGACGCCAAGCTCAAGTCCTACATCGAGCAGAATGGCA
CCGGCGGCAACTGGATAGCCCTGCCGCAGAAGATAGGGCTGAAGAGGTGC
GGCAAGAGCTGCCGCCTCCGGTGGCTGAATTACCTCCGGCCAAACATCAA
GCATGGAGGATTCTCGGAGGAGGAGGACAGGATAATCCTTAGCCTCTACA
TCAGCATAGGCAGCAGGTGGTCGATAATAGCGGCGCAGCTGCCGGGAAGG
ACGGATAATGACATAAAGAACTACTGGAACACGAGGCTCAAGAAGAAGCT
CTTCGGCAAGCAGTCCCGCAAGGATCAGAGGCAGCAGCAGCAATTCATGC
GCCATCCGACGGCAAGCGAAGGGATGAAGCAAGAAGCAACGACCGGGGAT
GCCAACGGAAGCAGTGGCGTGCCGGCAGTCACTTACAACTGGCACCAACA
AGCCATTACCGGGGCAGTGCCACCAGTGCCAGGTATTATGATGGAAGGCC
ATCGCATAGGAGACGAGGTAGATGAGTCAATCCGGAAGCTTCTTTACAAA
CTAGGAGGCGCAGGCCCTTTTGCAACCCTGCCAGTTCCTCAGTGTGTCCC
TCCAATGTATGAGGGAAGTCCAAGCCTCATGCCTCCATCATGCACCGTAG
ACACCACTTCCCTTAGCGAAGGCGGCGTGCAAGGTTCCAGCACACTGCCG
GCGCTGGAACTGGACCAGAGCTTCCACTTTAATCAGGTTAAGCTGGATGG
TCTGGATTGCTTCTTTGGTATGAGTATGGATCAGAGCATGAGGTGGAATG
AGGTGAGCCCATTGGTTTGCCCTAATAATACTGTGGCTTCCAGCTCCCAA
GGGATGCAGCAGTATTGTCTTGTTGACGAACCGGCGAACCTTGGGATGAA
GTAG
>Pgl_GLEAN_10013746 PgMYB35
ATGCTGCAAAGGAACCTGCCGAATCTCTCCCTCGGGATAAGCCCGCCAGC
CGCCTCGTCGGCGGCTGCTTATGGTGACGCGAAGGCGGTGGCGAAGCCTC
CGTCGGCAGAGCCAAGCACGGCGCCGCACGCTGAAGGAAGCGGCGAGGTA
GGGTTCTTCGCAAACCCTAGCCCCGTGGCGGAGCCCCCGGGCCTCAGCCT
GGGGCTCGGCACGCCANNNNNNNNNNNNNNNNNNNNNNNNNNNNNNNNNN
NNNNNNNNNNNNNNNNNNNNNNNNNNNNNNNNNNNNNNNNNNNNNNNNNN
NNNNNNNNNNNNNNNNNNNNNNNNNNNTCGACGACGAAGCGGAGCGCCCG
GGCGCCGCGGATGCGCTGGACCACCGCGCTCCACGCGCGCTTCGTGCACG
CCGTTGAACTCCTCGGCGGCCATGAGAGAGCGACTCCGAAGTCGGTGCTG
GAGCTGATGAACGTCAAGGATCTGACGCTGGCGCATGTCAAGAGCCACCT
TCAGATGTACAGGACGGTGAAGAGCACGGACAGATCATCGTTACACATTG
GCACGGGGGAAGCGTTGCCGCTGCAGAGGACGACGACGGCGACAGGGATG
GAAGCGGCGGAGGCGGGCACGGCAGCAGGAGGAGGTGGGGTGGTAGTGGC
AGCTCAAGGGGAGGTAATAAATCGTCACCTGGCCATGGGGCTGCACGCAA
GTGCTGAAGCAGTGGCTACAAACTGCTCGAGCCCGGCGAGCTCTTCTTCT
CCGTCCCTTGCAAGTGTGGAGCTGCTGGCAGACGACCTGTACGCGCCCAA
CCTGGAGATCACCCTCGGGAGGCAGGACTGGAGCATGGTGGAGCGCCCGG
AAGAACTTAGCCTAAAATACCTGTGA
>Pgl_GLEAN_10023444 PgMYB36
ATGGGGCGGTCCCGCGGGGTGCCGAATTCCGGCGACGACGACACCGGCCA
CAGGTCGAAGCGGAGGAGGGTGTCGTCGAGCGGGGATGCGACGGACACCA
TTTCCGCTGCCATGGGAGGGGCAGGCGAGGGAGGGGGCAAGAAGGCGCTG
TACCACTGCAACTACTGTAATAAGGACATTTCCGGGAAGATACGGATCAA
ATGCTCCAAGTGCCCTGACTTCGACCTGTGTGTTGAGTGCTTCTCCGTCG
GTGCTGAAGTCACCCCACACAGGAGCAACCATCCGTACAGGGTCATGGAC
AACCTGTCTTTCCCACTTATTTGCCCGGATTGGAATGCAGATGAAGAAAT
CCTCCTTCTTGAGGGAATTGAAATGTATGGTCTGGGAAACTGGCTTGAAG
TTGCAGAGCATGTAGGTACCAAGTCGAAGCAACAGTGCATTGATCATTAC
ACAACAGCATACATGAACTCACCTTGTTATCCCCTCCCGGATATGTCGCA
TGTTAATGGCAAGAACAGGAAGGAACTTCTTGCTATGGCTAAAGTGCAGG
GTGACAGTAAAAAAGGGACTACGCTGTTATCTGGCGAATTGACTCCTAAG
GCTGAATCTCCATTTTCTCCCTCCAGGGTCAAGATGGAAGAAGCACTTGG
CGATGGTACTGCAGGTCGATCTCCTTCGCACATGGCTGGTGGTGCAAATA
AAAAGGCTTCAAATGCTGGACAGAATAAAGATGGTGCTAACATATCAAAA
GTTGAAGATGGTCATGTCGATAGAAGTATTGGTGTGAAGAAGCCCAGATA
TTCTGCAGATGAAGGCCCTTCTTTGACTGAGCTGAGTGGATACAATGCAA
AGCGACATGAGTTTGACCCAGAGTATGATAATGATGCCGAACAAGCGCTT
GCTGAGATGGAATTTAAAGAAACTGACTCGGAAACTGATCGTGAACTGAA
ACTCCGTGTGCTGCGTATTTACTTGTCCAGGCTTGATGAAAGGAAAAGGA
GAAAAGAGTTCATATTGGAAAGAAATCTGTTATTCCCTAATCCCTTGGAG
AAAGATCTTACAAATGAAGACAAGGAAGTTTACCATCGCTACAAGGTCTT
CATGCGGTTTCTTTCCAAGGAGGAACACGAAGCCCTTATTAGGAGTGTTA
TCGAAGAGCGAAAAATTCGGAGGAGAATCCAAGAGCTTCAGGAATGTCGT
TCCGCTGGATGCCGTACACTAGCTGAAGCAAAAATACACATAGAGCAAAA
GAGGAAAAGGGAATACGAGCTAAATGCCCAAAAAACTAAGGAAAGTGGCC
AACTTATTCCAAATAACAAATCAGTACAAAAGATGAATCGACCTGTGAAA
ATTGAGTCGGATGGGAATTTGGATCCAAAGAAAGGTGGTGCTGGCTTAGA
TTCTCCTAAAACCACAGGACTTACAAGTGTGAAGCAGTGGGATGATTGGG
ATATAGTTGGTCTTCCTGGGGCAGAACTATTAAGCGCTAGCGAAAAGCTT
CTATGTTGTCAGAATCGATTACTGCCCAGTCATTATCTGAGAATGCAGGA
GGTGCTGATGCAAGAGATATTTAAGGGTAGTGTACACAAGAAAGAAGATG
CCCATGTCTTATTTAAGGTTGATCCCACCAAAGTAGATACTGTTTATGAT
ATGGTAACAAAAAAGCTGGGCAACCATGAGGAGGCTCCGACTGTCTAG
>Pgl_GLEAN_10002927 PgMYB37
ATGTGCACGAGGGGCCACTGGAGACCATCGGAGGACGAGAAGCTCAAGGA
GCTCGTCGCGCTATACGGGCCGCACAACTGGAACGCCATCGCCGAGAAGC
TTCAAGGGAGATCAGGGAAAAGCTGCAGACTGAGGTGGTTCAATCAGCTG
GACCCCAGGATAAACCGGAGCCCCTTCTCGGAGGAGGAAGAGGAGCTGCT
CCTCGCCTCCCACCGCGTCCATGGCAACCGGTGGGCCGTCATCGCCAGGC
TCTTCCCGGGGCGCACCGACAACGCCGTCAAGAACCACTGGCATGTGATC
ATGGCGCGGCGGTGCAGGGAGCGGATGCGGATGTCTAACAAGCGCGGTGC
AGGTGGTGCCCCTAGTGCTGCCGCCGCCGGTGCTGCGGAAGATGAAAATA
ACCCTAGGAACGCCAAGAGGACGAGGCCTGATTCAAGCAGCATGGCCTCC
CTACTGCACAAGTACCGAAGAGAATTTGCAGTACCCTTTGCCATTAATCA
TGATAGCAACAAGGAGGATGATTATTGTTCAACTACTAACGAAGAAGAAG
ACACCAACAAATCAGTTGAATTCTACGACTTTCTCCAAGTGAATGCGAAC
TCGAGCGACACCAAGTGCGGTTCGAGCATTGAGGAGCAAGAGGAGAACCG
GGATGATCAAGCAGAAGGGCAGGTGCAGTTCATAGACTTCCTGGAGGTTG
GGGCTTCTCATCGCCAATGA
>Pgl_GLEAN_10001156 PgMYB38
ATGGAGCCCAAGCCGTCTTCTGCGGCGCACGGTGACGCGCCCGCGGNNNN
NNNNNNNNNNNNNNNNNAGGAGAGGAACGCTTCCTTCCACGTGCCCCCGC
ACCTGCTGCACAGCGGGCCTCTCACCCGCGCCTCTCGCCACTCGCCGCAC
AAGCTCGCGGGCACGCCGTCGGAGGTGGGGCAAGCGTCGTCGGCCGCAGC
AGCTGGGGATGGGGTGAGCGGCGGGCAGGGAGAGGTTGATGCGATCCGGC
CCGAAGGAGAGGAGACGCCAGCAGCGGAGCAGCCGCTGGTGGATGAGGTG
TTCGAGGCCGTCCGATCCCGCGGCGCCGGCGTCCATGTGGTCCCTACCTT
TGCTGGATGGTTTTCATGGAAAGAGATCCACCTGGTTGAGAAGCAGACCT
TGCCTTCGTTTTTTAATGGCAAATCTGAGAAGCGGACACCTGAGGTATAT
TTGGCGATTAGAAATTCCATTATGGTGAAGTTTCATGCCAATCCTCAGTT
GCAGCTGGAGTCCAAAGATTTGGCTGAATTGTCAATTGGGGAGGCTGATG
CTCGGCAGGAAGTCTTGGAGTTCTTGGATCACTGGGGCTTGATAAATTTC
CATCCATTTCCACCAGCTGAACAAGAGGGGAGTAAGCCTGAGGAGAGCCA
AGACAATTCTCATGACGAGGATAAAGCTTCTTTGATCGAACAGTTGTTTA
AATTTGAACCAGTTCAATCATATATAATGCCTTTACCCAAGAAAGAAGAT
GTGGGAGTTCCGCCCCCACTGCCCAGCTTGTTTCCTGATCCTGTACTTCT
TGAAGATGTAGTTGCAGCAGCTGAGCCTTCTGTTGAGTACCACTGCAACT
CCTGTTCAGTTGATTGCTCACGGAAACGATACCATTGTCGGACTCAGGCA
GATTTTGACCTGTGCTGTGATTGCTATAACGAAGGAAAGTTCGATCCAGG
CATGGCCAAAACTGATTTCATCCTCATGGATTCTTCAGAAGTTTCAGGTG
CTAGTGGCACTAGCTGGACTGATGAAGAGACATTGCTTCTTTTAGAAGGT
TTAGAAATTTTTGGTGGAAAATGGGCTGAGATTGCTGAACATGTTGCTAC
TAAAACAAAAGCGCAATGCATGTTGCACTTTCTTCAAATGCAAATCGAGG
ACCGCTTCCATGATGGTGAAGATGTTAATCAGAACACCCCAGGAAGCACG
GAACAAGCCACAACTGAGAAAGGCATTACTGAAACATCTGATAAAATGGA
AGTTGAAGATAAAGAGGAAGGAAGAGATACCGTGGATGAGAAGGTCTCGG
AGAAAACAGAGGGAAACTGTGAAGAAACAAAAACTGAAGGTGCAAGTGCT
GTTGAAAATAAAGATACTCAGAATTCAGGTGGCAAGGATTCAAATGCATC
TCCAAACACTGAAGAACCTAAACAATCATCTGATGATCACCCTACAGTAA
AAGAGAATTCTGCAGATGTCGATACTTCTGGTGAAAAACTATCGGATGTT
GCTCTTGATATCCTAAAATCTGCATTTGAGGCTGCTGGCCACAGCCCAGA
GTATGAAGGTTCATTTGCTGATGCAGGAAACCCAGTTATGGCACTAGCAG
CATTTTTAGCTGGTCTTGTGGAGGATGAAAACGCTACTACTTCATGCCGT
AGTTCACTAAAAGCTATCTCTGAGGTTTCTCCCGCGCTTCAATTAGCAAG
TAGGCATTGTTTTATTCTTGAGGATCCACCAAATGATCTGAAGGATATTT
CTGTTAGTGTAAGTAATATAAGTAACAAAAGTACAGATGGTAATCAAACA
AAAGAAGAGGAGATGACCGAAAATTCCGTTGACACTGAGAAAAAAGAGAA
CAATGAGAAAGAAGATAATTCTTTATCTGTGGAAAAGCATAATAATTCAT
CCATCTCACATAATGACCACCAAGAATCAGATGATAAGAGCATCTCACGT
GATGATTGCCCCATCGTGGAGCCCAAAACCTGTAATGCTAAAGAGTCAGG
TGATCCAACTGCTATTGTGGATAAGAGTGCAATCGACAATACAAAAGGAA
GTAATATATGTGCAAGTGATCCTAAACAAGTAAAGGACAAACCAAGTGTT
GAGGTGGAGGCTCGTGATGATTCATCTTCAAAAGGCAAGGACGAGCTCAA
TAAGACTGAAGATGTAGTTGCTTCACCAGCTACCGTAAAGGAACAAAAGC
AAAGTGAAACATTGGAAAATGGCAAAATGGGAGAACCTAACAGCATCGAA
CGCATAGTTGCCATTGCCAATGAAGAGAAGGGCGCTGCAGTTACTGCTAA
CCAGAATGATTCCACAACAAGGCTCAGACGAGCAGCAGCCACTGCTATTT
CAGCAGCTGCTGTGAAAGCTAAATTTCTTGGTGATCAGGAGGAATATCAT
ATTCGAAGGTTGACAGCAATGATGATCGAAAAGCTGTTCCAAAAGATAGA
AGTGAAGATGTCGTTATTTGCTGAGATTGAGCAGGTGGTCCTTCGAACAA
GAGAGTACACCGAGAAGACTAGAAAGAAGCTCCTATTGGAGCGAAATGCG
ATAATTGCAGCTCGCATGGGGGCATTGCCATCTAGGACAAATCAGCCTGG
TGTAGCTGGAAGCAGATTACCGCCTGGATATGGCAACCCCGCTGGTTTGA
TCTGGTGGGCGGCCGCCATGGTGGAAGGGATGGTAGTCGCCGTGCCGACT
GGGGTGAAGGCGGAAGCAGCCGCCGACGCCTCCGCCCCAAAGGCAGGTTC
TCCTAAATCCGTTCTGGAGGACGAGAAAATTTCTGAACCCAAGAACGGGA
ATGCCTCCCTTGCCACTGAACCAACTAGGCAAGCGGAGGAGAGCTCTGAT
GATTTTGTGGATGCAAGCTCGTCCCTGCCTACTGACCTTGAAATTGACAG
TGCTAGTGCGCCTGTTGCTAAGGCGGTCAAGGAGGAAGAGCAGCTTCAGG
AGCCTGTCAAGGAGGAGGAGGTTGACGATTCCGTGGTTGAAAGTTTATCT
GTACCGATTGACCTTGAGGCCAAGAATGGTGATGCATCCCTAATCACTGA
AGCAATGAAAAAGGAAGAAGAGCAGCTTGAGGAGGCACGGATTAAGGCAG
AGGAAGAAGAGGAAGCCAGGAAGAGGGAAGAAGCTGCAAAACTTGCTTTC
GATCCTGAGGCACGTTATAGCAAGTTAGATCAGTTGCTGACGAAGACACA
ACTGTTTTCAGAGTTTTTACTTGAGAAAATGGACCGAATCGCTGATGAAG
TTGTTGAACCTCAAGCTGAAGAGTTACCGGCAGCGGAAAAGAAGAAAGGA
CGTGGTCGGAAGAGGAAAGCTAATGCTGCGCCACAATATAATGACAAAAA
AGCTAAGACGGCAGTGGCAGCCATGCTTACAAGATCTCGTGAAGAACACC
TTGCGGATGATTGTAATCTCTCAGAAGAAGAAAGGTTGGAAAAAGAGCAA
GCCAATCTTGTGCCTTTAATGACTGGTGGGAAGTTGAAGTCATACCAGAT
AAAGGGTGTGAAGTGGCTAATTTCATTGTGGCAGAATGGGCTCAACGGGA
TACTGGCTGACCAAATGGGCCTTGGGAAAACAATCCAGACGATTGGATTT
CTTGCTCATCTGAAAGGGAAAGGAATGCATGGTCCGTACATGATAATCGC
TCCTTTGTCCACTCTCTCAAACTGGGTGAATGAGATCTCTAGGTTTGTTC
CATCTGTTACTAGTATTATTTATCATGGAGATAAAGCGGCCCGGGCTGAG
ATAAGAAGAAAATTCATGCCTAAAATTAAAACTGCTGTTAGCCCTGATTT
TCCGATAGTAGTGACTTCATATGAGATGGCCATGTCAGATGCAAGATTTC
TTGCTCACTATAAGTGGAAGTATGTTGCTGTGGATGAGGGGCATCGGTTG
AAAAATTCAAAGTGTAAATTGCTAAGGGAGATAAAGCGCATACCAATGGA
TAATAAGCTCCTTTTGACTGGGACACCCCTTCAGAACAATCTTGCAGAGC
TGTGGTCACTATTGAATTTCATTTTGCCTGATATATTTGCGTCACACCAG
GAATTTGAATCATGGTTTGATTTTTCTGCAAAAGGAGGTGAAGAAAAAGA
AGAAACTGAGGAGAAAAGAAGGGTCCATGTTGTTTCAAAACTTCATGCAA
TTCTGCGTCCGTTCCTTCTAAGGCGGATGAAAGAGGATGTCGAGCAGATG
CTTCCACGAAAGAAAGAGATAATCATTTATGCTAATATGACTGAGCTTCA
GAAGCGAATCCAGGATCACTTAGTTGAGAAAACATTTGATGTCTACTTGA
ATAAAGAATCGGATATTGGCCTGTATCCACCTGTTGATAAGCTTCTAGAG
CAATGTGGCAAATTTCAGCTTTTGGACAGGTTACTAACTTCCCTACTTGC
ACGGAAGCACAAGGTTCTAATATTTTCACAATGGACAAAAGTTTTGGACA
TTATGGAGTATTACTTAGATTCAAAAGGTCTTGAGGTTTGCAGAATTGAT
GGTGGTGTTACGTTGGAAGAGAGGCGGCGACAGATAGCAGAATTTAATGA
TGTGAACAGCAATCTAAATGTCTTCATTCTGAGCACACGGGCTGGTGGGC
TTGGTATCAACCTTACTTCTGCTGATACATGCATCCTGTATGACAGTGAC
TGGAATCCACAAATGGATCTGCAGGCCATGGACAGATGCCACCGGATTGG
TCAAACACGCCCGGTGCATGTATATAGGTTGGCAACATCAAATTCTGTCG
AGGGACGGATCATCAAGAAAGCATTTGGGAAACTGAAACTGGAGCACGTT
GTAATTGGGAAGGGACAGTTTGAACAAGAGAGAGCAAAGCCTAACGTTCT
AGAGGATGGGGAGCTGCTGGCGTTGCTTAGGGATGAGCAGGCTGAGGAAG
ACAGGATGATCCAGACTGACATCAGCGACGAAGATCTCTTGAAGCTGATG
GACCGGAGTGATCTGTCCGGACCGCCTGGTGCTGCTGACGCCGCACCACT
TATCCCTCTGAAAGGCCCTGGCTGGGAGGTCGTTGTGCCCACAAAGAGTG
GCGGCGGTATGCTCTCGTCGCTCAGCAGCTGA
>Pgl_GLEAN_10005188 PgMYB39
ATGATGTCAACAACGGCGTCGGCGGCGAGCTCGTCGACTGGGAAGGCGGG
GAAGAAGACCCGGAAGCCGTACACGATCACCAGGCCGCGGGAGAGGTGGG
CGGCCGACGAGCACGATCGGTTCCTCCACGCCCTGGTCCTGTTCGGCCGC
GACTGGAAGAGGATCGAGGTCTTCGTCGCCACCAAGACGTCCACGCAGAT
ACGCAGCCACGCCCAGAAGCACTTCCTCAAGGCCCAGAAGCTCGGCATCG
CGGCGCCTCCGGCGCACCCTCGCCGCGCCGCGGTCCTTGCCCAGGCCCAG
CCACCCGTCAGCTGCCCGCCGGCGTGGTTTCCTGGCGACGCCATGGCGCC
AAGCGACGAGACGCTGATTCAGCTCCCGCTGTCTCCGGATGATCCGCACT
TCGCTCAGGTGTACAGGTTCGTCGGCGACATCTTCGGCTCCGACGCGCCG
CAGCCGGTCGAGACGCAGCTGCAGAGGCTGCTCGGCGCGGACCCTGTCAT
TGTGGACACCATCTTGCGGGTCCTAAGAAACCTCGAAGAAAACCTGTTTC
TTTAG
>Pgl_GLEAN_10013105 PgMYB40
ATGGGGGCTCCAAAACAGAGGTGGACATCTGAAGAAGAGGCTGCTCTTAG
AGCTGGAATAGCAAGGCACGGAGTTGGAAAATGGCGCACAATATTGAAAG
ACCCAGACTTTAGTTCCACCTTATGCTACCGCTCAAATGTTGACCTCAAG
GACAAATGGCGCAACATGAATGTAATTATCAGTACATCAAGTTCTCGTGA
CAAGGGAAAGGCTGCAGTGAAGAAAACACGACCTACTCCCAAGAATAATG
ATCAGACCGTGGTAATCAGCACAGCAGTTACTTCTGATATTGATGATGAG
ATTGTTGATGAAAAGCCTATAGCAGCAGTGCCTAGTGAAGCACAGAATAC
ATCAAATGCAAATAAATCTCTTTTGAGACTAGATAATATTATAATGGAGG
CTATAAAGAGCTTAAATGAGCCTACGGGGTCTCACAGAACTACTATTGCT
AATTACATAGAGGAGCAATATTGGCCACCTAATGATTTTGATCACTTACT
ATCTGCAATACTGAAGGACTTGGCCACCAGTGGAAAATTGATAAAGGTGA
ATCGGAAGTACAGGATAGCACCTAGCTCGCCCAATTCAGAGGGCCGAACC
CCCAAAATGCTTTTGTTGGAGGACGTGCAAAGACAGCCTATCAAAATAGG
GAGCATCGGTAGTAAAACCCTTACGAGATCTCAAGTTGATACCGAATTGG
CACATATGGCGACAATGACTGCTGAGGAAGCTTCAGCAGCTGCTGCTCGT
GCAGTTGCTGAAGCAGAGGCTATCATGGCAGAAGCTGAAGCAGCAGCAAG
AGAAGCAGAGGCTGCAGAAGCTGAAGCCCAAACTGCACAAGCCTTTGCTG
AAGCAGCGCTTTTGACACTGAAGAATAGAAACACTGCAAAATTGGTAATA
GTTCTAGTCCATGGATCCCTTATATGTCCTATTATCCTTACACATGTTGA
ACTGGGCTTCGTAATACCTTCTGCAGCTGATTGGTTGCTCAAAGAAAATC
CTGAACTATCAATTTCTGTATATCCATTCTGCACATTAAGGTTGTGA
>Pgl_GLEAN_10009335 PgMYB41
ATGAGGCCGCCGACGCTCAGGGGCCCCTGGACCGAGGAGGAAGATGAGAC
GCTCAGGGAGATGGTGAACGTGTACGGGGAGAGGAAGTGGGCGGCGGTGG
CGCAGCACCTGCCCGGCCGGATCGGCAAGCAGTGCCGCGAGCGCTGGACC
AACCACCTGCGCCCCGACATCGACAAGACGAAGACAATCTGGACTGAGCA
AGACGACATCCTTCTGATCAAGTTTCACAAGATCCACGGCAATCGCTGGT
CGATGATCGCCAGGGAGCTGGTTGGGCGGTCGGAGAACGCCGTGAAGAAC
CACTGGAACGCCACCAAGCGGAGCCTCAAGGCGAAGCGCCGGCTGAAGAA
GAAGAAGAACGCGGAGGCGCCTCCCGGCCAGCAGTGGTCCATCCTGGAGC
AGTACATCCGCAGCCTTCCCCCGGCCGCGGTCGCTGACGACGGCGCCGGC
GGCGGCGTGCCGCAGCAGGAGCCGTCGGACGACTCCCCTCCGTCGTCGTA
CAACACTGGCTCGACCCCACGGGCGCCGGCTTCGACCCGACCGCCTTGGG
GATTGGCGGCGGAGGAGGTCAATCTGGGGGCGATGAACCCCGACCTGGTG
CCGCCGTCGTACCTGGGGCTTGACCTCAACTCCTACTACTACTACAGCGG
CGAGCCGCTGGAGCCGGCGGCGGCGCCGCCGCAGATGTTGATGATGATGG
AGCAAGACCAGCAGGAGCAGGCTTCCAACTACTACGACGCCGGCAACAGC
AGCAGCAACAACCTCATCACCTACCCGTTCGTCGACCAGATGGCGTGGCA
GCAGTCCTCCGTCCACGCCGCCGACGCCTACTACGCCAACAACGACAACG
CCAACGCCAACGCAGGCCATTACCCGTACTACTACTACTACGGCGACGCC
GCGGGCGCCGGGCCGAGCGGCGGCGGCGACGCCGCCGTTCCGGACGACGT
CGACGTCGTCCAGATGGCATCCATGGAGTTCCAGATGAACCCGTCCGAGG
ATGAGGTCACCCTCAACCTCGCGGGCTTCATGTGA
>Pgl_GLEAN_10031141 PgMYB42
ATGGAGAGGAGCCCCGGCGCGGCGCTGACATCGTCGTCACCCGAGGAGGA
GGAGGAGGAGAAGGCGGCGGAGGGCCATGCTGGCGAGGAGGCGGCGGAGC
AGGAGCAGGAGGAGGAGGCGCCGCCGGTGGTGCTGAAGAAGGGGCCCTGG
ACCACGGCGGAGGACGCCATGCTCGTGGACCACGTCCGGCGCCACGGCGA
GGGGAACTGGAACGCCGTGCAGCGGCTCACCGGCCTCCTCCGCTGCGGCA
AGAGCTGCCGCCTCCGCTGGACCAACCACCTCCGCCCCAACCTCAAGAAG
GGCTCCTTCTCTCCCGACGAGGAGCTCCTCATCGCTCAGCTCCACGCGCA
GCTCGGCAACAAGTGGGCGCGCATGGCTGCCCATCTGCCGGGGAGGACGG
ACAACGAGATCAAGAACTACTGGAACACCAGGACCAAGCGCCGCCAGCGC
GCCGGCCTGCCCGTGTACCCGCCGGAGGCGATGCCGCCGACCTCGGCCGC
TGCCACCGCCGGCGGCTTAGGCGGTGGCGTGGCGCTACCGGATCACCATC
ATCAGAACGCGGTGAGCCTGGAGAAGATGCTGCAGGAGCTGCACGACGCC
ATCAAGGTCGACCCGGCGGCGCTGGCCCCGGCGAACGGAGGCGCCGCCCG
CCCCGGCGGCGCTGTCCTGGAGCGGCATGGTGCCCGAGAGAACAAATCGG
GCGGCCAGCATAGTAGGGATGACGACATAGAGACGCTGTTCGACCTGATG
ATCCCGACGCTCAACGCGCCGGAGACCGTGCCGGTGCCGCCAGCCGCTGC
GCCCAACCACTCCGGCTCGACATCGCAGCACAGCAGCGAGGACCAGGACC
CGTCCACCGTCGACCTCGGCGTGGACCTACCGGTCGCCGGCGGCGGCGGC
GGCTCGTCGGACCAGGACTGGGGCCTCGACGGCGTCTGCCAGTGGAGCAG
CATGTCCAGGATCTGCTGA
>Pgl_GLEAN_10021657 PgMYB43
ATGAAAAAGAAGGGGAAGTGGTCCAAGGAGGAGGATAAATTGATCAAAAA
TCACATTGAGAAATATGGTATTGGCCGTAGTTGGCAGGCGCTCTCCAACA
CTCTAGGGCTGCAGCGGTGTGGCCGGAGCTGCCGTTCCCGGTGGCTGAAC
TACCTCCGACCAGGGCTGAAGCACGGAAACTTCACGCCGGCAGAGGAGAG
GATCATCTGCGAGATGTACAGCAAGAGGGGAAGCTGCTGGTCCGTCATAG
CTGCCCAGCTCCCGGGGAGGACAGACCTCGCCATCAAGAACTACTGGAAC
AGCACGCTCAAGAAGAAGTTCCCGGCGGCGAGGACCCCCGCGGCCTACCG
CCGCCGGAACCGCCCAGCCTGCAGCACGTCGTCCGACGCCGGGACGCCGG
CGCGGGACCTGCAGCTGATTGGCTACAGCAGCGAGGAGAGCTCCACGGCA
GGGTCCAGCCCCGCAAAGGCCGTCTTGGCCGACCCAAAGCCTATACAAGC
AGTGCAGCCCCCGGTTCCGGTCATTGCCGCCGGCCAAGGAGCGATCGCGG
CAGTCCCGGTTAGCGGACCGGTGAGGATAGAGCAGAAGCAGGCCGTGGTC
AGCCGGCCGCGTCTGGAGAAGAAGCCGCCGCCGCCGCCACCACCACCGGC
CTGTGATCAGACCGGCGAGAGGGTCATGGACATCGTCTGTGCTCCCATGT
CTCCTGTTCCTCTGAGCTTCATTGATCCGGATGAGCTGCCCTGCATCTAC
CAGTTCGACGACATCGATAGCTTCTTGCCGTGGTTCGATCATCACTAA
>Pgl_GLEAN_10004603 PgMYB44
ATGGGGAGGGCGCCGTGCTGCGAGAAGGAGGGGCTCAAGCGGGGCGCGTG
GAGCCCCGAGGAGGACCAGCGGCTGGTGGCCTACATCCGGAAGCACGGCC
ACCCCAACTGGCGCGCGCTGCCCCGGCAGGCCGGGCTGCTCCGCTGCGGC
AAGAGCTGCCGCCTCCGCTGGATCAACTACCTCCGCCCGGACATCAAGCG
CGGCAACTTCTCCGCCGACGAGGAGGCCCTCATCGTCCGCCTCCACCACG
AGCTCGGCAACAGATTTTTTTTCTGA
>Pgl_GLEAN_10032286 PgMYB45
ATGTCCTTTATCTATAGCAACCAGCAAACTGTGGACCTCATCATTTGCGA
TGTGTTCTTTCCAACTGAAGACAGTTTACTCATTCTGCAAGAAGTTACCT
TAAAGTTTGACATCCCTACCGTGATAATGTCTTTAAACGGAGATACAGCC
ACAGTGATGAAGTATATCACCAATGGGGCTTCAGATTTCCTGATAAAGCC
TCTAAGAATTGAAGAACTTAAGAACATCTGGCAGCATGTGTTCCGGAAGA
AAATTGGGGCGGAGCGCAGAAAGTGTAGCAATGATCAACATATCGATCAG
ATGCTTTATCAACCCATGGGGATCACTGAAGCCACGGCGACGTTGGACAG
TGATGGGATAAGAGGGAATAGCGGGACGGTCACGGATATACGGGACCTCA
GGAAGTCAAGGCTCAGCTGGACTATGCAGCTGCACCGCCAATTCATTGCA
GCTGTGAATTCCCTAGGAACAGATAAGGCAGTTCCAAAGAAGATATTGGA
GATAATGAAGGTTAAACATTTGACAAGAGAGCAAGTTGCAAGTCACCTTC
AGAAATACAGGCTTCACCTAAGAAATTCGACTCAAACATTGCACAAAGAT
GACACTACTTCATCATCGAGCCATGCCCATGAGTCAAGCATTTGCAGAAC
AGAACTCAACACTTCTTCGAATTCATTGTATTATGATCAAGATGGATGCA
TGGAGATCACAGACTACTCCTTGCCCATGGATGGCGGCGTATCAAGTGGC
TCAGACTGTATGCTGGGAGAACGAAACAACTACTCCCCCGAAGGTTTCCA
CAATTTTAGATGGGATCCAGATAAACAGGGATCTGAAACAACATATTTAT
GGAATTTCGAGGTGGAATGA
>Pgl_GLEAN_10011452 PgMYB46
AGGGTTGGGAAACACATAGCTAGAAAAAACAATAGCCATTGGACAGCTAA
AGAAGTGAAGTTACTGGTACATGGTGTATCTAAATTTGGTGTAGGACGAT
GGAGTGAAATGAAGAAGAAATATTTCAAGACATCAGTTAGGACAGCAGTA
AACATTAAGGATAAGTGGCGAAATCTGTTGAGAGCTTACCAGAAAAATGT
GCATAAACATACACTGCTGGACCTGGAGCCACCACTGGTTGAAAAAATCA
GGAAGCTAGCTGTGAAACATCCGTATCCGAAACGAAGGCTCAGTTAA
>Pgl_GLEAN_10010867 PgMYB47
ATGGACTTGGAGCTGCAGCTGCTATGGACAGGACCCGGCAACGAGAAACA
TTTGGACCAATGCATAGGTGTATTTGATGATCATTGCAGTCAACAGGTGG
TCATGTTCAACCCTAATTTTGGTTTGCAAGAGCCTTCCGCGAGTGGAGGG
AGAAAACATGGTAGGAAAAATAATGATCATTGGACACAGGATGAAGTTAG
ACTACTTGTGCACGGTGTATCCGAGTATGGAGTTGGAAAGTGGAAAGATT
TGAAGACAAAATATTTCTTTGCATCAATTCGAACACCAGCTCACTTGAAG
GATAAGTGGAAGAACTTAGTGAAAGCGTGCAAGAAGGAAAGTGGAAGAAT
GTTGCTACCCCTTGAAGAAGCACTCATCGAACGTATCACCGAGATAGACG
ATGACAACCCTTACCCAAAGCAAAGCAACAACATCCACCGTCTAGCGCCG
ACGACCACCTCTCCAGACCTCCTTTCGGAGTTACCCCCTGCGGGGCGATG
GTCTGTGGTGAAGGCCAGAAGTAAGCGAGCTAGCGTGCACAAATCGAAGA
ACAACGATGACGAGGGCACATCCAACATCGAAAATAGAATGGCACAGCAT
GCATATCATGCTCTCAGCTCCCATGGCAGCAGCGCCTCTCCCGGCCGCCC
CCCTGCACCGCGCAACAAGCAGGTCGCCCTGATTAGCACGCGCGCGCTGA
GCTGA
>Pgl_GLEAN_10021368 PgMYB48
GCCGCCGCGCCCACGGCCGTGCCGCTAGGGGACGAGGACGACGAGGGGCC
CAGGAGGGTGCGCAAGCCGTACACCATCACCAAGTCGCGCGAGAGCTGGA
CGGAGCCCGAGCACGACAAGTTCCTCGAGGCGCTGCAGCTGTTTGATCGT
GATTGGAAAAAGATTGAAGCATATGTTGGCTCCAAGACAGTAATACAGCT
AGTAAATTTACATTTTATCAAATATGCTGAAAGAAAGATTGGGGATGATG
TAGCGCTTCAAGTTGTCTTACCGCAACAAGCTTCTCATATAATGGAACAA
GGCTGTGGTACATCTATGGATACACCTACTGAAGCTACTGACTTAAGTGC
AAATGATGCCTTTCTTTCTTGGGAGAATGATCCTGTTCAACAATTCAGTC
CGAAGCATACACAAGTTTCTTTCAAGTGGGTACTGATCACAGATCCTCCA
GGTTCAGGTGCAACAAATAATTGCTCTAGTAGCACAGGCAGCCAATCTGG
AACTTGGCCAACTTCTGAAGCTACAGAGCAAGCTGTTATGCTTCCACCAC
TGCGCGCCATGCCAGACTTTGCTCGTGTGTACAGCTTCCTTGGGAGCATA
TTTGATCCAGAGACAAATGGGCATTTGCAAACCTTGAAGGAGATGGATCC
TATTGATGCTGAAACGGTACTGTTGCTGATGAAAAATCTGTCAATCAACC
TAACTAGCCCAAACTTTGAGGAACATAGGAAGTTGCTTGCTTCACATGGC
TCAAGCATGGATCAAGACATGGGCTCTCCTCACACCGTTCATCTTCCATT
CATGTAA
>Pgl_GLEAN_10004924 PgMYB49
ATGGGGAGGTCACCGTGCTGCGACCAGGACGCCGGCGTCAAGAAGGGCCC
CTGGACGCCCGAGGAGGACAAGCTGCTGGTCGACTACATCAACGAGAACG
GCCACGGCAGCTGGCGCCGCCTCCCCAAGCTCGCCGGCCTCAACCGCTGC
GGCAAGAGCTGCCGCCTCCGCTGGACCAACTACCTCCGCCCGGACATCAA
GCGCGGCCGCTTCACCGAAGACGAGGAGAAGCTCATCATCCACCTCCACT
CCATCCTAGGCAACAAGTGGTCGTCCATCGCCACCAAGCTCCCCGGCAGG
ACGGACAACGAGATCAAGAACTACTGGAACACGCACCTCCGCAAGAAGCT
CCTGAGCATGGGCATCGACCCCGTCACGCACCGCCCGCGCACCGACCTCA
ACCTCCTCGCCAACATCCCCAACCTGCTCGCCGCCGGCATCCCCAACCTC
GCCGCCGCCGCGCAGACCACCTGCTGGGACATCAACGCCCTCCGCCTCCA
GGCCGACGCCGCCAAGTACCAGCTCCTCCAGGGCCTCCTCCGCGCCNNNN
NNNNNNNNNNNNNNNNNNNNNNNNNNNNNNNNNNNNNNNNNNNNNNNNNN
NNNNNNNNNNNNNNNNNNNNNNNNNNNNNNNNNNNNNNNNNNNNNNNNNN
NNNNNNNNNNNNNNNNNNNNNNNNNNNNNNNNNNNNNNNNNNNNNNNNNN
NNNNNNNNNNNNNNNNNNNNNNNNNNNNNNNNNNNNNNGACCTCATGGCA
CTCCTCGCCGCCACCGGCAATGGAGGCGTCGTCACCCAGCCCGGCGTTGA
CCACAGCACCACCACCACCAGGGCACATCATCAGTACGACGGCCTGCTCA
ACCTGCCGGCGTTGACCACCGTGCCGACCGCGACGCTACCGGCGATGTCC
TCCTTCTCCGGCCTGCTCAGCAGCTTCGGCGGCGCTCTCGCCGGGGACGG
CCTCAGCTCGACGACGGAGCTCGGGGCCAGCGGGAGCAGCATGACGGCGG
CGATGGCGCCACCTTTGGTAGCGGCGGAGGAGTGCAATGCTGGCGGCGGC
ACGTCGACGCCTTGCGGCGAGGAGACGACGCCGGCGTCGAGCCCGTTCGA
GGGGCTGGGGAACCTCAACCTCGACGATGAATTCAACAGCGACAGCTGGA
GAGACTTGCTAGAGCAAATGTCATGGCTGAACAACCCGAATGAGCAGCAG
CTGTGA
>Pgl_GLEAN_10029006 PgMYB50
ATGGACCCTACCAAGTCCGACAAAGAGTGGAGTGCCTCTGAGATCAACAT
GGTGAAATCACTCATCGCTAGGTACAATGCCAACAATAGTTTTGCTGATG
GCATGAACAAAAAGCATGATGACATTATTAATGAGGTCCATGCAATGTTT
CCGATGAAGGAGAAGCATCAAGCAATCGGTTTGTATGTTGATCTCGTGGT
ACAGATGATGCAAAGTGGCACCGTTGGAAGCTCCGTTCAACACTCCGGTG
CGGCAAGTGGGGATCTTGTGGACAACAACATTGAAATTCAAGTGGAAGAT
TCAGCCATGGACAACACGGGCATGTTTCTTGGTTATCCAACAACGGATAC
GGGAGCCTTAAGGATGGCACGAGAGGTGCCACATAGGCAGCCCGCTCCTC
GGATGGCAAGGCTTCAAACCAGGTTTTGGACCAAGGCAGAGCACAGATTG
TTCCTTCGTGGTCTACAAATGTATGGTCGCGGCAACTGGAAGAGCATCTC
TAAGTACTTTGTTACCACAAGGACACCGATACAAATCTCCAGTCATGCCC
AGAAGTACTTCAAGAGGTTGGAGAATGCTTCCCGTAGGCAACGCTATAGC
ATCAATGATGTTGGCCTCTACGATGCTGAGCCCTCAGTGCAGAACAACAC
TTGGGAAGGGCTCACCTTCACTAAAGGCGCCTACGACACTTCGAGACCCT
ATGGTGCTAATGGACAGCACACTACCATGAACAATGTGGCCCAAGTTGGA
TCACCCATCCTTAACCATGCCGAAACCAGCAACCAGGCAGGCGCTAGGGC
TGGCGACCAACAGATGGGGACTGCAAGTTCTGACGTGGCTCCTACGATGG
AGGGGGATGTGGGCTTGCAAGAGGCTTTGGCTGGTGATCATCTTGGAGAT
TTCCTTGATGACCTACTGATGGATATGGACCTTTTCTAG
>Pgl_GLEAN_10029495 PgMYB51
GCGGTCGACGAGGGAGGGTCCCGCGCGCTCGCCTCGGACGACGCCGTAGC
CACGGTGGACCAGTTCGAGGCCGCCGTCGGGAACTCGTTCTCGCAGGTCG
TGCTCAGGGGCCTGTGGGGCGACCGGCAAGCCGCGGAGGAGCGGGTCAGG
GAGCTCCTCGCAGCCGAGTGGGCTGCCATGGGGCCGTCAGTGCTGGAGGT
GGTGGCCGAACGGATTGTTGGAGATGAGGCGGTCGGGACCTGGCGTGAGG
CTGATGAGGCCACACGCGCCAAGTTCCGTGTGTTAGCCGGGGAAGAAAAA
ACACGTGAGATTCTGGTCAAACTTGAAGAATCTACCTCTCGTGTAAATCC
AATTTCAACGCCAGAAGTTTCCAAGGTAGTGGATGCTTTAAAAACAAGCT
GTGCTAAGCTTCAGAGTGTAGTGGAGGATCCACTTCCAGCTGCAAAGGCA
GCTGCCGATGAGGTGTTGGCTACAAGGATAAATAGGCCAGTGAATTTAAA
TGCTGAAAGTGGTCAACCAGCAGCTTGTGGCACTGCAGGCCCAAGTGTGC
TTAATGAAAGGAACAATGGTCTGAATAAAGGTGCACCTCCCAGCCTTATG
GATTGGAACCCAACGGCGCGGACCTTTGAGTGGGAGGAGTCGCTTGATCC
TGAGAGTTCAGAACCGGCATTACGTAGGCCGCACTTGCCTAGCCCAAGGA
GAATACCAGTTTCTCCTCTGCCAGCGGCAGAAAACAAAAATAAGCGTAGA
AAGGCAAGGAAGTGGTGCTTGTTAGAAGAAGACACACTAAGAAAGGGTGT
TGAACTGTATGGTAGCGGTAATTGGAAGGATATTTTGAATAACAACCCCG
ATGTTTTTATCGGCAGAACACCAGTGGACTTGAAGGATAAGTGGAGGAAC
ATGATGAGGCAGCCAGCAGCAGAAACCGCCGCCGGCAGTTTTCTCTTCAT
GCTCGGAGCGTTCGCCATGCCGCCCCCGCCTTGTTCTTCGGGTCCTTCAC
GCCTACTTCCCAGCCTCACCCTCTACTCCAGGCGAACCGTCGCAGCCACC
ACCGCGGCCGCCGCCTCCTCGCCCGCTCCGGCAGGAGGGCACGGCCGCAG
CCCCCTGCGCTACGCCGTCCTCGGCGCCGGCTTCGCGGGGCTCTCCGTCG
CGTGGCACCTCCTCAAGCATAGCCCGAGGGATTCCCGCGTGTCGGTGGAC
ATCTACGACGAGAACGGTGTCGGGGGAGGCGCGTCGGGCGTCTCCGGAGG
GCTTCTCCATCCCTACTCGCCTAAAGTGAAGCTTCTCTGGAGGGGTGCTG
AGTTCTGGAAAGAGAGCTTGGATCTCCTCCGAAGCGCAGAGCAAGCAAAT
GGAACAGCCGGGTCAGATACAACTAGTCAAGATCAGAGACTTATCTGGAG
AAGGGGAATTGTGCGGCCACCTACGACTGAGAAGGCCGCTGACATATTGC
TGGAGGCCCTGTTCTCAGCATGCCAAAATCTAGCATATGAAGTGTCCTCA
TTACCAAATGAGCATAAAGAGATCAAGCTTTACAAGCAACATGTTGATAA
TCTACACCAATTGGCAGGTGATTATGATTCAGTGATCATCTGCCTTGGGG
CCAAAGCTTGCTCACTTCCTGAACTAGCAAATAAGTTGCCTCTTAGAACC
TGTAGAGGAGTTATCGCTGAATTTCAGTTGCCATCAGATACAGTGGAAGA
ATATGGCAATCAGAGCCCTTCGATCTTATCTGATGCATGGATGGCATTCC
AAGGTCCCCGCACAGTTTCAGTTGGGTCAACTTGGCAATGGAAATCTGAG
AACTACTCTTCAACTGTATCTGATGAAGAAGCTATTACTGCAAAGGATGA
GCTGCTCCCAAAAGCTTCTGGTGTTTATCCAGGAATGAGTAAATGGGATT
TTGTACACGCAAGGGCTGGGATACGAGCCATGCCTCCACTAACAACCAAT
GGGTCATTACCACTTTTGGGTTGTTTAGATGAAATGGTAAGCAAGAAGAG
CAACTGCAAATTTTGGCTAATTGGTGGGCTTGGTGCGAGAGGCCTTCTGT
ATCATGGTTTGGTTGGGAAGCTGACTGCCAAAGCTGTTATTTCCTGTGAC
GAAAGTGCAATACCTTCTGAGTTCACTTGCTGGAAGGGGATTAAGCCTTC
GCAATGA
>Pgl_GLEAN_10036530 PgMYB52
ATGATTGATGATGAGGCCAATTTCGACATCCTTGATGCCTCAGAAGAAGT
GCAGGCTGCTGCTGCAAAGTTCCGTCCCAAGCAACGGGCCAAACCCCGAA
AAACTATTTTGTCATCCAGATCTGCAGCATCTCATCCTACTGTAGAAAAT
GGAAATGGAAAACTAGGAGTCTCAAATCAACTCAGTTCTTCTAAAGAACT
TGCTAGCCAAGAAAGAGCATCCTTGACCTGCCCTGGTAGTGAGACAATTG
ATGATGCAGCTGGTTCTCAAGGTATTCTTGAGACACCATCAGCTGATGTG
CTGACAGTTCCATTGAGAGCTCCAGGTGGTACATCTGCTGCAGATAGGAT
TTCTCAAGATGACAAGCACGATGCTGATTCATCTAAATTAGTTATGCATA
AAGAAAGCTTGGTGATTCCAGATATCCAAGTGTCACCTGCCAGTTCATGT
GGCAGGACTATTGATGATATAGTTGAATTTGAGGAACTGTTTGGTGCACA
GGATAAGGAGGAAAGAGTTGCAAAGTTCCAGCCAAAGGTACAGACGAAGC
TCCTTAAGGCCACCAAATATCAAAAGACTAACCAAAAGGTTGAAGCTTCC
CCTGTTGACGTGGCTACACAAAAGGAAAGCGGTGATAATATTCAGACAAG
ACTCCATTATGACCAGCTACAGGACACTAAATGTCATGGAAGCATGCAGA
CCTCATATTCTGAAGGATTATTGGTAACCAGTAATAGTGATATTGGCAAT
TTAGCGAACCTTGACAGCGTCCATGAGGTGTCAGTTCAAGAGGAAACAAT
AACAAAGTTTTGTCCTAAATTGCAACCGAAGCATGGGATGGTTTCATCGA
AGGTTGTTGGGACTAACGATAATTCCACTGCAGATACTCTGATGGTTGGA
ATTTGTGCTGAGAACAATGATATGCCAATAAAACCTAAAGATCAAGAAAC
CATCACCACTTCAGCCACTTGGTCGCCACAGGATGCGGTTGCTACTGTTG
ATTTAGACAACCACAATGAACTAATTAATTCTCCTATTGATGGTACTCAA
TCGATGGTTGGAGAAGTCCCAGCTGAAGCTACTTGTAAGTCTCAACCTAA
TGCTGGAAGAGAAAAGGGGAAAGGGAAATCTGTATCTTTTGCAATGTCAG
ATGCTTCTGGGGTCGTTACTCCTACCAATTCTGAGATGGATAACTTCAGA
GATTCCTATAATGACAAATTGACTGATGAAAATTTAAGTAACTTGTCTCA
GCAGACAGTTCAAAAGAATTCTAATGATCAGGAACATAATGAGGGGGAAC
CATTAGATCCTCCTTTTGAACAAGAACCAAAATCAGGTGTAGGGCCATCT
ATGAAACTACGTAGCAGGAAAAAGTCACAGAAAACTGGGACACATATGGA
TACAGATAACAATTTTGGTGAAGACTCTGTCGAACCTTCGTTAGCTGAAG
AAGATAATGATAGTGGTGATGATTACACTGCCGGTACTACACGGAAGGTT
AGGAAAAAGCCAAGGGATAGTGCAGAGGAGTTACTTCACCAAAAGGTCCA
AAAGGATAAAAGCCAGGTTAAGACTTTACTGGAAAAACCTCGTGAGGAGA
TAGATCCCATGAAGCTAAGTGCAGCACATCTTAGGTTGCTACAAGAGGCC
AGAGCGCGTGTTAATGGAAAAGAGAATCCACCTGAGCCATCCTCTAATTC
AAGCTTTCAATTTGATGACATGGACGATTTGGACTATAGAGATGAGGAAA
GAAACTTCGACAATGATAGAACACAGAACCCAACACAAAATGTAACAAAG
TTGAACTACCATTCCTATATGAACAAACAAACTCGAGGCAAATGGTCAAA
ATCTGACACTGACATGTTTTACAAGGGTCTTCGACAATTTGGTAGTGATT
TTGCAATGATACAGCAATTACTCCCTGATAAGACTCGTCACCAGGTGCGT
GCAAAATTTAAAACCGAGGAGAAAAAAAATCCGTTGCTGGTCCATGATGC
TATAATTCATCGCTCAGGAGATAACCTGTATTTCAAAACGGTAATTAAGA
ATCTCAACATTGAGGATGTTGCACAACAAGAGATTAACAATACCCATAAA
CAAGATGGCGCATCAAGTGAACAAGGCCCTGGAAAAGAGGATGTACTTGA
TGATTTCATCCGCGGGGAGGAAGATGATCTGAATTGGTTGGATGAAGAGC
ACAGTGTACAAAAGCCTGATGTGCAAGAAGAGCATGCTTCTGGAAATGTT
GACGATGGTGATCTTGGGGATGTTTTCGATTGGTACTAG
>Pgl_GLEAN_10023193 PgMYB53
ATGGGGAGAAGGGCGTGCTGTGCCAAGGAAGGGGTGAAGAGAGGGGCGTG
GACGAGCAAGGAAGACGACACCTTGATCGCCTTCGTCAAGGCCCATGGCG
AAGGCAAGTGGAGGGAGGTCCCTCAGAAAGCCGGTCTGCGCCGGTGCGGC
AAGAGCTGCCGCCTGCGGTGGCTCAACTACCTCCGGCCGAACATCAAGCG
CGGCAACATCTCCGACGACGAGGAGGACCTCATCGTCCGGCTCCACAAGC
TCCTCGGCAACAGGTGGTCTCTGATCGCAGGGAGGCTGCCGGGCCGAACA
GACAATGAAATCAAGAACTACTGGAACAGCACGCTCGGCCGGAGGGCCGC
CGGCGGCGGCGGCAATAGGGTCGTCGTCGTCGGGACGCCCGACACCGGCT
CGCACTCGGACGCCACCCCCACCGGGGCCGCCACCGTGTGGGCGCCCAAG
GCTGTGCGGTGCACGGGCGGGCGCCTCTTCTTCCACCGGGACCTGCGGTT
GGACGCGTCGCCCGCGGGCGAGACGACGACGCCAACGTCCGGGGGAGGAG
GAGTAGTCGGAGGGTGGAGAGAAGGGTCGTCGGACGACTACTGCAGCCCG
GCGGCGTCGGCCTTTGCGGGCGCCGACGACGACAGGGCGCCGTGCTTCTC
CAGCGGCGGCGACTGGATGGACGACGTGAGGGCCCTGGCGTCGTTCCTCG
AGTCCGACGAGGAGTGGGTCGTCCGGTGTCAGAGAGCCGATCAGCTGCAG
TAG
>Pgl_GLEAN_10023203 PgMYB54
ATGGATCCCACCCAGTCCAACGGAGTGTGGAGTGCCTCGGAGATCAACAT
GGTGAAATCACTCATTGCTAGGTACAACTCCGATAACAGTTTCACCAATG
ATATATACAAGAAGCATAATGACATTGTCAATGAGGTCCATGCAACCTTC
CCCTTGAAGGAAAAGCATCAAATAATCTGCTTATATGCTAATCTTGTGAT
GGAGATGATGCAAAGTGGCATTAGTGATGGCTCCAACCATTCTACAGTGA
CGAGCAGGCAACTCTTAAACAACAACATTGAAATCCCAGTGGAGGATCCA
ACCATGGACAACATGGACATGTTGTTTGGTTCTCCAACAATGGAAATCGG
GGCCACGAGGGTAGCACAGGAGGTGCCACTTAGGAAACCTACCTCTCAGA
TGGAGAAGAAGAACATTGGGTTCTGGACCAAGCCAGAGCACAGGTTATTC
CTTTGCGGCCTGCATGTGTATGGTCGTGGTAACTGGAAGAGCATCTCTAA
GTACTTTGTCAAGACTAGGACACCAATGCAAGTCTCTAGCCATGCTCAGA
AGTATTTCCAGAGGTTGGGGAATTCTAGTCGTAGGCAACGCTATAGCATT
AATGATGTTGGTCTCTATGATGCTGAGCCCTGGGCACAGTACAACACTTT
CAACAAGGAAGGTTCCACCTTCACTGGTAGTATTTACAACCCAAACCGCT
ATGGTGGTATTGGGAAGCATGCCACCATGAAAAACCTAACTCAAGTCCAG
TCACCCAACCTTCATCATGCTAGCCAAGCCACTAATGACAATGGCCAGGC
AACTGCTTGGGTTGGTGACCAGCAAATGAGGGCTACTAGTTCTTCTGCCC
CTCCAATTATGCAAGGGACTCGAAGCCCCCAAGTGGCTTGGGCTGGTGAT
CAACTTGGGGATTTCTTTCATGACCAACTGATGAATATGGACATGATCTA
A
>Pgl_GLEAN_10028194 PgMYB55
ATGGGGAGGCCTCCGTGTTGTGACGAGAAGGGCCTCAAGAAGGGTCCCTG
GACCCCTGAGGAAGATCATAAGCTCATGAATTATATCCAAAAGCATGGCC
ATGGAAGTTGGAGGGCACTACCTGAACTCGCTGGCCTGAACAGATGTGGC
AAAAGCTGCAGGCTAAGATGGACAAACTACCTCAGGCCAGATATTAAGAG
AGGAAAGTTCTCCAAGGACGAAGAGCAAACCATCCTCCAGCTCCATTCCA
TCCTTGGCAACAAGTGGTCAGCTATTGCGAAGAATCTCCCTGGCCGGACA
GACAATGAGATCAAGAACTTCTGGAACACCCATCTCAGGAAGAAGCTCAT
TCAGATGGGTATTGATCCGATGACCCATCGCCCAAGAACAGACTTCTTCG
CAGCACTCCCACAACTAATAGCGCTTGCCAATCTCCACCAGCTCATTGAG
CAGCAACAATGGGACGGCCACACTACCATGCAACAGACTGAGGGAGTCCA
GGCTGACAATCACCAGTACATGCAAGCAATGCTTCAATCTGCAGCATCGT
CCACTACACCAAACCCCATCACAGTCAGCAGCCTCACCACTGACCTAGAG
CAGATCAGCCTCCTCAACCCACAGCATATGCTTTCTCCAACTCTTCTTGA
GAGTATAGATGGTGAAGACATAGCCAGGCAGGTGCCACAAAACCAGCCAA
TCACTTTCTTTGACCAACCAGTTAGCAATATCAACCTGAGTTCAGATAAC
AATGTGGGCAGCAGTGAGCGATGCCTTGTTGAGGGAGGGAGCAGTAGCCA
GAAAAGCATATTGCTATCTGAGAACTCACTACCACCACTCACGGACATGT
CAGCCTCCAACCCTCGCAATGCTATCAGCACCTTAAAATGCGGAGCCAGC
AGTACACTTACACTATCACCTAGTTGGTCAGAAATCCTTCTTGATGAAGA
GCTCATGAGAGAATTTGAATGA
>Pgl_GLEAN_10005446 PgMYB56
ATGGATCCTAGGTTCAATGGAGAGTGGACCGCATATGAGATCCAAACAGT
GAAATCTCTCATTGCTTGCCACCACACCAACAATAATCATGCTAACAACA
TGAACAAGAAGCACACTGACATTGTTGATGAGCTCCAAGCAATGTTCCCT
TTAAAGGAGAAGTATCAGGTAACCAACTTATACATTAAACTCATGGTGGA
GATGATTCAAAGTGGCAACAAATATGTAGCAACAAGTAGAAACATCATGA
ATGGCAACTTTGGAATGACAATGGAGGATCCTACCATGGGAAACATGGAA
GAAGTGCTAAGCAGTTCTCTTATGGAGGAGATGGGAGCCATGAGGAATGG
AGAAGAGGCACCGCATAAGCAATCCACTATTCGAAAGGAGAGGCAACGTG
CCACAAGGTTTTGGACTGAAGAGGAGCACAGGCAATTCCTCCATGGTTTG
CATGCATACGGTCGTGGTAACTGGAAGATGATCTCCAGGAACTATGTTCC
TAGCAAGACCCCAGTGCAAATCTCCAGCCATGCCCAGAAATATTTCCAAA
GGCTACAAAATCCCACTAAGAAGCAGCGCTATAGCATTAATGATGTCGGC
CTCTATGAAGTGCAGCCTAGGGCACAAAACAATGTTTCTAGCCAGGAGGG
GCTCACCTTCACAAGAGGTGACTACAACACAAATCACGATGGCTCTGGTG
GCCAGCCTTCTATTCTGACCAATCTACCTAAAGTTAGGTCACCACTTCCG
CACATTGCTAGCCAAGGAAGCAACATCCAGGCTGACACCTTGGCTACTGG
TCATCAGCCAGATATGGAAGCTAATGGTTCTTTTCTAGCTCCATCAATGG
AGGGGGGTGGGAACCACAAGGCTTGGACTAGTGATAATCAAGGAGAATTT
CTTGATAATGAGTGGTTCATTGATCTACAAATGGACTAG
>Pgl_GLEAN_10032646 PgMYB57
ATGGGGAGGCAGCCGTGCTGCGACAAGGTGGGCGTGAAGAAGGGCCCGTG
GACGGCGGAGGAGGACCAGAAGCTCGTCGGCTTCCTCCTCACCCACGGCC
ACTGCTGCTGGCGCGTCGTCCCCAAGCTCGCCGGGCTGCTGCGGTGCGGG
AAGAGCTGCAGGCTGCGGTGGACCAACTACCTAAGGCCCGACCTCAAGCG
GGGTGTCCTCTCCGACGACGAGGAGCGGCTCGTCATCGACCTGCACGCGC
AGCTCGGCAACAGGTGGTCCAAGATCGCGGCGCGGCTGCCGGGGAGGACG
GACAACGAGATCAAGAACCACTGGAACACCCACATCCGGAAGAAGCTCCT
CTGGATGGGGCTGGACCCCGTCACCCACCTCCCGCTGCAGGAGACCCCCG
CTCCTCCTCCTCCTCTTCCTCCTCAAGAGCAGCTGGAACAGCCGGCGCCG
GCGCCGGCGTCGCAGGAGCAGGGACACCAGCATCAACAGAACGACGGCGG
ACTCATGCTGCAGGACGGCGACGCGACGGAGTGGCCGGAGCCCATGTACC
TGTTCGGCATGGACGACGGCATCATGGACGCCGGTTGCTGGGACGGCCTC
TTCGCCGGCTGCGGCGGCATGGGCGTCGACACGTTCGACGGGTACCCTGC
CGGCGGCTTCGACGACCAAGACGACTGGCCGTGA
>Pgl_GLEAN_10036901 PgMYB58
ATGGAAAGGGTTTCTGCTGCAGAGAAGGCTGTGATAGGCAACAAGGGGGA
GAAAAAAGGCCACAAGAGCAAGAAAGACAAAGGGAAGCGAAAAGGAAAGA
AAGACAAGGCCCAGGGTCATGGGGGTGATGGTGATGGATCAATTCAGTCT
GATGACATGAATCATAGTGTTGAGATAAAGCAAGCTGAAGTTTTGGTTGA
GATGGCTGAAAAACCATGCTTGGAGCATACAGAAGACATCGCGAGCAAAA
ATGATGTGAAGGAACACAGGAAAAAAAAGAAGAAAGATAAAGAGGCTGAC
ACCATCAGCCAGAAGCAAATACTTGCTGTTAATGATGAACGTGTTGGGTC
AGGATATTTAGAAAGGAGTATGGGAAAAGGAGAACATCATAGTGTGTCGA
AGAAGGGCAAACAGAAGCACCAGGATGCTGAGACTTCCTTAAATGGTTCT
TGTGATGATAAAATCATTTCAAGGGGCGATAAGAAAAAGAAAAGGAAGGA
GCGTTCAGATACCCCGGAAGAGGTCAATGAAGCTGACATGTCAATGATGG
GGCAGAAGGCAGATGGCAAGAAAAAGAGGAGAAAGGAGAGAGATAATGTT
GGTGTAGACCTAAGTCAGAATATAGCAGCTGGAAATGGGAACAGTCGCAA
CAAAGAGGAAAAAGCGAGTAAGGATGGGTCAGGGTATTTGGAAAGGAGCA
TTGGAAAAGGAGAACATGGTAGTATGTCAAAGGGCAAACAGAAGAACCAG
GATGGTGAGACTTCTTTAAATGGTTCTTGTGATGATCAAATCATTTCAAG
GGGCGACAAGAAGAAGAAAAGGAAGGAGCATTCAGATACCCTGGAAGATG
GCAATGAAGCTGACATGTCAATGATGGGGCAGAAGATGGAGGGCAAGAAA
AAGAGGAGAAAGGAGAGAGGTAATGTTGGTGTAGACCTAAGTCAGAATAT
ACCAGCTGGAAATGGGAACAGTTGCAACAAAGATGAAAAAGCTAGTGAGG
ATGATAATGGTGGTGGCAAAAGCAAAAAAGTAAATGTGGCACATGGAAAG
GACAAGGGTAAACGAGTGAGCTTCACTGATGATGTGGAGGTATATAAAAT
AGATGGTGGTGATGGTGATGAAGAGGGTGATGGGAGTGATGATTCTGAAC
TGGTGCATGGCCAACGGTTTACTCTTGAGGAAGATGTGAAACTAATGGAA
GCCATCCAGGAATATTCAGAGATAAACCAATTGGGGGAGAGAGGGTTAGA
GATGATTCGGGAGTGCAGCAAATATCCAGAGATCAGGGGTTGTTGGGCTG
AAATAGCAAAATCATTACCTCATAGACCCGTGATGGCTGTGTACAAACGA
GCACGGATTTTACTTTATAGAAGTGATGAACGTAAATGGACTCCAGAGGA
GTACGAGATAGTTCGACGGTTTGTTGAAAAGAATGGCACAAATTGGAAGG
GACTGGCAACAGAACTTGGAAAGAGTGAAATCCATGTAAAAGACGCATGG
AGACGAATGAAACCCAAAAATTTAAGAAAAGGGGCTTGGACTCAGGATGA
ATACCAAAACTTGTTTGATTTGGTAAATTTGGACTTGCGTGTGAAAGCCC
ACCAAAAGATCACTCCTACTCATCGCCAGCTAAAAGATAACATTTCCTGG
GAGGCCATCAGTGAAAAATTAACCACCCGAAACAACAAGGACTGCTGCTT
GAAGTGGTACCAGCAATTAGCATCGCCACTGGTTAAAGAAGGAATCTGGG
CAGATACTGATGATTATCTGTTAATGGAAGCGCTTCAAAAGGGTGATGCT
GTTTGTTTTGAAGATGTTGACTGGGATAGACTTCTTGATCACAGATCTGG
GGAGCTTTGCCGTCGACGTTGGAACCAGATGGTCCGCATGATCGGCGGCC
ATAGAGAGAAGCCTTTCATTGAGCAAGTGGAAGTGCTTGCCAGGCGTTAC
TGCCCAGAAATGCTTGACTACAGGAAACCTGAAGCGAGACAATCTGACGC
ATCTGACTTAGCGCCAGATGAACTTGCTGGAGAATCTGACTCGTAA
>Pgl_GLEAN_10023164 PgMYB59
ATGGTAGATGCACATTCCACAAAAGATTGGCCAAGCATTGCACGGGCTGT
GCCTGGTCGTAGTCAAAAGCAGTGCAGAGACAGGTGGACACATTATCTTG
ACCCTGCTGTGAACCAGATGCCGTGGACGGAACATGAGGAGATAGATCTT
ATCCGTGCTCACAAAATCCATGGAAACAAATGGTGTGAACTGGCTAAACT
CTTTCCTGGGAGGACAGGGAAGGCAATTAAGAATTACTGGACTGGTGCTA
TGAAGAAAAAAATCAAGTGGAATTTAGGTAGTGGATCGCCAGAGCAACTT
TCACCCTGCCCCAATGATTCAATGATTCCAGTGGGTAGGGACTCCACCGC
GACAAGCAGTCAAGATTCATCAAATAATATTCAAGTTTCATCAGCCGATC
TGCCAGTAAGACCTAAATCTAAACATGGACTCCCAGAATCTTGTAGAAAT
GTGTGTACACTGAAAGAAAAAGGTTCTGATTCTATACACGACGAATGGTC
TGCACCTCATTCAGTTCATGTCTCACAAATGGTGGATGGGCAAACAGTTG
GATCTAGTTTGCCCATACTAACCGAGGAAAATTTGGTTTCGTCGTTAAGT
TCAGTGGGTGAGAAGCTCTCTTGTGTTGCACCGAATTCTACAAAGCCCCT
GAAAGAAGAGGAATCAACAAAATTTCTGGAAATCCCACAAGCACTTGCTT
GTTTTCAATCAAGTAATTCACATTCTGATGTGATTTGCAGTAGTGGTGAC
CCCGAGTCACGGCAGCTACATCTGGCAAGTATAGCAGATCTTCTGGACAT
GTCATACTGCGAGAGCTTAATGGTCATCGCACCTGATTCAAGAAATGAAG
AAGATTTCATGCGTGGGATGTGA
>Pgl_GLEAN_10023163 PgMYB60
ATGGAGCAGAGTAGCGATGGGATGCCAAGGCAGCGATGGAAATACATTCT
AGACCCAGCAATAAACAAAGAGGCTTGGTCGCAGCAAGAGGAGCTAAGAT
TGATTCGTGCACATCAAATATATGGAAACAAGTGGTGTAAAATGGTCAAA
CATTTCCCAGGGAGGACAAATAATGCACTCAAAGAACACTGGAGAGGTTC
TATGAAAAGAAAACTGGACTCATATTTAGCCTCAGGGTTGCTTGAACAAG
TTCCTGATCTGCATGAAAATCTATCAGTTCCGCAGACCAGTCAGTCAGAT
AGTCCAAAGGATAGCGAAGTTTCATATGATAGAAGTCAATTTTCATCAAT
TTTATCGACAAGTTTCAAACTTAAGCAAGAGCTCAGAGAACTAAGTGAAA
ATGCTGATACTTCAGTAGGAGAATGCTCTGATTTCACCTATGCTAAAGCA
CTTGATGCCCATTCAGCCAAAGTTTCTGAAAGTATAATAACTAAACCGCA
GCAGTGTGCAAAAGCAAGAAAGAATCTGGATTTGGTGTCAACCCCAGTGA
AGCTCAAGGAAGACGAAATTCTCACTAAAATGGTTACCAAGCATGGGCTG
AAAAACTGGCAAACTATCGCATCTGCTATACCTAGCCGAAATGCACAACA
ATGTCGAATAAGATGGACACGCAGTCTTGACCCAGCAATAAACAAACAGG
ATTGGTCTGAAGAGGAGGAGCTAAAATTGATTCGTGCCCATCAAATATAT
GGAAGCCAGTGGCTTAAAATGGTCAAACATTTCCCAGGGAGGACAAATCA
TGCACTCAAAGAACACTGGAGAGGTCGTATGAAAGGAAAACTGAATTATT
ATTTAGCTTCAGGACGGCTCGAACAAATTACAGACCTAAAAGAAGATATA
TCAGTTCCAGAGAGCAGTCAGTCAGATATTCCAAAGGACAGCCAGGGTTC
ATCTGAGAGTAATCGACCACCATCATATTTACCACCAAGACCCAAATCTA
AAAGTGACCTCTCTGAACTTGATGAAAATGCTGATACATCAGAAGAGGAA
AGTTCTGACTGCATCTATCCTAAAGGTCTTGATGCTCATTCAGCCAAAGT
CTCTAAAAAGATAATGTCTAAATCAAAGCAGCGTGCTAGAGCCAGAAAGA
AACTGGATTTTCTGTCAACCCCAGTGGAGCTCAAGGTGTGTACCGCCGCA
GCAAGTTGTCAAAGGCCTCCCCTGAAAATGGAACAAACAACTCCAGCCAG
TGACAATAACTCTCCGTCAGATGAATGCCAAGGTATTCCACAAAATGCTG
CATCAGAACCTGTGGATGTGGTTATACCAACAGCTGCTAGTAACCATCCC
AATGATGTTCATTCATTGGCAAACCCAGATATATGCTCACTGGAGATACA
AGAGACGGATGCTTCAGATCTTCTGGACATGTCCTACTGTGATGGCTTGA
TGATCGATTCGCCTCCGTATCTGCATGGCAGTAGCTTCATATAG
>Pgl_GLEAN_10037977 PgMYB61
ATGGTAGCTAGGGAAGAGCTAGTGATGGAAGAGATCAAGGATAAGGGAGT
ACTTGTAGAGATACTTGAGGATGATGAGGAGAGATCGATTGATAACAAGC
TGCTAGACCTCAACGAGGGTCTCGATGTGGAGAGCGACGAAGGGGAAGTA
GGTGATGACGAGGAAGATGAAGGTGAAGAAGGCGACGATGGCGGTAGCAC
CACCGATGTTGGTAGGAGCGGGAGCTCAAGCAACAATAGTAGCACCAACA
ACAATTCGGAGACCAAGAAGGGAGACAGCAAGTCAGAGGGCAGCGGTGAG
CAGAGGGTTCCAACGGTGCGGCAGTACAACCGGTCGAAGATGCCCCGTCT
CCGGTGGACGCCTGACCTTCACATGGCCTTCGTCCATGCCGTCGAGCGGC
TTGGTGGGCAGGAGAGAGCAACCCCTAAGCTAGTCCTTCAGATGATGAAT
GTCAGGGGACTCAGCATTGCTCATGTCAAAAGCCACCTGCAGATGTACAG
AAGCAAGAAGCTAGACCAAGACGGTCGCCCGAGGGGAGCTATTTCCTCAG
TGTATTCCCCGATGCATTTCCATTTCATGAGAGGCGATCGGCGCTTCCAA
GAAATGTCATTCTTCCAAAGAGCGGCCATGCTCACCTCCTCCAAATTGGA
TCACGGCAGCTTCGCGTCGAGGAACTGCAGCGCCCCGGAGCTCAGCCGCC
TCTACGGACTTCTCCAGCATCGGCCGACTGCGCAAACTTTTGATTTCAGA
AACTCCAGGAATCATGAATGGGCATCCAGCCATAGAGAGGCCATAATCTC
AAGGAAGGACGTCACGCCGCCGTCGACTGCTGCACCGCATCAGACGCACC
CCCTTGCAGGTTCGGTGTTGCTGAGGAGCGAGAGGCGGTGGTGGCCTTTC
ACTGACTCCCGCGCTACTGCCGCCGCCACCGGCGAGCGGAGGGTCGTGGC
AGAGACGACAGGAAGGGAGGTAGACCTCTCCAATTCCATCGGGAGCAGCT
CTCAGCGCCCTCACCACTGGACCGCGGCGGTGTCTGGTGAACCCCGTCAT
CTTCCCTTCAGATGGCGACCAGCAGGGGGAGGCGGCGGCAGAGATGTCGG
CGGCGGCTACCCCGGCAACAGCGCCAAGATCACACCAAGATCATCATCGG
ATCCTGTCGTGATCGACGAAGCCCTAGATTCCCAGCAGCTTGAGCGGCAG
AAGCACGTAGCACAAAGGGAATCTGCCATGCCGGTTTACGATGCGTGCCG
CAAGCGGTCGTCGCCGGAGGAGGCCCAAGACGAGACTTCGGACCTTCAGC
TCAGCTTGTCCCCCACCACGGTGATGGAGGGCAAGAAGAGAAAGACCACT
GCACTAAGCAGCAGTGAGCAAGAGATCATGGACATCAGCGAGCTCTCCAT
CTCACTCTCACTGTCGCCACCCGATGCAGCTTCCATGCAGAAGCGGCAGC
AAGAAAAGACGAGACGAAGCAACGACAGCAGAAGCGGCGGCAGCAGCGGG
GAAGCCGTTCTTGGGCAGAGTACTTTGGATCTGACCATGTCGATCAGGGC
ATTGGAGTGA
>Pgl_GLEAN_10028237 PgMYB62
ATGTCGAGGCTTTTGCAGAAGAAAAGGTTATCAGACATGCTTGGGCCTCA
GTGGAGTAAAGAAGAGCTTGAGCGCTTCTATAGTGCTTACAGAAAATACG
GAAAGGATTGGAGGAAGATTGCCAGTGCTATCCGTGATAGAACATCTGAT
ATGGTGGAGGCTCTTTACAACATGAATAAGGCCTATTTATCTCTTCCAGA
GGGAACAGCAACTGCCGCAGGGTTAATTGCGATGATGACTGACCACTACA
ATATTCTGGATGGAAGTAACAGTGATCATGAAAGCAATGATTCACCAAAA
ACTTCTAGGAAGCCACAGAAACGTGGACGTACAAAGTTTCAATCTGTCTC
AAAGACATCTGATACGCGTTACCCTGATCAATTGCAATCTCAGCCTGCTT
CATCGAGCTATGGATGCCTTTCTTTGTTGAAGAAAAAACGTTCAGGAGGT
AGCAGGCCACGTGCTGTTGGAAAAAGGACTCCAAGAGTACCTGTTGCCAA
CATGTACCATCGAGATGAGAGGGGTGCACCACAAAGACAGGCAAAACCAG
ATTCTAACCATGGTGATGATGAAGGAGCTCATGTAGCTGCACTTGCTCTG
GCAGAGGTATATCAAAGAGGAGGCTCACCTCAGGTTTCTCAAACACCTGG
GAGATCTGGCGACCGGATGTTCCTGTCTCCCATAAAAAGTAGTGACAGAA
AGAATGCTGATTCAGAAATGGGAAGCTCAAAGTTGCATGGATTTCAGTTG
GATGCTGATTACCCTGAAGCTAGCTTAGGAAGTAGGGAAGCCGAGACTGG
TGACTATACTAAAGGTGCATCCTATTTGATGACTAACAAAGGATCTCCAT
CTGGAAAACCTCAGAAGAAAGTAAAGAGGTCCCAAAAGAGGAGGAAAAAA
GCTGTACGCAAAACAGGTGATAAGTTTGAATATGATAGAGAGGCTTGCAG
TGGTACTGAAGAAGGACATAGTGCAAGAAAGACGAAAGAAGAACCAGAGC
TGGAGACATTGGGAAGAAAAACTGCGTGGCCATCTAGCACATCAAATAAA
AGAAGCCGTCAACTGTTTTTTGATGATGATATTTCAGCTCTAGATGCATT
ACATACTTTAGCTGATCTATCTGTGAACATCCTACAACCATCTTCAGTTG
TTGAATCTGAGTCGTCAGCACAGATTAAGGATGAAAATAAAGACAACGAT
TCTGATGGAAAGCCTAGTATTCCTGCAGGCGTTTCGGTGTATGAACAGAA
AGATAACTCCAAAAGTATGGCAAAAAAACTCAAAAGGCAGTCTGAAATTG
CAAGCACTGATATGGTTACTAGGAAAAAAGCCAAAGTTGCTAAAGATCCT
CATCATGATGGGAGCACCACATCTGAAGTAAAGCAGCAAGCTTGTACATG
TGGTGTTAAAACAGAAAAAAAGAAGAGGAAATCTTCCACGGGAAAGGTTT
CAAAAGATGAAAAGAATATACTAAAGGACGTGGAGAAGACTGAGGTTTCT
GCTGAAGAAGGGAAGGTATCTTCTTATAAAGCGTATACTGATTTTGGAAA
AGTGTTCGTGGATATACCAGAGACAACTGCACAAGCTGCAACGCCTCCGC
AAGCTGACTTGGCCTCTAAGGTTAAAAGCCTCCAAAAATTAGGCATTCAA
AAATCACTAACTCCAGAATGTAAACCTACTGAGGGTGCTGGTGATTCTGG
AATTGATAAATTGTCTTCTTCATTGAGTAATATTATTGATGTCGAGGATA
AACTCTCTCACGGCTTGTCATCACGTTTGCTCCGTAGATGGTGCATGTTT
GAGTGGTTCTATAGTGCAATTGATTATCCATGGTTTGCAAAGAGTGAATT
TGTTGAGTACTTGAATCATGTCAAGCTGGGTCATGTTCCAAGACTGACTC
GTGTTGAGTGGGGTGTCATACGGAGTTCTCTTGGAAAGCCCCGTCGATTG
TCGAAACAGTTTTTGCATGAGGAGAGAGAGAAGCTTTCCCAGTATCGTGA
TTCAGTCAGACAGCACTATGCTGAACTTCGATCTGGCGTTAGAGAAGGTC
TACCAACGGATCTTGCACGACCTCTGGCAGTTGGGCAGCGTGTTATAGCT
TGCCATCCTAGAACCAGGGAACTTCATGATGGAAATGTCCTGACTGTTGA
TGATAATCGTTGCCGTGTTCAGTTTGATCGACCTGAACTGGGTGTTGAGT
TTGTGATGGATATAGATTGCATGCCCCTGCATCCTCCGGAAAATTTCCCT
GAGTCTCTCAGACAGCAAAATATTGCCAATGAATATTATAGTCGCTTATC
GGAAGCAAATGAGGAACATATGAAAGAATTGTGTAATGGAGGTGGAGCAA
GATTCACATCTAATTTGAATGGTGCTGATGCAGCCTTCCATATCCCTCCT
GGTCATCCGATGAGTACTTTAATGAAGCAAGTGAAGGGTGACTCAATTGA
TTCCATTGCACAGGCCAAAGCTACAGTTAATGAGGAAGCTTTGCTAGTAG
AATTGAGGCACATGAATGAAGAAGTGTCTGGAAAGCAAAGGGATGGGGAA
ATCATTAGAGACTTGGAGCATTTCAGGAAGCAATACGCCATGGTGCTTGT
ACAGATAAGAGATTCCAATGATCAAGTAGCTGCAGCCTTGCTTTCGCTTC
GCCAGCGTAACACATATCATGGGAATCCAGTACAATCATATCCTAAATCT
ATGGAAAATGGAGCCTTTGCTGGAGTGCCAGATCCGTATAACCTTTTCGG
TTATATTAATCCAGAGTCTGGTTCCCAAGTGATTGAAGTTATCGAGACTT
CAAAATGCAGGGCAAAAATGATGGTTGATGTTGCTATCCAGGCGATGTGC
AGAGTGAGTGAAGGAGAGAACCCCTTTGCAAAAATAGGTGAAGCATTAGA
TAACTTCAATAGTCGTGGTACTGGCTCTGGTTCAAGCATTCTTGGCATAA
GACGGATACCTCCTGATTCAGGTCAGTCAAATGCATCATATCAAGAGAAT
GGCACACCTTCTGCAACAAATAACAGTTCAAGATTGGCAAATGGTGGTAA
CACCGATGGCCAATTTCCTAATGAGTTGATTTCATCCTGCGTCGCTATGA
TGCTTATGATAAAGAACTGCACGGAGAAGCAGTATCACCCTGCTGAAGTC
GCGCACATCCTCGATTCAGCGCTGTCAGGCTTGCAGCCGTGCAGCTCCCA
GAACATCCCGATCTTCAGGGAGATAGAGATGTGTGTGGGCATCATCAAGA
ACCAGATGCTGGCGTTGATACCCACTGCAAGTGGCTAG
>Pgl_GLEAN_10017572 PgMYB63
ATGGCTACAACGACGGCGCCGGCGCCAGCGACGCCGGCCAACACCAACTT
CGTGCCGACACCAACGGCTCCGCATCCACGCCCCGCAGCCCCACCCGCTT
CCCGGGCCCCCTCCACCTTGGGTCCCGTCAAGTCGGAGGCCCCTCCAGCC
CCCTCGTCCACTACCGCCGCTGCTGCCGCCGCCGCCGCCGCATCCGGACC
GGAGGACCCACCCTACATCATCACCGTCCCGAGTTACTCAGCGTGGTTCT
CGTTCGACTCCATCCACGACACTGAGCGCCGCCTCCTGCCGGAGTTCTTC
GAGGGGGAGGCCGCGGCGGCGTCCGGGTGCCGGGGCCCGGGTGCGTACAA
GTACTACCGCGACACCCTGATACGGAGGTTCCGGGCACGGCCGGGTCGAC
GGCTCACGCTCACGGAGGCCAGGCGGGGACTTGTGGGCGACGTTGGCTCC
GTCCGCCGCGTCTTCGACTTCCTCGAGGAATGGGGGCTTATCAACTATGG
TGCTTTGCCGTCGGGCTCAAAGCAGGTGAAAGAGAAGAGGGAAGAGGCTG
CACCACAACCGTCATTGCCTTCTGGGGCAACAGCACCCAGGAAGCTTTGT
ACTGGTTGCCGCTCTGTGTGTGGGCTTGCTTACTACGCCTGTGATAAGGC
GGATATAAGTCTCTGTGCTAGATGCTTTGTATGTAATAACTACCGGCCGG
GTCTGACTGCTGCAAATTTCAAAAGAATCGAAATTACTGAAGATGCAAAA
TCAGATTGGACAGACAAAGAAACTCTTCACTTACTTGAGGCTGTCTTACA
TTATGGCGAGGACTGGAAAAAGGTGTCTGAGTATGTTGGTAGTCGATCAG
AAAAAGACTGCATTGCAAGATTCATCCGATTACCTTTTGGAGAACAGTTC
ATGGGACCTAAGGAGGGTAGAATGGGGTTTGAGACTGATGGAGACATTAC
TGATGAGCCTGGAGCACACGTCTCAAAACGACCACGTCTCACTCCACTGG
CAGACGCAAGCAATCCAATTATGGGTCAGGTTGCATTCTTATCAGCCATT
GTGGGTTCAGATGCGGCCTCAGCTGCTGCTCAAGCAGCTATTTCTGCACA
ATCCCATGTTGATCTAAATGACGGTGAGATTGATTCTTCAGTGAATAGCG
CCATGGAAGAAGAATCGTCTCACACAAGTGGGCTTTCATTCAATGATTTG
CTCAAAGAGGCTGCCACTATTGCACGGGCACAACTTGAGAAGGAACAGAA
CAACATAGAGCAATCTTTATCTGCTATAGTGGATGTCCAGATGAAGGAAA
TCCAAGATAAAATATGTCGTTTTGAACACAAGGAGATGCTTATGGAGAAA
GAGCGACAGCAGCTCCGCTGCCTGAGGGATTTGCTTTTCGCAGATCAACT
GGCCGTCATGCAACATCATCGCCGGCACCAAGCTGTAGCCACAGAGATAA
AACCGGATGGGAAACCAAAGCCCATTATTAATAACATAAGTTAG
>Pgl_GLEAN_10016698 PgMYB64
ATGACCGTGGAGGAGGTGAAGCTGCAGGCGAAGGCCAACGGCGGCCATGG
GGCCAAGGACCAGTTCCCCGTCGGCATGCGCGTGCTCGCCGTCGACGACG
ACCCCACCTGCCTCATGGTGCTCGAGAACCTCTTGCAGCGCTGCCAGTAC
CAGGTGACAACAACCGGGCAGGCAGCCACAGCCCTGAAGCTGTTGAGGGA
GAACAAGGACCAGTTTGACCTTGTGATCAGTGATGTCCACATGCCGGACA
TGGATGGTTTCAAGCTCCTTGAGCTTGTGGGCCTCGAGATGGACCTCCCG
GTCATTATGTTGTCTGCAAATGGGGAGACACAAACAGTCATGAAGGGTAT
CACCCATGGAGCATGTGACTACCTGCTGAAGCCAGTGCGCATTGAGCAGT
TGAGGACAATATGGCAGCATGTGGTTAGGCGGAAGAGTTCTGATGCCAAG
AACCATGGCAATGATAACGATGATTCTGGCAAGAAGTTGCAGGCGGTGAG
TGCTGAAGGTGACAATGGTTGCGTCAATCGCAACAAGAGAACTTCACGCA
AGGGTAGGGATGACAATGGTGACGATGGTGATGATTCTGATGATAGTAAT
GAGAATGGAGACTCCTCAACCCAGAAGAAGCCAAGGGTTGTGTGGTCTGT
TGAGTTGCACCGGAAGTTCGTGGCTGCTGTGAACCAGCTTGGCATTGACA
AGGCTGTACCGAAGAAAATATTGGATCTCATGAATGTTGAGAACATCACA
AGGGAGAATGTTGCAAGTCATTTGCAGAAGTACCGGCTGTATCTGAAAAG
ACTTAGTGCTGACGCGAGTCGTCAGGCTAACCTAACTGCTGCATTTGGAG
GAAGGAACCCTGCTTATGTTAACATGGGCCTCGAAGCCTTCAGGCACTAC
AACACATATGGGAGATATCGGCCAGTCCCAACCACTAACCATTCACAGTC
AAACAACCTTCTTGCAAGGATGAACTCTCCTGCATTTGGGATGCATGGTT
TGCTGCCTTCCCAGCCGCTTCAGATTGGACACACCCAGAATAATATGAGC
ACTTCCTTGGGCAATGTCGGTGGGATGAACAGTGGTAACCTGATCAGGGG
TGCTCATATGCCACTGCAGGATAGTAGCAAATGCTTTCCTACTGGTCCTT
CTGGTAACTCTTTTGCAAACATATCAAACAGCACACCATTGGTTCCAACG
AATAGCTTGCCGTTACAGTCTCTTGAGCCAAGCAACCAGCAACACCTTGG
TCGCATGCACTCTTCTTCTGCTGACCCATTTAACTCATTTGTTGGCGAGT
CGCCCCAGTTTCCAGACCTTGGAAGATGCAACACCACCTGGCCAACTGCA
GTTTCATCATCGAATATTCATGAACTTGGTCAGAAAGACAGCATGTCACA
ACCAAACCTGCGTGTGAATGGCCCCAAGCTTGAGCCTCTCTCAAGTTTTA
CAGAAGCATCCAGTCATATTCCTTTGCTGGGCAATGAAATGCGGAGCCAG
GTAGCATCACTAGCCAGTAACGGTCTTACCATGCCCTTCAATCAGGAAGC
AGTGCCATTCACATATGGAAGCAGCACCAACTCAAGAGACATGGTGAATA
ACAACCTTGTGCTTAGTAATTCAGGCATCAACTCTTCTTTGCCAAACCTT
CGCATAGACAATTCTATGGTTCCAAGGCAGACACTGGATGGTGGTAATTC
AGGTGGTGGTGTTCCCCCTTTGCAAGATGGCAGAATTGATCAGCAAGCTG
TTAATAGTCAGCTAAACTATAACAACGATCTGATGGGGACAAGTAGGCTG
CAAAGGGGACTCAGTGGTGGTCTGGATGACATTGTTGTTGACATGTTTCG
GCCGGACCGCTCAGACGATGGTGTCCCCTTCATCGACGGGGACTGGGAGC
TGGTCTAG
>Pgl_GLEAN_10027845 PgMYB65
ATGTTCCCTTCCAAGAAGGCCACTAGCGCCGCTGCCGCAGCTGCTGCCGT
GAGCTCAAATGATAGACCGATGTGCGTTCAAGGGGACTCAGGGCTCGTCC
TCACCACCGACCCCAAGCCCCGGCTCCGGTGGACGGTCGAGCTCCATGAG
CGCTTCGTCGACGCCGTCACGCAGCTCGGCGGCCCGGACAAGGCGACTCC
AAAGACTATCATGAGGGTCATGGGAGTGAAGGGGCTTACTCTTTACCACC
TCAAGAGCCACCTCCAGAAATTCAGGTTAGGAAAGCAGCCACACAAGGAG
TTCAACGATCACTCGGTTAAGGATGCTGCAGCAATGGAGATGCAACGAAA
CGCTGCATCTTCTTCAGGCATAATGGGAAGAAGCATGAATGACCGCAGCG
TCATGAATGAGGCTATGAGGATGCAAATGGAAGTCCAGAGAAGGCTACAT
GAGCAACTAGAGGTGCAAAAGCACCTCCAGATGAGGATTGAAGCCCAGGG
GAAGTACATGCAGTCCATACTGGAGAAAGCCTACCAGACCATCGCCTCCG
GCGACGTGTCGGCGTGCGCCGGCGGTTACAAATCCCTAGGCAACCATCAG
CAGGCGATCCTCGACGTCTGCTCCCTCAAGGACATTGGCCCTTCCATGGG
CTTCGCCTCCCTGCAAGACCTGCACATGTACGGCGGCGGTCACCTGGACC
TGCAGCACCAGATGGAGCGGCCAATGGAGGCCTTCTTCGCCGCCAACTGC
GACATGGGGTCGCTGGGGAAGAAGAGGCCCAGCGCTTACGCTGCCGCCGG
CAAGAGCCCCATGATGTGGGGCGACGACGAGCAGGGGAAAGGAGGCGTCG
ACCAACTCCAGATGGCGCCGCCGCCGATGATGGACGCCGGCGGCATCGAC
ATCATGGACTCCATCGCCGACGTGTACGGAGACGTGAAGCCCATGATGTC
CGGCGACTCCACGGGGAGCAAGGGTTGCTTTGAGGGCAAGCTCGAGAGGC
CGTCGCCGCGGCGGCCACACATGGGCAACGAGAGGAACATGTCCTACGGG
TAA
>Pgl_GLEAN_10020538 PgMYB66
ATGAGCACACAGAGCATTATCTCTGTGAAGCAATTCACTGGCCCTCACAG
AATGGCTCACACGTGCACTGCTCCCCAGCCTTCTGCTCATAATCTGCTCA
GTGCTGAATCAGATAGCTGTGGCTCAGCACACGATCCACGGTCATCATGG
TCTGCTGTTCAAACCTCGAGCGTCAAGTCAGAGATGGTTGGTTCGTTGAG
TCTGACAAAGATCCTTCCTTTTAACCTTGAGAAATGCAGTCCTGGCTCCA
ATCCTGATGATAGCGCTGTTTCTCGCGTATCGCAAGCCGAATTGTCGGAT
CCAGTATCATCTAGTTCTTCCACATTCTGCACAAGTATGTTCTCCTCATT
TCAGACAGACCCCGAATCGTGCCAGCGAAAAGGTGCTCTGCCTTTCCTGC
CCCATCCTCCTAAATGTGAGCAGAAGCTGCAGCAGCAGATTTCAGCTGGG
CAGTCATCCAGCTCTTCTTCACTTCTCTTTGGTGCTGACCTCAGCAGTGG
TAGTCATGATGATGCTTCACATTCAGGTGATCTCAAGGACTTTCTTAACC
TTTCTGGAGACGTTTCAGAAGGTACTTTCCATGGAGAAAGCAGTGCCATG
GCTTTCAGTGAGCAGGTGGAGTTTCAGTTCTTGTCTGAACAACTCGGAAT
CGCCATGACCAACAACGAAGAGAGCCCTCGGTTAGATGACATATACGACA
GACCACTGCAAACCTCTTCTTGTCCAGTACCATCTTACTCTGACCAAGAA
GGCGTACCGATTGCAGTAACTCCTGTTAAACTTCAGCTGAGTTCATCTCA
AGCTGAAGCACGTAACAAACCAAGATTGAGATGGACACTGGAGCTCCATG
AGCGCTTTGTGGAGGCAGTCAACAAGCTTGGAGGGTCAGAAAAGGCAACT
CCAAAAGGTGTGCTGAAGCTTATGAAGGTAGAAGGCTTGACCATCTATCA
TGTGAAGAGCCATTTGCAGAAATATCGTTTTGCCAAGTATCTTCCAGAGA
CAAAAGAAGAAAAGAAGTCCTCTTCGGAAGGCAAGAAATCTCAATCAGTA
TTACCAGGAAATGATGCTGGCAAAAAGAAGAGTTTACATATAGCAGAAGC
TCTTCGGATGCAAATGGAGGTCCAGAAACAACTTCATGAACAATTAGAGG
TGCAAAGGAAACTACAGCTGCGCATAGAAGAACATGCAAGACATTTGCAG
AAGATATTAGAAGAACAACAAAAGGCAAGGAACTCCTTATCAACCACGAG
AAATTCAGCACAAGAGGAACAGCCAGAATCCACAGAGAAAGAGGAAACTG
GGATGAAAGTGAAAACCTCTTCGGAGCTACCGTCATGGAGCAAAATTTCA
GATACTGACGTTGAATGCAACTCACAAGTCACAAGTGGACAACAAAAGTT
CAAAGGCTCAGGATGA
>Pgl_GLEAN_10018078 PgMYB67
ATGGGGTGCCGGTCCTGCGACAAGCCCAAGATGAACTACAGGAAGGGGCT
GTGGTCACCTGAGGAGGACCAGAGGCTGAGGGATTACATCCTCAAGCATG
GCCTTGGCTGCTGGAGTGCTGTCCCTGCAAAGGCTGGTCTCCAGAGAAAC
GGCAAGAGCTGCCGCCTGCGCTGGATCAACTACTTGCGGCCCGGATTGAA
GCGTGGAATGTTCTCTCAGGAGGAGGAAGACGTCGTCATCAACCTTCAAG
CCAAGCTGGGCAACAAGTGGTCTCAGATTGCGATGCATCTTCCCGGGAGG
ACCGACAACGAGGTGAAGAACTACTGGAACTCGTACCTGAAGAAGAGGGT
GATGCAGGCCCAGGGCGGCTCCAACCCAAAGAGCCCACCCGAGCTCACCT
CCATGAGCACCACCGAGCCAGCCATGTCCATGACCCACCACCATCAGCAC
CACGTCAAGAACAGCAGTGGCGGCGGCGGCGGCGGCGGCAGCAGCACCAC
CACGTCGCACGACCAGGACGCCAACATCATCAGCAGCAGCAATGGCGTCC
TATCAGCCCCTATGCTGGCGGCCCAGCAGCAGCCGTTCGATCACCAGGCC
CAGCAGCAGCAGCAGCAGCAGCCCAAGAACTTCGTCTTCTCCGACTGGGC
GGTGCCGGCGCCGGAGAGCTACTCGGTGTCCGCGCACTGCTGGCCCGCCT
CCACGGCGAGCTCGGGCAACGTCACGCCGTCGCACGGCGGCGCCTTCGGC
NNNNNNNNNNNNNNNNNNNNNNNNNNNNNNNNNNNNNNNNNNNNNNNNNN
NNNNNNNNNNNNNNNNNNCGGGTTCAGCTCGACGAACGATGATCTCCTCT
TCTGA
>Pgl_GLEAN_10031135 PgMYB68
ATGAACCAGCTTTACAATGGAAGAGTTTCTCATTGTCTTTCATCACCTAT
AACAGTAGTACCAGCACTTTCAGAGGTATCGTTTCCAAGTTTTCCAGAAC
AGAGATCATCTTATGGTGAAAGGGAACTGCCTATCAATTCTGTCACCTCA
TTTGGTACTTCTATGGCTGCACATAACGTGATGCCAACATGTATGTTAGC
CTCCAACTTCACCTCAGACCTTCATGCCAACAATAAATCACCAGATGGGA
AGTTTTGTTCTGGCCCATATGTTAAGGAGCCATCTGATCTTGATACTCAA
TTGCCGTCAGCACACTCATCATTTCTGGGTAATTCAAGGTCTTTGATGAT
GGATTTTCCAGAAGTATCTGGAAATATATGTTCGGACAAAGAAAAACTCC
TAGGTTTATTTGATTGTTCAGCAAGTGATAGTTTTTCGGATCTACAAAAC
GTGACTGCCTTTGGACAACAAGTTCAAGATACCATTACAATTGCTCCTAA
CACTCATGCTGCACTGCAAAATGAGTGGTTCTCATCTGGGAGCTCCATGC
ATGTTCCCGAAAATATAGTTGATCCAAGAAGTGTAATACCAGACACGCCT
AGAAGTTTATCATGCTGCTATACTCAGAGAAGTATACCAAACCCTTTCAG
CTGTGATGAATTTTGCGCTGACAACCTCCGTTCAAATAACGCTTCAAAGT
CAAGGATGCGCTGGACACCTGAGCTTCATGAGCGTTTTGTTGATGCTGTT
AACAAGCTGGGTGGGAGTGAAAAAGCAACTCCAAAAGCAATCCAGAAGGT
TATGAAGGTCGAAGGATTAACTATATACCATGTAAAAAGCCATCTGCAGG
TATTTATTTGCGTGTCTGGAAGGAGCAGCAGCCAAACAGATGAAGTGCCC
ACTCTGCAGCTGAAAGGCACAGGGAAGTTTGAAGGATTGATGGCGCAGAT
TGGCTTGCAGAAACAACTTCATGAACAACTTGAGATCCAAAGAAAGCTGC
AGTTGCAAGTTGAGGAGCAGAGCAAGTACCTTGAAATGATAATTGCGAAG
CAAAACGAAAGCCTTAAAAAGCTTGGGGCGTTCCCAGGGTTTCGAGATGG
ATTCCTTCATGTTTTGGATGGCAAAGAAAGAACGTGA
>Pgl_GLEAN_10002978 PgMYB69
ATGGGGAGGGCGCCGTGCTGCGACAAGGCGAGCGTGAAGAAGGGGCCCTG
GTCGCCGGAGGAGGACGCCAAGCTCAAGGCCTACATCGACGAGAACGGCA
CCGGCGGCAACTGGATCGCGCTGCCGCAGAAGATTGGGCTGAAGAGATGC
GGGAAAAGCTGCAGGCTGAGATGGCTCAACTATCTGAGGCCAAACATTAA
GCATGGTGACTTCACAGAAGAAGAGGAGCATATCATTTGCAGCCTCTACA
TCAGCATTGGAAGCAGGTGGTCCATCATTGCAGCCCAGCTGCCGGGGCGG
ACGGACAACGACATCAAGAACTACTGGAACACCAAGCTGAAGAAGAAGCT
CCTCGGCAAGCGCGCGCCGTCCCGCCGCGCGAGGGCGAACCACCAAGACC
CCTACCTCGCCGCGGCGGGCGGCAACATCATTACAGAATTGGTCGTCGTC
TTCTTCTCCTCTCCACACCGGACACTTCTTGCTTGCGCCACCCACATCTC
CCGGAAGGAGCTCACCTACACTGCCGACGAGCGGTCCAAGGCGGAACTCC
CCCACACCGTCCGCGCCTCGCAGGATGGTTATTGGAGCGGTGTGAGGGAG
AGGGAGCTGCGCGGCGCACCGGCGAAGGAAGGAGGGAGGCCGCGCGACGC
GTCAATGAAGGGAGGACGGGCCTGCCACGGCGCAGCAGCGAAAGGAGGGG
CTGGCCCCGAGGAAGACGAGGAGGACCGCCCCAGCCACGAGGAAGACCAG
GGTGCAGGCCGCGAAGAAGATGAGGAGGGGGTGGCACGACACAGGCATTC
AAGCTCACCGGAGATGGGGAAGGGAGGCGGGACGCGACGGGGCCAAGATC
GTCGGAGGTGCGGAAGGGAGGTGCGGTGCGAGCAAACTCGCCAGAGATGG
GGAAGGAAGGTGCGACCAAGCTCATCGGAGGTGCGGAAGGGAGGTGCGGC
GTGA
>Pgl_GLEAN_10010695 PgMYB70
ATGTTCGAGGGGATGGAGAGGGCGTACGGCGGAGCGGCGGCGATGGGCGG
GGTGGTGCTTTCGCGGGACCCCAAGCCGCGGCTGCGGTGGACGCCTGACC
TGCACGAGCGCTTCGTCGAGGCCGTCACCAAGCTCGGCGGGCCTGACAAA
GCGACGCCCAAGTCGGTGCTCAGGCTGATGGGGATGAAAGGGCTCACCTT
GTACCACCTCAAGAGTCATCTCCAGAAATACAGGCTTGGAAAGCAGAGCA
AAAAAGATACAGGCTTGGAAGCCAGCAGAGGGGCATTCGCCGCACAGGGC
ATCAATTTCTCCGCTCCAGTGCCTCCTACCATTCCATCTAGTGCCGGCAA
CAATACGGGAGAAACGCCGCTTGCCGATGCCCTGAAGTATCAAATTGAAG
TCCAGAGGAAACTCCACGAGCAGCTTGAGGTGCAGAAAAAGCTGCAAATG
CGAATAGAGGCGCAAGGCAAATACTTGCAAACAATACTAGAGAAGGCCCA
GAACAACCTGTCCTACGATGCATCAGGAGCTGCAAACCTAGAGGCGACCA
GGTCGCAGCTCACAGATTTCAACCTCGCGCTCTCGGGTTTCATGGACAAC
GTGTCGCAAGTGTGCGAGCAGAACAATGGCGACCTGGCGAAAGCCATATC
CGAGGACAACCTCAGAGCGAGCAATCTAGGCTTCCAGCTGTACCATGGCG
TTCACGACGGCGAGGATGGCAAGTGCACTCCGGATGAAGGATTGCTGCTG
CTGGATCTTAACATCAGAGGAGGCTATGATCACCGGTCTGCGGCGGATTT
GAAGATGAATCAGTACATGAGGTGA
>Pgl_GLEAN_10031638 PgMYB71
ATGGACTTGGAGCTGCAGCTGCTATGGACAGGACCCGGCAACGAGAAACA
TTTGGACCAATGCATAGGTGTATTTGATGATCATTGCAGTCAACAGGTGG
TCATGTTCAACCCTAATTTTGGTTTGCAAGAGCCTTCCGCGAGTGGAGGG
AGAAAACATGGTAGGAAAAATAATGATCATTGGACACAGGATGAAGTTAG
ACTACTTGTGCACGGTGTATCCGAGTATGGAGTTGGAAAGTGGAAAGATT
TGAAGACAAAATATTTCTTTGCATCAATTCGAACACCAGCTCACTTGAAG
GATAAGTGGAAGAACTTAGTGAAAGCGTGCAAGAAGGAAAGTGGAAGAAT
GTTGCTACCCCTTGAAGAAGCACTCATCGAACGTATCACCGAGATAGATG
ATGACAACCCTTACCCAAAGCAAAGCAACAACATCCACCGTCTAGCGCCG
ACGACCACCTCTCCAGACCTCCTTTCGGAGTTGCCCCGTGCGGGGCGATG
GTCTGTGGTGAAGGCCAGAAAAAATAGAATGGCACAGCATGCATATCATG
CTCTCAGCTCCAATGGCAGCAGCGCCTCTCCCGGCCGCCCCCCTGCACCG
CGCAACAAGCAGGTCGCCCTGATTAGCACGCGCGCGCTGAGCTGA
>Pgl_GLEAN_10012406 PgMYB72
ATGGGAAGGTCTCCTTGCTGTGATGAGAATGGCCTCAAGAAGGGCCCCTG
GACCCCTGAAGAAGACCAGAAGCTCATGGAGTACATCCAGAAGCACGGCC
ACGGGAGCTGGAGAGCACTGCCGAAGCTTGCTGGGCTCAACAGGTGTGGC
AAGAGCTGCAGGCTGAGATGGACCAACTACCTCAGGCCCGACATCAAGAG
AGGGAAGTTCACCCAAGAAGAAGAGCAAACCATCCTCCGGCTCCACTCCG
TCCTTGGCAACAAGTGGTCAGCCATTGCGAAGCACCTGCCTGGACGGACC
GACAACGAGATCAAGAATTTCTGGAACACACACCTGAAGAAGAAGCTGAT
CCAGATGGGCTTCGACCCCATGACGCACAGGCCAAGGACCGACTTCTTTG
CTGCGCTGCCTCAACTCATCGCGTTGGCCAACCTCCGCCAGCTTGTGGAG
CAGCGTCCATGGGACGACCACGCCGCCAGGCTGCAGGTTGAGGCGGTCCA
GGCTGCAAAGCTCCAGTGCCTCCAGAACCTGATCCAGTCTGCAGCATCCA
TTGCCACCAGTCCAAGTTCCAGCAGCATCAACACCATCCCAGACCTGGAG
CAAATTGGCCTCCTGAGTCCTCCGCAAATGTCTTCCTTGTCTTCGTTGCC
TTCTCCGAGTTTTATGGACAGTATCAGTGGCCAAGACATAGTAGCTGGAC
AAGTGCCTGACATACAAATTCCTAGCTCTTTCTTTGAGCAGCCCACCAGC
AACGATGCCAACCAGAACTCAGACTTCACTCCAAAGAGTAGCGTTGAGGG
GGAGAATGGAACCCCTAAAACGCTGCTGCTGTCAGAAAACTCCCTTCCGC
CGCTCACCGACTTCCCCATTTCCAACTTCGCCGATGCTTGCAGCGTCTCA
AGCTGTGATGGTAGCAGCATTCAATTCCCGAGCTGGCCTGAGTTGTTTGA
TGAACAGTTCTTGAGCGAGTTTGTATGA
>Pgl_GLEAN_10012225 PgMYB73
ATGGGCAGGCAGCCGTGCTGCGACAAGGTCGGTCTCAAGAAGGGGCCATG
GACCGCGGAGGAGGACCAGAAGCTGGTCGCCTTCCTCCTCTCCCACGGCC
ATTGCTGCTGGCGGCTCGTCCCCAAGCTCGCAGGGCTGCTGAGGTGCGGG
AAGAGCTGCCGGCTGCGGTGGACCAACTACCTGCGGCCGGACCTCAAGCG
GGGCCTCCTCTCGGAGGAGGAGGAGGCGCTGGTCATCGACCTCCACGCGG
AGCTCGGCAACCGGTGGTCCAAGATCGCGGCGCGGCTCCCCGGGAGGACG
GACAACGAGATCAAGAACCACTGGAACACACACATCAAGAAGAAGCTCAA
GAGGATGGGCATCGACCCCGTCACCCACCGCCCGCTCTCTCCGGCGCCGC
AGGCGAGCGATCCCCCGCACGTGGATGGCATCATGGACATGGACTGGGCA
GGCATCCTGTCCGGTTGCGGCGACGATGGCGCCGGCGTAGACGTCGACCT
GTTCGACCATTACCCCGGAGATGGATTCGACCAACAAGTCTGGATGTGA
>Pgl_GLEAN_10008203 PgMYB74
ATGGGGCGAGGTCGAGCGCCGTGCTGCGCCAAGGTGGGGCTCAACAGGGG
CTCGTGGACGCCGCAGGAGGACATGCGCCTCATGGCCTACATCCAGAAGC
ACGGCCACGCCAACTGGCGAGCGCTGCCCAAGCAAGCAGGTTTGCTGCGG
TGCGGGAAGAGCTGCCGGCTGCGGTGGATCAACTACCTGCGGCCGGACCT
GAAGCGCGGCAACTTCACCGTCGAGGAGGAGGAGACCATCATAAGGCTGC
ACGGCATGCTCGGGAACAAGTGGTCCAAGATCGCGGCGTGCCTGCCGGGG
AGGACGGACAACGAGATCAAGAACGTGTGGAACACGCACCTGAAGAAGAA
GGCGGCGCTGCGGGAGCAGCAGGAGGCTTGCGCGGCCAAGAACGGCGGAG
CAGCGAGCGGCGACGACGCCAGCACGCCGGTCACCGCTTCGTCCTCAGCG
TCCTCCTCGACGACGACCAACAACGACAGCTCCGGGGGCAGCGACTCCGG
TGACCAGTGCGGCACGAGCAAGGAGCCCGACGCGGTCGACGTGTCCGACC
TCCTGCTAGAGAACATCGACGTCTCCGACATGCTGGTGGACGCACCCATG
GCGTCAGCGGCGGCGGCGCAGCCAATGCTGTCCTCGTCATGCTCCTCGTC
GTCCCTGACGACGACGTGCATCGGCGGCGGCGTGGATGAGCTGATCGAGC
TGCCGGTGATCGACATCGAGCTGGATATCTGGAGCATCATCGACGGCGAG
AGCGCCGACGCCTCAGGCGGCGTGCGCCACGGCGATGCAACAGCCCCATG
TACGGGCGGCGCCATCAGCTTAACAACAGGGGAGGAGGAGGCGGCGAACG
GGTGGTTGGAGAATTTGGCGAAGGAGCTAGGCCTGTGGGGCCCAGTGGAG
GATCTTCAGGCCCAATCTGACCTACTGGACCATACGGGCTTGGACCCACT
CGTCGACTCTGCGGGGGACCCAGTCTCCACCTACTTCCAGACCGGGCCTG
CCAATGCTGAAACTGAATTCCTCGATGTGGAGCTCCAACCATCATCATCT
GCTGTTCCGCTATGA
>Pgl_GLEAN_10027659 PgMYB75
ATGGCGACCGACGAGATCGCCGTCGCCGTTCGCGCCGGCGGCGAAGCCGA
AACCGCCGTGGATCATAGCAAGGATCCCCTCGATCCCGGAGACATGGATT
TGTCCGGGGAGGAGCACGTGCCCAAGGCGCGGAAGCCGTACACGATCACA
AAGCAGCGGGAGAAGTGGACGGAGGACGAGCACAAGCGCTTCCTGGAAGC
CCTGCAGCTTCACGGCCGCGCATGGCGCCGCATCCAAGAGCATATCGGCA
CCAAGACCGCCGTGCAAATCCGGAGCCACGCGCAGAAGTTCTTCACCAAG
GTGGTCAGAGAATCGTCGGCGACGGGGAGCAACACGGCAGGGGGCGCCGC
GCCGGTGATCCAGATCCCGCCGCCGCGGCCCAAGAGGAAACCAGCACACC
CGTACCCGCGCAAGGTGGACGGCGCGGCCAAGAAGAACGTTCCGGTGCTA
AAGCACCTGGAGCGTCCGTCCCTGCGGACGCAGTCCCTCCGCGACCAGGA
CGACGGGTCACCGACGTCGGTGCTGACCACCGCGCGGACGGTTTTACGAG
CGGATGCGCTGGGCAGCGTGTTCGCCAACAGCTCGAGCGGCAGCAGGTCA
CCGGCCCCGTCAGCCACCGCTTCGGACGAGCATGGCGACGGCGGCGGCTC
GCCGGCCTCGTCCGTGGACAGAGAGGACGGGTCCGTGTCGCCAAGCGTCG
CAACAGCTGAGCTGGCCGCGAGAACAGCAGATACCAAGGTGTTCGGCGAT
AGAAAAGTTTCCTGCACAGGAACAGAGGATTCATCAGTCTTTAAACTGTT
CGGAAACAAAGTTACGGTGAAGGATCCCCTTGAACACCTGACAACGGATG
CTTCACCCGCGAGTGTTGCCCAGGCAACCAGAAACCCAACCCCTTTCGGT
GCCGCAGAAGGGAGCTCGTGGAATCCATGGCCGACCGGCGTGCAGGTGCA
GCAGCTCATGTACTTCGTCCCCCAGCCCGACGGTTTCGCCGCGCAGTCCG
CGGTGCCGTGGCTCGCCTACAACGGGACCCTGCCGTGCGCGTTGTTCTAC
CCACAGGCGGCGGTGGCGCCTTCTGCTCAGCAGCACCGCAGCAGCCAACC
TTCAGAGCCTCTGGATCACAAGCGCGTGCAGAGGGAAGGGTCGCTGACGG
GCTCGAACACCGCCTCCAGCGGCGTGCCGGCTGCGTCGGCGGCGCAGAAC
TCGGACGCCGCGGAGTCCCACGGTCCCGGTCAAGAAACCACCAGCGACGG
CGACGCGGCGCCGGCTGCTGCTGCCGTTGCCGTACAGCGTCTGACGAAGT
GGCCGAGCTCGGCTTCCTTCAGCCGGAGCGGGTTCGTGCCCTACAAGCGG
TGCGCGGCGGAGAGCGAGGCGCCGCGGCCTATGGCTGCCGGAGAGGAGGC
CGACGGCGAGCTGACGAGGCTGTGCTTGTAA
>Pgl_GLEAN_10027682 PgMYB76
ATGGTCTCCGCCAGCACGCCGCCGCCGACGCAGCCGCAGTCCGACGCGGC
CGGGTCGGGGGAGGACGCCAGCAAGAAGGTGCGGAAGCCGTACACCATCA
CCAAGTCGAGGGAGAGCTGGACGGAGCAGGAGCACGACAAGTTCCTCGAG
GCGCTGCAGCTGTTTGACCGTGACTGGAAGAAGATAGAGGCTTTTGTTGG
CTCCAAGACTGTCATACAGATAAGGAGCCATGCACAGAAATATTTTTTGA
AGGTTCAGAAAAATGGAACCAGCGAACATGTCCCACCTCCACGACCAAAG
CGAAAAGCAGCTCATCCATATCCTCAGAAGGCCTCCAAGAATGAACCAAA
CTATGGACTCAAGACAGATTCATCTTCCATCCATAGGAACTCTGGCATGA
ATGCAACTGTTTCTTCATGGGCTGTTAGTTCCATTCCACCAGTTGTCGCC
TCATCGATGGTGAAAGTTATGCCGGATTTTGCGCAAGTGTACAGCTTCTT
AGGTAGTGTTTTTGATCCAAGCACAAGTGGTCATCTGCAGAAACTTAAGG
AGATGAATCCAATTGATGTTGAAACGGCATTATTGTTGATGAGGAATCTC
TCCATCAATTTGACCAGTCCTGATTTTGAAGATCAAAGGAAGCTGCTGTC
CTCATATAGCACTTCTGGTGGACTTGAGCTAGGGAGTTCCAGGAGTTCAG
CTCTAGCAACGAGTGCTCCTTTCATGTAA
>Pgl_GLEAN_10029306 PgMYB77
ATGGGGAGGGCGCCGTGCTGCGACAGGACGAAGGGGCTCAAGAAGGGGCC
CTGGACGCCGGAGGAGGACAAGCTCCTCGTCGACTACATCCAGGCCAACG
GCCACGGCAGCTGGCGCATGCTCCCCAAGCTCGCAGGGCTGAACCGCTGC
GGCAAGAGCTGCCGGCTGCGGTGGACCAACTACCTTCGGCCGGACATCAA
GCGCGGGCCCTTCAGCCCGGAGGAGCAGAAGTCCATCGTCCAGCTCCACG
CCATCGTCGGCAACAACTCGGACATCGGGGACTCCTTCCGCCGAAAGACG
GCGGCCACGCCGGCGCCCGTCAGGAGGAAGGACGACGTGGTGATGATCAA
GAAGGAGGCGCTGGCGCTGCCTGCGCCCGGCGAGGACCCCTCGGCGGCGT
CCAACGAGATGGAGGTGGCGGAGGCGCTGGAGGAGTACCAGATGTTCCTG
GACTTCGCCGGCGAGGAGCTGGGGCTATTCCACGGCCGGTACGGTGGGTT
CTCGCTGTTCCCGCCGCTCGAGGTGCTAGAGGCGTCCCTGGACACGGCGT
TCTAG
>Pgl_GLEAN_10029303 PgMYB78
ATGGGGTGCAAGGCGTGCGACAAGCCCAAGCCCAACTACCGCAAGGGCCT
GTGGTCGCCGGAGGAGGACGAGAAGCTCCGCGACTACATCGTCCGCTACG
GCCACGGATGCTGGAGCGCGCTCCCCGCCAAAGCCGGGCTCCACCGGAAC
GGCAAGAGCTGCAGGCTGCGGTGGATCAACTACCTGCGTCCGGGGCTGAA
GCACGGCATGTTCTCGCCGGAGGAGGAGGAGACGGTGATGAGCCTCCACG
CCACGCTCGGCAACAAGTGGTCGAGGATCGCACGGCACCTGCCTGGCAGG
ACCGACAACGAGGTGAAGAACTACTGGAACTCGTACCTCAAGAAGCGGGT
GGAGGGCAAGGAGGCACCCAGCAGCAGCACGCCCGCGACGACCACCAGCT
CCGGCGCCGACTCGGAGGACTCACAGTCGCACGGAGGCGCCAGCTGCTGG
GAGTTCCAGGAGCACTTCGACGGCATCGATCAGATCAGCACCACGGCCTT
TTGCGACCTGCTCTCCATGAGCGACTACTTCGGCCTCAACTAA
>Pgl_GLEAN_10008396 PgMYB79
ATGGGTCTGAAGAGGGGGCCATGGACGCCGGAGGAGGACAGGACCCTGGT
GGCGCACATCGAGCGCCACGGCCACAGCAACTGGCGCGCGCTGCCCAAGC
AGGCGGGTCTGCTGCGCTGCGGCAAGAGCTGCCGCCTCCGGTGGATCAAC
TACCTCCGCCCGGACATCAAGCGCGGCAACTTCACCCGCGAGGAGGAGGA
CGCCATCATCCACCTCCACACCGTGCTCGGCAACAGATGGTCGGCAATTG
CTGCCAGGCTGCCGGGGAGGACGGACAACGAGATCAAGAACGTCTGGCAC
ACGCACCTCAAGAAGCGCCTCGAGGAGCCCAAGCCAGCAACCCAGCAGGC
GCCCAGGCGCAAGCAGCCCAAGAAGCAGCAGCAGCAGCAGCAGCCACCTG
CGGAGATCGTGATGCTGGACGGCCCGACCGCGCCGGTGTCTTCGCCGGAG
CAGTCGTCGCTCTCCACGTCCACCACCTCTAGCACCGACTACTCAGCGGC
CTCGTCGGTGGAGAACAACGCGGACAGCAGCTTCACCTCGGAGGAGGACT
ACCAGATCGAGGACAGCTTCTGGTCTGAGACGCTGGCGATGACGGTGGAC
GACGGCTCCGATTCTTTCGGGATGGAAATGAGGGAGGGGGACGCGTGCGC
CGCGACGGCGCCGTCGGCCAACGACGACATGGACTTCTGGCTCAAACTGT
TCATGCAGGCCAGCGACATGCAGAATAATCTGCCCCAGATCTAG
ATGGAAGGGCAGTTTGGATGGGGGAGGGAGGAGGGAGGGTGGAGGAAGGG
GCCATGGACGGCGCAGGAGGACAAGCTGCTGGTCGAGTACGTCAGGTACC
ATGGCGAAGGGAGGTGGAATTCCGTCGCCAAACTGACCGGTCTGAAGCGA
AGTGGCAAGAGCTGCAGGCTCCGGTGGGTGAACTACCTGAGGCCTGACCT
CAAGAGAGGCAAGATCACGCCTCAGGAGGAGAGCGTCATACTCGAGCTCC
ACGCCCTCTGGGGAAACAGATGGTCGACGATCGCGCGCAGCCTGCCGGGG
CGGACGGACAACGAGATCAAGAACTACTGGCGGACGCACTTCAAGAAGGG
CAAGCCGTCCAAGAACATCGAGCGCGCGCGGGCGCGGTTCCTCAAGCAGC
GCCGCGAGATGCAGAGCCAGCTGCTGCTGCAGCAGCAGCAGGGGCAGTAC
GACGACCAGCAGCAGAGGCAGGTCGGCCACGACCACGACCACGACGACGA
AGCCGTCGTCGGGGAGACGGCGTCGTCGCCGGCCGTCTCGCTGGCGACGC
AGCAGCACGAGGAGGACCTGCGGATGCTGCTGGAGCAGGACATGGACGAC
CTGCTGTTCCAGTTCTGCCCCATGATGGCCTCCTGCACCTCCTCCTCCTG
CGGCCTCCTCCCCGTCGCCACCACCGCCACCGCCAGCGCGTCGGCGAGCG
ACGAGGGGTCCAGCGGGGATTACCAGCTCGACGGCGGCGCCGCCACGTGG
GGTTGGGGCGGCAGCCTGTGGAACCTCGACGACGTGGTGGATGACGTCGT
CGTCGACGGCGGCTGGGACTGGGACACCAGCAGCTACCCTTTGCTGCAGG
ATCAAGGGCTCGCTTTCTACTAG
>Pgl_GLEAN_10027268 PgMYB80
ATGGAAGGGCAGTTTGGATGGGGGAGGGAGGAGGGAGGGTGGAGGAAGGG
GCCATGGACGGCGCAGGAGGACAAGCTGCTGGTCGAGTACGTCAGGTACC
ATGGCGAAGGGAGGTGGAATTCCGTCGCCAAACTGACCGGTCTGAAGCGA
AGTGGCAAGAGCTGCAGGCTCCGGTGGGTGAACTACCTGAGGCCTGACCT
CAAGAGAGGCAAGATCACGCCTCAGGAGGAGAGCGTCATACTCGAGCTCC
ACGCCCTCTGGGGAAACAGATGGTCGACGATCGCGCGCAGCCTGCCGGGG
CGGACGGACAACGAGATCAAGAACTACTGGCGGACGCACTTCAAGAAGGG
CAAGCCGTCCAAGAACATCGAGCGCGCGCGGGCGCGGTTCCTCAAGCAGC
GCCGCGAGATGCAGAGCCAGCTGCTGCTGCAGCAGCAGCAGGGGCAGTAC
GACGACCAGCAGCAGAGGCAGGTCGGCCACGACCACGACCACGACGACGA
AGCCGTCGTCGGGGAGACGGCGTCGTCGCCGGCCGTCTCGCTGGCGACGC
AGCAGCACGAGGAGGACCTGCGGATGCTGCTGGAGCAGGACATGGACGAC
CTGCTGTTCCAGTTCTGCCCCATGATGGCCTCCTGCACCTCCTCCTCCTG
CGGCCTCCTCCCCGTCGCCACCACCGCCACCGCCAGCGCGTCGGCGAGCG
ACGAGGGGTCCAGCGGGGATTACCAGCTCGACGGCGGCGCCGCCACGTGG
GGTTGGGGCGGCAGCCTGTGGAACCTCGACGACGTGGTGGATGACGTCGT
CGTCGACGGCGGCTGGGACTGGGACACCAGCAGCTACCCTTTGCTGCAGG
ATCAAGGGCTCGCTTTCTACTAG
>Pgl_GLEAN_10024409 PgMYB81
ATGGGGCGGTCGCCGTGCTGCGAGAAGGAGGCCGGGCTGAAGAAGGGCCC
GTGGACGCCGGAGGAGGACCAGAAGCTGCTCACCTTCATCGAGCAGCACG
GCCACGGCTGCTGGCGCTCGCTGCCGGCCAAGGCTGGGCTGCGGCGGTGC
GGCAAGAGCTGCCGGCTCCGGTGGACCAACTACCTCCGGCCGGACATCAA
GCGGGGCAAGTTCACGCTCCAGGAGGAGCAGACCATCATCCAGCTCCACG
CGCTGCTCGGCAACAGGTGGTCGGCGATCGCGACGCACCTGCCCAAGCGC
ACGGACAACGAGATCAAGAACTACTGGAACACGCACCTCAAGAAGCGCCT
CGCCAAGATGGGCATCGACCCCGTCACGCACAAGCCCCGCGCCGACGCGC
CCGGAGTCGCCGCGCGCGCGCACGGCCTCCTGACGCCGCGCTCGTACGGG
GAGGCGTTCGGGGAGCACGCCGCCGCGCAGGGATTCCTTGCCGGCGTTCT
TCTCGACTGTTCTGCCGCCGGCGAGGAGCAGACGAGGTTCGCGGCCGCGT
CGACGACGGACGCCAGCGTCGGCGACCTGCAGCAGGAGGAGGAGGAGGAG
GACAAGGGCTACTGGAGCAGCATCCTGAATATGGTCAACTCGTCCATGTC
GTCGTCTTCCTCTTCCGTGACTTCGGACGCTGTCACGGACCCGGCGATGT
ACTTTCCGGCGGCGGCAGAGTTCTGA
>Pgl_GLEAN_10030848 PgMYB82
ATGGAAGAGATTGGGCCTGTTTCTGACCTGGATTTCGACTTCACGGTCGA
TGACATAAACTTCGAGGACTTCTTCCTCAGGCTAGAAGACGGAGATGCGC
TACCGGACCTTGAGGTCGACCCTGCTGAGATCTTCACCGACTTTGAGGCG
ATCGCCACTGGCAGTGATGGTGTCATGGACCAGGAGGTGCCCAGTGTCCA
GCCCTTAACAGATGCAGTTCACTCATTAGATGCACTAGATCCGTGTAGTG
TTGTTCTTGGCGAGGACAATACGACGCGTGCGGATGTGGAAGAAGGGAAA
GGAGAGTGCAACCATGCTGAGGAGGTGGTACAAGGGAATGGTGTCTTTGG
GGACGGCGGAGGTACCGTCTTTCCTGAGGAGAAGTCGCTGTCTTCGACGA
CATCGTCATCACAGGAGGCTGAGAGCCAGCACAAGTCGTCCAGCAAGTAT
TTGCAGGGAAAGAAGAAATCGAAGGTGGATTGGACACCGGAGCTTCACCG
GAGATTTGTTCAAGCGGTAGAGCAGCTGGGCATCGATAAGGCGGTGCCGT
CCAGAATACTCGAGATCATGGGGATCGATTCCCTCACGCGGCATAATATA
GCAAGTCACTTGCAGAAGTACCGGTCTCACAGAAAGCATATGCATGCTAG
AAAGGCGGAGGCAGCGAGCTGGACCCAGCGGCCGCAGATGTATGCTGCAG
GTGGAACCTCCACCGCCGTGAAGAGATCAGATTCCAACACATTGACCGTG
CCAACCATCGGTTTCTTTCCACCACCGCCGCCTCCTCCTCCGCACTACGG
AAGGCCGTTGCACGTCTGGGGCCACCCTACCCAAGGGGTAGAGTTACCCC
GCGCGCAAATGTGGCCACGACACCTCATCTCTGGCGCCCCAACCCCAGCG
TGGGCCCCTCCTCCGCCATCTCACCCGGCGTTCTGGCACCACCCTTACAT
GAGGGGGCCTGGGCATATCCCAATGCCAATGCCAGCAGCGCGGTTTCCTA
CTCCACCGGTGAGCGGTGTTTTGCCTTGTCCACCTCCGATGTACAGATCT
CTCATTCCTCCCGCACTAGCAAACAAGAGTCAACAAGACGCACATCTCCA
GCTACAGACGCAGCCATCAAGTGAGAGCATAGATGCAGCGATAGGTGATG
TCTTATCGAAACCATGGCTACCACTGCCCCTTGGCCTCAAGCCACCTTCA
GTAGACAGTGTCATGGACGAGTTGCAGAGGCAAGGTGTACAAGATGTACC
GCCAGCTTGTGGATGA
>Pgl_GLEAN_10033508 PgMYB83
ATGGGAGAAGAGAAACAGAAGGTTGTGATGGAGATCGTCCTGGACGACGA
CGAGAAGGGATCTTCGGAGAACTCTGTACCACCTGCAGTTCTGGACCTCA
ACGAGGGCTTCGGCGAAGGGAGCGATGGATGGGTAGTAGTCAGCGAGGAT
GACGATGAGGAGGAGGACGACGACGACTTTGAAGGCGGTAGCACGAGCGA
AGTCGCAGGAGAGGGCAGGAGCTCAAGCAACAGCAGCACCACCAACCACA
ATTCCAGGAGCAACAAGGATCATGACATGAACAGTAGAAGTAAGGGCGAA
GGCAGCGGCGAGAGGGCGCCGGCGGTGAGGCAGTACAACCGGTCCAAGCT
CCCCCGGCTCCGGTGGACGCCGGACCTCCACATGGCGTTTGTCCACGCCG
TGGAGAGGCTGGGCGGGCAGGAGAGAGCAACGCCAAAGCTGGTGCTTCAG
ATGATGAACGTGAGGGGGCTCAGCATTGCTCATGTAAAAAGTCACTTGCA
GATGTACAGAAGCAAGAAATTAGACCATGAGTCTGGACACGAGAGAGCAG
GCATCTCCTCGGGTTCTCATCTCGATCCCCTCTCTCCATTCTTGTTAGTT
TAA
>Pgl_GLEAN_10003205 PgMYB84
ATGGGGGGGGGGGGTGGGGGCGGGCAAAGGTGGCAAAAGGTTCTAAATCC
TGAATTGGTCAAAGGGCCATGGTCGAAAGAAGAAGATGAAATCATTGTTC
AGATGGTAAACAAATATGGGCCAAAGAAATGGTCAACCATTGCTCAAGCT
TTGCCTGGACGCATAGGAAAGCAATGCCGGGAACGATGGCACAATCATCT
TAACCCAGCCATAAACAAGGAGGCATGGACTCAAGAGGAGGAGATTACTC
TCATTCATGCTCATCGGATGTATGGAAACAAATGGGCTGAACTGACAAAA
TTTCTTCCTGGAAGGACGGATAACGCAATTAAAAATCACTGGAACAGTTC
GGTAAAGAAAAAAATTGATTCATACGTATCTTCTGGCTTGCTTTCTCAAG
TCCCATGCCTCCCTCTGATTGAATGCCCTTCACAATGCAACTCTTTATCT
ACTATGAACCTACAAAATAATGGAGATAGTGGTTGCAATGCTCAGAACAC
CAATTTGGCCATGAGCTGCGATATACAAGAAAATATGGATGCCAACAAGA
GTGAAGCACAAGACTCTCACTCTTCCATGTGTCAGGGGGCATGCTATACT
TCCACAGAGGCTGTAGGATCCACTTTGCCTGAGGGGCATCACCATCTTTC
TTCGTCTTTTTCTCAAAGATTGGACCTGCAGATGGATGTACATGAAGGGT
CAGGTAATTCTATGTTTGTGGATGAACAAACGCTTTGTAGCACATCAAAG
CAAGAAAACTCTATGGTACCATTTGGTGTTGCGCAGGAAATGCCTGTCTC
TGTGCTATCAAGTGTTTCTGACGCTGAGCAGAAATTGCATTTAATCTCTG
ATGCAGACAGTCTGAAATCTGAACTTTGGAAAGACGTGTCCTTGCAAACT
CTAATTTCAGGAGATACAGTTGATGCTGATTCTTCTTCAGGACTAAATCA
ACTGCCAGATACTTCAAAAACGGACACCAACTTCTTGGCACAGTCGTACA
CATTACATACATCAAATCCATCCAGTGTGATGGAAACTCCGTATGAACCG
AGTACATTGGTGACAGTGCCTCCGTCTTTCCTGTGTTTAGATAGTTTACC
TGGTGCACCTGGAAATAGATCTCAGCCAATGGAAATTCTGGATTCTGAAG
CAGAGGTGATCACATGTTCAAACAATTCTTTTTGTGATGCTGAGCAATCA
GCTAAGCCAGGCAGCAGTGATGACATACCTGAGGATTTCACAATGATTGA
GAACAATACAAACTGCAGGAGCAAACAGTCCACAGAGGCCGAAGAAGCTG
TGGCCAGTACAGCAAAAGAACAGTTACCAAAAGACACTGAGCCTGTGCCA
GATGAAAAGACGGGTGAGGGGGCTCTATTCTACGAACCTCCTCGGTTTCC
AGGTTTAGATGTCCCATTTATCAGTTGTGATCTTGTAACTTCTGCTGATC
TGCAAGAATTTAGTCCCCTTGGGATTCGGCAGTGGATGCGGTCAACCATG
AATGTTCCCACTCCTTTAAGATTATGGGGATCCCCATCACATGATGAAAG
CCCAGATGTGCTAAAGACTTCTGCTGAAAGCTTCCCATGCACACCATCAA
TAATGAAGAAAAGACACAGAGGTCTATTATCTCCTACTCCAGATAAAAGA
ATTGAGAAGAAATCTGGGATTGCAAAGGAGATGACAGACATCTCCTATAC
GATTACAGCCACATGTTCCATGAATGCAACCAAAGATGAAGCAACAGTTA
CTGAATCGCTTGTGTGTGCTGAGCAATCTTCTTGTAAACATCTAGATAAG
AAATTCGAGTTCTCTGATGGTAACAAGGAAAATTTTGATGGAGCACCTGA
ACAAGCCAGAGATGCACAGAATGCAGGAAACAAACAGCTTGTGGATGAAG
GAGGGCAACAATGTTCCGTAAATGTCGCCAATCCTAATACCGATCTGCCA
GACAATTCACAACCTGTAGGTATTCTGGTTGAGCATGAGCATAACTCCAG
TGACCCCATTGCCACTGGTTATGGTGCAAAGCCTGGATGTTTGTCATTTT
GTAAGGAAGCAGTTAATTCAAAATCAAAGCCTGCGGATCTAGTTGTTGAG
AAATCATCACCATGCATCAATGCGGATTATGAATATGTGAACTTATTGGC
TGATACCCCAGGAGTCAAAAGAGGACTGGAATCTCCTTCAGCATGGAAGT
CTCCTTGGTATATAGATATGCACATGCACTTTCAGGGTTTTGTCAGCCCG
GCAGACAGAACTTATGATGCGCTAGGGTTAGTGAAGCAGATAAGTAAGCA
CAGTGCTGCTGCTGCAGTGGAGGCCTGTGAGGTGCTAGCAAGTGGCAGCC
GACCCTCTGATGAGGAAAACAAGGAAAATACTGATGACAAGGGGCCAGGG
ACAAGAAAATCGCAGACCAAAAGCATGGCCGAGGGTCGAGTCCTGGATTT
CGATGAATATACCACACCTGCAAGAACAGCAGATAAGAGACTGAGCAGCT
GTCTCGGAAGATCTGTTAGCTCACCCATTTTTTCCTCCCCCAACCTGAGA
AGTTTTCGATAG
>Pgl_GLEAN_10009766 PgMYB85
ATGGGGAGGCCGCCGTGCTGCGATAAGGCGAACGTGAAGAAGGGGCCGTG
GACGCCGGAGGAGGACGCCAAGCTACTGGCATACACCTCCACCCATGGCA
CCGGCAACTGGACCAATGTGCCCCAGAGAGCAGGGCTGAAGAGGTGCGGC
AAGAGCTGCAGGCTGAGGTACACTAACTACCTGCGCCCCAACCTCAAGCA
CGAGAACTTCACCCAGGAGGAGGAGGATCTCATCGTCACCCTCCACGCCA
CGTTCGGATCCAGGTGGTCTCTGATCGCGAACCAGCTGCCGGGGCGCACG
GACAACGACGTCAAGAACTACTGGAACACGAAGCTGAGCAAGAAGCTGCG
GCAGCGCGGGATCGACCCCATCACCCACCGCCCCATCGCGGACGTCATGC
ACAACATCAGCGTGCTCGCCATCCGCTCGACGCAGCCGGCGCCCTCCCAC
AACGGCTCCTCCTCCTACCTCCACTCGGCAGCGCTCCCGCTCGTCCACGA
CGTCAAGTACCACGCCGCCGGCATGCTGCCGCCGCCACAGCAGCAGGCCG
TCATCGCGCGCCAGATTCTTGGCCAGTACCACCACCACCACGACGCCGCC
ATGGCGGCCCCCGGAGGCGGCGTTCTGGCTGCTGGGAGCAGCAGCGCGGG
TGGCGGCGACGACGGCGCGGCAGCGTTCATCGACGCGATCCTGGACTGCG
ACAAGGAGACCGGGGTGGACCAGCTCATCGCCGAGCTGCTGGCGGACCCG
GCCTACTACGCCGGCTCCTCCTCTTCCTCGTCGGAGATGGGATGGGCTGC
TGATTAA
>Pgl_GLEAN_10038634 PgMYB86
ATGAGGATCATGATAAAGGGCGGCGTGTGGAAGAACACGGAGGACGAGAT
CCTCAAGGCGGCCGTCATGAAGTACGGCAAGAACCAGTGGGCGCGCATCT
CGTCGCTGCTCGTCCGCAAGTCCGCCAAGCAGTGCAAGGCGCGATGGTAC
GAGTGGCTCGATCCATCCATCAAGAAGACTGAATGGACAAGGGAAGAGGA
TGAGAAGTTGCTCCATCTTGCTAAACTCATGCCTACACAATGGAGGACAA
TTGCACCTATTGTTGGCCGGACACCATCTCAGTGCCTTGAGCGTTATGAG
AAACTGCTTGATGCTGCCTGTGCAAAAGATGAGAGTTATGAGCCTAATGA
TGATCCAAGGAAATTGCGACCTGGTGAGATTGATCCAAATCCTGAGTCAA
AACCTGCTCGTCCTGATCCTGTTGATATGGATGAAGATGAAAAGGAGATG
CTTTCTGAGGCAAGGGCTAGATTAGCTAACACAAGGGGCAAAAAGGCTAA
ACGGAAAGCAAGAGAAAAGCAACTTGAAGAGGCTAGACGGCTTGCTTCAC
TGCAAAAAAGGAGAGAGCTGAAGGCTGCTGGGATTGATACACGGCAGAGG
AAGAGGAAGAGGAAGGGTATTGATTATAATGCTGAGATTGCTTTTGAGAA
GAGACCACCTCCAGGTTTCTATGATACGGTTGGTGAGGATAAGCCACCTG
AGCACGTGCAATTTCCAACTACTATTGAGGATCTTGAAGGGAAGCGGAGA
GTGGATGTAGAGGCACAATTGAGAAAGCAAGACATTGCCAGGAACAAGAT
TCTGCAGCGGCAAGATGCCCCAGCTGCAATAATGCAAGCCAATAAACTCA
ATGACCCTGAAGCTGTCACAAAGAGGTCCAAACTAATGCTTCCGCCACCA
CAAATTTCTGATCATGAGTTAGAGGAGATAGCAAAGATGGGTAGTGCTGG
TGATCCTGCCCTAGCTGAGGAGCTTGGCGAAGGAAGTACTGCCACGAGAG
CCTTGCTATCGAGCTATTCCCAGACGCCAAGGCTTGGTATGACTCCATTG
CGAACTCCACAGAGAACTCCAGCTGGTAAGGGTGATGCTATTATGATGGA
GGCAGAAAATCTTGCACGTCTAAGGGAGTCACAAACACCTCTTTTAGGAG
GTGATAACCCAGATCTTCATCCATCAGATTTTTCTGGTGTTACACCACGT
AAGAAGGAGATACAGACTCCAAACCCCATGGCGACACCCTTGGCATTGGC
AAGCCCTGGTCCTGGTGCCACCCCACGGATTGGCATGACACCCTCCAGAG
ATGGGAATTCCTTCGGTTTAACTCCAAAAGCTACTCCCTTTCGAGATGAG
CTTCGCATAAATGAAGATGTAGAACTGCACGACAGTGCTAAGCTTGAGCT
TCGTAGACAAGCTGAACTGAGAAAGAGCTTACGATCTGGTTTTGCTTCTA
TTCCACAGCCTAAGAATGAGTACCAAATAGTTATGCCACCTATCACTGAG
GATGAAAAGGAAGAGGCTGAAGAGAGAATTGAAGAGGACATGTCAGACAG
GTTAGCGCGAGAGAGGGCCGAGGAACAAGCAAGGCAGGAGGCATTGCTCA
GAAAAAGATCCAAAGTGTTGCAGAGAAGTTTGCCTAGGCCACCTGCTGCT
TCAGTAGAGGTTCTTCGGCAGTCTCTCATTAAAGGTGGTGAAAGCAGAAG
CAGAAGTACCTTTGTGCCTCCAACATCACTTGAACAGGCAGATGATCTGA
TACATGAGGAACTCCTTCGGCTCCTTGAGCATGATAATGCTAAATACCCC
CTTGATGAAAAAACTCAGAAAGAGAAAAAGAAAGGGAACAAGCGGCAGGC
AAATGCAACAGCAGTTCCTGAAATTGAGGATTTTCACGAGGATGCATTAA
AAGAGGCTAGTTCTTTGGTTAAAGAGGAGATTCAATATCTTCGTGTGGCA
ATGGGGCATGAAAATGATTCTTTTGATGATTTTGTGAAAGCTCATGATGC
ATGCCAAGAGGACCTTATGTATTTTCCTGCAAACAACAGCTATGGTCTTG
CCAGTGTCGCTGGAAATGCTGATAAGATTTCCGCTTTGCAAAATGAGTTT
GAAATTGTGAAGAAGAGAATGGATGATGAAGCTAAGAAGGCTTCCCGTCT
TGAGCAGAAGATCAAACTTCTGACACAAGGGTACCAGGTACGAGCTGGGA
AACTGTGGTCGCAGGTCCAAGACACATTCAAACAGATGGATACTGCTGCA
ACAGAACTTGAATGCTTCCAGGAGCTCCAGAAACAGGAACAGTTGGCAGC
TTCCTACCGTGTTAGAAATTTGACTGAAGAAGTGGATAAACAGAAAGCAT
TAGAACGAACACTCCAAAGCCGTTATGGTGATTTGCTGTCTATTTACCAC
AGAATGCAAGAACAGCTTGAGGAACACAAGGTTCAACTTAGGAAACAGGA
GGCAATAGAAGCAGAAAATCGTGCTCGAGAGGAGGCTGCAGCACAGAATC
GTGCTGACGAGGAAGAAAATGAAAGGACACGTAATGTTGAAGAGGGGAAA
GAACAGACAAACAGTGTTCCTGATGAGGTTCCTGCAGGAAGCAAGCAAAT
CAATGAGGATCAGATGGATGTGGACACGAGTAATGTAGATGGGGAATTCG
TTGGTCCTATTCCCCCAGCACCAGATACTCAAGGGGATAGCACTGAGGCT
TGTGGTCAAGAGAGCTCTTCTAATGCTCAGAGTGGTGATGACGTCACCAC
GAATGGTGAAGCATGTGATATGGTCAATGCATCCAAGCTAGAAAGTCAGG
GTAACTCCAATGGCAGTTTGCCTGTGGATGCTGGCAATCAGGAAGATGAC
AAGAGTAACCTTCCATTGGTTGGTGCCAATGAAGGAAATACTGCTTTATC
CTCTGATGGTGGTGATGCTGTCACAGATGAGTAG
>Pgl_GLEAN_10010553 PgMYB87
ATGGGGCGATCGCCGTGCTGCGACAAGGAGGGCCTGAAGAAGGGGCCGTG
GACGCCGGAGGAGGATCAGAAGCTGCTCGCCTACATTGAGCAGCACGGCC
ACGGCTGCTGGCGCTCGCTGCCCGCCAAAGCCGGGCTGCAGCGGTGCGGC
AAGAGCTGCCGGCTCCGGTGGACCAACTACCTCCGGCCGGACATCAAGCG
GGGCAAGTTCAGCCTGCAGGAGGAGCAGACTATCATCCAGCTCCACGCGC
TGCTCGGCAACAGGTGGTCGGCGATCGCGACGCACCTGCCGAAGCGCACC
GACAACGAGATCAAGAACTACTGGAACACGCACCTCAAGAAGCGGCTGGC
CAAGATGGGTATCGACCCCGTCACGCACAAGCCGCGCTCCGACGCGGCGG
CGGTGGCGGCTCGCGCCGCCATGCAGCCCATGCAGGCTTACGAGGAGGCG
TGCAAGGAGCACGAGGAGCAGCAGCAACAACAGCAGCAGTGGGGCGATCA
TGTGGTCCATGCCGCCGACGCCGCGGCCTTCGCCGGGGTGGGGTTCACGG
GCCTCCTTCTCGACGGCGCCTTGAACCAGCAGGACCTGCGGCCGGCGGCG
GCCAGGCACGGCGCGGACGACGACGCCGGGCTGCAAGAGACAGAGGAGGA
GAAGAACTACTGGGACAGCATACTGAGCCTGGTAAACTCGTCTTCGGTGT
CGCTGCCGACGTCGTCCGTCGCGGTGCCCACGACCGAGGGGTACTCGTCG
TCGGCGTCGCTGACGACGTCAGCAGTGGTGATTGCGCCCGAGGCGTACTC
GTCGTCGACGTCGTTGGCGACCTCAGTCGCGATGCCCACTCCCGAGGCGT
ACTCGCCGGCGCCGGAGTTCTGA
>Pgl_GLEAN_10000886 PgMYB88
ATGTCGCCGCCGGCGGCCGCCACCTCCGGCGACGGGCCGCCGTCGTCGCC
GCGCGAGCTCTACACCATCCCGGCCTCATCCGGTTGGTTCCGGTGGGACG
GGATCCACGAGACGGAGCGGGGCGCGCTGCCGGAGTTCTTCGGCGGGGCC
GGCGGGGCCGGGTTCGGGACGGCGACGCGGAACCCGCGGATCTACCGCGA
GTACCGCGACTTCATCATCGCCAGGTACCGCGAGGACCCGTCGCGCCGCC
TCACCTTCACCGAGGTCCGCAGGGCGCTCGTCGGGGACGTCACGCTCCTC
CGGAAGCTCTTCGCCTTCCTCGACACCTCCGGCCTCATCAACTTCTCGGC
CTCCTCGTCCTCGGGCCCCGCGTCGAGGCAGCAGGAGGTGGGGGTCGTCG
TGGAGGCGCCCGTGGGGCTGCAGGTGACGCCGCGGCCGCCAGCATCCTAC
TTCGCCGAGGAGAAGCGGGGAGGCGCGGGCGGGGAGAGGGAGAACGGGTT
CCGCTTGCCCCCGCTGACCTCCTACAGTGATGTGTTTGGAGAATGGGCGC
CTGGGAAGGCCCCTGTATGTGGGTTTTGTGGCAAGGAGTGTGGTGATGAA
ACAATTGAGACGTTGCAGGATGGTTTTAAAGTATGTTCAAAGTGTTCCAA
AAGCAATAATGATAACACGGAAGAAGCGAATAGATGTCCTGGTGACAAAA
AGGAGAGTATGAACATCCATGCTTCCAGTGCATGGACAGATGCGGAGACG
TTACTCCTTTTAGAAGGAGTCCTAAAACATGGAGATGACTGGGATCTTAT
TGCCCAGCATGTCCGCACAAAGAATAAATCAGAATGCATAGCAAGGCTTA
TTCAGCTGCCTTTTGGTGAACATATGCTAGGCACAATAAATGGTAAATCT
GTTAACAGGCTACACATGAACCAGGCAACTGATGGGAAAATGAACCAGCA
CATCATGAAGGAGTCTTCAAGCAATTCAACTGAAATGGTTGATGACATGC
AGATTGATGGAAATGAAGATAGTGCTGATAAATCAGTTGAAGAACATCCT
ACAAAACGAAGACGGTTATTTTTTTCAATGGATGCTACCACTTCATTAAT
GGAGCAGTTAGCACTCCTGACCACATCAAGCAGTCCAGATGTTGTTGCTG
CAGCTGCTGATGCTGCAATTAAAGCTTTGAGCGATGAAAACCCCCAGGCA
AGGAAAGCCTTTCACCTCAGTGAGCAAGAATTTAAGACTAAGGCATTCGC
TTCAAACCATGTCCAACAGATCGATCGCAAAGTTAGCAATAAGGATGTGG
AAATGCATGGCTGGACTGGTTCTGATAAGAAGCAGGAAAAGAAGTCCACT
GCTAATGCATACCAAGTGAGGGCAGCTGTTGCTACTGCTATTGGTCTAGC
TGCTGCCCGTGCTAAAATGCTTGCAGACCAGGAGGAGCGAGAAATGGAGC
TCCTAATGGCGTCAATAATTGAAACTCAGCTAAGAAAGATGCAATACAAG
ATCAAACACTATGAGGAGCTGGAGTCGGTCATGGAGCTGGAGCACGCCAC
TATGCGGCAAATGAAGGGATCCCTCATGAATGAATGGCTAAAAGTCCTGG
AGCAAGCAATCCGGACTGGAGTGTCAGTACCGAGAGATGAATTGCTCATA
AAGCTGTTCCTGAACCAGTCCACGGCATGA
>Pgl_GLEAN_10012731 PgMYB89
ATGGGGCGCGTCCCGTGCTGCGAGAAGGACAACGTGAAGCGCGGGCAGTG
GACGCCCGAGGAGGACAACAAGCTGCTCTCCTACATCACGCAGTACGGCA
CGCGCAACTGGCGCCTCATCCCCAAGAACGCCGGCCTGCAGCGCTGCGGC
AAGAGCTGCCGCCTCCGGTGGACCAACTACCTCCGGCCAGACCTCAAGCA
CGGCGAGTTCACGGACGCCGAGGAGCAGACCATCATCAAGCTGCACTCCG
TCGTCGGCAACCGGTGGTCGGTCATCGCCGCGCAGCTCCCCGGGCGCACC
GACAACGACGTCAAGAACCACTGGAACACCAAGCTCAAGAAGAAGCTGTC
AGGGATGGGGATCGACCCCGTCACGCACAAGTCCTTCTCCCACCTCATGG
CCGAGATCGCCACCACGCTGGCCCCGCCGCAGGTCGCGCACCTCGCCGAG
GCCGCGCTGGGTTGCTTCAAGGACGAGATGCTCCACCTCCTCACCAAGAA
GCGCCCCACCGACTTCCCCTCGCCCGCTGACGACTTCCGGTACGACACTG
GGACGGTGCCGGACTACGTCCTCGGCGGCGGCGCCGGCGAGGCGGACCAG
GGCACGTCAATGTGGAGCCACCAGAGCTTGTACAGCGGGAGCTCGGGCAC
CGATGCGGCGGCCAGGCCGGCACCGGCATTGCCGGAGAAAGGCAACGACA
GCGTCGGTAGCAGCGGCGGCGGCGACGAGGAGGCGGACAACGTCAAGGAC
GACGGCGGGAAGGGCGACGGCTCCGACATGTCCGGGCTGTTCGGATCCGA
CTGTGTACTCTGGGACTTGCCTGATGAGCTGACCAATCACATGGTGTAA
>Pgl_GLEAN_10018370 PgMYB90
ATGGAGGATGCGCCGCTCGGCTGGGGACGGCAGGAGGTGGACGGGTGGAG
GAAGGGCCCGTGGACCAGCCAGGAGGACAAGCTCCTCGTCGAGCACGTCC
GGCAGCACGGCGACGGCCGCTGGAACTCCGTCTCCAAGCTCACAGGGCTG
AAGAGGAGCGGCAAGAGCTGCAGGCTGCGGTGGGTTAACTATCTGAGACC
GGATCTGAAGCGAGGCAAGATCACACCCCAGGAGGAGAGAATCATCGTCC
AGCTCCATGCTTTGTGGGGAAACAGGTGGTCGACGATCGCAAGGAGCCTG
CCGGGCAGGACGGACAACGAGATCAAGAACTACTGGAGGACGCACTTCAA
GAAGGGGAAGCCGTCCAAGAACATCGAGCGCGCGAGGGCAAGGTTCCTCA
AGCAACGGCAGGAGATGCAGAGCCAGAAGCAGCAGCTGCTGCTGCAGCAG
ATGGGGCAGGTCGCCAAGGACGATAACGAGGAGTACGGCGGCGCGCGCGC
ATCAGTGCCGGCGGCCGACGACGACGACCGCGGAAGCGTGNNCCCCATGT
CCTGCGCCCTCCTCCTCCACGGCGCCGTGGTCCAGGGCGGCGCCGGCACC
GGCAGCTGCTGCGGCTCCACCGCCAGCGACGAGTACGGGTCCAGCGAGGA
GGACGGCGCCACGTGGGGCAGCCTTTGGAACCTTGACGGCGTGGTCGACG
ACGGGGCATGCACGCTGTGGTAG
>Pgl_GLEAN_10035636 PgMYB91
ATGGGGAGGGCTCCGTGCTGCGAGAAGATGGGCCTCAAGAGGGGGCCATG
GACGCCGGAGGAGGACAAGGTCCTCGTCGCCCACATCCAGCGCTTCGGCC
ACGGCAACTGGCGCGCCCTGCCCAAGCAAGCCGGGCTGCTGCGGTGTGGG
AAGAGCTGCCGGCTCCGGTGGATCAACTACCTGCGCCCGGACATCAAGCG
CGGCAACTTCAGCAAGGAGGAGGAGGACGCCATCATCCGCCTCCACGAGG
AGCTCGGCAACAGGTGGTCCGCGATCGCCGCCAGGCTGCCGGGGAGAACG
GACAACGAGATCAAGAACGTCTGGCACACGCACCTCAAGAAGCGGCTAGA
GCCCACCACCGAGCAGGAGGAGGAAGGCGGCGAGCGATGCCGCCGCCGCC
GCGCCGGTGTCGTCGCCCGAACGGGCAACACCGGGAGCTCGTCCTTGTTC
CCCAAGGAGGAGAGCTTCACCTCGTCCGCGCCGGACGCCGAGGAGTTCCA
GTTCGACGAGAGCTTCTGGTCGGAGACGCTGTCGATGCCGCTGGAGAGCT
TCGACATCCCCATGGAGCCCCTCGACGCGTTCGGCGCCGCGGCCACCTCG
TCGGCGGTTGGCGCCGCCGACGACATGGACTACTGGCTAAAAGTGTTCAT
GGAGTCCGGCGAGGTGCACCAAGAATTGCCGCCGATTTAG
>Pgl_GLEAN_10003061 PgMYB92
ATGGGGAGGACTCCGTGCTGCGACAGCAAGGGGATCAAGAAGGGCCCGTG
GGCGCCCGAGGAGGACAAGCTGCTCGTCGACTTCGTCCAGGCCAACGGGC
CCGGCAACTGGCGCATGCTCCCCAAGCTCGCGGGGCTGAACCGGTGCGGC
AAGAGCTGCCGGCTCCGGTGGACAAACTACCTCCGCCCCGACATCAAGCG
CGGGCCCTTCACCCCCGAGGAGCACAACTCCATCCTCCAGCTCCACGCCG
TCGTCGGCAACAAGTGGTCCATGATCGCCGCGCAGCTGCCGGGGCGGACG
GACAACGAGATCAAGAACTACTGGAACACGCACCTCAAGAAGCAGCTCCG
CCAGGAGGCGCTGGCCGGCGCGGACGCCGCCGCCACACAGCAGCTCGCTT
TGGCGGCGGACGACTACCACGCGTTCCTGGAGCTGGCGGTCGAGGAGTTC
GCCCTGCTGCACGGCCGGCTCGGGGGCGCGTCGTCGTTCTCGGAGTTCAC
GCCGGCCGACGCGCACGTTCTCGCCGAGGCGTCGTGCCTGTTCACGCCGT
TCGAGTAG
>Pgl_GLEAN_10003063 PgMYB93
ATGGGGTGCAAGGCGTGCCAAAAGCCCAAGGTGCAGTACCGCAAGGGCCT
GTGGTCGCCGGAGGAGGACGAGAAGCTCCGCGACTTCATCCTCCGCTACG
GCCACGGCTGCTGGAGCGCGCTACCCGCAAAGGCCGGGCTGCAGCGCAAC
GGCAAGAGCTGCAGGCTGCGGTGGATCAACTACCTGAGGCCGGGTCTGAA
GCACGGCATGTTCTCCCAGGAGGAAGAGGACACCGTCATGGGCCTGCACG
CCAGGCTCGGCAACAAGTGGTCTCAGATCGCGCGGCACCTGCCAGGCCGG
ACCGACAACGAGGTGAAGAACTACTGGAACTCGTACCTCAAGAAGCGCGT
CGAGGGCGGCGCGCAGGCCAACCTGGCAACGCTGGGTTCGGACGCTGGCG
TCTTCAACGTGAGCGGGCGCAGCCCAGGAGGGCAGGGACTGAACCACCAG
GGGTCCGTGCAGGTGGACGGGCCATGCGGCGCGGTGGATTCCCTGCACGG
GCTCGGCGACGGCGGCATCTGCGGCTGGGGGTTCGACGACGCGGCGGCGG
ATCATCAGATGGACGTGCAGGGAGGAGGGTTCTGCGATCTGCTCTCAATG
AGCGAGTTCCTTGGGATCAACTAG
>Pgl_GLEAN_10033575 PgMYB94
ATGGCTCGAGCACCTAGCGGTGGCCGGAGGCGGGGCAGCAGGAGGGACGC
GGCGGGCGGCGGGGAGGGGGTGCGGAAGGGGCCCTGGATGGCGGAGGAGG
ACGCGGTGCTGCTGGAGCACGTTCGCGCGCACGGGCCCTGCGACTGGAGC
TCCATTCGATCCAAAGGTCTTCTGCCGCGCACCGGCAAGTCCTGCCGCCT
CCGCTGGGTCAACAAGCTCAGGCCGAACCTCAAGACTGGCTGCAAGTTTT
CCGCCGACGAGGAGCGGGTGGTGCTGGAGCTGCAGGCGCAGTTCGGGAAT
AAGTGGGCGAGGATCGCCACCTACTTGCCGGGGAGGACGGACAACGACGT
CAAGAACTTCTGGAGCACCCGACAGAAGCGCCTCGCCAGGCTCCTGCGCG
CACCGCTCCCCGGCCCGTCCAGTAGGAGCACCAGAGCCAAGCAGGCGCTT
GCGGCCTCGACCTCGTCTCTGCAGTCGCGCCCCTCCGCCGTGGGTCCCAG
CGATCGAGTTCCAGAATGCAGCTCCTCCGGCGTCCACCCATGCAGCGCAG
CAACACCATTCATGAACGCCCAGAATGCTGTCCCGTATGATCAGGCGGCA
GGCTCCAGGCTTGTCGGATTCAACGGAGCGCTGCTGCCGTTCGCGCCGGC
CATCGACAGCCACTCGTGCTCCTCCTCCTCAAACGCAGCCCCGCTGCAAA
CCAAGCTGCCCTTCGATGAGCCCCCGTACCCTCTGCTCGACTACCCAGGG
ATCCCGGAGGGTTGGAGCATGGCTCCCGGCGGGTTCATCAACGCCGGCGC
TATGGACGATCTCGCCTACCAGGAGCTGCTCCCGATGGTGACGCAACCTG
CTCCGATGATCTTCCCGTTCTTCGGCACGGGGTGCGCGCAAGGTGGTGTC
AAGGCCGAGCCCCCGGACGCGCCCGACTTCTTCGACGACCTCCCGCCGGA
CATGTTCGACTCCTTTGATCAGTTGCCCCCGCCGTGGTCGCCGCCTGCAA
CGAGCTCTGGATTCTGA
>Pgl_GLEAN_10015401 PgMYB95
ATGGGGAGGAGGCCGTGCTGTGCCAAGGAAGGGGTGAAGAGAGGGGCGTG
GACGAGCAAGGAAGACGACATCTTGATCGCCTTCGTCAAGGCCCATGGTG
AAGGCAAGTGGAGGGACGTCCCTCAGAAAGCCGGTTTGCGCCGGTGCGGC
AAGAGCTGCCGCCTGCGGTGGCTCAACTACCTCCGGCCCAACATCAAGCG
CGGCAACATCTCCGACGACGAGGAGGACCTCATCATCAGGCTCCACAAGC
TCCTCGGCAACAGCGCGCCGTGCTTCTCCGGCGGTGGCGACTGGATGGAC
GACGTGAGGGCCCTGGCATCGTTCCTCGAGTCCGACGAGGAGTGA
>Pgl_GLEAN_10018049 PgMYB96
ATGGGCGGCGGCGGCAGGAACGGCGCTGTGAGGCAGTACATCCGGTCCAA
GGAGCCCAGGATGAGGTGGACCGCCGACCTCCACCGCAGCTTCGTCCGAG
CCATAGAGTGCCTCGGCGGCCAAGACAAGGCTACGCCCAAGCTCATTCTC
CAGTTCATGGGCGCCAATGGGCTTACCATATCTCATGTCAAGAGCCATCT
CCAGATGTACAGAGCTGAGAGGCTTGGCGGGGCAAGACGAGGGATGCAAG
CGGCCCAGCTGCAAAGGAGGCACTCATGCACCGTTGATGAGCAAGGCCCC
AAGGAGTTGCTGTGCCCACCACTGAAAAGGGCCAGGATGGGGACGGCGGC
CGCATACGAGAGCATGCAGGGAAGCCATGGAATCAGTGAGGCGAGGACGG
CCGCTGCAGCAGCTGTGTACCGCATGGATGATTACTCCATGCAAGCCATG
GCGACGCGCAGGAGAATAAAGGAGGAGGGCCGGAGATGGCAGGGGAGGGA
TGCTGCGGCTGCGGCTGCGGCTTCCAGCCTCCCAGCCGTGGGATGTCTGG
TGCAAGAATCTGACCCCTTTAAGATAAGCAGACCAGAAGCCAACCATCCT
GTTCTTGCGCCGGATCAGAAGCAGGGCTCAGTCGCGGATGGAAATGGAAA
CGGAAACGGACGCTCCCTCTTCGGCAGTTTCAGTACTGCAGCAAAGGACG
AGACACCCGAGCAGTGCTCCCTGTCACTGTCCCTTGGTCTGGAGCCAAAC
AACTGCACCCGCGCCATGGTCGCCTCCTCGCCGAGCGAGAGCAGCTGCAT
CCTCACGGCCTCTCCGGCGAGGAGGAGCTCCAGTGACTGCTCCGGCCATT
CAGACCGCTTTGCCGGCCCGGGTTTAAGCTTGGAGCTGTCCCTGGCCACG
TGTGGGTTTTAG
>Pgl_GLEAN_10022511 PgMYB97
ATGGCTCCTTTTCAGGAAATCAAGGCGACGAGCGACCAGAGGCCAGCTGC
TGATCGTGCTGGCCATGGAAACTGCATGGACCACCTGAAGAACGCTCTGA
ATTCCGGTGCGATAGACTTGCCCGAAGGAGCAAGGGCCCCTAAGGCACGC
AAGCCTTACACGATATCCAAGCAGAGGGAGAAATGGACGGAGGACGAGCA
CAAGCTCTTCCTGGAAGCCCTTCAGCAACATGGCCGTGCCTGGCGTCGTA
TACAGGAGCACATAGGCAGCAAGACTGCCGTGCAAATCAGGAGCCACGCT
CAGAAGTTCTTCTCCAAGGTCATCCGAGAATCCTTTGGGGACAGCAACAG
CATAGCTGCTCCACCACAAATTCAGATTCCTCCGCCACGGCCAAAGAGGA
AGCCTTCGCACCCGTACCCACGCAAGCTGGGTAATTCACTCCGCAAGGAT
GCCTCTGCAATCAAACAGCTTGAGAAGCCCCAGTTGAAGGTACAGTCCCT
GTCTGAGCAGGAGAATTGCTCGCCGAAATCTTTGCTAACCACAGCACAGA
TAGGCTCTGAGATCCTGGCACTTGAAGGTAGTGGATCACCAGCTTCCTCG
GTTTACATGGAGGAGAAGTGCCTCACACCAAGCACATCAGTTGAGGAGTT
GGGTGTGCAAGTAGCGCTTTCAAAGGATGCCACCACTTCTGATGGTGCAG
CATGTGGAATGCGTGAAGGTCCAGTCCTTAGGCTATTTGGCAAGAGGGTC
GTGGTGAATAATTTGCATGAGCAGCCAATCTCGAATACTGCAAACCTACA
ACATGTGGCACACATGGAGCTGGACAGTTCAGCTGAGACACCAACTAGTG
GAACTGGGAAGGTCCCTTCCCATGGGGCAGAAGAAGCAAAGAAATGGAGC
CCGTGGCTGACCGGTACACAGCAGTTTATGTACTATCTTCCTCAAGGGGA
GGTTCTTTCCTTCCATTCTGCTTGCCAATTTCTCAACTACGGGAATGGAA
GCATATCTTACAGAGTATTGAGCCCACAAACAGTTACCTCAGATAAGCAA
CAGCACCAACCATCTCAACCTGCAGACTGCAAGTTCACTAGGGCAGAAGG
ATCGTGGACGGAATCGATGACAACCTCCAATAGTGTGCCTGAAACAACTC
CTCAGAGTTCAGAATCTGTAGAATCTACACAAGTAAACAGCAATGAAGAT
GAAGTGATAACTGTTCCAGGTTCAAGAAAATATTCCACTGCTCCAGCCTA
CCTACAAGGTTTTATGCCATACAAAAAGTGCACAGCTCAAAGCAAGATGC
TGCAGGCACTGGTGCCTGGTGAGGAGGCAGATGGAGAGATGACAAGGCTG
TGCCTGTAA
>Pgl_GLEAN_10023805 PgMYB98
ATGGGGAGGTCGCCGTGCTGCTGCCACGACGCCGGCGTGAAGAAGGGCCC
GTGGACGGAGGAGGAGGACCGGGCGCTGGTGGAGCACATCCAGAGGCACG
GCGGGCACGTCGGCAGCTGGCGCAACCTGCCCAAGGCCGCCGGGCTGAAC
CGCTGCGGCAAGAGCTGCCGCCTCCGGTGGACCAACTACCTCCGCCCCGA
CATCAAGCGCGGCAACTTCACCGACGACGAGGAGCGCCTCATCATCCGCC
TCCACGCCGAACTCGGCAACAAGTGGTCGACGATCGCGACGCACCTGGAC
GGGCGGACGGACAACGAGATCAAGAACTACTGGAACACGCACATCCGGAA
GAAGCTGCTGCGCATGGGCGTCGACCCCGTCACGCACCAGCGGCTGCCCC
CCGACGACATCCTCAGCGGCGCNCGCTCCTCTCGGCGGCGGTCAGCCTCG
GAGGCCTCAACAGCGTCCTGA
>Pgl_GLEAN_10023817 PgMYB99
ATGGGGAAGGGCCGGGCACCGTGCTGCGCCAAGGTTGGGCTCAACAAGGG
CTCCTGGACGCCGGAGGAGGACATGCGCCTCATCGCCTACATTCAGAAGT
ACGGCCACGCCAACTGGCGCGCCCTGCCCAAGCAAGCAGGTCTGCTGCGG
TGCGGGAAGAGCTGCCGGCTGCGGTGGATCAACTACCTCCGCCCGGACCT
CAAGCGCGGCAACTTCACCGCCGAGGAGGAGGAGGCCATCATCAAGCTGC
ACGGCATGCTCGGCAACAAGTGGTCCAAGATCGCGGCGTGCCTGCCGGGC
CGGACGGACAACGAGATCAAGAACGTCTGGAACACGCACCTGAAGAAGCG
GGTGTCGCCGGGCGCGGAGGAGCGCGGCGCCAAGAAGAAGAGGAAGAAGC
CCTCCGGCGCCGGGGTGCCAGCTGCGGGCCCGTCGCCGTCGCCGTCCTCG
TCCACGACGACGGCGACGACGACCAACTGCTCCAGCGGCGACGACTCCGG
GGAGCAGCAGAGCAACGCGAGCAAGGACGATGAGCCGGCCGGCGACGAGC
TGGGCCTGGAGCTGGAGAAGCTCGAGATGATCCCCATGCTCGACGACCCC
GCCTGCTTCGACTTCGACATGCTGGTGGACCACGCGCCGGGGCCGTACTG
CCCGGCCGTGTCCGTGTCCGTTCCCACCTCGCCATGCGCCTCGTCCACCA
TCATCGACGGCGACGGCACCGGCGGGGCCGTCGCGGTCGGGACTGCACCG
GCGCCGTGCCAGAGCAATGCAACAGAGCCGAACGCCGCCGCGAGCACGAC
CACCACCAGCCACGGTGGGGCGGAGTGGTGGTTGGAGGACCTGGAGAAGG
AGCTGGGCCTGTGGGACCCCATGGACGACGACTACCAGTACCCGATGATG
ATGGGCCCACAGTGTCCCGTCGCTCACCCAGACCCACTCCCTGCCATGGT
GGAGGATGACCCAGTGTCGTGCTACTTCCAGGCGGGTCCCGCACCGCCGG
CGGCCATGCTCCAGGAACCGGCAGCCGGTTACTCTGCTGTTGTTGCAAGT
AGTAACCAGATGGGTTTCTGA
>Pgl_GLEAN_10004210 PgMYB100
ATGTCGCGGGACCCCAAGCCGCGGCTGCGGTGGACGCCGGACCTCCACCA
GCGCTTCGTCGACGCCGTCGACAAGCTCGGCGGCCCGGACAAAGCAACGC
CAAAGTCGGTGCTCAGATTGATGGGCATGAAAGGCCTCACTTTGTACCAT
CTGAAAAGCCATCTTCAGAAATATAGACTCGGAAAACATGGAAAGAAAAG
CACAGGTCCGGAACTTGCCAAGGGCAGTGGATATGCCGCACCATGCCTCA
GTTTTCACACTCCAGCTCCTATTCCAGGAGTTCCTACTGAAGGAAAGAAC
ACAGGAGAGATGCCACTTGCTGATGCACTAAGGTATCAAATTCAAGTTCA
AAGAAAACTACAAGAGCAACTTGAGGTGCAAAAGAAGCTGCAGAGAAGAA
TTGAGGCCCAAGGGAAGTACTTAAAGGCAATACTGGAGAAAGCTGAGAGA
AACATTTCCTCAGATGCAAATGCACCCAGTGACAACATAGGATCAACCAG
ATCACAGCTCATGGACTTCAACCTAGCACTGTCAGGTTTCATGGACAATG
CAACTCGAGTGTGCGAAGAAAATAATGAACAATTGGTGAAAGCTTTATCT
GATGACAACCATAAAGATAATAATTTAGGCTTTCAGCTCTACCAAATAGG
AAGTCATGAGGCAAAGGAAGTCAAATGGACACCAAAAACTGGAGACTCTC
TCCGACTAGACTTGAATATTAAAGGCAGTTATGACCCCTCCTCTAGAGGA
ATGCAAACATGTGAGCTAGATTTGAAAATCAACGAGCAGATGATATAG
>Pgl_GLEAN_10031939 PgMYB101
ATGGCGCCGCCTGACGAGGGGGCGTCGGCGGCCGTGGTGCCGCCTATGGC
CGGGGCCGTGCAGCCGCCGGTGGCGAGGAAGTCGGCGTGGACCAAGCACG
AGGACGACACGCTGCGGGAGCAGTCATGCCGCCTCCGCTGGTGCCAACAC
CTGAACCCCAGCGTCGACGCCGCGAGGCCCTTCTCCCGCGAGGAGGACGA
GAAGATCGTCGGCCTCCACCGCCTCTTCCCCAGCAAGTGGGCCACAATCG
CCGGCTTCCTCCCCGGCCGCTCCGACAACGCCGTCAAGAACCGCTGGAAC
TCCGTCCTCGGCAAGCAGCAGCGGCCACCGCAGCAGCAGCGCCCGATTAT
TGCTGCCCCCATCCGCCGCCTCTCCTACGTGACGCTCCCGCTGTTCCCTC
TGGCTCACGGGGATGTCAGACCGTTTGGCAGAGGCATCTACGATACGAGC
TCCGCCACCACCCGTCGCCAGGCGACGCGCGCGGGGGTTGATCTGAGCGA
GAGCGACGCGTGCCTGAAGCTGTTCCCCCTGGCGCCAGGGGATCTCGTTG
GGGACAGCAACATGGATGTGGATTGCGGCGCCGACGACCCGGCAGACACC
GAGATGACGCTGTGGCCCTCGTCGAGGGCCACCTCTATGGCGGCGTTCAA
GGCGATGGTGCAGGCAGTTCGGGCGCCCTAG
>Pgl_GLEAN_10031924 PgMYB102
ATGATGAACGCCAAGAAGATTAAGCTGCACGACCACCACTTTGGGTCGCC
GTTGTACGACCCCCAGATGTTTTCCACCACCACCGCTGCCGAGCTCTCCT
TCCACCCGGGGCTCGTGGGCTCCTTGCCGCAGCAGCATGGCGGCTGGCTG
CAGGAGGATTGCAGCCCGACACCGAGGACTGTCCTCGCGACCCAGGGCAC
CTGCGTCGGCTCCGACCCCGCCGCGTTCTTCGCCGCCGAGCACCTGCTGG
GCATGCCGCGGTTTGACTGCCCTCTGGGTTCGACGGCGCTCTCGGCGATG
ACAGCAACCAAGACGGCGGCGCCGTTCGTCCGGTCGCCGGAGGCCGAGCA
GCTGTACCGGCCGCTCGACCCGCTGCTGCTCCGCGACGGCTCGGTGAGGA
CGTACTACGTCAGGCCGCAGCAGCGGGACGCCACGGAGGCGCCTCCTGCA
CTGAAGCTGTCATTGCAGCAGCAGCAGCAGCATGAGCGAGTCCATGGGCT
GTACGGCAACGGTTCCACCGGCAGGCTGATGCTCGGCGGCGGCGGCGGCG
AACCCAAAGCTCCCTCCTTTTTACCTCATGTCACGGCGAACACGCACACG
CTTATCCAGGGGATGGAATCGCCGGGCATGCAGAGCTCAATTGAGAACAC
GTTGTCCAGGAGTTGCAGTATCGGTTCACCGGTGACCCACGCCGGGAACG
TCGTCGCCGCGGCCGGGCACGTCGCGCCGAGCAAGACGCGGATCCGGTGG
ACGCAGGACCTCCACGAGCGGTTCGTCGAGTGCGTGAATCAGCTCGGCGG
CGCGGACAAGGCGACTCCCAAGGGGATTCTGAAGCTGATGAACTCTGATG
GCCTCACCATCTACCACATCAAGAGCCACCTTCAGAAATACCGCATAGCC
AAGTACATGCCAGCATCGACATCCGAAGGGAAACAGGAGAAAAGAGCCGG
GGCAAACGACGCGCAGAATCTCGACCCCAGCACTGGAATGCAAATCACTG
AAGCACTACGCGTCCAGCTCGACGTGCAGAGGCGCCTCCACGAGCAGCTC
GAGATCCAGAGGAATCTGCAGATGAGGATCGAGGCGCAGGGCAAGAAGCT
GCAGAAGATGTTCGAGGAGCAGCTCAAGGCGAGTAGGACCGTGATGGAGC
CGACGGAGGAGGAGGAGGAGCTCCAGCTCCGAGACGCCGGCGGCGTCGGC
GCCTCCGCCGCCTTCCCCGGCGTCGGCGAGCAGGAGGGGGAGGACGACGC
GTTTGATGACGTGCAGCTGCTGTCCGTGGCGAGCACCGGCTACAACGATG
CCAGGTTCCCGTCGAAGATAAGCTAG
>Pgl_GLEAN_10031849 PgMYB103
ATGACCGTCGTGGAGGAGGCGAGCAGCAGCGGCGGCGAGGAGGGGGGGTC
CGGGGCGTGGACCCGCGAGCAGGAGAAGGCGTTCGAGAAGGACGCGGACG
GCGGGGACGCGCGGTGGGAGAAGATAGCGGCGGCCGTCGAGGGGAAGACG
GCGGGCGAGGTCAGGCGGCACTACGAGCTCCTGGTGGAGGACGTCGAGGG
CATCGACTCGGGCCGCGTCCCGCTCCCGACCTACTCGGCTGACTGCGGCG
CCGCCGAGGAAGGCGGCGGCGGCGGCGGAGGGAAGAAGGGGTCTGGGGGA
GGAGGAGGAGGGGCCCACGGGGAGAAGGGGTCGGCCAAGTCGGCCGAGCA
GGAGCGCAGGAAGGGGATCGCCTGGACAGAAGACGAGCACAGATTGTTTC
TTCTTGGACTTGAAAAGTATGGCAAAGGTGACTGGCGGAGCATCTCGCGG
AACTTTGTGATCTCAAGGACGCCTACTCAAGTAGCTAGTCACGCACAGAA
GTATTTTATCCGTCTGAACTCAATGAACAGAGAGAGGCGGCGATCAAGTA
TACATGACATCACCAGTGTGAACAATGGAGATGCTGCTCAGGGTCCAATC
ACAGGTCAAGCAAATGGGCAGGCCCCAAATCCTGGGAAGCCCTCTAAGCA
ATCTCCGCAGCTGGCAACTACACCTCCAGGTGTCGATGCTTATGGAACAA
CAATTGGACAACCTGTTGGTGGGCCCCTTGTCTCGGCGGTTGGGACTCCT
GTTACACTTCCTGTTCCTGCTCCACCTCATATAGCTTACGGCATGCACGC
CCCAGTTCCAGGAGCTGTAGTACCTGGAGCCCCAGTAAACATTGCTCCAA
TGCCATATCCAATGCCACCCCCATCATCTCATGGGTGA
>Pgl_GLEAN_10005856 PgMYB104
ATGAGGACCACGATCAAGGGCGGCGTGTGGAAGAACACGGAGGACGAGAT
CCTCAAGGCCGCCGTCATGAAGTACGGCAAGAACCAGTGGGCGCGCATAT
CGTCGCTGCTCGCCCGCAAGTCGGCCAAGCAGCGCAAGGCGCGCTGGTAC
GAATGGCTCGACCCCTCCATCAACAAGACTGAGTGGACAAGGGAAGAGGA
TGAGAAGCTACTTCATCTTGCTAAACTCATGCCTACTCAGTGGAGGACAA
TTGCACCAATTGTAGGTCGAACACCATCTCAGTGCCTTGAGCGCTACGAA
AAACTTCTTGATGCTGCATGTGTGAAGGATAAAAATTATGAGCCTAATGA
TGACCCTAGGAAGCCGCGTCCTGGCGAGATTGACCCAAACCCTGAGTCAA
AACCTGCACGCCCTGATCCTGTCGATATGGATGAAGATGAAAAAGAAATG
CTCTCAGAGGCAAGGGCTCGCTTAGCTAACACCAGGGGTAAAAAAGCAAA
ACGAAAGGCAAGAGAGAAGCAACTTGAAGAGGCAAGGCGGCTTGCCTCAC
TGCAAAAAAGGAGAGAATTAAAGGCTGCTGGTATTGATACACGGCACAGA
AAAAGAAAGAGAAAGGGAATTGACTACAATGCTGAGATCTCTTTTGAAAA
GCAACCACCTCCAGGTTTTTATGATACTGTTGGTGAAGACAGGCCGCTTG
AGCATGTGCAATTTCCAACGACCATTGAGGAGCTTGAAGGGAAGAGAAGA
GCTGATATAGAAGCACAACTGATAAAGCAAGACATTGCCAGGAACAAGAT
TCTGAAGAGACAGGATGCCCCTGCTGCTATAATGCAAGCGAATAAGCTAA
ATGACCCAGAAGCTGTCACAAGGAGGTCCAAACTGATGCTTCCTCCTCCC
CAAATATCTTATCTTGAGCTAGAGGAGATTGCAAAGACGGGTAATGCTGG
TGACCCTGGTTTTACTGAGGAGCTTGGTGAAGGACTTACTGCCACAAGAA
CTTTGCTTGGCAGCTATTCTCAGACTCCAAGGCTTGGTATGACACCATTG
CGAACTCCACAGCGAACTCCAGCTGGGAAGGGTGATGCAATTATGATGGA
GGCAGAAAATCTTGCGCGTCTTAGGGAATCACAAACACCTCTATTAGGAG
GCGACAATCCAGATCTTTATCCATCAGATTTTTCTGGTATTAAACCACGT
AAGAAGGAGATACAGAGTTCAAATACAATGGCAACGCCTTTGGCAAGCTT
TGGTCCTGGTGCTACTCCAAGGATTGGCATGACACCCTCCAGAGATGGAC
ATAACTTTGGTTTGACTCCAAAAGGAACTCCTTTCCATGACGAGCTTCGT
ATAAATGAAGAGGTGGAATTGCAGGATGGAACCAAACTTGAGCTTCGCAG
GCAAGCTGAACTTAGAAGAAGCTTACGATCTGGTTTTGCTTCTATTCCAC
AACCTAAGAATGACTACCAGATACTCATGCCGCATATCGCAGAAGATGAG
AAGGAAGAAGCAGACGAGAAAATTGAAGAGGACATGTCAGACAGGCTGGC
ACGAGAAAGGGCTGAGGAACAGGCTAGGCAGGAGGCATTGCTCAGAAAGA
GATCCAAAGTGTTGCAGAGGAGTTTGCCTAGGCCACCTACTGCTTCGGTA
GAGATTATCCGGCAATCTCTTATTAGAAGTGTAGAAAGCAGAAGTAGAAG
CACTTTTGTGCCTCCTATATCACTTGAACACGCAGATGAATTAATAAGTT
GGGAGCTCCTTAGGCTTCTTGAGCATGACAATGCAAAATATCCTCTCGAT
AAAAAAACTCAAAAAGAGAAAAAGAAAGGGAGCAAGCATCAGCAAAATGG
GGGACCTCTTGTCCCTGAAATTGATGATTTTGATGAGGATGAACTAAAAG
AGGCTGCTTCTGTAGTTGAAGACGAGATTCAATATCTCCGAGTGGCCATG
GGTCATGGAAATGGATTTTTTGATGACTTTGTGAAAGCACATGATGCATG
CCAGGAGGATCTTATGTTTTTTCTTACTAATAGTAGCTATGGTTTAGCTA
GTGTCGCTGGAAATGCTGATAAGATTTCGGCATTGCAAAATGAGTTTGAA
ATTGTGAAGAAGCTTATGGACGAGGAAGCTAAGAAGGCTTCTCGTCTTGA
GCAGAAGATTAAGCTTCTGACACAAGGATACCAGGCATGGGCTGGAAAAC
TCTGGTCACAGGTCCAAGATACGTTCAAGCAGATGGACACTGCATCAGCA
GAACTTGAATGCTTCGAAGAGCTGCAGAAACAGGAACACTTTGCTGCTTC
TTGTCGGATCTTAAATTTGACCGGGGAAGTGAATAAACAGAAAGCACTAG
AACGGACTCTCCAAAGCCGCTGTGGTGATCTGTTGTCTGGTTTCTAG
>Pgl_GLEAN_10015286 PgMYB105
ATGGGGAGGTCACCGTGCCGCTGCTGCCAAGACGGTGCCGACGTGAAGAA
AGGCCCGTGGACGGAGGAGGAGGACCGGGCACTGGTGGATTACATCCAGA
GGCACGGCGGGCACGCCGGCAGATGGCGCAACCTGACCAAGGCCGCCGGC
CTGAACCGCTGCGCCAAGAGCTGCCGCCTCCGGTGGATCAACTACCTCCG
CCCCGACATCAAACGCGGCAACTTCACCGACGATGAGGAGCGCCTCATCA
TTGGCCTCCACGCCCAACTCGGCAACAAGTGGTCGGCGATCGCAACGCAC
CTGGACGGCCGGACGGACAACGAGATCAAGAACTACTGGAACACGCACAT
CCGGAAGAAGCTGCTGCGCATGGGCGTCGACCCCGTCACGCACCAAGCAC
CAGCGGCTGCCCCCGGCGACGTCGTCGGCTCCACATCTGCCTCCGCAGCA
TTGTCGCCTCCGCCGCCGCCCCCGGCCTCCCAGAGGAGCTCCTCTCGGCG
GTGGCCAGCCTCGGAGGCCTCAACAGCGTCCTGA
>Pgl_GLEAN_10021819 PgMYB106
ATGAAGGAGCGACAGCGGTGGCGGCCTGAGGAAGACGCGGTGCTGCGGGC
GTACGTGCGGCAGTACGGCCCCCGGGAGTGGCACCTGGTGTCGCAGCGCA
TGAGCGTGGCCCTCGACCGCGACGCCAAGTCCTGCCTCGAGCGCTGGAAG
AACTACCTCCGCCCAGGGATCAAGAAGGGCTCCCTCACCGACGACGAGCA
GCGCCTCGTCATCCGCCTCCAGGCCAAGCACGGCAACAAGTGGAAGAAGA
TCGCCGCCGAGGTGCCCGGCCGGACCGCCAAGCGCCTCGGCAAGTGGTGG
GAGGTCTTCAAGGAGAAGCAGCAGCGGGAGCTCAGGGACAGCAGGAGGCC
GCCGCCGGAGCCCAGCCCCGACGAGCGCGGGAGGTACGAGTGGCTGCTCG
AGAACATCGCGGAGAAGCTCGTCGGCGAGAGGCCGCCNNNNNNNNNNNNN
NNNNNNNNNNNNNNNNNNNNNNNNNNNNNNNNNNNNNNNNNNNNNNNNNN
NNNNNNNNNNNNNNNNNNNNNNNNNNNNNNNNNNNNNNNNNNNNNNNNNN
NNNNNNNNNNNNNNNNNNNNNNNNNNNNNNNNNNNNNNNNNNNNNNNNNN
NNNNNNNNNNNNNNNNNNNNNNNNNNNNNNNNNNNNNNNNNNNNNNNNNN
NNNNNNNNNNNNNNNNNNNNNNNNNNNNNNNNNNNNNNNNNNNNNNNNNN
NNNNNNNNNNNNNNNNNNNNNNNNNNNNNNNNNNNNNNNNNNNNNNNNNN
NNNNNNNNNNNNNNNNNNNNNNNNNNNNNNNNNNNNNNNNNNNNNNNNNN
NNNNNNNNNNNNNNNNNNNNNNNNNNNNNNNNNNNNNNNNNNNNNNNNNN
NNNNNNNNNNNNNNNNNNNNNNNNNNNNNNNNNNNNNNNNNNNNNNNNNN
NNNNNNNNNNNNNNNNNNNNNNNNNNNNNNNNNNNNNNNNNNNNNNNNNN
NNNNNNNNNNNNGGTCGCCGAGCTCCGCCGCGACGCGCAGCTCAAGGAGG
AGAAGATGGCCGAGCAGTGGGCCGCCAAGCACGCCCGCGTCGCCAAGTTC
ATCGAGCAGCTCGGATGCTCCCGCCCATGGTCCGCCCCCAGCGACATGAA
CTGA
>Pgl_GLEAN_10007729 PgMYB107
ATGGTGACAGTGAGAGAAGAGACTCGCAAGGGGCCTTGGACAGAGCAGGA
GGACCTGCAACTGGTATGCACTGTCCGTCTGTTCGGTGAACGTCGTTGGG
ATTTCATTGCCAAAGTATCAGGGCTCAACCGAACAGGCAAGAGCTGCCGC
CTGCGCTGGGTCAACTACCTTCATCCTGGCCTCAAGCGTGGGCGCATGTC
TCCCCACGAAGAGCGCCTCATCCTCGAGCTTCATGCTAGATGGGGAAACA
GGTGGTCCAGGATTGCGCGCCGCTTGCCAGGGCGCACTGACAATGAGATC
AAGAACTACTGGAGGACACACATGAGGAAGAAAGCACAGGAGAGGAAGAG
GAACATGTCCCCATCATCATCCTCATCTTCACTGACTTACCAGTCCTGCT
ACCCGGACACTCCCTCAACCATTGGAGTTGAGGGGCAGGAGCTTCATGGG
GGCAGTGGCTGCATCACAAGCATCATGAAGGGCACCCCTCCAGACATGGA
TGTATATCCCATGGACCAGATATGGATGGAAATTGAGGCACCTGATGTGC
CCTCAAGCATGGGCCTTGATGGAGGGAGCGAAAATGCATGCAGCAGCCTT
GCCGCCCCTCTGTTGCCACCTGCAGCATGGGATTACTACCCAGAGTCTGG
CTGGAAGATGGATGATGAGATCAAGATGGCACCACAATTCAGTTACAGTG
AAGGAGTTGGCCCCTGCTTTTGA
>Pgl_GLEAN_10026254 PgMYB108
ATGGCTTCCGGTGGGCAACCGCAGTTCTGGTACATGCAGCCGCCGTCGAA
GGTGCTTCACCTGCGGAACCTGCCGTGGGACTGCACACCGGAGTTGGTCG
AGCTGGGGACCCCCTTCGGCAAGGATCTTAAGAAGTATAAGCTCGGGGAC
CCATCTTCATTTCACTATCTCAACCAATCAGCTTGCATTAAAGTTGATGG
AATCAATGATACTGAGGAATATCTTGTAACAAGAAAAGCAATGGATAATG
TTGGCATCACTGAACAAGAGCAGGTTCAAAATTCCTCCTCTTTAAGTTCA
GTAACGAATTGTTCTTCCAATGTGGATGTAGGATCTGTGCATCAAACATG
GCGGCATCCCCGCCCGGCGCTCCTGTCGAGCTCGACGACGACCACGGCGG
CCTCCACGGAGGGGCGCCGCCGGAGGAGGCGGAGCAGCTGGACCTTGGAC
CTCCGCCGCGGCCCGTGGACCGTCGACGAGGACCTCACCCTCGTCAACTA
CATCGCCGACCACGGCGAGGGCCGCTGGAACTCCCTCGCCCGCGCCGCCG
GGCTGAAGCGGACGGGCAAGAGCTGCCGGCTCCGGTGGCTGAACTACCTC
CGGCCCGACGTGAAGCGCGGCAACTTCACCGCCGACGAGCAGCTGCTCAT
CCTCGACCTCCACACCCGCTGGGGCAACCGGTGGTCGAAGATCGCGCAGC
ACCTGCCGGGGAGGACGGACAACGAGATCAAGAACTACTGGAGGACCCGG
GTGCAGAAGCACGCCAAGCAGCTCAACTGCGACGCCAACAGCAAGCGCTT
CAAGGACGCCATGCGCTACCTCTGGATGCCGCACCTCGTCGACGCCGCCG
CCGCCGACGACCACCACCGACGCCGCCTCCTCCACCACACCCACCAGATC
CATCCACTTCAACGCGACCTAACCCTAATTGGAAGACACGTGGTGGAGAC
GGCGGCGAACCAAGGGCTGTGGACGGCGGCGGCCGATCATCAGTCGTCGG
CGGCGGCGGTGCAGGCTGCCGCTGTTGGTGGTGGTTGCCAGCAGTTTCAG
GACCCGGAGCTGAGTGGATGGGTGCAAGGCTTCTCCGAGGGCGGTATTAC
TGAGAATTTTTGGGCCTTGGAGGACATCTGGAAGATCCAATGA
>Pgl_GLEAN_10025439 PgMYB109
ATGAGGAAGCCGGAGGGCCCAGCGGCGGCGAGCGGCGTCTACAATGGCGG
AGCGGTGGCAGCGGCGAAGCTGCGGAAGGGGCTGTGGTCGCCGGAGGAGG
ACGAGAAGCTGGTGGCGTACATGCTGCGGAGCGGGCAGGGGTCGTGGAGC
GACGTGGCCCGGAACGCCGGCCTGCAGCGCTGCGGCAAGAGCTGCCGCCT
CCGGTGGATCAACTACCTCCGGCCGGACCTCAAGCGCGGCGCCTTCTCGC
CGCAGGAGGAGGACCTCATCGTCAGCCTCCACGCCATCCTCGGCAACAGG
TGGTCTCAGATCGCTGCCCGGCTGCCGGGGCGCACCGACAACGAGATCAA
GAACTTCTGGAACTCCACCATCAAGAAGCGCCTCAAGATTAACAGCTCCT
CGGCCTCGTCGCCGGCGACGGCCACCGACGACTGCGCGTCGCCGCCGGAG
CCCAGCAGTAGCAAGGTCGCCGGCGGCATCGACATCAGCGGCGCCGCCAG
CTGCCCGGACCTCGCTGGCCTGGACCATCATTACCATCATCAGGACGGCA
GCGTCCACCACCACGCGATGTTGACGACGGGCTTGTGGATGGTGGACTCG
TCCTCCTCCACCTCCTCGTCGACCTCGCCCATGCAGAGCCGGCCGCCNNN
NNNNNNNNNNNNNNNNNNNNNNNNNNNNNNNNNNNNNNNNNNNNNNNNNN
NNNNNNNNNNNNNNNNNNNNNNNNNNNNNNNNNNNNNNNNNNNCCGCGGC
GGCACGGCGGCGGCCGACACGTCGCCGCCGGCAGGGTTCTTCCACGGCCA
CCACCCGGCGCCGTTCAAGCACCAAGCAGCAGCTCTTGCCTCATTGCACG
GCGGCGGCGGTTACTATGGAAATGGAATGAGCACTCCTCATCACCATGGG
ATGACGATGGCAACGGAGGGAGGAGGAGGATGCTTCATGAGAGGAGAAGG
CCTCTTTGGTGTGCCTCCTCTGCTGGATGCCATGTCAGCACAAGACCAGC
AGGAAGCAGGCCAGCAGGCCCTAATGGCACCGAGTGGTGGTGGTAACAGC
AACCCTAAAAACCACAGCATCAGCAACAACACCACTGAGACTGCCACTAC
CACAACCACAACAACAGTGAGTAACAATGAGAGCAACATCACAGACAACA
CAACCAAGGATAACAAGAACATCAACACCATGAGCCTGGTGAACAGCAGT
GTGGCTGCTGCGGCCGTCTACTGGGAGGGGGCCCACCAGCAGTACATGAG
CAGGAATGCCATGCATGGGGAGTGGGACCTGGAGGAGCTGATGAAAGATG
TGTCATCCTTGCCTTTCCTTGATTTCCAAGTCGAATGA
>Pgl_GLEAN_10030874 PgMYB110
ATGCCTCAAGATTCGCGCCCAGCCGGGATGCGCCTCTTCGGCGTCACCAT
CGCGCCGGCGCCACCNNNNNNNNNNNNNNNNNNNNAGGCGGATCCGCCGG
ACCGGGATCCGAGCCCCAACCCGCCCATGGCGGTCAGGGAGGACGTGATG
CGCAAGTGCAAGAGCATGGGCAACCTCGCCGCACTTGGCGCTGGCGCGGA
CGCTGGAGGAGCTGGCGCTGACGGCGGAGGCGCCGGCGACGGCTACCTCT
CCGATGGCGGGCTGATGCAGTCCTCCGGGAAGCGGCGGAGGGCGCAGGAG
AGGAAGAAAGCTGTTCCTTGGACTGAAGAAGAGCATAGGACATTTCTTGC
TGGTCTTGAAAAGCTAGGGAAGGGAGACTGGAGGGGTATAGCAAAAAACT
TTGTTACTACCAGAACACCAACTCAAGTGGCAAGTCATGCTCAGAAATAT
TTTCTTAGACAGACTAATCCAAACAAGAAGAAGCGCAGATCTAGTCTTTT
TGACATGATGCCTAGCGAACTGTCACCAGTACCAAATTGCCCCATCTTAC
CACCATCTATGACAAAAGTACATGATGTGGTAGCTATGACAAGACAACTC
CAAAATAGCAACTTGGAAGGAGGCTCATCTTCAAACGCAGCTAATATAGC
ACCTCAAGTTGGAAGAGATCTTCCCCCAGTTCCGTCTTTCAGGGCAACGA
ATATGGATTCAAGTTTCAGCAAACTGAACCGCATGGAACCCTTCTGGAGA
ACACCATATCCATTCAGACCAATTCCAAAGGCCCCTGACGGGACATCTTC
ATCAACTTCTGTTGCTACCAATATAGCTACTCCGGTTGCCAAAGCTAACC
CGACTGCATGTACTAGCACATTCTTGAGCCTGCGAAGTGATACTTCGCCA
TTGCCTCCAAAGGCAGATTCTCCAGCAGAGACGAAGGATTTGGAACTGAC
TGTTGCTCCACCCTCCCAACAAAATATGACCAATATGTCTTCCCAGAATG
CGGTAGGCGTGATTCAAGTCATCTAA
>Pgl_GLEAN_10030875 PgMYB111
ATGGGGCATCACTCCTGCTGCAACCAGCAGAAGGTGAAGAGGGGGCTCTG
GTCTCCTGAGGAAGATGAGAAGCTCATCAGATACATCACCACCCATGGCT
ACGGGTGCTGGAGCGAGGTCCCGGAGAAAGCCGGTCTGCAGCGGTGTGGG
AAGAGCTGCCGGTTGCGATGGATCAACTACCTCAGACCGGACATCCGGCG
AGGGCGGTTCACGGCGGAGGAGGAGAAGCTGATCATCAGCCTCCACGCCA
TTGTTGGCAACAGGTGGGCTCACATTGCCAGCCACTTGCCTGGCCGGACG
GACAACGAGATCAAGAACTACTGGAATTCATGGATCAAGAAGAAGATCCG
TAAACCGGCGGTGAGCACGACGACGACGACGACGAGCTCGTCGCTGACGG
CGGCGACGAGCCCCCCGTGCAGCACGGCGGCGTCGGAGGCGCTGGCGCTT
GGTCACCTGCAGACGCCGTTCAGCGCGGTGGCGGAGCAGCAGCTCGACGC
CCTCATCAGCCAGAGCTGCCTAGCGCTACCGCCGAAGCTGGCCGGCGGCC
AAGACTCCCCGCCGGCGCCGGCGCTGCCCCCGCACTGCCCCTTCTTCATG
TTCGACACCAGCAGCGTCAGCCCACCGTCGTCGCTGACGTCGCCGGTGGC
CCAGCTGGTGCAGCAGCACCCGTTCCTCACCTTCACGGCGGCGGCCATGG
ACGGGCCCGGCTACCAGCTGCCTCCCCTGATCGACGGCATGGGCATGGGC
ATGACGACAGCCATGGATTGCGGCTTGGGGGGTGAGGAAAGTAGAGGCAA
CAATGACCAATCGACGGCGGCAGCCATGGCAAACGGCGGCGGCGGCTGGC
AGCAGCAGAAGCAGGAGGAGGAAGAGCAGCTAGGGCATGACCAGTGGGAC
GACGAGTCAGCTCAACACCTGCTGATGTGGGACGATGACCAAGAACTAAC
ACCGTCCAACCTGGAAGCCATGGAAAGTGGTGCTCACTCCCTCCTTTTTA
TGGGACCAAATGACCATGCATGA
>Pgl_GLEAN_10027372 PgMYB112
ATGTCTGGGGAGACCGTGATTCCATTCGGTTGCCTGTGGGGTGATTTAGG
AGGTGAGGCATGGACTGAAGAGGAGCACAAAAAGTTTCTACTTGGGTTGA
ATAAGTTGGGGAAGGGTGATTGGCGAGGTATATCCCGTAATTACGTTATT
TCGAGGACTCCTACTCAAGTTGCTAGCCATGCACAGAAGTATTTCAATCG
CCAAACAAATGTGCATAGAAGAAAGAGAAGATTGAGCCTCTTCGATATGG
TGATTGATGATTCTTCTGATCAGCTGCCGCTCTCGCGTTCATCTTCACAA
GAAGTAGAACAGCATTTAGATGATCCACAGCCTGTTGCGGCCCTTCCTGC
CCCTGTGGTCTCTACTGCTGCTGTGGCACCTCCTCCTGTGTCAGTGGAAG
CGCCCGCTTCAATTCCACCACCAGTTCAAGTTCCTCCAGAAGTTACACCT
CAGCTTATGGAACAGGACTCAGTTCCCTCAAGTTCAACTGCTGGAGAAGC
AGGGGTGGTGATGCCAGAAGGCATGCCGCCCTATCTTTATCCAATGATGA
TTCCTTACCAGCCAGCATTTGTTCCAGTACCATGCTATGGTTATGTTCCT
ATTTACTATGCGCCACCAGGTGCATCACAAGCTCCACATCAGGTAGTCAA
GCCTGTGGCTGTGCATTCAGCGCCTCCATTAAACGTCAAAGATCTCTACA
ATATGTCAGAACTGAGCCTGAAGGGTGATGACTCAAATGCAAACAGCGGA
GTGCCTGCTTCCCCCTTGCCTCCAAAGCCCATTGGTAGACCAGGGAGGCA
ATCTGCTTTCCATGGCAAAGGGCCTTCAGGTGGCTCATCTGGTGAACTAA
TTCCTGCAGTCAAGTGA
>Pgl_GLEAN_10023931 PgMYB113
ATGGATTCGATGAGTTGGGGGCTGGCGGAGGACGATGTTGTGGTGGGGAT
GGGGAGGAGAGTAACGGCAACTGGATCAATTCAAATGGAGGTTAATTCCT
CTGGTGAGGAAACGGTGGTGAAGGTGAGAAAGCCGTACACAATAACAAAG
CAGCGGGAGCGGTGGACTGAGGCAGAGCACAAACGGTTCCTTGAAGCCTT
GAAACTTTATGGCAGAGCGTGGCAGCGCATAGAGGAGCATGTTGGGACAA
AGACGGCTGTGCAGATCAGAAGTCACGCTCAGAAGTTCTTCACCAAGTTG
GAAAAGGAAGCTATGAACAACGGGACTTCTCCAGGGCAAACTCATGACAT
TGACATACCTCCACCACGGCCTAAAAGGAAGCCTAACAGTCCATATCCTC
GAAAAAATGGTCTCAGCTCTGAAACACCAACGAAGGAACTTCCAAATGAC
AAGTCATCAAAATCAAATATTACACTGAGTAATGGCAATGTACAATTGGT
AGGCGATACGTCTCTGCAGAAATTTAAGAGGAAAGAGGTGTCTGAAAAAG
GAAGTTGCTCGGAAGTTCTTAATCTCTTCCGAGATGCCCCATCTGCATCA
TTTTCTTCAGTTAACAAAAGCTCTTCGACTAATAATGTACCCAGTGAACC
AACCAAAACAGAAATCCGAGATATGACTACCAAGGAAAAGAATTCCAGTA
ATCCCACCATGCAAGAGGATGATGTAAAAGAGATCAATGTTCCAGAAATT
GGAAGGGTTAATGGAATCCACTTCAGCTCTAAATGTGACCGTTCTAATGA
AGAATATTTGGACTTCTCAATGCAACAAATGAAGCTAAAACCAAAGTCTT
CGGAGACAACATACGAGGACAAACAAACTGCAAGGACTTCACACTCCGTG
GTGGAGAGAAATGGTGCAACTAGCATTCCTGTCACTGGAACTGAAGGAAC
TCGTCCTGATCAAACAGGCGATCAAGTAGGAGTCAATGGAAATATGAACC
CATGCATCCATCCAACGCTTTCAACGGATCCAAAATTTGATAGCAGTGCC
ACACCACAACCTTTTCCTCATAACTATGCTGCCTTTGCTCCAATGATGCA
GTGCAACTGCAACCAAGATACCTACAGGTCACTGGTGAACATGTCATCCA
CTTTCTCCAGCATGCTTGTTTCCACATTGTTGTCAAACCCTACCATCCAT
GCAGCCGCTAGGCTCGCAGCATCGTACTGGCCAGCAGTAGAAGGTAACAC
TTCTGTTGATCCAACTCAAGAAAATCCTGCAGAGGGTGTTCAAGGAAGGA
ACTTAGGCTGTCCTCCAAGCATGGCTTCTATCGTAGCAGCTACAGTTGCT
GCAGCATCCGCATGGTGGGCAACACAAGGTCTTCTCCCTTTTTTCACTCC
CCCCATGGCTTTTCCATTTGTACCAGCTCCTAGTGCTGCCTTTCCCACAA
CAGATGTTCCGCAACCTTTAGACAGAGACAGAGATTCCCCGGTTGAAATT
GCACAAAAGGGATGCCAGGAGGCTCAGAAACAAGGCCAGTCTGAAGTTCT
GAGAATTGCTGTGTCTTCGGAGACTGATGGGACTAGAAAAGGCGACATGT
CTCTTCATACTGAGTTAAAGATATCTCCTGTCCAGAATGCTGATGCCGCG
CCTACTACAGGAGCTGACATGAGTGATGCATTCAGGAATAAGAAAAAGCA
GGATCGCTCTTCATGTGGATCTAACACACCATCAAGTAGCGATGTAGATG
CAGGAAATGTTCCTGAGAAAGAAGATAAGGATAATGACAAGGCGAAGCAA
GCCTCCTGCAGTAACTCTTCAGCTGGTGACACTAACCACCGCAGATTTAG
AAGCAGTGGAAGCACAAGTGATTCATGGAAGGAAGTTTCCGAAGAGGGTC
GTATGGCTTTCCATGCGCTGTTCAGTAGAGAAAAGCTTCCACAAAGTTTT
TCTCCCCCACAGGCAGAAGAATCAAAGGAGGTTGCCCAGGAGGAGGAAGA
TGAAGTGACCACAGTGACGGTTGACCTCAACAAGAATGCCACAACAATTG
ATCATGAGGTTGACATGATGGATGAGCCAAAATCTTCCTTCCCCAATGAA
CTGTCACACCTGAAGCTTAAATCACGCAAAACAGGCTTCAAACCATACAA
GAGATGTTCAGTGGAAGCAAAGGAGAATAGGGTGCCGGCTAGCGACGAGG
TTGGTACCAAGAGGATTCGTCTTGAGAGCGAAGCATCAACCTGA
>Pgl_GLEAN_10031352 PgMYB114
ATGGGGAGAGCACCCTGCTGCGACAAGGCGACGGTGAAGAAGGGGCCATG
GTCGCCGGAGGAGGACGCAATGCTCAAGAACTACATCGAGGAGCATGGCA
CTGGGGGCAACTGGATCGCGCTGCCACACAAGATTGGGCTGAAGAGGTGT
GGCAAGAGCTGCAGGCTGAGGTGGCTCAACTACCTGAGGCCAAACATCAA
GCATGGGGACTTCACCCCTGAGGAGGACAGCGTCATCTGCAGCCTCTACA
TTAGCATAGGGAGCAGGTGGTCAATCATCGCCGCGCAGCTGCCGGGGAGG
ACTGACAACGACGTCAAGAACTACTGGAACACCAAGCTGAAGAAGAGGCT
CCTCGGCCGCCGCAAGGACCGCCACCACCAGAGCGCAGCCGCCGCCGCCG
CGACGACCGAGATGTCCACCGAGAGCGCGAACGACGGCGGCGAGCGGGCG
CTGAGCGCGTCGGCGATGGAGCGGATCCAGCTCTGCATGCAGCTGCAGGA
GCTTCATCAGAACCCGCTCGTCGGCGGCGGCGCAGCACACCACCACAACC
CGGCCCCCGTGGCGTGGCCATCAGCTGCTGCCGCCGGCACCCTGAGCAAC
AACAGCAGCTTCAACAGCAACAGCAGCAGCGTGACGGTGGCCGAACACGG
GCCGTCCAGCTCCATGATGAACGAGCACCTGATGATGAGTGCGCAGCTGG
AGGGCGGCGGCGCTGCTGCGGCGGCCATGGACGGCCTCGGCTCGCCGTCG
AGCGCGGGGAACTCGAACGTGATCAGCATGGAGGCCGAGCTCGAAGAGCT
GCTCTACGGAGAGGGGAACTACCAAGGGAAGGGCGGCGCCGACGCGGTCG
ACGGCGGCGGTGTGCCGCAGCAAGGGGACGTGGATTGGTGGAGCTACGAC
CAGGGGAAGCTACCTGTGGGTTCCTGGGACTTCGCCGCGGAAGCGAACGC
AGTGTTCCAGGACTACACATCTGTTTATGACATTTGA
>Pgl_GLEAN_10035466 PgMYB115
ATGGGGAGGGCTCCGTGCTGCGACAAGAACAACGTGAAGAAAGGGCCATG
GTCTCCTGAGGAGGATGCCAAGCTCAAGGAGTTCATCGAGAAGCACGGAA
CTGGAGGGAATTGGATTGCTCTCCCCCAAAAAGCAGGGTTGAGGAGATGT
GGCAAGAGCTGTAGGCTTAGATGGCTAAACTACCTGAGGCCTAACATTAA
GCATGGGGAGTTCACGGAGCATGAAGACAGGGTCATCTGCAGCATGTATG
CAAGTATAGGAAGCAGGTGGTCGATTATCGCGTCGCAGCTCCCCGGCCGC
ACAGACAATGACATCAAGAACTACTGGAACACCAAACTGAAGAAGAAGCT
CCTAGGCTCCACAGCTGCCCCACCCCCTCACCGTGTGCCTCGACAACATC
ACCGGTCCCTGAATCTCATGCTTCAACACACATCTCTCTCACTACCCCAA
CCCACCTACAACAGCTTCTTTTCTGGCGCCGGAGTCCTCCACGACCCCAT
CAGCATCCCTGCACTAAACCTGTCGCCAACCCAGGACTACATGCTAAACT
CGAGCGTCGCCATGGAAAACGCCCCTTCGCTGCTGCAAGGGCACGGCGCT
ACACAGCAACAGTTCCACCACCATGTGGTCAAGGAGGAGAGCGGCAGCAT
GATCGTATTCGGCAGCGACCAGCAGAGTTGCAGCTCGTCGGACGGCGCGC
ACAGCCAACCGCAGTTCGGGCACGGCAAGGAGCTGCGCTTCGACAGCTAC
TTCGGGTACAACAATGGCAGCATCGAGCATGACCACAGGCTGCTCCAACT
CCAAGACCACCATCACCAGGCCGAGGCACCCGTCGAGTACAACTACGAGG
AGATCAAGCAGCTGCTCATGAGTTCAACCACCGGTAACTTGCACGGCCAT
GGCCAGGACGGCGGCATGGAAGGGTTCGGCTCGCAAGGGAAGGTGACGAT
GATGTAA
>Pgl_GLEAN_10011393 PgMYB116
ATGAAGCAGCGCAGTGGCAGCGGAGAGCAGGCGGCGGTGAGGAAGGGGCC
GTGGACGGCGGAGGAGGACGAGGTGCTGCTGCGGCACGTCCGGGAGCACG
GGCCCCGGGAGTGGAGCTCCATTCGATCCAAAGGCCTCCTGCCGCGCACT
GGCAAGTCCTGCCGCCTCCGGTGGGTCAACAAGCTCCGGCCGGACCTCAA
GACGGGTTGCAGGTTCTCCGCGGAGGAAGAGCGCGTGGTGCTCGAGCTGC
AGGCGCAGTTCGGGAACAGATGGGCCAGGATCGCGACGTACCTGCCCGGC
CGGACGGACAACGATGTCAAGAACTTCTGGAGCACGCGGCAGAAGCGGCT
GGCGAGGCTCCTCCGGGCGCCGATGCCCCGCCGGAGGCCCGGCAAGCAGA
GCTCCGGCGCTTCTTCCTCCCATGCCTACGACTACAAGTTGCCGGCGCCC
AAGAATCCGTGCTTGGAGATGATCCCCTTCCAGGAGACGGCGGCTCACCA
CATCGGCGAGGGAAGCAGCAGCAGCAGCAGCCGAGAGCCGAACGCGGCGA
GCCAGCACGCCGGCCCGCATTTCCCCATGTCGTACTGCCTGCCGCCGCCT
CCCATCCCGCTACCCATCATGTACGCCGGAGCCGAAGGCGGCTCGTCCGG
CGCCGCCGCTCCGACTCCAACGACGGCTCTCCTGCTGCCCTACGGCAGCG
GGACCAGGAGCCCTGTCAACGGCGTTGACCCGCTGGTGTTCCTCGACCCC
GCCGATTCCCCGGAGCCGCTGGAAGTGGTGCCGCCGGGCCAGTTCTTCGA
TCTCGACGACGTCTACGTGCACGCCGGCCGCGCGCCGGATCGGGATATGT
TTGGGGTGCGCTTCGACGACCTCCCGCCGGAGACGTTCGACTTCTTCGAG
CTCCCGCACATGCCGGCGTTCCCACCACCGCCTCCCTCGCCATCCGAGGT
GACTGGTAGCAGCCTGAGCTGA
>Pgl_GLEAN_10030833 PgMYB117
ATGGGGATCATGATAAAGGGCGGTGTGTGGAAGAACACGGAGGACGAGAT
CATCAAGGCGGCCGTCATGAAGTACGGCAAGAACCAGTGGGCGCGCATCT
CGTCGCTGGTCGGCCGCAAGTCCGCCAAGCAGTGCAAGGCGCGGTGGCAC
GAGTGGCTCGACCCATCCATCAAGAAGACTGAATGGACAAGGGAAGAGGA
TGAGAGACTGCTCCATCTTGCTAAACTCATGTTTACACAATGGAGTGCAA
TTGCACCTATTGTTGGCCGGACACCATCTCAGTGCCTTGAGCGTTATGAG
AAACTGCTTGACTATGGTGCCTGTGCAAAAGATGAGAATTATGAACCTAA
TGAAGACCCAAGGAAATTGCGACCTGGTGAAAATGATCCAAATCCCGAGT
CAAAATCTGCTGGTCCTGATCCTGTCGATATGGATGAAGATGAAAAGGAG
ATGCTTTGTGGATATGGATGA
>Pgl_GLEAN_10010676 PgMYB118
ATGGGGAGATCTCCTTGCTGCGACGAGAGCGGCCTCAAGAAGGGCCCCTG
GACGCCGGAGGAGGACGAGAAGCTGCTTCAGTACATCCAGAAGAACGGCC
ATGGCAGCTGGAGGACCCTCCCAAGGCTCGCCGGGCTGAACAGATGCGGC
AAGAGCTGCCGGCTGCGGTGGACCAACTACCTCCGGCCGGACATCAAGCG
GGGCAAGTTCTCGCAGGAGGAGGAGCAGACCATCCTGCACCTCCACTCCG
TGCTCGGCAACAAGTGGTCGTCGATCGCGGCGCACCTGCCGGGCCGGACG
GACAACGAGATCAAGAACTTCTGGAACACGCACCTCAAGAAGCGCCTCAT
CCAGATGGGCTTCGACCCCATGACGCACCGCCCGCGGACCGACTTCTTCG
CCGCGCTGCCGCAGCTCATCGCGCTCGCCGCGCTNNNNNNNNNNNNNNNN
NNNNNNNNNNNNNNNNNNNNNNNNNNNNNNNNNNNNNNNNNNNNNNNNNN
NNNNNNNNNNNNNNNNNNNNNNNNNNNNNNNNNNNNNNNNNNNNNNNNNN
NNNNNNNNNNNNNNNNNNNNNNNNNNNNNNNNNNNNNNNNNNNNNNNNNN
NNNNNNNNNNNNNNNNNNNNNNNNNNNNNNNNNNNNNNNNNGGCTGCGGC
TCTCGGCGGCCTCTGCTCGCCGCAGGGGACGCACGACGACAGTACTACTG
ACCCGCCGGTGTCCGAGGCCGGCGGCCAGCTACTACTTCCTCCTTGCACG
TTCCCCGAGGCACCCGTTAGTAGTGAAGGCAACCAAGGCATCAGCTACGG
CGGCGGCGCTGATGTTGACGTGTTCGCGTGCCACGACGGTGGCTCGCTAC
CGCCCCTGACCGACCTCTCCGACGCCGCGAACTACCCGTCAGCCGGCGGG
TGCAGCGCCACGGCGTCATCCATCAGCTTCAGTGGCGGCACGAGCAGCCC
GCTCCCTTGGCCGGAGTTCTTCCCCGACGACCCCTTCATCACTGATTTCT
TATGA
>Pgl_GLEAN_10037578 PgMYB119
ATGCCATCCTCGTCGTCGACGAACACATCAGATGGCACCAAGTCATCATC
GTGTCCGAGAGGCCACTGGCGTCCTGGGGAGGACGATAAGCTGAGGCAGC
TGGTCGATAAGTACGGGCCGCAGAACTGGAACTCCATTGCTGAGAAGCTG
GAAGGGAGATCAGGCAAGAGCTGCCGGCTCCGGTGGTTCAACCAGCTGGA
CCCTCGGATCAACAAGCGACCGTTCACGGAGGAGGAGGAGGAGCGGCTGC
TCAACGCCCACCGCGCCCACGGCAACAAGTGGGCCCTCATCGCCCGCCTC
TTCCCCGGCCGCACCGACAACGCCGTCAAGAACCACTGGCACGTCGTCAT
GGCGCGCCGGAGCCGCGAGCGCTCCAGGATCCTTGCCAGGGCCGCAACCT
CGCCGTCCACGGCTTACGTCTTCGGCGCTGGCACGACGGCGGCGAGCTCA
TCGCTCTGCTTCAGCTTCTCCAAGCTCGGGGGCGGCGGCGGCGACGGCGG
CATGTTCAGCTCGCCGCCGGCTGCTCGTCCTACATCACTGTTCAAGAGCT
TTGGCACAACTACTAGTAGTAAGAGCTTTCTGGGGGCGAGCTTCGAGGCG
GCGAGGTACAGCTACAGCGGCAGGCAGGTGCTGCCGCCTGTCTCCATCAC
CTTCTCCTCTCCAAGAGAAGCTCTGGCCATGGATATCGGCCGCCATGAGC
ACGTGCACGGCCAGAAGGATTACTATGCCAGCGATGGTGGCGGCGATGAG
GCGCTGAAGAGAAAGGATGTGCCCTTCATCGACTTCCTCGGCGTCGGTGT
TCCCTCGTAA
>Pgl_GLEAN_10034301 PgMYB120
ATGGGGCGGTCGCCGTGCTGCGAGAAGGCGCACACGAACAAGGGCGCGTG
GACCAAGGAAGAAGACGACCGCCTCGTCGCCTACATCAAGGCCCACGGCG
AGGGTTGCTGGCGCTCCCTCCCGAAGGCCGCGGGGCTCCTCCGCTGCGGC
AAGAGCTGCCGCCTCCGCTGGATCAACTACCTCCGCCCGGACCTCAAGCG
CGGCAACTTCACGCCCGACGAGGACGACCTCATCGTCAGCCTCCACAGCC
TCCTCGGCAACAAGTGGTCCCTCATCGCCGCGCGCCTCCCCGGCCGCACC
GACAACGAGATCAAGAACTACTGGAACACGCACGTCCGACGGAAGCTCCT
CGCCAGGGGGATCGACCCCGTCACGCACCGCCCCATCGCCGACGGTGCCG
GTGCCGGCGGCGGCGTCACCACCATCTCCTTCCACCCGCAGCAGCAGCAG
AAGCAGGTCAAGCTCAAGCCGCCGCCGCCGCCACCCAGGTGCCCCGACCT
CAACCTCGACCTCTGCATCAGCCCGCCGTGCCACCAGCAGGAAGAAGAAG
AAGAAGACGAACATCAAAATCAGCTGGAGCTGGAGGTGGAGCTCATCAAG
CCCGTCGCCGCCGTCGTCAAGCGAGAGGTGCTGCACGCCAGCCACGGCGG
CGGAGGAGCAGGAGGACTCTGCTTCGGCTGCAGCCTGGGCCTCCAGAAGG
GAGCCCCCGGGTGCAGCTGCAGCGACAGCCACTTCCTGGGGCTCAGGGCC
GGCATGCTCGACTTCAGAGGCCTCGAGATGAAGTGA
>Pgl_GLEAN_10034291 PgMYB121
ATGGGGAGGCAGCCCTGCTGTGACAAGCTGGGGGTGAAGCGGGGGCCGTG
GACAGCAGAGGAGGACAAGAAGCTCATCAGCTTCATCCTGACACACGGCC
GATGCTGCTGGCGGGCAGTGCCTAAATTGGCAGGGCTTCTACGCTGCGGC
AAGAGCTGCCGGCTGCGGTGGACTAACTACCTCCGTCCTGACCTCAAGCG
CGGCCTCCTCAGCACTGCCGAGGAGCAGCTCGTCATTGAGCTCCATGCCA
AGCTTGGAAATAGATGGTCCAAGATTGCTGCCAGGTTACCTGGGAGAACG
GACAATGAGATCAAGAACCACTGGAACACACACATCAAGAAGAAGCTCAT
GAAGATGGGCATCGACCCAGCCACTCACCAGCCTCTGGCCAACTCCAAAA
TGACTACTTCACAATCAAATGATACAGCTGAATCGTCAAAATCCAGCAAC
ACCAGAGACAAGCCAAGCGCGAAGGAAGGTAACCATAGGGACGTGGCACT
CCCCACTGACTCGCCAGAGCAGTCCAGCTGGCTGGAGTCTGGAAACCATT
CCAGCGGTCAAGACCAGGAACAACTGGCGAATTGGCTTGCGGAGACGGAT
CTGCCCATGGATGAGGCGTGGTTGAATTTTACTGGCAGCAACGATGATGT
GCTTGGCATCGCAGAGGGGCCGTTGCCATGGGAGGGAGCAACAGATTGGC
TGCTTGACTACCAAGATCTTGGCATGAGCAGCTCGAACTTGATCGGCAAT
AGTTCAACGCTTGGCAGCTCAGATGGATCAAACTTTTGA
>Pgl_GLEAN_10015816 PgMYB122
ATGGTTTGTAAGGAAGGAGGTGAACCATACATGAAGAAAGGGCACTGGTC
GCCTGATGAAGACGAGAGGCTTTACAGATGGATCACAAATTGTGGTGTTG
GAACATGGTCCTCCGTCGCCGAATTAGCAGGGCTGCAGAGGAGCGGAAAG
AGTTGCAGGCTCAGATGGATGAACTACTTGCGACCAGACCTCAGCAATCA
GCCTATCTCTAAGCAGGAAGAGGATCCCATTGTATCGTTGCAGAAAGTCA
TGGGAAATAGGTGGTCTGCGATTGCAGCTAGGATGCCTGGAAGGACTGAT
AATGAAATCAAGAACTACTGGAATGCACGCATCAGAAAGAAGATCAGGAA
AACTGCTGCTAAAGCCCACATTTCAACGGAGATCTGTCAAAATGAGCACA
ATAAGAACTTCACAAGTCAGGCACATCCTCATCTTCCAACTTTTGCTTGT
CAACCGTCATCCCATTCTGATCCTAATTGCGCAGAACAGAATAAAGCCGA
GGAAAGTGAACAGCTGACACAGAACACACCGATTCACGAGAGCAACAAGT
TTAACTTAGTTGATGAGTATGTCAACTTCCTCATGTCTCTCCCAGATGTT
GTGCCAGACATATACACATGGAACTGA
>Pgl_GLEAN_10018451 PgMYB123
ATGGAGACAGGTTCATTGGAATCAAATGGATATCACCCTTCGCATACTCG
TGATGCGGAACTCTGCGCACGAATGGTAAGCATGAGCAACACAATAAAAG
ACCCCGCGCTCGACCACCGCGAGGCGGAGGTGCTGCCCACGGCCGAGGTC
ATCTCCGCCTTCCCCGCCGCGAAGCGCCGGGTGGTCAACCGGCCACACCA
GTCCGTCCTCGCCCTGATCGCGGCCGAGCGATCTGCTTATTCCGGCGACG
TCACTGCTGCAGCACCGCTGCCGGTGCTAGAGAACATCTCGCACGGGCAG
CTGCAGGTGCTCTCTGGGGTGCTTCCGGACCACCCATCCCTCACCACAGA
CCCCGACAGGTCGTCCTTGTATGTGTGCACCCCGCCACCCCTAATGGAGG
GGCGTGGCGTGCCCAAACAGTTCCATGGTCGTCTCCATGTCGTGCCAAAG
CACTCAGATTGGTTCTCCCCCGGGACTGTGCATAGGTTGGAAAGGCAGGT
GGTTCCACACTTCTTTACAGGGAAGTCTCCAGGGCATACGCCGGAGAAGT
ACGCCATGTTAAGGAATAAAGTTATCGCTAAGTACTTGGAGAACCCAGGC
AAGAGGCTTGCTTTTGCCGAGTGCCAGGGGCTTGTTGGCAGCACAGGCGA
ACTGTATGATCTGAGTAGGATCGTTAGGTTCTTGGACACTTGGGGAATCA
TTAATTACCTTGCGGCTGGGTCAGTGCACCGTGGCCTGAGGATGGCAACA
TCACTTCTAAGAGAGGAACCGTCAGGGGAATTGCAATTGCTTACAGCACC
ATTGAAATCAATCGATGGCCTGGTTTTGTTCGACCGGCCGAAATGTAGCC
TGCAAGTGGAGGACATTTCTTCGATGGCATCATCTTCATCAAATTCAGAG
GTGGTGGATTTTGATGCTGCATTTGCAGACTTGGATGGGAAGATTAGGGA
CCGTTTGTCTGAAAGCTCTTGCAGTTATTGCTTACAGCCTTTTCCAAGTG
TGCATTACCGATCGCAAAAGGAGCAGGCAGATATTGCGCTGTGCTCTGAT
TGCTTCCATGACTCGAGATATATTACTGGGCATTCTAGCTTAGATTTCCA
GAGAGTGGATGGGGTTAATGATGGATTGGAAAATGATAGTGATAAATGGA
CTGATGAAGAAACATTGTTGCTGTTGGAGGGCATTGAGAAATACAATGAC
AATTGGGATGACATTGCAGGGCATGTTGCAACAAAATCAAAGGCACAATG
TATTTACCATTTTATTCGGCTTCCAGTAGAAGATGGTTTGCTAGAGAATG
TTGAGGTACCGAATGGATCGGTGCCATTTAGAGCACAAAGCAATGGTTAT
CCACATTTGGATTCCAATGGTAGCACTTCAGGGATACCACTTCAAAATTT
TCAACATGGAAATGAGCTTCCATTCATTAATTCTTCTAATCCTGTCATGT
CGTTGGTTGCATTTTTGGCCTCTGCGATAGGACCAAGAGTTGCAGCATCA
TGTGCACATGCGGCACTATCTTTTTTAACAAGAGATGATGATCCCAGGCA
CGGTTCAGAAGGCATGCATGCTGATGGCAGGGGCAATGGTGCAAATCCTA
ATTTTCACAACCATAATGGTGCTTCACCAGCCATTTCTCCAGAAAATGTG
AAACATGCTGCCATGTGTGGTCTGTCAGCAGCAGCAATGAAGTCGAAACT
CTTTGCAGACCAAGAGGAACGTGAAGTCCAAAGACTAGCTGCTACTGTAA
TAAATCATCAGTTAAAAAGGTTGGAGTTGAAATTGAAGCAGTTTGCGGAA
GTAGAGACTTTGCTCTTGAAAGAATGTGAGCAAGTGGAGAGGGTGAGACA
GCGGATTTCAGCTGACCGTGCCCGGATGAGGTCAGCCATGTTGGGTTCTA
CTGGAATGCCTGGAAGCAGTAGCACCATGCCATCCAATCCAGTAAGCATG
AGCCCCAGACCAGTTGGTGTGCCGGGCTCCATGCCTCAGGCCAGCATGCC
AACCGCATATGCCAATAACATTCAGGGACATGGTCATCCCCAAATGCCGC
AGATGCCATTCATGCATCAGCGGCCGCAGATGCTCTCTTTCGGTCCTCGC
CTTCCACTCTCGGCAATCCAGACTCAACCATCGCCCCAGGCATCAAACAT
CATGTTCAACTCTGGCATGCCCAGTTCGGTTACTCCTAACCACCATCAGT
TGCTGAGATCATCTTCCGGAAACAATTCTAGTGCAGGATAG
>Pgl_GLEAN_10033016 PgMYB124
ATGGGGAGGTCCCCGTGCTGCGAGCAGGCGCACACCAACAAGGGCGCCTG
GACAAAGGAGGAGGACCAGCGCCTCATCGCCTACATCAAGGCCCACGGCG
AGGGTTGCTGGAGGTCGCTCCCCAAGGCCGCAGGGCTGCTGCGGTGCGGG
AAGAGCTGCCGGCTGCGGTGGATCAACTACCTCCGCCCCGACCTCAAGCG
CGGCAACTTCACCGAGGAGGAGGACGAGCTCATCATCAAGTTCCACGAGC
TCTTCGGCAACAAGAATCATTTACCTATGGATGGTGCAGAATGCAGACTA
GCTCCTTTTCACTTCAAAAACAGCAACATTTTCTCTTTTTCTTTTAAAAA
AAGGGCATACAATGCAAGCATCCTCCCCCCTGGTGAGAGGGCAATGCAGA
ATGCCAGTATACCTTTCATTGTAAAGGGTTGA
>Pgl_GLEAN_10029589 PgMYB125
ATGACGGAGAGGAATGACCAAGGCGATGTGTTAGGCCTGGGTGGTTACAT
GGAGAAGAAAAGGTTGCTTTCAAAGACACTTTTGGCAGATGCTGAGGGAG
AGGTTAAGGTCACTAAGAAGAAGACTCGTCTTGGCTGGGGACAGGGGCTG
GCGAAGTATGAGAAGCAGCTGAAGCAACAAGATGGAGAGAAACTTGTAGC
TGACGGGGACAATGAAACTGCGAACGAAGCTGTAGTTTACACAGCTACTC
CAACACCAGTTGTAGGAGGCAAAAGTGATCATTGTAACAGGATCTCAAGC
ATGAGTGAAACCGTGGTATCTGAGGTTGCCTCCTCTCACATATGTGATCT
GCCAGAAGGAGCCAATGGTGTTCATGGCAATAGAAGCTTGATGAGCTTAT
TGGCAGAAGAAGTTGTTCAACCACCAGATGTGCCGCCGCCCTCTCCTAAA
TGTAGTACACCACCAGCTGGAGGAGACAATGGTGCTCTTGGCAATAGTAG
CGCAAGCTTGACTGCTGTGACTGTGGTCAATGCAGATACTCTGCTTGCTT
CTTCTGATGGTTTTAATCTATCACCAGATGGCAGCAATGCTAGATCGATA
AAGGTTCAAGATATTCCACACGAATTGATTTCGCAACCGATAAACAAGAT
TCAAAATAGTGCTAGAATGCCACCAATAATTATTAGAAAGTTGCAGAAGC
CTAGGGAGTTTCTAAATAAAAATATTGTGTTTAAGGAGCCAGGAACTAAT
GAACTTCAGGGCTCAGGATTCAAGACATGGTCACAGGAAGAAAAGGATGT
CTTTGCAGAGAAAATTAAAGCAATTGGTACAGATTTCGCAAAGATCTCAT
CTTTTCTTTCCCACAAATCAACGACAGATTGCATCAAGTACTTTTCGAAG
CATTATAAATCAGAGTGCTCAAATACACCAAACAAATGTCTGCCAGCTAC
AAAGCAATTGCAAGAGAAGTGCAAGGATGTGAACGATGCTGCACCTTATA
TGTCTGGTATAGCAACAGTTACAGCTACTAAAAGTTATAAAATGATGAAA
ACAGTGGAAGATGATTTGAAGAAACCAGCAAAACAAATATGCCATGAATT
GATGACTCGTTTGCAATCTCATAGTCACCCAGAAGACGGTCAACATGTTG
AATCATCTATAGAAGAATATGAACATGTAACTGGGAAAGTATTAGTAGGT
GAAATGGATGTTACATCCCTACAAGGAATGAACTCTCCGATCACTAAGTC
TAGTGAAGCTGCCTGTTTGACCATTCCCAAAACTGAGGTGGCAGAGTTGA
AAATTTTGAGTGAGGACAGTTGTTCCAATGAGGAGACTAGAAAAGGAGAA
CAAGAAATATGGACTAAGAAGGAAATATGCCATCTTATTGAAGCTATAGA
AATGCATGGTATGGACTTCTCACGTATCTCAGTCTATGTTGGTACGAAGT
CAATTCAAGAATGCAAAAATTTCCTCTGCAAAAATGACCTTATTCTTGGC
AAGAAGCATGTGAACAGCAATAGGAACAGCAACATTACAGTTGGTACTAA
TGTTGGTTCTGCAACAAGCATCATTCCGTCTTACTCGAAGGTAAAGGAAA
ATGTACCACAACCCCTAGCATGTGCATATCATAGCGATGGAGAAAATTAT
CAGGCTGGTGGGTCAAGTGGACAAGGTAGTTCTGAAATAATAATAAAGTC
TTTATCTGAGAGTTGTCAGAAATTATCAAATGTTACTACTGAAGTTTGTC
AGATCATCAGTGGTGAGGAAAATCCTGAGGTCAGTGCTATATCGAAGGAA
TGTAATATTGATGCTGAGCATTCATGGAATGAGGAGACAGAGACTAACTC
AATTACTAATGTTGATAATAACGCCCCATCTGATATGGAAAATCCCAGAA
GTGACGACAACCCCTACATTGCTACTAATGGTGCTGAATTAGTTGGTCAT
CATGAACTTGTGAAGCCATTGGAGGATTCAGAGAGACTCAAGATTCGCTC
AAAAGAAAATAATGATAAGGCCATAAGAGATGACAAAATGCCAGAGCACA
GCATTGCTTCAGGAGAAGGTAGTGGTATTCATTTGGGTTGCAGTGTGATT
TCTCAAAGGGACAAAGAAGTTGTTGATATTATCTCAAGTCCAGAAAGAAG
ACATCTCAGTGTACCTCCTATACCGGCCTCAGATGGATCATCAAAAATTT
CCAATTTGTCATGTACTTCAAGTTCTGTTGCTTTGCAGATAATTTATGCA
GAAACTTCTCACAGTGAAGTGGATATGGATCTGAATATACCTCATGATGT
GGCTGCACCAGATCTGGCTTCAGTAGCTTTCGATAATAATTGTCCTGAAG
CTTCCATGGATCTTCATGAACCCCTCGAGACCACAGATATTGCTGAAATA
ATAAAGCAGGAATCAAGCATCAGAGCAAGGGCAACCAATAATATGGGTGG
TGATCGTGAAGGTGCATATGATGTAACCAATGTTCAGGATACACATCAGT
CACAGACTATCGTAGCTGAATCCGGCCACCACCCTGCATATCAACCTGGT
TGTATTAGGCTTTTTGGTCAAGTCATCTATCAAGCTCCATTGTCCTCTGG
GACAAACCTTGATTCTAGTCAGGGAAACCAGTTTGTTTCCCACTCAGCAG
ACATGCCGTCTGCTACAGATGTTCCTGTTAGAGAAGGAGGTGGCCAACTT
TTTCCTCCAGGGCCTAGCATTTGGAGAAGTTCCCCCGTCAACCTCAGTCA
GCAAGTAGTTTTGTCAAATAATACGATGAACTTGGGCCAGCAAACAGTTT
TCTCAAATAATACGATGAACCTAGACCAGCAAGCAGTTTTGTCAAGTAAT
ACAATGAACCTGGGGCAGGAAGAAGTTTCGCCGGATACTACAATGCCTTG
CAGCTCAACTAGTGGTGCTGCAGCTTGGCGACCACTCCAGTTTGGAAGCA
GCGCGCTTGTAAACATGAGCCAACAGAGACAGTATATGCACATGATGATG
CGATATAGCATGATGAGACGTGGTGTACCCTATCACCTGAGGCAAGGAAG
CAGCAACGGCCTCACCAACTTTAATAACTTCAACCCGGGCCAACAGCAGT
GGCCAAACGATATTCTGGACACAAGCAGAGTGGTGATGGGTTACCCTTGC
TTGCCCGGCCCCACTCAAAACCAAGCTCGTACAACTATTATGCCATCTAT
AATAAATATAGAAGGCGTGTCAAGAAGCAGTACTGGGTAA
>Pgl_GLEAN_10009748 PgMYB126
ATGCCAGTGAAGGTGGAGCAGGACCTCGCGCTGGAGTTGCCGCCCAACGC
TGAGGCCGTGGCCGGGGCCGGGGCCGAGGCGGAGGAGTTCTCGCCGCCGC
TGTCGTCTGGCGAGGAGGAGGAGGAGGCGGACGATGACGACGACGATGAG
GAGGACGAGACAGACAGCGAGGGGTACGACGGAGCGGGGAACGGCGGCGG
CGCGCCCCAGCTGAAGAAGGGGCCCTGGACGCCCGAGGAGGACAAGCGCC
TCAAGGACTACGTTGAGGCGCACGGCGAGGGGAACTGGAACAAGGTGCAG
CGGAACGCGGGGCTCAACCGCTGCGGCAAGAGCTGCCGCCTCCGCTGGGC
CAACCACCTCAGGCCTGACCTCAAGAAGGGGCCCTTCGACGAGGAGGAGG
TTGATAAGGTCATCAAGTTCCACATGATGTGGGGGAACAAGTGGGCTAAG
ATGGCGTCCCATTTGCCTGGACGCACCGATAACGAAATTAAAAACTTCTG
GAATACAAGATTGAAGAGGCATCAGAGAGCTAATTTGCCTCTCTATCCAG
AACATTTGCGTTCTCAGGTTCTGGATCAAGACATGAGCTGTCACATTCCT
GATGAGTCACGTGGCAGGAAACGATCAAACGAGTTAACGCTGGAAAAAGT
TGTTGGTATGGATGATCTTGTAGGTGATCTAATGGTATTTCAGCACCTTG
ACTATGGTAAGGATCCAGTGATTCCAACAAACCCTTTGAAGCGCCATGCG
TCTACTAGTGATCTGTCATATGTGCAATCTCTTGACGAGGTGGAGAACTT
TTACTCCGATGATTTGAACTATGTATTGACAAAGAGTCAGTCGGTGCCTC
TTGGTAGTGCCATTGCCAATGGCTATCCAATATTTGATGGCAATCCCTCT
ACTTCAGGGACCATATACAGATCTGTGAAGACAGAGCTCCCTTCAGTCCA
ATATCGCAGCTATGACATCGGTGATAGCTGGTTGCTTCAATGCCCTACGG
CTTCTCCTATTGAGCAACAGATTGACACCTGTATTCAGTCTCCAGAGTCC
TTTTCTTCACAAAACACTGGTCTGCTGGGTGAAATTGCTAACAAGGGTGA
TGCAGTAGATGACTGTACAAAGCCTGAAAGATTTTTTGAAACAGTGTTTC
CTCCTCTTGGGTACAATATAATTTCACAATCAAATGCTTACCCTATGAGG
CATCCTTCCTCTTTAGTCATTAGTGACTGTGAACTTCAGGGCAATTTTTT
CGATGAAATTCAAGCTTCAAACTCACCTCCAAGCGGTAAGTGTGCTTAA
>Pgl_GLEAN_10011359 PgMYB127
ATGGCTCATGTCTCAACACAACTCCAGGAGGAGGAGAAGGAGGAGTCGCC
GGTGCCGCCCCCTCCCCCGCCGCCGCGGCCGTCGCTGGAGCAGGAGTTCG
AGGCCGTCATTTCCCGCGGCGCCGGCGTCCACGTTGTCCCCACCTTCGCC
GGATGGTTTTCATGGAAGGCAATTCACCCAATTGAGAAGCAAATGTTGGC
TACATTTTTTGATGGGAAATCAGAGATGAGGACACCCGAGTTATACTTGG
GAATTAGAAATTTAATCATGAGCAAGTTTCACTTAAACCCTGAAGTACAT
TTGGAGGCCAAAGATTTGTCTGAGTTGTCAGTTGGGAAGATGGATGATCG
TCTTGAAATTTTGGAGTTCTTGGCTCACTGGGGCTTGGTTAATTTCCACC
CTTTTCCACCAGTTATGCAGAAATGCGAGCTAGTTGAGAGCAAAACTGGT
GCTGATACAGCAGAGCAAATTTCTCTGGTTGAGAAGCTATTTCACTTTGA
AACAGTTGATTCGTATCTGGTACCTGTCCCGAAGAAAGCTGATGTCATAT
CTCCAGTTCAGTTCACTAGCTGGCTTGCTGAGCCTACTCTAGTTGAAGGT
GCGATAACTACAGCTGAGTCTTCTGTTGAGTATCATTGTAACTCCTGCTC
AGTTGATTGTTCCAGAAAGCGCTATCATTGTAGGACTCAGGTAGACTTTG
ATTTGTGTTCAGATTGCTACAATGCGGGAAAGTTTGATGAAGGCATGTCA
AAAGCTGATTTCATCCTTATGGAGTATGCAGATGTTCCAGGCTCAGGTGG
TTCTAACTGGACTGATCAGGAGACACTGCTTCTTTTGGAAGCATTAGAAA
TTTTTAAAGGAAAGGAATGGGATGAGATTGCTGAGCATGTTGCTACGAAA
ACAAAAGAACAGTGCATGCTATACTTTCTCCAAATGCCAATTTTCGATTC
CTTTCTAGATGGTAAAGAATTCAGTGAAACACCTCAGAAGATCACACAAC
AGGATTCAGCAGAAACTGGCACTTTTGCTGTACCTGAGGAAATGGATGTG
GATGACAATGCAGAAGGAAAAGAGAGCACTGATGAAAAAACTTTGAAGAA
AGCAAATGTTAATTCTTCAGAAACAGGAACAGAATTAGCTAACCAAAGCG
TTTCTGCTAAAGAGGATACTATGAATCAAGGTGATCATGTTCTAGTTGCG
TCTCCCGCTGCTGATGAATCAAACAAATCTTCATTGGTGGATCCTGCAAA
TAAGAAAAATTCAGCTGATGTTGATGTTTCTGGGGAACATGCATCCAACT
TTGTTATTGATGTCCTGAGATCTACTTTTGAAGCAATTGGTCACTTTCTG
GATAAAGAAGACTCGGGTTCATTTGCTGAAGCAGGAAATCCTGTGATGGC
ACTAGCTGCATTTTTTGCTTCTGTTGTGGAGCATGAGGATGCTGTTACTT
CATGTTGTAAATCACTGAGAGCTATATCAGAAATATCTCCTGCTCTACAA
CTGGCAACTGGGCACTGCTTTATACTTCCGGATCCACCGAGTAACCTCGA
AGATCCCACTCCCGAATTCAGCCCTTGCACAGGTGATGAGTGCCTAGGAG
CCGCTGGCGGTACTCAAAATGTGAATGCTACTGATAAAGATAGCAATAAA
ATGGAAGAAAGTGCTTTAGATCTGGAAAAGGAGAAAGCTACAATCACCTC
ACAGAAAGAGCACGTGGAATTATCTAACACAAAGGAATCATTTGTTAAAG
GTCCCCAAGCGGAAGTCATATCCAACGCCACAAAGGATTCTGATAATCGA
ACTGCTATAATGGAGAGTGGTGTTGCATCTGATAAGATGAGAGATGGTTG
TAATACTATTCTGTGTTCTGCTACTTCAACTAATACAAATGAACCAAGTT
CCATAGCTTCCCAGGAAGCCAGTGCTGAAAGGACAAAGGACACAACGAAC
CCTGAAGGAGTAGAAGGGGACAAACCAAGTTCTATGGAATTACCAGATGA
TGGCTCACATTTACATGGAAAAGTGGGCCCATCTAGCATGCAACAACACG
AGTCCAACCTAACTCGAAATAGCAACACAAAAGAACCTAAAAGCAATGAA
AACACCATTGCTGCTGCTGCTGCTGCTGATCCCGTAATAAGGCTACAGAG
AGCGGCAGGTACTGCCATTGCAGCAGGTGCAGTGAAGGCTAAGTTTCTTG
CGAAGCAAGAGGAATATCATATTTGGCAACTAGCTGCACTTGTGATCGAA
AAACAGTTTCAGAAGATGCAGGTTAAGATGTCATTTCTCTCCGAAGTTGA
AAATCTGGTCTTACCGTTGAGAGAATTGATACAGAGAACACGGAAGAAGC
TTACGCTGGAGCGGCGGGAGATCGCCTCTGCTATAGCTGCCACGGTGTCC
AGAACAAACCAGCATGGGGCTCCTGGGACTGCTAGGCTGCCACTGCCGGT
AGCCCTGGTTCAGCAGCTGAGGCGCCCTTGA
>Pgl_GLEAN_10021337 PgMYB128
ATGGATCCTACCAAGACCAACACAGAGTGGAGTGCCTTTGAGATCAAGAT
GGTCAAATCACTCATCGCAAGGTACAAAGCCAACAAAAGTCATACGGATG
ACATGAACAAGAAGCATAGTGACATTATCAGTGAAGTCCATGCAATGTTC
CCCTTGAAGGAGAGGCTTCAAGTAATCAACTTGTATGCTAATCTCATAGT
GGAGATGATGGAAAGCACCGTTGATAACGGATCCTATTACTTTGTTGGGG
CAAGCAGGGGCCTTGTGAACAACAACTTTGAAATTTCAGTGAAGGATCAA
GCCATAGACAACACGAGGGTGTCACAGGAGGTGCCATTAAGGCGTTTCGC
TCCTCGTGTGCAGAGGTCACGCACTGGATTTTGGACCATTTCAGAGCACA
GGTTATTCCTTTGTGGTTTGCAAGTTTATGGCCGTGGCAACTGGAAGAAC
ATCTCTAAGTATTTTGTAACCACCCGGACACCAATTCAAGTCTCAAGCCA
TGCCCAAAAGTACTTTCGGAGGATAGAGAATACTACTCGCAAGCAACGCT
ATAGCATCAATGATGTTGGCTTTTATGATGTCAAGCCCTGGGTACAAAAC
AATAACTATGACTGGGAGGGGTTCGGCTTCGGTGGCGGTGCCTACAACTT
AGACCATAATGGTGCTAATGGCCAGCATGCCACTGTGAACAACCTAGCAC
AAGTCCAGCCGTCTATGCTTTACCATGCCAGCCAGGCCAGTAGCAGTAAC
CAAGCAGTCACCTTGACTTGTGACAAGAAGATTGGGGTTACCAGTTCGTC
TGTGGCTCTAGTGATGGAGGGAGCTGGGTCCTCCCAAGTGCCTTGTGTCG
GTGATCAGCTGGGAGATTTCTTTTCCAACTGA
>Pgl_GLEAN_10007629 PgMYB129
ATGTTCCCCTCCTCCAAGAAGCAGCCGAGCACTGGCGCGGGGAGCTCGAA
TGATCGGTCCATGTGCGTGCAAGGCGGCGACTCCGGCGGCCTCGTCCTCA
CCACCGACCCCAAGCCCCGCCTCCGGTGGACCGCCGAGCTCCATGACCGC
TTCGTCGACGCCGTCGCCCAGCTCGGAGGCCCGGACAAGGCAACTCCAAA
GACTATCATGAGGGTTATGGGAGTCAAGGGTCTCACCCTCTACCATCTCA
AGAGTCACCTGCAAAAATTCAGGCTAGGGAAGCAGCACAAGGAGTTTGGG
GATCATACAGCAATGGAGATGCAACGTAATGTGGCCTCTTCTTCAGGCGT
GATTGGAAGAACCATGAACGACCGAAGCGTGACCGTGAACGAGGCGCTAA
GGATCCAGATGGAAGTCCAGAGAAGGCTCCATGGCGAACTAGAGGTGCAG
AAGCACCTCCAGATGAGGGTTGAAGCCCAGGGGAAGTACATGCAGTCCAT
CCTGGAGAAAGCGCACCAAGCCCTAGGGACCAGCGAATTCGCCACGTGGC
CTGCAGGGTACAGATCTCTAGCAGGCAACCAGGCCGTCCTTGACATTGGC
AGCTCCACGGGCTTCTCTTCCCTCCAGGACCTGCACTTCTATGGGGGAAG
CAGCAGCCACATGGATCAGCTTCTGCATCAGATGGAGAGGCCAATGGATA
GCTTCTTGACGCTGGGTGAGAGCTTCATTGGGTCGTCAGCAGACAAGAAG
GGCCCTAACCATTGCAGCTCCAGCGGCAAGGGCTCCATGATCTGGGCCGG
CGAGGAGGACCAGCAGCAGCAGGTTAAGAGCGGCACCGACCTGCTCCAGA
TGGGTCCATCGACAACGCTGGAGGGTGGCATTAGTGTCATGGACCCGATC
GCCGGCCTTTACGAGGGTGCCATGTCAGGCGACTCCATGGGCAGCAAGGG
TTTCGAGGGTTCAAGCTCCAAGCTCGAGATGAAGTCGCCTCCACACAACA
AGCACCTGTAG
>Pgl_GLEAN_10018726 PgMYB130
ATGGCGGTGCCGGCCCCTGCCCCGGCGCCCGCGGCGGGGGAGGAGGTGCG
CAAGGTCAGGAAGCCCTACACCATCACCAAGTCGCGGGAGAGCTGGACGG
AGCCGGAGCACGACAAGTTCCTCGAGGCGCTGCAGCTTTTTGACCGTGAT
TGGAAAAAGATTGAAGCATATGTTGGCTCAAAGACTGTTATACAGATAAG
GAGTCACGCACAGAAGTACTTCTTGAAGGTTCAGAAGAATGGTACAGGCG
AGCATCTTCCTCCACCCCGGCCAAAACGAAAGGCAGCTCATCCGTATCCA
CAGAAGGCCTCAAAAAATGCGACTCAAGCTGTTCTGTCACAACAACTTCC
TCCTCAGAGGGAGCAAGGCTCTGTCATGTCTATGGATACATCTACTGCTG
TTAGAAATGCAAATGCAAATGCAAGTGCAAGTGCAACAGTGCCTTCCTGG
GACAATACTTATGTGCAAGGTGCTGTTGCAACAAATAATTGCTCTAGTAG
CATAGAGAGCCCATCCGGAACGTGGCCATCTTCTGAAGCAGTTGAGCAAG
AAAATGTGGTTCCACCACTCCGTGCCATGCCCGATTTTGCCCGGGTATAC
AGCTTCCTGGGAAGCATATTTGATCCTGAAACCAGTGGGCATTTGCAGAG
GTTAAAAGCGATGGATCCAATTGACGTTGAAACGGTACTACTGCTTATGA
GAAATCTATCAACAAACCTTACCAGTCCTGCCTTTGAAGAACATCGGAAG
TTGCTATCATCATATGGTTATGACAGTGACGACAACATTAAATCAGAAGG
CATGGACAATCTTGGATCTCCTCAAAGTTGCCATCTCCCATTCATGTAA
>Pgl_GLEAN_10018730 PgMYB131
ATGAGAGGATTCGAGAGGAAAGGAGTCCGGCAGTACAACCGGTCGGAGGT
GCCGCGGATGCGGTGGACGGAGGAGCTTCACCGGCAGTTCGTCGAGGCCG
TCGAGTGCCTCGGTGGCCAGGATGAAGCAACTCCGAAGCGAATTCTTCAG
TTGATGGGCGTGAAAGGAGTCAGCATATCTCATATCAAGAGCCATCTTCA
GATGTACAGAAGCTCTAGCAACAGCAGTACCCATCAGTCCAGCCTCCAGA
AATCGACATCAACCAGTGATAGCAAGCGTGTCCTGAACCGTGAAGATCAC
TGCGTCTACGCATCACCGGATGGAAACACCCCAGCTTCTGAAAAGAACAT
TTACGCCATGTTCCGTGGTTGCAGTCATTCATCACCGTATCAAATACCGT
CTCTACAAGAAGTATTCAGAAGCTGGGAAAGTAGAGGACGTGTTCCTTGG
GACTCCAGTGTGCTGACAATGGAGAAGGCGGTTAGGCCAAGAAGTCATCA
CACTATTACTTGCAACAAGCAGAAGCCTGAGGGCTGCGACCTCACGCTGT
CGATCGGCCTGTGGGAGGACGCGATCAGCAGCGACGCCGACGGATCGAGC
ACGATCAGCGAGGAGCTCTTCCCGGCTCCAGCAGCCGGCGCCACCGTGAA
GGAGGAGGAGAGCAAGCCGGCTCTGAACCTGGACCTGACCATCTCGTCGT
CGTGGCTGGCCTGA
>Pgl_GLEAN_10026117 PgMYB132
ATGGCGAGGAGCGGCGGCGGCGGCGGCGGGATGGAAGGATGCGGCGGTGG
CGGGCTGAAGAAGGGCCCCTGGACGCAGGCGGAGGACAAGCTGCTGATCG
ACCACGTGCGACGGCACGGGGAGGGCAACTGGAACGCCGTGCGCCGGGAG
ACCGGGCTGCAGCGATGCGGTAAGAGCTGCCGGCTCCGGTGGGCCAACCA
CCTCCGCCCAAACCTCCGCAAGGGACCCTTCTCCCCTGAGGAGGAGCGCC
AGATCCTCCGCCTCCACGGCCTCATCGGCAACAAGTGGGCCCGCATCTCG
TCGCACCTGCCCGGGAGGACGGACAACGAGATCAAGAACTACTGGAACAC
GCGCCTCAAGCGCCGGCAGCGCGCGGGGCTCCCGCTGTACCCTCCGGACG
TCGAGCGGGAGATCGCGTCGCTGCGGGCGCAGAACATCAACCCGTTCGCC
GACGCCGACGGTAACGCGAGCTCCGGCCTCCCGCCGTCGCTCATCTACGA
CGCCAGCAACCCGTTCGCGCTGCCGCCCGCCGTGCTGTCGCCCTCGGGCT
CCGCCACGACGGCGTCCCACTCGCCGCTAATCAACCAGAGCTACCCCCTC
CTGAACCAGATGCAGGGGATGCCGGTGTTCCACCTCGCCAGCAGCCTGCA
GTCGCCGCAGCCGGTGTTCCACCACCACCACCAGGACAGCGGCGCGGCGC
TCGGCCACGGCCACGGCGGCGGATTCGTCTCCTCGGGCCTGCCGCCGTTG
CCTACTAGAGCGCACGAGCTCCCTTCGAACCAATTCGACACCTCGAGCAG
CGGCAGCGGCGGCGACGGTGCCGGGCTGCTGGAGTCCCTGCTGCTCGGCG
GCGACGAACACCTGCCGCGGCACACCCCTACCATGGTTAAGGTCAACTCC
ATGCCCGCGCTCACGTATCGCGAACCCGGCTCCGGGCTGCCCGTCCACGG
TGCCGGCGCCGGGAGCGACAGCGACGATGCCTCGCACTGCTTGCCCGGAG
AGGACATGCACCATGGCGCGAAATGGAACTTCACCTACGAGGACTTCAAG
CCGGCGAAGAGGAGGACGCCGAGCGAGGCGGGGATCTCCGACATGTGCGG
CGTCGCCCCGAGCTCCACCCCGGGGGAGTGGTTCCGCGCCTGCGGCGGCT
CGACGGCACCATCGCCGGGACCGTCGTCGGCCGTCACCGACGACGAGTTC
GGCCTGGAGATGCAGCAGTTCATGTCATTGCTACCACTGTCCATTGACGA
GCACAGCTGGAATGCATAA
>Pgl_GLEAN_10038507 PgMYB133
ATGAGCACCCAGAGTGTTGCAACTGGGGAGCAATTTATTGCTACTGACCA
AACAGTACATGCCTGCACACCCACACAAACTTCAGTCCATAAGCTGTTTG
ATTCTAAATCAGACCACCGGCTCTTGATAGATGACACTTTGTCATCCACG
AGCCAATCATCAAACATCAAGACTGAGTTGATACGGTCGTCGAGCTTGTC
AAGGAGCCTATCAGTTAACCTTCAGAAAAGAAGCCCTGAAACTGATCCAG
AAAGCCCTCTGTCTCACATCTCACATCCAAAATTTTCTGACCCCATATTA
TCAAATTCGTCGACCTTCTGCACAAGCTTGTTTTCGTCGTCTTCAAAGAA
CACAGATCCATGCCGGCAAATGGGCACTTTACCTTTCTTGCCTCACCCTC
CTAAGTGTGAGCAGCAGGTTTCAGCCGGACAGTCATCGAGCTCCTCTCTT
CTCTTTATCGGTGACACTGGCAATGCTTTAGATGAAGCTGAACAGTCAGA
TGATCTAAAAGATTTCCTCAATCTTTCTGGAGATGCTTCAGATGGCAGCT
TCCATGGAGAAAACAATGCCATGGCTTTTGATGAACAGATGGAATTTCAG
TTCCTGTCTGAGCAGCTAGGAATTGCCATCACTGACAACGAGGAGAGTCC
TCATTTAGATGACATATACGGCACACCACCACAACTGTCATCACTTCCAG
TATCATCTTGCCCCAACCAGAGTGTACAGAACCTAGGATCACCAGTTAAA
GTCCAGCTTAACTCATCTCGGTCATCTTCTGGCTCTGCAACAACTAACAA
GTCAAGATTGAGGTGGACACTAGAGCTTCATGAGCGTTTTCTGGAGGCTG
TGAACAAGCTCGAAGGACCTGAAAAAGCAACTCCTAAGGGTGTGCTGAAA
CTAATGAAGGTAGAAGGCCTAACCATTTATCATGTGAAGAGTCATCTGCA
GAAGTATCGGCTTGCGAAATATCTTCCTGAGTCTAAAGAAGATAAGAAGG
CTTCCTCGGAGGATAAGAAAGCACAATCGTGTAGCAGCAGCAGTGATTCA
AGCAAAACAAAGAATTTACAAGTGGCAGAAGCTCTAAGGATGCAAATGGA
GGTTCAGAAACAGCTTCATGAGCAGTTAGAGGTGCAAAGGCAGTTGCAGC
TCCGGATAGAGGAACACGCAAGATACTTGCAGAAAATACTGGAAGAGCAA
CAGAAGGCTGGCAACTTGTCGCTAAAAGCACCAACCAAAGCACAAGCAGA
GTCACCTGAATCGACAGTGTCAAAGGAGAGAAGTGAATCCGAGGCAGGCA
CCACTTCGCCGTGTCCATCCAAGAACAGAAATCCGGATGTTGACTCAGAA
TGCAAGTCAGCTGCTGTTAGCAAGAGAGCAGAGTTTCAGGTGGATCCTGA
GAGTGAGGTCCCCTGTTCATGA
>Pgl_GLEAN_10021771 PgMYB134
ATGAACTGCCCGGAGGAGGAGAGCGGGAGGAAGGCGGCGCCGGTGGTCCT
CAGGCTGTTCGGCGTGGACGTCCGCCGCGTCGGCGATGAGGAGCTCGGCG
GGTTCGAGCTCAGAAAGTGCTCAAGCATGCCCGACCTCACCGTCAACTCC
ACCGACCCGGTGATGCCGCCCGCCGACGGCAAGGGGTACGCCGCCGACGA
TCTGGAGATGTCGTCAAGGCAGCAGAAGCGCCGCCGCCGCAAGGCCCAGG
AGAGGAAGAAAGGGATTCCATGGACCGAGGAGGAGCACAGGAAGTTCCTT
GACGGCCTCAGGCAGCTGGGCAAGGGGGACTGGAGGGGCATCTCCAAGGG
CTTCGTGACCACCAGGACGGCGACGCAGGTGGCCAGCCACGCCCAGAAGT
ACTTCCTCCGCCAGACCGACCCCGGCAAGAAGAAGCGCCGGGCCAGCCTC
TTCGACGTCGGCATCGCCGACTTCGGTGACGATCAGGTGCCAAGCCCTCC
AAATAGTGCCACTAAGCCTGCTCCCACTCAGGAGATAATTCACACCGACC
GCGGCGACGTCCCGATACCAAGCTATAGGGGCTTTGCAGCTATTTTAGGC
AATAACATTCAGGTTAGTGAACTGACTAATTATTTCGAGAGACCATTGCC
TCACGCGGAGACATCGTTCGCGTCCATGGCCTCCTCCGCCCTGGAAACAG
CTTCGTCCGTCAACAGCCTGGAGCTCAGCATCGCCGTCAACAATCTGGGG
CTCAGCATCGCGCCCCCTGCTCGCTACGGCCGCAGTAGTGGTGCTGCCGG
GGCAATCAAAGTGCTGTGA
>Pgl_GLEAN_10001215 PgMYB135
ATGACGCGGCGGTGCTCGCACTGCAGCCACAACGGGCACAACTCGCGGAC
GTGCCCCAACCGCGGGGTCAAGATCTTCGGGGTGCGCCTCACCGATGGCT
CGGCCATCCGCAAGAGCGCCAGCATGGGGAACCTCTCCCTCCTCTCCGCC
GGATCCACCAGCGGCGGCGCCTCCCCCGCCGACGGGCCCGACCTCGCCGA
CGGCGGCGGGGGTTACGCCTCCGATGACTTCGTCCAGGGCTCGTCATCCG
CCAGCCGCGAGCGAAAGAAGGGTGTTCCTTGGACTGAAGAAGAACACCGG
AGGTTTTTGCTGGGATTACAAAAGCTTGGGAAAGGTGATTGGCGAGGAAT
TTCTCGTAATTTCGTGGTGTCAAGGACACCCACTCAAGTAGCAAGTCATG
CTCAAAAATATTTTATACGTCAATCAAATATGAGCAGAAGGAAGAGAAGG
TCTAGCCTTTTTGACATGGTTCCTGATGAGTCAATGGACCTTCCACCCCT
TCCTGGGAGTCAAGAACCAGAGGCCTCGGTATTAAATCAACCACCACTCC
CGCCACCTGTGGAGGAGGAGGTAGAATCGATGGAGTCTGATACTTCCGCT
GTTGCAGAGAGTTCTGCAGCTTCTGCTGTCATGCCAGAGAATATGCATCC
AAGCTATCCGGTTATTCTTCCAGCTTATTTCTCACCGTTCTTGCAATTCT
CAGTTCCGTTCTGGCCGAATCAGAAAGACGGAGACGATCTGCCCCAAGAA
ACACATGAGATTGTCAAGCCTGTTGCAGTTCATTCGAAGAATCCAATTAA
TGTTGATGAACTTGTGGGCATGTCGAAGCTAAGCATAGGGGAGTCTGGTC
AGGAGACAGTATCAACATCGCTTTCGTTAAATCTGCTAGGAGGTCAAAAT
AGACAATCCGCTTTCCATGCAAATCCTCAAACAAGGGCTCAGGCCTGA
>Pgl_GLEAN_10003870 PgMYB136
ATGGCCGGGAGGGAGAGGGTTGATGGAGCGGTGAGGCAGTACAACCGATC
CAAGGTCCCTCGCCTGAGGTGGACGCCTGACCTCCACCGCCGCTTTGTCG
ACGCCATACACAGGCTTGGAGGCCAACACAAGGCTACACCCAAGCGAGTC
CTGCAGCTGATGGGCGTGGGAGGTCTCACCATATCCCATGTCAAGAGCCA
CCTACAGATGTACAGGAACATGAGAACTGATGATCTTGACATGAAAGAGA
TGCAGCAGGTAGTGGTGCATCCGACACAAATGTTTGCAGGAGGCGTCCAT
GTTTGGACAGATATGGAGCACGATCATCATGGCTACTGCTATTGCTGGTG
CTGCTATTCTCAAAAGGAAATACTGCTCCACGACCTGCAACTGAAAAGTG
TGAGACGAAGTTACCGAAATTTCGGTCACATAGAAGTTACAAGTACACTA
CGGGTCCAGCGGGAAGGAGGAGAGATCTGCGGCCACAATGCAACGGCGCC
AAACAACCGGTGGGCGACGGCCGTGAATGAACGTGGCGCCGAGGACAGGG
ACGAAACCTCGCCGTCGCTCTCCTTAACGCTGGACTCCGGGTGTTGCAGC
AGGACGAGCAACGGCAGCGGCCGACGCAACAGGCAGGGCAGCTTCGTTTC
CTCGCCGTCGACGGGTTATGGGCGCGGTTGCTCGGGACAGCACGGCGGAC
GAAGTAGGATCAGCTTGGACCTCTCACTGTCCATGCCCATGTACAACCAG
TAG
>Pgl_GLEAN_10034383 PgMYB137
ATGGGGAGGAAGCCGTGCTGCTCCAAGGATGGGCTCAACAGGGGAACTTG
GACAGCCATGGAGGACGACATCCTCTTCTCCTACGTCAAGAAGCATGGAG
AGGGCAAATGGGGAAGCCTCCCCAGAAGAGCTGGGCTGAAGCGGTGTGGG
AAGAGCTGCCGGCTGCGGTGGCTCAACTACCTGCGCCCGGGCATCAAGCG
AGGCAACATCTCCGAGGATGAGGAGGAGCTCATCATCAGGCTCCACAGGC
TCCTCGGCAACAGGTGGTCGCTGATCGCAGGGCGGCTGCCGGGGCGAACA
GACAATGAAATCAAGAACTACTGGAACACGACGCTCGGCAAGAAGGTGAT
GCTCAAGAACAGCGTCCGCTCCAAAGAAGGTAACGGAGCCGCACCGGAGC
CGGAGCCGGAGGCAAGCCCGGTGGTGGTCCGGAGCAAGGTGCTGCGGTGC
ACCGCCAGGCTGCTGCCGGTGGTGCCCGCGAGGACCGCGACCGGCGACAA
CGGCGTTCGCGCGGAGGAGGCCGCAGTCGAGGCGGCGCCGGAGCCGGTCG
TGGAGGTGCAGCAGGAGCAGCAGCTGGATTTTCTTCGGGAGGATGAGCTG
CCTGTCGACCTCGACTTCGACATGGGCGAGCTGGGTTTCCTGAGCCCGTG
GTGCGGTGAGGTCGGTGGCGGCGTGGGGCCGGGTGGCTGGTTTGGCGGCG
ACGAGGTCAGCGATCTGGAGACACTGCTGCTGGGGCCCGGAGGCGACGGC
GAGCTTCACAAGTTTGCATGGTTTTGA
>Pgl_GLEAN_10024859 PgMYB138
ATGGGGCGGCCGCCGTGCTGCGACAAGGAGGGGGTGAAGAAGGGCCCCTG
GACGCCCGAGGAGGACCTCGTCCTCGTCTCCTACGTCCAGGAGCACGGCC
CGGGCAACTGGCGCGCCGTCCCCGCCAGCACGGGGCTCATGCGCTGCAGC
AAGAGCTGCCGCCTCCGCTGGACCAACTACCTCCGCCCGGGCATCCGCCG
TGGCGGCTTCTCCGGCGACGAGGACCGCCTCATCGCCCACCTCCAGGCGC
TCCTCGGCAACCGCTGGGCCGCCATCGCATCCTACCTCCCCGACCGCACC
GACAACGACGTCAAGAACTACTGGAACACGCACCTCAGGAAGAAGCTGCT
CCTCCAGCAGCAGAAGATGCAGCTGCAGCAGCGGGCCTCCGCCGCCCTCT
CGCCGCCGCTGCCGCCACCGCCGCACAAGGGGCACGCGTCTGACAAACGC
ACCGGCGCCGCACCGGTGGCTGGACAGCCGTTCGCGCGCGGGGAGGAGGG
AAAGGCGACGGCGGCGGACGGGGAGGTGCCGCTTTCGGAGATCGAGTCGT
GGCTGCTGGAGCTGGAGGACGGCGGCGGCGAGCACAAGCCGGGGCTAGCG
GACGGCCTCCTGCTCGATGCGTCCCTGCGTAATTTCCGTTTCTAA
>Pgl_GLEAN_10024824 PgMYB139
ATGGCGAAGCAGTCGTCGTGCTGCCACAAGAAGAAGCTGAGGAGGGGGCT
GTGGTCGCCCGAGGAGGACGAGAAGCTCATGAACCACATTGCCAAGTATG
GCCACGGCTGCTGGAGCTCCGTCCCTAAGCTTGCAGGACTTGAGAGGTGT
GGCAAGAGCTGCCGGCTGAGGTGGATAAACTACCTGAGGCCAGACCTCAA
GAGGGGCACCTTCTCGCAGGAGGAGGAGGACCTCATCATACACCTCCATT
CCTTGCTGGGAAACAAGTGGTCTCAGATTGCGGCGCAGCTGCCCGGCCGG
ACGGACAACGAGCTCGGGCCGAACGCCGTGGCCGACGCCGGCCACGTCGA
CAGCTACGCCGGCGCGCTGGACGAGCTCAGGTGGTCGGAGTACTTCGACG
CCGCCTTCCAGGCCGCTGCGAGCCAGCAAGGCGCCCTGCAGGCCGGCGGG
CAGTGCGTGTACAGCGGCGGCAAGGACGACGACGTTGCGGTGCACTTCGA
CGTCCATGGCCTGGGCAACTGGTGCTAA
>Pgl_GLEAN_10015206 PgMYB140
ATGTATCATCATCAACAACAGCTCCAGAGTCACAACCATTTCCTGTCTCC
TAGGCAGACATTCCCTCCAGAAAGACATTTGCTTCTGCAAGGAGGGAGTG
TTCCAGCAGAGCCAGGGCTTGTGCTTTCGACTGATGCTAAGCCTAGGTTA
AAATGGACACCTGAGCTACATGAGCGCTTTGTGGATGCGGTGAATCAACT
TGGTGGACCTGACAAAGCTACACCAAAGACAATCATGAGACTCATGGGTG
TCCCTGGACTAACACTATATCACCTTAAGAGTCATCTTCAGAAATACAGG
CTAAGCAAAAATGTTCACACCCAAGCTAATGGTGGAAATGCAAAAAATAT
GGTTGGCTGCACCATGGCAATGGAGAAGCCACCTGAAGGAAATGGTTCAC
CAGCTAGCCACCTAAACCTCGAAACCCAGACAAACAAATCTGTGCCCATA
GGTGAAGCCCTTCAGATGCAAATAGAAGTACAGCGCCGACTACACGAGCA
ACTAGAGGTACAAAGGCATTTGCAACTCCGCATTGAAGCACAAGGGAAGT
ACCTACAATCTGTGCTAGAAAAGGCACAGGAAACACTTGCAAAGCAGAAT
GCAGGGTCAGTTGGCCTAGAAACTGCGAAGATGCAACTATCAGAATTAGT
CTCAAAGGTATCAACAGAATGCCTCCAACATGCATTTACAGGCTTCGAGG
AGATGGAAGGTTCACAGATGGCACAAGGGCACACCTTGCAACTTGGTGAT
GGATCAGTTGACAGCTGCTTAACTGCTTGTGATGGCTCACAAAAAGATCA
AGATATCTTATCAATCAGCCTTTCTGCTCACAGAGGAAAGGAGATAGCAG
GCATGTCATTTGATTTACAAGCAAAAGAAAGAGGAAGTGAGGATTTGTTT
CTCGACAAGCTAAGCAGGACACCTCCAAGCCACCAAGAGAGACGTGAGAG
AGACAGTTTTATTATGGCAGCAAAATTGGACCTGAATATCAATGACGCAA
ATGATGGACCTCAGAACTGCAAGAAATTTGACTTGAATGGGTTCAACTGG
ACCTAG
>Pgl_GLEAN_10026185 PgMYB141
ATGGCGCACGAGAGAGACGCGAGCAGCGAGGAGGAGGTGATGGCCGGCGA
GCTCCGCCGCGGGCCGTGGACGGTCGAGGAGGACCTCCTCCTGGTCAACT
ACGTCGCCTCGCACGGCGAGGGCCGCTGGAATTCGCTCGCCCGATCAGCA
GGGCTGAAGCGCACCGGCAAGAGCTGCCGCCTCCGGTGGCTCAACTACCT
CCGCCCGGACCTCCGGCGCGGCAACATCACGCCGCAGGAGCAGCTGCTCA
TCCTCGAGCTGCACTCGCGCTGGGGCAACCGCTGGTCCAAGATCGCGCAG
CACCTCCCCGGCCGCACCGACAACGAGATCAAGAACTACTGGCGCACGCG
CGTGCAGAAGCACGCCAAGCAGCTCAAGTGCGACGTCAATAGCCAGCAGT
TCAAGGACGTCATGCGCTACCTCTGGATGCCACGCCTCGTCGAGCGCATC
CAGGCCGCCGCCGCCGGGGCGCCGCAGCCGCAGCTCGGCGCCGACACGCC
CCTGTCGTCGTCGTGGCAGCACGGCGCCCAAGACGGAATCTACGCGTCGC
CTGATGAGCTGCCCGCCGACGCCTGCTGGCCAGCGGAGTACTACTCGGCC
GCCGGCGACCACCAGCTGCTGAACAACCCCCACGCCGTCCCGGAGCTGTC
GGGCACCACGGCCGGGTCGTCCTCTCCGTCCTCGGACTCCGGCGCGGGGG
CGCAGCCATGGCTCGCGCCCATGAGTGGAGCGGAGTGGTTCACCACCGCC
TGCGACGCCTCCAGCGCTGCCGCCGTGGCCATGCATCACGACACTGTCCT
GGCCGGTCACCAACAGCAAACGCAGCAGCAGCAGCCGTGCCTGGTCGGGG
AGACGTGGGCGTCGTCGGAGCTCCCGGAGCTCGGCGTCGCTGACTTCGAG
ATCGGCAGCTTCGACGTGGAGAGCATCTGGAGCATGGACGACAACTTGTG
GTACACGCAGGCGCAGGGCGTGTGA
>Pgl_GLEAN_10009674 PgMYB142
ATGTCATCCTCTTTACCTATTTTGCCAAATTCTTTGAAAGAGAGCTTCCC
AATGCCTCATAACCCCCAGCACATTCCAATGTCAAGGCAGCTGCCTGATG
ATTCTATGCCCTTGCATAATGGCACACCTCAATCTGATATTTTGCAGCCC
AGAACTGGTGTTATTGGAGCATCATATTCAGGCTACTCTGCTAATCCACT
TGATTCTGTTTCTAACCATGAGGCACAGTTTATGGTTTCTCCCTTTATTT
GTCAGCCATCCAATGTTGATGTTTTCCAGTCTCTATCTGATAATACCCCA
GGAGCCCATGCTGAAGCTACCTGGTTCCCATCTTCTATGGATGTTTTACC
AGTTTACACAGATAATATTGCTGCTTCTGATAATCAGATCCAGAGTGGCA
GTTCTGCTATGACATCTGATGAGGTTGCTAAACAAAACGATTGGTGGGCA
GAGATAATGAATGATGATTGGAAAGATATTTTAGATGCAACTGCTACTGA
TTCCCAGTCAAAGGCCATGATGCAACCTTCCAACTCAACTGCATCACTGC
TTGCAGTAAACCAGTCAGCTTCATCTTATAGTGGGGATGTTTGTCCTGTT
GCTAGTCCTCCCAATAGCTGTAATGCTTCTGCAGCTAAACAACGGATGAG
ATGGACCCCAGAACTTCATGAATGTTTTGTAGATGCTGTAAATCAGCTCG
GCGGTAGCGAAAAAGCTACTCCTAAGGGTGTGCTCAAGCTTATGAAAGTT
GATGGTTTGACAATATATCATGTCAAAAGTCATCTGCAGAAGTACCGCAC
AGCCCGCTATAAACCAGACCTGTCTGAAGGAACATCTGAAAAAAGGACCA
CCACTGAAGAGCTGTCCCTGGACCTGAAAACGAGCATGGATCTTACTGAA
GCGCTGCGCCTTCAGATGGAAGTACAGAAGCGTCTTCACGAACAGCTTGA
GATTCAGAGAAAATTGCAGTTGCGGATTGAAGAACAAGGAAAGTATTTGC
AGATGATGTTTGAAAAGCAGTGCAAATCCACCACAGAGGTGGTCCTGGAT
CCATCCTCAGGTGATACTTCAGCAAATCCATCATCTGATCGGAGCCACTC
TGCAAACAAGGATAGTAGTGCAGCCATGGACCGAAACAGAATAGGAGACA
GGCCTGGAACTGCCAAACTGGGAGAACGATCGACCCAATTAGGTGTCAAA
CAGAAAATTGCAGAAATCAACGCTGACACCGAAGCAGCTGCAGATGGTGC
ACCTAAGATATCCCAAGATAAGCGTCGCAAACTGCAAGATAGTTAA
>Pgl_GLEAN_10030123 PgMYB143
ATGGGGAGGGCGCCGTGCTGCGAGAAGGTGGGGCTGAAGCGGGGGAGGTG
GACGGCGGAGGAGGACGAGATACTCGCCAGCTACATTGCCAAGCACGGGG
AGGGGTCCTGGAGGTCGCTGCCCAAGAATGCAGGGCTGCTCCGCTGCGGC
AAGAGCTGCCGGCTGCGGTGGATCAACTATCTCCGGGGGGACGTGAAGAG
GGGGAACATCTCCAAGGAGGAAGAAGACGTCATCATCAAACTCCACGCCA
CCCTTGGGAACAGGTGGTCCCTGATCGCCAGCCATCTGCCCGGCCGAACA
GACAACGAGATCAAAAACTACTGGAACTCGCACCTCAGCCGGCAGATCCA
CACGTACCGCCGGACCTACACCGCCGCCCCGGACACCACCATCACCATCG
ACATCAGCAAGCTGCACAGCGCCAATAAGCGCCGCGGAGGCCGGAACCCA
GGCCGGTCGCCGAAGAGAGCCGCCGCCGCCGCCACCACCAGCGGCAGTAA
TAACATGGCCAAGACCAAGGATCTGCCGGACGACGACCCAGGTAGTAAGA
AGCCGGAGCCGGAGTCCGGCAACGCGACAGGCGCCTCGGCGGCGTCGAGC
CCGCCGCAGAGCNNNNNNNNNNNNNNNNNNNNNNNNNNNNNCAGCAGCAG
CGGCGCCGGCGCCACGCCGTGCAGCGAGGACACCACCGGGCCGCTGGCGG
CGCTGGACCCGATGCAGTTTGGGGGCCTTTGGGAGGCCGAGAGCGAGATG
GAGGCCCTTCTGCTGATGAGCGACGGCGGAAGTTTCGTGTGCGGGCCCGA
TCCGATTACGGGGTTTATGGACGCGGTTGGTGATGCGGCCCACCAGGTGG
ACGATCTCCTCGACATGGACTGGGACGGCTTCGCGGCCCATCTCTGGGGA
GATCACGCCGCCCCGGCCCAGCATCAGCAGCAGCTTCAGCAATGCGACGA
CGACCAGAGCACGCCGCCGCTGCTCCCGCCCGATGAGCCGCTGCCGCAGG
CCGCCGCCGCGAGCTGCAACAAGCACCAGGAGGACGAGCTGGAGTCGTTC
GCGACCTGGCTCCTGTCGGACTCGTTCTGA
>Pgl_GLEAN_10014494 PgMYB144
ATGGAGTGGAGCGACAGCGAGAACGAGAGGTTCGAGCGCGCGCTGGCCAC
CTACGGCATCAACGCGTGGGAGCGCGTGGCGGCGGCGGTGGGCGGCGGCA
GGACNTCGACTGTCTCCGGGAGGACGTCGGCGACATCGAGTCCCGCGGCC
GCGCCGCCGACGCCCGCGACGCCCGCAACGGCAACAGGAATAACAACAGT
GCATGTAAAGCTTGCCCCTTAA
>Pgl_GLEAN_10023408 PgMYB145
ATGGAGAAGGAGGTGCGTGAAGAGTTGAATCCACTACTTCAAATTATAGA
GTTCGCTCCTTCAACATCTGATCCAAATCAGAAGCTTGATTCGGCTCAGC
CTTCCGATCCCAATCTGAAACCTGCGAAAAAGCCGACTCGTCAATGGGCT
GCGTGGACACGCCAAGAGGAAGAGAATTTCTTCAATGCGCTGCGCCAAGT
TGGAAAAAACTTTGAGAAGATTACACATCGTGTCCAGAGTAAAAACAAGG
ATCAGGTCAGGCATTACTACTATCGTCTTGTTCGGCGCATGAAGAAACTA
TTGGGTCCTGGATTCTCACTTGATGCAAAAAACTCCAAGGATACCATTGC
TGCTATGCTTCGTTGGTGGTCTCTGCTCGAAAAATTTAGCTGCAGTGCAT
CAAAGCTGCATCTGAAGCCTCGGAGATTCAAAACATTTGTGGAAGCATTG
GGAAATCAATTGCTAAAGGACAGAAATAAATCCAGAAGAAAGTGCCCACG
AGTGGATATGTGTGTATCTTCTCCATCTCCAATTGTTGGCAAGGCTCCTG
GGAATGAGCCTTTCCCTCTAAAATTTTTGCCAGTTGATACTCAAAATGGT
AGCAGAGTTGCATCTCCTAAAGGGGCTTTTTTCAAGCGGGTGGCAGAAAC
AAATTCTAGCAAGTCAGGGGCAACTAAAGGAGATCTCTCCGCCACAAGAA
CTGTAAAACAAAAAAGGAGGGCAGGTGGTGTTGTTGCATCCGCTGCATAC
AAAAAATGGGAGAGAGCAGCCATGGCTGGTGTTTCATTAGTTGCTGATGC
AGCTGAGGAGCTTGAGCGCAACACTAGTAACTCTGGCATATTATGTAATG
TTGATGCAAGAACCCTGACTTCTTCATCAGACAAACTTTCTACTGTTGAT
GGCATCAGCACAAATCATATGAAGGAAGCAGACTCACAAGCACCTGCAAA
GCTGAAGCTGCAGTTATTTCCAATAAATGAAGCTACACGGAAGGCATTGG
AAAAGGACGAACACAATCCACATCTTGAGCTCACACTTAGCTCTAGGAAG
AAGATATCATCTGTGTTAGAACATCTGAATCGTAAATGGGGTAATTCAAA
CATTTCATCTGGAGAGCTTATTCTTTTTCCATATTGCGCTCACCAAGAGG
ATTTAGCTACATATCAGAGGTGGACAACAAGAGATACTGTTGCAGTAGCT
GACGTGTTTGTTTCTGTGAATAGCCCTTCTGTTTTCCGTTTAAGGTATGG
TTGGTTTTCTCTTGTTGAGCTTGAAGCAGGAGTAAGTGAAATATCTTTAA
CCCATTTTGAGAACTGCATGATTCCGGAAGACATCCAGGTCAAATCACCC
TCAGGAGATAAGTCTTGTGTGCAAAACGATGGCACTTTGCTCAGGAGTAA
TATTCATGAGCATAGTTCAATAGATCACTCAGCACTGCTGCATATTACAC
CATCTGGTACAGGCAAGATCACTGAGGTTTCAGAGCAGAAAACCTCTCAG
TTTGGCAGCCAGAAGCAAGTGCGGGTTCCTGCAACTCAAGCTGTTGAGGA
TGATCAAGGAATGAATTGTGCTGCCATATCTGAAGGAGAGTGGGCAGATA
CCCTTACTGATATCAGTGTTGGGTACTTACTGACTGAAGCATCCAAGGGC
ACTCATTTGGATTGCATAGGAACTTCTAGTGTCAAAAATGCTTTGCTCCT
TGAGAATCCATGCAGCTATGACTCGTTTGATGCTGCCATTGCTCTTCATG
TTTCTCGTTTTCAAGCATCAGAGCAGCCAGCCCATACTCCCCATTCAACC
ATCTGGGGAGGAGAAGAAACATGTGATGAGTTCAGTTTTAATTTGTCATC
CTCCATGAAGCAAGAACGCTCAAACACTCCTTCTAGCAGCTCTCCTGGTA
CTGACAATGAAGTTCATCCATTAAACTCGGAAGGGTTTCAAGGTTTTCTT
CAGGACTTGACTGGAGGAGAGGCTGCTGCTGAGAATCCTTGTAATGATGA
TGGCAAAGATAGAGTGGAGTTTTGTGCAAAATCGCCGCCTCGAAATGACG
ACACTAAGGAATTAAAGGATCAATCTCTAGCTGACATATATTGGAGTCAG
GAGGCGGTGAACCCGAAGGCGTACCCGCTTGCGGATGCGCAGATGACCAT
TACTATCCTCGAGCTCATCCAGCAGGCCGCCAACTACAAGCAGCTAAAGA
AGGGCGCCAACGAAGCGACGAAGACCCTGAACAGGGGGATATCGGAGTTC
GTGGTGATGGCGGCGGACACCGAGCCCCTCGAGATCCTTCTCCACCTTCC
TTTGCTAGCTGAGGATAAGAACGTGCCATATGTGTTTGTTCCATCTAAAC
AAGCTCTTGGTCGCGCTTGTGGTGTAACAAGGCCTGTTATTGCTTGCTCG
GTGACCAGCAATGAGGGTAGCCAGTTGAAAACGCCAATTCAGGAGCTCAA
GAACAATATTGAGAAGCTTCTCATCTGA
>Pgl_GLEAN_10024234 PgMYB146
ATGGCGGTGCCGAGCGAGGCGGCTGTCGTCGTCGTCGACGGCGTCCAGCC
GGGTCCGGCGGCAGTGGTGAAGAAGTCGGCGTGGACCAAGGAGGAGGACG
CCGCGCTGCGGGAGCAGGTGCGGGTGCACGGCCCGCAGAACTGGGCGGCC
ATCAGCGACGCGCTGCCCGGGCGCAACCCCAAGTCGTGCCGCCTCCGCTG
GTGCCAGCACTTGACCCCCGGCGTCGACGCGGCGCGGCCCTTCTCCCCCG
AGGAGGACGAGAAGATCGCCCAGTACCATCGCATGTTCCCCAACAGGTGG
GCCACCATCGCCTACTTCCTCCCCGGTCGCTCCGACAACGCCATCAAAAA
CCGCTGGAACTCCGTCCTCGGCAAGCAGCCGCAGCCGCAGCCGCAGCAGC
AGCAGCGGCGGGTGGTCGCTGCCCCCCTCCTCCGCCTCTCCGACGGGACG
CTCCCGCTGTTCCCTCTCGCGTCCGGGGATGTCAGGGCGTTCGGCAGGGG
CGTCCCGGTGCTCCACCGTCTGCCGCACGTCGACGCGGGGGTTGATCTGA
GTGGCGCGTGCCTGAAGCTGTTCCCGCTGGCGCCAGGCGATCTCGTCGGG
GGCGACAATCCGAGCGAGGCGGCGGGGATGGATGTGGATTGCAGTGCCGA
CGACCAGACGGTCACCGAGATGACGCTCTTGCCGAGCACGAGGGCCGCTT
CGATGGCCGCGTTCAAGGCGATGGTGCAGGCAGTTCGGGCGCCCTAG
>Pgl_GLEAN_10014410 PgMYB147
ATGGCGGCGGCGGCGGAGGCGCGGGGACCGGACTTCCCCGTGGGGATGAA
GGTGCTCGTGGTGGACGACGACCCGACGTGCCTCGTCGTGCTCAAGAGGA
TGCTCCTCGAGTGCCGATACGACGTGACGACATGTCCTCAGGCTACAAGA
GCCCTAACTATGTTGCGAGAAAATAGGCGTGGTTTTGATGTTATAATAAG
TGATGTCCACATGCCAGATATGGATGGATTCAGGTTACTTGAACATGTAG
GCCTTGAGATGGACCTTCCAGTTATTATGATGTCTGCTGATTCAAGAACG
GATATTGTGATGAAGGGAATAAAACATGGTGCATGCGACTATTTAATAAA
ACCAGTCAGAATGGAGGAGTTGAAAAACATCTGGCAACATGTAGTTAGGA
AAAAGTTTTCTGAAAACAAGGATCATGAGCATTCAGGTAGCCTTGATGAT
ACTGATCGTAACAGAACAACCAATAATGATAATGATTACGCTTCCTCTGC
AAACGAAGGAGGCGATGGTAGTTGGAAATCTCAGAAAAAGAAAAGAGAGA
AAGAAGAGGATGAAGCTGACTTAGAAAATGGTGATCCTTCCTCTACATCG
AAGAAACCAAGAGTTGTTTGGTCAGTCGAGCTTCATCAACAATTTGTAAA
TGCAGTCAATCACCTTGGGATAGACAAAGCTGTTCCAAAGAAAATTTTGG
AGTTAATGAATGTCCCTGGCTTAACTAGGGAAAATGTTGCCAGCCATTTG
CAGAAATTCAGACTCTACCTCAAGAGAATAGCTCAGCATCATGCTGGAAT
ACCTCATCCATTTGTTGCCCCTGCTTCTAGTGCTAAAGTTGCCCCACTAG
GAGGACTGGAATTCCAGGCTTTGGCTGCTTCTGGTCAGATCCCTCCTCAG
GCTCTGGCTGCTTTGCAGGATGAACTCTTAGGTCGACCTACAAGCAGTTT
GGCGTTGCCTGGAAGGGACCAGTCATCTTTACGACTTGCTGCAATAAAAG
GAAACAAGCCCCAGGGAGAGAGAGAAATAGCATTTGGTCAACCCATATAC
AAGTCTCAGAGCAACACGTATGGGGCATTCTCTCAAAGCAGCCCAGCAGT
TGGAGGATTGCCATCTTTTGCAGCCTGGCCCAATAACAAACTTGGTATGG
CAGATTCACCTAGCGCATTGGGAAATGTGAGCAACCCTCAAAATAGTAAT
TTGCTGTTGCATGAATTGCAACAACAGCCAGACACGTTGCTGCCTGGAAC
CCTTTACAATATTGATGTCAAACCTTCTGGCATAGTTATGCCTTCTCAAT
CATTGAATGCATTCCCAGCTAGTGAGGGTATCTCGCCTAATCAAAATCCC
TTGGTCATACCTTCTCAATCGCCAAGTTTTCTGCCATCCATTCCTCCATC
CATGAAACATGAACCTCTGCGTGCATCATCTTCACCATCAAACAGTCTGC
TGGGTGGGATTGATATGGTTAATCAAGCATCAACAAGTCAGCCTTTGATT
AGTACTCATGGAGCAAATCTTCCTGGTCTAATGAACCGCAGCTCAAATGC
CATGCCTTCACCAGGAATTAGTAATTTTCAAAGTGGGAATAATCCTTATA
TGGTTAATCAGAATGCTATGGGAGTTAGCTCAAGACCACCAGGTGTTCTA
AAGACTGAGAGCACTGACTCGCTGAGTCGTAGTTATGGCTATATCAGTGG
CGGCACCAGTGTGGACTCCGGCTTGCTATCTTCTCAGACCAAAAACCCAC
AGTATGGTTTATTACAGAGTCCAAATGATGGTACCAGCAGCTGGCCTCCT
TCACAAGATATTGATAGTTATGGAAATACCCTTGGGCAAGGTCACACTGG
CTCCACTTCATCTAACTTCCAGAGTTCCAATGTGGCCCTTGGGAAGTTGC
CTGATCAAGGACGAGGGAGGAATCATGGGTTTGTCGGGAAAGGTAATTGC
ATTCCAAGCCGCTTTGCAGTGGATGAGGTTGAGTCTCCAACTAACAACTT
GAGCCACAGCATTGGAAGCAGTGGAGATATAGTGAACCCCGACATTTTCG
GATTTAGTGGACAGATGTGA
>Pgl_GLEAN_10009509 PgMYB148
ATGGACGCGATCAGCAGCCTGATGCTGCAGGAGGGGTGGAGGAAGGGGCC
ATGGACGGCGCTGGAGGACAGGTTGCTCACCGAGTACGTGCAGCAGCACG
GCGAGGGCAGCTGGAACTCTGTCGCCAAGCTCACAGGGCTGCGCCGGAGC
GGGAAGAGCTGCCGGCTCCGGTGGGTGAACTACCTCCGGCCGGACCTGAA
GCGGGGCAAGATCACACCCGACGAGGAGACCGTCATCCTCCAGCTGCACG
CCATGCTCGGCAACAGGTGGTCGGCGATCGCGCGGTGCCTGCCGGGGAGG
ACGGACAACGAGATCAAGAACTACTGGCGGACCCACTTCAAGAAGGCCCG
GCCGTCGCGCCGCGCCCGGGCCCAGCTGCTCCACCAGTACCAGCTCCAGC
AGCAGGAGCAGCGCCGCCAGTATCTCCACCTCCTGCAGCAGCAGCAGCAG
CAGCAGAGCCAGCAGCTGCTGCTCCAGCAGCAGAGCCACCAGCTTCTGAT
GGGCCAGCAGCTGCAGGAGCACCAGAGCCCGCCGGAGCACGACGACCACC
AGGCGACCGTCATGGCGGCGATGGTGAACAACCTGCAGGGCACGGATGAG
TGCTCCTGCAGCCCGGCGTCGACGGCCGAGCACTGCACGATCCCGGACGA
CGACGACGCGCTGCTGTGGGACAGCCTCTGGAGGCTGGTCGACGGCGATG
GCTGCGGTGACGGCTCCAGCGGTGGCGAGTACTAG
>Pgl_GLEAN_10037679 PgMYB149
ATGGTGAGGACGGTGGTCGGCCGGGAGAGGAGCGGCGGCGTGAGGCAGTA
CAACAGGTCCAAGGTGCCTCGGCTGAGATGGACCCCCGATCTGCACCATT
GCTTCGTCCACGCCATCCACAAGCTCGGAGGCCAGGACAAGGCTACGCCG
AAGCGAGTTCTGCAGCTGATGGGAGTAGGAGGACTCACCATATCTCATGT
CAAAAGCCACCTGCAGATGTACAGAAACATGAGAAACGAGCTTGGAATAA
TGCAAGGGTCGATGCAACAGCTGGTGCACCGGGCGGATCATCAGGAGCAC
ATACTATACTACGACGGAAGCGGCGGCATGCACAAACAACTCTGCAATGG
CATGCGGCAGCAGCATCGCGATCATCATGAGTGCGATGGCCCCTGCTGCT
GCCGCCACTCGCCAAAGCCTCGGAAGGAGGAGCCAACGCCACTACTGCTT
CACCCCCAACTGAAAAGGACGGAGGCGAGGCGTGATGAGGAGGCCGATTA
CGGGAGCGGCGGGAGCCCCAAGAGCCTGCTGCGAGGCCCAGGAGGACCAG
GAATATGTGAGAGCGATGGGTCATGGCGCCGCGCCCTCGCAGCAGGTGGC
TACAACTACATGCGCATCATGCAAGCGGCCATGGGGGGCAGCATGGCTGC
TGCTGCTTCTGCTCCTCCTCCGGAGGTGGTGGTGGAGCCCTGCCGGGGCG
GCGCGGGAATAAAGCGGCGGCAGCGAGCGGACGGCGAACGCGCTCCTCCT
CCTCCTCCTCCTCCTCCTAGCAGCAGCAAGGCCTTCACATTCTTGGGCTT
CGTGGTGGCGCCGGGCCCTCCTCCTCCTCCCCCCCAACCCGTCGTCGCCT
GCTGCAGCAGCAGCAGCAGCAGCAGCCGTGACCACCCTTTTGAGGTATGC
ACAACACAACACACCACTGCACTGTCTGTCTCCTCTCTCGATCATCGGCT
ACGACGACGGCGCGCGGCTTGGGATCCGCCATCGCTGCTGGGAGACGAGA
GAAAGCGAGTGATCAGGGGGGGGACAAACCGCATGGATGGACGGATCGTC
GTCTCAGGGCCCGCGCCGATCACTACTGCTCCTTTTTCTGCAGTGCCGTG
TTTTTGTCCTAGCTCGCTACTGCAGCGCACGCGTGTTCCCTCCCGATCGA
GTTCCCTCCCCTAG
>Pgl_GLEAN_10001419 PgMYB150
ATGGGCGAGGAGGCCGTCGACGACGACTACGACTACCAGTACCAGTACCA
CCAGCTGGGCCTGCCGGGCGGCGGCGGCGGCGACCGTGTGATGGAGTGGG
AGGCGGGGCTCCCCGGCGCGGATGAGCTGACCCCGCTGTCCNNNNNNNNN
NNNNNNNNNNNNNNNNNNNNNNNNNNNNNNNNNNNNNNNNNNNNNNNNNN
NNNNNNNNNNNNNNNNNNNNNNNNNNNNNNNNNNNNNNNNNNNNNNNNNN
NNNNNNNNNNNNNNNNNNNNNNNNNNNNNNNNNNNNNNNNNNNNNNNNNN
NNNNNNNNNNNNNNNNNNNNNNNNNNNNNNNNNNNNNNNNNNNNNNNNNN
NNNNNNNNNNNNNNNNNNNNNCGCCGCAGCCGCCGGCACGAACGCCGGCA
CGAACACCGGCACCAACAACAACACCACCACCAGCAAGCGCCCTCGCCTG
GTGTGGACGCCGCAGCTGCACAAGCGGTTCGTGGACGTGGTGGCGCACCT
GGGCATCAAGAGCGCGGTGCCCAAGACGATCATGCAGCTGATGAACGTGG
AGGGCCTGACGCGGGAGAACGTCGCCAGCCACCTGCAGAAGTACCGGCTG
TACGTGAAGCGGATGCAGGGGCTCTCCAACGAGGGCCCGTCGCCGTCCGA
CCACATCTTCGCGTCCACCCCCGTGCCCCCCAGCCTCGTCCTCCACGAGC
ACCAGGTGCCCTACTACCACCACCCCCACCACTACGCCGGCGCCGCCGGA
TACCCGCAGCAGGCCTACCACCACCACCACCACCACCACCACGCCGACAA
ATAA
>Pgl_GLEAN_10022172 PgMYB151
ATGGGCAGGATGTGCGGCGGCCGCGCCGGCGGCGAGCCAGCGGTGCGCAA
GGGGCCGTGGACGCTGGAGGAGGACCTGGTCCTCGTCGGCTACGTCTCCC
ACCACGGGGAGGGCTCCTGGGACAACCTCGCGCGCTCAGCTGGGCTGAAC
CGGAACGGGAAGAGCTGCAGGCTGCGGTGGCTCAACTACCTGAGGCCAGG
GGTGCGGCGCGGCAGCATCACGCCGGCGGAGGACGCCGTGATCCGGGAGC
TCCACGCGACGCTGGGCAACAGGTGGTCCAAGATCGCCACGCACCTTCCC
GGCCGCACCGACAACGAGATCAAGAACTACTGGAGGACCAGGGTCCAGAT
AAGACGACCGGCGGCGGCGGCGGCCAAGTACACCCAGCAGCAGCAACCGT
ACCGCGCGCCTGCTGCGGCTGCGCCGACGACGACGGCCATGGCCGCCAGC
GAGGGCGCCGCGTCGTCATCGTCGTCGCCTGCGTCGGCAAACCATGGCAG
CAGCAGCTCCGCCGCCGGGGACTACTACTACTGGTGCATGAAGCCGCCCT
ACAACGACCCCGATCAGCAGGGAGCCTACCACTCCCAGAAGACCGTGGCT
TCTGCAGCGGCGCAGGACAGTTCGTCCACTTCCACCACCACCGCCGGCGA
CGCGGGGTGCAAGCTGACGGGTTACAGTCACCCCTACTACTCCGAGATGG
GCTCGTCGGTCGCCGACGGCGTGAAGATGGTCGACGCGGACAACTTTTGG
AATGTCGTCGACAACTTCTGGGGGACTTTACCGGTTCCAGATGCTACATT
CTGA
>Pgl_GLEAN_10022161 PgMYB152
ATGGCGTCGATGTCGATGAGCTCGGCGAGGCCGCAGTGGACGAAGAAGCA
GGACAAGCTGTTCGAGCAGGCGCTGGCGGTGTACGACAAGGAGACGCCGG
ACCGGTGGCACAACATCGCGCGCGCCGTCGGGGGAAAGTCGGCGGAGGAG
GTCAGGCGCTACTACGAGATCCTGGTCGAGGACGTCAAGCGCATCGAGGC
CGGCAAGGTGCCCTTCCCCGCGTACAGGTGCCCCGGCGGCGGCGCCCCCG
CCAACATGACCATGGGGGGCTACTAG
>Pgl_GLEAN_10022160 PgMYB153
ATGGCGTCCAACTCGACCTGGGGCTCCTCCTCATCGTCGTCTGATCATTG
GACGCGGCAGGAGGACAAGATGTTCGAGCGCGCCCTGGCGGTGTACGACA
CGGACACCCCAGACCGGTGGCACAACGTGGCGCGCTACATGGGCGGCACC
AGGTCCGTCGAGGAGGTGCGCCGCCGCTACCAGCTGCTCGTCCGGGACGT
CGAGCAGATCGAGTCCGACGGCGTGCCGTTCCACTGGTACGCCGCCGCAC
CGCCGCCGTCGAGACTGCAGCGAGGTATACACCGGTCGTCGTCTCCCCGT
TAA
>Pgl_GLEAN_10010463 PgMYB154
ATGGCCCTGGCCGACGCCACCGCTTTCCCCTACGGGCTGCGCGTCCTCGT
AGTGGACGACGACCCGACCTGGCTCAAGATCCTGGAGAAGATGCTGAGGA
AGTGCTCCTACGAAGTCACGACATGCGGTTTAGCCAGTGTTGCCCTCCAG
ATTCTCCGGGAGAGGAGAAACAAGTTTGACATCGTAATAAGTGATGTCAA
CATGCCTGACATGGATGGTTTCAAGCTTCTCGAGCACATTGGACTTGAGA
TGGATCTACCTGTTATAATGATGTCCATTGATGGAGAAACAAGTAGAGTG
ATGAAAGGTGTCCAGCATGGTGCTTGTGACTATCTCCTCAAGCCTGTTCG
AATGAAAGAACTTCGGAACATCTGGCAACACGTGTATAGGAAGAAAATGC
ATGAGGTGAAAGAGATCGAAGGTAATGACAGCTGTGACGATCTCCAAATA
TTTAGAAATGGCTGCGAAGGATTGGAAGAGAGGGGCTTATTTATGAGGGC
TGACTCTGATAGTATGAGGAAGAGAAAAGATGTTGATAGCGCAGATCAAG
ACTCAAGTGATGGCGCTACCGTTAAGAAGGCTAGAGTTGTCTGGTCCGTT
GATCTTCACCAGAAGTTTGTTAATGCAGTGAACCAAATTGGATTTGACAA
AGTTGGGCCGAAGAAAATACTGGACCTAATGAATGTTCCTGGCCTGACAA
GGGAGAATGTAGCCAGCCATCTTCAGAAATATCGCCTATACTTGAGTAGG
TTGCAAAAGCAGAATGAGGAAAGGATAATGGGTGCTGCTAGGCAAGATTT
CAGTCACAAGGGAGCACCAGATAACCTTAACCTCCGAAACTCCTTCCAAG
AGCAACCTAGCAATGGCACCAATGATTTTCATCATACTTCTCAGAAGATC
CAAGCTCAGAGCAATCTGCTCGATTCTCATTTGGAGGATACAAAGATCGT
GGCACCCTTGAAGATGTCAGACAAAATTGGAACCCCAGTAGGTGATGTTA
TTGATCCTCAGAATGTCACCAGTGCCTCACCTCTAGGTGGGGTGGTCTCT
TTTGAAAGAATGCCACTGAATCCGGACAGGAAGACATCGGAAACCATGAT
CTTGGAATGTCAGTCCTGGAGTGGAAATGTGCCACCAAAGCAGTTCATGC
AGTACCCGAAGCATAACCATGAACGCTGCGACCTGCTAGGAGACTATTCT
TGCCTGCCCAAACCAGACTTAGAGCACTCAATCACCCCTGGTCATCTATA
TGTCCCACCACCGTTAGTATCGATGAGTTGCAGTATGGAGGCGGATGTCA
GAGACTTCTCAGATGTAAAACCAGACCTTCTTGGCTGTATGAAGTCCTTA
TCACCGGCACTGACGTGTACAGTCGATTCAGTTTCTGCTCAACTTAGTGA
CAGTGTTGTGACCTCAACTAACACCGACCCGAAGTTTTCCAGTGTGGAGG
GGTTGTCCAGCAGTAAAGATTGTCTTTTTGATCTGGCAAGGAACCAAACC
ACTTTGCTTAATTCAGAAGAGGAAAGTATCATATGCCGCACTGATTTGGC
TTGTCTACCTGATGACCTCTCCGACTATCAACTTCAAGGTATAGGATTGA
ATAACATCGATTTGTTTCAGTGCAATGATGCAATGATGCTACATGGACTG
CAGAATAACTGGTATGATGATCCAGAGCCTAGTAGTGAAATAATGGAGTT
TCCGTTGCTAGACGGATGCCTATTTGCATAA
>Pgl_GLEAN_10031693 PgMYB155
ATGGGGAGGTCTCCGTGCTGCGAGAAGGCGCACACGAACAAGGGCGCGTG
GACAAAGGAGGAGGACCAGCGCCTGATCGCCTACATCAAGGCGCACGGGG
AGGGGTGCTGGCGCTCGCTGCCCAAGTCCGCCGGCCTCCTCCGCTGCGGC
AAGAGCTGCAGGCTCCGCTGGATGAACTACCTCCGCCCGGACCTCAAGCG
CGGCAACTTCACCGACCAAGACGACGAGCTCATCATCAAGCTCCACGCCC
TGCTCGGCAACAAGTGCTCCAAGGAACTGAGAGGAATAATAATGCGGATA
GCACGGTGTGGCAAGTTAGGCACCGGAGAATTTTTGGAGAAACTGACATG
GCCTTAA
>Pgl_GLEAN_10020208 PgMYB156
ATGGATTTCCAGCACCAGCAGCAGCAGCAGCACCACCACCATCTCCACCA
CCACACCACCGTCCTCGCGGCGGGGCCCCCGGCGGTAGCGGCGCGGCCGT
GGAGCAAGGCGGAGGACAAGGTGTTCGAGAGCGCGCTGGTGGTGCTGTTT
CTTCAAGGGCTGGAGAGGTACGGGCGCGGGGACTGGCGCAACATCTCGCG
CTTCTCGGTGCGGACCCGGACGCCGACGCAGGTCGCCAGCCACGCGCAGA
AGTACTTCAACCGGCAGCTCAACCCCGCCAGCCGCGACTCCAAGCGCAAG
AGCATCCACGACATCACCACCCCCTAG
>Pgl_GLEAN_10020166 PgMYB157
ATGGCGTTTGAGGAGTCCGCTGTCTTCAACCGCGTGATTGCATCAGTGTT
GGCAGGGGATGAAGTGGCGTTGAGTTACCTTGCGAGATCTAGCCATGGTG
GTCCTCGATTCGAGCACAATCTGGTGGCACCTTCATGTATTCAAGTTGGT
GGTGCTCAATCCATGGGCAGCTACCACGATGTGAGCTCCCTTGTGGCTGG
TATAGGCATGACTCCAACCGGATTTGAAATGCCAGAAGGGGATATTACGG
CCGACAACTACAATGCTCTTGGTGGTGTTCCGATTGATGTTGCGGTGGCT
CCACAGTTGGAAATCGGAAACGACGTCAAGCCAGCGCCCTTCAAGGGAAC
TTGGACAGAGGAAGAAGATAGAATTTTGAAGGATATGGTAGTGCAACTTG
GGGAGCGCAGTTGGTCGGTGATAGCACAATATTTGCCCGGTCGGATTGGA
AAACAATGTCGTGAGCGATGGATCAACCATTTACATCCTGACATTAAGCC
CAACGACATGTGGACAGAGGAGGAGGACAGGATCCTTATTGGAGCTCACA
GAAACTTTGGAAAACGCTGGTCGTCAATATCAAGGTTCCTCCCAGGCCGA
TCAGAGAACGCCATCAAGAATCGCTGGAACGCAACCGAACGCAGTCTGAA
GTCGAAGCGCCGCTTGAAGAAGAAGAGGAGCGAACAGGTGCCACCCGGTC
AGCTTTCCATCCTGGAGGAGTACATCCTCAGCGTGTCCCCGCTCTCCGAG
TTTGCATCACCGCCGCCGCCGGTGTCCCCGCCGCCCCAAGGCCTAGCGTA
CAATGGGCCCGTCGTCGATCCTGAGGCTGTTCACTCACTGGCTCCCCAGA
TGGAAATGAACTACAATGCCGCCAACCCGCCCGGGCCAGCATCTCCTCAC
CTGCAGGGGATGCTTAATTCCAACATGCCGTTGCTGCCAGACCTGAACAT
CAGCTATGATCCACAAGAGGAGTACCACTTGAGCTATCCTATGTGCACTC
CCGCGCCGCCGCCGCCGCAACAGATCGTTACTCAAGACCCTCAGCAAGCC
AGCTTTAGCTGGTTCCCGTTTGCTGAATACCACAATGCACTGAACCCAGA
GTTTGCAATTGGTTCCTCGTACTACTATACTGGTGGATACTATAACAGTG
AAGAAGGGCCTAGCAATGCCGGTGCAAATGGCTACTACAGTGAAGAAGGG
CCTAGCAATGCCGGTGCAAATGGCTACTACAGTGAAGCTGCAGGGCCAAG
CAACACCTGCGCAAACAGTTACTACAGTGAAGCAGGGCCCAGCAATGCCG
GCGGCAGTGGCGGCGAACCAGCTGTTGACAATGACAACATCGCTCGGCCG
GCGACGTCCGAGGATTTCATCTCCAATGATGACGTGAATCTTGATTTCTC
CAGGTTCGGGTGA
>Pgl_GLEAN_10032441 PgMYB158
ATGATGGCGGAGGCGTGGGCGCAGGTGCTGCTGCCGTCGACGGCACCCTG
CTTCTCCGGGCAGCCGTCCTGCTTCTGGCAGGACCGGAACGCGGGTTTCG
GAGGGATAGGGGACGGGTGGACGGCGGAGGAGAACAAATTGTTCGAGCAG
GCGCTGGCGCGGATCGACCGGAACGCGCCGGACAAGTGGGAGAGGGTGGC
GGAGATGCTGCCCAAGAAGACGGCCGTCGACGTGATGAACCACTACCACG
ACCTCGAGTACGACGTCGGCTTCATCGAGGCCGGGCTCGTGCCGTTCCCG
CACTACAGCAGCTCGCCGCCCTCGTCCGGGTTCACCCTGGAGGATTGGGA
CGGCGGCGACGGCGGGTTCAGGCGCGGCTACTGCCTCAAGCGGGCGCGCG
GCCCCGACCAGGAGCGGAAGAAGGGCATCCCCTGGACGGAGGAGGAGCAC
AAGTTGTTCTTGATGGGGCTTGAGAAGTACGGGAGAGGGGACTGGAGGAA
CATCTCGCGCAAGTACGTGACGTCTCGGACGCCGACGCAGGTGGCCAGCC
ACGCGCAGAAGTACTTCATCCGGCTCAACTCCGGCGGCAAGGACAAGCGG
CGCTCCAGCATCCACGACATCACCACCGTGAACCTCACCGACGAGGACCG
CGGCAACGCGTCGCCTCCGTCCGCCGCCGCCGCCAGCCCTTCGCCGCGCC
GCTCCCGGGCGTGCTCGGCGTTGCGCACCCCTACGGCAGCGTGA
>Pgl_GLEAN_10032472 PgMYB159
ATGTCGGCGGCGCCCGAAACTGCCGTTTCGCCGGCGCCGCAGCCGGAGCC
GCCATCGGATCCGCCCGTCGTCTCCGACGCCGCCCATTCCAACCCTGCCC
CCATGGAGGTCGATACGCAAACCCTAGCCGAGCCTCAGCCTCAGTCCCAG
CCACAACCGACCCCCTCGTCCCCACCTCCTTCCGGGGAGGACGACGACGT
GGTGGCTGTCTCCGGTGCTTCGGTTGGTGGCGACGCTGCGGATTCCGCTG
CGGCGGCGTCTAACGCGACCGCGGAGGAGAGGGTGAGGGGGCCATGGTCC
CCGGAGGAGGACACGGTGCTGAGCAACCTGGTGGAGAAGCTCGGTGCGCG
GAACTGGACCCTGATCGCGCGCGGAATCCCGGGCCGCTCCGGCAAGTCCT
GCCGCCTGCGCTGGTGCAACCAGCTCGACCCCCAAGTCAAGCGCAAGCCT
TTCACCGAAGAGGAGGACCGGATTATAATTGCCGCTCATGCTATTCATGG
GAACAAGTGGGCATGTATCGCAAAGCTTTTGGATGGGAGAACCGACAATG
CTATCAAGAACCACTGGAATTCCACTCTGAGACGTCGATACTGCAATGAT
GGCCGATGCAAACATGGTGGTTCTGTGGAGAGAAGTATCCCTGAGGTGTC
CAGGGCAGTTTCAAAAGAACCTTGGCCTTCAAAGGATCTTAGTTCCTTCA
CCGCTATGGATGTTAGGGATGCTCCTGTGAAAATAGTTCCTGAAACATCT
GCTGGGGCATGGCACGTTGCAGATCAGTATTATAGTACCCAGGCTGTTGA
TCCACCCTACCTATCCCGACCAGCTGCAAAGATTGGTGCTTTCAGACCGT
ACAATCCAGGACCTGCAGAACCTACCCAACAGGAAACACCAAGTTCTGTC
TTCAAGTTTGACTCAACTCTTAAAGCTCTGACTCCTGAAAGTGAGGTATT
CAAGTTTGCTGGTCCTACATACTTTGCTGCTGAGGTTCCAAACAAATGTG
GGCATGGTTGCTGCAGCACCCATCAGCGGCCTCATAAGAACTCCTTGCTG
GGTCCTGAGTTCAATGAGTTTGAAGATCATCCACCAATTTTAAATAGTAG
TTTTGCTTCATTGGTATCAGAAATTAGCAGCATTGCCTGGATGAGAAGTG
GTATGCAAAGTGGTGATGCCAGTAGCTTATTGCAGTCAGCTCCGCCAGGC
GCCAGCCTGACAAATTAG
>Pgl_GLEAN_10007906 PgMYB160
ATGATGAGCGCCAGCGCCGTGGCGATGCGTGCGGAGATGGGCGGCGGCTG
TGGGGAGGAAGAGCTGGAGGACGACCTTGATGCGCTGCTTAGTTCCGGCG
CCGGTGGTCAGTGGCGGCGCCCGGCAGACGCGGGGGAGAGAGAGAGGGAG
CGGGAGCTCAGCATGTTCAGGAGTGGGTCAGCGCCGCCGACCATAGAGGG
TTCCCTGAACGCCATCAGCGGCCTTCTCCGCAGCGACCCGGAGGCAGCCG
TGACGGCTGCCCCGATTCCTGTTGCTGAGGCGTTGAATGGGCATGGTGGC
CTCCTCTCGGATGAGGAGCTCCGAGCCGACCCAGCCTACCTGTCGTACTA
CTACTCTCACGGAAATCTGAACCCACGGCTGCCGCCTCCGGTGCTATCTA
AGGAGGATTGGCGGTCAACCCAGCGCCTGAAAGCCGGGGTGGTTGGGGGG
ATTGGGGACAGGAGGAAGGTGGGGCAAGAGGACACGGTACAGGGGACGGG
GACTACAGTGGGTAGGTCTCTGTTTTCGCAGCATCCTGGTTCTGAGCAGC
AGGAGGAAGCCAGGATTGATGGTGGTGGTGGTGGTGGTGGTGGTGCTGAG
TGGGTCGATGGTGGAGGGGATGGACTCATTGGTTTATCGCTTGGGCGGCA
GCGTAGCTTCGCGGATATCCTGCAGGACAATATTGGGCGCAGAACACCTA
CTTCAGAGCATCCCTCCCGTGCAGCCAGTCGCAATTCTTTTCTTGACAAT
CAAGAACCACTGGATTCTGCCGAGAACCAATATTCGATGCACACTGATAT
TTTGGAAGTGCAAAATGTCTGTGCTCTTCACAGTCTTAATGCATCCACAT
CTCAGACGTTTGCATCTATTCTGGGACCATCTGTTTCCAGAAATGCTACA
CCAGATCCTCATTATGTTGCAAGGGTTCCTAGTCCTGGCCTTCCACCTGT
TGGTGTTAGGATTACTTCCAATGAGAAGAAACTGAATTGCTCCTCTTCGC
ATTTCAACACTGTATCCTCAAAAGCAGTTGGGGCTGATGATATTTTATCT
GCATTGTCAAGCATGAACTTATCGAAAGGTGGTACCTTGAATGGTAATAA
CAACATCAGTCGATCAAACTTTCAGAGAGGCACAAGTGATCAGCAGAAAT
TTTCTCTTGACTCACATGCTGAAGTTGCCCAAGTGAATAATAAGCAGCAT
CCTGTGATATTAGGAACTGATGAATATTTGGGTATGCCATCAATGTCACA
ACCATATAATACTTCTTTTGCTGACATTAACAACAGCATGGCTGGTTTGG
CAGAGTTAAGAAATAATGCCAACACAAGATCAGATAGACATTTGGATATG
CAAAGGTCTTCTAATTTATCTGCTCGTTCATATCAGAAGTCTCCATCATC
TTCTAATGAAAGCCCGGGTGGTTCTCCTGCTCAACATCAGAATTTTGATG
GTATAAATTCAGCCTATTTGAACTATGGACTTAGTGGATATCCACTCAGC
CCAGGTTTGCCTTCTATGATGCCCCCTTTGTTTGAAGGTGCTGCTGCTGC
ATCTGCTATAGCTTCACTTAGTGCAGATTCAAGAAACCTTGCAACCAATA
TTTTAGCTTCACCTACGTTGAGCCTAACGGATGTTCATAACCTTGGTCGA
GGTGGTAATCAAGCTCCCACAGCCGCAGGTCTTCAGTCTCCTCTTTCTGA
TCCGTTTTATGTACAGTACTTGAAGGCAACACAGTATGCTGCACAAGGAG
CTGGCAGCTATGGTGATCCTTCCTTGGAAAGAGGTTACATGGGTAACTCA
TATGGTAATTTAACCGCAGTTCAAAAGGCTTATCTTGAAGCTTTGCTTCA
GCAGCAGAAACAATTTGAAATGCCACTTTTAGGTAAATCAAATGCTTCAA
GTCAGGGGTACTATGGCAATTTACCTTTTGGCATGGGCATGGCATACTCA
GGAAGCCCATTAGGCAGTCCAGCCGCCTCTCCATCTGGTCCTGGCAGTCC
ACTAAGGCTTGGTGAGCGGAATCTTAGGTTTCCGTCTAACTTAAGAAACT
TGGGTGGATGGACCTCTGATCCAAGTGGCTACATGAATGAGAACTTTCCA
TCCTCACTTTTGGATGAGTTTAAAAGTAACAAGGCGAGAAGTTTCGAGCT
TGCTGAGATCACTGGGCATGTGGTTGAGTTTAGTGCTGACCAATATGGAA
GCCGTTTCATACAGCAAAAACTCGAAACTGCAACAATTGAGGAAAAGAAC
ATGGTCTTTGAGGAGATCATGCCTCATGCACTATCATTGATGACTGATGT
ATTTGGAAATTATGTGGTACAAAAGTTTTTTGAGCATGGAAGCGCAGAAC
AGCGGAGGGAGTTGGCTGATAAACTGTTTGGCCATGTATTAGCTCTCAGT
CTTCAGATGTATGGATGCCGAGTTATCCAAAAGGCAATAGAGGTGGTTGA
TCTGGACCAGAAAACAAAGATGGTTACCGAGCTTGATGGTCATATCATGA
AATGTGTACGTGATCAAAATGGAAACCATGTCATCCAGAAGTGTATTGAA
TGTGTCCCAGAAGATTCTATTCAGTTTATAATATCAACATTCTATGGTCA
TGTTGTTCCATTATCCACCCATCCTTACGGCTGCAGAGTCATTCAGAGAG
TACTTGAGCACTGTGCTGATCCAAAAACACAGCAAATAGTCATGGATGAG
GTATTGCAATCTGTATGCATGTTGGCACAGGATCAATACGGAAACTATGT
TGTGCAGCATGTTTTGGAGCACGGGAAGCCTCATGAACGATCCATCATTA
TCGAAAAATTAGCTGGACAGATCATTCAGATGAGCCAACAGAAATTTGCC
TCGAATGTTGTTGAGAAGTGTCTAACATTCGGCGGACCTACAGAGCGAGA
AGTTATCATAAATGAAATGCTTGGAACCACTGATGAGAATGAGCCTTTAC
AGGCCATGATGAAGGATCAGTTTGGTAACTATGTTGTACAGAAGGTACTT
GAGACTTGTGATGACCAGCAACGTGAGTTGATCCTGTCGCGGGTGAAGGT
CCACTTAAATGCTTTGAAGAAATATACATATGGGAAGCACATAGTTGCTC
GTGTAGAAAAACTTGTTGCTGCTGGTGGGGATTCGCATCTGCGATGCCGC
CAAGGGCGGCATGTGAAGGTCTGGTCGTGTACCCACAAGCCACAACTAGC
TCTCAAGGAGCACGTCCCGCAAGACTACGAGGAGGAGGAGGAGGAGGTGG
AGGAGGAGAGAGAGGGGGAGGGGGAGACCGAGGACGCCGCCGCCTTCGGG
AGCGGCGCGTGCAGGGGCGGGAGGCCCGGGAAGAAGACGAGGATGGTGTG
GACGCCCGAGCTGCACCACCGCTTCGTCGAGGCGGTGGCGCACCTCGGCG
ACAAGGGCGCCGTGCCCAAGGCCATCGTGCGTCTCATGAACGTCGAGGGC
CTCACACGAGAGAACGTCGCCAGCCACCTCCAGAAGTACCGCATCTACCT
CAAGCGCACGCGCAGCCTCGGCGGGCATCCGCACCTTCCGACGGCGTACG
GTTCCCCCTTCAATCCCCTGCCGCCTTCTGATCCTTCCACCCGGAGCGGT
TACCGCGCGTTCCCCTAA
>Pgl_GLEAN_10005529 PgMYB161
ATGGCGGAGGTGGTGCAAGAGGGGTGCGTGGAGAATCGGCAGCCCCTGGC
GGCGTCGAGCTCCTCTGTTTCGGATGGCAGCAGCTGCGGCGGCGGAGGTC
CGGCTGGGACCTCGCCCCTGGTGTCAAGCTCGGGGAATTCCATCTCTGGT
CTGAGAATGAGCATGATTAAGGAAAATACTGCAGTAGCTTTTGACAGGAA
GTTAACTGTGAACGTGAATAGTTCTCATGGAGACCTTAGAATATGTATGG
TATCTGTATCTATTTATGCAGCTGAATTTTTCCATGATAGGACAGAGGTG
CAATGTTTGCATCGCTGGCAAAAGGTCCTTAATCCTGAGCTTATCAAAGG
CCCTTGGACTCAAGAGGAAGATGATAAAATCATTGACCTTGTGCGCAAGT
ATGGACCCACAAAATGGTCTATCATAGCAAAGTCATTGCCTGGTCGCATA
GGCAAGCAATGCCGAGAGAGGTGGCATAATCATCTGAATCCAGAAATAAG
AAAAGATGCTTGGACTCCTGAGGAAGAAAGGGCACTCATCAATGCTCATC
GAGTGTATGGGAATAAGTGGGCAGAAATAGCAAAAGTTCTTCCGGGAAGG
ACTGATAATTCTATAAAGAATCATTGGAACAGTTCTTTGAGAAAAAGGCT
AGATACCTATGGTGCCAACAGTTTTCTTGCAGCTCCAAACCTTCTTGCCC
ATGATGATTTAAAGGATCAAATGAGGCCTATTGCTATGGGCAACCATCTT
GATCTGAACAAAGTGCCCAGTATTGGTTCAAAAGATGTCCCTGGGAGAGC
TCACCGTTCCATTGTTGGTTCGCTTTCACAGGCATATAATCTGAAAGACT
CTGCATTCCTTTCACTTTCTATACCAACTGCGCAGACTTCATACGAAATG
ACACTAGTTGATGGCTCTGCTGTTACGTTAGCAGCACTAGGTCAAAGTGA
ATCTGTCCGAGGCAAGGGCCTAGAAATTGAGAAGGGTATTGAGGTCTGTT
CCACACCTGATCCTGTGGGGGAGGGCTGTGCCATTCAATTAAAATCTGCA
CCGGCAAAAAATGGTACCAAATCATGTTTGAAGAATGAGTTGTATTCCAC
CCTAGGTCCTCTTTGTTATCAGATTCCTAACATGGAAGAAGTGGCCACTA
TCAGTTCCTCGCTCCATTCTGAAAATCATGGTTTACATCAAACAACACAA
CATAGCAGGGATGGACTTAAGTCGCCTGATGGTTTTACGTCTCCATCTCC
AACGGTTGGCAAAGTATCAAGTCCACTAACTGTTGATTCGATTCTGAAGA
CTGCTGCTGACAGCTTCCCATGCACACCTTCAATATTAAGGAAAAGAAAA
CGTGATAAATCAACACCTACTCCAGACAATGAATTGAAGATGGGTGGAGT
AAACACTGATAGTTTTTACACTCCTAATGGGAAGGGAGCCAGTACAAATA
CTCCTGGGTCGTTTAAAACTGCACTTTTGTCATTGGGTCCTCTTGATGGG
TTTTTGACATCTGTAAGGAGCTCTGATGCTTCACCTCCGTATCAGATCAG
GTCAAAAAGAATGGCTGCTATGAAATCAGTTGAGAAACAGCTAGATTTTT
CAGCAGATGGATTGGATACTTCTGGATCTGAGATTCTGAACTCTCCTTGC
CATAATTCTGAAGGTGCAAATTCTAATAGGACGTAG
>Pgl_GLEAN_10037254 PgMYB162
ATGTACCGGGTGAAGAGCGAGAGCGACTGCGACATGATGCTGCAGGACCA
GATGGACTCGCCGGTGGCCGACGATGTGAGCAGCGGCGGGGGGTCGCCGC
ACAGGGGTAGCGGGCCGCCCCTGAAGAAAGGCCCGTGGACGTCGGCGGAG
GACTCCATCCTGGTGGACTACGTGAAGAAGCACGGCGAGGGGAACTGGAA
CGCGGTGCAGAAGAACACCGGGCTGTTCCGCTGCGGCAAGAGCTGCCGCC
TCCGGTGGGCGAACCACCTCAGGCCCAACCTCAAGAAGGGGGCCTTCACC
CCCGAGGAGGAGCGCCTCATCATCCAGCTCCACGCCAAGATGGGGAACAA
GTGGGCGAGGATGGCTGCCCATTTGCCAGGGCGTACTGACAATGAAATTA
AGAACTATTGGAACACTCGAATAAAGAGATGCCAACGAGCTGGTCTTCCT
ATCTATCCTGCTAGTGTATGCAATCAATCTTCAAGTGAAGATCAGCAAGT
CTCTGGTGAATTTAACTGCGGAGAGAATATATCCAATGATCTTCTGGGTG
GGAACAGTCTTTATCTACCGGATTTTACCAGTGACAATTTCATTGCTAAT
ACAGAGGCTTTATCCTATCCACCACACCTTTCAGCAGTTTCAATAGGCAA
TTTGCTCGGCCAGAGTTTTGCAGCAAAGAGTTGTAGCTTCATGGATCAGG
TAGACCAAGCAGGGATGCTGAAACAATCTGGCTGTGCGCTCCCTGCATTG
AGCGACACCATTGATGGCGTGCTTTCTTCGGTGGATCAATTTTCAAATGA
CTCTGAGAAGCTGAAGCAGGCTCTGGGTTTTGATTATCTCAATGAAGCCA
ATGCTAGCAGCAAGACTATTGCACCTTTTGGGGTTGCACTTTCTGGCAGC
CATGCCTTTTTAAATGGCAACTTCTCTGCTTCTAGGCCCATCAATGGTCC
TTTGAAGATGGAGCTCCCTTCACTCCAAGATACTGAATCCGATCCAAATA
GCTGGCTCAAGTACACTTTGGCTCCTGCAGTGCAGCCTACTGAGTTAGTT
GATCCTTACCTGCACTCTCCAATAGCAACCCCATCAGTGAAATCTGAGTG
TGCATCACCAAGAAACAGTGGTCTTCTGGAAGAGCTGCTTCATGAAGCTC
AGGGACGATCCGGGAAGAACCGACAACCATCTGTCAGAAGTTCAAGTTCC
TCTGCTAATACACCATGTGAGACTACTACGGTGGTTAGCCCAGAGTTTGA
TCTCTGCCCGGAATATTGGGAGGACCATCACAGTTCTTTCATCAATGAAT
GCACTCCTTTCAGTGGATATTCATTCACTGAATCCACTCCTGTTAGTGCC
GCATCACCTGGTATATTTCAGCTCTCCAAAATTTCTCCTGCACAAAGTCC
TTCAATGGGCTCTGGTGAGCAGGCAGTAGAGCCTATACATGAGTCAGCAG
GTTCACCTCATCCTGAAAATCTGAGGCCAGATGCATTATTCTCTGGTAAC
TCAGCTGATCCTTCCACTTTCAACGATGCCATCGCAATTCTACTGGGCAG
CGACATGACCGCCGAGTGCAAACCTGTCCTCGGTGGTGGCATCACATTTG
GTTCTTCCTCATGGAGCAACATGCCAAATGCATGTGAAATTTCGGAATTC
AAATGA
>Pgl_GLEAN_10037339 PgMYB163
ATGGGGCGGTCGCCGTGCTGTGACAAGACGAAGGTGAAGCGGGGGCCATG
GTCGCAGGAGGAGGACGCCGTCCTCCGCAGCTTCGTGGAGAGGTTCGGCA
ATGCCGGCAACTGGATCTCCCTGCCCCAGAAAGCAGGGCTGAAACGATGC
GGCAAGAGCTGCCGCCTGCGGTGGCTCAACTACCTCCGCCCGGAGCTCCG
GCACGGCGGCTTCACTGACGATGAAGATAACCTCATCCTCTCCCTCTACG
GCGACATCGGAAGCAAATGGTCCGTGATCGCGTCCAGGCTCCCCGGACGC
ACGGACAACGACGTCAAGAACTACTGGAACACCAAGCTCAAGAAGAGCCA
GTCGCAGCGCGACGAACCCCCGCCGCCGCCGACTCCACCACCCATCACCA
ATAAACTCCACGGTTCAGAGTACACAGGCGCGCGCGGCGGCGCCACCGTT
GACGACGACGCGCTCCTCCTCAAGTCGGAGCAGCTGTACGCCGAGCTCGT
GGGCCTCATCGACCAGCAGCAGCAGCCGTCCTCGTCGGGAACAACTAGTC
CGACGACGGCTAGCAGTTCAGGTAGCTGCGGCAGCACCAGCACCACCACC
GTGTGGCCCAGCATGGGCGTGCAAGACACAACACTGCTGTCCGAGTCCAG
CAGCAGCCTGTTCGACGCTTACTCCTTCCAAGACCTCCTGGCCGCGTCTT
ACGACCAGTTTACCGCGGTGACGCAGGAGTTACAGTACTACTGA
>Pgl_GLEAN_10024574 PgMYB164
ATGGGGCACCACTCCTGCTGCAACAAGCAGAAGGTCCGGAGGGGCCTGTG
GTCGCCGGAGGAAGACGAGAAGCTCGTCAAGTACATCACCACGCACGGCC
ACGGCTGCTGGAGCTCTGTCCCGAGACAAGCAGGGCTGCAGCGGTGTGGC
AAGAGCTGCAGGCTGAGGTGGATCAACTACCTGAGACCGGACCTCAAGAG
GGGGAGCTTCTCGCAGCAGGAGGAGGCCCTCATCGTCGACCTCCACAGGG
TTCTTGGCAACAGGTGGGCCCAGATCGCCAAGCACCTGCCTGGTCGAACT
GACAACGAGGTGAAGAACTTCTGGAACTCCACCATCAAGAAGAAGCTCAT
CTCCCAGGCTGTGGGCAGCCTTCACCCAGCTGCAGAACTGTACTACAACA
TTCTGGATGGAGCAGGACAGGGCATCGCGGCCGCCGGATGCGCGCCGCCG
CTGAGCGGGGCGGACAATGCGTCGGCCCAAGCAGCCACGGCGGGCGCGCA
GTCTCCTACTACCATGGTGCACAACCCCGTCGCGGCGTGGGCCGATTTCG
TCTCCCAACCGCTCTTCCTCCCTGTCAGCAACAACGTCCTCCACGGCAGC
GGGGACGACGGCCTCCACCAGTACGCCGTCGACGGGGAGTTCATCAAGCT
TTGCCGCGCGGCCGACGCGTTCCCGCCGCCGGAGAGCGCCGGCGCCGGCG
TCGCGACGAGCCATCAGTACTGCAAGCCAGCTGATCTCCTGGCTCAACAA
GAGGGCGCCGCCGCATCCACCGTCCGGAGCCTCCCAACGGTGTTCCTTGA
ACCGAAGGGCGGCGCGGGCACGTTCGCGGCCGATCCGGCCCTGGGCCCCG
TGATGGACTTCATGGAAGCCATCCTGGGGTCGTCGTCGACGTCGGCGCTC
AGCGCCTCGTCCGTCGACAGCTTCTCGGCGAACACCGGCATGCAGGCTCA
GTGCTGGATCCCCTGA
>Pgl_GLEAN_10012285 PgMYB165
ATGGGCGCGCCGAAGCAGAAGTGGACGCAGGAGGAGGAGGAGGCGCTCCG
CCGCGGCGTGCAAAAGCACGGAGCCGGCAAGTGGCGGACCATCCAGAAGG
ACCCGGAGTTCAGCCCGGTGCTATCGTCTCGCTCCAACATCGACCTCAAG
GACAAATGGAGGAACCTAAGTTTCAGTGCAAATGGACTGGGCTCAAGGGA
TAAAATGAGGGCTCAAAAATTAACTGGACCCTCATCTTCCCCAGCGTCTA
GCTCACACGCGTCTAACGCAGTGCCAAATAAAGTTGCTGAAGTTTCACAA
GATGCTGAAAAAAAGCCACAGGATGGAAAACCTCAACCAAAGTATGGTCC
CATGATCGTGGAAGCTCTTTCGGAATTGAATGAGCCAAATGGATCAGAGA
TTGGTGCAATCTATGGCATTATAGAGCAAAAACATGAAGTGCAACCAACC
TTTAGAAGAGTGCTTAGTTCAAAGTTGCGGCGACTTGCAGACGCTAAAAA
AATTGAAAAGGTTGATAATAAGTTGTATAGGCTTCCAGATTCCTCCGCAG
CAAGAAATCCAGCTCCAATAAAAGCTTCAGCTCCAAAGCAGAAGGATTTG
TCAAAGCCATCGAAGATGTCAAAGAACCTAGGACTGTTTGCTGCCGCCAG
CCCTGCACTGGAGGCAGCTATGGCGGCGGCAGCCAAAGTAGCTGATGCGG
AGGCGAAAGCACATGATGCACATGATCAGATGATGGAGGCAGAAAGGATC
ATCAAGATGGCTGAGGAGACGGAGTGTCTCCTCACAATTGCAGCTATAGC
CTATGATCGATGTTCAAGGGGAGAGATAACCACATTAAACCCGGCGCCAA
GGGAGAGACAACCACATTAA
>Pgl_GLEAN_10020860 PgMYB166
ATGGGACGCCACGCCGCGGCCGCCGCCGCCGCCGCCGGCGTGCAGCACAA
GCTGCGCAAGGGCCTCTGGTCGCCCGAGGAGGACGAGAAGCTCTACAACC
ACATCATCCGCTACGGCGTCGGCTGCTGGAGCTCCGTCCCCAAGCTCGCC
GGCCTCCAGAGGTGCGGCAAGAGCTGCCGCCTCCGCTGGATCAACTACCT
CCGCCCCGACCTCAAGCGGGGAAGCTTCTCGCAGCAGGAGGAGGACGCCA
TCGTCGGCCTCCACGAGATCCTCGGGAACAGGTGGTCACAGATCGCGTCG
CACTTGCCGGGCCGAACGGACAACGAGATCAAGAACTTCTGGAACAGCTG
CCTCAAGAAGAAGCTGCGCCAGCGCGGCATCGACCCCTCCACCCACAAGC
CCATCTCCGCCAGCGCGGCGGAGGCCGCGGCATTGGACCAGCAGTCGGCG
TCGCAAGAGCAGAAGCCCCCGGCAGACGCCGCCGACAGCGGCTTCGCCCT
GAAGCGGCATCACCAGCAGTTGTTCGACCCGTTCCCGCTGACCGACAGCT
TCGGCGGCGGCTTCGACGCGGCCGGCGCCGCATTGTACGGCCACCTGGTG
GGCGGCGGGAAGCAGCAGGACTCAGCGGGGTTCGTGGACTACAGCAGCGT
GCTGGACGTGTCGGAGAACCTGGGCTACGGCGAGAGCTCCAGCAACAGCA
GCAACTGGAACTGCGCGCCGGAGGCGAGCAATAATGCGCTCGACGGCGGC
GACGCCCCGTTGCACTGGACCTCCGAGAGCAAGGCCGTCGAGCCGCACTT
CGCCAGCTACGGCGGCGGCGAGGAGCAGTCGCTCGAGCACAAGTTCATGC
TGCCCTGCCACGGCCAGCAGGAGCAGAGCATGCCGCATTTCGACTTCGAC
ATCAGCCGGGGCGCGGTTGTCGGCGAGTTCAACCTCGAGTTCTTCTGA
>Pgl_GLEAN_10036366 PgMYB167
ATGACGCGGAAGCAGCCAGCGGCGCGGCGCGGGGGCGGCGTCGCGGGCGC
CGGCGTCAAGAAGGGCCCCTGGACGCCCGAGGAGGACAAGCTGCTGGTCG
ACTACATCAACGAGAACGGCCACGGCAGCTGGCGCACGATGCCGCGGCGC
GCGGGCCTGCTGCGCTGCGGCAAGAGCTGCCGCCTCCGCTGGATGAACTA
CCTCAGGCCGGACATCAAGCGCGGGCCCATCGCCGCCGACGAGGAGGACC
TCATCGTCCGCCTCCACCGCCTGCTCGGCAACCGGTGGTCGCTGATCGCC
GGGCGGCTACCGGGGCGCACGGACAACGAGATCAAGAACTACTGGAACTC
CCACCTCAGCAAGAAGCTCCCTCCGGTGGCGCCGCCGCCAGAGCAGCCAG
GCTCGTCGTCCGGCGCCGGCAGCTTTGGAGACGGCGCCATGACGGGCCTC
AACGCTGATGTCTTCGAAGGACTGGACGATCCGTTCTGCGCCCAGGACGG
CGCGGGTCGTGGCGGCTTCAACACGGGCTGCGCCATGGCCGACGACGGCA
CCTTCTCCACGTTCCTGGACTTGCTGGTCAGCGAGAACCAATTGGCCGAT
TACTTCGGCGATCACGAGAACGCTGATGGTGGTGGCAACGATCAGACTAG
AGCTTAG
>Pgl_GLEAN_10032520 PgMYB168
ATGGGTCGGGCGCCGTGCTGCGACAAGACGAGCGTGAAGAGGGGTCCGTG
GTCGCCGGAGGAGGACGAACTGCTGCGGAGCTACGTCCAGAACCAAGGCA
CCGGCGGGAACTGGATCGCGCTCCCCCACAAAGCAGGGCTGAACCGGTGC
GGCAAGAGCTGCCGGCTGCGGTGGCTCAACTACCTGCGCCCGGACATCAA
GCACGGCGGCTACACGGAGCAGGAGGACCGGATCATCTGCTCCCTCTACA
ACTCCATCGGGAGCAGGTGGTCCATCATCGCCTCCAAGCTGCCGGGCCGG
ACGGACAACGACGTCAAGAACTACTGGAACACCAAGCTCAAGAAGAAGGC
CCTCGCCATGAACCACCACCACCACCAGCAGCAGCAGGAGTACTACCACC
ACCAGCGCGGCTCGGGCGGCCGCGGGCGCGGCCGCCGCAAGGCGTTTTCG
CTCGCGGAGTTCTCCCCCGCGCCGCCGCCACAGCCTACCGGCGCCGCCAC
CATCATCAACAGCTGGGCCGGCGGCCTGGCCATCGACGACATGTTCCTTC
CCGAGCTCCTCGGGGTCGGCGACTTCCCGCCGGGCGACCTCTTGTTAGGT
GGTGGCGGGTTCCCGCCGCTGCTGCATCAGGACCGGGCGTCGTCCCTGCA
GGAGCTCGCGGCGTGCTACTTCCCAAACGCGCAGGCGGCGGAGATGTGGG
CGGCCGCGGATCACGTCAAGCCGTCGCCGGCCGGCCTGTGCCACAGCTTG
ACATGA
>Pgl_GLEAN_10023913 PgMYB169
ATGTCTGGGTCAAGAAGCTCTTCTTCCCGCAATGTTAACATGGCCTCCAC
GTGGAGCAAAAGAGAGGAAAAACTGTTTGAAGAGGCCCTTGCCTACTATG
GTGAGGGCACACCCGACCGCTGGCACAAGGTGTCCCGCGCCATGGGTGGC
AGCAAGACGGCCGACGAGGTGCGCCGCCAATATGAGATACTAGAAGATGA
CGTCAAACTCATTGAGTCTGGCAGGATTCCGTTCCCCAAGTACAACACAC
AGGGAGCTTGGAACTAA
>Pgl_GLEAN_10022186 PgMYB170
ATGGCGTGCGGCCGCGCCGGCGACCAGTCGGCCGTGCGAATGGGGCCCTG
GACGCTGGAGGAGGACCTCATCCTCGTCGGCTACATCTCCGAGCACGGGG
AAGGATCCTGGGACAACCTCGCGCGCGCTGCTGGTCTGAACCGGAACGGG
AAGAGCTGCAGGCTGCGGTGGCTCAACTACCTGCGGCCGGGGGTGCGGCG
CGGCAGCATCACGCAGGCGGAGGACGCGGTGATCCGGGAGCTCCACGTGG
CGCTGGGCAACAAGTGGTCCAAGATCTCCAAGCTCCTCCCCGGCCGGACC
GACAACGAGATCAAGAATTACGGGAGGACCAGGATCCAGAAGAAGCCGGC
CGCAGCAGCCAACAAGTCCTGGCATCAGCGCCTTGGTCCTTAG
>Pgl_GLEAN_10009281 PgMYB171
ATGTACTGGATTTGTATCATCTGCGGCTGCTTGACCGGGGACGAGGCGGA
GGTGGGTTGCGGTGGTGGTGGGTCGAGGGAGATGCAGATCCTGGGCGGAG
GCGAGATGCAGTGGCGACGGGGACGGGGAAAAGGGATCTGCTTGAGGGAA
GGTGAGGATAAAATTATTACCACTAACCTGAACAGCGACGGGGACGGAGA
GGACACCGCAGAAGACCACGGCGGCGCAAAATCCAACAGCAACGGCGACG
AGCAGGCGGGACGAAGCCATACAGGCAAAGCACGAAGGCTACTAGAAGAA
AAACTAAGGGAAACCTACTACTATACTACTAGGGACGCGAAGGCGTGGCC
CCCCTCCCGCCCGCTGCGGCAAGAAGCTAAAAGCACTGCACAGCATTTTG
TTAACTTCATGGAAGAAGAGGAAGATCTTGTTTTCAGAATGCACAGCCTT
GTGGGGAACAGGTGGGAGCTTATAGCAGGAAGAATTCCAGGAAGGACAGC
AGAAGAAGTAGAGATATTTTGGTCTAAAAAACACCAGGACAAATGA
>Pgl_GLEAN_10009833 PgMYB172
ATGGGGGCGCCGAAGCAGCGCTGGACGCCCGAGGAGGAGGCCGCGCTCAA
GGCCGGAGTCGCCAAGCACGGGCCCGGCAAGTGGCGAACCATCCTCAGGG
ACCCTGACTTCAGCACGCTCCTGCGCCTCCGCTCCAATGTTGACCTCAAG
GTGACGCTCGGATCGCCAGGGAGGGTGGGCGGTTTCGACAAGTGGCGCAA
CTTGAGTGTAGTTGCTGGAGGTTATGGGTCTAGGGAGAAGGCGAGAATGG
CGTTGAAGAAAGGCAGGCGTGTGCTGCCTAAGGTTGCTGCTGAGCCAATG
GATGTCGATGCGAATGGTTTGGGCAATGTTCATAATGCAGTCATCGATGC
AGAACCATTAGCAATGGCTGTGGAGCCCGTGGCAGTCGAGGAGAGTCAAG
AAAAATCAGTTGCTAGGCTTGATGACCTCATATTAGAAGCTATAATGAAG
CTTAAGGATCATTCTGGGTCCAATAAGGCAGCCATTGCTGCATATATTGA
GGAGCAATACTGGCCACCTGATAATTTTCCGCGGCTGCTGTCTGCCAAAT
TGAAGGCATTGGTTACTTCTGGAAAATTGATGAAGGTCTCTCCTCTCTCT
GATGCTTTAAGATTAAAGGTAAACCAAAAGTATAGAATTGCACCAAGTTC
ACCTTCCTTGGGTGGAATAAGCACCAAGGTGTCCTCTGCTGAAGAGATGA
ATGGAGAAAATGATACTAAGCAGCTAACTAAGCCTCAAGTGGATGCTGAG
CTGGAGAAGTTGAAAGGCGTGACTCAGGAAGAGGCAGCTGCCTTTGCTGC
CAAGGCAGTTGCTGAGGCAGAAGTAGCAATGGCACTAGCTGAGGATGCAG
CAAGGGCTGCGGAGATTGCAGAAAATGATGCTGAAACTGCAGTAGCTTTT
CTTGAAGCCCTCACTTTGTCTTTAAAAGACAGAAATGCCAATTCGACGGT
AGTGAATCCATCCTTTGTCAGGATATCTATGCGATGA
>Pgl_GLEAN_10035445 PgMYB173
ATGGGGCGCGAGGCGGCGACGAAGACGAGGCCCAAGCTGCGGAGGGGCCT
GTGGTCGCCGGAGGAGGACGAGAAGCTCTACAACCATATCATCCGGTACG
GCGTCGGCTGCTGGAGCTCAGTCCCAAAGCTCGCAGGCTTGGAGCGATGC
GGCAAGAGCTGCAGGCTGAGATGGATCAACTACCTGAGGCCTGACCTCAA
GAGGGGCAGCTTCTCCCAGCAGGAGGAGGACCTCATTATCAGCCTACACA
AGATGCTAGGCAACAGGTGGTCCCAGATCGCGTCGCAGCTGCCGGGCAGG
ACGGACAACGAGATCAAGAACTTCTGGAACTCGTGCATCAAGAAGAAGCT
CCGGCAGCGGGGCATCGACCCCGCAACCCACAAGGCGCTCGACGACGACG
CATCCAGAGCGGCCAACAACGCCGGCGAGGTGCCACGGGACGATTGCAGC
CAGCTCCGGGCCGCAACCGACGACCACTGTTTCGCCATGGGCGGCGCCAG
CAGCGACCCCCTCGCGTCGCAGTCCCCGACAGTCAGCTTCGATCCGCTGT
CCGTGACAAACGTACAGGCAATGCAGGGCTCCTACGCTGCCGTGCACTCC
TTCCAGTCGGCGGACCACCTCTGCGACTACGGAGGCGTGGACTTGGCCTC
CGACGCCGGCACGTACAGCGCCTACACGGGCGGCGGCGCCGACAGCTCCA
GCAACAGCAACGGCACTTGGACCTGCGGCGGCAATATCGTCGGCGGCGGC
GAGCCGATGCCGCAGCCTCACATGGATATGTTCGGCCGTGACGCCGACGG
GGCGTACCACCTGTTCGATCCGGCCAAGTACAGCCCATGGCAGCATCACG
AGGCGGCGAGGCTCCACGACGGCGGAGGGGGTGCGGGGAGCTTCCCGATC
CGGTCGATGTCGAGGGACCTGCCTGATTCCTGCTTCGACCTCGCCCGCAG
CTCGCTGGAGGACGAGTTCTGCGTCGACTTCCTCTGA
>Pgl_GLEAN_10022280 PgMYB174
ATGGGGAGAGCGCCGTGCTGCGACAAGGTGGGACTGAAGAAGGGGAGGTG
GACGAAGGAGGAGGACGAGATCCTGGGGAGGTACATCAAGGAGCACGGGG
AAGGGTCATGGAGATCGCTGCCCAAGAATGCTGGGCTGCTGCGGTGCGGG
AAGAGCTGCAGGCTGCGGTGGATCAACTACCTGAGGGCGGATCTCAAGAG
GGGGAACATCTCCGAGGAGGAGGAGGAGTTGATCATCAAGCTCCACGCTA
CCCTTGGCAACCGGTGGTCCCTGATCGCCGGCCACTTGCCCGGCCGGACG
GACAACGAGATCAAAAACCACTGGAACTCGCACCTGAGCAGGCGGGCGGC
CGACTTCCGCGACGGCGTCGTCGTCAACGTCGATCTCAGCAAGCTCCCCG
GCGGCGGCAAGCNNNNNNNNNNNNNNNNNNGGCGCGGCGGCCGGGCCAGC
CGCGGCATCATGGCCGCCGCCAAGGCCGGGAAGGAGAGGAAGGTAAAGGA
GAAAGGGAAGGACAAGGGGAAGAACAAGGCCGCAGAAGCGGAACAGAAGC
GCAAGCTGGAGGAGGACGACGTGGCCGTGTCGACACCGACCTCTCACTCC
CAGCCGTGCGCCACTGGCAAGAGCGGCGAGGAGCAAGCGCAGGCCAGCGC
CAGCGGCGTCACCTCTGTTGATGGGCCCGAAGAGGACCCGCTGGCCCTGA
GCGAGGAGATGATCAGTGCGCTCCTGGGCCCCGTAAGCCCAAAGGTGGAC
GTGGGCCCGGACTCGTACATGGACAGTGACAGTGGGCTAGGTGGGCCTAC
AGGGGACGTGGCCCAAGAGCTGGGCGAGGACGACAAGGCCATCATGGTGG
ACTGGGACTTGATGGGGCTGGACATCGCGACAGCCGGTGACATGTGGGAC
CCCCTGGTGTGGGACTACCCTGACATGGACATTGTGGTCCCGGATGGTGG
GCTCCAGCACCAGCAAGAGGATGTGGTGTCAGACCTGTTCTTCCTGGACA
ACCTGTAG
>Pgl_GLEAN_10030436 PgMYB175
ATGGACGCGCTGTGGATGTCTTCTTGCGGCGGTTTGCCGTCATCAGCAGC
GGCGGTCGTCGGTGAGGACGAGACGGCGGCGGGGGAGCTCCGGCGGGGGC
CGTGGACGGCGGATGAGGACGCACTCCTGGCGGGATACGTAGCGGCGCAG
GGGGAGGGCCGGTGGAATGAGCTGGCGCTCGCGGCGGGGCTGCGGCGGAC
GGGCAAGAGCTGCCGCATCCGGTGGCTCAACTACCTCCGCCCCGGCGTGC
GCCGCGGCGGCTTCACCCCGCGGGAGCAGCTGCTCATCCTTGACCTCCAC
TCCCGCTGGGGCAACCGCTGGTCCAAGATCGCCGCGCACCTCCCTGGCCG
CACCGACAACGAGGTCAAGAACTACTGGCGGACCCGGGTGCAGAAGCACG
CCAAGCAGCTGGGTTGCGACGTCGGCAGCGCCCGCTTCCACGACGCCATG
AGGAATTTGTGGATGCCGCGCCTCATCGAGAGGATCCACGCCGACGAGTC
AGCCGCCGCCGCCGCCGCCTCTGCTGACGTTTCGCACTGCTACTACTCCG
CACCTGCTTCCTCTTCTCAACCGGCGTGCCAAAACGCCGTTGCACCCATC
ATCAGCAACTGCGCGCGCGCACCGTCACCGGACGCCACGTCGTGCGTCAC
CGGCGGGTCGTCGTCGTCATGGGAGGCGTCCCCGGCGGCGCAGTTCCAGG
AGAGCAGTCCGGCCATGGCGGCTTGGTCCGCCCCCGACCAATGCCAAAAC
GGCTGCTCGAGCGCCACGAGTGGTGACAACATGTTCGAGGAGAGCTGGTC
GGAGCTTCTTGCTCGCGCCAACCACGACGACGCAGGCGTGCTGCCGGACT
TCGGATTGGGAGAAACCGGAGACAATTGGTGGAGCTTGGACGATATCTTG
CAGCAACCACTATACTGCTCGATATACTGA
>Pgl_GLEAN_10020214 PgMYB176
ATGACCACAGTGGCGACGACCACCGCGGCGGCGTGGACCATGGATGAGGA
CAAGGCGTTCGAGAACGCGGTCGCGGNGACGCCCGACAGCGCCGGCGGTG
CTGCGTCCGCGCTCAAGGACGGCGGCGGAGGACTAGGCGGGCACCGGCGC
GAGGAGCGCAAGAGCGGTGTCGACGTGGCGAAGAGCTGCTCCAAGGCGGA
GCAGGAGCGGCGCAAGGGCATCCCGTGGACGGAGGAAGAGCACAGGCTGT
TTTTGCTGGGTCTGGATAAGTTCGGCAAGGGCGACTGGCGGAGCATCTCG
CGCAACTTCGTCATCTCGCGGACGCCGACGCAGGTGGCGAGCCACGCGCA
GAAGTACTTCATCCGCCTCAACTCCATGAACCGCGACCGCCGCCGCTCCA
GCATCCACCACATCACCAGCGTCACCGCCGGCGAGCCAAAGCCATCATCC
ATCCTTCCCTGA
>Pgl_GLEAN_10010138 PgMYB177
ATGGGGAGGCACTCCTGCTGTTACAAGCAGAAGCTGAGGAAGGGGCTCTG
GTCTCCTGAGGAAGACGAGAAGCTCATGAACCACATAACCAAGCATGGGC
ATGGCTGCTGGAGTACTGTTCCAAAGCTTGCAGGACTTCAAAGGTGTGGC
AAGAGCTGCAGGCTCAGGTGGATAAATTACCTGAGGCCTGACCTTAAAAG
AGGTGCATTCTCTCAGGATGAGGAAGACCTTATCATTGAACTTCATGCTG
TCTTGGGCAACAGGTGGTCTCAGATTGCAACACGGTTGCCTGGAAGAACT
GACAACGAGATCAAGAATCTCTGGAATTCAAGCATCAAGAAGAAGCTCCG
GCAGAAAGGCATTGACCCCAACACCCACAAGCCCCTTGCCGAGGTTGATC
GCAAAGCAGCTCCAACAATCAGTGCTGAGAGAACCTCTGAGTCCAGTGAA
ATTGACCCTTCAAGTGGTGGTGCACTTGGCAACTTGAGCCATCTCCTCAG
TGAGACAGCACAATCACCAGAGCTGCTGCCAGTGCTCGGTAAGCGTCGCA
AAGAAACTACTAGTTTGGCACATCTAAGGGTGCCACCGAAGGAGCTATTC
CTTGACCAGCTTGTTTCTGGTAATGAAAACCTCCCCAGCTGCCGCTCAAC
AGGCCCAATTCCAAATTTCCCTTTCCAGCAGTTGATGTGTTACAGCAATG
AATTTGGCAGCAAGCATGGAGGCAGTACGAATTCACTCTGGTTTAACCAG
AATGAGTCAAGCTGCAGCACCATTTCCACTGTGATGCCACCAGTTTCACC
ATCAACTCTCTCAACGTCAACAGGACTCAATAGGTCACCAGACAATCCAC
ACTCTGGAGGTGCTGGCATGAGTAACCAATTCTACTGGGATACCACTAAT
CCTAGCAGCAGTAGCAGTAAAGGAAGCAGTGGAAGCAATAGCTTGGGATT
TGAGCTGCAAAGCACAAGCTCAATTCTGGAGAATAGTATTTTCCCATGGA
CAGATTTATCGCCAGATAAAAATAGCCACCTAGAGGAAGAACTCAAGTGG
CCTGACTTGCTCCATGGAACCTTCACAGATACACCAGCAACTATGCAGAA
TCTTGGCCAATCACTGTATGAAGATGTGGTCAAAGCCGAGAGCCAATTCA
ACATGGAGGGCCTCTGTGCAGCTTGGTCTCAAAATTTGCAGCCACAGCAA
CATGTGCAGGTAGTATCAGATTTGTATGACAAGGATTTGCAGAGAATGTC
CTTGTCTTTTGAGAATATTTAG
>Pgl_GLEAN_10014000 PgMYB178
ATGGCCAATGACATGGCATCTTTCTTCGGTTCTGCTCTGCCGCCGGCGTG
TCTGGCTTCGTTCGAGGAGGAGGAGGAGCAGGCTGAGGATGGCGGTGCTG
ATCACGGATACGGCGGCGGCGGGCAGGCCGGGAAGCTCTGCGCGAAGGGC
CACTGGCGGCCCGCCGAGGACGCCAAGCTCAAGGAGCTCATCGGGCAGCA
CGGGCCTCAGAACTGGAACCTCATCGCCGAGAACCTCGACGGCAGATCAG
GGAAGAGCTGCCGGCTGCGGTGGTTCAACCAGCTGGACCCGCGCATCAAC
CGGCGGGCCTTCTCGGAGGAGGAGGAGGAGCGCCTCCTGGTGGCGCACCG
CGCCTACGGCAACAAGTGGGCGCTCATCGCCCGCCTCTTCCAAGGGCGCA
CTGAGTCACTGACAACGCCGTCAAGAACCACCGGCACGTTCTCGCCGCGC
GCAGGCAGCGCGAGCAGTCCGCCGGCGCGCTCCGCAGCCGCAATAAGCCA
TCCTTGTCGCCGGCCCAGCTGCTGCACGTTGACGTCGTCGAACCAGCGGC
CGCCGTCCACTTACACCGCCCGCGCGCGCAGGGTCACAGCGGCGGTGAGC
CCGAGGAGTCCGCCGCGTCCTACACTGCCGACCTTTCCCCCGGGCCCCGG
CTCCGCCGGCGTCAACTTCTTCAGCCAGAGCAACGCCATAGTCCCTCACG
CCGCCGCCACCCCGGCGTCGGCCGCGTTCGCGAGCAGCGCGCGCTCCGCA
TTCTCCGCGCCGTCGCCGGCGCGACACCGGGAGGTCGCCTGCGACGAGGC
CGCCCTGCAATTCTTCGACTTCCTCGGAGTCGGCGCAACATGCTGA
>Pgl_GLEAN_10014001 PgMYB179
ATGGATCGTGATCATGAGATGTTCAGTTTCTCCGGCGGCCGTGTTCCGCC
GGCGGCGGCTCTGTCTCCGTTCCAGCTCCACCAGGAAAAGGAACAGGAGC
AGGCCGTCGTCGCGGAGGAGGTGTACCACGGCCACGTAGAGGATCCAGAG
GAGATTGCCTGCGGCCGTGGTGGGCATGGCAAGCTCTACGCGAGGGGCCA
CTGGCGGCCCGCCGAGGACGCCAAGCTCAAGGAGCTCGTCGCGCAGCACG
GGCCCCAGAACTGGAACCTCATCGCCGAGAACCTCGACGGCAGATCAGGG
AAGAGCTGCCGGCTGCGGTGGTTCAACCAGCTGGATCCGCGCATCAACCG
GCGGGCCTTCTCGGAGGAGGAGGAGGAGCGCCTCCTGGTGGCGCACCGCG
CCTACGGCAACAAGTGGGCGCTCATCGCCCGCCTCTTCCCCGGACGCACC
GACAACGCCGTCAAGAACCACTGGCACGTCCTCGCCGCGCGCAAGCAGCG
CGAGCAGTCCGGGTCGCTTCGCCGCCGCAAGCCCTCGTCGTGCTCCACCG
CACCCACTCACCTCGTCGCCGTTCACCACCACTATAACTCGCCTCCGCTG
CCATTTCACGCCGGCGGTGCGCACACCCGGCACGGCGTCCACACGGAGGC
GGTGGCCGCCACCCGCGCGCACAGCGGCGGGGAGTCCGAAGAGTCCGCGT
CCACCTGCACCACCGACCTCTCCCTCGGCTCCGTCGGCGCCGCCGTCGTC
CCCTGCTTCTACCAGAGTTCCTACGGAGGCTACGACATGGCCCCTTGCGC
CGCCGCGCTCGCGCCCAGCGCGCGATCGGCGCTCTCTGTTTACTCGCCAG
CGCGCCACCGGACGAAGGGCTCCGACAACGGCTGCAACAAGCTCGCCCGG
CCCTTCTTCGACTTCCTCGGCGTTGGTGCGACATGA
>Pgl_GLEAN_10014003 PgMYB180
ATGGCTCACGAGATGGCTGCCTTCTTTGGCGCCGCCCCGCCGGCTCTGGC
CCCGTTCCGCGACGAGCAGCGGCGGCATGTCGACGAGGTGTACCATGTCG
ACGACGTGGAGGACGGCGACGCCGGCCACAGGCACGGCGGCGGCGGCGGG
CAGGGGAAGCTCTGCGCCAGGGGCCACTGGCGCCCCGCCGAGGATGCCAA
GCTTAAGGAACTCGTCGCGCAGTTCGGGCCCCAGAACTGGAACCTCATCG
CCGAGAAGCTCGACGGCCGATCAGGGAAGAGCTGCCGGCTGCGGTGGTTC
AACCAGCTCGACCCGCGGATCAACCGCAGGGCCTTCTCGGAGGAGGAGGA
GGAGCGGCTCCTGGCGGCGCACCGCGCCTACGGCAACAAGTGGGCGCTCA
TCGCCCGCCTCTTCCCGGGCCGCACCGACAACGCCGTCAAGAACCACTGG
CACGTCCTCATGGCGCGCAAGCAGCGCGAGCAGTCCGGCGCGCTCCGCCG
CCGCAAGACCTCCTCCGGAGGCGAGTCCGACGAGTCGGCGTCCACCTGCA
CCACCGACCTCTCCCTCGGCTCCGCCGCCGCCGCCCCCTGCTTCTACCAA
AGCGCGTACAATCCCGGCTACGACGCGGCCCCGCGCATCGCCGCCGCGTT
CGCGCCGAGCGCGCGGTCCGCCTTCTCCGCGCCGTCGGCGGCGGCGCACC
ACCGGGAGGCGCGCTCCGACGACAAGGTCCCCGCGCCGCTGCCCTTCTTC
GACTTCCTCGGCGTGGGCGCGACATGA
>Pgl_GLEAN_10030557 PgMYB181
ATGGATGCAGTGGCGACCAGCAAGCACGAGGAGGAGATGATGGAGCTCCG
GCGAGGCCCCTGGACGCTCGAGGAGGACAACCTCCTCATGAACTACATTG
CTTGCCATGGCGAGGGCCGCTGGAACCTCCTCGCCCGCTGCTCCGGGTTG
AAGAGGACCGGCAAGAGCTGCCGGCTCCGGTGGCTCAACTACCTCAAGCC
TGACATCAAGCGCGGCAATCTCACGCCGGAGGAGCAGATCCTCATCCTTG
AGCTCCATTCCAAGTGGGGAAACAGGTGGTCGAGGATAGCGCAGCACTTG
CCGGGGCGGACGGACAACGAGATCAAGAACTACTGGCGGACGCGGGTGCA
GAAGCAGGCGCGGCAGCTCCGCGTCGACGCCAACAGCTCCGTCTTCCGCG
ACGCCGTCCGCTGCTACTGGATGCCGCGCCTGCTCGAGAAGATGGCCGCC
GCCACCNNGTTCGACGCCGCGGCGCTGGGGAGCCTCGGCCTCGACGCGCT
GGACCTGGGCCCGGCCGACTCCGACTTGTACTCGGACTCCACGCTGCTGG
ACTACCTCAACTCGACCTGCTGCGCCGGCGGCAGCGGCGCCATGATGGCG
ACGATGATTGGCAGCGGCGTGGTGGGCAACGCCGCCAACAACAGCTGCGG
CGGCGCCATGGGCGTAGACAACTGCGGCGACTACTACGGGTTGTCATCGT
CGTCGTCGTGGCGAGCGGACGAGCTCTGCCAAGCGGCGGCGAGGAAGCTC
GGCGATCACCAGTGGGGAGGAGGAATCTAG
>Pgl_GLEAN_10007566 PgMYB182
ATGATGCGCGAGATGTATATGGAGGTGCTGCCACCGATGGACCACATAGC
CGCGCGGAACGGTTGGTATCATCCGGCTGTGCGCACCTGGACGCCGCAGG
AGAACAAGCAGTTCGAGCGGGCGCTCGCCGGCGTCGACCTCCGCTGCCCG
GACTGGGAGCAGGTGGCGCGGGCCATCCCCGGCAGAACGGTCCGCGAGAT
CGTCCACCACTTCAAGAGCCTCGAGGTCGACGTCCAGCAGATCGAGAGCG
GCATGGTGCCCATCCCGCTTTACGGCGGCGGCGGCGGCGGCTCGTTCACC
CTGCAGTGGGACGGCAATGGCGGTGGTGGCCCTGGGGACTTTAGACACGC
GTACCGGTTCGGCGGAGGCTGCGGGAAGCGGCACCCCGGCCGGACGCCGG
AGCAGGAGAGGAAGAAGGGCGTGCCATGGACCGAGGAGGAGCACAAGTTG
TTTCTCTTAGGCCTGAAGAAGTATGGCAAAGGGGATTGGAGGAACATATC
CCGCAACTTCGTTCAGACGAGGACACCTACTCAAGTGGCCAGTCATGCGC
AGAAGTACTTCATCAGGCTCAACTCTGGAGGCAAGGATAAGAGGAGATCA
AGCATTCACGACATCACCACGGTTAACCTGACGGATGATCAGCCTCCCTC
GCCATCACAGTCGTCTCTGATCACCAACCAGTCCAACGCTTCAGCTCCGG
CCACAGCAGTAGGCCAATTCTCATTGTCATCAGAGACCAAGAAACATGGC
GCTGCAAATTTGCCGTTCAATTCACCAAGCAGGACTCCTGGAATGGCAAC
TTATGGGATGGGTTTGCAAGATCAAGACGGTTACTTGAGTGGTAGTGCTG
ACTTGCTGAGCACAGATCATGCATGCTATGAAGTGGACTTGCATCCAATC
ATGGATCTTGCTTTTGCTCGACATGGATGA
>Pgl_GLEAN_10004547 PgMYB183
ATGGAGAGGGGCAGCGATGACGAGGTGCTACAGGGGAAGAAGGCCAGGAA
GCCCTACACCGTCACCAAGCCACGGGAGCCATGGCGCGCCGAGGAGCACG
CCCGCTTCCTCGACGCCCTGCTCATGTTCGGCCGCGATTGGAAGAAGATC
GAGGAGCACGTCGGCACCAAGACCGCCGTGCAGATACGGAGCCACGCGCA
GAAATACTTCCTCAAGGTCCAGAAGCTCGGCCTGGCCGCCGGTCTGCCGC
CGGTGCACCCACGCCGCCGCGTCTTCATGGAGAACCAGAGCTCGGCGTCG
GTGGCGGCCGGGAGCGCCGCTGCCGCCGCCATGCCATTGCTGCAAGGCTC
AGTCGCGGCCGTGCCGCCAGAGATGCAGCACGGCTTGGAGTGCCCAGGAG
GGTCAGCTTCTGGGACTGCATCACGGCGGAGCGGTGTGCGTAGCCAGATC
GCACCGCCTGCAACACTTCGGGGTGGCAGCCACTTCACTACTGGGGCGCC
AAGCTTCAGCAGCGCGAGCATGGAATGGGCAGGCAGTGACAGCAGCACAA
GTGAAGAAGGATCAGCAACCGGTCCCGTGCTGGACGAACAACTCATCCAG
CTTCCATTGTCGCCAGATGATTTGCATTTCGCGCAAGTGTACAGGTTCGT
CGGCGACGTGTTCGATCCGAACTCGCGGATCCCAGTTGAAGCCCGTCTGC
AGAAGCTGAAAGACATGGATGATATCACCGTTAAGACGATCTTGCTGGTG
CTGAGGAATCTCGAGAACAACCTGTCAGCGCCTCAGTTTGAGCCCATCAG
AAGGTTGCTGTCGACGTATGATCCGAGAAGAGGGCTGTCTGGGTAA
>Pgl_GLEAN_10016246 PgMYB184
ATGGGGGCCCCAAAGCAGAGGTGGACTTCTGAGGAAGAGGCTGCTCTTAG
AACTGGAGTAGCAAAACATGGAGTTGGAAATTGGCGCACCATACTGAATG
ATCCAGAACTTAGTCCCATATTGTGCTACCGCTCAAATGTTGACCTAAAG
GATAAGTGGCGTAACATGAATGTAACTGTCACTGCATCGAGCTCTCGTGA
CAAGGTGAGGAGTGCCGTGAAGAAAACCCGAGCTGCCCCTAAGAATAATG
ATCAGCCTGCAGCAATCAGCACAGTTACTTCTGATGCTGATGACGAGATT
GTTGATGTAAAGCCTATAGCTTCAGTGTCTAGTGAAGCGTGGAATACTTC
ACATTCAAAGAAATCTCAGTCTCACTCAAGGCTAGATAATATTATAATGG
AGTCTATAAAGAACTTGAATGAGCCTACTGGGTCACACAGAACTACTATT
GCTAATTACATAGAGGAGCAATATTGGCCACCAAGTGACTTTGATCACTT
ATTATCTGCAAAGCTGAAGGACTTGACTGCCAGTGGAAAATTGCTAAAGG
TGAACCGGAAGTACAGGATAGCACCTAGTTCACCACGCTTAGAGGGCCGA
AGCCCCAAGATGCTGCTGCTGGAAGACGTGCAAAAGGAGCCCTTCAAAGT
AGGGATTGATGCTAGTAAAAGCATTACAAGATCTCAAGTTGATGCAGAAT
TGGCTCGCATGGCAAGTATGACCCCAGAGGCAGCAGCTGCTGCAGCTGCT
CGTGCAGTTGCAGAGGCAGAGATTATCATGGCAGAAGCTGAAGCAGCTGC
GAGAGAGGCAGAGATTGCTGAAGCAGAGGCCCAAGCTGCACAGGCCTTTG
CTGAAGCAGCGCTTTTGACATTGAAGAACAGAAATGCTGCGAAATTGATG
GCCCAGGGTTGA
>Pgl_GLEAN_10028933 PgMYB185
ATGGCGACGCCACCGGCGCCAGCACGGAGGCGACCAAGGAGAGGAAGGGG
CTGTGGGCTGAGGAGGAGCGGCAAGAGCTGCCGGCTGCGGTGGATGAACT
ACCTGCGCCCGGACCTGAAGAAGGAGCCCATCTCCAAGCGCGAGGAGGAG
ATCATCATCTCCCTCCAGCAGTCGCTGGGCAACCGGTGGTCGGCGATCGC
GGCGAGGATGCCGGGCAGGACGGACAACGAGATCAAGAACTACTGGAACT
CCCGCATCAGGAAGCGCCTCAGCGCCGCCGCCAAGTCCGGCGCCGGCGGC
AGCAGCAGCAGCAGCACCGAGCTGGCGCCAGCGGCGGTTCCGGCCGCCGA
GGAGAAGGTCGAACCGGAACCGATCAATGCGGCCACCGAATCGGCGCCTA
TGCCCATCCCCGCGCGGTTCCCGATGTTCGCCTGCCAGGCGCTCGACGGA
ACCGGCGCCGCCTGCACACCGTCGTCGACTACTAGCACGCAGCAGAGCAC
CGGCGACGAGAGCGAGGCGAGCGTCGGCGACAGCGACATGATCCATTTCC
TCTCGTTCGACGATCTGGATTACCCGGCTGATTTCCTTGTCGATGTGCCG
GGTGCCATGGACGCGTGGGAGAGCGAACTGTACCCTGCAAATTCGATGAG
CTCCTTTCTCTATCGATACTAG
>Pgl_GLEAN_10028934 PgMYB186
ATGGGGAGGGTGCACCCTTGCTGCTCCGAGGAGAAGAAGGTGAGGAAAGG
GCTGTGGTCGCCGGAGGAGGACGATAGGCTCGCCTCCCACATCGCCCGCT
TCGGCGTCAGCTGCTGGAGCTCCATCCCTGAGCTTGCAGGCTTGCAGAGG
TGCGGCAAGAGCTGCCGGCTTCGGTGGATGAACTACCTGCGGCCGGACCT
CAAGCGCGGCCGCTTCTCCCAGCACGAAGAGGACCTCATCATTGCTCTCC
ACAAAGCACTTGGAAACAGCTGGTCCCAGATCGCGGCGAGGCTGCCCGGG
AGGTCGGACAACGAGATCAAGAACTTCTGGAACGCGCGGCTACGCAAGAA
GCTCCGGCAGAAGGAGGCGTGCGCGTCGTCTTCCACGGCCGGGAGCAAAG
AGCCTGCCGCGAGCCACCGCCGCCGTCGCGACGCCGACGTGGACGCTGGG
ACACATCCGGCATCCGTTTTCAACCCACCGTTCCGGGCTCCTGAGGACCT
TCCCCGCCCTGCCAGTGCCGCCGGCTATGTCTCCAGCGCTGCTGCCGGCA
TCAGCAGTTACAACAACGACGAGTCGGCCGCCGGTATCACCGCGGCGACG
ACAGCCACAGGCGGCGGCGCTGTTCTTGCGGCCTCGGAGTCGGTAGCGCC
GTCGCCGACGAGCACCGCGAGCGCGTGCACGGATACTGCGCAAGCGGGCG
GCTGCGACGACGGGTTCCTGAAGGCGATGGTCGATGACGCGAGCTTCCTG
ATCGGGGATTTCTACCTCGACGGCGGCAACCATGATGGATCGATCGGCTT
CTGGGGAGGCCATGCGTTCAGTTGA
>Pgl_GLEAN_10024668 PgMYB187
ATGGAATCATGTACACCTTGGACTGAAGAAGAGCATAGAATGTTTCTTAT
GGGTCTGCAGAAGCTCGGTAAGGGAGACTGGCGTGGGATATCCCGAAACT
TTGTTGTTTCCAGGACTCCAACTCAAGTGGCAAGCCATGCTCAAAAGTAC
TTTATTAGACAGTCAAACTCATCAAGACGGAAGAGGCGATCGAGCTTGTT
TGACATGGTCCCAGAAATGCCAATGGATGAGTCCCCAGCTGCTGTCGAAC
AATTTACTCTCCAAAATACTCAAGATGAAGCTACAAGTTCAAATCAATTA
CCAACCTTACATCTTGGGAAACAGAAGGAACCTGAGGTTGCTCAGCTGCC
AACTTTTCAGCTAAGCCAGCATGAGGAATCTGAATACGCAGAACCTTCAT
TGCCATTACCAGACCTGGAGATGAACTCTGGTGTGCCATTCAAGACCATA
TCTGTTCCGGCGGTGCCAGCATTCTACCCAGCATTGATCCCTGTTCCACT
AACTCTTTGGCCCCCAAGTGTTGCTCACGTGGAGGAATCAGGCACAGCCC
ATGAAGTGCTAAAACCAACTCCTTTGAACAGTAAGGAGGCGGTTAAGGCG
GACGATGTTGTTGGTATGTCTAAGCTCAGCATTGGTGAGGCTAGCTCTGT
CTCCATGGAACCCACTGCTCTTTCCCTTCAGCTTATTGGATCGACGGATG
CAAGGCAGTCAGCTTTTCATGTCAGTCCACCAATGAATAGACCTGAACTG
AGCAAGAGAAACAGCAGCCCAATTCATGCACTTTGA
>Pgl_GLEAN_10024648 PgMYB188
ATGGGGAGGACGCCGTGCTGCGACAGGTCGGCCGTGAAGCGGGGCCCTTG
GTCGCCGGAGGAGGACGAGGCGCTGCGCACCTACGTCCAGCGCCACGGCA
GCGGCGGCAACTGGATCTCCATGCCCAAGAAAGCCGGGCTCAAGAGGTGC
GGCAAGAGCTGCAGGCTGCGCTGGCTCAACTACCTCCGCCCCGACATCCG
CCACGGCGGCTTCACCGACGAGGAGGACGCCGTCATCGTCTCCCTCTACA
CCCAGCTCGGCAGCAAGTGGTCGCTGATCGCGTCGCAGCTGGAGGGCAGG
ACGGACAACGACGTCAAGAACTACTGGAACACCAAGCTCAAGAAGCGCCT
CCTCGCCGCCGCCGCCGCCGACGCCGACGCCGGCTCAACCCGCTCCCCGN
NNNNNNNNNNNNNNNNNNNNNNNNNNNNNNNNNNNNNNNNNNNNNNNNNN
NNNNNNNNNNNNNNNNNNNNNNNNNNNNNNNNNNNNNNNNNNNNNNNNNN
NNNNNNNNNNNNNNNNNNNNNNNNNNNNNNNNNNNNNNNNNNNNNNNNGG
CGTCGACCTGGTCGGCGGACAACGGCGGCAGCGAGGGGTCGTTCCTCCTG
GACTTCTGCGCGGGCTCCGGCTCCGGCTCCGGCATCGGCGCCGCCGACGA
CCACCTCCAGCTCCCCGGCGGCTACTACTACCCTCTCGACCCGAGCTTGT
CGCTGGTATAG
>Pgl_GLEAN_10024645 PgMYB189
ATGGCTAGGAAGTGCTCTAGCTGTGGCAACAATGGCCACAACTCGAGGAC
ATGCGGTGGGCACGGCAGGGTCTTGATGGAGAACGGCGGCGGCGGCGGCG
GAGTGAGGCTGTTCGGGGTGCAGCTGCACGTGGGGTCTCCCTCCTCTCCC
ATGAAGAAGTGCTTCAGCATGGACTGCCTGTCGTCCGCGGCCCCGGCGGC
GTACTACGCGGCCGCCCTCGCCGCCAGCAGCTCCTCGCCGTCCGTGTCGT
CGTCGTCGTCGCTCGTCTCGGTGGAGGAGAACGCCGAGAAGGTCGCCACC
AACGGGTACCTCTCGGACGGGCTCATGGGCAGGGCGCAGGAGAGGAAGAA
GGGGGTTCCATGGACTGAGGATGAGCACCGAAGATTCCTGGCAGGCCTGG
AGAAGCTCGGGAAGGGCGACTGGCGAGGCATCTCCCGGCACTTCGTGACG
ACGCGGACTCCGACGCAGGTCGCCAGCCACGCCCAGAAGTACTTCCTCCG
GCAGGGCAGCCTCACGCACAAGAAGCGGCGTTCCAGCCTCTTCGACGTCC
CCGAGCGCGTGCTGCCGCCGAGCCTGTCGTCTCCCCTGCAGCTGCCACGG
TGCTCGTCGGCGATGAGCAGCGGGAGCGGGAGCACGTCGCCGTGCCTGGC
CGCGCCGAGACAGCAGAAGCACCCTGCTTCGTCCCTGACGCTGCCAAAGC
CTCATCAGGTGAGCCTCCACCAGCTTGCGCCGCCGGACCTGGAGCTGAAG
ATCTCGACGCCCACCGACCACCAGGCCGGCTCGTCGCCGAGGACACCGTT
CTTTGGTACCATCAGGGTCACGTAA
>Pgl_GLEAN_10036207 PgMYB190
ATGCAGCAGAATGGACACTATGAGCTACATCCTGTTGATCATCATCCATT
TGAAGCTATTGGGGACTATGTACCTATTGGTTCTATGGTACCACCTGCAA
CCTTTAACGACCTTGGACACCACCAGTATTTTTCTGAAAGAGATATCAAG
AAGCCCATCTTCAGCCATGCTTCATCGACCTGTCATAGAGTTGGATCTCA
ACTGCCTATGTCGTTGACTCCCAAAACTGAGGTTTCTCATCTCATAGAAA
GTGGCCTCAGATCATATAAGGCTTACGAGACGAGTGACAGGAAGCTGGTA
AAACTAGTGGAACAGTTTGGATTGAGGAAGTGGTCTTACATAGCACAAAT
GTTACCAGGAAGAGTCGGAAAGCAATGCAGAGAAAGATGGCACAACAATT
TGAGGCCCAATATCAAGGATCCTTTGTGCGGCACAAAACACACAGTAATG
CTAGCAGAAAAGCTCGACCTTTGCTGGAATGTGCGGCCTCCTTCAGCTGT
GCACCTCGGCGGCGGCCGTGCCTCTCCGGTTGCTGCAGATGTGCCTGCTC
AAGTAGACAATTACATGGACGAGATCTCCACCCGTGAGATCTCCACCCGT
GACCTGCAGGGCAATGTCAGAGCTCGGTTCAGGGCAGCGGAGGTCGATTC
AATACTGTTGATTGCTGAAGATCAATAA
>Pgl_GLEAN_10001965 PgMYB191
ATGGCGCCGCGTGATCAGCGGGAGGTGAGCAGCGACGAGGACTCCGCGCC
GGCGGGGGACCTCCGCCGCGGGCCGTGGACGGTGGAGGAGGACCTCCTGC
TCGTCAACTACATCGCCGCGCACGGCGAGGGCCGCTGGAACGCGCTGGCG
CGATGCGCAGGTCTCCGGCGCACCGGCAAGAGCTGCCGGCTCCGGTGGCT
CAACTACCTCCGGCCGGACCTCCGGCGCGGCAACATCACGGCGCAGGAGC
AGCTGCTCATCCTGGAGCTGCACTCGCGCTGGGGCAACCGCTGGTCCAAG
ATCGCGCAGCACCTCCCGGGGCGCACCGACAACGAGATCAAGAACTACTG
GCGCACGCGCGTGCAGAAGCACGCCAGGCAGCTCAACTGCGACGTCAACA
GCCAGCGGTTCAAGGACCTCATCAGGGCGGCGCCATCCGCCGCCTTCGGC
GAGAGCGCGCCCAGCGGCAACACGGACAGTAACAGCACTGCCGCCGTGTG
GGACACGCTGTACTGCCAACCACCACCACCACCAACGACGGCGGCCGCCG
AGACTGCTTGCAGCTGGTCCGACGAGTCGCTGCTCGGCGACATGGGGATG
GGGTTGCCGGAGCTCGGCGACGACACCATGTTGTGGGGCGCCGCCGGCGC
CGACGACCTGTGGTACACGCAGATAATGGGGTTGTGA
>Pgl_GLEAN_10000710 PgMYB192
ATGTACCAGCAGCAGCAGCTCCACAGCCATAACCAACACCTGCCCTCCTC
GGGGCCTGGCTTACCTCCGGAGAAGCAGTTTCTCCTGCAAGGAGGGGATG
CAGGTCTCATCCTCTCCACCGACGCTAAACCTCGGCTGAAGTGGACTCCC
GAGCTGCACGAACGATTTGTGGAGGCAGTGCATCAGCTGGGAGGACCAGA
CAAAGCAACGCCGAAAACGATCATGAGGCTCATGGGGATCCCTGGACTCA
CCCTGTACCATCTGAAGAGCCATCTCCAGGTGCAGAGACACCTGCAGCTC
CGGATCGAAGCGCAGGGCAAGTACCTGCAGTCGGTGCTGGAGAAGGCGCA
GGAGGCGCTCGCGAGTCAGAACGTCGACCTCGGCGCCGGCGTCCTCGGCG
CAGCCGCCGCCGCCGAGACGCAGCAGCTGTCGGAGCTCATCTCGAGGGCC
TCCGCGACCGATAAGTGCGGCCACCACCAGCACCCGGGCGGCGTCGGGGA
CGGGTCGGTGGACAGCTGCCTGACCGCGTGCGAAGGCTCGCAGAGGGACC
ATGACATGCTGTCCATCGGCCTGTCGTCGCCGCCGCCTGCTCCGACTCCG
AGAGGCGGCGGCGGCGGCTACCCGTTTGAGGCGGCGAGGTCGTCAGGCAA
CGAGAGGAGAGGAGGAGGAGGAGGAGCGAGCACGAGCTGCTGCGAGGAGT
TCCTGTTTCTCGAGGAGCACGGCACTGGCAGTGGCAGGGGAGGTCGTTCG
TCCTCATCAGATGAGCAGCAGCAAGAACTGGACCTCAACATCAAGGGCAG
CAACACTACTCGAAGGCCTCGCAACTGCGACGAGAAGATCGACCTGAATG
GATCGAGCTGGAACTGA
>Pgl_GLEAN_10015650 PgMYB193
ATGGCGAGGCGGGCGAGCGGCCCCAAGAAGAAGCTGAGGAGGGGGCTTTG
GTCGCCGGAGGAGGATGAGAAGCTGATGAACCACATTGCCAAGTATGGCC
ATGGCTGCTGGAGTTCCGTCCCCAAGCTAGCAGGCCTTGAGAGGTGTGGG
AAGAGCTGTAGGCTGAGGTGGATCAACTACCTGAGGCCGGACCTCAAGAG
GGGCGCGTTCTCGCAGGAAGAGGAGGACCTCATCATCCATCTCCACTCCA
TGCTGGGCAACAAGTGGTCTCAGATTGCAGCGCAGCTGCCTGGGCGGACG
GACAACGAGGTCAAGAACTTCTGGAACTCGTACATCAAGAAGAAGCTCCG
GCAGCGCGGCATCGACCCGGACACGCACAAGCCGCTGGCCGAGGCAAGCA
GCAGCCGCGGCGACGCCGAGCTCATCCTGTCGTCGCCCGCCGGACAGCAT
ATGCCACCGCCGCCGCCACCGGTGGCGGCGGAGAGCTACGTGTACAGCCG
CAGCATCAGCGCCGACGGTGGTGCGAGCGACGGCTCCCTGCAGTCTCTGT
CCGAGTACAACGGGGACTTCGCCGCGGGCTACCTACAGGACTCGGATCCG
CTGCAGCAAGGTGGCCCGCCGCCGTTGGTTCTCCCGTCGGTGTCGAGCTC
CAGCACGCTGAACTCGATGGCTGGCCTAAGCCCCGCGGCCGCCACGGCCA
CCGACGAACAGTGCAACAACAACTGTAGCAGCGGCGGCGGCGGCAACGGA
TCGTTCGAGCTGTCAACGCAGCAGAGCTGCAGCCCCAGCCAGCTGCCATG
GCTGGAGCTGGGCACGAGCAGCGGCGCCGCCGCGGCCTTGGACCAGTACG
GCGCGGCGCTGGACGAGCTCAAGTGGTCCGACTACGTGTTCGACGGCTAC
GGCGGCGGCGGGCAGTACCAGCAGGGACAGTGCATCTACGGCGACAGCAA
GGACGCCGCGCAGTTCGTCGACGCCAGCGGGCTCAGCAGCAGTTGGTGCT
TGAATTGA
>Pgl_GLEAN_10013323 PgMYB194
ATGGTGAGGCCGCCGTGCTGCGACAAGGAGGGCGTCAAGAAGGGCCCCTG
GACGCCGGAGGAGGACCTCGTCCTCGTCTCCTACATCCAGGAGCACGGCC
CCGGCAACTGGCGCGCCGTCCCGACCAGAACCGGGCTGATGCGGTGCAGC
AAGAGCTGCCGGCTGCGGTGGACGAACTACCTCCGCCCGGGCATCAAGCG
CGGCAACTTCACCGACCAGGAGGAGAAGCTCATCGTCCACCTCCAGGCAC
TCCTCGGCAACAGGTGGGCTGCCATCGCTTCGTACCTGCCGGAGCGGACG
GACAACGACATCAAGAACTACTGGAACACGCACCTCAAGCGCAAGCTGCA
GAGCGGCGGCGACGGCGCGGCCAAGCCGCCCGCGCACAGGCCGGCCTCGT
CGTCCAANNNNNNNNNNNNNNNNNNNNNNNNNNNNNNNNNNNNNNNNNNN
NNNNNNNNNNNNNNNNNNNNNNNNNNNNNNNNNNNNNNNNNNNNNNNNNN
NNNNNNNNNNNNNNNNNNNNNNNNNNNNNNNNNNNNNNNNNNNNNNNNNN
NNNNNNNNNNNNNNNNNNNNNNNNNNNNNNNNNNNNNNNNNNNNNNNNNN
NNNNNNNNNNNNNNNNNNNNNNNNNNNNNNNNNNNNNNNNNNNNNNNNNN
NNNNNNNNNNNNNNNNNNNNNNNNNNNNNNNNNNNNNNNNNNNNNNNNNN
NNNNNNNNNNNNNNNNNNNNNNNNNNNNNNCGTCGCGTCGACGGCGCCGG
CAACGGCCGGGGCCTTCTCCGAGTACGAGACGAAGCCGGCCGTCGCGGCC
CCGCAGATGCCGCTGTCGGCGATCGAGTCTTGGCTGTTCGACGACGACAG
CCACTTCCACCAAGTCCAGAGCGCCAGCTTGCTTGACGTGCCCACCATGG
ATTACCCGTTCTAGCTATAGCGCTATAGTGTGTTCGAGTGATGCCGCTCA
AGCTAATCACCTCAACCAGGGAGTGTGGTGTGGTCACAGCGTCGTCGCCT
AA
>Pgl_GLEAN_10013308 PgMYB195
ATGGCGACCGGGCCCGATCTGAGCTCCTCCTCCGGCGCCGCCGCCAAGAA
GGACCGCCACATCGTCAGTTGGAGCGCCGAGGAGGATAACGTCCTTCGTG
CTCAAATCACGCTTCATGGCACGGATAACTGGACAATTATAGCGGCGCAA
TTCAAGGACAAGACGGCCAGACAGTGTAGGAGAAGATGGTACAATTATTT
GAACTCGGAGTGCAAGAAAGGTGGGTGGTCCCGGGAAGAGGATATGCTAT
TGTGTGAGGCTCAAAAACTTCTTGGCAACAGGTGGACCGAAATTGCTAAA
GTTGTATCAGGAAGAACTGACAATGCAGTGAAGAATAGGTTTTCTACTTT
ATGCAAAAGGAGGGCCAAGGATGACGAGCCAGTTGAAGAAAATGGTACAC
CATGTTCCAACACAAATGCAAAGAGGGTTCTCACACAAACAGGTTCCGAT
TTGAAGGAGAACATTGTACCAAATATGCGATTATTTGGACAGGAAAAGGG
CGCACATGAAGATACCCGGCAACCTCTTGCTGCCTTATCTTCAAATAATC
AACAAAATGTAAATACAGTGAAATCCCACAATCTTGTTACCACAACCACA
AAACCATTACTTGGTCGAGAACAGCATTGTGTGAAGCAGGATGGTAACTT
CATGAACAAGGATGATCCAAAAGTTGCTATTCTATTGCAGCAAGCTGATT
TGCTTTGCTCCCTTGCAACAAAAATTAAAACTGATGATACATGCCAAAGC
ATGGATGAAGCATGGCAGCAACTGCAACATCATTTAGTGAAAAAAGACGA
CAATGGAATGTCAGAAAATAGTGAGTCTGGAATAGCTTCACTGTTAGAGG
AGCTTGATGATTTAATTGTAGACCCCTATGAGAGTAAGGAGGAAGATGAA
CAGAAGATGAGGGAGCAGAATGGACAAAGACAAGCTGATGTGGAGAATGA
GCACTGTACCGGTCCTTCACAAGCTAGCATGGAAGTAACATCAAATATGG
CCCCTGATGAAATGATGGAAGATCACACAGTACATAACTGCAAAGAAGTT
AGTAATCTTTGTAGAAACATGCTTTCTGGAAGTACGGAATCTTGCCTAGA
GGCTAAAACAGGTGCAAAACTACCAGCCTCTGAAAATTTAAGTGAGGTTG
CCGCAGATAACAGGCTTCAAAGAGTGGAATCTACATCTCCTGGTCTTACA
GATTTTGATGATTTTATCATAGACCCGTATGAGAATACAGAGGAAGATGA
ACAGGTCATTAGGGAACAGAATGGGCATATTGACGCGCACGATAACCAGT
CTTATGGTCATTCACAAGCTACAATGGAACTAACACCAGGCATGACCCCT
GATGAATTGATGGAAGCTTGCCCAGTAGATAGTTGCAAAGAAGATAACAG
TCTTTGCATAAATGTGCTTTCTGGAAGTATGGAACCTTGCCCAGGTGAAG
AGAAAGCAGCATCTGCAAATTTGAGCGAGGTTGCTGAAGAAAGCAGACTT
CAATGCATAGATTCTACCTCTCCTGTTCTAGCAAATTTTCATACTAAGGA
ATGTGGAGAAACACAAGCACCAGAGAAACCTAGCGAGGTTGTTGAAGATA
ACAGGCCCCAGTGTGTTGAATTTGCCTCCCCTGCTCACACAGTTCTCCGA
GCTAAAGCAGATTCAGAAACATTTGCATCCCCAAGAAGTGCTGTGGTTGC
GAAAGATAATAAGCTTCCATCTATGGAATTCACTTCCCCTGCCCACACAG
TTCTCCGAGCTAAAGCTGGTGCAGAAACATTTGCATCCCCAAGAAGTGCT
GTGGTTGCGAAAGATAGTAAGCTTCCATCTATGGAATTCACTTCCCCTGC
TCATACAGTTGCAACATTCCAACCGTACACCGACAATGCTGGTGACATGC
CAACTCCAAAATTCACTGCTAGTGAGAGGAATTTTCTGATGTCCGTGATA
GAGCTGACCTCACCAGGGTCAAGGCCAGAAACTTCTCAGCAGCCATCTTG
CAAAAGGGCTCTTCTCAATAGCCTTTGA
>Pgl_GLEAN_10016493 PgMYB196
ATGCACTACGATGCATTCGCCGGAGCGGCGGCGCCACCGCCGGCCCTAGA
TGCATCGCCGGAGCCGGAGCCGGAGCCGGAGCCAAAGTGGACGCGCAGGG
ACGACAAGTTCCTGGAGCTGCTGTGCTTCACCCGCAACACCGTTGACTTC
CACAAAGGCGCCAGCATCATCGGCAAGACGGAGGAGCAGATGAACCAGCG
GTGCGCCTTCCTGTTCGCCGAACTGAGCCACGTTCTCGAGTCGCTGGAAG
TGTCGACGCCGCCCGTGTGGGACATGGAGACTGCTGTTATGCCCGCGACG
CCGGCGGCGGAAGAAGTAGTGCCCGGGGCGGTGGTGCCTGCTGCTCCACC
AGTTGCGGCGGTGGAGAGCTCTGCCGCGCGGGCAGTTGGTGCCGGCGGCA
GTGCACGCAAGAGGAAGAAGAAGAAGGCTGAGAAGTGGACGGATTATGAG
CACAGACGTTTTTTAGCAGGTTTGCCCTTGTATAAAGGCAATTGGAATGC
GATGTCGAGGGAGTACCTGCCGAGCAGGACTGCGAGCCAGATCGCCAGCC
ATTACCAGAAGTATCAGAAAAGGGAGAAACAGAGGGAACAAGACAAGTGC
AAGAGAGCGAGCATACACGACATCACTGAACCTGGGATCGCCGCTGCCAT
TGCACCTGCAGTTTCATCAGGTGGTGAGCCAGCCGCACAAGGTGAACTTC
CGAGATCTGATGCTACCGCTCGGGGTGAAGAGAATGAATTATTGGAGCCA
ATTGGGAGTGGTGAAGATGGACTTAGTCCAGTTGAAGAGTTTCCTGAAGA
TGATCTCTGCTCACGTAGGTAG
>Pgl_GLEAN_10015781 PgMYB197
ATGGGGCGCGCGCCGTGCTGCGAGAAGAGCGGGCTGAAGAAGGGGCCGTG
GACGCCGGAGGAGGACGAGAAGCTCGTCGACTACATCAAGAAGAACGGCC
AGGGCAACTGGCGCACCCTCCCGAAGAATGCCGGGCTGGCGCGGTGCGGG
AAGAGCTGCCGGCTGCGGTGGACCAACTACCTGAGGCCGGACATCAAGCG
CGGCCGCTTCTCCTTCGAGGAGGAGGAGACCATCATCCAGCTCCACAGCA
TCCTCGGCAACAAGTGGTCAGCGATCGCGGCGCGGCTGCCCGGGCGGACG
GACAACGAGATCAAGAACTACTGGAACACGCACATCCGCAAGCGCCTGCT
CCGCATGGGAATCGACCCCATGGCGCAGGCGGCCGCCGCCATGGCGCTGC
CGCAGCAGCAGGCCGACCATCAGTTCATGTCGCATCAGCAGCAGCAGGCC
GCTGGAGCCGCGTGCCAAATGCCGGACCTGGTCCACGCGAACCCGACGAC
GGTGCAGCAGCAGCTGGCGGCCACCGCCGCGCAACAGCATCACCAGGACA
TGGCCGCGGCCGCCTGCAATAGCATGCAGGCGCCACTGACCGGCTACGTC
GACGGCCTGGACGACGTCCCGGCACTGATGCAGATGGTCCAGCAGCCCGA
CGCGTCGAACCTGCAGCAGTGGAGCAGCACGGTGACGAGCAGCAACAACA
ACAACAATAACGTCGGCTCCGGCGTGTCCACACCGTCGTCAAGCCCCGTG
GCGGCCGGGTTGAATCACCACTCCGCCGCCACGGCGTACGGCGGCGGGGC
GAGCGGCATCAGCAGCGACGACGCTGCCGCGCTGTTCGGCATGCATCAGC
TGTCGGAGCTCCTCGATGTGAGCGACTACATGTAA
>Pgl_GLEAN_10013916 PgMYB198
ATGGGACACCACTGCTGCAGCAAGCAGAAGGTGAAGCGCGGGCTCTGGTC
GCCGGAGGAGGACGAGAAGCTTGTCAAGTACATCACCGCCCACGGCCACA
GCTGCTGGAGCGCCGTCCCCAAGCACGCCGGGCTGCAGCGGTGCGGCAAG
AGCTGCCGGCTCCGGTGGATCAACTACCTCCGGCCGGACCTCAAGCGCGG
CACCTTCACCGACCAGGAGGAGCGCACCATCATCGACGTCCACCGCATCC
TCGGCAACCGGTGGGCCCAGATCGCCAAGCACCTGCCCGGGCGCACGGAC
AACGAGGTCAAGAACTTTTGGAACTCGTGCATCAAGAAGAAGCTCATCGC
GCAGGGCCTCGACCCCAAGACCCACAACCTCCTGCCGGCATCCAGGTCAC
TCCTCCACGGCAACGGGGCGGCAAACCCTAGCAATAATCCTGCCCAGTTC
CACTCCAATGGCGCCACCGCCAACGGCGGCGCGACCACGCCGTTCACCAT
CAGCTCCCCGACCAAGGCCGCCGCCTACGACGCCGTCACGGCCCCTCCGC
CGCCGGAGATATCGGCGCCGGCAATGTACGACGTCGTCCCCAATCCGGCC
GGCATGCTCATGGGGCATGACCACGCGGCGATTCCGGCGGGATACCCGTA
CCTGGACAACGGCGGCGGCGTGCTGATGAGCTTCAGGGATCAGAATGCAG
GTCTTCAGACCTCCATGGACTTCATGAACGGTTCCTCGTCGTCCTCATCC
ATGGATCACGCCGCCGGCATGCCCAACGGCAACGGCTTTAGCCAAGGCAT
GGGCGCCGCCTTCATGGACGTGACAGCGGGAATGTGGACCACCGCCGTCG
ATTCGAGCATGTGTGCAGGGATAGAGGTGGTCCAGCAGCAGCAGCCGCCG
CCGCCGCCGCTGCAACCACAAGGGCTCATCCAGGGGGAGGTGATCGGCCG
GCCGGCGGTGATGAACGGTGGCGGTGCAGCTGCTGATAAGGGCCTGGAGC
TGGACATGATGGACGTATCCTCGGTGTACGGCGGCGCCGGGGCAACGGCG
GCGTTCGATCTGGAGCTGATGGAGTCGTGCGGGTTGTTTTGCGGTGGCGT
GGGAGGCGCCGGCAACGCCATGGAGCAGCTGCAATGGGACTGCTAA
>Pgl_GLEAN_10001403 PgMYB199
ATGGGGAGATCGCCGTGCTGCGAGAAGGCACACACCAACAAGGGCGCGTG
GACCAAGGAAGAGGACGACCGGCTCGTCGCGTACATCAAGGCGCATGGCG
AGGGGTGCTGGCGCTCGCTGCCCAAGGCCGCCGGGCTGCTCCGCTGCGGC
AAGAGCTGCCGCCTCCGGTGGATCAACTACCTCCGGCCCGACCTCAAGCG
CGGCAACTTCACGGAGGAGGAGGACGAGCTCATCATCAAGCTGCACAGCC
TCCTCGGCAACAAATGGTCCCTGATCGCCGGGAGGCTGCCGGGAAGGACG
GACAACGAGATCAAGAACTACTGGAACACGCACATCCGGAGGAAGCTGCT
GAGCCGGGGGATCGACCCGGTGACACACCGGCCGATCAACGAGCACGCGT
CCAACATAACCATATCGTTCGAGGCGGCGACGGCGGCGGCCGCCGCTGCA
CGTGAGGATAAGGGCGCCGTTTTCCGGCTGGAGGAGCCCAAGGCGGCGGG
CGCGGCGGCGATCGGGCGCGACCAGATCATCAACCCCGCCGGCGACTGGG
GCCAGGGCAAGCCGCTCAAGTGCCCCGACCTGAACCTGGACCTCTGCATC
AGCCCACCGCCGTGCCCGGAGGAGCAGCCCCTGATCATGAAGCCGGTGAA
GCGGGAGGCCGGGCTCTGCTTCAGCTGCAGCCTGGGTCTCCCCAAGAGCG
CCGACTGCAAGTGCAGCAACTTCCTGGGGCTCCGGACCGCCATGCTCGAC
TTCAGAAGCCTCGAAATGAAATGA
>Pgl_GLEAN_10019811 PgMYB200
ATGGGACGGCAGCCGTGCTGCGACAAGCTGGGGGTGAAGCGGGGTCCGTG
GACGGCGGAGGAGGACCGGAAGCTCATCAACTTCATCCTGAGCAACGGCC
ATTGCTGCTGGCGCGCGGTGCCCAAGCTGGCCGGCCTGCTGCGCTGCGGC
AAGAGCTGCCGCCTGCGCTGGACCAACTACCTCCGCCCCGACCTCAAGCG
CGGCCTCCTCACCGACGCCGAGGAGCAGGTCGTCATCGACCTCCACGCCA
AGCTCGGCAACAGATGGTCGAAGATTGCTGCCAAGCTACCGGGCAGGACT
GACAACGAGATCAAGAACCACTGGAACACCCACATCAAGAAGAAGCTGAT
CAAGATGGGCATCGACCCGGTCACGCACGAGCCCCTCCATCAGAGTACCA
GCAGCCCGGCCACACCCTCGCAGTCCGTCGTCTCGGCCGATTCAACCAGC
AAGTCCGACAAGGCGACCAAGGAGCAGAGCCCGGCGAGCGACGTCGTCGT
CGTCGTCAGGGGCGTGTTGGTGGCGCCGGCCGACAGTTCCAGCCCCACGG
AATCGAGCACGAACACTGCCAGCACCGGCGGCGGGAGCAGTAGCAGCAGC
AGCGGCAGCCACGATCAGGATCCGCTGGTGAAGTGGCTACTGGAAGAGGA
TCCGCCCACCGGCGACGAGCCGTGGCTCGACTTCACCGGGAGCGTGGATG
TGGACGAGTTCAGCAGCATCGCCGCCGGCCCGGAGTTGCCGTGGGACGGC
GCCACCGACTGGCTGCTCGACTACCAAGATTTTGGATTGGGGGGCTCGAG
CTTGGTCGTCGATGGCTACATGATCAACGGCTCAAACGGAGCAAAGTTCT
AG
>Pgl_GLEAN_10010237 PgMYB201
ATGTACTTGCCCAAAGCAGAAGCTAGTTTTGGCTCAGCTCATACCAACTC
AGTTGCAAACCAGCAGCAAATGGAATCAGCTGGAAACAACATAGGTCCTA
GTAATGGAGCAAATAACAATAACAACCTAGCTGCAAGGCAACGCCTAAGG
TGGACAAATGAACTTCATGAAAGATTTGTTGAAGCTGTTACCCAACTTGG
TGGTCCTGATAGAGCAACCCCAAAAGGAGTTTTGAGAATTATGGGTGTAG
CAGGATTAACAATATATCATGTGAAAAGTCACTTGCAGAAATATAGGCTA
GCAAAGTACATTCCTGACGCTTCAACTGATGGCAACAAGGCTGATAACAA
GGACCCAGGGGATTTACTTGCAGGACTTGAGGGATCTTCTGGGTTGCCGA
TATCTGAAGCCCTCAAGCTGCAGATGGAGGTCCAGAAACGTCTGCATGAA
CAGTTGGAAGTACAAAGGCAGCTGCAGTTGCGAATCGAGGCTCAGGGAAA
ATACCTCCAGAAGATCATTGAAGAGCAACAGCGCTTAACTGGTGTGAAAT
CTGAAACTCCTGCAGCAGGTGCTTCTGTCACGGTATCAAGTGATCAATTC
CCTGACTCAGAGCGAACTGAGCCCTCGACTCCTGCACCAACATCTGAGTC
TCCAACTCAAGTTGGTGCTTCCAATAGAGACACAGGAGAACAAACTGAAG
CAACCAAGCGCACCTGCAACAGTGATTCTCTCTCCCGTCACGAGCCACTG
ACCCCTGATTCCAACTGCCAGAATGGCTCTCCTCCCGCTAGTCCAAACCA
TGAGAGGGCATCAAAGAGGCAACGGGGCAGTGGTAATGAATTCTTAGATG
CGGAGACTGATTTTTCGCTTCCAGGCCACATCTTTGAGTCAAGCTCGGGC
CCAGAGTTCGAGCAGTATTCAATGTCCTACTCAGGTCATTAG
>Pgl_GLEAN_10029681 PgMYB202
ATGGATCCCAAATTCAATGGTGAGTGGAGTGCCTATGAGTTTGAGAGGGT
GAAATCACTCATTGCTAGTCACAACCTGGACAACAACTACGGTGATGGCA
CGAATAACAAACACAATGACATTGCGAATGACATCCAAGCTTTGTTCCCT
TGGAAAGAGAGACATCAGAGTGGAAAGCATTCTGTGGTGGCAATCAACAT
CTTGGTGAATGACAACACTGGCATTCTAGTGGAGGATCCAAGTATAGACA
ACATAGATTTGTGGTTTGTCCATATGATGACAGATAAGATACCAGAGGCC
ATGCAGATGGTGGATGAGGTGTCTAAGAGTAAAACAATCCATCCTCAGCA
ACACAGGCAGAATAAGGGGAGTTTTTGGACCTATGAAGACCACAGGCAGT
TCCGTTATGGCCTGTGCAAATATGGCCGCGGCAAATGGAAGGATATCTCA
AGGGAATTCGTCACCACCAGGACGCAGGTGCAGGTCTCCAGCCATGCGCA
GAAGTACTTCTGTAGGCATAACACCTCCGAGAAGCAATGCTACAGTATTA
ATGATGTTGGCCTCTATGATTCTAAACCTTGGGCGCAGAATGATGTTGGC
CTCCATGATTCTAAACCTTGGGCGCAGAATAACTCTTCCAGCTAG
>Pgl_GLEAN_10029677 PgMYB203
ATGGATCGCAAGTTCAATGGTGAGTGGAGTGCCTCTGAGATTGAGATGGT
GAAATCACTTATTCATAGTCATAATCCCAACAACAACTATTCTGATGCCA
CAAACAAAAACCACAATGACATTGTGAATCACATCCAAGTTCGTTTTCCT
TGGAAGGAGAGGCATCAGGTAATTGGACTTTATATTGATCTTGTGGCAGA
TACGATGAGTCAATCACAGAGTGGAAACCACTCTGTTGTGGAAACCAAAA
ACATAGTGAATGGAAACTCTAAGATTCCAATGGGGGATCCAAGCATAGAC
AACATGGCCTTGTCATTTGCCCATGTGACAGATAAGGCACCAAAGGCAAT
GCGGAATAAGGGGAGTTTTTGGACCAAGGAGGAACACAGGCAGTTCCTTT
GTGGTCTGTGTGCATACGGCCGTGGTAAATGGAAGGACATCTCAAGGGAT
TTCGTCACCACCAAGACACCGGTGCAGATCTCCAGCCATGCACAGAAGTA
CTTCCGTAGGCAGAACAGCTCCAAGAAGCAACGCTACAGTATTAATGATG
TTGGCCTATATGATGTTGAACCTTCCATGCAGAGCAACACTTCCAGCTGG
AAGGCGCCTGCCTTTGCTGGTGGTGCATATAACCCAATCTACTATGGGCC
CGGCAGCCAGGTTGCCACCATGAACAACCTTGCACAGGTTTGGCCACCCT
TAATTTACAGTGCTGATCAAGCAAGCAGTAGCCAGGCAACTACTTGGACT
GGCCAGCGAATGGGGCCTAGTTCTTCTGCAGCTTTAACACCTGAGGGGGC
TGGAAGGAAGATGGTCTGGACTAGCGATCTGAAAGGAGATATTCTCCCTA
AGCAGTGGATGAAAACAGACAATGTGTAG
>Pgl_GLEAN_10019884 PgMYB204
ATGGATTTCTACTCGGACGACTCGGACCCGGACATCGACGAGGACCTGCA
GGAGGACCTCGACGCGCTGCGCCGCTCCTGCATCCTGTCCGGGGCCGACC
CGGACGCCGCGGTCGCGCAGGGCTCCTCGTCGCCGCGCCCGATCTGCACG
TGGCCGCCGTCCGACACGGACGAGGACGAGGACGACCTCGAGACGCTCCG
CGCCATCCAGCGCCGCTTCTCGCACTACCAGTCCAGTACCTCCACTTCGT
CACCGACGACCATGAAACCTGAGGCATCACAGGGAGTGCACAGTGAATTT
TTTGCGGACAGGAATGAAGACGAGTCTGCTGCACAGAAGCAGAATGCAAA
CACTCATAATCGGGCTGGGTTTCCAAAAGCCGCGCTATTGTTAGTGGATG
CTCTCAAGAAGAACAGAGCATGCCAGAAGTTGATTAGAAGGAAATTGATA
AACATTGAAGCGAAAATTGAAGAAAATAAGGATCTTAGGGATCGCGTAAA
ATGCCTTTTGGGTTATCAATTAAGCTGCAGAAGATCAACTGGCAGATCTT
TATCCCAGAAGGAGGATCCTCGTATCAGACTGATTTCCTCTAGGAAACCA
ACGCAGATCTCTGAAAAGGTATTGCCATACATATGCATTGGATGTTGCAT
GATACGTTTTCCTGTATTAGTTAAAACATTATTCTCCAAAATCTACGCAT
GTCTTTTAGATTTAGATTTACTGGAAATGTACAATAAACCTACTTATGGA
AGAGAATTCTATTCGGTGCAGAATAATAACAGAAAGACGCCTGCACTATT
TCTTGGCCCAGCTGATAATCCCCATGTTTTAAAGTATAAAATGGTGCTGG
AGCAACTCCCAATGTCATTTAAGAAGCAGACATGGTCAGATGCGGAGAAA
GATAAACTTGCCAGAGGAATAAAGCAGCAATATCAAGAAACATTGATTTT
AGACTCGCTGAATAACGGAAGTGCCATTGGTGACTTCAGTGCTGTTGATA
TGGCATATGCACTGACAAATGGTGCTGGTAATTTTGAGGTGACTCCGGAG
AGTCTTAGATCAGTCCTACCATTAATAAACTGGGATAAAATTTCTGCTAT
GTACCTGCCTGGTCGATCTGGTGCTGAATGCGAATCAAGGTGGCTAAACT
GTGATGATCCATTGATTAATCGTGAGGCCTGGACTGCTCAGGAGGAAACA
AAACTTATACTTATTATTCAAGAAAAGGGACTGTACAACTGGATTAACAT
TGCAGCTACTTTGGGTACTTACCGGACTCCTTTCCAATGTCTTGTTCGTT
ATCAACGAAGTCTTAATCCTCACATAATTAACAAGGCCTGGACAAAAGAG
GAAGACATTCGACTTCAAGCTGCTGTTCATACCTTTGGTGAGAAGTGGCA
ACTTGTATCGGCGAGCCTGGATGGTCGCACCGGCAGTCAGTGCTCGAATA
GGTGGAGGAAAACCTTGCACCCTACAAGGACCAGAGTAGGAAGATGGCAT
TCGGATGAGGACAAACGCCTCATGGTTTGTGTCAAGCTAATTGGATCTGG
CAACTGGAGTAAGATTGCTCCATTTATTCCTGGCCGCACACAAACGCAAT
GCCACGAGAGGTGGAATAATATTCTCGATCCAAATATAGATCTTGGGAAA
TGGCGTCCTGAAGAAAATTCCAAGTTATTGGCTGCTGTATCTGAGTTTGG
GCCTTGCTGGTCTAAGATCGCTATGAATATAATTCCTGGCCGTAATGATA
GTATGTGCTATAGACAATGGAAGAAACTTTGTAAACATCATCTGCCTGCA
GTTAAAGCAGCCATTCAACTAAAGAAATCTGTTTTTCAAACCAATTTTGT
TGATAGAGAAAAAGAGCGGCCTGCAATTGCCCCCAGGGACCTAATATCAC
TTGTGCAATCGAAAGGTGACGAAACTGATGAGAACAAAAGAGATAGATCT
AGAAAGCAAACCAAAGAAAACCTAGCCGCGTCCAATGTTGTCAACAGTTC
AGCTGCTCCTGATTGTGGTGCCGCTAATACTATTTCAAACACCAATTCAA
GAAGACCAAGCAGAAAATCAACAGGAAGATCAAAAAAGCAAAATGAAGAT
AATGTTGCTGTGCCTGATGGTCTCAACAATTTATCTAGCAGCTCAAATAG
ATCCAGGAAGAGGAAATCTACTACTGGCAGCAATGCAGCTGTACAAAAGA
GAACAAGGGGATCTGTCCCTGTGGGTAATGAGGCTGTTCCAATTGAATCG
AGGGCTACTGTTAGTGCTGATAATGAGGTAGAAACAAATATAATAATGGA
TCCTCTGTCTGTTTGTGAAGAGGGAGTAGTCAAAAAAAGAACCAGGGGTT
CAAAACCAGCTGGCAATAATGCAGCTTCACATAAGAGAATAAGGGGTTCC
ATCCCTGAAGGTAATAAGGTTGTTCCAATTGAAGACAGTGCTAATGATGA
GGTAGGAACAAATGGAATGATGGACGACCCTGCGTCTGTCAGTGAAGAGG
GGGTAGTCAAAAAGAGAACGATGCGTTCAAAACTTGCTGGCGGTGAGGGG
GCTGCCAGAAAGAGGAAGTGCACTATCAGTGCTGATAATGAGGCAGGAAT
GAATACGAGGGATCCGGTCTCTGGTGAAGAGGAAGTAGTAAAAAAGAGAA
AGAGGTGCTCAAAACCTGTTAGTAATGAGGGGGCTGCCAGGAAAAAGCTG
AGGGCCCCTGTCTCTGTTGGTGATGAAGGTGTGGTTGAAAAAAGGACGGG
ATCTGTTGCCACTGAAAACTATGGCAATGCCACGAAAAGGAAGAGAGCGC
CATCAAGGAGGAAATCAGCCGAAGATAATTTGACAACAGAGCGTCCGGCG
AATGCTACCCCTGAGTTGGACCTTCCTATTGTGCCTTCTGAAGAAAGAGT
TGTTGATGCTGGAAATATGGATAAAGGGAGAAGAAAGTCAACCCCAAGTG
ACATATTTCCTTGCATCCGTGGCCTGCAGAAAGCAATGCTTGAAAGGGTC
TTCACCAGTGGAGATTTTGCATCTGGAGAATATTCATTACAGGTAGAATG
TCCAAAGGTAGAAAAACGTCATCTAGCAGTGTTCAGGCTCAAAGTGAGGA
AAAATGTTCTTATCGTGCTCTCTGTTCAGGGTGGTGCTGAACAAGCTGGA
GTATCATTAGGCACATTGCCTTTACGCAGCAGATTTCTTTCAGCAAGGAA
TCTTGTTCAAACAGAACCAGTGCCCCTGGATGTGATCAGTTGA
>Pgl_GLEAN_10021694 PgMYB205
ATGGAGAGATTAAGAACCAACCAGCTCTATAGTTCTGGAGTTCCTGTAAC
TGTGCCAACATCACTGCCTTGTATACCAGTCTCTCTGGAAGAGAGCTTCC
CGAAGCTTCCGGATTCCCAGAATGTTTTGATAGAGAGAGAACTAAGGAGC
ACCCCACTTCCACCTCATCAAAATGCTGTTGCTCCAATCCGTGGCCAGTT
TCACTCCAGTACTGGATCTGTTGGGCCTTTGTGTTCGCCCCCAGCTGTAA
GGTTCTCTTCGGTTTCAAACCCTGAGCTCTCCAATCCCAACCCTTATAAT
TCTCAAGTACCAAGTACTGCAAGTTCTTCGACGCTGAATTATGGATCACA
ATATGGAGGCTTTGAACCATCCTTGACCGATTTTCCTAGAGATGTTGGAC
CAACCTGGTGCCCTGATCCGGTTGATAGCATTCTTGGATACTCTGGTGAT
GTCCCTGGTGGGAATAACTTGACTGTGAGCACTTCTCTTGAAGTTTCAGA
GGATCTTACTAAGCAAACTGAATGGTGGACTGAACTTATGAATGATGATT
GGAAGGACATTGCTGATAACCCAGCTTCTGCCGAAACTCAACAGGTTGGA
CCACCTGCGCAGTCATCCATCTCAGTTCACCAATCAGCTTCCCAACAAAT
AGTTTTGTCTCAACCTGGAGAACCTATGGCAGTTGTGGCACCCTCACCCA
CTGCTGGCTCCAGTACTGCCAAGGCGCGCATGAGATGGACTCCTGAACTT
CATGAGCGCTTTGTAGATGCTGTCAATCAACTTGGTGGCAGTGAAAAAGC
AACTCCTAAAGGTGTGTTGAAGCTGATGAAGGCGGACAATTTAACCATTT
ATCATGTAAAAAGCCACCTTCAGAAGTACAGAACAGCTCGATACAGACCA
GAATTATCTGAAGGCTCCACAGAAAAGAAGGTGGCATCAAAAGAAGATAT
ACCATCTATTGACCTGAAAGGGAGTTTTGATCTCACTGAAGCACTTCGTC
TCCAGTTAGAACTTCAAAAGCGGCTTCATGAACAGCTTGAGATTCAAAGA
AGTTTGCAGCTAAGAATTGAGGAACAGGGGAAGTGCCTTCAGATGATGCT
TGAGCAACAGTGCATACCAGGGACAGAAAAGGCGACTGATGCTTCAACCT
CAGCAGAAGGATCTAAGTTATCTTCTGAGATTCTGGAATCTTCTACTGCA
AAGGAAGTTCCAGAAACCAGTCCAAATGGAATAACCAAGCAAACAGAATC
AAGTGACACCCAATGA
>Pgl_GLEAN_10016742 PgMYB206
ATGGGGAGGCAGCCGTGCTGCGACAAGGTGGGGCTGAAGAAGGGGCCATG
GACGGCGGAGGAGGACCAGAAGCTCGTCAGCTTCCTCGTCAACAACAGCC
AGTGCTGCTGGCGCGCCGTGCCCAAGCTCGCAGGATTGCTGCGGTGCGGG
AAGAGCTGCCGGCTCCGGTGGACCAACTACCTGCGGCCGGACCTGAAGCG
CGGGCTGCTGTCGCCGGAGGAGGAGAAGACGGTGATTGACCTGCACGCGG
AGCTCGGAAACCGGTGGTCCAAGATCGCGTCGCAGCTGCCGGGGAGGACG
GACAACGAGATCAAGAATCACTGGAACACCCACATCAAGAAGAAGCTCAG
GAAAATGGGCATCGACCCCGCCACCCACAAGCCCATCCAGCCCGCTCCTC
CACAGCAAGAGGAAGATAAGACCGCTGCTGGGCTCGGTAAAGAGGCGTTC
TCCATTAGTGAGGTGCCCATGGTGCACCTCCTTGACGACGTCGTCCTGCC
ATGTGATGACCTCGTCGCCGGTACACCGCCGGCCAGTAACAGCGGCATCG
ACACGGCTTATTCGCAGGACTCTCCCTCCTCCTCCTCCTCCTACTCCGGC
TCTGCAGCAGCGTCGAGCTCCAGCAGCAGCGTTGTACAAGGACAGTGTCA
GGATTGGTTGGAATGGGCAGAGTCAATGTTGCTGGATGACGTCGTCACGA
CGCCGGCGCCGTGGGCGTTCGGCGACCCCTTCGTCACGTACCAGAGGATC
GTGCTGTTCGATCACCAGGAGACATGGTGA
>Pgl_GLEAN_10016741 PgMYB207
ATGGGGAGGCAACCGTGCTGCGACAAGGTTGGGCTGAAGAAGGGCCCGTG
GACGGCGGAGGAGGACCAGAAGCTCGTTAGCTTCCTCCTCAACAATGGCC
AGTGCTGCTGGCGCGCCGTGCCCAAGCTCGCCGGATTGCTGCGTTGCGGA
AAGAGCTGCCGGCTCCGGTGGACCAACTACCTGAGGCCGGACCTGAAGCG
CGGGATGCTGTCGGAGGAGGAGGAGAAGACGGTGATCGACTTACACGCGG
AGCTAGGAAACCGGTGGTCCAAGATCGCGTCGCACCTGCCGGGGAGGACG
GACAACGAGATCAAGAACCACTGGAACACCCACATCAAGAAGAAGCTCAA
GAAGATGGGCATCGACCCTGCCACCCACAAGCCCCTCCAGCCCGCTCCTG
ATCTTCGTCAGGACCCAACCGGCGGCTCACCGGCGGAGGAGGAGAAGATG
ATCGTCACGGCAGGGCACGAGGCGCAACTCCTCCTCAACGACGACATCGT
GTTCCCAGCTGATGGCGAAGAGCTCGGGGCCCAGCCCGCGCCCAGTGACG
GCATCGCCACCTGCACGGCTTATTCACCAGAGCAGTCTTCGTCCATCTCA
TCCTCGTCTTCCTGCTCGGCCTCGGTGGCGGCAGCATCAAGCGGTGGCAG
CGACAGCGTCAACGGCGAGTGGCCTGATTGGCCGCCGGTGCTGATGGACT
GGCCGGCGGAGTCGATGTGGCAGCTGGAGGACGTGGTCACGGGGCGAACG
CCATGGGAGTTCGAGGACCCCTTCGTGACGTACCAGAGGATCGCGTTGTT
CGATCACCAGGAAACTTGGAACAACAGCAAGGTCGAGCTCTTCTGA
>Pgl_GLEAN_10016737 PgMYB208
ATGGGGAGGCAACCTTGCTGCGACAAGTTGGGGCTCAAGAAGGGCCCATG
GACGGCGGAGGAGGACCAGAAGCTCGTCAGCTTCCTCCTCAACAACGGCC
AGTGCTGCTGGCGCGCCGTGCCCAAGCTCGCAGGATTGCTGCGGTGCGGG
AAGAGCTGCCGGCTGCGGTGGACCAACTACCTGCGGCCGGACCTGAAGCG
CGGGCTCCTGTCGCCGGAGGAGGAGAAGACGGTAATCGACCTGCACGCGG
AGCTGGGCAACCGGTGGTCCAAGATCGCGTCGCAGCTGCCGGGGAGGACG
GATAACGAGATCAAGAACCACTGGAACACCCACATCAAGAAGAAGCTCCG
GAAGATGGGCATCGACCCCGCCACCCACAAGCCCCTCCAGCAGCAGCTCG
CTGCGGACGCCGGCGGCTCGCCGGAGGAGGAGGCGAAGGCCGTCGCGGCG
GGGATCGCACCGCCGCCAGGTGCTGGGCACGAGGCGTTCTGCGTCGACGA
GGTGCGCATGGCGCGCCTCCTGGACGACATAGTCATCCCAGACGGCGACG
TCATCGTCGACGCGCCGCCCGCGGCCAACGGCAGCGGCATCAGCACAGCT
TATTCGCCTGAATCTTCCTCTTCTTCCTCCTCGTCGTCGAGCGGGGGGAG
CAGTATCGTCGACGGCGAATGGCCGGAGTGGCCGCAGATGGTGGAGTGGC
CGGAGTCCACCATGTGGCTTGACGACGTGGTCACGGTCCCGACGCCGTGG
GAGTTCGAGGACGCCTTCCTCACGGACCAGAGGATCGCTCTGTTTGAGCA
CCAGGAGACATGGAACACCGTCAGCAGGGTCGAGCTCTTCTGA
