# Supplementary material for: Genome-Wide Identification and Transcriptional Analysis of the MYB Gene Family in Pearl Millet (Pennisetum glaucum)
Source: Int J Mol Sci. 2023 Jan 27;24(3):2484. doi: 10.3390/ijms24032484 (PMC9916650; doi:10.3390/ijms24032484)
Supplement: Supplementary file 1 [file ijms-24-02484-s001.zip › File S3. Promoter sequences of 208 PgMYB genes.txt]

>Pgl_GLEAN_10011796 PgMYB19
cacgacgtcgcgcgcggcgcgctct
ggctctggccgtgctgctggtgcatgctttgactcgatttttctcaaaatttttaaacag
aactggaccaagtgatgaataccaaagttgtagatctaagtaccagctacaactttcaca
aaggctgtatggggtttttctctctagatttgaatctgtgggagtgccaactttgaatgt
cagcctgtgcttgccaacagtaaaccctggcttgcaagggctttttcacaattttcccct
ccaaatctgcaatgccactctacatgaaagttgtgtccctcaacaagacctacaactttc
ccaaaggtagaattttaattgtttaggtgaattttggagaacgcggcgaaaattccggca
gacacctgtggacactggatgacaaggggtttgacccaccttttgaccatgggttggccc
cacaagtgttttaactattcactagggtcactaggggtgtgttaaggggttttcatgggt
gagggcccaggttgacctagggttgaccatttgaccggctaatcatgtcattagcgttaa
tgacggtaattaaaaacctggggcgtcacacttgcgccctcggacccgaccaccagcccc
aaggccatcgtcgcctcaagctcgtcaccggccagctcgtccgcctctacagctccgcca
ccggagcatgggtgcggctcgatgtcggcgtcgagcactacaacgagccgttctacatgg
tgttccggtcccagatctgcgtttgcgaggtcgtcgccggagacgctcccgcggtcgtcc
cgctcgagcgcaccgacggcggcgcagacgatagcgacgtcttggaccacgagaagctcc
tccctccctgcgagactggtggggcggcggcttggggaggcggcgacaaagttttttttg
agatatgaggtggtgacagagctcctgcagggaggaagaaggggatttcccctctcccgc
tgacctgtggggcccactaacggcccgctgacggcatccagctgcatctgacagaaatgg
cataaagcacatgaaaaattgcaacctttggcatagagctcaaatttatatttttcatag
tatagagcacatgagatacattttgttgtgccatacagggaattttctcacgcattttct
gtcctggagcgcggcgcgaggtcggtttcgggaaactcggcgatcgagctgccttgagtt
aggcgcgccaactgcatgcatcgggcattcgggctcaatgaatggctcgtgcacgccaaa
tcaccgggccagctccactatataagcgtcgcgcggcgacgtacggttaggcggctgcgg
cgaggcgacggatcggagcc
>Pgl_GLEAN_10005876 PgMYB23
taggatttttatgtgacttcatgtggaggctttcatgagttttctctccttttagagcgt
ttacctaggattcctatgtggcttcatgtgagatttcaaaaggagaccccaattagcaat
agtaagaagtaagataagattggttggagattctttgtcgtggcaatttttttatttatt
ttgaggactgtctaaactagactacaaagctctctccgccacttggaaaataaggggaaa
aaataaatcttagcgatttgggaaaacactaagaaaatgttggttatgtttgatgctaaa
gttagtcccgtaaacacggttttgcatagcttgcggggggtgaagattggttgaatgaaa
ggtacggtggcaacatcgccgggaatccttacatttttgcatgacagagaagagagagaa
cagtaatgtggcaatagtgcaccaacagaaagattagcgcttccaggaaacaactcagaa
agcgtaaaattattccaaaatggggggaaagagagatagatccttgaattagtgtagact
agaagtcaatctctctgcgaaagcaagattaaaatggtcccatgtatatatctgcttcat
tcggcttttgaattcgtagggaatacacatggagattccacttttgaattcgcggaatat
ggaacaggttccggtgccgttcaaagatgccacaggaccggccggcttcttcttaacaac
aatccggatctgttcgtccttacccatcacttgtctttcggcaattgaacccactggtta
atgatgctcgctaagacagttagcatgaatcagcacctgcatctgtaatcatcacgtcga
tcacgtctcgaaaaagtaattgatttcagaccagaccagcgaaaaccgatccaaagaaga
agaaaatggaaagccgcgcggggaatccgaagaaaaagccttgaaggaaacagaacaaat
tcacgtgatattttgcttcaaccattggatttcgtaggatgaatgactcattaaaaaaca
agcactctagaatttctcattttataatagttaaaattaataataggattccatccagcg
agatgagaagtactttgcatcacgtgaacgaaagtactagaagtttagtgagaccagtaa
ccaattttattttattttattttctaagttctcgttaaatcggccgatgcaaaaaccaaa
gcagaacacgcactttcaagtacttctgctactttacacaaataccatttcatttttcag
cccgtccatcaatggttacacagtttgtggtacaaaatggtgtttgcaccgaattacgtc
gtatgttcttgaagctacagtacccatcgccagtttgaggttgcgcggcagccgaacagc
gagtggtcgagtggatgctgtggactgtcgccggccgtcgccgtggcagcggcgcgtcaa
cggtcagagctctcgctcgctcgcagcctgtttcttctccctgatccggtcggataacaa
ttgtttagtcgggcgagacgcgcacgcgccctcctccactttcggctttttactaccgct
gccgtgcttctagccttctatctactactgctcgctaataatcctccatctccatccctc
ctaattgcggccttaaccacaccagcagcaagcaagcatgattaatccttctctaggagt
aattaattagtccccaggccaaccccacatgcggcctccgccctcctcgcgccgtcgtcg
tcgtcgtctccgatcgatcacctatatataccaccccctcgcgcggcctcgccctctcgc
tccctgtctccgatcctcacctcaagtctccatactacaaaccacacgcgcacctgctct
ctactctactcactcatcgcccaggccactactccaatcgtctccctcaaccttgttgtt
gttagccaactaactagccgtagccgccaccagcagccgtttcgccgtcttgatcgagca
tggacatggacatgggcgcc
>Pgl_GLEAN_10025141 PgMYB2
atttgttacatacatgcatatagaaccttcttgcaagcctagctttttgctcgatcaatc
aatgtgatgtccactctgcagcaagtcctcattggggcagcagctatagctgatggcaac
aggtccctgatctgccacacttccacctccacaaaaaaaaaaaaatggaagatcagctcc
acttttggtcatggcacctgcatttgctcggatgacgcgcgcaccctcacattcttcaca
tgggggtggccggccttgcggcaaatgggcaaaggcatgcgttgccatcgatcacatata
ttgttgcaaggtgtgtgtgtgttgggtagtagtgatgagtgactgggatgttttgcgcac
gcatggaatggaaccggttggatggggcacacaccaatgggctaataaggggggatggat
catggacggatgctcatcggaacgaagaaaggtcgctggagacgtcgaatctggaactcg
atcggctccttgtcgaaactagctagtggaattatattaacgctagtttcccatattttt
gggcctgcgtcaatctataccgtaggaagatgaatccagcggtttgcagaagtactcgtt
tcacccttgttgttgtcaaacctttttccaacacctcgaattcccggtcaagcttttttc
cagatcgacgggaaactgtctgtttgctagctagaatggtttggagatgccctaaaaaaa
aaacagaggatgcgccatttcgtcgccggtaccaatctagctccagctgaagcgaacttg
atccaaactactatatctcgctccggaagttcttcccatgaacatggaaaataaaattaa
actgcaaaaataaagagcagattgaagcaatccaccaatcctctctctatatataaaaaa
aagaatagaaaaggaagaattttgagaaggaaattagaggagggatttggacgtggtcct
ttcgctgctcacatgggtatgttgatagttcccagccctaatacaatctcttccccccct
gtacaggctgatgtgctatgaatttcgttccaaaatggcttgtacatgattcacgtgccc
ccgttgtcatgcaactaaatccttctggaattaaaccaacacggtacatgaggccatgag
ggtgtgctaggcgtgtcgcgcggaacatccgtgcttgcattgcgcgcggttgcggctagc
tcctccttcaactgtgcaaaaggggacgtgtgccaaaaaaaaaaggggggggggctagat
gatccacttattgatggctatatccgccgtgttttcgcattcgtttccatgtgcatcgga
aacgagctctttcaaaattccatttgatgtgtgtgcgtgcgcaatttttagtttaaacta
atttcataaaaacaggatgaaaatttttttccttcattatttttgcgaatgtttttcttc
attacgttgcgatcgccccgcgtggcgatctacgtacaaacggaagattctaaagccgaa
ttacccgagttttaattgggaccatgttattgtagacagaagggatcgcaaataaaattt
gcacactgctgcagaatcatgacctactactaatagaattcacccaagtgcacaaaaagt
aatgagttgctaaaatttgtctaactttttgagcaaccaaaatgcacagctttattggct
ttgttggccatgcagtgttgccgcagaagatcctggtgatgatgggcggctttgttgtgt
tgtgaccccagtctctgatgacaagtcagcagcagtcttctcctcctccgtcttcctcct
ctgctcatcttcttcccccccatgccgagctcccctcgtctcgcctgcgcacgcaaaccc
tatataaaaggcatcctagtcccactccgaatctccccccaactctcctcgtcgctcctc
tgtctctctctctctcgatctccctctccggccgttcttctccactgctcgatcggaccg
atcgaggtcttctcccgata
>Pgl_GLEAN_10009918 PgMYB32
caaaaaaaaaaatacatgcacaacttttattcaatcttaggaactgcgaaacagtggcag
gatttacctatggcaaagttgttggtactaattatagatataaacatcaaatatgcataa
atatagtagagatcatcataaagtacaattgtataaaaatttcaaacattgacaagtgaa
tagttggatgaatatactatagaagcactaagtatagctagatagatgttcgatgaagat
tcattctaaacaaaaagtcgaaggtgacatgacaacaatatctagtgtcaggcaacaacg
agaaaggttggacgcgatatcctttcgtattgcagccatgatgtaattaggttaattgga
ctttatttgtctggtttattaatgctaagtataatatgtgtatttttaataagattttta
agtttcttattagatcacataatgtatggaaacaaacagattaccacccacctaaaacat
atttttttttcgtagtggtacggtgaaagaaaagatgagaagatgcatggttaagagtga
cacaccctcacgctgcacaaagagcgggcacatcaagacatgaagccctaggcaatatga
ctatcagtaacgaagctagcagtagacttatcaatttcaaggattcgtcgactcattctc
ttgtagcctttcatagaggtacgcaggatctgtgtgtatgtgttcgtacttcgtagcagt
gagtattagtacgtatatgtgagcttggtgcattggcatgtagcttattagaagggttgc
tgacaaataaaatagaagaataagaagaagaagaagaagaaattaaaaaaaaaagaggat
agtagaagaactgaaggagcgttgcagcccaagtgtttgaaaaacagtggcaggaacacg
tgtgtttatgaatagcattaaagcgagaggaggttgcccacatcagtggcaggaacacgt
gacgtggaagctcaaactaccacaagcacaactagatgctacacactgcaggaccgtact
cccagtaacaggcatgcagagtactacttaatcctagtgctgtggaaataatttgattga
tagatcagttgttttctatttcttttttaattgaagagggtgtggccggagtgtaggcac
actgcatgtgggcctagtcaaaagttgcctttatgagcatggacccatctgtatatatgc
acttggaaaaaatcttatacggtgaaaagaaaaaaaaatgggcttaatctcgttgtgcag
ctgagagtacaactttgttctatggatagagaaacagcacgttcgtttggctgatggctg
gtggttgatgctgatttgttttgagagaaaagtaccgatggctggttgttggtggccggt
ttgttctgagagaaaagtactgctagctggtggctgataagccaaacgaacaaggcgaaa
atcattattattatactaggtaaaaaattattcagagtttgttctttttacaaaaaaaaa
cggcattctgttgaaacctcaagctatcatccaacttgtgaatccaggaaatctttgcca
attatttctacatacacggcagaacaaaatgcccaagtggagtacatgcaaaagtctagc
tttaaattccccacacagtagcaaacagttcctctaggtaataaatccttgctttattaa
attggattggatggaaggaagtgggcctgggccgggtcaacttctctgattcatgtgatg
tagtccttgacagaaagggaaagcatagatgcacacacaagacacagctaagcttagcag
agtgaaaagagatcatcagcaggtagttgctggctagcgagcacacacaggttagttagt
taggtgatagcaagagtgaaaaggagctcactcacattcatttcctgtcctatatataac
cggccggcgcacgcttcataaccttcgtcatgggacaacagtaggctgtaggccggccgg
agaggaggaagacacgagat
>Pgl_GLEAN_10021618 PgMYB26
ttcctttacttgtcttcgtttattcgccatcgtttataacatttctatagaacctacttg
ttcaagcaacaatttaaaaggacaagaagatttcttgtgtgtgagaaaggcctggagtac
tgaatttgtagacttgatagtgggtataccctttttgtggataaaaatccggtggatacc
actagtagcaatgtttaatagtgggccacttccgcaaatagcatgcatgacctcatactg
cacatctctcataaaaaatgaaaaaaaaagtgactcctgctcaatctgaaatccctttta
tttgtttttacaagatcttcagaagagtcgcgtgttagtatatatgatccttaatgctga
ttagttctagtgttacatcttgcaaaactcaatctacccggtaataattgtattgatcac
atcttgcaagactcaagtctctcctaattgatcactatatgaacgatatatatgggtgaa
aaaaaaatttgggagatagaaaggaattgcatttgcatacataatcatgttttactacac
agtgtatatcgacgatgaccggttgaccggaaagaaaaatggcacgaggcgtatatagta
gattgaataattcgtttcattggttgctcttgtcaaatccaggcatcttgaatatgatgc
aagtatgcatgcaatactgcatggtgcttgaataattgcgctgatcacttatgcttgtca
ttgagaacaaattctctcattgttttcgttagaagaaaaagcaaaggatatgcttaagaa
ctgcaacatggcacttaaaaaatataagtctagaaataactgcatcgatcgtctacaaag
ggttgaagagaatcagatcaatgatgacgccctttaatttaaattagtgaagaagctcgt
tgctaacagccagcaaaggattattttgccgttgagggaaaatctctccaatagctaata
agtgatattcagggttgccgattgacactgatcatatttcatttaattatttaaacatca
tgtatctgtatatatgtagtactgcagagacaatccagaaccatgtacatatatgatcgg
atatatgcagagaggccgatcgaggttattttgtgcaatgttcgaagtgttgcttactac
tgatgatgcatgcatgatgaatcgccaattattccgtgtatgattttcaggtgtcctccg
agcccagttttttttttaatcaagcaacactcgatcgacagatgtgtttcattgatatag
tagaaaaaaatataagaaaacttcgaagtagttttggtgtttcaaactttcagtatatgt
tgcagaacttttgttacagtttggagcgaatatatatgtgtgtgtgaaaactaacattgc
catctcagctgctcttcagtaaaatgaaactcttcgtcgtttgccatggcgactggtttg
caaaacaacgtaatttgctggcgcaaatgcgcaacgacaagagattgtaaagaccaagag
tggtgatgaggtgacgactctagaaagtccccaagtgctcacacatgataggagagcatt
ccgagtgcgggtgcccgtcactgacctcaccacgcactactagcttggcagcacttcatc
gaccgagctgctcactcgatcgccagtacgctcctctctagcttttctatatatacatat
acacaatgcgtgtggccagtacacaggggatctggtagtagatcagtgtgtgtactactc
atcatcatatacacagctagctagaatctagatcgtacacaagtggacgcatctatcggc
agtctctttcttcttcctctcgatcgattgatccaagctcagctttgttggggcggcctt
tgtctctgtccggcgccctattccctattaaagcttcgaagaaggaattgaagggggcgg
agaccacgcgcgcgcctggccggggcagcagcagcagcagcagcagcagagcagccgagg
aggtgatggatcatcgatcg
>Pgl_GLEAN_10021620 PgMYB25
attttttttctagattaacaaaacatccctttgttatgatttgtgactgcacctatctga
aaaaaggctttctttgccataatgtgcattagcagttttcaaattctgctcaactgccat
cataatttcgtgaagagtttcattaaaaaattatgattagtgcttcattagttttatact
ttgctatattgctttgcagcatacagaaggatccagcagagaggatgtctgcttcagaac
tcttggtcagtccttgaagtttttatttaatagttttctgattgataacttggtattact
gtttcaccattcatttttgttagtggtgctgagttgccctttctgttgttgcagaatcat
cctttcataaagaagtttgagggtaaggatttggacctgcggactcttgtggagagcctg
gaacctccgatgaacatacccgagtagactaccattaagatggatcgacgatccacagca
atgtgtttaggatcaccgtggtggcctgttgatattcgcacatatttcttctgaaccgcg
tgcatcatgtccctaaatgtgggatgctgtgtgtatgtgattgctgcagaaaagatgtca
catggatctttttgacgcccaagtccttttattgtgttccttgatagaatgtttcttgta
gagttgtagcagagcatcacttgaaaaggctctccctagttcttgatgcattggactggc
ttcactcagaataactccgttccaaattataggtcgttttaattttattagattcataga
tgatattatgtatttaggtacacactgtgtctagatgcataataatatctatgattctag
aaaactcaaaatgacttataatttagaaagggggaattattttttgatttttcattgtaa
gttgcatgcatcaaacggggagagaaaaatatgatgggagttgaaacattccagagaaaa
aggcatcatatatcttggcatttctaagcgtgacacgagcatgcatgatttgcatcttta
atttcacgttgatccccaataattagctggagaacagattccctcatacttttatatatt
tcaaaagaggatatgcttacgaatcgcaacatgctgattaacaagcatagcctgtttcaa
ccgtcatcactcatatcggtgaatatgcttaatgatatgataaggtagccatcgtccctc
gttatgatcgtctagaaccaaaggcttcaagaatcacatcgacgacaaatggtgagatga
agctaaccatcatgaggtgactcattagtagttgagcgattaagattggctgccgtctga
tcttctcactaaactgtggacttcattagccaaattttcttgttcctgagcatcaaaata
aggatatgactctcaacagctgcttatatatccgctccagtataagctgcttatatactt
cttgtaaacatggtatggctaagcctgttttgtgtttttgaaatcaaaagtagtttgaaa
atatcataatcttgtcatattttgcagtacacacttaattacactggtcataattggtca
aagcggtagcttgttgattgcactgtatcagtgatcaaaattaaaagacacttgtctgta
aatgtaggtattattaggcaagatatgcaggcactagcttctatcatgcgggcggcactg
atccagccgctgagctcaccacgcaccattcggcactcacctgccttctcgatctatctc
taatctcttagccatatccaccattaattatactctgatcatgctctctctctaatctct
ctaaatctttcttcctctaaggctctaccctcatgtggacgtggacctgatataaagggg
aggccagccgaggggaaggaatcaaacgagctagctatctgcctagttcttcttcctcct
ctcgatcgatcgatccagcatccaggctcgatcttactttatttttctgtcgcctcgacg
ccagcgggagagcgtcgacc
>Pgl_GLEAN_10015908 PgMYB17
aatctctttttagcattttggtttcctgagtcattttttggtggtgctaactgagattcc
tttcccataggtgtcgatggtgccgaaacatgaggaacgaatgattgtccagtttgtaaa
aagttcataaaaccaccaggtggatagtaattcatgccactacaaaatcaagcaacccat
actacgttacttctaatgaaactaagatagctagtgaactaattgattttctggacataa
taaaccgaaaacaagttagcaagaaatttatataaaaattgaaacttactaatttgtgga
tgtggctgctgcaggtgcggcttgtggcaaaggtccaggccaccatactgtacagaatat
acatttaatttcaacagatctattttagttaatttgagccatgaaaattttgcaaaggtg
aacaggaggaatcgtggatggattttgcaccaccactgccgcaataggaggaatcttgaa
taaagaaaaataaattcccaagtggattacctggttggcctcctggagtaggaatggaag
caccagctccgcaaacaagtgcagatggatgaagcgtgggggcaggagcagatctggtct
gagatgcaggagtaggagccggagcagcttcgtcctgaactggtggcggagccatttggc
gcttggttctccagctcatcactggtagccgcagcttcttgccttcgccggagtcgtcga
ttcgcatgcgcgcgtcggcccctgagttcgtcctctctgcctccacaccttgccctctcc
actccctctgttggatatgattcgatctagggttcagaataggaagagcaaggtaggata
tagtggaggcgggagaagcaaagctgaggatgattttcgcgcgtagccatggaggattag
cgcatagccatggaggattcgcgcgcaacggtggaggcttcgcgcgcggtgaaggatcgg
ggcgcgcagcggacctgagtgcggtagaaaacgctagtggaatagctggtagctagcgac
gaggcctgcgatttggtgtattgtgcagcgtgcgagatgagcgacgaacaactagccggc
tcgatttttttcaccctctctctcttccacataggatacatgctgacatatacattcaaa
tagctagctgactcagcaccattgcgggtggccttacacttacaccatgtcgaactggca
ccagcacctggaaaaacgtcgcgcgaatcccagttggaacgcatgttctcgcactgttca
tggtcgagagtttgatagacacagtgacacagccacacaggtgctagttggaataacgtc
cggcattacacaggttttgcaccgtcgaatcggcgagatagctagcagcagctagctttg
cctgaattttcgatagagagaaagaagaacacccgccggatcaggcttcaaagttgtcgc
gccgctagcgtttggaagcacccgcacacggaatcaaaagtcggagcgctggagctgttt
gcttgctgtccacaatccacataactcctcctttagcccgcgaaaagttaacaataatta
taccggtagaaacaacaaagccatttcaccatgcgtgcttatgcatattatgcccacaag
gttaaaagcaaagcaaatcctctccacctcgtggggtcgtcaaacaaaagaaccgcgatg
ccagaacggcgagagacaaacgccaaagccaccatcatgccgtacgaccgcggaacggaa
cgggcgcgacgcgacggggctcacggctgtgctcgggcccctgtccctcgctataaaatc
cgtaggcctgcgcaccaccccgctgccgtcttgtacttgcgtgcctgcgcacccgtacgg
ctaggctacacaccgggtcaggtcagagaggctatctgctcactgctctgcagcatataa
gctgcagccctgtgtctgtgtgcgccgggtcggtcgaactgaaactgatcgtcgtcagtc
gtctctcggctgccgcggac
>Pgl_GLEAN_10034717 PgMYB6
tttggtgccattaagaggccgtgcatgttcacagtaagcacacattaacattatcagcca
ctactctgagtttgacttttgagatatctgctggttagtttattcctgcttcttccatag
cctcccatgcacgttttcctgcagcagtgcagcgatctcagaaaatcttgtgctttctta
ataagtaagattaagaaagcacaagattttcttgtgttttcttaagtgagatccagcacc
aaagccctctagtcctagttggttggtggagctgagttatggttgcaaccacccaggttt
gattcctcgttggagtgaattatggggttgattttaaaaaaatcccctcgccggtggggt
tcgggggttttctaagccgggagaaggtttcttcttcttaatgaaaaccgtggggcgatc
ttacccccaccagcttagttttttaagtaagatccagcggaggggtaaataagttgttag
gaccttggcaaacaaacaatcttggaacctttcaatggaaggtaaccggtacagtttggg
cgttcacttctcttagattggatctttgttacgttccttccatgtaccaatcaaatccgg
ctcatctggaacttttggaagacatattggagaactggaaaatggatatatttagtaatt
tagatatggagcacacaaggatgtcacaacaaaccaaaacactcgcatcagccccatctc
acttacagagttacagccctaaaatatcagcataagataatgagagctaagtgctaacgt
tagctagccgtcccaccaaatactctttggtttgaccctggataggaaaaaccaaacaac
taagtccaaattctctgccgttttaattactgtagcataataagtaaatgaattttgttg
gtcctggtgtttaaaactttgggaaaagctagctccttttttatgatcagttgaaaacta
cctgcaaaaagagtatcattgggaaaggctgcaaccacattcattcctttttccttttct
tccgaaaagtggcacttctgtgaccagcctcatgcatctcacagaagcaatgactttggt
acccgctaggcatcaacagttctgaagttgttccctactatagcctataggcttgattat
tttgtccttttttcgggggcaaattatttcgtcctttcacctcagccttaaaccaaaatg
gcaatcatataccatataggcaaaatgggattactgaaaacgactgcactctaactaaag
ctgtatcagaactaattgcatagctaaaaatacttcgactctaattatagctgctcacca
gaactgcatagtgacagagacttgccatgatgaaatcctcattccaaatcatttttaggc
actaaaagataatcatcgtactggtcacatcagactctaaaccgaagcatatcaaggggt
tgccatatattacctctccactagatcaaataactgatctttataccatagatttactga
aaaatccaagcctaagtccaaatgactttaaggctcctctcaatcaaagcaacggaccat
aaccttgacccatctcaccgaaggaaatgaatcatttctttgcctcaccccaacaccaac
ctggactcggtgtcacctgtggggcctgatcaaccacggagttattacgatttttaattc
atgggccacgtcgaactggacctgagtgttaaactgaccctcaaatgaaggccttttgtt
tgttactgtatttttacgatcagtagatcaacagggaggtacctctacctgactacctgt
acctcgcagccaaactgaagcaaaccaacacaagggcatttatgtcatgataaggcatgg
aaaattcagtgctgatacctcctatcatgctaatgacttatagcagtgtgtcttgtcttc
ttctcatcctgctctatttatcctccaccctctgcactgagaagcttgacttcagaaaga
taacacaccacactgcttca
>Pgl_GLEAN_10034708 PgMYB5
gttcggttggctggtggctgatggctggtgctggtttgttctgagagaagagtactgttg
gctggttgctggtggctggtttgttgtgagagaaaaatactgctggccggacaggctcgt
ggctggtaagccgatcgaccagggcgtgctccatagtccatggcagcggtcatggtgttc
cctcaacatatataatgatcaccaacagctagatccgtcatctttgcggtgggacctaga
ttgtatttattaagccatttagcccttaccatcgtaaagcaactaatagccatctaaata
gcttactaaatgaaactatagtagcaaataatgactactccacatggaagcatgctataa
ccggagatagtgacggctatagccggctatctaaaaacattgcttcctagaaaggcattg
ccggtggtatttcctagctacctatgcctattgatctctctctgggtcatgatgatctgt
gtgtttatccacagatagatggcaacgttgtgagatttcgagactgcgtggcgagaaaga
tgcaaaaccgggctctatggttgttctagggtgattagcgagagattatctcattgacaa
cagcacacgcacacacggcgcacgtacgttttcccgttattgccgactagtatagcagtt
tacacgcggtgctttttactggcgtacagtacagtacagggagccggagacgtactgttg
ggcgcatgtacacgtacgttcggacgtaccgatccactgttaactgttgagagtgaaaac
tgatgaatgaaaggggagggagagagatcgatgagacgatcaggcgatcaggcatggact
tgcttctctctctcttttccctctggtggtgtctgggctgagccacacatgtggtgagat
atgacatctacacgtgcggtggggacgcccggtgaaaacccggtgaaagctagccatggg
aggagggaagggggtggcagcagtggtggccgtgtagcgctagtgtagacagctggggca
gtgacaagccttgcgtgcagtaagatcttctgcacctctcacaggcacagccccggccta
cctccccctaacttctttttaaccgcgctccatcagccaagtcactgactgaactcgcgt
taactgaactcattttgcaggtttgctcttgttcagctgatctgttcagttagtacgttc
gattggcagataaaatagtgttatacgagaggaaataagtcgaacaagcagtcacaaaac
gagccaaaacaaaccgaataggctctataattttcagattggtcctaagtcgtgtgtatc
agcctgttcggcgggcatacgaatagtgctcgactggctttttttctacccatttcgtca
cataatactattcattctaccagccgattactattcattctacctgccgaagacgacaga
cagtacgtactagtgaggtggcggtgtgacgccgagggagacgccggcacgtccccaccg
cggggaggaagggagctatcgcactcgcggcctccgtcgtgccctgtaatccccgacccg
gagcagcctccaccggcgcgcataaatgggtgtcggcgacccgcgagccaggcagccagc
acagacgatcccctcccctccccttcccctggcctccagcggcagctaacctatccaaca
gtgaaaagcacacggccctctcctgtcctctcctctgcggcgcgctgcgtttttagcgac
agggagtgcgtgcggctgcggccggagctccgtcttctgacgggactgggagagtgtgag
agagaaccaaaggctggctagctagctctccctcctctctacctcgctgctggggctcta
gctccccgctagctctatcgtctccgggcgggcgggcgtgcgtgcgggttccagctgcgc
aaggaaaaggtagctatagcgagcagtgccgcagcatcctctcatctcctgctctcacca
ggacgacgacgtacggtacg
>Pgl_GLEAN_10019982 PgMYB3
gaccttcggagctctcgcgcgtcgtagctttaggttgcagccgcggtgtggggcaaccca
aagggcgaccccccccttttatagtaatgagtcccaataatcgcgccgatgacgaccgaa
attacagttttacccagtaataaccccccacaacggtaaaattcccaaggggcaacgcac
gtcttttttcaggttgccgcgtcagcgtgggccgtccgggggagttccgaagtccattct
tcaccacgacaaggtcaatcgtaagttcggcccatcgtaggttcaggacggccctcactg
acgaggggctactgttggggaagttggtcttcggaagcctcaccctcgtctggccacgct
gacgaccttcggtccgcacacggcttcggtctcgcggagaaaccttcgctgtacgggtgt
taacagaaacgctaacactgctcatgttacgtgaggattgttgtgcagggatggtcccac
atggcggcgccggcctacagtgccgaaggcacggatggttgtactccggcgacgaagggt
cgagagggccatgaacgaggtgcgccggccgggaacatcgcgtccgggccagtggcggca
cggaggagatgcccgaagaggtgcgacgcgtccagggcaggatcgctactttggcgccga
aggtgcagcgatcctggacacgtggctgccgccgtcgtgtaaagagggctccgtacgagg
cagagacaagaggtgccgcgtgtaaaggcgtttcggccgtacgaagacacgctggaggcc
tgtacgacgcggggacttactcttatacccttgtaaagtgtttaaagcagattgtcagga
acggaaaaggtgtaattgaggcaaatgactatacccaggggtctcctataaatagtgaac
cccttgtaatgaaacggacacaccgtaatgagaagagagcaccgaaggcagtcgcagttc
cttcgttcttcggtctgctaagtattcccttgtgttctccttgtgttgtttagtttctgc
atcttccttcttagcgctggtggcagtagtacccttcgcggtagtaagcagagggtgaga
gagaaaaaaggggctgttgtgtcggagtccacccttcgggcccgatttccaccaacagta
gacacgctttaatttgctcactgaataaatccactcacgtgtgcctgcatcactgtgggc
ttaacctatatatctctttggaaaggtgaatacacatttgatgattagatccacaccacg
aggatccccaatcgatttcggtaataagtctgaactgaactgaactgaactccaagagaa
aaagaggcagcctgtgcacacacagtcacacacaatcacacacacacggtgcccatcaat
gcccaagaaatctggagagacgacgacggcggcggcggcgcaaacaagctacatagcgca
gcgcaattactccgctcatgggcggccacagcgaaaaaggggaagtcctcgagcaacacg
tcaaccgttcgttcttgatgcgcacacgaacaaaagccaaagcaaagcaaagcaaagatc
gccggaacggcgcccgttcatgtgatcacctggctgactttctcgtcggaaagcaacagc
gcgagatcaaaagcaggagagcagaggcttatgaggtcatgcagtatataagcactcaca
tgtggcgagcgatcgcgctagggcaaggggacaggtaggagataaagctgctgttgctgc
tgctgctgttgctgctgctagctgcagggttacacaggtgacctggccggtgttgtggtg
tgtgtgtgtcgtgtagaataaaaggggccagcagagagggttcgagggagaagctaggcc
ggaaggtttcggaggccgttgtgcagcagggccatggctgtgtaggcagcagccagagct
cttcttgctcctcaacttgcctatctgctactagctagttatagctaggtgtataaaaga
ggtaggaggaggtagaaggt
>Pgl_GLEAN_10038224 PgMYB31
ctgcggtgtagcctgtgtactacatgtgacaaaatcaactacggagtagtacgtagaatt
gagttcgaaagcataaatagctttcgttcaataagaaattcttaggaaaaacaatggaca
aagctatcgctagctgtccactttcatggacttcttttttaatttgacggttcaccgtac
cgcgggggacgaatacttttgatggacttgggagtaacttccggcggtcagaaattgtca
agaaaaactactacttcatcttctctttctctctcagaaacgcacaaattaatgaacaca
cactatttttccctcgtaacaaattaaatcaactgtacaaagcagcagcaggagatccac
agaacaaaaaatgataaattaaaaatggtcggaggagacatgagagtcgtattgttgttc
cactgaggaaatgacttcacttacggtcaaggacatgattcatgacgatttttatctaat
tattaagcttatattattcgccaaacatgtttgtgccgcaaagatttcagtttcaggtgt
tagaattccatagggattttattgctagctaacgtttacaagaaaatttaaaatttcttg
caagaatcatgaaaatcctctgcatcaacaaacaaacaatttggagaatagtcttttttg
ctactaatctgaaccaacctggatctataggccatatgtttggtacatggctggacaacc
aacctaaaaagataaaaggtttaatctgggttggtacatctgcgttatgctgggctatct
ggcgttgccggaatgatgtaatttttaagaaattgaaaactaactctattatgcaggtta
tttttaggggaacatactggctacgctcttgggcccagttacagcgtgacgagcaagcca
aggacaccctcactctgatgggcaagaaattagagtttattgctttagaggtctcaaaca
aggggtggaagcacgttgctcatttgctttagtctttccatcttttaagactttggttca
gtgtctttttccaagaacgctttgtaataattggctgtgtacatctcgatctgatgtaga
ggccagattttgtaattctttatctaaaaaatcaacaaacaaaggcagtagaattttctg
acacacgccgatcctttttttagtttaaagtttaaactaatcaatgtgctgatgtaattt
tattgctttagcagctggtttaatttcataaaagcatcagcacttcaaagcatgacactg
aaaatatatatttatttggaaataaagataaaattgcgaaaagaatagggtgacttaaca
catgtacggaggagtacgtacctagaaatctggcatatggaaggaaaaattattcagccg
gcgccaaattttcagtgtaatatatatatattaattaatacacagcatactgcaatgact
taatatgttatatggaaacgaatacaaatatgtagatatatatgcatgggtcgctgcaaa
acaaaatgtctgaggatttttcccgcaaaaaaaatatgtatatgagtgtttgtcatgttt
caacatatatatacacgacgtatgtattttcgtattattagagtctaaaacaacatggca
tatgggtgacgttagatgaacaacaatggatacctactgccccgagacaaacatctctaa
gcccaggaaaggaaatcatcagtaataaaaaatggaacttggatgcatctactacggatc
aaccgggagcagaattaggagaagcttcagaagcacacacctacccaccaaaccgaaatc
catccctatagggctgcgcttaccctacctacctacttactcggtcaaatgtcttagcgt
ggagcgatctgggtcagtggagccctcattctctcttctccacatataaacgcgccccca
cttctctcttctcacaacaacactcgccatcactccctggtccgtgcggagatcgattga
gctagctagaagcatcaggc
>Pgl_GLEAN_10038222 PgMYB30
aatagtatacgtacaggtattagtagcatatatatatccacagcaggagatgatgggcac
tgtattaattcgatcgtgaagacggcaatgactatatatatgcatgatgtgggactaaat
ctaccgtttttcagtctagtttttgttagaacaactagataacatattgtttcgtggctt
tttgtccctatacaaattaaaggctgctccattccggcaaaagtacctactactctcttt
ccttttctgcatatatacatcaaatgcctttggaaattaaagataaaggagaagggtagg
tatagtaaagggctaccgaacacctgttaaccaaaccctaaaaacaaagttgctgagcgc
ttattatattatctgggagtgtgaattccaatgcaaatgcaaggaatcttctcgctcctg
tctgcgcgcgaccgatgatacatgaccatatgctgagaaaagtagacgagtagcagtaaa
caacaagctaggggtggtctctgagagattaaaaactcgaacgtttaaagtgagagaagg
gcagttattagttgttgatcaaccaactaattacgattcttaattaaatggccccctctt
ctcctttctggttcagttccatgcaagcttgtttctttacttgcttccgtcttcaattaa
ttctaacgatatatagtaattaataaggagaacgaagcgattgcgacatgctcgatcgag
ctagcttctagaatctttgaaaagcagtcatctatatagtgatgacaccaaaaaaaaaag
tggtctcggttaaaagtaggggaaaagggagcactttagagagaaaaatgcatgcatatt
ggacattgccaaactcgtgggcacgtacatatcaggacaagctccacacatatagaccag
atatttaatgttgtatagtagtatacttttgttctttttttactacactactactgctgc
tgcacaattcttcttcttttgttttatgccgattatatatacagtaaaattagaactcca
agatcatatataaaaggttcactgcatgcggtgacccaaacagaaatggttgtccgccta
acatttacagatatatatcagcatatctcaactttgtataaatgaagtataaagtgaaat
tgtaaaagagaaacaaaataatgggaaaattaagatgttctaaggtgtgagataatcaaa
acatggtagcactaattggcagcatgaacccaaaacatagtacacaaaaaaaaacggaag
tattaaataatttaaaaagaaaccaaaaatcacaaaagagcttggagtgggaaaaactcg
ccaaaattcagatctcccgtcgtggtgaggtcctactcatgcgccgcttcgacatggagg
cgagcgagctcgacagtgtcttcaaggccagcttgacaggtggcttcgctgacaaggttt
tggacactctacccatacggagggcaagcgccagcgaggctcttcgggaggggttgctca
ttgtttgagccacacccccctcacctaggttgtgtgtagcttgtagcggggagtagtagc
actatgtgttattttgttcgtccgaggtctctctttcatatagctgcgcagggagttcgg
cgtgcgtctgactggccacacgctggtgtaacaatctattttcatctcttaatttaatga
cacgcagcctctctcctgcctatttgagagagagagagaaaaagacaaagacaggcaccc
acctacaccacactcacactacctcctccctagggcttcgcaactagtactcctactcgt
ttctctctctcacccacctacccggtcaaatgtgtcttgagtgatcccggtcagtgagcc
tctctcgatcggtctcatcatataaacgcacgctctcttctgtagctctcctctctctct
ccacatccctgcccaacaagaaccaaataccactgcactccaccttgcattgtctcttga
ttcttgagagagaaccaagc
>Pgl_GLEAN_10029419 PgMYB22
ttctagtgccagccttgctaattgccatgctgctgctgccgctactcgccagccttccct
tctctcagaaccactcaaaaataatgccacctctttccgtatcataaaacacaaaggaat
tatgcaaaacgatgcagcaattaaactcagtagtggttttgcgccacaattaaaattgtg
ttagggtcatcccgcccagattctgagaagcaatgcataattctgagaagggaaaaagag
aactagcagtcacagacatgcggtaggttgttacctgaccgtcctttttcccttcagctc
aactgcaagtcctgcatggaggaagaacagatggtgacattgattctaggagcatccatt
taatttgcagagttcaaacagcaaatagtatatagacaatcttcagaaataataatatac
gctacaccgcccacaacagacaatacaaggctccagaacggatgagatccgttgcatggg
gaatcaaaggacaaaatgatcagctggaaaaccagactaaaaaattggtcaatcgtaacc
tttttgattcgcgccgcgtttgtttaattggcgagtatccaccgtcacatgggcacagat
ggacgccattgcaatcctaatcatggaatcatggataaaaacagtccttcgtcagacaag
aaaaggataccaacaataatatgtgcattgaccagctcgtttccgatagtatactccaaa
aaatatgtctcctccactggaacttttttttgcattaaaaaattatgaaaaaaaaatcac
aggcatgagtccccccctcgcaatgatcagcgcctccattgacgccatcgacagtcaatc
agacaaatcattatacttgtacctgtgcgattatctttgcagttatgggaagcccaattc
ttaaccgattcagcgcctgcaacatgcttcttcttggactggagaagtaaccatttctga
ttagaattgctagccagcctgctagctgccagagataaacaaaaggaagatgctctctgt
cctggaatacgaacatatggtgccacctctttttccccaggaccccaactgtgatgattg
accagggctttttccccagagataagtgacacagtgagttacctgaaaagtaagagggca
aaaggacaacacttaagtctgacacataaaatcttgcaggtgggaagaaaatgaggtgca
catgcacgcacgaaatgaacagcagcaaagacaacgagttttaattagcaacagaagaaa
ggtggacactgcatggacatggagtacccgtgatatagaagcagctgcagaaaagaaaaa
ggaaacaaaacagagttcactggctgctctgagtcacaatcattcaccatggcagcaaga
gcatcaatccatttccaaataatgtacactctgatggacacgtttcactttcactgcctt
gctcctgaagaagtacaccaggcaacaggcatgtgaattgggtttgaaggaaatgggaga
gaattaacagtaacagttgcacaaaggtcgcgacaattaaaatatcggtggaggtggcta
ccccaccggttttgtcaccagacatagattcttaggagatgacgagacagacacccacgc
agagccggaagcaaccgtggggaaggctaaacctcccctcccacaaccacctccaccacc
acctttaaaagaaggtgctaaagggctgtcctgcaaagaaaaggagaggagtgcccctaa
catttccttgctttccactgaaatctcctatctgcaaccatacagttgctcaattctgct
ctcagctgcagcccaatcattcaccagtatataagtcactacaccatctgcatttcacac
cccttcagccaccatcaatccttgaagaagcttcgtgctaccggagaaggtgctggctgt
gcataattggaggttgtatacattccacagacctgtcagttctgtggatttggagctccc
aggttctgcattgcactgag
>Pgl_GLEAN_10031720 PgMYB7
ctttgggttgggccaccacccccaacaacatctctcgtccatcaccagggggnnnnnnnn
nnnnnnnnnnnnngggggggggggggggggcatgtcatgcgtggctggcgacctgatctt
gcttgttccttttgtgtggcaagtggtgacccttctgctctctgctgcacgggctacctg
gcacggccacctggtcactcctaattcagtggggggaccggcccctctgggatgatgata
tatatgattttctcacatcccatgtcaaaaagggcttattggcagccaatctgaatgtct
ggttgaggaatgatggaggggttaatggatgacagtggatcgaaagcttcggtcgcgcga
tcgaccattatcgatgatttttttttccatggattctcaacttatcggtggcggatcggc
ctcgcaacgacaccgaaacgcggcgttcttgacggcatggaccgggtcaagccggggtgc
tgcttttgctgcttagttgtgtgtaaagagtgcttcatcatgttggtagagtggtgatga
ctaagaaaaatgcttaaattttgttagtacgtgaacttctaactaggaggatatgcttca
ctataatctcctcattattgattgctgctgaataagaacgagaaggaccacctatttgac
ttggaagtcccaaatttagcatgaattggaacaggccggtccatgaatgaacaaaattaa
ggattgaccgattgatgaaggggaaaaaacaagcaactggttattcattcattcgacctg
ttcttgttcttggagtgaaaccttgactgtaactgccggttggtgaatcagccgaatccg
cagtcaactaaaacgaacaaattatcagctcaccacttcctcacctcccgatcaagctgc
ttgctactatccatatcactctttttaccgctcgacttttacaccctctttcaccgtcct
cgctaccatttctttctcttttctcattttctctcccagtgcgacgcgcgtttgcaagaa
acacgggaggaggtgagtaaaaaatgaactaatttttcctcaaatccctcccgttataca
caatactatatcaccccaatgaacttgatgtcacgggggcgaagctagctcctccatgta
ctgactgacattctgacgacgagactgaacgcaatatgtcaacctgatctcttccgtgtg
ctgtgcagcagcgttgttcaaacattccagcgtgctgaattccttgaccgaccgaccgat
gtcctcctagtacacgcgcacacgagtacatttcatcgcagttgccagttgcactgttcg
ggacggaaagaaaaatctatgcatctgcacgcggcttctgaaggatctagaaacaactga
ccgccgggacgaactgaacttccttaatcgatcggtcggcagtacgtgaaatctcttttc
gagtgaaatgaaaaggagaaattaaagaaatccgtgtggataatatttgtttctggagca
cgaaaaggtgaagaggggcaaaaaaaaaggcagcagaggctttgcagtgcagcacttgca
attgcaacgcaagcaaaagggacccatgagcagacgcccggcagcagtcgcagggcggca
cgtagagtgaacgacgccgacggctcgccgccgggggggccacccccgcctgtcaggcta
gtctcttgaggccgggatcgacgacgtcacgcgcacgcgagcggagacgaggacggcgga
cgtgtagtagtcttcccttggtgactactgcatgtagatgtaggcatggcaagttggtaa
ccttgtactactcctctgctcgactgctctcccctgccctggagccttataaaggcaggt
gaggtgagccactgctgcaccttgatccgtagagatagataggttcctagctagctcgct
atccatctcgaccaccattgctggaccttgctgacctgaccttgatcagctgtgtgtgtg
cgtgagtgggggcggggata
>Pgl_GLEAN_10012352 PgMYB1
ttcttctccatgcatacataaatggtacgcaaaagagagtaatgagtggtagaaagatga
ccaggagcttaaaaagatcaatcattcatctcactcacttatcaatcaaccaagacgtca
gaaatataacaaagatggcatatgttgtatgataaatcatgttcacttctgatgaagcaa
acactggaccaagaaaaaggatgcacacttcaaaaaaaacaaataatcaaatctccaaga
ttgactttgttttttccaaatagattgctatagcagagaggaggcagcaaccgatacttg
ggcagccactgtatctgccaacttacctaaagcatacagtactatgcagtgcaactcagt
tatatgttgatattactcagttattatactctatcaactggaatacaggtaataaaacat
actatccagttggaattcacagtcaacagaatatgaaacgcaaaaaaaaaaattgcaacc
ataagaaagctggttattacatgagctaatttattacatagttgatatgtgcatttttca
aatattgcagaacatgttctgctagaaatatcgctgctgctttctgctaccttgttaaaa
acaacttcaacactcccactttcgatacgttccatctaaaacacatgcagacatgttatc
agtagtaccatcagtaaatcatatatgcactgcataaaacagcacaagtcatcctagtac
tcgatatagacacaccaaagattacttttatgtggctcaactaacaccaaaacgacattt
cttacatggcatgctcagtggaagaatatgcattttgctgatttgtgcatggcttctatg
gaaggtatgtgcatgactaagatatttccctatgcttaggataatggctgacaagaaaag
acagatggagtcctcagtgccaatgattacggctgatagaaaagcaagtgctttttactt
cccgggaaagaaatggggaacagtcccgagaaagtttgccacactctatgagtgtcatgg
attaaaatcaagaattttcaaatggcaaacatcatcactcaccggtaaaaagttcagatg
aagagtaggggaacatttttttcaatttgtgaaaacaccagcagtaaaaagttcagatga
agagtacgtaggtaaaagtctaagaaatatctaaaaaggaaaacaaaaatgattgaacaa
ttttgacatatttgatactaggtatgggttgcttaaaccaagaaccgggatccacttcag
acgtctatttgtcttatcaaagaataatatgcttaaggcattaatgctactggcttacaa
gatatccaaatgacgatagccacaacactttctgcttgtcctttttccataacaaaacat
aataaaacatctcgttacacagaaaaaaaaaaggaaatagagttctccgttgatttatat
caaaatgattgtgctattacacaaaagtttgtggagtcaacttacagtcacagagataac
agataagagaaaagaattacatgatcagtctgaatccattatgaacaaagtcagcttgag
tctgagcatagggaaaacagttctcttagctgagtcataaccacaacgtcatgtgatcac
acaggtgcttcccgtttttttattnnnnnnnnnnnnnnnnnnnnnnnnnnnnnnnnnnnn
nnnnnnnnnnnnnnnnnnnnnnnnnnnnnnnnnnnnnnnnnnnnnnnnnnnnnnnnnnnn
nnnnnnnnnnnnnnnnggggggggggcaggggggcagaagggcttcccctgttgcctata
aatgagtggcaaaagccagcaatccagtaccagcaagacttagtggcttcctcccttagt
agcaccttcttcctatcatgctggagttcatcaaggatcaaaaccagaagcttcccacga
tcacacagagaaagaagagcaccaagactggttcccagcctatccaaggtagaagtgagc
aacgttagtgtgccagtaac
>Pgl_GLEAN_10034693 PgMYB4
tgtacaatagatgtgaaactatttaattttcatggaacaaaacaaaaacaaaagccactt
ttggttcgtgtgaacttcactacttcatcagactccggccaaactgatattagcatgcac
aaatgaatgtgtaccattcaatttccacaaaataaaagaaaaatcaaaagctaatacaat
gcatttgcacttcacttcgcgtgggattcccaacctacttttttatacaatagatgcaaa
actatttaatttccacggaaaaaacaaaatcaaaagccgctttcggtaacgtaaatttta
ctacttcatcacaacgtgcacgaacggatgcgtagaccatttaattttcaaaacaaaaga
aatcaaaattttatatagtgcatttacgcctcaccttcgcgtgggactcccaacctactt
cctcatacaatgggtgcaaaactagttaagttgcatgtaaaaacagaaccaaaccacgat
ttcggtacacgtaaacttcactaaatcatcacaccccagtcaacctgatctcagcatgca
cgagcggggacgtagaccatttaatttctacagaacaaaaacatccaaacccagcggcaa
aagctgctttcggcgcatgtaatacctcattgcttcatgaggttccggtcaaacaatttt
catgagacgagacaaaacccggtgcatgcatgtaaaagataccatagtacattgcactct
gggcaaaactataaccgactttgtcgggcacgcaaaacgatgtgcggaccgatctcgcaa
aacaaacccaacaagcagaggggcatttgagaaatcaccccttacctttctttttctctc
tctttgcacgaataggcgacacgtttgcgttttcctaataatagcaaggctttgcataac
atttcaaagccgtgaggattttgtagatttaagcagaaacgaaacacagggccgccaact
gcgcctggttcttgagccggtgccaccaggtgagccgcggcgggcgttcacacttgactc
ccccagaagccgggaaatgcattgaacgaggcgttccctttttctgctagtacatcgaac
gcagatcgacgacggcagcaggtaccgtgacgcgaaggtcgaagccttgacggcttgacc
tcccaacccaacacatcggaggtccgaggtcgaagctagccacctcactgaacctgcgac
cgatccgagatcgagccgtctcttctggacagcggcatgtgtaggtagcagtcggttcct
cggccggaacacgtcggcgttccgcaccacgcctcgacaccggcggaatcgaatggtcgc
cgtcacagattcacacagatcgtgtcgatttcccgtcaagaaaacaacccagaaccgcag
gcattatgtgcgcgcgccgcggggccggtcggccgggccacgcccacgctctccgtccac
agcgtgcgnnnnnnnnnnnnnnnnnnnnnnnnnnnnnnnnnnnnnnnnnnnnnnnnnnnn
nnnnnnnnnnnnnnnnnnnnnnnnnnnnnnnnnnnnnnnnnnnnnnnnnnnnnnnnnnnn
nnnnnnnnnnnnnnnnnnnnnnnnnnnnnnnnnnnnngacgacgagcgcgcgtgtcacgg
ccttggccgggtcccgtccccgtgcacgtgtacgtggctcgtggcggacagagcagcaga
aatggcagcctgcgagagtctcgagtttgtttgggtgtggtggcctttctctctctcgcc
ccggccgcttcctccccggggcggtcaaacgcaggcaggggggtggtgggcccggccgcg
caggcctgcgcggggtcgcctataaaagcaccccggccgggcaccgaccggcctcaccat
cctgcgctggacacccttgtctcgcgttgaagaaattcaccgtagccagggggggtcaaa
tctcctcctcatcctctctggccaagcagccacagggctcttcgctgctggggggaatga
gaactgagaagtgaggagga
>Pgl_GLEAN_10002927 PgMYB37
agttcgaaatatgtacggagtatatatgtggttgaaaaaactgtttcacagctttggaaa
atgcgcgatatcaccaatgtgttgcgcagtattaaaatggaaacacttgacagcaaagga
agaattagaagtagtgtgcttatttagttacaacccacagttgacctgcagagcaggcca
acagagatatataatttgtggattggccgggccggggtaggtctgaggcgcccaacagca
ctagaaaacccgcagcgactactactggctgtagtggcttacttgttggatcttcgtcgc
tagctgcaacggcctacaggcagaaacaaccagtcctcagctccccctactactgccagc
atgcaaagagcaacaaactttctgactctgtccaagacatgcatgcatgcatgcatgagc
atcgaaaactgctcagtgctcatacaactaacaataacaagtaacaagggcccaacaaac
atgacattaagatcgattttatggctcgaaacaatggtaggtaaatttacacctatatat
ttctaaaactttttttttgaaacaccgctacgttttccattataaaaagcatcaacttgt
acttgttgaaatccatggagagaccgatcgatctgatcatgtgttcttcacataatgctg
ctgattaatgaagcccaacgcagaggggattatattttaaggtatgttactaaaattagg
tgccgagtacgctcgcgtgtggagggagagtgatgggttggttttaagtagacgttgtag
gtttgaaacatcagagggatgttgagacctgaacaacagaattccccccaccaagcaacc
ctacgacacgcagccgcgcaccgcatctctttccggttcctcccaaactccctaaaacca
tgcattaggtgcaccaggtggagaattccctcgcacacaacgatcgaattgaagcttgtg
tgatctgagaaaataacaagtgatctctctgaaaggtacgtacatgctgctaatattata
tatatccctcaaaattaaaccaataagctaggtacacaaatactaaatggtctccgtcta
tctaatgaaaacatgcatcctagctaattagatgagcgctgatgaacgaaaccaaatttt
ggtttgtatatatcacagttttttagcagatacatgtgtaaaaaagcgttcaaatcctaa
atgttgtcagactaatcttctgcagctctccaactgtcttaggaaataatcgataaaaca
gttaaattaattaatacacgctggttcctgcaaatgtcatgtgcagttggcgctactaca
acacacatgcagatcatgcctgcctgcctgggccctggtccctagctatatctagtttgt
tgaacaattgtaaccggcgaggtagttagtcgatcttgtggacctatagcatgtaactaa
catattctattcatcaatcgatccccggcgcgaagcttaacgtacaaaaccacccgttag
cccacacgtagcatcaaactaactctggtgtaaccatctcctaactcactatcttctccc
tcactaacgatcaccaacaacgccgagagaggggaaaagaaaactgcccaccactttccc
ttcttatatacccctggccggaccttatctctctccctctgcctatatagctctcgtcct
ccctcttccacatccttgttcatatccaccctctccctccagctcgcccagcatcgatcg
atcgattcgtgttcttcgtcctccaccacctagctagctagctcagttgttgctgattct
tcttgccctgctgctgctaattaatttattccgccctcgctcgctgcggccttagctgct
attaggaagctgatgagtggtaggaggcggtggtgcaagattattgcggcgaattgaagg
atatatatagagagaaagagagcttcagattagcagtctgtttgttgattgcgcgatcga
tcgatcgagagtgagagagg
>Pgl_GLEAN_10023164 PgMYB59
ttgaaaaaacggaaaatgaataaaaaataaaaaaaattatacgcttatagttacagtggc
ttctgaagcccacgagcactcgtgggccgttctcgtttgcagcgcttttcagctcaggaa
ccctcagcttccgtcgtccgacccgcagcagtcggcaacggcggctgttctctgttctct
cagccgccgaaaccttgccactgcccccagtcgtggcacccatcttcttacctgaagcag
ccaaggtgagaaaggaggagcgagcctgctctttggcacggcgtggttctccatcctgag
caacggccatttcttgtgcaacggcgtagcttcaccttggaagctgcgtttggttgcttc
gatctgagctggcctgagctgaaatcggtctgctctggaggcggccatggttcggagcgc
aggcagcgtccaaaggcgggggtaattatgctgtccttttcttaattcaattccgtgccc
ccaccgtttcttggttcaggacggcattgctcttctaggcagtatggctatttagctggt
aatccagaaaagaagcaacaattttcagtgacatccgccttgttttgaattggattgtag
gacgcctaccaagccagcaagttgctcacgcgaaattgattggattgcagaagaggtgga
attacgtaaccttcagtccactagtatcttacacgaagtttacaatgatttgagtggcat
ctgtagatcccaatcgtgtggggactgctccactcgtactcattctcaatttctcgtaga
tcattgcagaagcacatcctttcatgtttcaggcaatatttcatcatgtcaaatattcat
tctatatgatatttgatcatttctaatcatttgaatggattttatatagtacatgttctc
tgaatgaactcttactgcagcatgatgagcccctacaagcttctgaatattttgatgacg
aagaaccggaagggacaggtaattatagtttgatcaattgtaatttcaattcttgactag
attaaaaatttgcacatccatttcctcacaatctgtgtccactgtggtgctagaaccaac
tttcttaatcaattgacttgtcagatgagctggcatttgttaactgataccaatcatcac
tgatgaaactactttctcagtttctctacaaccaagtaagagttagtctcctacatgtgc
atctatatggatatggcagaaattgctctaatattagtgttcgattttttctctgcaaac
tatgtgtaatgtatgatgttggcatgcagatggttatgaccaagtgtatttttatgagta
aatatgtgacaattgttcttggaacattattaccccctctgccagtgtcaaatctcccag
catatttttcttatagaagtcttcattaataagtcttgtaataagaatgcttttgtagct
aaaatgataggctgtggtgatttcagtaaaattcttaacaaactgagtcaaggaagagga
atggattagttacttgtgtcttgttttttgacgaatcttatagtgttacaaaacatggac
actcatctgtaacatgatggtgtaaagactgtaattttgcttatgttagacctgtggatg
caaatggtgacctgtgtaggattccactttggaaacaaaaaatttataatgttaattctg
cattacctcagttaaatcataattttctagagcatttctgtcttcgtagcaatagtctgg
aaagtttgcatccataactaccacttgccctcctgcaagttcattttgtctttatcatct
gcaatctcaatagttttgattcaactgtcttactgaatgcatgccttccaagacagtttc
attcaagaggaggggggcatggtcacaagaggaaagttattagttcatatgagctacctt
tatttttgtatattgttctgcattagtgagttgttgaaacaaaattagttgtatttcagg
aagacgagattctaattcaa
>Pgl_GLEAN_10009335 PgMYB41
cgcgctgcatgtatgtagaaatgcccacagatcggcgtagcgtatctatccaatatatct
atcctaaataaagccagcccgtcatgacattttgcaccagcactggcagatggggccccc
cctggcccctgcaacctgcatgccgctccgacgccttccacgctgtgtatcccttttttc
cccccaccttttctgggtgcttgtccccagcctaacggcctgctggctgctgccaacggc
cctgtcgaacaagattgttccttttctaaaaacacaagcagagatgagcggaagtgaaaa
ctcaccggttctacctactgtttttacacccgcaactgcactaagggagtcatttagatt
tcttttaaaaaggtatggattaaaataactgccaacaatatcaacctttgtttcattgat
gtatcatgcactgtggtgcatctcgcataatagcttcctcctttccaacaatccaacact
ccacatatgattggaagtcgtcgacattcaatagaacatttcgtgtttaaattgatgaga
ctatccgctccactctgtataaatataaaaaccacaaattatttttaggctattttttta
taaatacccaacgactttgccaagtaaatgttaatcgattgtcgtttcgtgcctcttatc
catttcaatgaatggcgcttctctgatccgggttcagcggacgcttttctcgttcaattg
gctagatctagcatttgtcatgataaggaaaatttgaatttcgcgccacgttcctcaata
tatgtcgttgcatcccccgttgcattatatcggtacattccaaaatcaaacattaaatat
atgaatgagatgaaactagtcgctccaccgtgtgcaaaacgacaaaactcatcgaaagtt
aatttttcaaaaatacgcaacggctctgtcgagcaaccgccaatcgatgtcctttcatgc
ctcgcatccgtttcaatgcatggcgtttccgatgtaccggcttaaccgccacttttctcc
tcaaattcgccaaatctagcattgtcgcgacgcggaaaaaaaaggaattccgcgccaaat
ccatcaaatacagtacgttccatgagcctgtttttcacttagcttcaaccacgagataca
actcccttgcaaaaattttcaccttccaaacgcaacacagtacattattcgcaaacggga
tgaagagaatatgtgcaggcaggcacggccggccacatccagatggcatagcggcgtatc
catctatatccctcgcaataaaagcagcccggctcacatgacattcgcgacgtgcagcag
cactgacgggtggggccagcgcggtttcccggccgtccacgtcgcgcgcgtacgccgtga
gcaagtgatgtggagccacaccggaccgggcggccgaaagggaaaaaaatttgtacagaa
gtgacctccgcgcagtcatgtctccgattctcgccgcgtgggcacggagcggatcggacg
tctcccgacgggggaagcggtcagagagagttggaacgtccctcgcccgagctgatctgg
gccgtcggacgcaaaagagatggacgacaggggcggcgcaggccccgctataaatgtcca
cccagaccggcacgccggtcctcacttgccagcggtgactcttcttctacttctactgcc
tcatcctcccccttttctccccagaccccagagaagaaatcctctgttgggacctccggg
attcccctcgccctagctcggaacctcgagctcgggtgtggagatggactccggcagctc
gtcggtatgcttctgccagggcgtggcaactggtcccgtgcacctcggcggcggcggcgg
cggcgccgccgccacnnnnnnnnnnnnnnnnnnnnnnnnnnnnnnnnnnnnnnnnnnnnn
nnnnnnnnnnnnnnnnnnnnnnnnnnnnnnnnnncagcgccgccgtcgcccgtgggcagc
agcagcaccgggcggcggtc
>Pgl_GLEAN_10032646 PgMYB57
ttaaacgaaaagcataacctactatttcttcctttgcaatccattacatggtcaaaacga
cccgtcaaatatgaagtacgtactttaccaatcataatgtaataagaccatagttttgcg
accatcccgttctattggcaactgaaatttaattcatgatgactatgccaaaaaaattcg
ccagaaagaaagggccatccacaaagtcagaccggtttctccttttactttagaaacggt
atggcaacacaagagaacaatgattacaaaaagaatttatgaaagaggtgcaggcataac
cagcactcttaaaatcgctattgttcacattatgagttaccacgtacacatagcttagta
gcatgcattgtctctactattaaataattatgcaaacaatcatctggaaaaggagggcta
gaagcagactcaaagttctatttaaatatattcagaaaaggtaaactcgttttgttttgg
ttataatgtcttcgttgcttatcagtaataagtgtatttgtttacctattatgtacctaa
ttgatgtcaacttaaaaaataattatgttatcaaccgttatgaattagttgcggtaaaat
attttgaatttagtacaatgttctaagaaatagctctaatataaccttaatgtataggca
tataatatagaaaattatgtagcaaataagctgataagatccacgcaactaccaattatg
cttcaacacatccaaataatctctccctcctcactctgtttgtctgcatctgtttctctt
cttcatggtccttcattcctgctctctgctcttctctcttctgccttgagtagttagttt
aacccctaattaccttcaataacaagatcacatcataaagttagtttgagtagagaggat
gaatacggcatggtatgtttagttgcggtggtgaaattttttgtcctctttcaagattta
ttaggagtactccatctgatttggtaaatgaaatcgttttggacaaggtttgagtcaacc
atcgaaaatataaatcatgaataacttttaagttgttgagtttggaaatgtgaaaactat
ttgaatagatttgtcttccaaagtacttttcataaaatatatatatgttagtttttaata
atatttttataagaataagagaccaaagttgtactttggaaaccttgtcgctgtcctaca
actacaactacaacaacttagccttttgtcccaagcaagttggggtaggctagagatgaa
acccacaagaaacaaagaaaggagaagcacgaagcacaaaagcacgagacttcaaaacct
tgtcgctgtcctaaacgactttatttaccaaaacggacggagtattaaacgtagactaag
tacaaaaataattacacaaaaattgcgagacgaatccattaagcctaattaatctgtcat
tagagattgattattagagcacgccgttgtctaatcatgattagacaatgtcgtgctaca
ttaaccaatatctaatgatgaattaattagacttaatgaatttgtctcgtcatctgtgta
attagttttgtaatcaatctacattttgtactcttaatagactttgaaaaagtgcgaact
gatcatgcgaacataacctgtttcataaaataaaaacagagccgaagtaaaaggaaaaaa
tagttttgagtgcagacaaagctttgatgaatcatccatcaaccgtcgtcaaccaacgag
acgtcaatggcagccagttttaccccggtgcgcgaccgggatgaggatgacgacgggcat
ggcagcctcagagacgggctcacacgtacgacgcgcctcgccctcgcctcccgccacgtg
gagcgccgcccccgcgggcggcttccccttccgcccctgccctctataaatgcgagcctg
gcgcccgccgagcttacctggaacagagacagcagccaccgtcacagagcgcgcagcacc
tgactgaggaagagggaggg
>Pgl_GLEAN_10018078 PgMYB67
ggtgtttgtccacatgcagctgtgcccaagtcaatttgccaacaaatatagttttgcaca
gcccctactagtttatagctgtcggctaatgttgagaaagaattgttttgatcttttcct
tgtaagcgaatcgccgtgtttgatgctgaggcggagaaggggagggggattaggacaccc
cttgaattgagatcacatggaattgtcctctcttgtaggacatggttgcgtattaaagta
ggacagagatatcaagcatgataggaccctccctcatgacatattatcagctacctctaa
tttctttccaaggggataccaaattctgctaatatatgtctctcttgtgggggtaaacta
tagctacgccctggatcatgcctctttgttttcggttcgcgtgccgctcgcgcggagctt
gagtgcatgttggctcgttttgatttcaatttttcagagaaagtgtagttgccaggtata
tacacttgttgaagcttactgtaccagtctagtggtggcaactgtcaatgtggcctgatc
tgtaatgtttttgaatgtacagttggtaaggagactattagagtaatctcatttgattca
acttggttaagcttcagaggattctaataatttatgctattctgcagggataagcctatg
gtaattgtggatcattaatgtcagcagtgtaacaacacacagaacctccaaatttaaata
ttgaacttcaccatgtagcagagttggcatcggttcatctgtcgttgtagggaaggtctt
ttctttttcctaagtgaggaactttaaagggacaagagaaaagtagtgcctgcacttaga
tttgaaaacaacgtaactactgccaggaaaggacaagaacatcaagaattcattatgtat
atataagttgtcagagtgaaggcattagttatgctggaattgagaatcatatcatcactc
accagtactcaagccaagttctcgaaacagacctgtgaaaaggacacaggttcatgcgct
atatgaaattatgaacacacaaaaacgcgcaaaccgacctaattaggatccccgaacaag
ccattctgccaactcaattgttctgacattgggtgaaaacagcactgcgtttggcatcca
agcttccccatccttgtcggtatgtacttccagaggtcattgtttatgcatatacccaag
gtgcatttcaccatcttgatccttgcaacgcaaatccttctggatcccaactaggctgtc
gtttctttgtggccatggctcttcagttcatccttggcctcgtcaagacagatgcctccc
aatgattgccatcagaagagggatgtattagtcagtcgggtcctgtcattgccaatccaa
agtgtccgttcattgcaagaacagctcatgtcaatgctctccactcatcattggtggaga
cagtctgaccttcatcacgctgattattggataacggcgttctttacttgaaaagaagaa
tggagttattacctgaccactgcatctgaaactaggacttctggttacagtctctgtatc
tgaactgctgcgccagtaattaaagctcagataactccaaaccgagtgaccgatattggc
accagttacagcagcaatgctgtaacagaacaatatgtgatcctagtgccagcaagcatt
catatttcaaatcatcattagaacgaagccaaagtttagtgaggcactctgagaatcttt
ccttgtgtaatggcgagatagaggtgacatcctctgaccaagctcccccccctcataatc
tcgagcatgtgcaggccgcaacctactcaattcccctcaattaaactaaaccgagaagca
aaatgtgacagccctttaaatcacaaggggcacatggtgccggggggactgctactactg
caacagctcatcttcagagacacaagaagcgcaggaacaagcctgaaggaaggaagacga
cggcggcgacggtggcggca
>Pgl_GLEAN_10021657 PgMYB43
tcacaacttcaatagccaaacaaccaactctctgcccaactctctggccagcttctctga
aaactcactctcacagagttaatcacatggtgaagcagccaaaacatggctttctccccc
gctcatgaagttgctcatggagttgtttttttaaaaacagctccacaagtgaagctgagc
tgtgccaaacgggtcctaagtgaaaattttccaaaatccctttcgatcctcttccatcca
cttgaatcctccatttcccaaacaagcccgcagggatctttgtgcaacatacggggggtg
gggggctatagacaaaattttcggcttcgctcgtcgtcggctcgcaagatttgactgcgc
attcgacacttccacctgcttcagctaatcgtcacgctctgaaactctaatatgcacatc
tgatgtcaggggcatctgattttgcaactgacgcgcgtcttcctctaactatccaaagca
ttggcgtgagaaatggttggaagatactccttgaagcagagcgaaggaactgctctgtcg
gaaaatgcatgaaaaacagtaatggccagatgctaacaagcttgtggtttccgcgtttga
gctctgttcttgatgaccactgttgtatctctggtatatacctgtcattaatgccagcaa
ggttggatggctagcattctttccctgatggggatggtttgcaattggaatggagccgtg
cttgagattactctgacgacctggaattgcaactcaataaagattgccactgatgcttcc
tgttcagtaaatgtttgattgccaatagaggttgaattaaacaagcaatcatttaaaaag
atcagtggaactttatacgaactttttccctagagcacagttgatgggaattttaatggc
ggataagaatacatacatcgtcgatgaggaactatccaaatagattcgtttttcttcagt
tccagatcgatttggaatttctttgtaggcaagcgtcgtgactttgttacctctttttgt
ttggctttggtgaaccttacgtgacaatatttaaacacgaggtgcagcactggacaggaa
aaaaaaagaaaagctgctttcatgcatgtagtcatggacgagtagaaagttgtcactact
tcggttcaattcgagaatctctacgttttcggcaacctacaaaggtagcaaaaaattctt
aatctctcgactttcgtaggtttccatctcaccgcactctttctgtacccacctagacca
ttttcagactgaaagatcaataccacgatctcattttcttggaaatggtttaattgcttt
tcaaggcttgaaaccatcttatttgcaagcaccagttcaccatgtatgtagatacagggg
ccaggttgataagcgtaaaaaaagtggttttaaacacttctgtctttggaagttgtctca
aacacttgaaatatagcaaaagtgcaaaaccatttagatcaactgggattcacgctactc
agcaggaggggatctatccccacatttcttgatcacatcctgacctggcagtagaacaca
catgtaggtcattcctacatcaaacgtaacatctgaatgacattcctctgcaggattgtc
tttcagaaaacattcatatctaaagactgcaacctcaacatgggctgtaaaaattccatt
ccttttactcttacctttcgtttcacccctttctttttcccttcctgagaataaggaatc
gttggatataatacaagacaaagtaataaaacgacaaagaaaggaagagatataaccgtg
cagtaaaccattagagagattatcacgcattaggtgttttacagtaccaggggctatccc
actataaatggagggcactgtactcgtttgaattcatgtgcccctttgggaggcagagga
aaaatctcctatccaatagagaaagaatttagtacaaaacaaaaaagaggaagagtttag
tacccaaaaaaagaggggag
>Pgl_GLEAN_10013171 PgMYB33
tttatatagcgtagtgtgacaggggcccgccaaccattagggttgggcgcccccgatcag
ggcgcgagactaaggggcctagtgggccgttgggcccactgatgagatcattctaacagg
acccacatgtcagtggtggtggagaagataagagaaatggcaaaacagtccggttggaga
tggaaaatgagataggaaatcccgaaattcttagaaagtattgaaaatctggtaccccca
ccgtcccgaaatataaggttttggagagttcaaactcaaaaaagaacatcaaataacttc
acccctcattttacactaccaaccaactttttcacatactcaccaaccttattcaatttt
atcgtatcatttcaaaatcttatattttgacataaatttgaaccctcagatcctatattt
tggttagggagcagaagaattcaggtgcctcgggattatgtctgcggctggccgtcccca
aggcccagtccggggtttctttcttcacccctttcttcttcccagcgtcgtccccgaccc
ctcgccgtccccaatcgcgcgccgccgctgcattccgtaggtcgcgccgctcgcccccgc
accgccctnnnnnnnnnnnnnnnnnnnnnnnnnnnnncatcggatatcctcccctgcccg
gccggcggcgcggctcgcctctgccgcctgccaacccgccacctccaccggtatgccgtc
gcctccggccctccctctacatccggagatcattggaaacccaaccccagcaacccaaag
cccccaaccccgaacccgaacccgaaccctaccggcggcgagctctgaagcccccgcgcc
gccctccaccaccgtctccggaggctcccgtcgccgcactaatctgaggtagaagcagaa
ggaagcgcggggttgcacggatgaggaaggagggtctgacactacctccacgacaactgc
cttcgcctgcatcgagcaagcagtagccatgccgctgctgcgcaagttcaacgcaaccgc
gaggtcggcgtggcgtcgttgctggcgcccacaacacagctgctcgatctgtgtcgtcgg
cacctcccccatcggtgggagcacaaaattacagaacaggtccatcggtgagtatagatg
cagtacttctctgtaaaccagcgaaatcaatacttggacgccaaactcatttatcaattt
agcattgtacttgcaatatatcaattacgtggcacacaaatccttttgtttactcaaata
ttgaaatgcacttttagttcagcatgaagctacaaagttatgtagtgcagatccataatc
cttaagccaagccatgactgaactttgctgctctcggatttatgctatttatatcttgat
agaagcatgtcttcacgggtttattgaaactctgaaacaagtgtctgcgcgcatataaaa
tccaggagtactgcagcttctacaaacatacattttctgattcaattgaccctccattgt
tgtgtgctatttagctcaaaacgtgataggtatcggattcattgttcaatttatttcgga
ctatttgtttatctaaggaatgtaacatccaaacatacaagttacagattgtaaaacaag
atcaaagctgcatggaaattatttgggttgtaccttatgttgtgtctgaattgcattcgc
tcgatgtaatatctgcagcggaaagatgtgtgtatgccaagtttgagatttaatgccact
ttattaccccttccatggaatacaagaagtcgtttaccattagtgatagtaaataaggtc
attaactagcaataagtaacaaaatattaagtttcattaagttgttgtgttgaagggaac
aagtcttgtctagtctaggactctatatatatagcacgacactctgaacaatttctctat
gtgagatgcaggtagatagttaggaaaactgcggctcaatctctcttttcttcccaactt
acatagcttctgaaatcccc
>Pgl_GLEAN_10031141 PgMYB42
ttagctatatgcactcatttgcttcaaatacatctccattgttctcactgggattgcagc
tccacccttaagacttacttgaacatgttaataagaaaacattgcattatagtggtcagt
ggcgtagccacctcctaccgcgtcaagtctcgtggagtcccctactatttttggagcaaa
caatgaaggatgaggagctggaggtagaagaagaatgggaagagccccctagggctcaat
cctggcttcgccactgacaatggtgtgttccaaagcatcccttttcattctttctttttt
ttgcgaaaaacatcccttttctgtcaacagagttgcaatgctaattttaggctattgtcc
tctacatatcgatgttgcataacaaacttgacttgattaaaccgtacctttcacatacac
aaataaatcaaaacagtggcagagcgtcgtcgggccttggccatcactatcaaccaaact
atgtaaaaccctcgtgcgtttttgtgggaatttctaaaaaaataaggatgattgcatcaa
aactaacggaattaagataattgcagactcaccgatctccactggtcgctctcgtcacca
tggtaccgacatctttagcttcgctctgctccaagcctccccgcacggggggcagcgtct
ctggcgcgacgactcaaaggacaggcagatacacggcctccccgacgctgggagtagcga
caagtcggtccggcgtggcagcatctgggtgtgggcgcgacctccccgacgtggtgtcgc
ggggagcagcggcccgnnnnnnnnnnnnnnnnnnnnnnnnnnnnnnnnnnnnnnnnnnnn
nnnnnnnnnnnnnnnnnnnnnnnnnnnnnnnnnnnnnnnnnnnnnnnnnnnnnnnnnnnn
nnnnnnnnnnnngacagcccagcctccgccgccccgtccctccctcccctgcttttccgg
ctggttgtggcccgccggatctctgcgggtgcacgtcctctgatggcggcggcgtcaacg
cagggagtgggatgcctacggcgctggcgcggtcttcagcgctaccagtaattagggagg
cagtgggtggggaggcaaggcgggtggcgcagtgggaacctgagggggcggcggcggacg
cactacggcgctcgtgggggaggcaaatgggctgcgacgcgggatcgggagacgcggggg
ttgggtgggggcggcggcaacgcacggtgggagcccatagggaatgtgttttaattactt
ccaggattgttactgggtacccaaaatatagttgtctacaatgtcaatgtccaattagct
attgttcattgactttagagctaattactattaggagctcaaattcccccagtgaacgca
aaggggactgggtagtgtatttggaaccatttcattacaaatttactgtcaaggattttt
gcccaccatatctttcgccctctcctcacatcccacacccactacacctccttctcccgc
ccctcctctcctagagccctagcatggcaggtagaccgtagatgacgctaccatgcacca
tccaatccctaatcattctcctccgatccccacaccatatctgtttcggcgcaccccgct
cacctccatctccccgccagtccaatcctcgcccccacacatagaccaaaaacgcaagca
ctgcaccgaaaaccccaggcatcagatgctccaatctatgcagtccatatatagccccct
tttggagagccaaaaggtgaaagtgccaacaaatatgaaaacgccaccgtagcccctcac
tgaactcgcctgcaaaaaccactcaaaccgaaaacgccagctcgccggcctccattttta
gcaacttttcccttaaatctccgctcttgcacaccctcttccccctcaggtccccccaca
gaggcacacagccgcgcgtgcctctgcctctcctccctctcctcgaaccttcttctccgg
cgccgccgaggcctccgccc
>Pgl_GLEAN_10004924 PgMYB49
gatggacaataactaataagctctggtctcgtccattaattagtcaaaaagtcaaatgcc
atgtgttgcgggaaaacagtaccacactacctagaatgttcattcccggccgcgcaaaca
gtaagtcatcacagatgaccaaaaaacataattgtgcagctaggtcaaccatgcatacac
aagcacgcatgcatggactattttaacaaattaaaaatttttgttggttaatcagaagca
gggcagggcaagggcagggccccaacttgcattggcaagaaaaggccagttgggccaatg
gcgagcacacaatccaggtgggccccacggggaggtaggggtgggcccggcggcctccaa
acccctaaccgttgtgtgtcatgcatgtccgcggatcaaagtgagattaccaactaaaat
agcgttggcgtgcgtgtgacacacacaattgtttgctttattgttatttgacaggggagg
aaggggaacaggtagttccttgttgtgtgctccttgttagcaggctgcactgcacatacg
tgtcagtccacacgaacctaactctcctctgccccctgtccacgtacgtgccgtctctag
cttccatctatcccatcgatccctaatcaccaaatgtgtgtgtgctatatataatataat
ataattaatatgaccattaaattaaacttattgtatagtatactgtatttggcgtgtcta
tataatactagctactgtatatatgatgaatcatctcagtttagttaatgcatgtgtagt
agtctacatggtagcatgcattatgtgatttttttttgctctgttgttcaagtaacaagt
caccctcatggacactaattaacctagtagatactacgtctttgcactccgatgatatgg
gatacggctaatatatagggagtatgtagtaggacacaaattaagaaacaaaattagttt
ttctcgatctttaacatcgacgacgattagctttcacgtctacatacagtgagtcagtgc
gtgaccatgcactagtgtacgtacgtagcttgtgctagtgcatagtacacgtcaccgtat
attcatgcagttattcacatcactatcagatgccatctggtgcaatgcatgcatgcatgt
atgaatacatacatatacgtagaggggagatggcatctcacacaatatactacattattt
attatagtacgactagctaacaatttgtgcatgcatcgatgcatgggaagcttctagttt
agtttcgttcggatcgtcgagtagcacagtatagaaatattaaggctgttgatgcctacg
tagagcatgatatagatggtgaggcaatgattaatataaaatataataattaatggcgta
cggaccatcacaaacactagaaaacacacagccagcggcaaatctaactaaacaagatgg
ttaagcaaagctaattgctgccctagctaggccgggccagcagtaggcattaacaactca
ccctgcatgcatcgcatatactggctccatgatccatcttaacgacgacgtctcattagt
agactaattgagctacatgcatagcttaattaccttgcttctctcaagtcagcactcacg
catatgaggagagagaaactaaagcagccagaggctagagagagatagagagaggaagct
gcgtctcccacacacaaagacttgctttttggggcggccgggacctcagcagcagctcat
gccgccatggactccgttgccatgcaccacgccaccacctaataaacctctataaaaccc
ccctggccctgctgctatccactccaacggatcccacatccaggccaaccaaacctcctc
tgctagcagcggctttgcttccttcccttatctttgctgctttgctaaaaggaagaggaa
aaaaactcactcatcgtcgtcttcctctctccaagcctagatcgagctagcaagcttatc
tgtctgcaacgtacttaaca
>Pgl_GLEAN_10023193 PgMYB53
gtgggcggcatcgtgcagggtgcgcaccggggcttgcatatgcgcccggtgcgcacccaa
ttttttcccaccaatggagccgaccacaccctccacaggtcgcagcacctgccccggacc
agcacacacgaccctaccggctcgcactcgtaaccctccaccacccctccgtcttcctct
tcctccaaccactgtggcgccagtggccggataagctagaccgccagatggaagtacgac
aattcgtcggccgcatcgcgttggcgcagagggcgctcggggcggtgggatcactgctca
tccctgtcttgcggatcaccaacggcctggcgatgatctcgctcatctgcctctgtagcg
gcaggaacacccgctccgcttcccgctcagcggccgcgagtttgccactgtgctctgcaa
gcgcgcctccgtcctgtacctcctcacctctttggcagcccctcctccgggcagcccaga
gtcctcgccagcaacgacgaggagagcggctccacgcaccgggannnnnnnnnnnnnnnn
nnnnnnnnnnnnnnnncgctcgcgcccatgcatgtcagcgtggatggcggggacgaggag
atcgtcaccgccatggtgtccggggtgttgccgtcgcaccacctggagtcacgccttggg
actgcagccgtgcggccatgctgcggcgggaggcgctccagtggatcacggggcggggtg
tcgaggggccccgctcgatagaatggactaccagaccatcctcgggcaatgttgcgagat
gcccatcgggtacgtgtaggtcccggtgggggtcgacggcccgctgctcctaaacggggc
cagtaccatgtccccatagctaccatcgagggataaatcatggccagtgtcaaccgcaag
tgcagggccatcgtggtgtctggtggcgttgtcagtgcgctgctcagggatgccatgtcc
cgcgcgctagtcatcaagctgccatcggccaagagggcagcggagctcaagtcgttcatt
gaggtagctgccaattttgagaatatggcttctatcttcaataagtaggcggccttctgc
tcttttgtattcttctgaccttctgtctttaaaatgaaatctttaagttttttagagatt
atgattgtaaaatgaaatctttgttattttaaagtttttaacagatctgttttgagaata
actaaatcaatttagtgggagcccatcaagtatatgggttcatttatcacagtatgggtt
gaaacgacatagcacgtgtgtcgcacgtgcgtgtcgcacgtgttgtgttactagtattta
ataaaacgagagcagaagatctgagagcaatatttttttgagaattacacagtacaacgc
atacactcacaacacacaaccctacccctatgagcacctccgaaggactgagcaccggca
gatctggagattcccgaagtcaccaatggcgcctcgtcgtcgacgggaacgtcgcttacc
acttaacgcataacatcgataaatcctggaaaatcctggaaaatgtgcgagcaccaggat
ttaaactcgggcgggtagcatctcactggatcgtcctactattggactacaagcccaatc
gcaaatccgagagcaatagtaaatagagtccataataaaaatatgataatttcttgtgat
agtctttggacatataaactctaggaatagagtctgggttgagatatatcaccctaaact
tttcacaactcgaagttatgggcgtgagttactccaacagattgattttacatttccgtg
atccatctccctgccatgttgggcctacctgtcagctgaccatcctcttccagcagggca
cggagccttgatgcagggcctcaactcggccacgtatcgccagtgctacagactcactgc
agacagagcgatcgcgcgcgcgcataaatacgccgtcggagctagacaacaacgcgccct
gctagatcggggagggaggg
>Pgl_GLEAN_10028194 PgMYB55
ggtcttcagggcagtactatgaacctatatcaaagacaatatggtccttttccttctcta
tttttctattaccatgaagtgtcaaatgatttgtatttgttaggtagcatacataagcaa
tggtcattatagaatagcatgggtggaacctgtaagaaaagtagttggtgatagtttgaa
gccgccgcccactgaggaccaaaacccatgacatatgacgaatctttatcttctgctgta
agctaagttcatgattcatcagttacatgatgaccttagagtgcatattgtggtcaagtt
aataaatcaggatctggacgacgagcaaggagtacaatgtgttcctgtaaccaataaaat
gatctatgtgcaaaatatatatctttttaaactttgtagtttgatgtcatgtattacaga
tttacagttgatattatatttgtatgaagagcttaaccaaagataaagaaagtacaaatc
agattgtcaaatggaatgagatcgtaaaacctaataggatcaatcaattctgctaattta
acaatgcaacacacaaccaaataagacctatcaaaataaactacttgatttgatgataac
aatccttcaggcacaactttgtccaaaggccacatttggggtccaaaatccgtaggcttt
agtttaaatttgaaccaaaccccaaaattcttcagcgcttcccccagctccataaaagtt
tacgaaaggtctagcacactataggccaattaaaacaatcagctaagctaagcaaatcat
gaacctactggacaatgtggcaagtagaaaagggcacatcatagaaaaacaaattgaaga
tatctattctgggttctacattagtttatagacctgtacaatgtgataggaggaatgcag
aaatgagatggccttcagaaatgagatgaacttgcacttccaaagcacgtggaatgatgg
gcaatgcatggtacattattaatccaagggtacctgggctcagagctatacgatgatgaa
gcaagtgaacacagttcagcggttgagatatttgctttttcgtcagttattttgttcatt
ggagtggggcaaccaatatgtgtgccactcttgtttaaactcatgtcgcacagttctgtg
cttgactgcttgctctccctgcagttcttggaactcagaacaaaaatctgacatgacaag
ggcctcaccatgcttcaaaacttgatgtagttcagcaaataagttccactgtttctcgag
tttgatatcctgccacaactgcaactgttaataagatggaatacatttagttctactgga
caatatggatgaagtctacaccatgctttgcctagtgagcaaagtgtcttagttgttaga
ttccttccactgaacatgggtcctgcacttggttttttctgatctctttttacattttca
acacaccatattatcaattaggaaacatagaggaagcttagaaatcaagaatgcaaagtt
tcaaaaaaaaaatcttccggaactgctgttagctatcttattccaaaagagtcaatcaca
acattacaaaccagaaaacaactagaaatacaagacaagtacgttaaaagaagcaggtga
ggtttatgtcgcatcacagtgtggtcttacctcgctcacctaaataatcagcaccctaaa
gttctcttatcaagtcaacagaatcaatggccatatgttttaatatgagcacagccaaga
cccttgtccctttccaaaaaccatgcacatgcaattttgcaaggtgaaaaggacatatca
gagttctcttctcaatgaatttggttcagcctgtcaatgttcccctttggaaacagggaa
gaagcctttatatataggtgagctatgctctggtacccagccatctggaatacaacatac
ccactgcccacacatcaagggggaggcagatcctctctcgccaccttctggcatttgtca
tatcctgttcttaaccatca
>Pgl_GLEAN_10022854 PgMYB34
atattattgtaaacttcgaatggaaaactgaatatatggaacgttctatttatctgactg
taatcaaaggaacatcatgctatttataaaagctattaagagctactccatccatcccaa
attaattatcactgttgattttttatcacaatatttgaacatttgtcttattcaaaaatt
agtgcaaatatggaaaacgtcaaactatacttaaaatacctttgatgatgaagtaaatca
caaacaaaacaaatgatggatacacaattttttgaataagacgaatggttagatgttgtg
atcaaatatcattcgcgacaagtaatttgagacgcagggagtaatatacatgcaaatcct
caaaaaggagctaattcagtaaagtgcccataccatataccaggttcaaattttgttacg
cttgaatgggaacacaaacgtgttaagaatgcaatacattggccttccaaatctaacctc
acatcacagcgatgagaatggaaattttaggaaattactttcagataacaacatgatgtg
ttttgaaatcagagacctgcataaccaccagcatgatgggaaagaggaaaataaagcaca
gcatacctaaagaacctataagattttcaaataaatttcactcagctactaggacttacc
tacaataacaacctacaatttgcataaagaacacacctaaaatggaggggggaaaagtgt
cgtcgacccagtttcaggataggctgatagcacatgcttcattgtataatatagacccaa
aaaggagccaaaaagataaccacgatgaaaacgagcccacatcaccacaccatgagtcat
cgacagtgactgaggggacaaaatggcaatcgttcacttattatgcaagcatatttcaaa
atacttggaaatcaagcaaattcgttgacttgtatgttccccaaaagtagagctcaattg
aggacgcataaaagaagccaaacatgtcaaaataatacttacagggttggtcagcatcca
tggaaagcttattattaggaaacaaatggccactgtaaatataggtcatcagctttccaa
ggagcgaatatgacatagtgcaggagtttcagaaggtgcaatcagaaggtcctatcatca
aatcaagtgctgcagttaacaccagcatgagaacttgcaacagtcgtatagctgaatatg
ataacaccgctattaaggatccgaaccatataaagcacgttttatctaataataaagggc
atcttgctgtccatcaaattaaatatgtgttcacttcatttttcccacaatgaaattatg
tatggtgttcatatttaaaccattccgtatgcaatcagtatgtaactctttattaggcgt
gtctttttcttaaacatctagcttcgttctttctttgcagcatgtgcctgagtgttttgc
acccaaattgttttatagtattgtggctcacaagaggattgcgtgtttgagaaaacaagt
acaatatatggtttttacactatcactggctactgtccacatatgtatgcacaagattag
cacacacagcccaaaaaacaatagaataagtaaacaggtgaaatatatgcaatgagatac
taaaatattatatttggtcatctaggcagatcagatcagataaacaaactacagagtcta
gggtgcacaaagaccaggtccaggaaaaggttacgcaaggactgctgatggctgcatgat
ggagattctaatccaagagaaacaacaattagaaagagagcagcccagatcacaccacca
ccgattaaacagtattttattactatcacgcagccacctttttccatgccaataatacac
ctctctagtcctcccttttcagcacataaacacacctcccagcccgtcagaatgactaac
caaatttaggctctaatcaacacttcttccacccctcacaagagagacccagagctcgaa
gggaggagaaagaaactgcc
>Pgl_GLEAN_10033575 PgMYB94
tgcatgtagcaaagccagcatagaaatacatattagaaaatcctcgatgcaaacagcaaa
ctgttgtagtgtttagacatttgggtttaacaattcaattttctattgcaattcctgatt
ctatatggtgttccaaagctgtgtgatgcgacttccagtctgctagtattgatgtatcaa
tatgctttagaaagcagcactagttaccacctgagctctgggatctcgtaagctacaatt
gtacccttgttccatttgctgcaaggtgaaggacacgagcaaacgactgacctgtgccat
cgcagcggaggacctcgcaggcggagcagccagcgacgacagcatccaaggccgaacccc
ctccgtcactggctgagactacctcccatgccgccctgaccgcctcccggaacggccagg
tgctcaccaccaccgggaacgccccgcccacttccgccacgtctccgccgtccaccgcct
gattgaaaccccaaaccccccaaaattccaaatccatcgtcaatgatgtagcaaacaaat
ccaaactgcagagaacgaatcgaatcgggttttcgcttaccaagcaccaatcgaatcgta
gcagcaggagccccacgagaagccgcacggagctccgccccatggaagccatggatacag
tggcggactggcggaggcgcttcgttggggactgtcccgcatgtcagtgggctggctggt
ggctacttccatgcgggacccatctgtcggtgagattcagcgcctgaataggcctcttgg
gtgtgccacacccgcagctgaccccgaaatgcgaaataccctagtagcggcgggcatgga
cgagcaaggcggcggcggcggcggcagcgcggcggcggagagatggccgtggnnnnnnnn
nnnnnnnnnnnnnnnnnnnnnnnnnnnnnnnnnnnnnnnnnnnnnnnnnnnnnnnnnnnn
nnnnnnnnnnnnnngcggggcaagggcggcacggcggtggcgatgccgttcagggcgttc
gccatcgcctccctcttcgtcggcgctggcgccaccggcatcttcgccggagtactagcc
gcgggcgtcggatcggtacttcacctactccaaaattccgctcgtgcgcgatgaacaacg
ctgcggttttgcagcacgaatctgcgctgatctggtgcgcccgcgatgctgtccgtgtct
gcaggtcgaggacatgaagggcgtcggcgcgagcatcaggaggtggatgggagctcctcc
tcgccgagtgggaggtgactgactagtgactagtacgccgttggatgaagaaatttcagt
cctcttagtataggaaactagaattctgggtggtgggtgtgatccggattgcttcacatt
tgagtggtttctgccacattctgaattggggtgtgcaaaggagtaataagatgaatgttg
ttactaataccttgtatcacaagcttattatattttgatcaaaagttgtcttctccttcg
ttcaatagagcactactgctttcctctctttgctgaattttctgaaatgcaaactgtctg
aaaccaatttctaccacatacagtaggtgactggaaagaccgatcacaaattcgtgacag
gatgccctgaattttgggcgcacgcgacaacaaaattacaaaatggctgcaagcacacga
cgtatccagcgaccagcggcgagtcggctagacagacacagagcatccttgggccgcagg
aatcggaggtcgtgggggtggaggagcggttaaccgcccgcgttcgtgcgctccctccgc
cgctgcctgcgccgcttcgggaatcaaacccgcccgtcggatcgctaccggacgctctcc
gtcgcgccacgtgcgccactcgctccccccgcctgccccagaggagaggccccataagga
gaacgggcacggcgacggcacagcgccttcccggaacagttccctgacgagagaagagat
cgtgctcctgcgttgaggca
>Pgl_GLEAN_10009766 PgMYB85
aggagagaaggagagtgtgttcttgcctattgagatttctcttcctcttcattgaggtgt
tctttcttagtgagcaagagtttcaaggtgcatccatggcttagctgggtgctcaggtca
agtgaaggtttgcgggcttgttactcttggagtttgacggctcctagacggtctaggtga
cttgggggttcttggtgagttcttggagattgtgggagcctcaagacaagcttggtgtac
acggttcgagacccaccattctggagatggagaacgggtactcttagtgagcacttgtac
tcttagggagcgatactctaagtgagtgctccaacgtggattagggggaagcgtcaactt
ctcgataccacgggaaaaaatccggtcacctcttgtccatcttatttacttctagcactt
acagcatttcaattccgctctcaagtttctttttctttgttctagcttgtttcacttgtg
tgcttcatatcttgcctagtttgtcatattgactcctgtgtgatatttgctaaggaaact
tgtgatagtgtgctctagaagtagggaagaacctttttagtatgggaaacactagttaat
agggttaaggttttcatttttcttagagcttgcaaaacaactcccatattcaaccccttt
ctatgtgactagatccaacaatgaggcctttgtagagaaatcaggaaagtgaattcttag
atatttcatttgatatgcatgtcttatggtgttggaacttggaaacggaacgggtctaac
tcaagagagaagtgttcgagaatattacttgtgttgatttagtctagcatgtatgatttc
accttgaaccgaccacgttacttcacaagtctgatgtctgaaatacaaacatcacattaa
cttctgtgacaatatgcatgattacagttagtcttggaataacatgtttcatgcctgcaa
gaaaccaacctcttgtgcttacatgcatcaacatcaaaagtttacatcatattaattgag
atccatatttaaataggaatagaataaggaaaatctctagaacttgcatctgctttttct
gatcaagtgcctatgtaggatgaaaatagagtatgacaagtactgacagcttgagaagac
tcaggaagcctcacataggactctggcgcctcgtcatctgcactaacagtgaaacagagg
agacagattatatcagctcaggcaccatgaaaagtatagcttcccaactcaaactatcac
aagtagtagcatactagcattacggccattgcctgaggggaggtccctcttgctgctatg
aacacagtcgccattgttcgtcttgccatcgttcggtgctgtagttcccattgccgttgg
caccctttcacctcctctgtttcccattccataggcacgataaatcttttgcaaactcat
acacgtacacagattgaagcgacgagcagtgctcggggcctgatctgcgatccaggggtt
ccaaaaccgaattcgcggcgtcgatgtcgtgagcaacatcatgaccaactcgtgaaaatt
ttaaacctctcaacgtcgttaaaccactggctagccccagtagaatatagagattagacg
taagctgttgatttgccggagggatgcagttacgcacgcgccctattatactgccactgc
cactaaaaagaatcatttgtgcgtgattgacactaaccaatgccatcgccgccaccggtt
tgttaaacgacgggggcagggggtcacgccacggtcatgcgcctccacctccctccagca
tgttgttaccgtgcctgcagcagcagaagcaggcacagcgcaggcaggcttcttcgtcca
tcagggtctctgctgtctatatctactggtatcacctttttctgcggtggtgacggcatc
agatagctagacctcttgatgcgtcgtcgtcgttgctgatcagcagcacagggagcgtgt
gagcagagggaacaacggcg
>Pgl_GLEAN_10029303 PgMYB78
gctgggaacgggcctggtgactcgggtggcccggccgccggccggnnnnnnnnnnnnnnn
nnnnnnnnnnnnnnnnnnnnnnnnnnnnnnnnnnnnnnnnnnnnnnnnnnnnnnnnnnnn
nnnnnnnnnnnnnnnnnnnnnnnnnnnnnnnnnnnnnnngtgacggacgcgcccgcgccg
cgcgctcgcgcacgggagaggagaggacacccgcagcatcctcctcgtgcggctcggacc
gggggaaaacgctcgatttcccgtgatctcgtggacgcttcgcccacccgcccgcgttcg
tgacttcgtggaggtgggctggtggcagctggtgcgtgcgaacacgtaccggcgcacggc
tccgttcgctcgtcggcggttccgcttgcccccacccacctaaaacacggacacgggagc
cggcgccgaggacttaggggccgggggcgccgcgcgcttacgggcaccgccgcttaatgg
ggtggtggagcgcaccggcgcgggtacgtacacgccggagttggccagcgaacgaaaaca
gggaggattggggtgggcgcgcgacgtgccgagcccaacggtccgatttgaaaccgaggt
gctgcttgcggctccagccgtggggcgaaactactctatctggcatgcaattgcagagcg
ttgaaaactactcggccgggccgggctgcaatttgtgccttcttttggacttggtgcacg
cttgcgttgaatgcgtggcataggactcgccgtttgtgcgagggagtcgagtcctaggat
gctggataagctgatgttccacctcctgttacattcttggcttctgcctgaagcaactcg
accgatctctttccgctgtaaaggaaaggggaagggccgggaaggcaaagtcagataaat
actattttgctttttagaccctgccgcgcgcgctttctacgagcaaatgaggggggaagt
gcaaaagcgcgacgaagaggtgaaggataataatccaggaaatatgatgatgctggactc
agcggcgctacatagcatagccgagtacaggtgtcttcccgttttaatcacggtggatgc
cgatttcaccgtttgatatgggcgcgtagtagctgccagtcgtgcagaaagcgacccacg
tccagtatggagaaaattttagccgagggaagaaagtgacggcggcctccggagtcgtcg
tcgtcatcgtcacaggctcacaggcgcacccaaagagcgctccttcctcctctgcccccc
cgcgcgcccgggcgcgtcgtctccagctgcgacgtcacctctgctcgcaaaattttccaa
agccactgagtgtagtagcggccagtgcttacttattccgcacttcgaacaaaggccgtc
atctcgcagcctggctagggttagtattggatcacttgagcggttcgtgcaagtgtaatc
gtgtgccgccggagccccgtgactagctagctacttccaatttcgcaaggccttcttgca
tcgcacgcttcaggcttgataatgcctcgatcggctagctgtgagagagtactgaaggcc
cgatgcagaaattcagagaacgttaattaattgattaattaaattgtcctaccaacgtct
cgatttgtttccgtaatgcgacaggcaagtaacaacgcgaggaaaatcttgctgtgatga
cagcgccttttgtttactattccgtaggccaaatgaaaaaaatggttggagagagagaga
gcagagcagagcagagcacgggggcgttgtgttgttgggcttcagcttcagggacacccc
ttccctttcgtgcctataaaaagtcctaccaactgcgcgtcctgttgacagaccccagag
cgctccattccgaaggcgtgtagccgaagccgccctcctcctgtagcggcagctagtctc
cctctagcctgctgagcctcctctctgctcgatcggagtcgcgcgagctcgtgcgcgcgc
ggtgggggcattctccggca
>Pgl_GLEAN_10002978 PgMYB69
taaatctggatggttacttccagccaaccttggaactggtgacaagacattgaaattgtt
aatttagctagtattattagtatatactggaattcctaatagacaatatgtgtagcattt
aatagctgaacaaagtttccaaggcagttaggtggtgcaagaagaaaacacgaaggtggg
aggcatggaacgaaggactgtgagaagatggtcaaaaccaaaacaaaagagagtatatgc
atgcatgaaccaaacaaataataatctgtagctgaaaactgaagatgcatgttggcagta
tatatactactatatgtacatgtggtgatcatccatccatgatggccatgccttcggtta
cagttacacaacacacaaattgtagataggtgtgtgtggtagagcatcaggtgacccagt
catccacgtttccgatcctttggtctttcagctacgtttgttgccactttcaacacgtga
ctctcttcctttgaaattgttgtaggcttcaccgtttcttgtttactgtttcctctctgc
ttcttctttcccctgcaggtacattctctgaacctttcgcttcgcttcaatctgttttct
tactatacgatccacacgaacgcgctgagtgacgcgaacaatcgatcgagacgagcatca
agccggcttctacgaccagatcgatcacgatagctttactgcagatccggcagtgtttcc
ctgtggtaacacgtagacacggtttcagaattcagacacgtacgcgtacaggtacagcat
gtacgcatatggatggacatggctagtgatgagctcattgcatcgcgtacgtacgtgttt
ggtagctttagtgcagtgcttagtaaaacaatactagaacacatctagtagctttagtcc
ggctacttgactctgctatggtcaatgcgctgtttgaaacagtaactggtgaggcaaacc
aatttcaaagctggtgccctcaaagtcttcggtgcatcatgggcagtccagcccatccga
catctgtgcccgcgcttagaataaccgaaaagggaagcttttcccagccggggcctgcag
ggtcgtcagggatgttaggtcctgaaagtctcaacttctgaaggctgctcatatgctccc
ggcatatagcttggacgctaaaggtcatcaggggatcgtagctgcatgcacacgcaacag
tgaaaacatggtggcctggtgtgctcagttcagcgacgttgtcaatggcggacttgttgt
tctctcggcgatagacaaatgtggggaaaaggtaggcgagggccagcgagaggggggacg
aaagcaggaggcgccgttcaaagaactctgtctcacgccaaacaagccggggatcggctg
cggatccaggctctgtatatgcttctgcattggttcaacatctgtaggctgtgtgcacaa
tttctcgctgaattgagacgttcagaggcttaatttggttcgtcttcactttgtaaaaaa
tgatttacacactaaataaactcagtaataagatgagccactgccagactgccacatagt
agagaggaggtctctcgccatttcagttcggcagcagcaagcaaaggtagcacacgctct
ggttgtaaacagaagatcctggcgagtgcatgggagggaggcccgttaatccctttccct
ttgcagagaccggtggtggaacaatgatacgctttggagtttgatgttgtggtgtggagc
cagccgtctcatcgaccgcaaggcaccagcatcactcccgtgtttttctccctcccgcgg
ctataaagctcggcaccaccttcctggcctcttccggactcgcaccctcggctcgggcac
tcacatcaccattcaccacctgcctgcctgcctgcctagctacacctccatatccgcctg
cctccgccgcctgccctgcctgactcgtcgtcagctctctcctctctccgatcgatctct
cctcagcgcagctcgctccc
>Pgl_GLEAN_10024409 PgMYB81
ttttgtatactctctcctagtacactacacgtctacactacactacactacactacacta
cactacactacactacactacactacactacactacactacactacactacactatatac
gcgaggcctgctttttttgagagagagaaaatgatggaacctgctccttgactccttgtg
catgggaaaaatgcaaagagcatagcagccatgcttagagatagccattgagaaggcctt
atcgacttcagtattgggttcctgaatcctgacactgggagtttctctgagagaccattc
aaatttcgttccgttcgtgttcttggaggaaaaaaaaatgttaggtccgcgcttgaaaga
attcaaaggggggaaggcacacggcagaacgaccatgtgtttcttttcacgttgactgtc
aaaagttgagatcgatcgataattccttgaggagttgaggagggggcacatggggtgtat
gcgcggatctgtttacaggggtggtcctgtggcgattgggcatggaaaccgcacaattaa
tggcttaaacgatctactgtttctatcatgatggcttaaactaggacagaattttttacg
gtcgccagtcccttctatagtctagaaaaaagagagagtattacttgaatttttgagcag
gcagttagactttcagagttggaaaaactgcaaccgccatccctcccacactgcatttgc
cttgtagttgtagcatcttccaagctgacgaccagagtactataaacgaagaaggtcact
gcagttggccaaggacgatacgcagcagacccgttttcgttttcacctgcaagtggcatt
ggcaagcggctgttgcctgattgcctcaccagtcaccacaataaactcccgccctgaaca
gagcatgcataccgccctgcagggtagggccattttaccctcacccagactgagcacagc
aggcgctgccacaccgcacagtaagctgaccaacatctcgattgcggcagatccgacgag
agagatgttggtccgccggcagccagccagttactggctgcttactgctgtggtctctgg
tctctggtatcgtcagtaagtatgaagctgctggcgccagatgcagtcaaacatccggat
tattggtaccgccccaagaaatttaaaacgctttgcttccagcaagagctcggatccgat
gctgatcgggagggacgacgactcactccgtcgtataggccgtagcgctgtggtacgcgc
gcaggagcacggcgagcctacgaccaggagacgacgggggatgtagtatgtacagtggcg
gcggaccaaacagtttaagcgcatgaatatacggcgcggcccggccgtcgcttccggtac
cgatgccacgtatacggtgccgcccggccgtgcgtgccccnnnnnnnnnnnnnnnnnnnn
nnnnnnnnnnnnnnnnnnnnnnnnnnnnnnnnnnnnnnnnnnnnnnnnnnnnnnnnnnnn
nnnnnnnnnnnnnnnnnnnnnnnnnnnnnnnnnnnnnnnnnnnnnnnnnnnnnnnnnnnn
nnnnnnnnnnnnnnnnnnnnnnnnnnnnnnnnnnnnnnnnnnnnnnnnnnnnnnnnnnnn
nnnncctagtatggaacagcgacggcccgcccggtcgttccgatctgggcggcggggatc
tgcctgcccgtcgcgtcgcgcctgacggctggggccaggcggccagcatcgggcgatgac
gaattgacgatggggcgcacggaaacccaagaagattctcatccaccaacgctgcaggtg
ctgctggctgggcacggccagtcagtcccgtactggggcggcacgtacgccagcagccgc
ccagagcgccctctactctatttatgccgctagctagcgacaccggccgggtcactcgga
cactggtagagagagcgtttgcactagtagctacagctccattcgccgctccgatccaag
gtccctgctggccggtggtg
>Pgl_GLEAN_10010553 PgMYB87
gatagagatagcaacgggggtactgactactggcaccaccatttactaaataaaacatac
tggtatgagctgatttcagaaaaaaaccagttgaacccaggacgcatgggctcgacggag
caaattcaatgtgaagcggcagcaggggatacgaatacgatacacgaaaatctgccgcgc
cagggccacagccacagtccacgccatcaacacatgtactaggggtctgggctggcggca
aacagtcaaggcgccacccccggaaacggcaaagggaaacctgctggctgcatcgctcgc
ggcatgcagccaggagcaaggaaagggctcgggaactgacggcaccgaaatcaatgagca
aaacaaaagcggtttcccctcaaagacgccacggccgggacgggatggcgatcaagtcac
gtcgtgcttcgtccatacagatgcggcaaagtcctgcagcagttccacccatccccgcgc
gagccgaccgctgtcgcagcagccgcaggaccagctagccagccaaggtaaacacgttgc
tgccgcaccttgcaagttggcgcgacggagggagagcggcgagcgcgttgcagcccccag
cgttctgtggctccaccaacgggccggggccaaaatcattgcgagggacgcgcgcgcgca
caggcaggccaccggctgtccccgcgggtgctcttgcggtgcattttctagcgtacgagt
aacgtaaccgtgccaggaacatgggatcgggacggcacgaaacgcccccgtagtacgcgt
gctttgatgggacgcactgtgtgctgcgtacgccgatcaaaggagacttcgcgtcatcgt
ctgacacagtgaagctcgcgcgcccgtgcgagattccgcttgcctgcgaccggaggggca
tggcatccccgccacctccggccgatcgcgcattcgcgcgccggtggagggggtagggcc
gtgcgcgtcgtgccggggtcgatcggcgatgggaacacgacacgccgtgcggcgtccacc
tcacgccgaggcggagccgccagtagccagcgagaggcagagagcgaacgagccccggga
atctggaccatcagagagggagagagtgtttaatgctcgccctctgatcgggtggatcgc
gattggcagcgacggttccgcgccgggccacgcgaggcgaaatccccggcgtgccctcct
gccgcgcggcgcggccccggcatgccgctgacatcgcgggtcccgnnnnnnnnnnnnnnn
nnnnnnnnnnnnnnnnnnnnnnnnnnnnnnnnnnnnnnnnnnnnnnnnnnnnnnnnnnnn
nnnnnnnnnnnnnnnnnnnnnnnnnnnnnnnnnnnnnnnnnnnnnnnnnnnnnnnnnnnn
nnnnnnnnnnnnnnnnnnnnnnnnnnnnnnnnnnnnnnnnnnnnnnnnnnnnnnnnnnnn
nnnnnnnnnnnnnnnnnnnnnnnnnnnnnnnnnnnnnnnnnnnnnnnnnnnnnnnnnnnn
nnnnnnnnnnnnnatcgcggcgcccgaagaagatatcgcgccccggcctcaatacaggcg
gacgccatcgccccgcccgcaccccgcccgacccctggcgttttccttcctctatttatg
ccgcacaccgacctcgacgcgcccaaagccaagctacacaacgcaacgcaacacacgccc
cagcgatcagcgcgtcgctttctcgctttggcaccctctgctctctgcaggcgctcactg
gcatctgctgctgtgctgagctcgtagtagtcactcacagtggcctgctgccaaaagggg
gggaggatcccggcagtcaattgccctgatccgggagggttattaaggggaaggggcgag
gagaggcgccgtgctcgggggagagagtggtttgaagcgcggcgtggtgagtgcgtgcgt
gggagagcaaaagcaacaagacgagccgagagcgaggagtgttcgtcggtgcagtgcgtt
ctcggggacgggtccgggcg
>Pgl_GLEAN_10008203 PgMYB74
tggtcgttgatcttcactgccgttgtcggattttctacaggattcggcactgtcagatta
taagtcgttttgaattgcgatttgaaaacgcggggggcttgtttggaactttgggacctc
accacccctcacggtcaactagactagagtaatgaatttgatggattcttgccaaaagca
tggagtggtattcaaatatattatgatcattgaagcagttataaattttataagttagtt
gcttaattaaattgacttgaaacactagctagtagtttgttttgttccacttgtttggac
agtgagtatacatggaaggagtgaaagacaaaatatgtgccatcatacataaacctgcag
atacccacaatctcactgacgcaccgagtggctgtcataaactcataacgcaaactgagc
cacagttagaatatcactcacatccattgcatttcttttaggaacaaatgccaatgtcct
caagacacatgtgactagcagcaaccttcaggaagactctaaaactacagaaacagtccg
agataataaatgttctgattgaaaacctagcacatccagaaaaccgtctcattcaacgtt
ctgaacactcggcgtcgcctgaaaactaatgtgaacttgtggagggtactagtattgatt
gagttgttttttcttacggtttgttccattgaaatggaattctaccaaaatgctgcaatc
acagtttttcgcaggtgagccattaaaccatgaacagtttttagaaaacttgtgtgctga
aatagtaatctagaggaagaacagttatgcatatatggatttattttcaagcaaacagac
ctgctagcttcatatataatactgctatgggagaacacttccatttgattagggtatcac
ctaaacagggtatcagtatcacgctttattttgaatgttctactcaaatacacgttagag
actcaactgctcgaaaaagaaaaaggaaaaacagaagaaaaatggagttagatagccaca
ggtaccacgagatcatgcggcgtgacatttcagccaaatgttgcccagatcttttcgagt
tgatgagcacccttctgagttaaccagacctgaacttacatacatgttacagccgtggca
acattattgaggctaacattagacggttgatgttacgtgatatacaggcctcaccattcc
atgaactgacctttctctatccttcttaattaatatttcttagataaaggaacaatgtaa
aaaatattaattaagaaaggatagagataatatgtaccttatactagtggatcccaagtt
cagattaacatatgtacctgatgcctatcagaatcagattagtggtagagataatatgaa
ctcattttgactactgaaaaaggcactggatttcaaattaacaaatagagctccaaatac
aaatagcaaaggatatacttgaatatacagtgcaatccatccggtacagaaaagggcaag
cttttcaaaaaattctcaactactccaaactccacaccaatttcttttgcaagcattagc
agcttaagattatccgtagactttagctcgtacacgtgtaggatcaccaggcctgatcac
cccagaaaatgaagggcatgtcctgattaacaacagtccgtaggccctcagctgagcaat
ctgagccacgaactcatcactgtctcacaaagctcacggtccacagggcgttgctttcct
gggacaggggtttggtaagcgcattcttacaggtagaagaggcaggggcgggcaactgct
gggtctgggtctgtctgcacgtcacctgtcactgccggaggagagcgctagctgctgccc
acctcagccgcgcgcacatatataccaccaccctgcccctccccgagccgtgctctgctc
actgctctctgcatcatccagccagaaccccggtgagctgtgacagctccggcgaacacg
tactacagggagagatcggc
>Pgl_GLEAN_10023805 PgMYB98
ttccgtggatgcagcggcgcagatgtacgcacgtcacggccgagactgcgaatggatttc
tcaattatacagacttttttgttgtcaaaataaaaattatacagactttttgtctcgaga
gacgaaagcagagacatataatcatatataattgacttgcatattctttttgtatttgat
tttaaacttgcttgcatactcaacacttcaacagtcggcatcatggaatggacactcggg
acggaaggttcctcacttcttcgtatttagggctgctaatgcacatcctacctgtggtgc
taatcatggcctacgtatactaatcttgtttgtttgtgcagtgcatgcattatatgagac
tatattttgtcagcctatgaatgaaaacgtgaagctaggcaaataataaacttgttctat
atcatactacgcgaccacgccgtgcatattcaaaacagtaggtttccttaacggacgtac
tggtggtttaacagggaaatttggccactttgtcgtctcaaacctgtatgttaatttaca
atttcaggatatctctacctccggatcgtggaccgtcttgaggtttgatcacttaatcag
gcctaaatatacatgaactgtagctaccaatatttttcaaataaacatagataataacaa
aacttcatgatgaaatacttgtggttatctgaggtaatgtataattaagcggcaatgttt
tcttgactttctcccacttttcataaaaaattatcgttgtgtgtgtggtcatacatgaca
taatttgatactgtttgaaacggcttaaattcaatttatggtcaaaatttaatgaaacca
gaagccaaatgatatgcttttttttcagttttttccgttcgtgcttatccgcactaccct
tcatttgtactaaaacatggaagcaggtttcattcccgcttctcaaataagtgctatttt
catatctatacagcttatctgagaattgttttttgtgatagcagttccaaacaggatcaa
tactttgtttcttctttattttagtatttagtatccaaaggcaaccacatagtgagggag
gtttataataaattagtgttttcgtgaaatgacttttagcctaaaggctagagtagtagg
ttgggtggaaacaaattaaacagatgttggaagaaaaagttataaaaaatagttaagggc
tccccttctgtaatttttttaatgtttacgtgaagcattatttgaaacaatgctagacaa
cggcactttgggagatttttgttaaaatagtgtgtgcgtgtagaaaagtctccgggttct
ccatatgttagtttttcttcgcaactaatgacagggcatacgggtcgttagtcgttagtg
atgattaacgaccgtcaaatcagtggtaggatgctgtgacaaaattccaaaatttgattc
atcttctgaccatcatcggattactgtaaaaatctccagaatatagtacgactaaacgta
tagtagtatagtaagaaaagagacacgccaactatatatgaaatgaatgctccacgtacg
tacgtgttgttgtatacgccagccacacggtaaagccatgcctaccatgtacaacatgag
gccaagtgtgaaccacagcatgctcgaatatatcgatctcttacgtggtgaggatctctg
gagcaactactctctttgacttgctaagatccacagacgaagcaacaacgacgggcaaat
aaaaacagtttctttcataacctccacaaagctctctctgctctctgctccgtgtatgtg
ctgccaacttgccatgcacgaaccatctgccgcaaggcacaaactaagctataccccttc
cctataaatgccgtaccgtgtctcccccaggacaggatcgcacatcatcgatcttggccg
gcaatctcttcaagcttggacagcgcagctcctgatctccatcgtccatcgactaccacc
agcaggcggacgagatcgag
>Pgl_GLEAN_10023817 PgMYB99
cccaaatttaacatgtctgtcaacatttcctctttctccttatgaaaacgcaaccttcca
acaaacaccggcccagtactatatacatattctcctctcttttaatgtggtctccatcga
tgggatatgcacaaatgacagttcaaattagagatgaagaacagcacgtagtgggaagaa
agaaaaggaaaaaaaatgttttgaaaacgtccagatttgccgtagacatcgacactttca
cagtgcactttgctgtggaccgcatgcgaatccgtccgtaccccaccaggaataattccc
cattgtatatgagttaggtagtgtaatttacatataaaacgcacaaaacgaaatcgacca
tttaactatctgttacccggttgcaatccaccttttaatgttctccaatattcgaaaaag
tctacttcacccccaacctatgagggttggaacacatcaccccaacccatgaaaatgaat
tttttattccctggactttctaaaacatgacaaatcacccctgaagtagttttgaaaaat
catagtaaatcacagaaaaaatcataaaatgaaaaatctaattgcgttggacttcaaatt
agtagttctacgcagtgaacatacaatatggaatgatttagtacatatttttagttgtaa
ccttatctatgcttttctccataactgtaaaaaatatatactaaatataccatattatat
gttcattgtgtagatgtactcattagaatccaacataattggattttccattttatgact
tttttgtgatttactatgatttttcaaaactgcttcagggggtgatttgttctgttctag
aaagttcaaggggtaaaaaatccattttcataggttgggggtgatgtgttccaacactta
taggttgggggtgaagtagatttccccccaatattccttcgtgtggtgtggtatgaacta
tgaaggagtcggacctaactcccaaatcacccaatctgcaagctagtaagctctacggat
ggacctatcgaaggttgcacggagatgggctgctagtccaagccttcatcccaagcaaag
tgcccaacttgctctctctcgtctttcccctgccattcgtgctgatttcgacgaatcgga
gaaaagaaggaaacgatatttagccgtcattgtcgcgcttaatctccttctttttcctgt
ttttcctaaagcacagctttttcatctgatccgtgatcaccctccataacccctgtacgg
tccggtgaaaccatgtcatgtcgccgttgtccaacggaggccacaccaagcaaccgcaca
tgtccagtcgccgaggacgccaccgcgatgccaagcggcgtcccggcggccacctcagac
acccacccaagctgggcaagcaagggtcaaggctcaaggcccccaccccacctagtagat
cacacgagatcgatcgcggctggccggccgcggccgagaccgagaggccccgcctccccg
tgcgacgtcgtcgtcggcacgnnnnnnnnnnnnnnnnnnnnnnnnnnnnnnnnnnnnnnn
nnnnnnnnnnnnnnnnnnnnnnnnnnnnnnnnnnnnnnnnnnnnnnnnnnnnnnnnnnnn
nnnnnnnnnnnnnnnnnnnnnnnnnnnnnnnnnnnnnnnnnnnnnnnnnnnnnnnnnnnn
nnnnnnnnnnnnnnnnnnnnnnnncgcgctgtcggcgtcgcgcccgtcaagagcgcgcga
cctcgagcgcacggggtgccccgcatctatctatctcctcctcacccccacccccggcgc
gcgcggggccgtgtgtgtatatatacgcctgcccctggcactgtcccggttgcagctctg
cacaggccccggcacacgcacacccaagtgatcgaggagccgtcgtcgcagcgatagcat
cgagaactagatagagatcgaggcagcgatcgattcgatcagacgatcacgcggcggcag
caggggctcggaggaacacg
>Pgl_GLEAN_10008396 PgMYB79
aattgatctgtttttcaaagtgattttggtcgtcatatatcagaccaacctctatctagc
tagtaaatgttcatcgatcagtgaattacttagaaatcaatttgccaagtggctcctcaa
catcttgtaagcttgttaaagttggaaactcaaacatgttgattttaaattagaataagt
ttcatcggcggtccttaaacttgtcttatttctcgtaaaaacctctgaaatggcatattt
ggaccttttaacttggtccggatttccaatatataggtctaatgtgggaaaaaactaaca
taaaaggtaccgaattaaaattcttgttcgagccacgtttgcgctacggtgacatgccat
tgccagtttgccacatatatagcaatagggctcatttggaccagttgagctagctgaaat
ccgcaacaagttaaatatgcaatttaagagtgtgtggatctaaatgagaaattgatgata
tgggatgtttgtgagcttcactcaaattgaagcttgtgatttgaaatcaatctttccatc
tgatgtttgcactttatttcaactaaaaaaatagaaagaaaaaacaccactggttattaa
cttacctacaaactacactagtgcatactgataatatttatggatttttttagaatgata
atatttatggatttttcaaccaatatctacagctctgtacatatagtgttaggcatatcc
gcgcataattaatagaagcagtgtacaaacaaatcaacatgctcgccctcaaaattctct
ttccctttaggtaaactaataggacaaatgaataggaccgcagacacgtattactagtac
ataagaatatgttgacacgaaaaggaagccttatagcagtgagataaatatagtttcttt
gtaactgtaacactacgaaaagctgggtataaagaaaaatgtgaatgtgaacaatccgag
atttgacatgtcccggagccacttaatttaccagaaatataattgatgagatcagagcaa
ggttatcattgaactgggggccaatatgccaatataagaatgacatgtatattgtgtccc
acagttcaattttaaagatcacattattagctaggatgatggctcggttcttatgtgatg
ggttgtgtccatatatagggtcggtaagctctacttatatttgcacaccacacatgccaa
ttagtacgagacaaattgaagcgaggtaaacaaagttggcgtagcacaaagtcatagaga
gaaacattagagaaaaaaaaccctcatgtgaacatgcatgtcatgtttggccttattatt
attgtttcatcccggccgtcaagttgctagccaaaggcgcatagtagttcttatgatatc
agatacactagtatactggagtatatgtatatcatacattcataccacagttcacaggaa
acacatgctcatcgcactcaaactttctttaagccgacacacggacgggagggtacgaaa
cgtacagacaaacggacgcgataaagaatgacacagaagcaacggcgaatcgcctactcg
atccaaagcaaactgataaaaaataaacaaattcaaacgctagcttaaactattcgcgtc
ccgtgctcgttctgtcacgctcgccctccgaaaccttccttcttggaagctccctccttt
gaccacgtttcgtttccctctagcacttttttttatcgctatcgcgaccccgctcgctgt
cgcctgtagctgtagctcccgtggccatataaattgccccgccccgtctcccttccggtc
cacaccgcaagcacaacgaagagctcacacaggcacacagcaagcgtcaagcgagctcca
tcggctcggtcgccttcgccttcgtctcgccaggacccggcaagctcgctagctcccgag
ggctctccgacgttaacgggcggcggagttagttacagagagatcagagatagatggggc
gcgctccgtgctgcgagaag
>Pgl_GLEAN_10012406 PgMYB72
ctaatggtgatcttattagaagcaatattgtaaatataatacaactattaaggtggcctc
tatgagactgagattgctaagccaagtagcattgtctggcaacccaatttgtaaggaatc
ggatgctcgttagtctaagagggggagggggtgaattaggcaacttaaaaccttaaccta
tggcttcactaattttacacaaatgtaaactagaacatactatctagatgtgcaactagg
gttgttctagtgtaaaactcccatcccaaaacaaggtttgcaacctatagccaatcctaa
catgatactactctaggaaagtaaaggcaaacaaagattgcaatagagtaaatgcggaaa
cgtaaaggggattagaggaagcaaactcttgacacgcgatttatcccgtggtatcggtag
gcactaagccacccctagtccacgttgttgaagcactcgcacaagagtattgcttcccgg
tcaccaagtctctcccaagagcaccacttgactcgtcacaaaggatagccacttaggcaa
gctctcttggtcaccttgatgccgcctccactaaggagcttctccacttaggaagggggt
ctccacgtcccccgcacaaagtgtcctcgccgctccacaccaagccggagggtcgatgac
gattgccggtgagccacttaggccccaaggcttccggcgaaccttgtacactttgattca
ctcaagaatcacctcacaaggttggcacaaccttgcactcactcagctctaagctaagcc
tagcactaagcacatacactaagcatatgcaagtatatggatgagcaattaagcacttgg
atggattggatatgatcttctaggtgtcttgaactcctctgcacttccacacaatccagc
aacctcaaatgggtgagtggagggggtataaatagcccaaggcatcaaactagtcgttgg
ctaaaatctgctgaaaaaggtaccgtcggatgatccgacgctatgcttttccagagcgtc
ggttcatccggtgcccctcccacgtcacgtagccgttgaggttctctgacacaactgctc
cgacgctacgtcgtatcatccggtgctgaaggcctcgcgtccaagtcgtcactgttagct
tccaactgaccgtcggatagaccgacgctttctcttggccaggcgtcggatcatccggtg
ctgaaggcttcgtcttggcacgtctctgtatgaattcaaactgagcgtcggatagaccga
cggggtccccactcagaccgtcggatcatccggtgctactttcttccttgctcttcctct
gcaactcgtccgacgctgctaaataatggaccgtcggttcatccgacggtacctagggtt
tgactctgtgcaccaactcgtccgacgattgcaccgacgcttgtatttgagggaccgtcg
gttcatccgacggtgtcttctcttttccttttcttgctcgttttgacccttgaaaaatac
actatcttctcaatttggcatatggttttcttgcatcattgggacctagaattgtctaca
aagacatgctaaaacaataaggttagtccaaatgatcatgttgtcatgaatcaccaaaat
caaactcgaactaatggcatatgaggccatgttcgctacacaattctgtagcaagcacac
ccaggacaagtcagcaaacgatcaaaggatccctatatttaagtgcagacaccaagaccc
ctgccctgtctacaacgaacgtgcacgtcggcatactcaaatgtccaagggcagattagt
catttctacttgtataaactatctttaacctgggtttaggaagcagggatttccgagtct
ttatataccgccggaagctgtgttctggtgaccagccagcaaagaaacagggagcttcaa
gggccgaggggaggcagcaggcaggttgtctccctcgttcccaactgcaccaccctatcc
aagtcccatctcacctatca
>Pgl_GLEAN_10027268 PgMYB80
gaagcggcagccgaaggcggcggcccgtgcgcagcgaagcagagcagatgcgcgcggtgg
tctgctgggaggagcagccgatgactccttcctcatggccggctgccctttcttcctcat
ggttggtggctcttccttccaaatggacgacgaccccttcttcctcacggtcggcgggag
agggcggccctgttcggatggagttccgccctagatggagagggtggcatcttcggcgag
gtgtgggtggcgcggggaactctgtcggtcctggatgcggccttctccggcgaagtgaca
ggggtcgggtgagcaccgccgctagggtggtcgaggtggagaggggcaagaagatggtca
aaatcagatgccacggtatgacatccaaacatgaatcagtattgaccaccttcttcaatc
tatcaatttcatttatatccaaacaatagtttgggtattggaacctaatatcagtactag
tctgcctccaatgtctactcccaaacgcagtcgtggtgtaattggacgcgagtgcttaaa
aatggacacgtagggtaggcatggagccgtcagacgtagaggtcagacaggaagtaataa
ggcttcatttcgatttcagatatacgtgtggacactatcagattgtgaagggggcgtatc
acgtgaaaagagacatgcaagctggctggctgatgtctactactacactcgagcgacatg
atcgagcaataacgaaccagaaaccttgaccaacacgagcgacgacgatatgggtatggt
aggccataacgcaagttattgtgggagcccaagtcaactgtcaaagaagcacgagagcga
cactgtacaagcggaaacgtggcaggtcaactgtgctgggtccggagtccatccagatct
agcacgatgatctgagagcgcgcacacgacacacacacctgatgcggcttgggaccgagg
tagctagcaaccaagaagtgcttgcctgctcggcctttggcgctatgctaagagggggac
gggtcgatccgtccatgaagcttgcacaaaacctgggtgctcgcccaagcactagtaaca
ggatcgcccggacgtgcgacagcattctcacaaaggatttcatgtgaagtttacgtgaga
tagatcgcgtcacaagtcacaaacagactactagctagtacagtagtaggccggtgtgtt
gagaacgtactactgtatttctgtctgtcctgctcaattgcccaaaacatctagagagat
caccagtaacgagacgagacacaccaccaaatcgattgttgtgttctccgacgaggacga
ctcggaccgacgactattcacagagatcatcacctcacacgcgatcaatgaccccatcga
ttgcgagcgaaaaactcagtcgaaatctaagcaaagatttgccggtgttggccgctggcc
ggctacgggctaacaaggaaacatggtttgtccttgtcgttggctcctccacgcagcacc
gaaaaaaacacacagacaggtgaggtgctaagctaataagctagtagctcgctttcggca
ggaaatcctacggtaagtcggtaatccgtcatcatatccgtggagaagaaagcgcgcaaa
aaagcttcccaaaattacccgcaacaccgatcgccggaggggtatttccggcaacgcccg
cccggcaccatcgcccatcgcgtagtgagtggcagtgggatgcccccgacagcgacgcgg
cgcgcggcctccccctgatgctctgctgggcgaacccgtgctgggtatatatgcggcagt
agctcactcggttgccgcgcatcacctcactgagctagacacgctcactgacttaacacc
tcgttggggtgacaagctcggggaggattaaggattgattagagctcgatcactagtgag
atcgctgaagtgaaagacgcaacaggtgcttcccggcctcttgacttgaggtagcgagag
aggagacggcaggaagatta
>Pgl_GLEAN_10003205 PgMYB84
gcgcgcgctacagagcgcggggacgacgtcgcccagctcgatttttattccgtttagccc
ttttcgaaattgccaaactccagaaatcgtcaactaagtgaaaaatctcccaaaagcaaa
gttgtagaggagctgtggatctacaactttcccgaagggtgacatatgttttgatcaatg
gtttgcccaggaacgccaaccgaagttgcagattttccacggctcagtttactgttcaca
gcgcagtaaactcgatttttggccaatttgcgctcaaaattggaatgtccgccaattacg
aaaaatgtgttcccggaaataacgaacaactttcgtgttggcagattttgaacttctata
gtgaaatttggagaacgcgcaagaaaaccatttcagcctttaaagtagatctagggtttg
accgtggtttgagatgttgaccggggtcttttgtgcaaaagtgtgcccaatcaagtcaaa
catgcttaggaggttattaaccttgattaattcctataattgatgtcattagcgcaacaa
aacatccgggatgttacaaagaggccacctcctccaccgccacccgcgcccgacatcgac
ccgccgtatacgtctctcgacgtcgcacgtccgattattcttttttaaaaaaaaatgtcg
tacgacggattaacatgtagtactacggaggtacgcccggagcaaccttagcagcaacac
gcacagaaaccatgaattgattgaatcccgatcgatcggattcagaccacgggcctccca
tgcgtaaataatggtcccctctcgtgtctctcgtctcgatcctatctgcttgcggcttct
ctcgctctgtcaactgtactttgccaccggcaaccagacagcagtaccttttctctcaga
acaaatcagcaccagccaccagccagcggccaaacaacacagggtaccgttcacgcgtaa
ataacggtattaagtcaaacctgtttgcactataatatcactacagtaaatcgtagataa
ttaaacgcgttagatccgccgcgtaaagttgcagccacccgtgaaatgattttgtaaata
aacttcactcagcacttcatgcacgcaagatttgcttctatctaaattccagacgacagg
aaacaagcacggccaggtaccaatcgtgtgcgctactccctccgggttagtaaatgaagt
cgtcgtggacaaggtttgagtcacacaaatcgtgaataacttttaagtcgttgagtttgg
aaatgtgatttatcttgcaaaatattttcataaaagtacacatatgttggtttttaataa
attttcttttaaaaaaaataagaagccaaagttttactttagatacagtgtcgctgtcct
aaacgacttcatttaccaaacaggatgggggtatacgccaatgcattattgtcaatgtgg
aggcaaaaattgccccccccccctaggtcttgtcaagactagaaagactagcgcgtcatt
accgcactatgacccgtagtccagtgattggtacgaaggttagagatttccagattgcca
gagaggtggcttaaataaattgtagttgtataaagcttgtggggttttaattaaattgcc
aaagcaatgattgaactgtagtttactttcgatgaagtttgaggtttgtgttccttcaaa
gcttgaggggattttgataaaacgacatgtgaggtggctgaaataaaattgtatttcagc
aaggtttgagggggttccataaaattatatgtgtgagttggactacatatcaatgtccat
aaagttttgaggggggattttgtaaagttggcaacccttttggcgttctttcaaagctcg
aggtggtttccataaaactacctgagaggtgtcttgtgcaagctatttttgtaaagttcg
aggggttttccctaaattatcctgggtgtgggtatccacgcgcggtccgacgatcgagat
ttccctgcgtttgtggcgca
>Pgl_GLEAN_10012225 PgMYB73
cattgtttgcatcttgtagcacaagggggtgaggggggaatcgacacagtcgcatcccta
ttcaagatttaatgccggttggtcgattgtcaccgtgcagatctgctcggaacagtaatg
ttttgtggaagattcgtcagagtgactgcatcatcagctaatagtgtacaacccgaactg
tgtcgtaatgaattggcaaacgtcttacacagaccgagtcctaagtttcatctgtcgaga
tcattggtcgttttccaggtcgatggccgactgtcttacttccatctcttcgtactttca
ccttaaaaaaatatcttcgtattttctctagttttgctgtcctctcaagtcccaaccctg
tgatggaattgatatctgaattgcatcgattgcactagagagcctataattccggtcggg
caggggtgggtttagattggagatttttttcttttaagatcacagaaagaattatgctat
atgtacatcgtcaaattacgaataatactttcaaacttctcacactctaagcagctccaa
gtcccaatcccaaaaccatgtaagaaatcaattaaaaggccgcataggcctgtacgctgg
aatgaccacaatcttcttccttacttctttcttctacctctttttgccatcgatggagac
aaaagatcgatcacaatttatccaatccaagactgatcaacaccacctcagaggatatat
ttattctcaccatcctttcaccgtggttggatctaaccatgacaaaacagagaagtagct
agagaaaattattctataatgatggcaccatctccgcctcagtgttgccgccgcgaaacc
taattctccatgttgtaaccccaagaaaggtgttgacatagtagatgccgcaacctcctt
cattgaagccgccatggagagatcaaatttggatttaaaatgtttagtttgaaaaaagct
tggagattgtgagggataatagtgcattgagccgtgtgccctaagaaatggttgtgatgg
gtgaaaggatggtacgtactccctctgtccacgaaagaatgcaactctcgcttttcgatg
agtcaaactatttaaactttgaccaaagatatagaagaaataacattcctggaacaaaat
aagtttcaatagattagttatagaatatactttcacgataaaattatttgaaattataag
tgtaaatactatttactttagtttgaccaaatttgatcaagtttgaccggcacggatccc
atagttgcattctttcgtggacggagggagtagtgtttagtttgaaaaaaagtaccggtg
aagatgtaacaagaggtgacgggtacgagaattgcagcctgcggagaatgttgggttgga
ataaaaaaatcaaatccctaggatctagtgtaataattatacacaaataagttaatttct
aggtcaactcctaccacgcaaacaccctgtcaggggtgctgttattctcatgatccccga
gtgtgactgacgctgtgttcctccagcatcaaagggtcctttctccaccacggtgccacg
gcgatttgacccgtttccttttcttacccactgagctccgaaccttctggtgtgcttgca
tggccaggttcgtagttcgctcaaccaaaggccaaagctagcatttcgtggtcgtcggtc
cccgtgcaccgtgcacacgctcgcatcggatcgccgtcgcaggcaggcggagcaggccag
gccagcgttcgtctgcgcctgcgctgaggtcacacgtgcgggtcaccccgcccccgctcc
ccgccacgtgcgcgcggcgctttccacttcgggccgcgcctattaatcccccctgcgccg
cgcctcccctccaaattaggctgctgccgccgccgccgccgccgctcttgttgctctctt
ccactcctgccgccgccggcgttgctgagagccgagacctctgacttcacacttgagtga
gttgtgcgcgagtgagagag
>Pgl_GLEAN_10035636 PgMYB91
ctatgtacctatctgtgatggaacgaataaagtggaaaagttaaagttaaaagtatatga
tgagatcaagggggagaatgttagaatgatctcatcagtgggcccaacggcccactcggc
cccttagtcttgcgccctgatcgggggcgcccaaccctagattggttggcgggcccctgt
catactgcgctatataaagaggtggggccactggctcgaggtacgaggttcgccgccagc
cactcaccccacctacaatccctagccgatctacagggaagcgtaggagtgacgggaagc
gccgccgccgccaccactccatcgaccgtcgctgccctagcgcagatcgggcttcgcgtc
gctgcccttgcgcagatctcctacatggcaagcggttccggcagcgcccctgccggtgat
ggtatacacctctcccctctactctctctctgttcatgcatcacatctttcgtatacaca
cacagtgaaaggttttacccgagtagatccgcacctagtagatcctaagtctatcacttt
ctctcatgaagtgttgttttggtcgtttctccatgcctccatatttccctatgcaattga
catgtgcattatcacgtcgggatacatgacacacttcatcttcacattgaacttcttcca
tccaaatatattgaatggatgctgatggagaggtgatgaatatggctatttgggttggga
gaatgggagcggggcacaggtccccttcccacccattggagctcaaggagaggagacgaa
gatagatgaatcctcattaaaaaatgagaggtacacttgtgtaacaatgagtagtacact
attatatatagtttggcaagcaagtttggccatgaaagaaagtaattcaggaggtacatg
accagtattttttgcaggtgacatggaagaagtagaaagggacaaaaaagggatataagt
agtaacatggttttgttggtttttcttactctcttcgtaatgaaatctacactaccacag
ccatcgtgataccatagggatgtttggggaggggtgaacgagcgaatgaaaatagagagt
ggtcaaaaaatggccactccccttgatccttattgacactagtcgtctcatatcaatcca
ctccatggatgtgaatgtttaaggaattagagcaactccagcggatggagtaattttgat
cccctatataaagttattgggggtggagtaaaactattttcatccccaaaacacaatttg
cttcagcagtttcactattatccttcccaactcgtgggtcccaccgcacccgtcagcttc
tcgttcacctccccaaatcttccatctttggaaactgcggtggcgcggcggaggtgaagg
ctgagacggtggacgcgccgtcgccgcctgaccaccaccagcagcaacagcatccgcaac
aggagtggcttttcgagtgggtcccacatatagggggtggatgagagattccctctatag
aggggatggagagggatttttagtccatagagaaaaaaatgactgctataggggatctgt
tggagaagatttcatcgcctatatgactattttttgctattggggaggggaaagtgaagc
tgctgaagttgctcttaggatggtaggatactcattcactagtagtaagtaaaaaagaga
agaaaataagacatgagagaaaataatgggcccacttggcccactcaaatcaaaggaacc
actttccgcgaaacctccgtggcctggttgcattgcgcacgtgcccggagcgctactact
acggcttcccagttccaagcataaatacccggacaccctcgcgactccacccttgcactc
cagcacgaccaggaccacgggtacacgacagtgctcccgtccccgaagacaaacacacaa
cgccctccctctacccccacgaacacctcgaccagacaaacgcacaagcacagctccaca
ggcaacagaagcagatcgca
>Pgl_GLEAN_10018370 PgMYB90
atgttagagatcgaccgggtacggagcacatcacgtacgcgtagtggtggtgctgcgcgt
cactactcgtggaatgatgcgcggccgtcgtcacggagagatagagatcggccgggctgg
gattagtttagttcgtttgtgcgtcggaaagtggtcgcgatcgccgtcgctacaagtacg
attgctatcaaagcgtcgtttgcacttgcgcgcgcgccaggtgatgatctgaagaagaag
aagaagaagaagaagcgccaccacttacttgttgagttgttgcagatgcagctatccacg
cgtcggctttctagaacccgcgcgcaagttgtgtgttttgtaatgtgtaatgtctggcac
tacgtacccagggcaagggacacctagctagctatgatcatgccaagctaaacacattga
ggtggcaaattaaattaaggtgaagctgtatgctaataatgctatattgggacaaagaca
ctggatggtagctgcccttccctagctagcaaacactctcccccggcccttaattactcg
tgtctaggatagtactcccaccgtattgaaatagttgtggctgttgacattttcttacaa
ttttgatcattcgtcttattcaaaaaattattacaaatatgtaaaaggataagtcggaac
ttaaaatacatacaagagtaaagcatgtagcaaacaaaatatatggtacttgtgtaattt
ttgaataagatgaatgatcaaagttgtagaaagaagtcgattacaacattattttgatgc
ggagggagtatgcatggtggtcaaaggcacggaatcttgttaattactctttttttctcg
aatacacaggagatctacgtatcattgcattaagaagaataatagtttgtacaacacgtg
gccgaagcacatgcaccaatataatgggccctagaggatattacatagggagggcaacga
aaggagggagcatgaaaggcgattactcgttaaacaaacaacctagatgcctagcaccgg
cggtgatccagttttcgccctcatgcttgatgatgcgaagtaagccggtcggctgcagcg
ctcaacctcacggaacacacaagcgcgcgttccgttccttccatagttgccaggcaacta
aggtgaagagggtgtcgaatcccttgcgctttgcacctggtaattggctcctcaggtgga
accaccattcctgcacagtcatgtgatctcctccctgaagattgaatgcgctgaggttgt
taaggagctgtgcatatagtagtatatatactacagggtacaaacatatataccgtgtca
tgtagaattttattattcaggtctaaatcagacaccagtcgtttttccttcattctttaa
tttcgtttttaactttgtatgatcgtttagagcacgtacattacctaaaattcaaaggca
ctctttgttctttacacctggccctccagggcatggcgctttcgcgggccaagaaataag
cacgcggtaacagcacacgggagacacgacctgaggtcgaaaatttaccgtggcttccgg
ggcaatttgggaaacaacccagctcaacagccgagctagtggtatagtggagcatggaat
tcccctgacagcgacgcgcgggggcttaatttggggatcgatcgacagggaaggaataga
tggagccccggctcgccggtgcccgatatatacgcggcagcggctcactcgatcgccccg
tgctcttcatcacctccatccgcgggacaggcagaatccgagcaaaagcaaaggctttgc
tcgctcccctagctagcctccggcctcctccgctggccgccgcccgtggatagctagtgc
taggagcccgtgcctgctgctactagcccacaaatatctccaaagaacacacacatctga
aaacagcagctcgatcttctcttcaaggcgcagcaattcagaacccccgatcgagctgag
agctttgtgttgggctgcca
>Pgl_GLEAN_10012731 PgMYB89
tcttggcacgtccaaactgcaaattcttcgtgtggctcatccttcgaaacggggtctgca
tatccgacgcactggagcggtgaggttagcctaacactgaggtgtgcccgctatgcagac
aaacggtggaatctgctttccacctcctagcacaatgctgttatacaaagagagtatgga
gcttcatggtcgattaggatgcagaagcaaccttaaggctagagaattggcagcccaacg
acagtgccttgtcatagttgacgacttttaccctgacaccgcacattccgccaaaagcgc
tacattgtttagcgcggcttgtcatatgggaaatttggctacagggtaatgccagagttt
ttgataggacggattcttgttgcctacctactttatctaaaattaagatttgtggggggg
gggggggggttattgtggatctccgacgagatcgtgaatgatccctaattgggcactatt
ctacccgtatgcaattcttcttctttatcaatgaaatagacacactccgttcctaagaaa
aaaatactttcgagctctgaatgtgcatcgccgcacggtcatttgagcacgcacaagccg
tgcatctggctttttactgaaccagagtgggaaagaacatgatgagatgttgttcttgaa
gttgtaatgcccttggacactgtgtttttcatgacagagatggcaggataaagtagcatc
atcatcgcaagagtgtaatcgaagtgcagcagatagaattatcgctgtatatactacaat
cccctgctaggctctgcagtatagtttatccgaacgaactgtgttatcttcgcagtatag
ttcgcatgaggcacgcacgggtgtgtacgcgtttgattgtgtcgtaaactttatttttcc
ccgcttaatacaatgatgcgcagctctcctgcgtattcgagaaaaaaatctttgcagtac
tgccactatggccttgtttggatactccagcagggttagagttagagctagtttctaact
ctagctctagccctaaactaactctagctctagaggtgtttggatgaaagggttagaatg
gcattaaatgtactttttcaatcattagatgtggatggagggagtgagaaaagtcacttt
ttggtggacccaacatgaactagccccaataagcacctcttgggtgggatagttttttag
gtgggttagatgcaaactagctcaatctagccctcatgtttggatactttgtggctagtt
gagctccaactagccaaaactaactccagcccatggatccaagcagaccctatgtgttaa
cctctaagagtctgagagggttagcagcagtatcgtcagtttataactgcagagttcact
ccgtttcacttgccaattgccattgccgattgcaccaatggtcagaggctagaacaccat
cacgcaaagccattgccaatttgaccgctgcctttgactgacggaggtgaaagaaccgat
gatccttgcatgcacgcacgccctcggcacggcgctttgtaccaccaggaagtaccatcc
gcggcgtcgatttgcgccgggaaccggagcgatgagacgacgccgagaagagcaggagaa
gggaacgcgccgggcgccgggccacgaggcctctgcggcttggaccgggggttgacccgg
cgctgtacgggtgggcaacctgtccctgctcccgggggcgccgtcacgcgttgcgcgggc
gttgaattctttatgccactcatgcctccttcgcccgtgcgcgccgcacccgcccttccc
gtgcgctccggccgcggcgcgcgcgcgcctatttatgcgcccggcgcccgtggtgagcgc
cgcacacttggaggacactcaccatcatcagagcaaggcgtcgctgctgggacgtgcgac
gccagcatcagctcgtgggtttgaggagtgtcaccggcgtcctcagggcggcgagctgcc
ggaaagcggcggcggcggag
>Pgl_GLEAN_10038634 PgMYB86
ccttcaccacctcctcctcactcccttctcctcttccccctctttcttttttttcgaatt
attatgacattttcggctgaattttggtgttatataggcagccagatcctagcgccgcag
cccatgacgctagcaggcctgttgccaccgtgccccatggcgctacgacataacgtcgta
gctcaagacgctatgttcctaacaccgtgggttacaacgctatgtctgtcccacactaag
ggcccactgctggcggctcctaccgccgtgggccatgacgttatgtccctgacgccgtgg
gccatgacagcagatgtatagttttgcaaaatttcgagcggaccatatatttttgcaaaa
tcgtgatagaaaaaatataaaaaattcggttttgtggggtgcggcggctgggccgatctg
atgacgaccaaaccgccatgaggccatgacgacctccagcacatcctctatgggcgtgtt
tgatttcagagctctacaagacccgaccggcgagcctggccaagtccagccacagccagg
ctccaaagtgcaagtgtctttgtttgattcaattgtaccaaatgatccaggctcagcatg
aagtgtgtttgatttgcctgtattagtgggtatgactaccttgcacccaagaatatgtag
ccttaccgctcatcctttcctgctctttcctatgagtcattttatcgaacacctgcaagg
tcgcctggattgcgccgccgtcgccaagggaacctgctggcgcgcaccgctgagatgaga
ggggcggaagggagagaaagggagctcgtccgacggtgaagtacggccgctcacctacca
tgcgacatcacccgggggtgcttctgcctcgacacgcggctcctgcgtgcgcgtggcccg
gcaagccgnnnnnnnnnnnnnnnnnnnnnnnnnnnnnnnnnnnnnnnnnnnnnnnnnnnn
nnnnnnnnnnnnnnnnnnnnnnnnnnnnnnnnnnnnnnnnnnnnnnnnnnnnnnnnnnnn
nnnnnnnnnnnnnnnnnnnnnnnnnnnnnnnnnnnnnnnnnnnnnnnnnnnnnnnnnnnn
nnnnnnnnnnnnnnnnnnnnnnnnnnnnnnnnnnnnnnnnnnnnnnnnnnnnnnnnnnnn
nnnnnnnnnnnnnnnnnnnnnnnnnnnnnnnnnnnnnnnnnnnnnnnnnnnnnnnnnnnn
nnnnnnnnnnnnnnnnnnnnnnnnnnnnnnnnnnnnnnnnnnnnnnnnnnnnnnnnnnnn
nnnnnnnnnnnnnnnnnnnnnnnnnnnnnnnnnnnnnnnnnnnnnnnnnnnnnnnnnnnn
nnnnnnnnnnnnnnnnnnnnnnnnnnnnnnnnnnnnnnnnnnnnnnnnnnaacggggacc
gcgagtgcaggggaggttcgtcccggcaacgccgccgcgagcgctatcatgggcgcgggg
gaggtccgccccggcgtcaacgtgagaaacgagagggtgagggaggtgagacgaatcgga
agggagctcggccacgacctggctccaaagaaacgaagttccagagcgtgcggcaagagc
caagagagagaagcgattttgcatcctacggaccaggctggtgaacagggccaagcatat
caaatacgtgaaccttcacgcgacgggcttgactgatggttttttgcccatatcaaacac
gccctataagcccaagtccagaaccgacccgaggaggcatcgtttcgctacctcccgctc
cgctcctccaccctccccctccgctcatcccaccccaccgccgccgccgccgccaccgac
gtccacgcagcacccacccacgccgtcccgctcnnnnnnnnngcctcgacggaaccctag
aacctaagccgggggtcggctcgccggagcggccccggccgggggggcgctacctcggcg
gaagccggtgaccaccactccgccctccacggaggagaagaacctggggaggaggaggct
gagacaaggagtgaggcaag
>Pgl_GLEAN_10003061 PgMYB92
agataacttactttctccgtccgtaaaagaatagtccacgaaagaaagcaatttcaaaat
atacaacagatgatatgagaacacaaaaaacttccatatcacttcaccctcttccagtta
cccctgtcccatttaatctctcaccaggagtacatcggtctttttactcatttcttactc
tctccatccacttttataggatgtggcgaaaatcaatttttgattatgtagtacgcaacc
cttgaaacgttccccttagccatcgagactacgtagactatgaagacatctaaaaatctc
gcaatgctgctgcagctatgcaaatcaatgcaaagattaattgtggacaaacactaaacc
actgaaaagtatagaacatactcgcgttaaacaccaccctaccgtccgcattaaacccac
ccacgcgctcgcgttggccgtgagccaaagccctccccgcacgctcggtcggcgccagcg
ccaacgttcgtagagacgacgaaacgggacggcagcactcaccagcagtgagcactgagc
agacaagacaaaagacgaaacgcgggaggtcccatcatcaccagcgagaccatgaggacg
acgaccatggcactccgcatgtcaggggctgctgctttgacaacacccaccgcccggggc
ggcggccacgactcgtcgactccctgtcccgttcaatcaccgtcttgccgtgccgctttt
taccgtccttcgctaaaccacgacgccttgccgccccccgctgccgctgcggcgttgctg
cctgctgccnnnnnnnnnnnnnnnnnnnnnnnnnnnnnnnnnnnnnnnnnnnnnnnnnnn
nnnnnnnnnnnnnnnnnnnnnnnnnnnnnnnnnnnnnnnnnnnnnnnnnnnnnnnnnnnn
nnnnnnnnnnnnnnnnnnnnnnnnnnnnnnnnnnnnnnnnnnnnnnnnnnnnnnnnnnnn
nnnnnnnnnnnnnnnnnnnnnnnnnnnnnnnnnnnnnnnnctggcgcccggcccggccgc
gccaaagtccgagccgcgcccgtgtggcagtggcagtggcagagggccggccagacgggg
agctcagaccacctcatttatggtggccggagtgctgctatacctccgcttcacgtctcg
gtcccatcggcgggatcaaccccctcttccaaaccttcatcctcccaaactattgatgag
ctgcagtgcagtcccgcccatcactcgcctgcgctggatcggatcaaatctatctatcca
gccccggcctattctacgagacacagctacggcctattcagtgaaaccatccataccacc
agctacggcctattcagtgaaatcatcctcctgtgttttctggtgatctcctgttcttga
atactctgaaaactgaacacctgaccgcactagcacgcacattttggcattttgtgcact
gcgacgaaattcacccgtttctgctcttcttcgagtgcgtgtacagcccgtagagatgga
gaattatgctaccccattataaattcaagtgaaatcctggtggattttcctctgtatttc
ccacgcacatttcggtcactctgtacgtctaaaattcgcgtaccctgattgactgcgtgc
tggtaatttcgcaggcaggaaggcagttgtacggcgcgcaacaacagacagccggtcgtc
ccccaccgcattcaagtcgcccccgaccccgcccgggcgtacttgcaaagaaagcacctc
gcccctattaaatgcatgggccgtcgatcgctagctcataattgatgccatgccttcctc
ccctctcctctctcgtcgtcgtcgtcgcggcagcagcaggtgaaaatccgtcgcatttat
ggccaccgggatcctcctcggcctataaatccgtcggcatttatggccacggctccacct
cgtcctccttcctcctcccctcactcctcgctcccgtcgtcgtcgctagctgccgacgcc
atcgagggggaacggaggcc
>Pgl_GLEAN_10003063 PgMYB93
agagagctggctatttggctattgaagttgtgaagctgctcgtgaagtcgctcatgaagc
tgtaccaaacgggcccataatgcatgtttggtagcagagcacgttaataaacgataaaga
atgcaaacaaaatgaagtaaacgatattggttgagccaccaaaccgcataaccaaatcat
ggaaccgaataaaaggtgccgagtcgtgcgcaatgattcaacaatttgtgtgtaactata
tgcataaagtactccaccgtactgattttccggcattttcatgtacctgcaaacgggcgg
ccaagtgtacgtatgggtttctttttagaagtttccttgagaagaatgcttccttcggct
ataaatgaactgggtgagttacttcatttgtactcctgtggacaagccattggctcgaag
aaaattcaacagtggacctcttattaaaattttccagcgacggaaaaaagaaatagtgca
aaactaaaaatgtactgaagcggatggggattggtgcttggtgttgaacgctgttcctaa
aatgttggtgggatttgtgatttctgacaaacagagtggtgtgtcatatgtcatggacga
atgggcataggagtttgtttgtactttagtttgcgctttgcagtgcaggtatcctatgtg
ctgcagaacaaataagctagctataacaagaaaggaaaaaggtttgaattgctaatctca
agtgtagtgaaagacaagataaccttataatctatgttttggttcaacttaacctctaaa
gttagctatttggttcaacttaccccacagtgcaatttgtcatttttatttcttaataaa
caagttgaattttaattcgaaattctgcaagatggcagcggaaatcgtaatctatattag
aaaaatattttatgattttcagcattagttttatataattttgtatctcaaagagaaatt
ttattattaagtattctaccaatcaaaatagtgatgaaaaatcatgatgtattttttaaa
catgccttacgctgcctcctataattttgcaaaatttaaacttaaaagtccacctatgca
tggagaaataaaaaagataaattatgttaaggagtaaattaactctaatggtaggttgtc
cgaactttgatttactgagtctagtaatttagactttaaaaaaaagtcagtcgcgaaaag
ataattgaagtgatgatggtgacaaaaattaatggggagtgaaggaatacagaccatcaa
gggcaggcatcacacatgccaattgagtctcttgacagaaacatccaaaacacacacccc
gttccttctccttcgggtgtggatcgagttctggatgtgcagaggccgagcggcgatggc
agggactcccgcaaaatggctacgcgtgtcaatctgcagtggtgaggcaagtgtacgtgc
gcacagtgactgacgcctggtgcgtgacggccggcggcggcggccaagcccttctgccga
tgctttccgcaggccccagcaatgatagaactccagagacgaaaaataatccactgttaa
ctttctccccttgcaaatgaccgttaatccttcggttgtctccacttgtgctcgtaatgt
ttgcagtccctgcaaaatttatgcaaaacgtcctcctgtgcccagtttacaggagctctg
gagatcagcatttcagaaatgcaggcatgacagaccactgtccgcacgaaaacaaaagtg
cacaagggacctaatcccttttattaactcggcgataaggtgtgtaacaataacaaaacc
tatcattggcttccagccctataaagtcctgcgcccagctagttctctgctcgcacgtca
aagcagaccgacaccacagtgccccgaatcctcctgccacgcaagtgcctccttccccct
cctttcctcccccccctgcggctgctcggagctctcgccctccgcggcggcatttctccc
ctctgctgaccaagcagtca
>Pgl_GLEAN_10034291 PgMYB121
tttaggctgatgggatgtggagatactcgacccattctctcttaacagtagtatctcata
aaagtagtcttctttttaacatgagcagtaataatatccataaaagattctggaagacca
catattgccttgtaagatgctacactatactgtggttttttttaatgtcagtaactgtgc
aagcgtgagacgttcaatttatagtcgcttttgtgtgacttctctatatcgttggccaca
gctatccagctcgatcattggtgataccatacttgtctgattgaatcacattgatctaca
aatagtctgctcagtttcagttactttgtcctattttgtctataaataataagacgctca
agttttggcacgcatctttagcagattgaagtttctatgcagattcagtgaaggctggaa
tgctggatcaatggtgtgttctgttcttaactttttatggatggtttagcattgtatacc
agaatattgctgttattgtaacagtagtttctagcattttgcttgcagacacagcataaa
ttagttcctgtaggcagactgtcattgtgcaaaatatatttccattgctggctagcatag
tacctgaatagcattcacagacaaatgattgattgcatgtatccctgaattgacattact
tttttagttacagagccgcagtcatttcttcctcatgtcggcagatgttaaaatacccac
agatttgtaagctgtcccttgctgtcatttctgaataaaagtaactggtaagatgggtca
ttttccccctttttactgaataggttccgagtttggtggattcagaaactctacttctta
tccttactttgcatcaagttatgactcagctgtatgctgttgtttttcagcaaacatgaa
tgtgagctacgcatctttgtattaagaagtaaagaaccgaggtgacgtaccactttcgca
tatgtaatcaattagctacccttcttatctggtgtgctaacttgatatgcaaatagaact
cagaggctaagcttacctggtcagtcgtaatgatgatgccaaccagtctcggagagctac
aactacaagcctaggatgctgactacctgaatgttgcaactttctcaacacattttgatg
caacattaacatcatggttctcagtatcattgtattgattcatattccatacctgcgtaa
acttatgttagatatgtggcttgcagaggatacatgaaggttactttgttcctcatgctc
tgatctgttagtatgtgatgatgaaatgttgttgaaatatagttccttaagatgccaaca
agggcgacacatatacccctgtggggaatggaaacaacaaaagctgcaactacgccaggt
gcgctgcagcttctatactcgggcgatatgccgatatcatacttttggttatgtggaatc
attttcaattaagttgtcattctagaaaaggatagttaactgagaattgaactaatctac
ctgcaaggtgagaattgttcatttcattgtgccaattaattaagatcatacaccccttgt
actatgttggaacattttttgtttgagtgaacatgatcgtcgactctggtagtaagtacc
ccgtgatgcagcagtatcttcattaactgttttttttttacaaaaaacataaacacagca
cagtttatcatgggtcagactagactcttgcttccagatcacactaaattaaccaaatca
ccatcactatctccatcaaccaaatagaaaagcatgaaaatgtaaaaggacaagacaatt
ttttagtgaaattgctcagatttatacatatatgggcgcagacatccattgtggttgcaa
cagagctttcacaacccttttgtctgatgcttgtctgcagagtttggtggctcgcgacat
atataaaatgcaatagaggcttaatgactgccttcttaactcagtacttaatctggtgct
agctgatagtaaattgatcg
>Pgl_GLEAN_10021819 PgMYB106
gtgctagactggtgtagatgctgatcttgtgaaaaggattgctccctgcagcttcctgct
ttactaggttgtgttgtgcaaaatggtggcagaaatttcattagtcctatgccgtagtcg
ttacagccttcgtgatcagaaactttaccagtttgattcattttttcccttattgtgtgc
tctgcaccgtttttcctggtaaagcatagaaattcagaagtaaattaggccatcatgcta
cagttcttttacccccttcggaaatgccatgcttccctaatcatttctggttcgattgct
tcatgattgtttcaactgcttgctcttcatctctggtgcgcctttggaatattcacctgc
atatgcgagaattatgaccaggccagagaaggttgcaagtcgatgaggaatctgaatgga
aaaaattggagacttgctgctgtgtggattacctgaaccgaaagtttgcaccatctgtac
aaagcaccacagatccgagtcccatcctgactgtacccccccaccgccttcagtttgcat
gtctcggtgccatagccgctagataccacatcgaggtttcacgcattgctttcaacatcg
atttgctttgtttccccatcgttatgcttggtgagacggtaaatttcgtaggaccaacca
cgcctatagtagcataggattagctctgtttgctaacagtatcttgttcaagattcagtc
taatggctagtctaatggttaggcctcataagttagtctaaaccaaaactgttttgtctt
ggatccaatggagtgtacgcctgtgtaacccaaccattagcatgtagcaaagcgccaaac
ctgggattagcgctggtccaggcgtcatcaaaggtgggcattattgtgtgagatttgctc
gatatccctctgccttggtttttagctttccctgaggtacgagcattaggtttggcattc
aaatccgggccggatttgagctccgtcgtcctcgatgaggcgccacgttaatggcggatg
gcgaccccgctccagaaacaagacaagcgcgcgagaaaacagcgcgtgctttgctcgcta
gtggccgtgcccccgtgcccacacacatttgtcttgtctccatgtgtgcccgctgattga
cagcggcgccgtagccatggatggatgcctgattgcttgcttgcttgcttgagcttcact
tcagtagctctgccggtttggttaaaccttagtatttgcttggttaaggttgatggatga
cggcccggagtttttactattcatcgacacagtaaaagctactacatactgtctgcaagt
tttttagtcttggtcaagtgagagatgtggagaacgaatgagaaaaaaaatctgttcttg
gtcgtggtactagctgtgtaaatgttgcctggaggagttgcagatgatcctgtcagttga
gtaatcacggtgtgggagaattgttaagagcggcagtaatgtttctggagtgtgcattgg
ctgctgtctgtatgtactaggcagctgcaggagtggcggactagggagctttgcaggcca
cagtagctagctattactcctcacccctgctttctcgccatccctccctgaaaccggcag
ttatgaatgctgcatggcaatgaattagagcagctaaccacctccgagaacaaggcatcg
acctggttgccccatctggtatggccaaatcactgttctgcatgtagcaagacactgact
gaaaacctctgtgtgatctactgtgtcagatactcagattagcatacttagttggttacc
agtgcctgtttgttgcttgattagttgattgatctttccctttcaatgttccaactgatt
gatgttgccatgagctaacgaaattaaagatctgatcttttttcctctctctgcgtggca
tggaatccatggctgcgatggaaaagcaggtggcattatgagagtgtgtggaggtgcggg
atgggcgatggcctgcgcag
>Pgl_GLEAN_10015816 PgMYB122
ctgttggagggggtcgatggaaaatgaaaaggaggggagacagcgggtcaccttgccgca
ggcctctaccgtgtggaattgggtctagaggtattccattgagtagaacactcgaagtgg
atgaggtgagcagggccgatatccacttgcgccaccgcgtcgggaatcccctgtgttcca
tcagggagatgaggcagtcccaataaaccgagtcaaaagctttggagatatctagcttta
acagcagcgtcagtgtcttcgttctgtggaaccttctggtgaggttgcgcacatatagaa
agttgtcatgaatgcttcgcttcttgatgaaggcgctctggcaaggggagattaggccat
ccatgagtgggacgaggcgcagtgccaggagtttggtaattatttttgcgatcgcatgga
ttagacttatcggagggaagtcagcaatgtcctcaactccatctttttttggaagaagaa
cgatgttcaccttattgagcagactcaagtcccggcatctgttgttaaagacggagttta
tcagagcggagacatcgatagttgtgaggcagttggcaaattgcatgccatatttcctcg
tcgctgaagggtgtgtcaagtgaggagaggtccggcgcggagaggtttaagttcggtcag
gagtagtggcgggagtgtggtagtggggtggccatgaccttgttaaagtgctcttgcaca
acccgctttttgtcgtcgtggctgaaaaggtaacccccctggtggcgaaggcagtggatg
aagttcttccgccgtctgccattagcccttagctggaagaagcgggtgtttgtgtcgcct
tcccgaatggtggagattctagttgactgcttcttgcgagctttctcaatgatcagccag
ctgattattcttgagtatcgtgtttatatttccacggggaagtactgatagagtaatagt
gtagatgatcagtaaataagtcttatgaatacaccataatttgatagattgcaaccttgc
agggataacttcattattaagggcatggaaattaattgcagtgtcaaatagagcatggca
gttcatcatgatgtcatcttggacgcatatgagccgccattaccatgtcctgtgtgacag
ccgccatcagagcacaacagcaataagaccacatgtagaatgtgtgtacttactacaaaa
tgtcagcattattccatccttgtgcgtatggtatgacaggacccctaaactgctagttac
acctctctaactaaaaactggtacgcacgggactctgcaaaaggtcacatgcagccccgc
atacacgcatgcgcacatcgatagattcctgcctttagctgttgtttccactagcaggaa
tgtttttcatctgcagagagctaatctggtatacttataatctgcatctggccaagaccc
aaccatactttaatctgcctctgcttacggatccactactgctaacaaattaaggcatca
agcacgtcctcgcgaaatttggtattgctaccatatttttttctacagttctaggaacaa
aacgaaatggttccgtaaacactgcaaatcacaggacctgaaagtttaggcatcaagcac
gtcctcacgagcacatatcctgtcataagggaagcacagaagttcgcagcgcgaaattct
gagaattccaccaagaagtctcgaggaattctactggcagtgacatattaagtaatagat
aacttataaatacagccgaatggacattggaaatacaatatgatacacagaatttgaaac
tgatccgatgaggagtgtgtgcttccacatcttctcccacgtggcatgtggatgcttgtt
atcgctcgtgcagctcagagtaccggcaaaggcgtggcattgtgtatatatatatatatg
tataaaatgatccaaaccttgtagtagacatacaaaaccttatctacagatccctatctc
actcacacgcacataaagcc
>Pgl_GLEAN_10035466 PgMYB115
aggttactgtaggggtggcctacgtatctgtaacgggcgttaattaagctcgttacaaac
acagtccactaagtaacgggcttcaattggagcacccgttacaaacttgccaacaaagta
acgggcaccgtaaaagcccgttaccaatacgttgtctgttcgttgagacatcgaagacac
aggttcaccacatgcgtttatgatattgatttcacagtaacgggctttgttttggtgccc
gttaccaaagttccctgtgggcctagagaaacagtaattttcacgtgaccggtggctagt
tgtggtaacggtcgttgtttaatgcccgttacgaatatgtcttatcagtaacgggcatct
gcccgttacctttcttggcttatttgtaacagatctacgcccgttaccaaagccagtttt
tcacgtagtgttcgaagtttgaaacaaaattggccatatcactggagggaaatgaaaaat
atttgaaatgaaaaaacacatatttcgtttatgccaccaagatacaacatccaataatac
ccctatacaaccaatgtataccaccttgtgatggtctaaaattaatcttactcgtcagat
cttttgtactggtcctttcctaacagtggtatatggtggtatgatccaccgtaaaagagc
cccccactaatggataaattgggtgaaaagtgcattcaaggctttgcaagagaaatttgg
aatccctcggaccaaaataattttcagcatatgattcatcctgtagtgtgaagtttcgtt
gttccgacgggtgctcaaatgtgaacagaacatccatattccccaaatgatagacaatgg
ggcactatcgaccacacaatgcctttttgcacgtacatatatatgatccagcttatatac
ttaaatttgctatctaacaaatcatataaacaaatagatcttctaccaaagatggcatca
ctaacaacctgtcactaatttcttcatgtttttcttttctttgtggtagttttgcttttt
tgttaaaaagagaaggggtctggtgcttgagagtgaagaaggagagagcttgcagttggt
aacagtggtgtggtgtggctcgtgtcgacgtcccaatccgaccgagcgtagttgtttgaa
ttgttcaggccggtgcgtgttgatgtcccactccaaccgaccgagtcacttcagttgagt
tgtgcgctgcggctttcatgacccaatccaagtcaccggagttgttggtctgcagactag
agttgttcggggtttctacccttttgagttgtatggtcttttggccttgaattgtgaggg
atggtgtttgcctccctagttgtacggtcttcggaccggagttgtacggtttttggccgg
tttttcttataaaccggtcaactttcttctaataaaaattcggaaaagcgtaagttatct
ctgtcccttaaaaaaattctccaatatttggccgagaaatacataccgactttagtgatt
tactatataggctacctgcaacaaacacggctgattccatgtgcaagtgtactttgtttt
cagaaagacagtgtagtggtggggcaagcctctcttattattacgaaagtaatgaacctt
ttttccctggtggtgagatttgaaggggccaaccatcaagcagaggtcattgcaacagca
acaacaaaaaaaaaatctcctacacattgacttcttatcctctccctctctctcccaacc
caacctgactgtctctctcatcaatcttatatattttttgtgcgccttgttgccttgtgc
tctctgccctttccctccttgctttctgtgcctctgaagatcagtgtttctatatatgtc
atctagctagatagcacagagcaagctgcctgcccaggcagctagaaaattagcaaaaag
attgggagcagtgggattcggtagctaggtgttgcttttagctccgtttgcgggggcata
tctcgctttgttgcgacctc
>Pgl_GLEAN_10011393 PgMYB116
tgccgtcagcaatgaaaagttttattaagttcatcaaatcctgggggtcctagatatcaa
ttttgtgacaagcctgtgaaacattggaacctgactactaacattccttgctctaaatag
gataggtcagcataagttggatttataggtcagttttgcttctttcatgattttgtttgc
tcaaaataagttgcatctcttggagttcattgtgaaaatcacaattattttgagctgaat
catggttggagctctaatttaggagttaatataaggctttttagttgcacagacaactgc
taatttgaaattgtaggtcatgtgtgttatgattttgtgaggttcaatcacttgtaattg
tggaaataatgaaaatacttttgttttgtacccatgagaatgacagttaggtatgcagag
ctgaaaacctgaaatgttgatcgtgatgtatgtacggctgatggctaattcctgacggta
tcataagcaggtgatggtcacaatttgtttggtatgtagaatatctgaaagttggatccc
ttccattgatctttcagctgagctcatgtctcaacataatttgttattggatagctggag
cattagatcttgccctgcaaggtaccattataattggaatcattccaaatttgatgttaa
tcatatcaaattgttacttctgaatgtctactatctagaatcatgtatattgcataatca
ttattagaatatgtgggggggggggagttactattacatgctcaatgcctattaaacttt
gtaatttcttagacaactgtacatagttagatactaatttcagttttgcttaatttgtat
ttcaataggggttaacaagctctgattatttagttcccccctcttcactcccttttccta
caattttgtaatgtgttgcaccttattgtttttctccaagtgcttactatgaagtatgtc
tgtgttggtttgctcagagtataaaatctggaaagatatttaaatgttgaaatttcatag
ggatcaatttcattcattaggcatgatgctaccatcaaagatgaaagagctcaagatcta
aaaagaaaggagataagtgcattgtcctgcaaggagaatgcccagattatgagaaatgtc
ctgccgctgcatttacatatggaatcaaagggagatcaatggaatgtttgaaggcatgat
ggacgagtgatataattttaaatcagcgtatagttttaggtggatcatccatatgagtga
agtgaatcagtggtttgaagatatataaagtagtgccatattattcaccttacactattc
tttaccacggattcctattttcttagtgaattacatcagtaattaaaaatgatgcttgta
tttagtctgttcagtgagtaaaactgcaaaaaaccaactctgatggtgtccttatggttt
ttgaagtgccaatgattccactcattgcaggtttactttgcagtttttcatttcatatta
gttaatttggtgtaatttatcgaattatgatgtaagcccgtagcaacgcacgagcacgat
cctagtaacgattaaaataattaatcaatcaacctcgtctggcaaccgcctcatcctaat
ctttccacgggcgtattggcggtgggagcagttgcagtgtcccgttgggcctgccaggac
aacagaggagaggagttacccgcgaaaaaaaaaggacaacagaggagagaaaccggcggc
atcctctagttagaagtgaccctccgatctcgatccgacagctggcatccgcactgacca
ccgggccccacgcgacagcatctcttcctcccactactcctatattgtcgggtgactggc
gttcgtggccatggggctcgagggtgccttcgtgtgctcattcgaacgcggcaaggagcg
ggagagagggaggagtgggcacggcgaggagagagaccccccactggcatggtcgcggtg
gccggcggcggtcgcggacg
>Pgl_GLEAN_10010676 PgMYB118
ctgatcagcaatggccaatgggcatgcaggctgcagcatttttcaaaggtctgactttcc
ttttctttttcttttttttttgaaacgaaagatctgactttcacgtgtgctgttaatcag
gtccccaaagcttgttcatgggcactgaccatccattgagtcgttagcgttttattttta
gtcctctagttagttgagcaactgacacaaattgtgatcgggaaaaaaaagcatgtacct
tcccgtagggtcagggcgtttgtaggctgacaatgcctgctagccggttcgatcgagact
tggactggcgatcgaccactaagaccatatctgcaatgcaggcatttcgtagaaagccaa
ttggaattcctgtgttcggaattcttgactaaatgttagtaaaagttaaagcactacaat
gcaaggcgaaactatatatagcatgtaaatcttggataacaattgtgggagtaatcatgc
atggaagatttagaagaaaatatgtagaaacagatgatgccgcagagatgattctctcca
tctctgaagctttataacaggtttatgtagtgagaaaagaccatacatacaaactaaatc
aaacagtatgtcgtgttcaagattaaaaaaagcaccaatgtgccgggagagagacttgtg
caaagagctaggatcaaaggatgcaagtggggaagtcagctgaggctgctgcctttaggg
gttgggagggtgggacaggtgatccgaagaaatctatcttatgctattgcgtgcatgggc
ctccaacccaaagcattgcatggatggaaacaatctgtcactgacgcaacgcacataacc
attttgcaaacaaagcgatggagaggggaggaaaatctttggatttgatgggagctgagc
tgctgaccttggagtattagggccccccctcctctctaaccgagcaagacgaggacaacc
cgaggaaaagccctttgagagttccttcaccctgactccaactctccaggtatccctgag
cacaaggccaagcagctacatgacaatcccgcatgatctcagccaatcatttttttatat
gttgcgcgcgctattattgtgctgcgtgtgtgtggaatgcgaagttgtcatctagttctg
ctgttctgcataccaacctagccaaaccatccatgcatatcttggaccatgcatgcaagg
cgtatttgcttgtggcatgttcatacatgtgtttttaaataaaagaagcatgcatgcaaa
aatattctatgcaaaaatatttgcttgtaccacatgactgtctaggagcctgataatgta
gccttatatactgaagaacttactgtagcaagttcagaaacaaaaagtgtgatccagtta
aacatttcttgttacagagagggtggtgctgccaatagacctggacaacttctttgcttg
gaacaagtgagaattctgtgtgctaaatatgtgcatcaggggagagtagaagcttcttgc
ttgtgacttatggagacaacaattgtactacattactactatatcacctcgcagtactct
tctaccggtacttacttactcatatataagtatataactgtctggattctgagcaagtca
gcacgaacaagtgcacacattattctatcatatttcatatagacctcaatttctttcagc
acgacaagaaccatgactctatacgtctctacctgaaaccatcctcttgcgttgcgtgcg
tagactgacaagtctctatctcttgtgcacacaacacaaacacacatacctcagcacggc
gacgacggcaaaaacccatgctgcacattaacaacaagaagagacagagaccacacagct
agtggaggggacaaacaacggtcgcaggcgccagcagccagtatataagcaggctctgcc
cggtggccactacttgctcaaggcaccgagccattcattcatcagcatcgacgttcagtt
gggtttgcagttggagttcc
>Pgl_GLEAN_10026254 PgMYB108
cataggctgacacacacgttacaccgtgccggtcataatgatttacatgtaaattttatg
aataaaataaataagaagtttgtaaaatattatataatttatgtaaatatatagttttga
gaggactgtttttgagaagttagaacacaaagtcgtttgtaacttaacaaaatttgaggg
aaaatattgaattatataatttataaatgaaataggaatacataattttaaaaaaatcct
tgttaagatcttttccgcttacaggatgagaaaacataaatttttaaccatgaatcccat
aatagaattgtgagccccacaaaccaaaatgtgtgggtcccacctgatgtgggtcccaca
cgaatatctcatgaatccacgtgggtcccacacgtgggtcccacctaaacatactgtgga
tctcacatgaacagtatcagtggcatgtggatgatcctagccatcaatacgtgatccaac
gtctcagcttttctcgatgatgtggcgcaatgggagggcaaaatcccccccccccacttt
atgtcttgtaaagatttatgttgatagggaaagtagacaattcacttgtacttcaagcct
ccaacaaacactactactactatcacagtagtgcatcgaagtaccattgtttcaggggtg
tagtcgaagtactacaactatacaattccatcaggttgaccatcatcatcaatataatct
aaaaagaactttgaatatcctacagctaaaagaagccaaatgttatcgtcgtcggtccgg
tatcggaccgaaaccctgccccctcgcgctcgccctccctctccccggcgcgtcctccac
tccctccctttcctccgccgcgtcctccaatcccgcaaaaaaaactgcgccctaactcgg
cctcgcctccgcacgcgccaccacgactccactcccgtnnnnnnnnnnnnnnnnnnnnnn
nnnnnnnnnnnnnnnnnnnnnnnnnnnnnnnnnnnnnnnnnnnnnnnnnnnnnnnnnnnn
nnnnnnnnnnnnnnnnnnnnnnnnnnnnnnnnnnnnnnnnnnnnnnnnnnnnnnnnnnnn
nnnnnnnnnnnnnnnnnnnnnnnnnnnnnnnnnnnnnnnnnnnnnnnnnnnnnnnnnnnn
nnnnnnnnnnnnnnnnnnnnnnnnnnnnnnnnnnnnnnnnnnnnnnnnnnnnnnnnnnnn
nnnnnnnnnnnnnnnnnnnnnnnnnnnnnnnnnnnnnnnnnnnnnnnnnnnnnnnnnnnn
nnnnnnnnnnnnnnnnnnnnnnnnnnnnnnnnnnnnnnnnnnnnnnnnnnnnnnnnnnnn
nnnnnnnnnnnnnnnnnnnnnnnnnnnnnnnnnnnnnnnnnnnnnnnnnnnnnnnnnnnn
nnnnnnnnnnnnnnnnnnnnnnnnnnnnnnnnnnnnnnnnnnnnnnnnnnnnnnnnnnnn
nnnnnnnnnnnnnnnnnnnnnnnnnnnnnnnnnnnnnnnnnnnnnnnnnnnnnnnnnnnn
nnnnnnnnnnnnnnnnnnnnnnnnnnnnnnnnnnnnnnnnnnnnnnnnnnnnnnnnnnnn
nnnnnnnnnnnnnnnnnnnnnnnnnnnnnnnnnnnnnnnnnnnnnnnnnnnnnnnnnnnn
nnnnnnnnnnnnnnnnnnnnnnnnnnnnnnnnnnnnnnnnnnnnnnnnnnnnnnnnnnnn
nnnnnnnnnnnnnnnnnnnnnnnnnnnnnnnnnnnnnnnnnnnnnnnnnnnnnnnnnnnn
nnnnnnnnnnnnnnnnnnnnnnnnnnnnnnnnnnnnnnnnnnnnngacccacgccgtccg
tcgcggcacctcgctccaatcaccgcggcccgcatcgcggatcccggtcggatcgatctg
cctacgcgcccctgttttggatcgacgcagagagaaaattaagagccttccgcggcgatt
ttgcaagggatttggaagcaaggggtggattacttacctccgctgacgctctctaggttt
tgaggatgagattcgggagg
>Pgl_GLEAN_10031352 PgMYB114
cctgctaaactcatagtacatttttaagatgcccataatcgcaggtcgagtgtcttagtc
atccatccatgcataaccccagcacagaattatatattgacatgacaaaaaagttgaaaa
aaaaacgaaacagtgaggtcacacgcggctctgggatgaacaagtcttgagggtcaaaac
agatgacaccatgcatccaggccagggatactgctgcagtgtcagttgcaactgcccatg
gacttttggcaggtcagcctagctaatggggcccccaacgttggtttggtgattcacctc
ctttccccatggtccaccctaagttagggttcttgacttgggatcaaggtacagagccgt
aactgaattggaaggactcggactggtcatcctgaccgtgttacctctggtacatctatg
tacgcggcgatcgtagggtacgcttgctgtcaaagtactggtactcgaattattggtgat
gttattcccttaccaatttgagaggaaccttgatgacggtgtatgaagacttaatttgca
tgtcccgtactacagatccaaatatagtgtacgtatgcgcagattagatatattcaggtt
tggaattgaccaccgttgaacctgatgaagtgtttactgatggttaccgggaatgggagc
tgatgatggccaatttggattactgccttgactacgatggccaatttggcggttacatta
gtctggttgatagttctcagtcatcagtctttcccaaacgtgtcagtacttttctccttt
ttttccataagcatagtaatttaatgaattaaaagagtgatgctttgctttgcagtgaaa
agaagcaattttgtcagagatcgtgaacttttgcagaaactatctggcgctaagcgaaaa
ccttccaaaattcgaagcacgctccttcaagtatagctgatcgagttggggcctctctgc
ttgagctctggtttcatcatgtccaatgattaacccaatgccattgtccgtcatggttat
cccattgcagtgattctaatggatggatgaagacaagaagtaggaattgtgcgttgcact
gcgctcctatatatccgttgacacgttccattgattcagtaaaggcgccaattctagctg
ctagaacctaattaaatcctacgtaaatttaactatgttcacaggagttagcccagtttc
aacgtacaggtggtgtaccagcttcgtcgtctcaccgtcaccactcaccaccctagttcc
agcgtagtaagctgatctctatgcattggtcgtcaagctatggtgactgcagagtactaa
ctgttcatcgtggctcgtgcactccgccactccctcatctatcctatattagatcctaaa
tgtgtttgtaagcacagtgcaacttcctattgaacagagtatgaagttcggctagtaagg
tagtaaaaaaaataaaaaaaatgcaacaaatttgtgtgaagatgctgaaataacaaacca
acttgttcaaataactccgtatctaaattaatcttttggggagagtatatttaagtatac
gtccagcagctgaaatcgttaggtgtaacagtgctgctgagacacaaatccatgtttcag
gaagcaggatgcatggcacagaagttcagcaaagcacagatcatagcaacacaccctttt
ctgcagcagagctgagcagggcaatagacaagtagtagtagcatatagggtggccaggga
aacaaaaagcactctccaaagtacgcccaaacaaaagcttgtgtcagcatcaaggtcaaa
ccatatccgtactttctttaagccctctggcctgctcctataaatcctgggcacatacca
ccccacgagcaaaccagcagctagctcgagctcatcacgcacagcaccacacacctcata
cacacacaggtaggtagacagacagacagacagagacccaaagctcaggaggagtagaga
gctgggaaagagaggaggag
>Pgl_GLEAN_10037578 PgMYB119
gcgaccgggatctacagcacggctggacgggagacggcggcgctccctgcctccccttct
cctgctccggtggcgtggggctccagccgacgatggggcagctccacgatgggggtctca
tgtggcaactttgacaacggtagaaggaacaaaataatcaagcacatatgagaatattcc
tagtaggcatgggctatccaagatgccgaagtgtataggtaccacgtggtataaaccaga
aaaaatctcttgttttgagacatataaccgaagttagctctatattactatttattttgt
ctttattaaaaagctacgcaaaccaattaaattgatatagaaaaggttgtactgtctaca
gtggtgttcttcgggcgcagaactctactatcgcttcaaagtagttgatttaatactgaa
atatgcatgcaataattgtatgtatgtaaagttgctcaccaaatctccaccacattttaa
tgtagaaatggaataatgctgattaaagagtatgcttgtggtgtcatttttgttatgaac
attcaaaatcttttttcaaatgtgagtatgttggtaattaagctgtcgatctgacacata
ctactagcatttcttagaaaaactactagaagaaattaatttgttaactagttccaagca
catccttttctcataattacgagtgtatacaatcttagcatatattatggaccagcacat
atctttctgcaagcagcagacgcactacaaataaagtatcaagtcatcatgttgcatttg
ttacttcatatctgccatacacaacgaactgtgagcaacatggattcttgaatgcatccc
cattgtgcatagcatcccatgctccaagactgctaatatggggcatctggtcaggatgca
accaaccaccttctgtgaatgctagctcagtagtcattactaggctttctgtttttgtaa
tggttgcaatggtagagctagaacggtctaccttttgggggtgaactgaaatgttgacca
tcacaaccttttctcctacggaatttctttcatgtattttttctaaaatgacctgaatca
tgtttgaatagtggatcgaccataataaacagggacacaatgaagttaatgtaataatta
catcatcttaaaatgagtatcttgtaatgaacaataatatgtaaacaaagaagaaacaaa
atgttctctcaaacaaaaggaagaaacaaaatggacctaattattatatagggcaatacc
acatatacaattaacttactaggcttgtattgtatattaggaaaggggtgctcactggat
ttggcctctggttgtccgagccatgacaatattctttcttgaattacttcaattactgtg
tcataactttgattcatgatacaaattaatcccaccagtttacagtcttttattttctat
atacattggcaacatctgcgtacaacatatatgtgtgttgtatcattaagactatttaaa
aatgctgatggtatctttctttgaggagaatattgttagggaagttagctaagagaagta
caatagagaagctggtaacgggataggtttgtgtttgctgagaaccgtgagaagagtggt
ctttggcaaatagccaaacagcagaggcaagttggtgaaagagagcgatgacatgttgac
acattattgcataagcataccacagctagccctcttgacgtgtaaaactaaactaaaggg
acctttcatcaaagccctagaggctatctcaaccaatgtgtgtacaagggtatatatgac
aaacaccctggccttctctctcgcacacattagctctcacatctatccctcttatctcct
acagaccctagctttgacttgtctgtagacaatagctaactcgatcatacacacaactgt
tctcgtcttccttcatcgaatttaacacatcgaagctcgctaacgccaggcatcacgttt
cttgttcgtgcgtgggagag
>Pgl_GLEAN_10007729 PgMYB107
aagctctggatcgacgaacgacgctgcgcgtcgtctcaagtcagctgtaccagcagaaga
gaaatgatgagccattgtccaaaactaaggtcagctgaggcagccagcctgcaggatcac
aggagaaagaaaaaaaaaagttaaaagctttgctgctcgcagtctcagctgctggctcca
gcagctctagagggtcgcccctttccaaggaccgtcttgtgctggtgtgtgtgcgtgcag
tgaactggtaagatctttttcctgtgcctctgataatggctgacacaaaaggaggatgga
gtcctctgtgccaatgataatgggtggcagaaaggctagtgcttttcacatcaggacagc
agcaaaaaaaaatgtggaagaaaccagatggggactttagcgagatgctctcttcttttc
gagtagtaagagcccagttcaattgctagaatacaccagctgctttgactactgcaaagt
gaaattctactgtaaatcactccatacttagcatatccaaacaatccaagtttatggagt
tgcaagcaacagccagcaggtgattgtgtgctatgacctccagtatgacatgtgcattgc
taacaaagtccgcatcgatgtcatgtataacaccaaaaacaaaaaacccacggaactcag
atatgtgaccaaagactcaacaaatcggacagcatctgaattgaacaactcagaaatcat
gtattgaatcgaactcagaaatcatataaggaacggatggtagggttttcttctgtaggt
tgaacttcacagtggcaaacatgactgtatccataactgttgcattgaaaacgaaaataa
acctccagcatatcaagcactttatgtatctatccgaactaatgatggcgtatacttcat
ttgattgatcaatggaaatatgctgccatttctaattaaactatgcaatcatagtggacc
atcaaggcaccggaaagttgataagcacaaccacttctcttttctcgagaaacaaaagaa
agtcatattaaagaggaaagagaaaggaaacaaaaggaagaagaatataccttcataaca
caatatgagtattgtgctggaatataaaattagaaaaaaaaatctggacagcgccattgt
acaggcatccaagctggtattggctcaagctggtatttagtttaagagttgctttgggag
agagaaaaaactgtcggggtctggcaagggcagataaaaccatttaactgatactcaata
ccaatgaacatgtttcatctcaatgaacccggacagtgttctgtatactggtcctgccgc
tagtagtaactgataattattagacagtaaaaattagtgcaaagctttgagcatataaag
gatggatacagcttgtagtatggggtggggcaaagatttatgattaaacccaaaggacta
gtttcaagtagaaatttgaataaggcatatatgaacaataattttgaaatgcggtcaaaa
ttttatttgcatgatgcactagcattcatgtgtacttaacagaaagcaataatataccac
ttctccagaagccaataaagtgaatgtcctaacttgcacacctatggatttgcaatacaa
tatgcgcagcatgagccaattaaaaagctactttatcagttggaatctgagggcaaccca
aatggtggaatataggatccttagggagctccaaatcacacccaccacatcacctggcca
ccaagacctcccctctcttacctataaatgagaggcaaaagccaccaaactagaaggcaa
ctaggacaaagtggcataccttctctgtactagctttcttcctcctctcttcctcccaaa
cagactggagttcatcaaggtcacactgaaactggagccaacaagcatacagagaaagaa
gagcaagaagaccggctcccagccgatacaaggtaggagcgagcagcgttaggtcagtgt
catcatatcacagggttgat
>Pgl_GLEAN_10033016 PgMYB124
tgatgtgtactccagaaaaaaaacactctccggtgggcagtggcttggaggtgtggatga
gtggatgatgggaagcctttggaagattgttgtttcctagctgatcagctttcaccctgt
cgtgaagcaacggctctccttgcgcactattattacgtcctactaatgtcaaagcttcgg
tcgtggccggtactacgtaatagtgcacaactgacaagtgagacaaaagccaaatgtttg
gtgatcgagcaaaattcacgaaacaaagaaaaatgtgtggttagttatgtgacatacagt
gaagaaagagaaaatgtttggattctgccaactaaagtttaggttcgacgttcaaacggg
ttcttagctgaagtccagccagctagactttagttgatgatgagatccaaacatgacaaa
atagctctgaattaatagaaattatagattaaaaacactttgcacgcaatataaatatgg
atctatattttccatatacatccatcatgaaaagcaatggatagtccatagacaaaattt
tttaaataaaatgcaggagaaacataattgtgatgacatgccctaattaatcatgcattg
gaacctgaaaagagacatcaaataagcatttgattggcttcatgcacttatcaatgcaat
atttttttgtggtgttaatttaatgagaagaacatttaatacaagctaaaaacactcttt
gtgggaagggagtaaaaattaggtacaatataaattgccataagaattttatagttgcac
tcatagtcacataattcggggtcgctgccgcgttcctcgacccgggttcactgtaccaaa
tcatgggtcggggtcaaccggggtcatcgtcccattcacgcatgggtcatcgatccacaa
cagtagggtcacaacatggatcaagtaggttgtattgagcaacaagggagggaagatgaa
aaaagagtgccattgttaagataatggacttacgatacgaggaatagtgggctcggtgat
ccatcatacacaacccaaatcagatttttcttgatattttttcctatttaataggttgaa
tagaactttagtatcataatcatagttcatcgacccgggtttatcgaccgtgattgattg
gggtcaatcgttccaaactactcccttcgacccatgttctcagacacttacgaccctcgt
ccctcgaccccgaccctcaatccagtcgacccgacattccggtgactatggttgcacttg
ctcttgcactaacaattatcgagggttcaatttttttactagcaatgcattattaaatat
cattattatacataatcaattactacggtataaatgccggactcaccaccagtatagctg
aaaacaggacacgaaccgatggcaaggcaaaacctgccaagtagctgcacctaccctcaa
gctgggcacaaccacacggtacagctaacaagcgcccccttgcccaaaacaaactgatga
aaagcaaaaaaccagaaaaaaagagagagaagcagcaataaaagaatcggaaagggaata
ggacaaagggcactcaagcgaagcacacctacctaccaaatccagcgccccccctcctcc
tcctcccctctcgcaaccaaccactcgccccggccccaccacaccctcccgctcccccct
ccgnnnnnnnnnnnnnnnnnnnnnnnnnnnnnnnnnnnnnnnnnnnnnnnnnnnnnnnnn
nnnnnnnnnnnnnnnnnnnnnnnnnnnnnnnnnnnnnnnnnnnnnnnnnnnnnnnnnnnn
nnnnnnnnnnnnnnnnnnnnnnnnnnnngcgctgcgctcgctgcagaaactccatcgccg
cccaccaccaagcaacgcgcgcgcctggcctgcccccctcgtcttcttcacgggcggcgg
cggcggcggccggactccactccgcgagccggagcaggatcgaaggaggaggtaggatct
gtctgcggcggccgggcggc
>Pgl_GLEAN_10034301 PgMYB120
tgctgctgctgctctgctcagctcgtcatcaacttcgcttctgcacggccgggggcaaac
acgcgcgcgtaacggggccctaactcttttactgggcggctggggtggtgatcgtgtgaa
ctcgatcgaggtcgagatcgtgaactcgtgatctgcaacgtgtagtggatggaacggaac
agtgagctagaatcaagtcaagccatggcgtacagtgccgccgggcgggcaccggcgccc
gccgccatgcgaatcatcgccgcgcgtcgccatgcgaatcatcttggaaatggcccgcca
ccttggtaggttgggtacgaaatccggccggccgcacgggggaactaccagcttgttgaa
gccataggttgatccagcaggcccaaagatttcgtccatcagcaattaaggattgttgtt
gcattgttggtgctaacttgaacgtgcacgttgccaatgacccccggttcaagttggaga
tgaaagaccgggacaccaacaaacaaaacgtgtggaagtgaaggccgggtttggtgaaat
cccatcgtgcaaaagtggtttggtggcaggcgtgcttttaaatttaacgtccgactgttt
gacccaaatcaatcgaaacccccaaaaacgttagaatttagaggagagaggaaaacgaaa
gtctagtgaccctgtttttcttaaacatgtgccgccccccatgctgttgttgatgtggtg
tcgtcacgctcacggtcacagtcgatcaacatttataggttccgttatgttgaacggcaa
ctattcctatttctgagcggtcccgaacggtctcctcacaaattttctgaacggtctgtt
ccacggtaacccaacggagccggctgtaatccggtcgggaccttaaaaatccgggaaaag
ggtaaatgtgtcagtcagcggcgtggtcaactgcaaaagttacgcgttgttacgggtgag
cccccgtacgtgctaagtacggtcacaaagatattaggaaatgtattcgccggaaatgta
cgtgctgtatacgtacggggcacatgggttcgcatcggcggcgcggcacaccgccggaag
gcctcctctctccacgacgcatggaaatcaatcggactgagtaaaacgcatcgtcagatc
agaaagattgcagtaatcccaatgattttacctactagtcggtccgatggttttgttcga
tcgatgacataaggttagttttgaaatggagcaagagcggcgccgatcgacgccgccgct
gccgccgccgccgcagcagctgcgaagttgaattggaggaagcggcgaacagcggcgagc
cggtgcagtccagtccggtcagtccaatccaatccagcctcggtggaggaagaagctaga
gattccccggcacgagcacgtagataggcatgcgtacgtcaccgccgccgccacacgtgc
cgccttcccatagcccctccggccgacgtcgtccatggctttgcacctgccgtctcgctg
ggcgtgcccaccgcccgtgagtgtcatgggcggcctagcctagccgagcctccttcctcc
tcggccacctcgtcaccacccctctcgcgagaccggacaccacgcgnnnnnnnnnnnnnn
nnnnnnnnnnnnnnnnnnnnnnnnnnnnnnnnnnnnnnnnnnnnnnnnnnnnnnnnnnnn
nnnnnnnnnnnnnnnnnnnnnnnnnnctttccctcttccgttccagacctctgcctacca
ctaccagcaacccaccaactcgtcatccccttcccattccctctcaccgcgcgcacccca
cccaacccaaccaaccaacccgcccgcctcccgcctcctataaaacctccggcggccggc
gccctcccgtccgcactccgcctcctcccttcctctcttccaaaacccaaatcgccgccg
ccgaacgcccacagcgcagccgcggcgcccaaccaaccaaccacacacaccccaccacac
ctctccgtccgctcctcgcc
>Pgl_GLEAN_10030833 PgMYB117
gtagagatagttttttttagaattaccagtagagatagtagatgtatatttctccagcaa
ttgatagccacaataacattggcctcacgacggcacgggggctcctatataccttccgga
aggtgcatgaggatgtgaactataaagtccatgaaagcccaaaacaaccccttaactaat
ttagttcctcaattctctcacaggcttatctttattattttttataaatactttttttga
actgtttgcaatattttatcactcaacatttttcggaaatgttgccaatattttttggaa
gtgttgccaacattttttcgtcaaatatttttctagagtattaccaacatttttccccga
catttttgggagttgcttacatttgttcatcaacatttattggaagtattgcaaatattt
ttctcgtcaacattttttagaagtggtgccaacattttttcaacatttttcggaagtgtt
aacaacattttttcgtcaatattttccacaactgttgccaacattttttgggagtgtcag
cattttttcttcaacatttttcgaaagttttgccaacatttttccgtcagcatttttcgg
aagtgttgccaacatcttttcgtcaacatttttcgttgtgttgtttgcattttttcgtca
acactttcggaagtgttgtgaacatttttcagaagtgttgccaacatttttcgtcaaaat
ttttcggaagtgtgtttaaaaagaagttgatcgatattttttgaatcaacattttctcta
aaatgttgaaacaatagttttccacattttcttaaaaatgttgatccaacatttctcaaa
aacatagactttcaaccatttataaaaatgttgactcaacatttaagtattttcaaaaaa
tgttggaccaatatttctccgaaatttaaaaaaataaaaaaagttggaatgtcacctcca
actctggtggccggcgagggtggtggcatggcagccagctgattagcaagccacgacgcg
gcgtgcgggacacagggaacgggatgcgccgacaggccacggcggcgcggggtagnnnnn
nnnnnnnnnnnnnnnnnnnnnnnnnnnnnnnnnnnnnnnnnnnnnnnnnnnnnnnnnnnn
nnnnnnnnnnnnnnnnnnnnnnnnnnnnnnnnnnnnnnnnnnnnnnnnnnnnnnnnnnnn
nnnnnnnnnnnnnnnnnnnnnnnnnnnnnnnnnnnnnnnnnnnnnnnnnnnnnnnnnnnn
nnnnnnnnnnnnnnnnnnnnnnnnnnnnnnnnnnnnnnnnnnnnnnnnnnnnnnnnnnna
gcgcgtggcgaagccgacgacaggcggcttcggggatcgggtcggaggaagaatacggtg
gtgctagggttcaagttgttgggctgggtattattggactttatagttcatttgctttct
aacttccggaagatatatacgagttccgcgacggcaccgcctcgagacccacatatgggt
ggtaaatggtcatggccctaatgcatcattcacaatccaactagatcgttttatttttta
ttcaaaattgaatagaattatgacccgatctttataaggtccgatcaaaatggaagacct
gttaccacccctgggcccacgacgaccgcccagcgagcacagcctctctgaaaagccgga
gtcaaagaaccgacccgagcaggtatcgtttcgctccctcccggctccggcaccggccgc
tcctcgcatcccacccccactgccgccgccgccgtccacgccgcaccacccacaaccact
cgcgggtcgcgaccactccctccaatctccacagccgccgcggccgccgcctcgacagaa
ccctagaacccaggcggggggtaggctcgtctcgcctcgccggaggcgcgaccgcggcgg
aagccggagaccaccactccgcccctctacggaggagaagaacctggggaggaggaggct
gagggtaggagtggggaaag
>Pgl_GLEAN_10005856 PgMYB104
gccgtcggcgaatggtaggttgttttgacaaacttactgattcataattgttattatgta
tctagccatacataaatgtacttctatatgcacaacaaaagttgtgaaatttgatttgtc
ttgaaaagctgaaaatgatctccaatttggaatgaagtagaacattttgttatttattac
tgcagttttgttgcacgcaaactttttttttgactgggttattcgaaaatttcgaatcca
aatagcaattcacaggcaacaatgggcctgtttggatccatgggttagagttagttttgg
ctagtttagcaccaactaaccctgcaacatccaaacagggtgggttatattgggttagat
gcaactagctcacccaaaaaaactagcccacccaagaggtgctaattggggctagtttca
gtgggtcccacgaaaaaatctctcccgcacgcgggatcccgccgcccgcctcctcctgat
ttgtgttgtcgggatggcctggttcggcacatgacatgagagttttcaaagatgctacga
ctacttatcaacacaaatttccacatccaccaccaggtttgctactttaactagcaacaa
ttcttatccaacatgactcgttcatttaattaagtctcattgtgtgcctgttgttcacat
tatgtagggaagtactatgtggttgatgcggggtacccaaatcagccggggtacctttca
ccgtatagatgtacaaggtaccatgtggagcaatggcacaatggaccacctcccaaaggt
atgaaagaaacctttaaccatgcacacgccaaagttagaaatgtcatagagcggtctttt
ggggtgttgaagatgaaatttaggattttgttgaacgtacaaagttttccagagaaaaag
caaactagaattattgtggcttgtatggctcttcataatttcattcgagagagcagactt
gcggacagagaatttgatcgatgtgatgcagatgatgattataacccaatgcctagttct
tctccatcaacatggccagaagatgaaccttttgttgaagatgtcaacatgaatgccttc
cgtgatgagttggctcatgctttatttcatagagtgtaatgtaatggtcaagggctatgc
atcgattgtatggacaaaataatatttatggtgttttggatgcttgagttgtaaaatgat
ttatttgagttgtaaaagtagcaagtagtttataacagcacaggagcaggatgcctattt
aatattaagattatatgtcctcgaaaatttaacaccagtacttccatttcagaagtgtag
tgccagcaagtagttttttcaaaaaaaaatgaattcagcaagtagccagggagtaaaaaa
atatcacaaagagggcatggtgctactgtgctgtttaattggatgtaaacatatcgtggt
ttttgcagagctggagagttcatctttgtcagctgcaaggacaggcagatggggtaaaat
tcgtaaaaagtctcgagaatccctccacaaaaaaatcctttccgctgcaaggacaggcag
atgagttcatgatgatttctgatcggaattaggctacacgagctgcccacaaaaaaatac
tgctgaaatgatggtttgaatgctgaaataattgaaaaagtgcatttatttgtcaatcta
accatgtcatccaaacacctctagtgctagagttagtttagggatagaattagagttgga
aactaactctaactctagccctgcaagagaatccaaacagggccaatgccgataaatttg
gaaatatctccctccccgcatgccgccgccgtaaacccccagggccccacccctcggact
cgccgccccgggcgccggcgggatcctaagcctcgccggagccgcttcggccggggcccg
ggtggaagagcccggaaagcaaaccccccacacccctctccccgtagcgggggagggaga
aaactagcggcggaggcaag
>Pgl_GLEAN_10025439 PgMYB109
actcgtgcagtactatatccattgatatgatgatcaacttttttattttgccgtctcggt
ttctatttttaggtttccttctctttgtggtgagagagagagagagagagatctagagag
agagagagatgatggggtcagctagctcccttgcagaggaagaggaagcagagagggggg
ccaggtagccagacgtacactccatgcaaaggcttccacgcatgcatgttttgcagctta
ctacaacagccaggccaggcaccatcgacatcgatccgtctgttatcgcatgcacatatt
atagcgactattccgatatgctcctcgatatccctgctttaatttatgtgatgatgctag
ctagctagagattatgtgaagtcgaagcgattaagtggcttagcgagaggcatggcatgc
atggtatgcttcatggcaaaacaaccccaccacaggggcatagaggtacatatctttgtc
ccctcaactgatctcgctgccctcaggtggtcatgatagccttgtggctcaagggaactg
acaagggcaaaaaaacgagagctggagtcaaagacaagaagactatggaaatgctcccct
ctctccctgagtgtgtgttctctctctctatctttctctcatgagccatgaaaatgcttg
gttcacccgtacaagatacacaatggccacaatatatttgacacaccacatatatagtgg
agaatgtagtacaacagcgtctgcatatatgtaacatttcatgggttgttatagttgtat
acaaataataacttacaaagtggatattcatcgttactccctccattccaaatcgtaggc
cgtttcaatttttaaaaaaattcatagatatcataaacatctatataatgtaggtaggtg
caaaatcatatatatatgaaccttaaaaaaatgacctacaatttgaaacagatagagtat
ttaactccttattaatgagaagaacatttaatttaaaatcatgaatacacacatccagca
tacattattgtagtgttgtggcttgtgataaagtaaattgtctgtctagctagttaccaa
aataaaatgtgatttatttatgatcacaaatgaatttcttcttacatgctaaaagtgggg
tttgttcaatttgtcaaaaaattataccaaaataattaatctaccgcaaggcatgtgcat
tcccaaactcaaatccgcacgtatcaaaacgaagcgaattaagagcatgtttggattcca
agtgattccaagtgataacctttataaccacctatcacatctcgaacattacattggaca
ctaattaggagaatttatcatggattcattacaatcctattccataacttcccggttaat
ttgagagatgaatctattaaaactaattagatcatgattagataatgtggtactacaata
aacatgtggattaattaggtttaattgattcaccccacaaatcagcctccatatatgtaa
ttttttataattagctcgtatttagttctcctaattagttagcatccgaacactcaatgt
gacgcgtgccaaactttgccacctgtcatctaaacaccctaacaccttggcaaacttgga
catcttaggggtgccgtgtgagcatagcaaatttgctgtttgtcgatccccccctgcaac
tcccccattgtccagtttctaagcaaagcacacacacccccatcaccatcaccatcatgt
catctccttcctccctctcctccctccactcctctcttccttctcccattccccatcctc
actactagctccatacacacacacacacactctcatcatcatatataaatatacaacaca
cactcaggtccatttcctccttatcttccacaccgatcgacctcatgcacattccctagc
acactgcactactagctcctcgccagcgccgcgccgcacgtgcaagatcaagccaagatc
agaaccagctggccttagca
>Pgl_GLEAN_10015286 PgMYB105
tgtggatgaagggagttaagaagtggagtggagctaaaaaaaatacccaaatagaatgaa
aagttggagtggagtggtgtggatttggtggagtggagctattattttggaagtggagtg
ctttcaaataggccctaggagcttctccaatcggctagcaataatattactaaatttaaa
gattaaaatgctagttgaaaaacttaaaagctttctattgagagggtaaaccaacagacc
actgagctcttcatatgttgcagggagtgagtcccacatgtttgaagccatcactagcgc
acgcttctgctcgctactgttgagagttcccggcactcttcctcccacggctacgagatc
ccggtgccgtcctatacgccaccacaagctcgggacctcacactccaccgtgcaggcgac
cctccctcctttctcggtgagctctagcaaccccatacacccatcttcaattttgtgcga
ccgtgaggaaaggcgtatgggaccgtgtgattggttggcgagccaactctgctagggagg
caaagatagaaagtcaagaggtccagatacaaaacagattgctagcaggctgtgggacca
aattttgtcacaatttagatacttttggctaaccaatttattttacaaagactctctcga
agatactataagtaatgtaaagaaatcattgcaaattgtgtgtgactaactgaagttcct
ctacatatacttgtgtgccaacgtgtaaacatttctttatgaaaaaactatatgtaaaca
tatatgttaataaattcaggcttatacttctttgttccaaattattagtcattttgattt
ttttaggttcatacatttaactacgcgtctagacataataacattatatatatttttgtg
aaaaataggaatataaaaaaagtggtggactacttgcaatcagcagtaaaggtgagtgtc
aagatgtcaaatccgtgtctgcattattaaacctccgtgtcgcagcctcgcaggccaaac
ccaacggaacgacaaccacatgagttaagaggtcatataaaggtgaagaatccccagaga
agtctgggaaagaaggaaatagttcgaatccggtacaattcgattcggtccaagaatata
aatgccattatattggtttttggatgctcggtcgtcataaaatttcatcattttaaattt
tggatttgattaactgatacttttttttgtccttttgtcttgtcacatcacatagatgta
tctgtacgtttgtctcctagcctcctactacacaagatattccacgaccggaagctatac
aaggacacaaacacagattcacacgtgcacacaccactcccggcactacaaaaacattgc
atatgtcaccggtctaaccggactatgtggaggtgctgcaacgacctgtgcatgtcatgt
gtcagctctaaaggcgccaaaacgttgcatgcccctactcgagagtcgacacatgtacaa
ccgtacaacaggccaggctaagtgtgaaccaagtacagcatgcccttcgattatatcgat
ctcgatcttatctagagcaactagagcaactactctctttgacctgctaagatcatatcc
acagacgaagcataacgacacggcgaataaaagcttcttccataaccttcacaaagctct
ctctgctcctcgtggtgcggcatgcacgaaccattgcatcacccaaggcacaacctaagc
tactactccctccctagtctctataaataccatacctacagaacagttcaaattcagctt
gtggacagacggtctacttatcatagttttttcggtcgcatttcatcccaccaccgtacc
tttgtatactaaaaaaacgtcttttctgaccgcagttcagtatctatgcagcttatctga
tgagaatcgtcttttctgaccgcagttccaagctttgccagcgtatctccatcaactacc
agcaggcggaagagatcgag
>Pgl_GLEAN_10030875 PgMYB111
ttgttttccgtttctcatcgatagtatgttgttaaaccctattgatcttttcaaacaatg
tatacactatttttcttgcatttaagataaatgtaccttttttcaaatagctaatcctgg
ttttataaccaaaccatattatttgtgttgccaaaaagatctacttaattacatgaaaaa
tactagcctatttattctatgcatgtataaaaaaagaataaaaaatgttttgactattta
taagggatatctatagttcatcttttgataccaaatttttacatgtgtcatatatttaat
ttattcaaccaaactgacaatatcatgtaaggtgccagtatatgagtttacccaaataaa
tgtttgatgtacgtgttccaatgcaatacagaagaatgtgttgtatgcatgacaacaaat
aaagtcacataacgaatcatgattctggaacatactataaaagactatgtatagccaatc
atagtacaatctagaaaatgcctttcctccttgttttatgtataatgacatctcatcctc
aacaaactgaatgaaatgtcactcgtctatttgtaagaaaaatctttaaaaatgcattaa
gctatgtgtgtgctctttgggctcataatagaaatctagaatctgagttagggtacatac
tattgagaatgttatttctcatacactcttttttatcatagtttaaatacatttgcagtg
ttaattagttcaattgatacaggttagtggctgtttacatttttgctggaaccatagaac
agtgcatctctcctttttaggaaattatttgtaacatcaaattattggatatttgtatat
attgtgagataacttgttcatattatatttatatatttgttaaaatggatcacaataaat
aaatttctttgtggttaatttacagtattgtaaggttgtatgctttcctaatggtgatcg
ataattttgtttagttaaactatgcacctttaaattaacaaatacatttttagttttttt
ctttttgcaggaaaacatagtttgttacagtacttcatttggctagaatggacgaataag
gtgtgtatccacacttatatattgaggaataaccaagcaaaggtattattagcaataatg
atggctactgagatcatgcaaacatacatacaaatttgcataccaatcaagatgcctcag
tgttcatttcaaagggcgtcaacaaaaggtaggttgacatcaagatcacgcgtaatatgg
cgtcgattacataccaaactccacatttgcttgctaactaccaacaggagcacgcaaagg
cgcatatctgtgctatatgcactttcctctcttgtacaatacaaatacaatacaccctag
ctgcaacgaatctgcagcagtatctgtcatatgtagaaatattctggttagttatggtcc
catcatgcttcatatatactgataccatatttccatagcacaagtgcccatgtgtacgta
gctacaggtttgctagctgcaggtttgatgccatgtcgctgtagtgttagatagaaagca
ccaattaaagtggaaccagggtagggccctcaccatggaaatgcaatggaaggaagtgtc
atggtgaggccttgcatgcttgcttaatcaggaggatccttcaggaagcaattggaggag
aaataaattatattaatcgatgattcgattaaataatcggcgagaaggaagagtgaagga
ggcagaagctggagctagaagagaggaatgaaggggccaaggccatgggagctcatgtta
aaaggcctgctaaacaccaaccaaccatttgcacccatgatatgtcatttgcatatttgc
tagcttgatagctataacacagcttgcatcaacctataactgccgtgttggtgtgcttat
ataatagctatctgtagagagtgttaataagctagctacagctataactgctagtgaatt
tcccattgtggtgtgtgtgc
>Pgl_GLEAN_10024234 PgMYB146
ggtggccgatgctttccccttcggatgcgtccttctgctgcctccattgatccagctgag
cctgcatggcctgcagggtgtgccaagcatgctgctgagccgccggcgcggcgtgcgcga
caagtgtcggtgctggggcaggtggcgtaggaatggcttgctgcggcggcgacgtgccgg
cgatctggctttgaagcagagcgaggtagcgctcggcttgcttgatgttgaagtcgatgg
agtctggagcggtgtgcggtggaaccacgtcctgctgttgggacggctgcgcttgcgacg
aagacggacacgtctcttgctcttgctgggccgctacggtcttgcccgcgatgagatctc
ggatccttcggagagcctcgatgtcttgcgccgaagcccccagcccctcgaggctgacct
cgaacatccccgaggcggtgtgctcgacctccggagcgcttggcccggcaccggttcccg
ccgaaggctggatggccgaagccgacgggttggcgggttccggtgccagcggaggggttg
acgcctgagctgtggtggcttcggcgcctgccgatcgggtcctcaccatgtggtgttgga
ttcttccacgaggtgggcgccaaactgttggtgagaatcgggcccgaaggtggacaccga
cacaacagccccctgagagtttcccctcccttcacttgctaccacgaaggtacttctatt
actctatacgaggagaggaaacgaggaaacacttgacagtacaggaaatgacataaggaa
gcgcctagcaaaccgaagaccgagagacttgcagtggcctttggcgctctcttctcatta
cagagtgtccgtttcattacaaggggttcactatttataggagacccctgagtatgatca
tttgtctcaattacaccttttccgttcctgacaaatgctttaaacactttacaagggtat
aacagtaactccccgcgtcgtacaagcctccagcgtgtcttcgtacggccgaaacacctt
tacacgcggcgccccttgtctctgcctcgtacggtgccccctttacacgttcgcagcagc
cacgtgtcgcagtgcaccacaccttcggcaccgagacagcccaagaccttgtcccggtcg
cgtcgtgtctttcgggacgtcccgcccgggccgccttcagccccgggccgaggtgttctc
gacgcgcggcgcttctggctcctccaaaccttcggcgccgaagcacaactgtccgtgctt
tcggcaccgaaggtcagcaccgttcaggcgagctgctcctgcacaacaaaactcgcataa
ctcgagtagcattagcgattccgttaaaccagtactgtaaaaactcccccgtgtagccga
agccgcgcgtgggccgaaaccgtgagcctggccggacgtggacaaagcttccaaaggcca
ttttccccgatagtcagcaatatttcgctcacaacaaatctagatccatcaccgaccacc
aatgaagaacacgtgtatatctcgctccatgagggggtactggtgattttttttagagtg
caaagccgtgcggtttggggggtgcattgggccggagagagctggcggtggccctcaatc
aaacgagagagtccgtttcagaggtgaggcccgcctggcccggaggagaaaatgggaatg
tcgtgcgcgtcctgaaatcctacccgagttcggagtttcggactccccgcgccgccgcgc
cgcatccctcgtctcttccccgtgtcgaagtcgaactcgagctcgagctcttcctttgcg
ccgtcccgtggcggactcgacccccgtgtatgtaggtcacccgcccccggactatattat
ataaggcaaacccgccccccgccgcagccgctgcggcaccgaactaaccgctgcgtcccg
catccactcccacacgccacgaacgacctcgccgtagtctcttccccaaggaagagagcg
cgatcggcagccaccagccg
>Pgl_GLEAN_10030123 PgMYB143
tatcataatattcatcacagtcatcatatatatcacaataatcatcacaaacatcacata
tagataaattcacatgttactcatcgacaaagtccactagtacatccaagttcatcggaa
agtccacaagttcatcgacaagtacacaagttcaacaacaagcattattcaagttcatcg
acaaagctccacaaagtccaggaacttaaaatgacataaacgcgactcattgaggaggag
ggaagggctgttgtggggctatcggcggtgacatgcccggggacccttgtagattattcg
aagccgccgattgattctttcaataaaaagagtaaattgcatgtgagaccacaatcaagt
tctctatgttataatcgaagttctaagtctttactttctctagatttctaagtgagtcta
agtctctgcgttttctaagtatgtaattattaaaatgaaagaacaaagatgtcaagtaac
tcaccacaggagtctcaggagctgcagccggagtcggaaggacgggcaccggggggcatc
acgggtatgaccttaaaaaggtatcaattacatgaatatcatttttccacgaactatact
ctattattttacgcacttgcagttcaaatttgatttatacgaacaaattctatcaacaaa
agaaattatttaaaattagcaaaaatgtagatatgatcacatgattggaatgtagagtgc
aaaataatgcactaatggagggaaaattaaaaggtggtttgcaaagttactttttaaaaa
acctttgtcgtgcgccagcacaaaacgcatggcaaaggtacatgtttgccgtgtgcctcg
cgcaaacgcacgacaaactttgtgtctttgccgtgtgttttcttatagcgcacgacaaag
gttaacgtctgtgaaaggccgcaccgaggtgatgttgtaccaatagtgaacaaggattgt
cgtgcgtcgatccgaggacgcacatgcgtctgtccaaaaacgcacggcaaacacagtgaa
aaccgtgcgtagatgtttgtcgtgcgccttagtaaaaacgcacggcaaagagaggctttg
ccgtgcgcccgatagaaagcgcatgacaaatattttaacacacggcaaaggtgtgttttc
cccgtagtgaccggctactagtcagccggggacccgtatcagcgactgatcgatcgatca
gctagtactagacacaaagcagtggcgactatagcgagtagtacttgctacgggatacta
ctgggctcctggcacagtatactaattactacttcgcgcacgtcacgtactaccccggcc
ggccagccagacgcggccggtgcgtggtagctcggaaatacatacagcgcgcgcgcgggc
gccgccgacaacgtggtcgcaggcgcggccnnnnnnnnnnnnnnnnnnnnnnnnnnnnnn
nnnnnnnnnnnnnnnnnnnnnnnnnnnnnnnnnnnnnnnnnnnnnnnnnnnnnnnnnnnn
nnnnnnnnnnnnnnnnnnnnnnnnnnnnnnnnnnnnnnnnnnnnnnnnnnnnnnnnnnnn
nnnnnnnnnnnnnnnnnnnnnnnnnnnnnnnnnnnnnnnnnnnnnnnnnnnnnnnnnnnn
nnnnnnnnnnnnnnnnnnnnnnnnnnnnnnnnnnnnnnnnnnnnnnnnnnnnnnnnnnnn
nnnnnnnnnnnnnnnnnnnnnnnnnnnnnnnnnnnnnnnnnnnnnnnnnnnnnnnnnnnn
nnnncgagggcgcgagcgagctagctcagagcgcgcgcgggtgtcccggcggccggccgc
acgcgcaccaacttcttcttcttcccttcaaccccttgcttggacgcacacgcgagcgaa
ctgtgagcgcagtgtgtgagagaggtgctagatagcggcggcgcgctgccggggtgtcat
cgtcaccagccggcagctagctacctagctagctaggcttgccagagctagagctagctg
cgtgctagcgagagatcaag
>Pgl_GLEAN_10009509 PgMYB148
aaaagaaaggaaaggcttgtttaatcgggcccttttcgaggccatattcgcctgtctggg
agctccgatccctttttcgctgtacgtttatctgattatcctgggtgcggtcgtggtgat
cgatccatccatcctgcgcatgcgctgctgcagcagtagcggctggaggaagggccgggg
gtggatgcatgtacgatagatttggttcagatcacaaggattggtggatgtgctgattgc
ctgatggatgatatcttccgcacatgatattctctagagaaccttagctgtaacctgggc
tacgtggcacttcagctggaaccatgcgaccgacatgtacttggcctttgattctgtgtt
catcatgcagtgttcagtcttcagtgctaactgctgcatatatgtgataatgttctctta
cgtagttattagagaagcagctcctgttctttgattattcagtggaaaatagcttggctg
aaaattgtctacagacactccggccatcagcttaattatattgtcaaaatcaagccatga
tgcatgccaagcagcaggtcgttttcgtgttgatggacctctcacttcatgtcatgttcc
actgtcaagagggttcctcgctgactttgttaacatcactgttctcaagtctactctgaa
acagggttccagcgctgaaagtctaaactacgcggttaggcccactttcggccactggta
ataacccatctgaacctaaaaatggctatcatttaccacgagtagcgaacattagcaccg
atcatgcacggctttaaccgcttcaactcctacgttggtggaaaagagagatcgtccact
ccactcgcgcgcgcgcaataatgcttattagggagaagaacacttttcctttatttgact
cctcctcaccagtttcagtagctcctgatcagtcgtctttacagtacaatgtgttttggg
aatcgaatttgcttgcaaaagtggcacacaacgcgtagtaattagcactaaacaatagca
tccgtgcaggtcgacgttgatgttgttcacagcctatctatatgcgtggtaatcatcagg
gaacaggcacacaggcaacctagctcaccacaattagacaaactataattccatatggca
atcaccaagtgactcatcatcaggaatagggacagggcaatctcgccactattaaactaa
agagtactatgttccctgcagaatcaggctttggcataatttacttccaaattaaaaatc
tttgacatcagacaaggggggaaaccatttatctacttgcgcgcagaacatatactacca
tattactttactattagtatggcttgactactattttaggccaccagcaatgctctttct
aaatacggtctacgctcattagtttacacaaacacaaccattcattgtacacgaggaaag
gctcattagcttgcatagataaccatgcatcagctgacaataaggggatgattgatgtgg
aaggatttcggaataaaataacctagctatagatgacgaggcaacacgctaaagatgctt
tatttgcagcaagactatctagcttgttgctttgcactgcattgcatcaccacaccacag
accacacacaacattctagtaggacgggcccttttcccaggggcgaaacaaatataatat
tgggcgggaggcttagccaagtgggagtggaattgttactctcccggccctcccgcccgc
gaaaatgacacgacgtcgatcgcctccctctctccgcgcgcgcgcaagctcccaacttgc
gagctcgtataaatggcgagcatggccgcccagattctagctgtcatacaagccgggaac
accagagcccagcagcaactagctgcatagagctgagcttgctggctggctattgtacct
gtacaccacccagcgctagctagcttagcttgctgcagtatagctcgctcgtagccatat
cagagaggcacgcaaaggcc
>Pgl_GLEAN_10034383 PgMYB137
tcttgctcaggttgcaggattttttatcgttgaagaacgtgttcttcgaactgccgatgg
attgttgtctgagagccaagtggaaacaacatgggagacagcaattgccaagataacaac
tatattggaggagcagttctcacgtatgcgtacagccagccacttcctccttattaaaga
ctatgtcactcttctaggtgcagctgtgaacaagtacggttatcaaatcacacagttgat
tgaagttcttgagaaaagcagggacaaataccaccagttgcttcttcttgagtgtcgaaa
gcagatggatgacatcctcactaatgacttgtatgagcagatggttataaagaaggaata
tgaatataacatgaatgtgacagcatttcatctggatcacgacgatgcaatccctgattt
tccatatgtggcaccattctcctcttctgttccagaggtctgtcgtattgtccggtcctt
catcgaggattctgtcagttacttgtcatatggtggtctcatgaacatctttgatgtggt
gaaagtattcctagacaggctgttgattgaggtattgaacgatagtcttctgaacatgat
atatgctcgctcgttggcaatgtcacagatgatgcaacttgctggaaatatatctgttct
tgagcaagcgtgtgatatgttcctcttgcactctgcccatttgtgtggcattcccaagcg
tgttgctgagaggtctcattctggtttgactgctcgagccgtgctgaaagcctcacagaa
tgcagtgtataattctctaataaacctggccaatttcaaggttgatgagttcatggtgct
tttggaaaatgttaactggatcacggaggaagccccagatgatgcgaatgactacatgaa
tgaggtcctgatctatctcgaaacactagtatcaacagcccaggagattctaccattgga
agctctatacaaggtagtttctggtgcaatgtgccacatctcggactctatcatgacaac
acttctgaacgatggtgtgaaaaggttcacagtcaatgcagttttaggacttgatattga
cttgaagctattggaggcatttgcagatgagaaatttgacagcacaggactgtcagattt
gggcaaggaaacaactttcagagattgtttggttgaaattaggcagcttgtcaatctcct
gcttagtagccaacctgagaattttatgaatccagtcataaggcagaggaactacggatc
gctggactacaagaaggtggcaatagtttgtgacaagtacaaggattctgcagacagtct
gtttgggagcctttcgaaccgcaacgtcaagcagaatgctcgtaagaaatccatggacgt
tttgaagagaaggcttaaggattttagctagaatttcgggtgttgcatttgcaaataagt
tgctggcgctagtgtagtagtgtccactttttaggtgtttttaaagctcttatgtgactt
ccttgcttactttccaatgaatacaatataagtaggtcagtcagataggtcaaacgttga
caatttgtaaattatgttagtactcccaaataatcaaggggtcaaattcctataatgcaa
ctgttgaatgttataatattttagttgatgttgccattgatctctcataaactgcaaagt
gaagctttgtgctgccccatcagaatatgctgatataataagcatcctatcagcggtgcc
tacattggcaaaagcataaatgtcccgttttgaggggtagctccttaaaaaaaattaacg
aatatggacaattttacacttggttaaattgagatcttaatggcaatttcagagcacaat
tcccatataaccttcaagccccttgtgtcctttctcctttggaatctttatatattctac
ctgctattactacagaggccacagaagtggttctcataaagagaggaagggggagggaga
ggggggagagggagggaggg
>Pgl_GLEAN_10024824 PgMYB139
agctatatatgccacttagattctcgtacgctcaaaatgcattttatttgctccctaagc
ttgggctcgggtgccattttggtctatatctagccctctagatttggcttcgggtgtcat
ctagattcatatactttctaaaagatttttcatctcaatctaattcacaaaaactatttt
ttacatagatatactttaaataatagtgtaaaataaaatgaacttcagctcaatgtgtgc
agaatattgatatgttgaatccaaaatgatgataatcttctactttggagacaatgtcat
aactttgtaggtctgggccaatgataatccaaaaagatgaattttagcgggttaatgggc
ggtgcatcccacctagcacacaggttgttgggccgacacgacccatatgagccatagaag
ggctaggtcgatctgggccaatgagatggatggtacggcgggctgtccaacccaataacc
caacccgccactacgaatgggcctaaacaaattgagcctgaatgggctcgggctaggtcg
ggttgggccgccagtttggtcatgtatagtgacaagctcaattatttttggaagattgtt
caaatgtgaataactcatagttgcatttgctaaaagtaacatcagggatgcataagatga
attattggaggatgaatattaaggagaagttgaaggggcaataaaacaagttagaaaatt
tggcaatgaaagtgatggcttgatttaaagcataaaatttgatcttatcataccaattgt
atcagtgggatgacaccacatttaagagtttaggaacctatatatatgacacccgaagcc
aagtttaggaagtcagatttgcattatgagagtataggacctaaatgacacgtgtgtcca
aatgtagagagcatttcgaaagtatggggacttaattgacacacccaaacaagtttaaag
gagcgactgttcactttactgtaatataatatttactgccttcaattctgtgattgtgat
caacagatcaagcatcaacacaatgatctgatccacacatttgacctcttttcagttttt
tttttaaaaataagttactatgacaaatcttacgacttattaacagcatacatatatatg
tttacgccagttaacatttctatacgtacattactgatgatccactaaaaatttgtttga
ccctgcatgcattgctagctgtattcgttctagaaacgacacacgtccatctattatcta
tatgcctgagaacggagggaggagtaatgattaagaggaaaagcaaggtcagtgaagata
tcatgcatgagcaggaaaggaaagaagaaaaaaggtggcgagaaattaagaggtagcagg
aagggccgtgggcgtgtgtgggggtcaaccgccccaccacagctgtgcgtgtgcctgtgc
ggacagttacgagagaaagggcctatgagcaggcgccggcgaagattgccttatcatgac
acaattcatgaccaaactaactagcttttttatctaatagtttcgttctggccttctctc
ttgtagcaaagctagcacgcttgcaaattaaacacgggtagtagcagccagaattgtaaa
gcgagacaggcaggccagcagggccgcgcgcgctagctgtgcaaccgtgcgacgacgacg
acgcagagcaaagcgtgtggccatcgctccacttgtgaaaaggcacggcacccccaagcg
taggacgacgccgcatgcactgtggcgccaccaacccgagagcgacctccctcttcccct
cgctccaagctagcagctccctctctcagcttcgttcagctccctgctggcatcttttat
atctccctctcctctcctccacctgcctgccaccatcatatctcggcttccatacaacga
tcgatcttgtcgtcggttggcggcgtggcgcacggggaggccgaccgaccgacggtgacg
gcgaccgacgactggccggc
>Pgl_GLEAN_10024859 PgMYB138
aacttgaatcaggaggcatgcatatgttgccagaaggttttggtcttttggatagggagt
agtttcgttaggcctcagaaactactgtactgtaaaggtgagacaagctgagatgtgcca
ttgtagaaatccttcaattccttgcagctggtcatcatggacccgtttgaaaccatgagg
ataataggatcaccacaagacgttgcgaggctgcccagccgatactgcctgcactgcata
ggggagcgtcgtcggcagcacatgttcgcgttgtatttcccccgtggtgcaaggacggcc
ttgatggcgccgggtcgctgttgcattaagttgcaagaggaccttgcgatgaattgtgat
tgtggctcagccgctgctggctggctggctggatgagacctgatctccaggtaaggcgca
cacacacactagcttgtcgatcgagtacagattgtacagtgtcgtgtactagtgcctgca
accccatacgtatgccaattggcaccaactggtcaggatcagatctccgagcacaaggta
acagttactacctctgctaagcacatgacttgttcctcattagcttgctgcttggttaag
aaaatcctgatactgtgccgaggcagtatccggttacgtacggcatgaaggacatgccgg
tacagatttagattaggggacgttgctgatccatggaaaagaaaatgtgcagacaggctc
ataactccgtgctggtgatgtcccattaatgtgatctcaagtttcgccgggaactgctac
gccctcacgcggctcaccggcgtgtccgtccatgtcgtcgtcgctgttgcgcacgaccga
tgatggccaagttgacacgcgacatctggtacgccacattaactcgcgacgatggcgatc
gcgggagctcgccggctgacccggtcagcctcctccgatccgctagctgctcactgctca
ggtgggttattgcgcgttgactttggtcactatgccatttactgtcatcccgcgggttga
cgctgtacgtagctgggcatgaatgcagcatacagtatgctccctcggtccctcctgtgg
atttaatttgttggaggagttgtccttctttccctaggatgcactacttcaggtgttgcg
tgaacattaagcgtgcaatacattgcttgcttccatctgcaataacctaataaccatgtg
aaagaagtatcagtacatcaagcatgtaccgatgtacgaatgaataatcagtacgtactc
cctgcataagagtactcttgtctactagacccatcgtatgtttactattgcttccatctc
acctgcgagatcgtcaatctatcatgccggccatatcaagaggtgacgaaatggtaaatg
aaatccatatatgctttcttagcttgttctgtggtggagatagagctgcaggctcgcatc
ataggagtatgtattgactcgatcggaagccatacccatcgccatgcatacagatcggcg
cgccataattaagcaagctgtattctcatgtgcagtaactgatgacactagtcgtatgta
tagccgtagctccgtgccgagctttgactctcgatctgacctgatcaattcaccgtgcca
aatccacatccacatgcagcgatcactctgccgtttgactttgctgttcgtgaactgcat
ctgcgtgttgtggtacagtagactagatcatttagagcgtcagaaaagtcattgcgtgtt
gctgctgcctctctggtctctggacggcagctggaccttcgccttcctgtggatataaat
agacgcacacatgcctctggaccctcctgtccatcgtagtacactacacccgtagtactt
actcaccaacactcgtctaggcgtgctcccgccaaagctcaaaagcctcctatactccac
tcttgatcgactgttcggctgctggccagccggccggcgtcgacccacgggccgatcaag
caacggcggcgatttgatcc
>Pgl_GLEAN_10009748 PgMYB126
agtccacattggtaacgggcgttgtggaggccgaccccggggtcgtcctggcgcgcttat
aggtaacgggcgccaaacaacaaccgttacaaatgtgggtggatgtaacaggcgttaagg
gcccgttacaaatgctgcgtgacctatttgaggttttcacgtagtgttcggtccttgcca
ccattgggactgatttcatcaagctcataaacacaaataagactccttaattcctccttt
gaacttgttgtgaaatcgtcctttatgtccatgttttcctacataaacataacacttcca
aatgcacacacgaagatgaacttgttatatgattagtgttcctagtggtgggttagttcc
ataatcaaattcaaaccaaagtgtaatgaacatgtttggtgtaccaaaatacaccgtcaa
caagtgtacaatttaactagttcttggataatggtgaaacctctctttgatgatgttggt
ggatggtatttagttgttttgaaactggaaatgcagatcaaatttgttattagcctgcta
tgatggaatcatgcacacatctcactattatgagctacctgtggaccatcacttgttgca
ttgcgtatgtttctttgctactactgagcattagttgttcctggaccttggccttcacac
tgccaaagagcaattgaagaaacttctatcagtcatgattgtattgtgcatagaaataca
ttcatggtggtgctatcacaatgaagttcagatttggtagatctataacaaataatatat
ggtaaaaaagtatattatgaaaaattcatcactatttttataggttaagatatttgataa
taaaatgtatcctaaagatacaaaattatttaaaaattaatgatccaacttgtgcatgga
aaaacacaaatgcaaattgtattatggggtaagttgaactaaatagcatagtttagggag
taaattgaaccaaaacatagtttcaaatgttatttgtactttttctatacttgaagggag
taatttggaccttttcttttagaatatattcacataagaagcataatggtacaatctaat
ttttatttgggcatctagtttgatatataactttccttatttacacttaaacatgttacc
tcgtctatacaggactcataatagtccctgaactttttgccacttacacccccgtactga
aaagaatgcaattataatttcttaactcaaaaaactataaatttgaccaaatatatatat
atgtgtgtgtaagaacttctgttctcaaataaatataactaaacatcttatgaaatatgt
ttttacgatgtacctatctcgtgtcacaaaattttgtaacatttcttataaatttgatca
aatttaaaatggtttaactagcataagtattgcattcatcgacatcaataatgcgactcg
acacatttttttttaagcacagactcctgcatacctttaaacgggcccaatttgaaacag
cccaacaaagcgaactggagcgcggagcgccggcccccttgcccgggttggatggacact
ttggactgcctcagcactcagcgcaccctgctatactagttcagccaccaccccagccgc
cgccgccgctgccaaccagtttccaaactcatcgctcgctctcgctctcacccctcctct
ccgcctccgccgcgcgcctcaccgtcacggccgctcctccacctcgccgcggctgatctg
ctccgacgaccgcccgctcctcatggtaccattccagtcccccagcgtgatccttcttcc
ccccttgttcagattagattagattgggtttgcttgggttgggattgcaattgctgcaga
tcgggttaggttgccgatttttttttcttccgctgatggatttgctcgattcctcacagt
agatacaacaatctggtctcgcttgcggcgtgggatcagttgctgggggtactacgtccg
tcgcgtcacggcgccgcaaa
>Pgl_GLEAN_10026185 PgMYB141
cgatcggcctgtcgtttcttgccgtgcagtggagtagtagtactactagcttgcctgcac
gcacggacgcacgcaggctggtgcggtgaccggtgagcgaggtgcgaccgtgcgagggca
atcgatctcacggcgaccggcggtgctgtgtcggggctaaaacccgtgcaaaaatgtcaa
gcttctcgggcggtttctgtcggcgctgttgctgccgccgttcgtagaccgaccatgctg
tacgctcgtggtttgcttgcatacaggtagtaacctccgtagacgactgcacggggggtg
gcaatcgcgtatagctgcacggggtatattcacacggcgcagcggagaccgggagccctg
ccgccaggtgtgcggattggacagtgtgccgtgtgcgtggacaatggcatgcagtgacac
tgatggggggatgaggcagcagatcgatcgctgtcccggtgatcagacaactatcctctg
gcggtgtatacgtggatctcttcataacatctgttggggatctttttgtgtttatcattt
gaccgagagaggagggagctgagaactcaaaaatggcggtggttttgaaacgaacaagtg
ccaaacatttccgggagaaattcaattacgactttcttgcacgggccttttcgagcgagc
accagttcttgggccaccggtacggtgtcattcacaggaaggcaagttaatctagctagg
acaataggtgttccaataaaaccacaacgaaagcagcaaagcacaaaaggatcactacta
cacgggaactatatatgtaaacgtgctgagggcatatacttctcatcatccaagctgcgg
tgcgccagcattcgtacgtgctgaatttggcttgcttttccatgtgctcaaaatcaaaac
ccaccgatgatatccccacctgagttgagcacgcagcagatgtgcaccggggagctgccc
ccactacatgcatccacacgagctgtatagctggctcgtattttctactctcgaatcagt
agctagcccctgcttttttttttcaagccaggtccacatcgcgcgcggcgagcgcgtgcc
cggcgagctctcggcctcggtggtgcgcgttgcgagagcgagtgcgagtgcgagtgaggt
agcgggtgccagggggatggagtaatccatggagtcaaccagtcaaactcccctgggccc
aaccccgtgtacgtacgtacgcgggctgatcgatcgatcgattaattagccgctaatccc
agtaattaaacgtcacgctacccaatcggaaatgtcttaatcccccccgattacccaagc
accacctaaacttttggctttaaaagggaaagaaatcaaaagggataaactaagagctcc
tttccggtgccatatactagggtatactactattaaaaagggactagtatacaaacatcc
aacggttcagatcaattgtatacttcgtaaaacaaaatggtagtatgaggtggtatgcat
gggtagtactaaattacccctttatacttcgtaaaaccaaacggtagtatgaggtggtac
acatgagtagtactaaattaccccttctatacttcataccactcatgggtggtataaggc
accggaaaagacctctaaactaatctccctggttgcggcgtgctcccccacatgcctctt
tctttcccaagtccaccaccagcagcctacctcccggctccgtctatataagccccgtcc
ccccttcctctcccgcccacttcatcatccaactcttcttcttccttctcccgccttcct
cccctcacagcagagcagctgacacctagctctcttcaaactccaatcctactaccacaa
cccacacactggtccggccagctcgcactcaagctgcagcgatatcccgctcaattgatc
gatcgacgatcagcgctgagagagggtcaagcgtcaaggggttgatttctcgagggagag
agatcgagagcctgatggac
>Pgl_GLEAN_10026117 PgMYB132
gtagtgggagccttcgcgtggcccctgctgacgttgcgagggccgcctgtgaagcgctca
cggagtggggagtccgcacgcgatggctgggtagccgactcgcatacgatagcccacggg
gacatcgagttcgagttggagtcggatccaagctcgaagtcagcatgttggttgtagagc
gaaatttcgccgaactttccggcgagattgcccgtgactacttcgggaagcgtcacgagc
ccagtctccgggttgggcggcatggtgaggcggcattggaaggatccagtgccgtcagca
gtgcagacccaggagccgaagacaaaggtgtcgccgcggttgaaggcgacggttggcttg
attaaaatggaagccgtcgagttcgccatatgatcttcggcgagttcccctacctggcgc
gccagctgtcggtgttttagaccggcaacctaccaaggggagtacccgaggtagatgaat
gtggcctcgccgagatcggtaactcgaaggaagagacacgtggcacacaatttagacagg
ttcgggccgcgaggtgcgtaataccctatgtcctgtatgccgcttagctctggattgatt
ggatgtgattacaagatgatgcgtaatctgagagagaagggtccctgcctcgccttatat
agcccgagaggcagggttacaagtcggtttagggagagagtactagtcgtgtacgtctag
gagtcctctacacagtacatggtatgtatagcttcctatccgagtacttctccaccgtag
tccttgcgccttacgccatcaggtaccgtgcggcacaagtcgggtagtcacagtggccca
ccgagtagtcggtcctggtacccaccgaggtagtgagtccagggaggtccatacgacagt
cagggatttcggcggacaagaagcgtgcgtggaagtttcccctttccacgcgagcccgcc
acagctcccgctgtcgccaaagccaggccgaggaggaacgaggggagggggcgtgcggcg
cgagccaggagagaggaaaatggttgccgccgacctgactccgagcttgggctctggtat
cgaacacagggaaatcgccctgatgggcctcaccggcctattttggcccacatccaacac
gccccttgaaagtgcacaactttattctttctctgtcctttacttgttgcatggactcgt
tgctcaccctatgactcagccgtagcggcgctagtttctctatctagaaggtgcctaaag
agagtgagcgagtacgttagctacatagccggacacgattgcggccggaaatacaactcc
tccgatctcgacgataatgccattgccaaatgccaatgccaagcaagcgcctaaacttag
gaaacgaaggccatgcacgcaaataccatgcacgcgcacgcgtcggtaaccgcaagcgcg
caggaatagccggcgagcaaataggatggcgcgcacgcacgcgtgcggcggcgagcattt
ggcgggagcgatccgggaggtgcaccgcccacctcatcgccacctctatctgcgtccagg
tcccctgccgccattaccacggcttcctcctccgcctctccccccttcgtcttccctcgc
cctccgcgccaggccggggcggaaggccgtcgccgaccaccgccgccccgttccggcagc
ccgcgcgccgttgggcgtggttgcattgcatggctgctgccgccttgtttgttcctccgg
ttcccgcgcaattgggagcctgagctagttattagtcgtcggtttagttcgttgcagaaa
aaaaaaattgcgtacgggaggaagtcttgatctccccgccggctagcccacctttcgccg
gagaagctgatcgccgtcttctcgttctctctgccctgctcccggggctgagaggggagg
agagaaggccacgtcacacactcacaccgtgaagcgcgggatcgtgaggccgagagttga
ataagctggcggacgaaacg
>Pgl_GLEAN_10020860 PgMYB166
caagttgaattttaatttaagactttgaaaggagatcctggccatcataatctatattat
aaaaatagtttatattttttttgtcgtgatacattttgtcattaagttttctacctatcc
atatagtgatgaaaaatctatgatatatttttaaatgttccttatgttgcctcctgtcac
cttgccaaatttgaacttaaaactctacttgtgagtggagaaagaaaaaaagacaaattg
tgttaagggtaaattgaaattatagctatcccttcattgccattggattctatattgctt
cccatgtgtgccattctgttgggctccttcgtcaccttccgcgactgcctctgcggaccc
cacgcgtcagtgagaggataataaattgtttccccttccccctctctcccaatctcccct
acgtcgcgcgcacctcccatcctcatacttccacacaacgcgtcagtgtaacatatcagg
cttgatgaaagaaaacaactaaccaaagcgtgccgggactgtttttttttaaaaaagcac
ctcccaggaagccaggcatacttttttttaattattaaatccacttgtaataattagaca
aactaagaagtaaataaatgggggcgggcaattatggcatgtcgactcattgacctcgtg
tcaatttttttgggtacgccgagcttccagatagtttcattcggaccaaacacggtagca
tgcaagtcttaaacaaaacgctaagacatccaaccccaccagacactctgtacagagacc
gacaccaccattccctcctcctgcgccgcgcggtttcctgcatctcgattgtcgctggcc
ccgtttctcgcgcccgggcggccgggcgtccgacgccagacggcaacgtactcgctcggc
cgggggccgagggctttaaggctggaagtgtcggcgggcgggggcggctgcaccacgcag
tgtatcggcatccggatcggggcagacaacgatctcggttaaccccttccactaggagaa
aacgaaaagcggcgctgcttttacacggccgaggacgaccccggccggccagttcgactc
cgacgcaacagtcggcagcacaacaacacccatagctgctgcttttgcttggtacgatca
ccggcgacgactaaacgaccgagcacgattggtaaggtcgggcgtcgggacagcgtgacc
tcgccagtgtcaccgcaggtattcgcttggcttatcagccaccagccagcagtaattttc
tctcagaacaaaccagcaaccagccagcagtacttttctctcacaaaaaccagcaccagc
catcagccaccagccaaccgaacaagctgatcataagcgcggctcgaccgacgtggaagc
ccgattagttgtcagttactattactcgatcgatccttggtggttactggtgagatcgac
gcgtgccgcgtttttccttagcgcccagaccggggggggggggggggganggtgcgaaac
caggcttttccctctgtcggtggggcccgcagcgcgcgacacaaacacagcctctctctc
tccctcctctccggagcggcagcgcgccatttttaaccccaccttccccccacagaccgg
aggtatcttaagctccaatccactgaggaagtgcaaccagctctctctctctctctctct
ctctctctctctgtgcccggccggccggcttgcttagaacccacttgatcgctgcgtcgt
cgcccggccctcgtctcttcctccccttccccttccagctatcacccgtacgtgcgcagt
tctgggcacgcttccccatatatacgccccctccgaccgctctcggcggatagagatgca
caggcagtgacgcgcacgcatcccgacggactaggtagctgcttcatcagctatcaaggt
cgcctcggccgcccgtgtcgggcgggaggcggacgcgcggtcgactggtcgaggagagag
gcgggccgggggcgatttta
>Pgl_GLEAN_10036366 PgMYB167
ggctggagagtggagacgaaggagacgaggacggatcgggtggacaggcgcagcaggcgt
tccttgcatgccaagcatgcacgggtactaggctcctagtagtacgtagctatggttgga
aaatcggaatctggaagcctggccgccgcacgaggaaggtgtgctcacgtcgcaacatgc
acggtgcaccggaccgtgatgctgacttcggtcgtcgtgcaactccaccggttgtcaaca
ttccaaacggctcctccctcctgctcgacgcttttggaattttttttatttttagtatta
tcttttacaattttgcgaaaacaacaacccacagtataaaatttatcaaaactagctttt
ctgctgccgttgaaatggcgataaggttcattcagcggtaaggctagctcccgcaatact
ataatgctatagcagtcgtcttaccgccggttgaaacgacagcacctcccattgtataat
gttaaaatcataactttttcatatcatatcgtcgtgatgcacaactttgtagttcaaact
attttcatttggggtcgccttggtactcaaataatcaacacaagattcaaattttagatt
tgtttttaaatctgaatatgtgtctgttatttgagtacgaagatgattttaaataaaagt
taaactacaattgtagatcgcggcgagatttccattcgattcatatgaaaaaaaatatgt
atattaaatactatagcgctacagtaccggagggccttatcgctggttgaaccggctgta
cgtgcttagcgccaattaaaacagtggttccccttcacgtcgttttctccagcgacatac
tgttagttttggtaaattttaccaggtgatgttatttttccaaatttataaaaaataaaa
taaaataaattcagtcttgacacaaacatatatattaattatttcactatgaagatgatt
tcaaatgaaaaaactttgaactacaaagttgtatatctcgtcgaaagctacaatttttat
ataaaatttacctccatccgagttaaaaaaaataattttttttgaaaacagactggaccc
ctactgccgtgacccacggcagtagcagacgctacagtgccgctcgcgcccctaacgcag
tggggcacggcggtaggtccctgtcgccgtcccccacagcgctagatgtatagttttgca
aaaaaaaattccgtaccatatatttttgcaaaattgagagaaaaatatatgaaaaagaaa
aaatcacaaaaccgcaacccccaaagccggtgggtggcggctggctcactgagtcggtgg
accttgttgttcgttgtcccggcgccagtgtgttaaaaattttatattgggccatgccga
gcaagaaatcctaaaatataaagatttaggggcagcagccagcatgggccatcgtcattg
tgacaagctaaagaaatcaatgcaatcggttgaacgcccggcccaacaatcgtggcaatc
atgcatcgcctagaagaggcaagcaactgcaaatcactccaccgagcgagatcgatcact
ccgacttgggaagggtaaagcgtgcgcatgactgcatgacagcatgagcgaggcaatggc
cgtgagcccccgagcccgtgacacacgacacgatgagatgcgatgcgacgcgacgcgacg
gcaggaaatccaccaccaccgagattgccgcggaatcccctccgtttcccgaaacgcagc
agaccggcgcgcgcaaggcaccaaccaccgccaccgaccctttccctccccgggggtggt
ggcggagccccgcgcgcaaaagcgagcgcgcgccccccactcgactcgtgaggaaacagc
acgaaagcgacctgaccaggcctctcgatcgggcgatcgagcgcgtcagctgcctctgcc
tggtcacaggtgatcgatcgagccagcagggctctcggcagcctaagctagccagtaggg
gccggggtcggacaacggac
>Pgl_GLEAN_10014001 PgMYB179
gaggatggcacagtggcagctcggcataggggcaaacgacgcggcccatgtgtgggaggg
cgtcggcctcgtgtgggagtgatggcggcgggagcacaagtgggcagcacccccacgcga
gagcgatggcggcaggaacacatacgacgcgacgacgacgactcggtacatgggcagacg
gtggcgctccaacacatgacaggaggatcatgcagagagagatgagaaaaaggacgtgga
tggagaagaagataaaaatcgagggtcgttttgcatacatgcatgaccacctaagggtat
ggaatcaagtagcacaacttaaagtttggggagtcagattttcattttgcgagtttggac
ctaagtgacaccttgcatttaacttgaaaaatggtgtagtgggtgtcgcaacagtttttt
tactctatattttttagtttggaagtgcattattacttcattttacattgcgatttctga
agagtacatgattgtttgtagaaaaaactcgggtcacgagattacactttttagcagtac
cttggctatatattaaactaggtgatactccgctgcgagaatgttttgaacaaaatttta
aggtgaaatgtgaaagtagtgacaccaaagatattacatggcaatattcgtttgtaaact
cattatatatgaaagcatattattttgttgagagtgaatcattctaatatcgtcagcagg
aattttgtggtgtgatatacatgctataagccacagaaaatcgatttaagacataaatat
gtgctttggtggataatgacatggcgtatagtggatggtgacatggcgcatagtggatga
tgacgtggaatgcttgcatgttgagagaaatccaaccatgacttgtagtgggtctcacct
atataagttttatagatacgaactcacacgcacatttttatcctgaacacattctcataa
aaaatgctgcattttcttttgcatttggacctgaggatcttcacacgcatggtactcttg
ttgtttggccaaatgatggagccatgttcagccgagcaaaacaaacctttttttttcaca
cacataactcgtgctgccaatccttggatgctatcattgtaattattttgatgtcacaca
atgtcatggggggttaatgatgggtgtggtaggaaggagtaccgaagcagtgagtgaagg
aggacgaaatgagggtagggttcctttttttccgaccggtccgctgctatcgccggcttc
cggtagtggtaagccacactggttaccacggataccggtaaaaacaggacaaattcaaaa
ttcaaaccaaaactcgtagttcaatcggttgccaccggttaaccaccgaccggctaaccg
gtcggttggaatcaatgaaaaatttgacatattttcaaatttgaattaaaaaatgaaaaa
aaatgctacaaattttgacagattagattttgtgcaccttgaagtatttgtaagattttt
gtttcattttcaattttttcaatttaaattcaaaatttttgaattgctgcacttaggaac
cggccggtaccgccgccagtcccggaacaatgggagcggttaccgcgatatctggacctg
ttcccaccgtttttttttaccctgaatgagggtcgtgtagttcttttttttgttgttctg
tgtgtgtggactgagcatgggtgcgcgtagggagaacgggggttctggtggggtttgtca
atgagacgagagaccaaaatgttccacaccacagccacacgagcggcctccgaaggtgaa
cccaagggaaacaaggaaaaggagaagcaggcatcttgttcgagtgttggagccagagca
agagcctctctctatattagcaagccagcctccgatccctttgcagctgcagcaagcact
ccctttccctctcctcctgtcttctccatttttgattgcggcttcctctccatctccttc
tcctcaagccttgggcccag
>Pgl_GLEAN_10014000 PgMYB178
caagaattgcactgagttcttactttagatctatcattgcggtttaatggcttgatcggg
tcgtgcgcatagttggcgcacatgaagaaccgcatcccgtaagcgtgcccaagagtcttg
caattgacaaccttgcaattgtcaccgcagtagcacataggagtgtggattcccttaggc
accacaaccacctcttgtctcgtagtgagtaactccaagtccaactcaggacatgaggca
gccattccgaacctgcaaaataaggtattatttggaagttagcacatgaggaaatccaaa
tatttcaacgaaattataataatgcagtaaaacaatatcgaaagaaattaaggaatattg
gttcaattattacaacacaattaaaacaggatctagtttacagaacaacattacactatt
attacgacaccatgattcaaacgaaatagtatttcagatattacaccactgcaagatgaa
acactacagcatcgcacaaagtgacagacttcagcccttcgtgcgacgtgacaacgaagg
tttagcttccttggtaggttttgtagttggtggattagcaacacacgggtctgctggtgg
agcataaggaccacccggagcataaagaccaccataaggaggttcctctcctcttgcaat
ggcattaacagttttctgttgcaaataatgatgcatatcttttggagcataaataccatt
ccatggaggttcctctcctcttgcaatggcatctgccgttattccttgcaaatgacggag
catgactctttccaacgtgctcattttcttcggatcaggtggtgtttcaaatgtggtttt
ccccctgttatgtggggaatcacgattacaccaccattgccatcctcaccacctccggca
gcagttgacgccatctctaattactgttacataaattcaacatgacaaataaatacgata
gcatgaataagttgttacagaacataattgtaggaaatacttgtttaattattacaacac
gtctgattacgataaataagacattattacaaacaactcagaaataagacaactaaactc
aatgcattccttcattgtgatggctacgacgtctacgtccacgtcccgaaggtgcacttc
cactagccgaaggttgggaagcatcatctgcatttgacgaactaggtgaattgcaagcgt
acttgttgcagtgcatttcttgtaggtgtgtcctggattgttgcactttgagcagagcgc
cactgaacgactagcttcagcttcatccatggtgttcctgatcctcttcttcttccctcg
accaatgccttggcacaattcaggatttagatcaggtatgtatgttgcatttcctttggg
atcttcaatgaacgaactcatgaagagatgacccttcagagtgtggttccaagtgtccag
tatggtttgcttcaagtatgacacgtacggaccctagtgccaacctttagttttaaaaca
tgcagcgagcacatgactgcagggcttgtgtagtagctgtggtttgtggcaggagcatga
gcaagtcgtgttcgctagaaccacgatttcttctctcattgccgatttctgtgatttggc
tttgcactcgaccagatatttccacctagtttcagagcaacgtctcataaaagagtgcaa
ctttagttttttagacagattagtggaggaatgaaaaaactataataccctcatttattt
gtcaaatgcagtaaattttaccatgcaaatcagatgtgacaacttaatttaaaaggtatt
tagactttttttataggattgaaggaaacatctctctttctttctcgatcaggtcggcac
aaggccgccggccgccagtgaacagttatctctctattttagccacgcctagctttgcag
cagtagcagctagcagcaggcactcgccctctcctgccttctcccgttgctcttcttctg
ccttcaagccttggatcgaa
>Pgl_GLEAN_10014003 PgMYB180
ggggagaaacaaacccttcattattatatgattatttttcaataaacatgtcatattcta
taagatattactactatatcttttattgttagggatgcattgcattgcgaagtatagatc
atatagaggttggtgtaataatagctccacctcttgctaaaactgctcattgtttctata
tactccatacagagttaaaaatttgtcttttggatatgaacattaaagtatatattattg
tagacatgaaaattacattatataatgttgctatgctttatagttatatatactagattg
caatagaaaaaataactttatagtactcttccttactgctcctctcatatacgaatgcaa
caaccacaatacttattttatttatcacaaacctacgtattgttcaacaagtcttgggtc
aaacaaatgttgtgaatttaatttgaatctagaaatgtgggcatgtcttatagaaagaaa
caaaatgacacatgtaacttgtattggatcatttatatagaatcttaactcttgtgaaca
aaagtacaattttggtgtttggcaatagagactactcctcgttgtggccttatatatgta
acggcatgttattcctgagttgtccattgttattctgttactatgccgatatgcattgct
ttcatgattattcatggtaacctcgtttaatcatgatgattttagtccgcaactaactag
atgcatcacatatatattatatcaattctttattataaaaatattcttctcctacctcct
gtcttcaaataattgtagttggagacaacggtctagtcagatacactattttgaccaata
actaatagtggtgaacatttagcatttagcattttaaaagctgaagacgaatatagccgt
agtattttataatttcaacttatagattagaaaatgtgttgatggtcagaattagagcac
acatatatgaaaaacgacacgtattttgagtttgatagaagaagctgccgccgctgctaa
cgcgccctgtcttaccggatttgacggttatagcgttatcgtgctactgtttcagttctt
caaattttccatctacaagagggttttcctcctgcgcgtttgcaactcgtttagccgttg
cgggtatttcttgaatgaattataaaaaaaaacaccgtccgagatcctcctgtttttacg
tcattaaccacaaaaagatctcgaatgttttcgttgcacacaggactcgtgccgcccgtc
cttggatcctagcagcgccatcatttttatgtcatgcactgtgccaataatgacaagagc
aggggtagatgaccgatgtggttggaaggaggatggaaatcgtggggtttctgggtgggt
gcgcatagaggcgagggctcttgacggtgggtttgtcagggccgggagggacagagttcc
agcccccggtagtggttggggttggacttccccaaacccacacgagcggcctctggacat
gtacccggaaaaacaaatcgcagaaattctctttctctctctctctctaggacgacacga
gaacaacgacgcctgctgctgtcctgctctctctcctctccattctctctcgtccctttt
gccatcagtctcaaagtaagggaagggaagcctgaaagcccaaccaaaccaatcccatct
cccactctctccctctctctctaaaaaggaaggcatccaaaaccccaaccagggacggag
gaggttacgcaagaactagagagagaaagtgttaaaacgagcagccatttacttcctgct
tattactattgttttcgttgggcttgtgctgtggtttccagccaacacaagagccagcca
cttcctcctcctcggcgtcctgctatattaggctagccccgccccccattgcagcggcaa
caagaagctgtccctttccctctccctctcccttccgcccccactgcatccatcttctct
cctcacgcctcggaccccgc
>Pgl_GLEAN_10032520 PgMYB168
cgctgtttgagatgcgttcacaggcagataatctcgcaattagcaacatgtactgtgcac
ctgaacgttcagttagttctgacacggacggaaggggcgcgtcatctcgtgctcatcagc
ttcttcaattcctttttcattcagtccggtgctagctccgctctgaaactgacgtcgcga
gaaacagaaaagctggggcaatttgtacgcagtagcaaagcaacacggtttccgcggatc
cgcctagtaacaaaaaacacatttggcacagagcggcgcactccgggggaagaacgacca
gcgctgcaccttcccaggcccattttcctaccgggaaaaacaaaagaaaagacgctcttc
accgcgttcctgaaaatggtttctgaggtaagcattttatagataaatgaactactactt
gtatgtatacatatgcttgtggtcaattgcaatcagacggattgactatgcgcacagttg
caaattaaagtagaacagggtagtggaacatgccgctggtcacttggtcagcagcagctg
tgagagcaactccaggagactagccatcttggcttaactagctcaaaaacagaaaacttg
tccaaaaactcaatccaacagactagctaaactttccctcgctatcctccgctagctaaa
ctgaaggcttggctagtcatctttggctagccagtcctgctagctatcccctcgtacatg
agtatggcaggagggacccactagcggtggagcatatggagagtcaattttagtgagtct
gttggatttcatcaactttttgctagcatttcattttacacactaggattttagctggta
atttttagagagactcttggagttgctcttacagtcgtcagaggcggagggggggggggg
ggctgaggggggccaggcacccccccgatgctttgctagttctactattatatgcttcat
gatgtatgtattcaatagctacttagcttctaatctagctcaaacaatcacgtttgaggc
ctaattggccagttattacgtgtatgtgtatgcaatacatttagcttcaagacctgtacg
tgtgctcacaaaaggaattacggaaggtcaatcgtctgttcatctcgcaccgtcgccggt
ttgttcgtcttcttcgatttatgacttacgtagttgcggtccaccctccatagctttgcg
tctcttccagttgtctgcctccacacgatcgtgtctttactctccgcctgctcggactca
ctggaagccgaatgtgaccgtgcatatatgatgcaaaattgcacataatcactatttttt
tgatttgtttgtagaagcggctgcatctttttacatgagcatggaaccacccatgattaa
aaccatataattttgctatcggtgctacttttctttgtttgttgtcctacttagttttgt
gtattgccccctatactcaaaatcctgcctccgccccctgacagtcgtcgcccaagaaca
ttttaaatacgagcggccacggcgcgatacggcgacagggacgaacaataatacggtcgg
gacgacgacgggacgacggctggctcctccgcgagacggtcgccgcctgcctggcccacg
ccccactcgggccaacctggtgctggtggctggaaccgccgctataaaacgcgcctgcgc
tccccagcaggctgcagcctctcgctctcgctacctcgcttgattgctagccttgtttgc
cggtgattgccttgccttctcttctgccatcttctgccaaaaacacacacgcccacccgc
acgctgccaggctgcaacgccgcccagtcccgtcccgcgaggccaagggcttccgcttcc
cccaaccggctgccgcccggcccgccgtgcccgttccccacacgtgcgcgcacgcacgcg
tgcgtctgaattctgatcgatcggagccgatagggcgtgaggagggaggaggaggaggag
gagaagttggaggagagggg
>Pgl_GLEAN_10022280 PgMYB174
ctttgtccgtgctatgctgagctcttttttttttctgtccaaagcgtaaaaaccaaagcc
tgaaaggcagagtatcttctgtttccgggtgccatccatcacgtgaaaagctgtccggct
ttatggagcaaaagtgaaaagcgaaaggcggaagggcaacagctccagatagggtggtgt
tccttcttgcccatcgaaagcaaacagcaccgatcgaccaatagctggggaggtaagaaa
ccaaacaagaggctcaaaagttatttttgcttttgctcagaagcaaatttaatgcaactt
taaaatcagttttttcgtgatttcactggcttttgaggtggacaacttcacaaacattac
tcactggctactggttacactggctactggttacaataaaatgattcatatttccctaag
ttcaactgttctatccaagcattgattgttggcaatatagttgaactatgactgactgat
tgtttgcttttatccttccacgcgtagctgtgacactacacatggatctacgaacgggag
ctgctcaatcttcttgttcatatatgatttgtataagggcaagggatgctcaatctactt
gtgttatcaacttttattctttctttttctttccttgcaaagcgatagagaggaagatac
aatccaccatttcattatttttgtgatgtaattgggtacctacatctttacacttcgtag
tttctagcatagctgctactccctcgttttgtaatacttgccgttttagcttttttagat
acatttttttgctatgtatgtagacataagtatatatctagatgcataacaaagagaatg
tatttagaaaagtcaaaacgacaagtattatgaaacggagggagtaccttttctttttac
gcactcaaaatagctaccgttggtctactctgggcgtgtttggttgccccggactaattt
agcttgcgtgcatggagtattaaataaaactcatttacattttttagagatgagtacaac
tttgcgcagcgaatctaataagattaattaatctataatttaccacagtaatgctacaat
gaacattctctaatcatgtcatcaaatacatcattggattcgtctcgcgaattagcatga
gggttctgcgggtatttttgtaaagtgactttatttaataacacctctaattaactatca
aagggtggactaaaatttagcccacccggaccaaacacggccacttgaagaagacacttg
ggccatcaaatgtcattaaacatgtactgcctacacgctagggcgggctcacatgcccgt
taaacgtttgggatatccagtttctattccacattattctatctctttattgttttgtct
gttcgttatggttggatagagtcaatatgttttccctcttagtcatactctaatgagttg
aaattttgcttacatggttatatctccaatcaaaacgcatgaaaaagttgttgcaagttt
tccgcactaacaggcagcaaagaaacaaaaacaaaaacaaaatagaattacgaaagcgca
aagaaacaaaaacaaaaaaaaatccacggaaaaacttagcagcgtgtctctctcatggag
cctccggggtgcacgtaacgacgggccccttcctccgatttcaacgaccctccacgtgtc
aggaccagcgccgtgcgttcccgacgccggaggagctgcgcccacggcatttgttggtac
gcgcccccagggaaacgtccccagcaaatgggatacccatcttcttcgtgtctgccctct
gccgtgtgtatatctatccaaggaccccccaggttgcataacctcgaggtcctccaactt
ttttcacacgacccgtccacccagcccactccacaacactagagcgccggcgaggggcgc
gaggagaagccgccgcatttcttgcagctgtagcggtgatcgatctccccccgtctcttc
ctctcccaaaacgtgcaagg
>Pgl_GLEAN_10037339 PgMYB163
gttagcttcaaatcagccgagtgttttcacacacacatatatatatgatgatgatgattt
gacactgatccagctctggtccagcggagattctagctccaccggtgaatggatctaggc
ccagtttagttccccaaatttcaccaactactcgtcacatcaatctccgaacactaatta
ggagtattaaatgtagattaatgacaaaacccaatccacaaaaactctaccttatttttc
gagatgaatctaacaagtctaattgtgacataattggacaacgtcatactacagtaaaca
atctctaatgatagattaattagacttaatgcattcatcttataatttctgatccattcg
tttaattatttttttaactagtgtgcattcaatactcctaatagactttggaagagacca
aaagtttcacctcacgaactaatccacatcgagctcgttcgtcgttcggcagcggatgga
ccagaggttttccatcctgatcaaaatactccaatcttcaatacaaacgtgtagcgaaca
tggcctcatttgccatttgttcgagttaattttggtgattcatgctaacacaagtaatgg
gactaatcatattgtctagcgtgtccttgtagacacatctaggtcccatggatgcaatca
caatcaaaggaagcaaagaatcaagtcaaagatgcaacaaaacagggaaaagacactgtc
ggatgaaccgacggtccgctaagaataagcgtcagtgcagttggtacattgcgcagcagg
ccaaacgaagttgacacgtcgtatgatccgacggtccagtttccatttgcgtcggatgat
tggaaggagaagagctgcagaagacagtagcactagatgatctgacggactaagggtgac
ttagtgcctactgataccacgggataaatcgcatgtcaagagtttgcttcctctcatccc
tctttacgcttttgtattactctctttcaatccttacttgccttctaaagtagtatcatg
ctaggattggatagaggttgcaaaactagtgttgggattggagtttcacactaaacaacc
atagttgcacatctaggtagtatattctagttttactttaagcaaaagtagtaaagtcac
agtttaaggttttaagttgtctaattcacccctactctgttaagctacgagcatccgatt
ccttgcgaaacggcggcctcgtttcgggttccgaaataaacagttgttgcaaggtaccca
tcgagtagcgcggagtctagaatattcttgtactacatgcctaagcttggcgcttatcag
atcacacaagcaaagcgtttgtagacattgtttagtttgtcgctcgatcggagccttgac
caaagcatatatgtgttttcatgtacctttcaaaccgtgtttttcaatcaccataagctc
gatctcaccataagttcatactacaaaacaatttatgtggggattgtcttggaatcattg
atcctcctagctagacccgcccacgaagcgctcggcgacaagcttattggtcgttgaact
cttcccgcctagctacgtctagttttcttttggcatgtagatgtcgacgacgatagatgg
agacgacgactcgacgagacgcagtttacatgcgtgcttggtcaactccttctcagagcg
ctctctctcctcttggcaagatataagccgcggccgggggacgcgaccgaaccccggcaa
tcccgctgcctctgctccctcgaccacctctcctttcctctgcattctgtcgcctgcctc
tctccctgatcagtccctctctcttcctctatatagcttcagagttcaaaatcatcatac
ttgaacacactcgatcgatcgatcgatcaccttcgtggtagctagtagatagccggccgg
tgctgaagaagctatacggcggagcgtcgctcagcttcggcacaccgagacgaggcgacg
atcggttgggtcggagaacg
>Pgl_GLEAN_10032472 PgMYB159
gccctcagcaaaaatctggtactccacgaccgctcaaagcacattgatacgaagttccat
attctccgtgagtgcgtggatggcggggcggtgcgcctggcgttcgtgagcacccaaggg
cagctcgcggacatcatgacgaaggcgctcgggaaggcaaagtttcaagagcttcgcgag
ttaatcggcgtcgggaagctgaagtgaacggcgccggtgattagggggagaatgttggag
tttaaaccccggcgcgttctacttagactaggttttgatttccttccatttttagtcctg
ttttcggtttgtttcgttgagagcccgagatacttgggcgcgtcctgtacagcgacttga
cgtgcgcacgttcgcacagagtcttggtcgagcggatcgcacggcacgttctgagctggg
ggatggcgcagctcgcgacggagcgtggcgcgcggtgcgcgcgtcgtggcctcaatggcc
ggctgttttgctttgattcatatatatatagtaagtagaacgaaaaacgcaacaagtttt
tttggctgcaccaattcccctgtctcgcgtcgcggtgtgtgtttgcacggagccgccgtc
gtctctctcaactccggcgacctcgccttgacgccggcgagattggaacagggccctgta
cccacaaatgccaccctcccgagcccgccgccgtcgtctgcgtcctcggctcctctgccc
ctggaggccctcaacgcttccaggagcctccgcagctccggcgacgaaccctgtcgagcc
cacaaaccctagccaccctcttaaaaaagaaaatcataatacataatgatacattttaac
tctattactgcaaacattattttcatattgatgaaattactattctacccttgttaaaaa
ataagaactacgaaaatgcaattcttgccatgttttaatccccacatttgtggaggaaag
tggaggaaaattttcctcgaagacccacttgtcatagagatagatggaggaatttttttc
ctccatctgatttcctccggtttcgatcgacggctctcggtcaacgtgagccattgaatt
tttccccaagcatcataaattttttcatgataaacatatactaccttttttgtcaatcgc
cctccacgaaataaccactaaattggaccaattcaaatcaagctctttctggaagacctt
ttgtcgagtgacttttctaggattcccttcggtttgaacagaatatttggctccgataaa
atagcgatcatcaaaactatactacgcaatgcagggtcgtagcaacatataattttgctc
gagaaggaatcatgttttgaacgtcgccattgtgctcctaacactgaaaaggatcagaac
acaacaaaacacattatctacagactacaagctacctgctgcggattactaattaaaact
taatgtaggccctgcgttgttttatttacacactagtgaagtaactatcgtcgcgtcaac
ttttggaggtgaagggaaagcagccacaaccacaaggtacgtgttgtggtccttttcatg
agcacgaaacataccatgcatgcatcatcacctcgcgtgcccaccggccacctactactt
gtgcgttgcgtagcagcccacagttttactggccgttttttcttttccgatgatgagatg
gcgtagttttacagtgccgacttttaacagtgacatgggttggtgaaaaaaatcccgatt
cacgtcaaaaagaagaaaaaagaagtaggaccttgcaggattgatttggcccaacaacag
atgaaggagagagaagaagtagcccatatatacgattgctaatttgcagggccttgcaac
ggcccacctgaaaaattatggaccagtgggaccaacgtgtcagtctagcaggaatatagc
ggcattcctgcggaacactcgccagtcgtgtccccaccaactagcgccgcagcgggaagc
ccaacctgcccctccccacc
>Pgl_GLEAN_10035445 PgMYB173
gggttaagagttaacccccttttgatgatctgaatcacggtattgagaaagagatgttag
cttggaaatagaccaaatatcgcgaggcaacgggaatagcatgtatgaaacgatgtgatg
ttttgtctgctaagatctttaaacatgcataggagtttacacatcttgctagagaccgct
atcaactattcatcgcgtagaagtactcgggtcaagtctatgtgtacgtcaacctatagg
gtcacacatttaaggggatggaagccaaatgaggatgaatatatttgcatagttgactct
agtgtaagtgggagactgttgaaaatatgccgatagccaactggatttgatccactagtg
ggttcagatggatttgatctattatgatgtaaaagtcctaatgagccacaaatgttataa
aacccattagcgttggaagggttacaccatctattagtcccgtattgctaatggacgatg
gtgtgtaggggtttcctcccaataaatatggaccaacccaacaacgtcctttcattgtcg
cactcgcggacctagcagtccgacgtgagacgcttccttctccgtacgtgtggatacctt
ggaggtgttgcatctggagcgcttgatcggacgagccacacgtgcaagtcaagaaggacg
tgagcaactgcagtggctgctaccctcgacgcgttcgtctacatcgagacggttccgctg
catctgtgcgtctagtggcaatctcgtgatctataacaacagtagttcctggtttatggg
gttgaaaattttgttttgcgctagtgtagccaccccgtatcccttgaattacaacatctt
gcaacaaaaaaaatttgtggtcaaaatgtctaataaaataaagatcttatcaatgtgtaa
atggcacttatgtatacattattacttgataggtagttgttttcatgccatcctgaaatt
tatagagaggatcatcaaggcattatataggaataaattacattaggcaaacatatatgt
acatgtaattaacatggagtacatgcataaaccactttgtgctgttcagaaaaaaaactg
tgttacatcccagccaactacccgtgggatgaaagaagggaaataaagggaaaatgcaac
ggagagggtagctaacgacaataattaaaaaggctaagcacctttaccccgtaccggtag
tactgttgcccagagctgacgaattgacgatgatgacgagacggcgataatgcatgtggt
gtgctcgcccttgcccccacatgcagctagctttagcctttgccgccactggcatgcatg
cattgtccttggttccgctggctggagagtttgttgccgcatcagattattgtacttcat
ctcgcctcttccccgcacctcaagctacctgctttatttccttaaatctcccccacccta
cccccatccattagcccacgggggccttgcccttacccttgcttcaaccccactttatca
gatcatagtctctctctctctctccatgtccataatcaattctctctcctgcagaggcga
caccacactgcatctctctctctctaaacagttagtttctctctctggcttgctgtgcga
gaccactgctctcactcttttttcttttcaagttattacaagttaaccagtttcttcata
ttcactttattagaatcgcagctgttaattatcgtctctagctagcttaaggatcaagca
tcgaactgccttctgtcgcctgagctcagctgttagctgctgagaagcgaaccagagcca
tcgcttttatatcgcccgccaggccgtctcatcatcattgttgccatcacctgcagctag
ctggccgggcgccagccagcagtagtagtcgtcaagaaactgatcgatcactcgctccga
gggcacaacagtcgggccggtgcgcggcggggtagctagaggacgttgccgtcgtctcag
tccacactgactgactcgac
>Pgl_GLEAN_10010138 PgMYB177
atggcctcatttcttttctcacccagtctatttattctaagcgcgccctttaataattgc
cgtcccctaaataaacggcatccaaggcgcaaatgataaataaaacaaaaaaattaaaga
aataatgcaggtcctttccgtgcagatattctgttgattcaattgtttcccatacatgca
tctcgagcaaggggggaaagggaactcattagaaaaatcacgataatgagtgatgggtaa
gctcatgaatgactcaaaacctccaattaaaaggaatgcattttgtcgaataatgagagc
aatttcctgcacatcggttttcccataattgcgtgaagcggtgaccctgacaacactaaa
gcactcaaagcttcggggaaacacacgcgtcgcatttcgacttgctcgctctggcaaaat
tcgaaagaccatggagccccagaaaatcttcacaagcgaacaacggaagcttctgagcat
caggaaaagccgattttatacagatcactcccgattataaaacgttcaatcaacgctaat
cgattctgcttgtttaatcactacagtatccgcaggcacatgggcactatgaggatgcca
ttgcatcttccaatcatcgtgtcatgaatcaaggcatttcttttagcagacaaagcaatg
gaggataacaaataaaatgctagggtctgccacctcattgagactgttatacccccagtg
ttctgtctccgaaccaagacatcgtctggaagctttcgcaccataaccataagaaatcca
acaaccaatatacctctctatatactcaccggaccaaggtttactgaacatgtgcatgtt
gcggtcgcgcttcgccctgcgtcggaacacactgccaatggagaaagcataccacaacca
gggggcaatcatctgtacagaaggtctgattctctcgactgattgcaaactccttcagag
gtgccagcatgctttttctttggattggagcaaagatttctgattggagcctggaggtcc
taaaaaaaatttgcattgctggcttgtggagactgagaaaaggaagatgctctctgtcct
ggaatgcaaatatttgatgccacctgttgatgattgatggaaggtttctctgggtaagaa
atgatctggtgacttccctgcaaaataaacatgaaggatgatatttatgtatgtcaggct
caacatgtagaagataagagagactaagagtatgcaaacatgtgtatatactatatactg
aaaccctagtatatgtgtttcgattaggggaagtctcccagtcccagctgtgtacctttc
cctgcatggaatacatgtgacgcagaggttgccggggaaaaagttcatagtagcagtgac
agactagcagctctccaggtcacattcattcattacaggagacagaacatcaatcctttt
ccgaatcatgtaactttgacaaacctcttttacaactgacttgagtacaaagtaacaata
cttcttgatataggaaggatgaaccatccagagtttcttataatagtttgtggtaatgac
aacacagtaatagcatatcagggacaagtggaggtgcagaccctgaagcccaccgacggt
tgaagggacatagattctaggggctgataagacataaggacgcacacgcttacagagaag
caacaaagggaagggcagctttaaaagaagggggcaattggggagggaggcctgcaaaga
aaagaaacagggtgcccttcagcctaccagtgccttcctccatatcaatagccactagtt
gctgccgttctcccacaagctccactctatcagacatcactatatgagcccatataagca
gttcatcgacaataatcccacccttgaaccacaaatcgctaagaggtgttcttagaacca
gaggattacctgtgaagaattctgtgctgctcctcaaggtgtgtgcagattacagagctt
tagcttctgcattgctttcg
>Pgl_GLEAN_10022186 PgMYB170
tagtcgcgtacgtctaggagttctctacatggtataggacatgcatagcttcctatccaa
gtacttctacaccgagatccttgcgccccacgccaacaggtgtcgtgcagcccaagccga
gtagtcccaggggcccaccgagtagtcggtcatggaacccaccgaggtagtgggcccaga
gaggtccatacgacagccggatccgggcgcgccgccaccggagcttcctcctcgagctcg
tcgcgccgcttccctcgccgtgtcgcttccctcgctgccgcatcctcgctagtgcctagg
aaggaggggtttgaactgtttcaccacgacagaggagttggacaggcgcccacagcaaag
gagctggagcggggccgacggtagaggaggcggagcaactccagtcctgcacctccagca
ccaccgacaccccgccaagctccggccgccaccgcagctccttgcgccagcaggggagcg
gggtaggcgaagtaggagcccgtcgtcgtcccgccttcttcagcctccacgcgccgctgc
ctttgtccacctcccagcgagcaggggagggcgccatggccggccgcggagggaggatac
tgccgtgcacaggctggtcaatccctgtcccttccccatgccggcgcatccctggctctc
cgccgcaccacgccacgaccggatctccgccggagcacaagaagccacgatttgaagctc
gattcgtccggccctattcctccaccatggattgagctcaacaagagtgggaggttggcc
atcgccgcgcgtaggaggaggggctgtaggagctcgatctgccgaggaggaatgcgatgg
aggttggccggtgagggagtgggctgccggcgacgtgagggagggagcaccgaccacggg
cggaggaaacgaggagggagggaggcccgccgctggccctgtccatggtggtggaggcca
accgatgagggagggagtcgccgcccctgcccctgctccattcccgttgccggccgtgat
gagggggcggagtggctgaggaaggggcagtgggaggatgagggagatgtggttgggccg
gtgggggtgggtggggataaaaaaatatgagtgtgggccatagaggagagatttgaagaa
agatggatgcgggaaaactggggatgaaagatagaatctagatgactaggacaacatatt
ctgttttgaagggggaaatagaggagcaccggtgtggatggtctaaggagtaaggagttc
tctcaaccctcagcgcgccacgccaccatccactatgtcttctctcaacatgcaaggtgt
ccatatcactatccactaaaatcatcaatttatttcttctatcgattttctatggctaat
agcatctatgtatgcaatgtgttgcttgcaatagaatgttgcgaagcaatcactttagtt
tctactttcaaattttatctttaaaatttgttgaaattcccgtagcaacgcgtgggtatc
ttctggttctaactcatagctagcacaactgcaactttagtggccaatttcagttcaagt
ttttctaaagctggtgaggaaaaaaagcatgtaggggttgggatcctgtacttgtcccga
tctgatccatggcttggatttggtctaggcttttctttttttttccgaaaaggaaaggag
ttggggtagacagtagacttgtacgcgtgctccccgaaatggaaggaagcacctcaaacg
aaagcagacttcatgctttcccaatcgagccaaaggggcatgtggttccaatgcaacaag
aacgtgcgcgcgcttgatgacgtccacgtacccacccccaccgccggccccgctggcgcg
cctatataacgaccggcgccgaacgaacggtctacaagcacactagcaagtgcgtgcgtg
cgtcagttcatagttcgatatcgcacggatccacgcgcagacagacagggagataggaga
tggctaccaccagggtggcc
>Pgl_GLEAN_10037254 PgMYB162
tccaaacatagtatgatgatgtgaccaaatatcattttgggagggtcgtacaacctcata
agaaaagatagggaacataaaaaatgtcgaaagagagaaatggtatatgttagacggttg
aaaaggtcgaaacggtcaattaatgtccctgacgtaggatcgagattgagaggtcaggat
tgtgtcttctacctctcgacaaatttcttcttcctcacgtgttttcatgccctccattca
cttgcttctatcttgacggcacccttctgccaccgccacaactatgtagtgctactgcta
acatcttgttgttacgctccacgggtgcccgcttaccacccgataggtcccttagacgac
gggagatgttgcattcacaacatgtacatgtgaaaaacattttgaaatttcagtcgccta
gagcataggacttgttgtagatataggggaaaatttgctgcaggacgctatttaattttg
acttttgctacaaatcactaaaataacatgtctttgccacaagacactactcaactgcac
ctatttgttttaggacactataactcatataatagtttccaactcaagcaagtaacaaac
acataatctggacaactttgccttgtcgaagtccccacacgaatgtgacggtgggtgggc
acgcatggtgtgagagccctgacgcggcgtgcaggggcgggtggaggctcggcgtggctt
gcaggggcaggcggtcgcctacgtgcaggggtggccggcaagtgacagctaggcgcaacc
tgcatagacagacgacaggtagtgtcccggtgcgggagccccgacacggatggcagcaac
gaatggcgagagggcgtcgtcgctaggaggaaggccgtcgggcccatgcgatgcacaagg
ggaaggggagatgtagctgggggtccttggtcgtttcttttcaggttccatttaatcaga
atagaatataaaatttagtgtcctacaacaaataggtgtagttaagcagtgttttgtggc
aaagacatattattttagtggtatgtggcaaaagacaatattaagtagtgtcctacagct
aattttccctagatataaatatgttatgaaatagttaaaagagaagaaacaattttgaag
aaaatagggggctatagagagaaaataggtgcccatgcgctcacgcccaataccatggct
tctctggcgctgtacctttcagctttataatctgcccccaagcaaatcctccactcgcgc
aggctcgcagccaggctcgcccactctctctctctctctctctctctctctctctctctc
ctccgcctcctctctcactcctcaaaactctctccctcccctgaaaattctccacatact
ctggtagaagtggtggtggcatctcgcttaggcgagatcctcctcccccggttttcactc
ctctgctccacccaagtcgcctactttcctgcaatcctctgctgagctcacaagagcagc
ggggccattggaggagctcaattcagcaccacctcgggctcgaccggcaccggctgctgc
gagatcggccaggtagctccggttcttgctgaattccgatttgtttagggtgacctagtg
tgatctgcgggggaaagtgctgaatttggtccccttctccttctgtgtcccaattctgcc
gttcgagaattgctgttcacggcatgtggtgctttgatctgtgaattatgagaaacgaaa
acacctttctttctcttctgtttaccggaattctcggcgaaattgtagtgatgctactgc
ttggagttctcaagctgaacatgggttagccgttaattagtccttaattccttttctctc
tgatgatgaatttgggaactgggcactaattttcatctagtgatactgctctttattttc
tgggataaccaagtcgctactctaatactgcttccacactgtgttggcgtgcataattca
ggcgccctgaccgggccgcg
>Pgl_GLEAN_10022172 PgMYB151
ccaaggtctgaggcaaattagttatgaattaactatgttgttcttgtaccatgtttaacc
ttgtttcatgcaaaactctttgagtcgcgagcagagcttgagttacttcttaaccttaat
gtctgggattatgtgaaacctgtgtttgaaaaaatcacaaaagaagtgaacatcctcata
aaaaggctaagcacataaggaggtacaattatactacttaacaaaatctcgagcccattg
aaggtgcgctagaagggcttcaagaatccttggttgcttacgaagagggtgcaaaaagag
ctaataatcctgatggggcatgatctagttcaaccttgttgatgtgctgggtgagtagcc
atacttttgtggatgtcaaaggggcatgcctttgttgatgtgtatggtaagatagcacga
ccatagtaaataatgtgatggactagttaagtcctagcctgatatatggacaagttaacc
ttttgtaataattatctttattcatgtggataagttatcttcatctttgtggacaagtta
tctctcttatgatgtctgttttgtctcagaagatatgtgtgttgattgtgcctgtatgtc
gaaatggaagcaatgagagatggatcgagttgacctgtcaatgaggacagactcaaagga
gacgatgattaacaaatctccgtctcatttgttcactaacgtcgcgctcccgcttcacgg
cagttgagtgctctcagactttaattattgggctctcaaactagtaacgaacgtcaaatg
ctcatcggtaacggactttatagcacgttaacaatacggagtgatcagtaacggaattaa
acagcccgttaccgatagggcgttgataagtaacggactttactagttcgttaccgatag
gtttaacttttgtaacgggctctatttaacgttcgttacaaagaattcatgtaacgggcg
tttaagaagaccgttaccagaagtccacatttgtaacgggcgttgcggaggccaaccccg
gggtcgacctgccgcgcttatctgtaacgggtgtcaagtaacaaccgttacagatgtgag
tacatgttaacgggtgttaagggtacattacaaatgctgcgtgacctatttaaggttttc
acgtaatgaaaaaacgtgcctgaccgccctgctgtggcacgggctcggtcacgtcgttcc
tcgtcgcacgtggcaatcagcgtccacgtacggcgatcggtcgttgatcattcgagttcc
cctcgcccggatcgggcgggtcgccgaaccatagccagttccatgcgtaggcggggtgtg
gagtcgcttcaatccatttctggccggtaggcggccatggcacgaggcaccatcactcca
tcagtagtgatggatcgacaagtggccgcctctacgcacgcacgtgaactcgtcgccgcc
gcgccgatccgtcgcgcaccgaaagcgagggtctacgcgtactgcactacccggtgacga
tgtgtgctcacttctgtgcgctagctgcagcacgcgataaggctagtacagctgtgttgc
agtgttcttcttccactggcaagctgcgagaatggaaatattcaccggccacgaagatgc
cgtggcatatagtttcgaggtggggtagacttggcactttgcttccggaaacggaagcgg
ctcagtggctcagcccgtcagccgaaagcagccattctctttgccccaaacgaggcagtt
ggaagctgcgcaagcagcctgcaactctgcaagccatgccagcagccacaagaaaaacca
tgcatgtggctccaacacaaatgctaacatgtgcgcgataacgtgcacgcaccgctctcc
tgtcgtcggcgcgccgccacgcgcctataaaacgaccgccccgggcgtcgaaggggaacg
ctagatcaactactgcacatcatataattcggtcagttcgattcgattccacggcccact
cgcaaagagctttggcgagg
>Pgl_GLEAN_10030557 PgMYB181
tgataactatcactgccggtttgagccacgaaccgatgataatgccagtttccactacta
gttaagttctctactgtttttttttttttttttgccttcagaggatggatgtccgatgtc
actgtgatggtgtttcactgcccggttcttttaactggcagtgatactagttcggttggg
atagccactgataatttctcggcccattctgacgaaccgtcaatgttcgcttccaatcaa
cgacagctatgtgtttaacttgttgacttgttatgatcgaacatttttgtataatttatt
gccctttgggttaatgatatagtacatgacttttgctgcttgaaaatagtaatattctat
atcgggatgttcacgcatatgacgcgcgcagtggcctcttatttgactaaattttgaagt
acattcacgcatgctctctcttcagactttagagtgatttgttgcacaaaaaattcagtc
aaggatgctgcaaattgcgaagccgcaaaacaaccacttcggacgacgcattaggtgcag
aatgtacaaggatttgaccgccacaccccatgtcactcgctcatgcaactgtggcaacat
catatggacgatctgtgtacgggctgctaaacctttgaacagattttttttaccagcatg
catgcctgctgacagttaggtcaagaatcattaggttctacgaatattttatatcattat
ccgggaaacatgtagcattcctacctaatctttgcttactccccagggtgctgtctccaa
agttcagtgtttcattggctttttgagaaaacagagctgcaaaagccatatgctttgcca
gcagaggtctccctgctgattgattgcttattctttccttcaagtagactatctctggcc
agataattcttgtccaaatcggtaaattactacgcaccacgttgttctgattcaagacag
ttcagtgtcgatcataggcccgtagacggctgcttgagtgaagaaacatctgcatttcgt
atgtactatgcgattgtgtttctgctttggacaaacatgtcaatgatttaaggaagaaat
agaaataaaaatatgattgtagcatgcatgtgtactacgtttaagtcggagatttgttct
tatcacaaagaatagtggtgcacttgttctagcgacgagtttgtatatttttttcgcgat
cctttatcccagtcattcagtgcaaaaggaaggtggtggtgtggagtgtggttcacctcc
agcatgtgtgtgtagtgtgtacatccaacaatttgcccatctctccatgtcactcccctc
tctcgtctaatcccaatagtgcaagggtgacaaattgttcagtcaaacacgctagagaag
aatctaaagagtgggcactatttcaacaaagcctctctctctctctctctctctctctct
ctctctcttctcatagacagagttggaagctttaatttggcccttttggtgtgtaactgc
actagcactacacttggccttcttccccttctcttctccaagcacatacaagaagcaaag
gcagccaaagcaagccaccaaaccaccctctcctacaactacaaaatccacaagtcttag
gactttgggatcagaagctgccccctgatcagacatcgatccctgcatatgattgccaca
agtcattcattataaaagggaggccaccaataagttccctctgtctctgcatgcagctag
ccccccccctctctctcaactagtacttgcaattggtgttcttcttccagctgatcaccc
caacaccttttcttttccaaatcccctacacctacacacccacccacaactttaaggtag
ctgctagtgctagtgcatggctatatatatgcatctataggtaggttgcaccctcccagg
ggatcaccatccatcaccttacaaggtgcagggggggaggcaggccggccacaatcatgt
ctcagaggaaaggggccgcc
>Pgl_GLEAN_10024648 PgMYB188
atcattacctgctgatcaagtgatcattgccacgcagggagctccttgattattgcatcc
caccgccgcgctcaccccgaaacgaaaaagggtctatgtcagtcacccgcgcttatgggc
ccctacggctggaagatcctcaagggctcaaattacacaagggctgaaagcggacaggcc
cgatatagatcgggtgaatatttgggctggactcggtttgcgcgggtccacgatcccaat
ttctcagtgtgctaaatttcgtaaatcttaatcctatcctatcatctgtttgggcttttg
tcctctactatggagtttggcgttgcctatgggctccgaccagggttcgcaaaaccggtg
ggaaccggtccggttcgaccggttcccgatggaactggtccggcccggtacacgaaccgg
tccagttcctaccccaaaaccgtgcctataaattcacgagcgcggtaaaccggtcggttt
gaccggtaaaccgatccggttttccctaccggtgttctggcggtatagttaaccctggct
ccaacccagagcaaaatcggatgagcggggtgcctgcactactgatgagcaccaaaactg
cagaactagagggctatgatcattccagtgtaaaagtatgtctttcttcagatgggagta
atcatttccccaagccgtagctgcaagaatcaccatcacccccataaaaaaaaaagggtc
tgcctgtcaagtaaacctcacgagctgattctggaggtgatccttttgctgaaagctgtc
tcttgtgctgggaccatctcatgattcgctggaacatgcaaaacggatgcgtgaagccat
aagctcttagcctctcacaagataaatagacagatagattaaaaatcttcacctatgctg
gctatgcagcagcgtggcttgctgcagagtaggacgatgaaaatcaggaatggcaatcga
tggaaatctaattggtaccggtagtagtatcatttgtacgaaaattgtgaaactccagcg
gcgtgttcatgcctgcggcaaaggatatggccacgcccaggtggtctcgcctctcggcct
tgcttggagcagcgtctggcgctctgccatcgcctgccggccgggcgaggcgcaacaact
gaaacggcagtctgcaggcacttggtcacttggaccgtgccaatgcatgcagcacgacgc
ctcccctttaccatatctccttcctcccaaacaaaatttcacggttgctactaccacttc
tccaactacctaccaaggctccaacaaaacggaagggagggagtttcagaggattgattg
aatggatgctctgtgtgtgtgggtgggtcctctgcgagcgagacctgaacgttgatccac
agagagcgcctgaattattttggttaccacgacgtcccagtaatttggttaccgaaccat
tctactgcaaaaagggtgctctgggtgttttgttgagtcccggtgtgcgtggtggcctgc
cccggcggccggccctgcacttgcaactgcaaaaagggtgctgtgaaagatggcagaaac
tgcccaggcaggccgacaaaggtggaggaaaaggggaatcatcttcgagatgggaaacca
cgctacaggatcgtcaggtcagtagtacacacgtcttttccccgacacgccctctcctcc
tttcagtttccagtttcactttcacccctcgtgtttgtccaagcaccaccattttttaaa
gactctcccctgctcctgcagactgcagtagagaacgagagaggccaaaagcccgaatgc
caacaaattgctgaaccgatgcaaggacaggtacaagtactactgctcctactacctgct
cccagtcccagcacaacagccagacacttctctccatctgaccatctcgcttgtcctctc
ttctccttgctcctgcgcgtaggggcctagccgcctaggataggaggagcacgcagagaa
aggttggtggtggtgtgccc
>Pgl_GLEAN_10005529 PgMYB161
cttcatttggatgcagaaaggagggagatacgaccaaggttttaaataaccggctaaggc
atttagcggttaactttttaaaggctaaaaaaaaggctatagcgggttataaccgcagct
aagccatttagcggtttttccatacaagtacaaagtttcaaatattcagactactacaaa
ctaaagataagcggatacacatcaatggcatctcaacatttcggaccatctaatcatccc
cagcagaattagaactttcttcatgcattgaactgttatcatcttcatcagaagatgaac
tagaggcttcatgctgatcttcatgcccgtttcagtgtcaacttcgtcatttagcgggct
aaatggtccttatttagctgatttagccggttataacgggttattagcgggttatccagc
ttaaggctaaatggaccatctcctagccttctttctctccaaaggctaaatccggttata
gcggcggctaaatccggttatttaaaaccttggatacgactccaccacgtctgtcattct
gcacccgccaccatgacgtaacggtctcatcagtggcgtaccaaatcacgtgtctctttg
catttcctcgaatctgtgtactgatcgaagttcggactttacgagttcgtttggctggtg
gctgatggctgatgctgatttgtttagagataaaagtattgctggctgattgttggtggc
tgattttttctgagagaaaagtactgctggctggtggctaataagccaaacgaacagggc
ggtagttgataaaacagatcgatggatgcagtatcatgtaatgaattgtaaaagttcatt
cttgaaaatttctgttgtatagtatgatcctttatcactttttaccatatcaagatcgcg
aaaagattcttgtaaattgtaaagttcactcttgaaaatttaggtaaagatcgtgagaag
ctactgctgtgcactgtgcagtttgagccgaacccgacgcccgcgggccgcgggccgcgg
ggcactgccgcccactccaccctagatcgaaatcggacggcgcagggaaaccggaaaggg
atcaggacggctggatgcgggcccggcccagttcgttccgccgcaccaccacacacgcga
gggggggagccgttaggggttcaaactccgggcccgcaacggtaaccgggcggcgttagc
gagcacaacaaaaccgctgtttccgtgatgcagctggccgggcaaccgacgccgccgtca
gccgctccgtcaaacggccgtggcgtccgtcatacgtttcgttccgtctccgagccgctt
tgctctcgtttatctacccaccctcttgctccgacaaaattacataaaaggacaccgcaa
actgatgctgctaacgaaatatatctggcgtccctttgcatgattttaggcaccgagtta
tactacagggttgcacgttttgaaccctcttgagttccagtgaaagcgactctgctgatt
ttaaccacagttatttcgttaagttgggcaaaatagattagaaaatagcatcatacttca
ggggtccattcggaaaagaaggcggctagtaatttatttcgcctgttcctcctcctcttc
ccctgaccttcaacgggcgaggttttttgaaagcatcctctggcctctccccttcaactc
ccccccgacatccaaccgaagccgtagagagaggcagcgaaaagcttgctcttttatacc
ctcctagggtttcgggcctcgcctccctcgcttcgcgccatctcccgcctcccctcgccg
ccgatcgattcgccgcccggagccccaattcgatcccctggtccctcgatctgggatccg
ccagattagtaagccggcgtttcgttcgatctgttttggggggtggttgccccgtgggat
ttgatccgaactttcgttattttggcggtgattttccggttttaggtcctccctgtgatg
aggaggtgatgatgggggcg
>Pgl_GLEAN_10030436 PgMYB175
cgtttcggtccttcaaaagggccaaattgcccctacactaggagttacaacacaagccca
tgcaagtgcgttttggtcaacacatgattaagctcatcgaatctccatcggacggatgcg
catggactacaagcccgcttcactccacgcaagccttgcgatcatgttgtgtgtcctccg
ctttgaagcttctcgatgccctcgagccaaatcggccaggccggttccggtctgtctgct
gcaccaagtcttcgatcttggctttgtggctcagccaaggaacccaatgattttgtggtg
aaccactacaaacctcgcagacttggtgtgtcctccacgccaatcccactcatgacttgg
catccacggtcgtcccggcttggtcttggctttgaggcttaaccaaggaaccgtacatga
cttcgtcttgctgttcttgccaccatgcggcccgctccggatcccgtcggccactgggtc
cctcgaaccaagcttacttgtctctccacacctaaagggccatagacatagacctttcac
ccttgttcttcacatgtaccaacgcaaatcaagtcgcaacctgcacctataatactatga
caagagtcaatccacacaacattgtcaatcactcatcactaaggagcgaccatccaccgg
tcctcggacgcacatacgtcctaaatttggcaagtgaaatatgccaaactgttggagatg
agctctttttttacttgtcatatctttttagaagttgacaaaaatataagatctgccaag
taatttggcaaactgatttcctagttgaaagttgctcttaatactcatttgaatgtggat
gcatatatatggtgcaaactttcaatatggtaggccatgaagggaggcggagctcaccaa
acatatgtcctagtaaacatgaatcaaaacctaaatttcaagggcttcgttcataacacg
tttgtctagattatattctctcatggaaatatcctaaagcacacctcacacccaaactcg
cttccggatagcagggaatatgtaaagtatcatacccgaaaaaaacagagtactttactt
ttgatgcatcacttatgtcaagtagatgcagagagcacacgcacgatcaatctttagttg
gcatatattcatgagtttaacaacaatttgcctctcctctttagaccaactttacttttt
acttgttccgtggcaaacaagtggagttttggatttatgtgcagtaaaatcgttttagtg
ttttgttgcaaaatgtgcactgggcttgaatagttgtcaaataccacataccactagatt
taccttgatgagtagtttcactagaatataatcaggtgtttcctatagatatttttttta
aaaaaaacgtacttgtcaaattgtttcgaaaccatttgttgatgttttgatttttgaatg
ctacttagtatttgtcaccagagtccgggtaccttgtgtctttgtgagttgatccatatc
cgttaggacttagagtagaatcgattccacggcactaattgactaagcggcgaggagcct
gagcctgacccctgttccagccttagcgagccggagaaaggtcgtcgtcgcatcaggtca
acgttcaaaccttcgccaccctgccgaggcgattaaacaactcgcctcaccggcgactgg
gtgatgcaacccaacaccacgcgcacctcctcctgtgcgcggccgcgctaaactatcgcc
attgcggccacatgcctgatattccccgtttgaccaccccaccacgcaacctccccccgc
actccactatataacccacgcgcccaccctgcccttccccccatcgacaacctcgccgca
cgttcacacacacagctctcttgcagtcgcagcatccagctcctccgatcgagctcactc
cctcactcactcaagtagtcaagtctccagctgcttctagctccgatcccttcagctcga
tcgctccggcgtcggccgac
>Pgl_GLEAN_10020166 PgMYB157
attccccactccatgcaagtacaacagctggcggccatgcaagcagctcacctcgacagg
agccttaatgctggtatgaccggctgagcggccatcccatcgccatcatctcccactctg
ccacacgtgagctcagcccaaggcactcaagcacccactacgacgcgcatgagtctagac
ttaggctcggacgtggcaagctaggcaagtactcgggcaggctgaggcaagcgcaaacta
ctcagagaagaagccaagcatcccggaatgaacagtcatacccggccatgcggcggctcc
cacgactaagcgtcacaacttggcttcaatgcatcccgacggacggcgacgtacgacggg
acgtaccagcaaccaagcactgtacctctttttacttccccattgtgccccccccttgtg
actataaaagggggaggagggcaacggttacaagggttagaccatcgaaagaccgaacac
catctcaagggacttaggctcgacactctctctcgaccagcttgtaacccctactacaag
cactcctagctcgggaacacggcagcaccatactggacgtagggtattactcctcggagg
cccgaaccagtctaaatcccgttgtctcccgtgctaaccatccgagcctgacgcatgatc
gatacaaatttattgccgacggtagagaaccctgacaatggctgatctatgatggccttg
aataactacagacatttcatatacactaacacaggagctcaagtcgaacattggcatcta
caactaatcaaagctgacaaaagttgacatgacaacataccatgaatgtgcattagacta
cagaaagacaaaatcaagaatatacaagccggcagcccactaggaaaaaaggacaacaac
aaaattatgttgacaacacaacaaacaacagatgtagccataagctccatatccttatca
attgtgtaagaatgtaacaaaaattagttaaattctaacatgtgcaaaatcaaattaaat
caaatttgtcgtcctactagattaggtgctgatcaaagttcggcacatcgcttcgtattt
gaatccaaattggtaaccactaaaatataatgttttcatcagccatgcaaccacatatat
gacccatcaaatcaagtggcatgaaattaaaattgtcgtttccatagcacgttgcaagaa
atgaagataaagacactaataatccaaacattaaactgattcacacatgcaacgtaaaat
tcaacttctataagaaaccgctccaccattgtccatctgtagtaatgttgcaaggccact
ggccatccgcggcaatgtcacgaggctttctagtgctatctaatcctaattccatggtta
gttgcatttttataataataatcattggttcacaaaacaaggaaagacgcttgggcccaa
ggcaaggatgaactcatgtgaaattgtagtttgggaaggaagagataatgagcaaatgct
acatgacatattgagttattaatacatgatgcaaaaggccaaacatgtatcacgtttgtc
cccgttaaagcttggcccaacttctagtcttgttagcttcctatagaagacatctccagg
gacgctaatttttgacatacaccttgggctgacaattaatttgggcaaggaatattttgg
cccaagtaataaaaggagttaaacaatggaccaaacatagtggacgcccataccaaagta
atccccttccatgggccgtggaagtgagaaaacaagagttgtaacgtcatatttttatat
agtttttgtccattagatgtgaaactgccaaggacgtgaacgggtgatcttgttcccttc
ttttctatattaccaggggtctggatcttcatcttcattctttcatctttcccccatttg
tttcccctgtttcacccactctgaaattccagtctctacaattcacaatcttgcctccaa
acttggaggttctaccgatc
>Pgl_GLEAN_10028934 PgMYB186
tggagaccgagagggagtagtaattaaggaagtaactaaatctgacgcggaaagtgtcat
ggacaaatatgcatgtaggagtacgtcttgattgtgattggaacaaagcattatcattat
tctagccgttttatttttaactcccacatggcacactggcacgtgaaaatgtggtggcgc
gtccctatcaaattaaagcatatatgcatggataaatttcccggccggtcggctgcgtcg
atcgtcacgcacacgcatatggataccggccggccgccgccatgttgttgttgcattctg
aggtcttacagctttgttaattgagtggcacatgtgattacatcttctactgtaagatga
ttcaaccacttaatttcatcaaaatattgttgatttatgcatgcgtgattttaaacgggg
aaaatgggtcaaagacaggagaccatattcgtgcatgtgtgtccatgcatcaagccattc
taagaacaagaaacagctaatgatggagaagataggtctgatacgtgtgcacagtgtgcc
atagctttaccggaatttcagtggattatatcgtcgtcacgggccaaaaaagtgtgtagg
ccagagatgttttccatatcgatttattacatgcatgcacggacgtttcatgtcatatat
ggtgatgtgatggagaggttaggtaataacggccctacacttattatatgtctaacccta
cacatacttccaaaggcttaacaagtcctcctccagtcctcctgcacaaagtgacaggag
agacttttaggtaattcctacctcagataattcgcgcataaataatatatgctgcacacg
taggctaataagtaatccatgtagcaaggaagcaaatctgaaagctaaggaactaatcta
gcaaggtgtaattttcttattggaatgaatgatcttcttggctactatatcttactacgt
tgttcttggccatcagaaagaactgtactatatatattatactactactgccacaatata
taagtgacgttttggagttagccaagtcaacaatttgtaacgttagtcggtataatttgt
tttatgtattaataagttaggaattcgagtaaatttgtcttaagacgtgatggtttcata
atagtctatatacttgcgtttagcatcaatatataaataaaattttattattataaatac
gttttgacaaaaaagtactagtcatcaatttgttgttttgtttagtagatcacactgact
tgagtgagtaaatacatgtttatttcttttactactaatacatataagtaaatagatggt
gctattcgattgtttatcaataattgatctcctataaacactgtgtttatcaataattga
tcaataggtaacataaaaatgtatgtcagaatgtgaccaatcagatcaacgtacccatgg
ctgcagctagcacacttcaaggaaaaaacacaagaataaacatacataagagcacacttt
atgtctcgcaacgcctgtataaagggccatctgcactaatgcagcatgtctgaagcccat
caatgcaagcatcatcatgaaggacgcagctagagacatgagtgtggctgcttttgcgat
ggcagcaagtgcagctgcacgttaaactagcttcttccccggctgcatgctgcctccctg
atccctgattgaacatggatgcttaatgctttacagccattgtcacgcaattacataaga
ctcctgcatatttgtgtatagtaaactattcatgcatgggccactaattatattgcccat
ttgaaataaacaagtgctgcgagatgcagcggcgtctgccccaatttcctatgcacgttt
ctaacaaatcgacagattgtcaccagagcatcggtccggtacttaattcagtgagccaga
ctttatctagtgtgcacatgccattgtgattgctgtgagagcttgctagcaaagtagcaa
gctttgcttggactcaagag
>Pgl_GLEAN_10024574 PgMYB164
gagaatttgacgtgttttcaaatttgaattaaaaatgaaaaaaataaaagaaaaatttct
aaaaatattgcaaggtgcatagaatctaatggtgtcaaaacattttaaatatcagtgcat
ttagtattttttcggggtattagaagttcaaccggccaattttttctccttttacttttt
tagttgaacttctaatgcactcaaactatactaaacgaaccaatatttgaaagttttgac
accattagattctacacaccttgaagtatttttgagaattttgtgagatttttcattttt
tgaattcaaattcaaattttgaattcggaccggttgggaaccggtcggaaccgaaaccgg
tccggaccggttcccaccggtttggttaaccctgcccgctgctcgctccacgggttcttg
ggcaacagattggtcggatgccgctggtctccacaggagtatatggtagctctcatcttg
cagcttgcgtcctgactgttttttttttacttttctttccggatgtgagatgcatatttt
tggagcaaaacaatgcagagatcgaagagccacatgatgcaccaagaactggctgcaaac
atgacgccattaagatgaaccccattcaattcacagaattctcatcttccatccttcaca
tatgtatatatagtacatgcatgcttaattttacaggaagctttgctgaaaacagagaca
caaagacaaacacggaatgcaaacctactcgacttaattgctacacaatctttttaggga
agctacctaaattaggtcctccagcacgtacgtgcttatatgcatgacctttgccgttct
tgtctcttgtctttctctctggcaagtactgcactgtacagtactgtggtagtgaggatt
ccaaagcagaaacctgtggtcgcgcgtttacgtacacgatggttttttttcacatgtaaa
atactataaaacaacacaatcagagagattggtaagtgctagctgatgcttagaaagcat
ttttactggagaatcccctcaagtcatcgtggtgatccaaaattccaaatcatggtcgaa
ctggtagagaggttccacacaggtccagcccttgggggcggttctctcttcctgcagaga
ccagagagagggcacggtaagtaagaacaataaatgtgccaaaaacatatgggctattca
gggctcgagtccaaatatggacgggatagatcaaagcacatcgatcggtcgccattagct
ccacgaattgatactagtctagatggtagctgtgcactaccatgtagcagcactccaatt
cgaatcgaagaaagctgcagcacgaagttatggccgtgccgataaagcggccggtgaaat
ctgaaatctcgctcgcgcacgcatgcaaagcaacaaacactcgcgacactgcacagtgca
cacataggcatcggatgcggcctatcacacacacacgcaccactgcacagtgcacacagg
aaggaggaggggttttgctaaaaccagccaggcatcggtggcgagcccccgtcccacaag
tcttctctcataaaaacgccgcggcgcgagattaccggggtgccctcccggccaccggcc
tcctcccttagccatgaagtcctcggttcggccactcacatttggggtaacctagagagc
ccgtaacatggctgctcacgcgcctagaggggttagctagccggccgctagctagggctc
caaccgcatgcacaggtttggccgacttttcctgcccacgcttttaccctgcttgccgga
cgcatcgatgcattcggcatgcagcagtgtactatactactagctagctgctcgctccct
ctcctctcttcttctttataaccatgcagcactaaagctcgaatggttctggttcattcc
gccctccatttcattccctgtgtgctgggcagcaggccggtggtgggagggggagagaga
tagagtgaagggggcgagag
>Pgl_GLEAN_10015781 PgMYB197
aatcatcagatcggatacgcacagatacgaattcggatgtcactatttaccacattttat
ttcgaattcggatacgaatattatcgaatacgaatacaaaacggatatttcgatttcgga
ttcacattcgaatactcactcgatttacagcatagagttataaatgagtatcatttcatt
tgtcggtgattttataattgatcaaatcatgttacaagtagaaatcatgttacaagtaga
gagtaaattatgatcattatacataatagatatcttattgcaaataacatattaattagt
tagttagttaattaatatatgacaataaatataaaataagtaattttgtaactatataaa
catcttttataagtaaaaataagtacataaatacatttaaatataatttatttatttgct
aaatagtataatgttttaaaattactatgattagacacatcaaaattaattaaaaatatc
attatataatttagtaatattaggttagcataatttttagttgtcatatatataattttc
aatagctaaatgtaaataattattttattagcaatattaaaattaacatcatttgtaatt
agtatttagtaatatgaataaattttagatgttttctatgggtactttacttttgcggat
atgtcggatttttgccggatatttcggataatgtcaaattcggataatattgaaaatctt
aattaatatatgacaataaatataaaataagtaattttgtaactatataaacatctttta
taagtaaaaataagtacataaatacatttaaatataatttatttatttgctaaatagtat
aatgttttaaaattactatgattagacacatcaaaattaattaaaaatatcattatataa
tttagtaatattaggttagcataatttttagttgtcatatatataattttcaatagctaa
atgtaaataattattttattagcaatattaaaattaacatcatttgtaattagtatttag
taatatgaataaattttagatgttttctatgggtactttacttttgcggatatgtcggat
ttttgccggatatttcggataatgtcaaattcggataatattgaaaatcggattcgaata
catccatattaaaaatgaatacgaatacagatatctatattaacgtttttagcagatacg
aatacggataattcagatttccagacatccagatccctatacgtgatcgactctgtccgc
cgagggggcgagcatcgggtcgagattgtgcccatgcatggagccgattcgccgtgccgt
cgtaccgtcgttatcttctgtttctgctctacgggtgttccttgcctgctgtgtgcagac
gacgctccgatccagaacgctcggctagccagcgctggacctgtggtggcactcgtacgg
gccgcagcggttacttttcggggccggccgggaccggaggccgccggtgtccggcccctg
cgtgcgctctccagcaacttttttcacccgatcgatgggctgaatggctggatcatcctt
cccggtggggtgcggggttgcccgccgaacggaagcagagccgttgtcctgcggccctgc
tcctcggaaggccgtggcccgagggtgccgggactggcagccacgtcgcgggcgcggcgc
acaaaggccggcaccgaatcctgttgacttcccgacgccccggctcccgtcgccctcgcg
ccctttataagccatcccccgcgcccccaccccctccctactcgtatgagatctcctgtc
cgcttcctcagttccatttcacacacctgtagctgcacgacgctctcgctagctctccta
cctccatcgatctgctgcgcgcggctccagcctccagctagctagctgcgagacaaaccg
ggccttttccacacgagctgcgtcgtcgtccgtcgtcctcccgagctagcggttcgatcg
gttgatcagtcgatccatcc
>Pgl_GLEAN_10013916 PgMYB198
ctgccttgtgtgcaacgatatgaccaccgagttgcacttgcacgcaccgacactagctgg
gcacctgatcgggcagcagcagcagcagccgccgtacgtgtgcgagttcgtggtctcttg
tgcttcaagctgagtccaggactccaaggccggcagcttccctgcaacgcatccttccaa
ttgcaactggactactggactctcacaagttttaccaactgattagctagctaggatgca
attaacactagtcgtttggtactcttatagctagctaggggcagcggcaaagatccaaga
attggaagatcatccctgctggctctccatcgatcttgagtagaaataacgccatcggtt
tccagcttttgagcccacttcgttattaatcatctcaaggtaaaatgtgatcttggtttg
taggcttttgtcttatagtaattgagaatttgatacctatacatctatcatcttgcactt
tgaaaaaggttcaatggaaaaagtaactcacatttatttattttccatagataattttcg
ataaaccagatccccccccccaataaacagcatttcaatgcagtaaatacaatagaagtt
cctaaactgttccaaattgctccagtagttcatttcaaaggaaagtgctccaagaattat
gtcggatttcattagtccatcaccagttcttcaaatagatcctactccctcagttccaag
ttgtaggtgttttgacttttatatatgcaattttttttgctatgcactccgataataata
tgtgtgaagaatatagaaaaatcaaaatgatacacaatttgaaatggaggaagtaactta
atttgattctatcaccaacttttcttgttcactacatactaggtgcaggggcggagccgg
cggtggggcagccggggctcaagcccctcctaccgccagaaactccattaaatcccaccg
aagcccctctaacaatttttagtcatagataaagaagaggaagaaaaaagagggagaaag
aagaagaactaagggtgaatgagcccccctggctccgtagtctggcttcgccactgacta
ggtggtcaatatgtatacaggaccgacaatgaatcacaagacgccaggtgatttaatttg
accatatgctgccattttttcttgttggctaggtagtcaaagggatcgaaaaatgaatcg
cgagaagccaagcgacttaatttgttcgtgtgacgccaataatatttcctgctagttcgt
cacgtatagtcagtgggacacaaaaattgaaccgcgagaggcaagcaagacttaatttga
ccgcatgatgccaaattttcttgctcactaaaggtgtcaacggagagaagcgaaaatgaa
tcacgagaagacaaaacaagtttaatagcgggccggatgtcactgcggtcaaataaactt
cctcccgctggttacaagtaaatgctgttgaaactggacaatgtcgcaattttgaccaca
caattttactatattgtataatagtttcaaaaccaaataaaattgccgacttgtacaggc
atatctttgcatagtgactcatgtgtccaatctaatttctgagagaaataaaactgcaac
atgttcctgcctctgcaaagataaaatggcatgcatatagccacagatagagagccagag
agagatagaggagagtccagttatttcatctcggttaataaggaactactatatatactg
ttgcttatagcttagctgcctaattgcaattaactaccctttttgagagagatcacacag
ctttatttggtgtttccttgtgtcccgcagatagagatgcacataaaggtcaattcacca
gcaaaaggggttgcgcctttgtgcgtgtgcttcagcctttacatacacactgtgttgggg
ggaggagacgagatagagactgagaggagaggaaactgctaggtagagagagaggaggag
ccgaggaggaggaggcggcc
>Pgl_GLEAN_10001965 PgMYB191
ccatcgtcggtcgtcgtcgtctccctcctccttttggaaagagagatgggttagtgggtt
tggaacactacacgcacgtgcctcttaaccaccatctcaaaattctactgattagtcttc
atccgtttgctgctgttacgtactggtagcccggagacacatcggtagtatactacaaca
ctgtagggagagctagggagagctagctagcactgctagtaggtgctagccaaaaaaaaa
acatcgtcacagccagttcattttgttagatctatcgggcggtgataataagttacatcg
aggtttttttttatggtgctcgaggggaaccgacacgaaccggtgcagtggttcctatat
gctgatagattccacggaggaaaccaagaggaagctcgttaatgtttttctgtaaaatat
tttttgtaaactgacaaaactgcatattggatcttaagtagtgcagccggcaataaacat
aatgtatgatatataactagcttgttcaataatatcggtagtttaaagttggaataaaag
gtcaataaagcgcaaccgtcgggcaagcaccgccttcttctcccatgtactacaattttt
tttttttttggcaagaacaagacaagcggcgagtgaccaaatggccatactaccgtagcg
cacgtagtagtaaaccatataccccgtgacatgtctgaaggaggatgcctcggtgacagg
acacacacacgtcgatcggcgacccttgtggatttggtcaactcgctcgctcggatctat
acacatactacgagtcgacagacagagacagagacagagacagagccatgatcagcaacg
taggagtgagcacacatgatggtttcagggaataatttgacctttgcagccgccacctac
acttacgttacgtgtgcgcatttcatactacggcatgctcgagcacgacgatctaggata
gatgatagattgctaggcatgcagctgcagccggaataagacataccacagagagagata
taaacaaaggcggggggacaagctggctcggcgccggcgacctcaacgacgccacaccgg
ccggttggatgcgagatccaataccatggacgcggatccaggtcaggatgaagcagcact
gcagcagccagcggcaggacagcagcacttgctggcctggccgggagatctatcggcatc
agaggggggagacccgagtctgcggctttgacaaacaggggcacccctgagcctttcgat
ttcaaaactcccggtgtggaagcgaagcgaaaccactctctctctctactggccgtattc
tatactccatcctagctttccataggttttcagttgccatccgatttgcattgctaataa
tcgagggctaatcatctctgaatatatacacctagctatatcttcactagcttgatggaa
aaatttcagtttggtagtgcatacaatcagggcaggaatctgttccgaggaatacaggag
aatgcagtaagaaaacaccatgcggctgtatatatatgtggggttcagaatttcagatat
cagtcatcagtgcaattagcagagcgggcaggaggcgggggaggtcaaagcacccgccca
agttgacgtgtgcgtgaggattagcaccgctggctaattaatctcgcctacgcttttggc
ttttggaatcagctcagctagctagctgctcaatgatcagccagccgatggcataaaaca
agttctccacacttgcggcgtgctccctccctcgactatagcagcagctgctgctgcaga
gtccgtccacgtacgccacgaacccaacccagcaccatcgtcttgtctataaaaggctct
ccatctcccgcccttttcaccataatcctccatactccatcctcggcttagctgtcggac
ggaacgaaatcagctgccgccgctgctgctgctgctgctgctgctgcaagattcacgatt
ggttgtggtgaagattatat
>Pgl_GLEAN_10015650 PgMYB193
nnnnnnnnnnnnnnnnnnnnnnnnnnnnnnnnnnnnnnnnnnnnnnnnnnnnnnnnnnnn
nnnnnnnnnnnnnnnnnnnnnnnnnnnnnnnnnnnnnnnnnnnnnnnnnnnnnnnnnnnn
nnnnnnnnnnnnnnnnnnnnnnnnnnnnnnnnnnnnnnnnnnnnnnnnnnnnnnnnnnnn
nnnnnnnnnnnnnnnnnnnnnnnnnnnnnnnnnnnnnnnnnnnnnnnnnnnnnnnnnnnn
nnnnnnnnnnnnnnnnnnnnnnnnnnnnnnnnnnnnnnnnnnnnnnnnnnnnnnnnnnnn
nnnnnnnnnnnnnnnnnnnnnnnnnnnnnnnnnnnnnnnnnnnnnnnnnnnnnnnnnnnn
nnnnnnnnnnnnnnnnnnnnnnnnnnnnnnnnnnnnnnnnnnnnnnnnnnnnnnnnnnnn
nnnnnnnnnnnnnnnnnnnnnnnnnnnnnnnnnnnnnnnnnnnnnnnnnnnnnnnnnnnn
nnnnnnnnnnnnnnnnnnnnnnnnnnnnnnnnnnnnnnnnnnnnnnnnnnnnnnnnnnnn
nnnnnnnnnnnnnnnnnnnnnnnnnnnnnnnnnnnnnnnnnnnnnnnnnnnnnnnnnnnn
nnnnnnnnnnnnnnnnnnnnnnnnnnnnnnnnnnnnnnnnnnnnnnnnnnnnnnnnnnnn
nnnnnnnnnnnnnnnnnnnnnnnnnnnnnnnnnnnnnnnnnnnnnnnnnnnnnnnnnnnn
nnnnnnnnnnnnnnnccgaccctcgaaagggggccgggcgcaccctcgattccactttcc
cgtgaccttgcaggttaggtaaggggcgctaggccggtggacggccatcccggccactgt
aacggcgcggccgccgtacccacgcatgcgggcgcacgtctgactccgcaggcgcacgcc
caagcactgcagcaaccactccgccaccgcagagctcattgggaaggaacgccgttctgc
ccgctcctgtaccccgtaccggtcatcatcagcacctccctcgaagcctatcagagaacg
ccatcgccgtctgccgcctcctaccctcgaaccgccactgttcgggaacgaagtaggcca
tcatggccggatcgcagcatggatcgttcggacgatcgcccgctctacaccgtagcacga
cgtgctcctacacgtagctaggtagcgcggcgtgcatgtaactcgccgcccccttggcct
ataaaaggggaagcgagcccccagccgcggggggacgaacccagaggaacacagcgcatt
gtgcactcactctcttattctcccataacatctccagccacccaccagggacttggaagc
cacgcttcttctcccaccttgcttgtacttgccccactacaagcacccccggtgctgagc
aatatagtgccacgagcacgccactgctggacgtacggccccctcggccggaaccaggat
aaaccttgtgtcatttgttgcttagcatcgaccatagagggatagacttaggcgttatct
actggttattgtcgggaccatattccgcaccgacaatttgaagctctcttgtcttatttt
agcttattgcgtagtatttgtcatacaaatgaatgcacaataacttttttctcattgtac
aaatctgtataagattagctgagcggagccaaaggaactaaaggagctagccagctaggt
cgatggagctggaaaaaaaatgaaggggtcgagctgaggtcctgaggaagagggagggag
agagtacactgccgatcacacactccctacagtccacagtacagttgcctgcaccttact
tgagagcgacctgccgccctccacgcaccgggctctcttttatacctcaccttcttcccc
cacccttccctctcctcattgtcgccttcttcctccccgagcttcgtcgttcttgctagc
tagctgtcagcaacggccgcaacggccgccgccagagctctcctttgcgcggtcgctcat
cggttgttgggggtggcatc
>Pgl_GLEAN_10019811 PgMYB200
tatttatgcagaagctagtaaaacacaggcacaaagtagaagtgccgacctaccactatt
tttcaatttagacacatcacaccggtctcagccccagttgacaagacaatgaacgctgaa
accattgaatctgtccagaagggagctccagtctcgtctctgttgccatattcttgttgg
tcttgttgggaatttacacgtcaactgattgtaggatttggaggagaaaacatctacatg
ttggcttatctttggccattggtaataagcagtaacaattgtagccctgttagtagtttt
cagtctcagagaacctgtacctctggaattctggtgcagtgaatcaccatcttgttcatc
ttccgatggtacagcatacagtagctgacaatgaaaactaagaatatattccccctacag
ttttccacatcctttaaccactgttggttctgtcgaatctgacgttgtttctggacattg
atgcaaggaacaaagggggcgtgcgaccttgcattggttgtttggcttgccggtcacagc
aagtcaattggtaactacagatgggaggaaggcgacccggacggtatggctgacatgaga
ccctgtccaactcatatgcttctttgctgcgtccttggtcagtcgtcacgtccagcaaag
tcaccccatatgcctagggaggaagaaaccaacaagtggcggggctctcatgccgacgtc
gggctaaagactcaccggtggtcggcagggcagccgcggtcgaaggtgagccccgccatg
cactgacgggagtcgctgcctgtgctctcctagctcgaccctctctacggtagacgacga
cggctgcagcgtatggtgagcgatcgagctatatggagggggccaggcgcacggggttga
gcgccttgtgcgcaaaggcatggcggcgtttgggggcttggggccgcgctgagtgtgcgc
ggctgcgcggaggtgggttttcgcggccggctgacggaatggttgatggaatccttgcgt
aaggatgcaatcggcccgccggcagcgccccgtgggaaacgggagtggcaaagcctgatg
tggcacacaaaactgtagcttttgatcgtgcatggtggggcgcgcgcgtacctgatgctg
ctgccacagctttagttaccccgcgcaacagggcagaaaaggtaaagcgttccgtggagt
tcatcctccatgcgcaacagttgcctccaaccgatatgtgaattggactgcttcttatgg
aatttgccggtattcattcaaaacatgcgtgcgtttcatgttccgtccacaagcacgcac
aagcatatatatgtgtgatttaaaagtcgcgaggcaattcatgacgtgcttggaaaacgt
tggtggctgtcttttaatgcttgatccaaaggccaagttacaatccaacgaatccaagag
tttgttagtattacctgtccagcgcaagggcaggtacgatcagcgaggccaagcaacaag
tactaaccctaggcggggccggcctgccccccttcttgtttcctcgctgcacttgtggcc
ttgtgcgccgtcgccgtcgccaacaggggcagcagcaggcttcgtcaagggaactataaa
accagcccccgcgcgcacgcacgcacgctctcccccttgtttgcggcagttgccaggcac
ctgtcactccgggccctttccttccgatgcttggttagcccgtcgtccaccacctggccc
tgctgctgccccggccaggccgcgaccgcgatcgctcgctcggtcgagcagcacacagca
acagggggggttggtggtggtggtagccggcctcgctcgcgcggcctttttaacaggacc
tcgccgtgacctcgctccctctcttgcccgtgcgcgtcgcggcggcggccacgacgacga
caaggccggccgggttagccggcggcgcgcgcgttgcgaagtctacataatacatataaa
tttgggcttctcgatcgggg
>Pgl_GLEAN_10016737 PgMYB208
cggcgagcgtggcggtgtcgaacaagcgcgggtggtggtggcgagggggagggtccacga
gctcggcggtcgttgggcgtcggtggggaagcctcacgccagcagcgacgctccggccga
ggtgagcgggtgcaacccttagcttcctgcacggcgggtgtaggtggcgagcgcccacga
tgacggaccccacggtgttgctctccaatgatcgtacagtcccgagccaggtgccgaaaa
tcgtggcagcggaagcacgaagtcggccttgtgcatgtcgccaccaggagcttggtggag
aggcatctgaagcactttcggagaacaccgcggggatgcggggagtggcggcaggagtga
cggctgggggttggtgcgcatgttgcgcccggcgttgacggcgtctgcggctggagcggt
tgccgcgcacttcggtgaagccatcggcgtcgacccggggtgggctagcctcacgccatg
ggtggatgtcggggatgcgatgggtcgggtgaggggcggcacggggtgccggctgcaagg
gcagcccgtgtatcaaccttgtctggccgcggctccgttgccggtggcgaccagagcggg
ctccaaggtgtggcccaaggcggtcgtggaccggcctgcggcggccaggctgagccacga
tctacccaccggtcaaggggtgagcttgcagaacgtcacgcgaagatgaggggtctggtg
gtgatggtggtggaggagggagacagcgcaccgcgtcgaggtaggagcacggcgcaccga
gggcgaggtcgtcgtcgtcgttgaggttgtcaacgtcatcggcgacgtcatcctcgagca
ggtcaaggacatcctcgttgtctgagtccgcctagcgcagctccttgggcggccattgtg
ggtcagcgtcgggtagaaggccgcgggtgtgaggggagagggagctgtgcgaccccaact
cctcgacagcgtccgcgcgctcagcatgatgtcgcccgcctgcgagagggttgggggacg
cggtcgccggcgtcgggacggagaagaccaacgtgggggagacagtcggcgtgagggagg
cggacggtgccgaggtggaggnnnnnnnnnngcgcagaggaggcggtcgacgcggaggtg
gcggaggaggaggatgcgaccggcgtagaggtggtgctctacgtggaggaggcagcggtg
gaggaggtcgtcggcgtggaggtcgcggctgtggagatgacgcccggatctagggttccc
gaggccatgggaggtggggggaggaggagggggaaggaagaggcgaggaggggcggcaca
gagggtgcccgccggcggatggccggagcggagggggctagccggcgggagcccgcgtcg
ccattggttggcttgcattgaaagcctttggagaaatctttccggaaaggctaaaacggg
gcccatagtgtaccatgcatgcagatatcctaactaccgaaagatatcagcatggaaatg
aacacattaaggtagttgagagactcatatcaaatgcgccattatatcgattgatcattg
actaattcgttttcctcttaacgttcaagaagaagactcaacaaataaaaatcaaataat
agattcaaataaaagcgcgaaggcttggcatagcagcccgtgctaagcaagcgaaaggga
cccacgagcaacaaccagaccaagccgcaacacggcggtcgggccatcagatgacacgtg
ttccttcgtcctgtacaaggactgcctccattcgctagctcgctcgctagtcgctaccga
ccccgtcgtcgtcttctccctcgctcctcgtcctttatataaaggaacgtggcaacggcg
tctccaccgtgaagctagctgcactcgttgcttgcctagtacttcccacatcgagcaagg
ctacttcgcttacaaccgtttggtagcttgtcgcctttattcgagtctcttgatacccaa
acccaacaagaagctcatca
>Pgl_GLEAN_10016742 PgMYB206
gcatcaaatagatttaccgacgaatttacggtgcatggcgtataccagccaacttactgc
tatacacaaatgatataaaacatggtacaaaaattgttgacatcggaatcttattttaac
agaccctactgcgttgcgcatctagtaaacgaaaccctagacacacccggcaagaaaaca
acagccgccatccatgaaagatggatcaacagagaatcaattcaaaggcttcaggcactg
tttggatggtagggtaaatatttaccccaaggaaaatgatttgcccctcccatttgcccc
aactaatatttgccccttggggtgtttggatggagtggtaaatgtggatgtggatgagag
aggaagagcgggacccaccacaaatttgctccaatttgctaccttttaggggtaaatgga
actaggggcaaaacatttgccccaccacatttgccccacatgtttggcaccttaggggta
aattaggacaaatttgctccatttaccccatttaccccaccatccaaacaagcaccagaa
tgtttaaatattcaaattcaatcggtcagcatatcctccatcctccatcggggctgcggt
ggcacatccttgtgctggggtgagacaagcgctgcgccgtgttgctgccgccgccgctgc
agatagatgcgagatgagctggaatccgatgatggggtgaggaagaatttaagaccataa
gcaacgagaaatcatatatttcaattatatgaccaaaatattttaccaataatatcctta
cacaacccataccaagtatactacctataccacaggtggagattctagtggtatacaact
aatctgaaccgtcagatcttttcatactggtccttttcaaatattggtatatggtggtat
ggtgcaccgtaaaagagccccgcgttcccaactgaagaagctaaatctagagaaggaaga
gcttacgtggttttgggttttacttcataaagaaagtaacattatttgtatcatattccc
tctatcaaaatatttatcttcattttttatatgtttacaattattttttgaataagacga
atgatcaaagttattaataacaactaatattttgatacatagggaatattagaattcctc
cgctgcaaatagataattcttaaagcacaggttgcgagttgcaactgaaaaaattgtaac
atgtaattaactgcattgataaatactaaccgatatagcttacaaatactccctccctcc
aaaaaaaggtcaagaattcttggacaaattaaaaagaggtaaaatgacctccctattcat
taggcatatttgcacatcctaaatgggtaccaatgacctactttttgaggaaaaaaattg
aatctcaagattaccttgttttacagagattataatcatcgaatgacatgctcagttaaa
ctagtagctagtactagatagtaaccacaagtagtccatcatattattggtatgcttgta
cgttttttcccttgaggttgcatggaagctttatggtatcatgtgttgtgttccttaatt
accatgcaaatcctatcatattatcatatactccaaatttatctgcatggtttgattaag
caagttgggaggctaaaatcgacatcaccatcgatcatggactaattcatttccctgaaa
cgttcgagaccggactaaaacaacacataatcttcccgtgcaaatgaagtgtggaagggg
cccacgcccacgacaatgagccgctagagctacagctaccggcccctttgtcttcttctc
cctctcgttgtcctccttcagttcgtcctctataaaggctggtgccgatggcttgtccag
ccgtgaacgaagacaacgggttctcacaggcttgcctgctagtactttccgaagcaagca
aagctagctccctagccacactacttgcatcaccaacgagctcgttgcctttctttgcaa
ctaataactgagagctagca
>Pgl_GLEAN_10016741 PgMYB207
actgacaaaaatcaattggatgcaagcatgtcccgctcgaaaagtcagtcaatactcaat
atacatgccgattgtccatgttcttttgaaagtgatattcaccgtttggttggttggtag
cggctcagctagtcagcttacacaaaggttacagttatcgcctatgaaattggcttatct
ggacgagtttgttaaatttcagaacgtgctcgaattaacaatttgattttctttggtagc
cccgctgaagcaggtcagaattgtggcatatgaaattgtcttttccaaacaagtgatatg
tgttcccctaagttcagaacgtgctccacaaaaggtttgaattttttacacactgcattt
ggtcacaatcactacatttgttgacaaagcatatttatctttctttgaggggtgcatatc
ttagtactagtttatagcatggacaatataagaataaaataatgtttgcatggacacaat
ataagaataaaatatctgagtactagtttggcctcggggccagggtttttttatacgacc
gaaactgcaattttataccgcggtaaccgctcaaaccgctgcggtcttgtttaaaaaaac
gcggtacaaaatatcaaaccgaacctaccaaaccggtgctaacggtttaccgctcagtat
ttgcggtttaccgctcggtttttattcctcaagccgaccacttgtatcacggttaagtta
accctgttttgggcctaggtacaagagtatgtttgtcaacccctacaaccttccatgcat
gacaccagtcaacgttccaacctaccaaattcttgtccaacttaagtactgagtacactg
agaattatttgcgttatctatccgctgccagtttatcatccacatttacatttattagca
atatcccatttgcgtggtttggtagatgacacaaaccctaaagtaataacaggactgagt
tcttcatggtcaaggtcacaataaccatgttatatcctgattgtttcatgttcattagca
atgtcttgtttgcgtagtttggtagataatactcattttagacgtttggtagatgataca
tggaactctaaagtaataacaaacctgaattcttaggttacaataactgcaatatcaaca
gaattacaatatcaatctagagcaggaaaaagatcacgtcataatacaataagattggtt
atgaacttcaaatatatatgattctcaatttggttactgacctcctgtatcagttggtaa
tgcaacctgtgacctgtgtaccctcaaattgttattatttcaccagtggctcgtcttagg
gaaccaacattttggaaccctaataccttggcagatagtaagaaatctaagatagattcc
tagagcattgtttcaaagtggcaaataacttacccatcatgagcttctagctaataggta
gtaacagcaagtagacatttgcatattgtatatcatatctttgtgtccccgtcgatgcaa
atcctaacaaccagaagttagcggcttgagtaatgcaaaatttgtcagccaagaaatcaa
catgttgatcaagcaagttgtgaggcaacgatcgactacccaattaattgctgatggact
aattcataatttgctccttcaacaaacagaaataaaaaaaaactcggttcaaatgaagca
aagcaagcgaaaaggaccccagcagccgggcgaagtggcagcaccgtggccgggtcccac
actccagcctcagcgttccggtgatacacgcgtaccccgtcctggagcagtgcctcgttg
tcttcttctccttcgtccttcctcgtcctttataaaggaaggtggccatggcgtctccac
cgtgaataagctggttcttgcttgcctagtacttcccacatcaagcaaagctacttcttc
gcttgcaacgtgtttgctagcttcttttctgcttcatattcattgcgaaagttggttata
accaactgatcaaatactca
>Pgl_GLEAN_10001403 PgMYB199
ggcctgcccatctgctaaaaataacaaaatttagtgttagatctggagctatggtcactc
aatgacaacaagaaagaagaaacataaacagtgcaaatggaggaccattatggagtgtgg
tgtcccaatcattctggccccaaccaaaactaatggttagggatatttcctctccttgca
cccaaccaaccatggtccatagtttggtaaccatccggaaacgaatatattaggtagaca
aatataatgtaaggccatctggattttgtcgcagatatgtaagttcctcctaacaagtaa
caattaatgatccacctcacgaactcataatttcatctgcttcccatcttccgcataata
ggaatgcccacagccattagttatgcagaatatatcctaattttgtagataattcaaaac
attgataaattccaatattcgtattaatagctgatgagcaatggaatagaatacacacat
gttgaataattggaagaggtcctaatcatagttgatgtattattaaggatcacagataag
gtttaaatattgccatgttgatctgtccatataagtacgatatccacacgatctgccttg
ttgcggaaagataaacgatgcagatgctggagcaatgcgtttggtgaatttttaatctgc
ggctgaccaaacagatgaactaacctatatgatagtagtataaaacaaatgttgcacgcg
gaagtaagttgatcagcgtgtgacaatatctatgattctggaaacaaaattattctagcg
aaaataagctaaacaatacggtgggtggccaataacattcatttaggcagtgccagatgc
caattcctatggactctattttattcagaaataaacaatgaaaatgtccatgattagggc
ttccttagttttggaccctgtccctcttttttttatagtgcaggtatcagcatatgggtt
tctgggtacaccaaaagcatttgccttgttaaacaaagtggtgtcaagatgagtagagct
agtgaggtcaggctgtttattattaaaacacaagaatggcctttatccaactgctactgt
gtcgtattgtacagcagggaatcattttcgtgccggcataatcgtactgcaggatgaaat
tacctgcatggactccatgatcaaattgcactgaacctggtgttcacaaaagaggtgagc
cagatgacacctccccatgcttgtaattctcatgtttacctcctgtgcagggcatttgtg
tttcatggggtgggggtggagggggcccttggcaaatcagcaacagggaaagggagattg
aacctaatccatccgtcgccctaaccaaatcagcaacaggttcgcgtcaggggtggtggt
ggcggtgcggttagttagctgttactaaattaaaaccccccgcgcgcccccatccatctt
gctggagaggaggtaggcatcggccatcggcacccgtcccgttccgtccattcatccatc
agcaccgcaccaggcaccaggccaccaccacacacacggttggcgcgcgcgtcgctcgcc
tcactttacacctacctgcctctgcctgcccgaggttccgccggttccacggccgtggcg
gccggcgcccccgtggcctgttgctttgggtgatggatgaaactggtagtaaaccagtgg
cagtgatgaggtcattggcctggggaagagggaggcctaccggcctgcccggcggtggcg
cggcctacctttttcccaccaactcagcccctctagaagaccttccccgatccagtcaag
tgcctataaaatccaggccccctcctcacccacccttggctctcgcagcaccgtagcagc
agcagcagcaacaacctccactgccggccgcagcccacccagaagggaggcgaagaaagc
ggcggcaaatcaccgggaaaggaaagcggcaagcaacatcgtcggcggcctggtttgtgg
ttttggccgccgccgccgcc
>Pgl_GLEAN_10013323 PgMYB194
atttcatttacagatctaaacaaaacgttatatatttacgtatcggtctggcatggcgct
gaaagtaccaaggtgacacgaggcattcattgtcctagtgccactttattcatgtgccct
ctaccactgtgctaggctgctaccgctagctgccctccctattcacagggattcgtcggt
aggctgcaccggaaagcctccctttattgcgtcgctcccggggaacgtgacgacgcagcg
cccgtcaaacttcgtcagcgtgccatggccagtgacctcggaggtggagaccggatcgcc
ggagtttgtcagttccggggaaggcggtcaaaaaccggcgaccgggttttggctctcaag
ttggtaggagtaaaggcggcctgcagctgcaggctgggcttcacttcactagctaacttc
gttttgatgggacgatggatcggtggctttggctttgtgcattctgcattgtgacgtaaa
tggcgttcgatgtactagagtgctaatatagtagagattagggcttgtttgtcatcgttc
ctcctgtgtcctgcggctagaatagcaacggctcctgtcaaatccgtagatagatgttaa
ttactccaagactatgcaaagactactagtagcatgaaacaaagttgaagtaaaaggtga
ctactagtaggaatgcacgcaccgcacctacaccaagccaaaacaggaatcggaagtgaa
ggatgcacacgacacgactagactacgagatcgatagatcgacgatgtatacgcgacacg
agtgtgggtcgggatcggaggcttttccggaggcacgacaaaaaatgtggttggccatgc
aacgcacctggagttgaattatcctgaccaccaaaacgtcactgcggcagcgagtaggag
tcgcggtagctactactagactagtaggccctagccaccatcgatctcttgacttggtcg
tctgatcaccggaggtggtggtgtgtgtgggatgggaattgcgctggagggcaagcgcac
atgaggttgcctgccgccggtggcgctcgcattgaatccgccgagggccgccggccgggt
ccggccgcgctgcgtagggcaggcaccaggcaggatcaaacgtgtgagggatccggagcg
cagcacagcgctgcacggccccgatcgcatacggccgccgagcgagaggagggcggggtg
gaaaggaaacaacatgccatctgcggccacacgcacccggcgcgcgtttaatgcgacgcg
gcatccgcacacnnnnnnnnnnnnnnnnnnnnnnnnnnnngaggcgggcggctccggccg
gccgggcgaggcaccagaccacacagccaggcaaggcccgggcggccacggccacaggct
ctctactgctcactgcactgtggtactgtaccgccccaccaccaggctgactttgccacg
agctcggagtaaatgcaccctactagctcttcatcatctctccctctctctctctctctc
tctctctctctctctctctctgtggaggagtagctatctttgctgcggctggcctagctg
tctcggcatcctggccgggagagaggccaccaccgctagcccacacgcagcaaaaaggtc
agcgctgttctgtggccgcgacggccaccgttatataaacactcctccacatctcccctt
ggacccttgtcctcaagctcaagccgccaccaccacggcaacagcaaccctcacagatcg
atcgatccacctcggcctgacggctctcccgcttgttcttgtacggcgccggtggctagc
agctactagatagccggccggcctttttgttgttgcccaccaccacctcagttcactcac
atcgcacgccagcctccctcttttgtctgctgatcagagagagagagagagagagagaga
gagagagagagagagagttctcgtctcgcttagcttggtggtgatccatcgatcggtcga
ccgacggcggcgacgacacc
>Pgl_GLEAN_10013308 PgMYB195
cactagttgagcagttgagaggcgtctcacgccaacgtgtcactttgaatgtatttgcct
ctttttcgaacgaactaacagatcaaattcttttttgaatggatacggcgtatttaattc
tattactcctactagtactccagtagatacagatacttcatagtacttgtacgggtgtac
cttacgggacgcagtgtcctgtgtgtctggctactcgcccatctgtcagactttagagta
ctcgacgacgaaaccagtaaactaatctgccgcctgattcaaatgatttgactaattgac
tgagtgagaacccggcacccctgcacggacttctctcttggggggtaaactgtacaactg
cgctgccagagtaaactgaagcctgaacttgaatgattaaatgaaaagaaaagaaaaaca
aaaaacagggtgaaactcaaacttcaaaatttgaaacaaggcggctacgggacccttttc
ggtgcacgacgatgaaccattctcacaagagtcgtatgcttggtatagcctctcggtacc
cttgaaacagtagataaaacgtaggaggagcgtggctccataaaacgactcacacaggaa
ctcacctctctcacctacggcgtgaagcaactcatgtgaacccaattcatcgagtgatgt
atacaatgtacgtacagcaaactctgtcatgccaacattatttttacagtacgtcgatta
ctaacacaaaaaagttatgctagaaaggattttgctgaagtcgaataaggaaatttatgg
tatggatggatgatggttcgtgcattaattaataatgttcaataactacgatttgacgtg
cgatttaactaaaaagttacagtatctcgtatgtctacatttaggaaaaggtcaacacgc
acaccgacttccatgtagttacggttaaaatgatagtgggaaccatcaccatatctctgt
tgtggatggatagttggtgtatgagatatatactacgtgtactgttatgtcaacatatac
tttttgaagtaggatctaatgcagtgttacacgtgttatgtcgatcactaacacggaagt
tctgctaaaaaaaagggtattttgtaaagtaaaatataagaaatttatggtatgggtgga
tgatcattcgtgtattaataatgcgcaataactacaatttgacgcgtgatctaactaaaa
agttatcttgtatgtttccatttagaaaagaaagatcaacaagcacggtatactactaca
ttgaaactgtgcccatgtgattacagtcggagcgaaaacagtaaccattaccatctctgg
ttgcgtagacatgacattttttttaacgaacaagcacatggcatttttgaaactttggta
gcttgttttcccttcgcttttatcgcgtgaaaactaaaacacctacgccctcgcaagact
gtacgtgtatagggaggtcagaatctaaacctctacagtaaccaccaatttgaaataagc
tccgaatctccttaatcttgaaccaaaacttttactcatcgtacttcgcggcacgtgttc
cacagatgagcagccatatagcactgtcagtctcaccactctggcagccgtcccactcct
ccaaagtggcaaagtccaaaggccaggcagcccgttccgttccgttccgttctaccgtgg
gagggagcagttgcatcagttcccaacaggactttccctttcacgcacgtcaccgcccca
cctttaaaaacccaaccccactgcaaaaaaattccccccaccccatccattccttccaca
cccgccgtcagccgtcaccctccttccttccttcccttccgcttcttctgctcctcccct
tggctgcttcctccggagccccgggttcaaaattcctccgttggcgcccaaacgccaaac
cctagccggccggcggggctctccggtcgccgccgcacgccgccgggggcccgcgggcgg
aacatgcgggatctcgagcc
>Pgl_GLEAN_10021026 PgMYB24
ctagaacattggagaactgaatttttgctgcttggcttcaatgattttttgttgagtaaa
tacttattttctgtcgtgcaattttcatgaaaaactatcattatgttaggattttacctc
accaatatatgaggtccatgtcttctggtctcatatcacattttaaaattgtatttatcc
aaatgcaacacattcatctaaaatgatataattttctgtgtctttcaccctatttgacac
gattgtcattcttttctctctactatttttacttggggagtttgatttggtagttttatt
ttgatccatcttgaacaataacaattaggcaatgtgacaaggccaggaagggagcataaa
gtagagatccctcacaatcaactcactaaagcattgcattacatacaccgttgttgtttt
tagatcttcattacaatcaacaccactactaacacttcagcatcaaacacttatatttga
tgttagttgtgccattcaaataaaattcaaatgtaggagtgccatggcaaatattgggat
gttcgcgagtggttagcacatgctgttgaggattatggtttttatttgacaactaacatg
gtcggatgaaaagaatagggcgggaaggaagggtttgtgtaggtgattctattgaatgat
gtaataaaacctacaaacacttaatttaatttgcacacttttacgcaccatggattgcat
ctagcctagtgttgcacccgcggatgaactaggatcatcatagcatcctcagtggctata
taaaggccaaaacttgaccttttggaacgttttatcatgttcttgccaatctaccccctc
ccaccttgatcatgtttggcatttctcatattataaaaacacttgaatattcactgaagg
cacttaagtttgtactgaacctaattactttgtatgcacatagtatattgacaaaggtga
agagaattacaatttacaacaacgtagatctttaatattcccagcggttgcactagctag
gatgtacgatgagtccacgattaatgacactaataacaaaaaaaaagaaaagaaaagcat
atccctaagagccggttccctttgggatggaaccttctcgaccttggcttggcaagtaaa
gccaggcgtcaagagggtcccatgagagaaatcactttcaccagcctgctgcctgcccac
ccacccagctccaaacgcatctccaacagcaaaaccaatcccgctttcccccggacgagg
gtagctcgtagctgtacgccaatctaatcgtgtcatgattgttattgtccccgctcccct
tccctaacctcgcggcagcgcatcgaggccgtccgttgccgcggcaagcggcccggatcc
tcctcatccccggccaacctgaacacaccgacgccaccaccggccaccgcacccccgaaa
tcccccaatcccccccatcagatgcggcgagcgcaactgctgcacaagcataataaactc
ctcagatgcatcccttccccgctgcagatcggagcagcctctcgggtctcgaccagcgag
ggcttgccgctagctttcgctcacccaccagatccacccggctccccggagccgcgctca
attccgctccgccgccgcgcgatcgatccgctctcgctgcccagcacaagcgcgcggatc
ggcggccgagcgagcgccgcgaatggcnaggcgaggcgagattgggtgggcggcgtgtcc
gccccggtctgcccctgggagtttgcgcgaattacggcgcctgccatcggcctctgatcc
tggccgttgatcggtgggctggtattcccgtgaattccgcagcggcccgggggcaaagat
ggtaaaacccgggcgggccaggtaggaagctttgtttggtgtttgttgcttgcgctgcta
gttgccaatctcagttatccttccccctcctctttttttttttggcccccctcgaatatt
aaaaattcggttgttattta
>Pgl_GLEAN_10035698 PgMYB15
taagtacaaattatcaaatgagtaacaaaagtaaattgcagagacggaaatataaacata
tgtttcctgctcaactcatcaacaagaactcagtatatacaatgatgtcacacatggcat
aaccatgacgtcttattgttccaatcaccatgagcaaattagcaaacatattaaacactc
tattcttccaaaaattcatgaggtttctaaccaatatatatacacatatatattagaata
ggggaagttatggtcactatcccccatggctatcgaagaaagctctaaatgggagggaac
cccgcaatatcaacagagatagtgaaggagaaaagagagagatgttccatccttaattga
agagcttgaataatgtaagattaaaaatcttactagtggtcttgaatgtcaacatatgtt
attggtatggttcgaatgaggtacttcttcaaccaaccaaatattatacggatatctaga
gtagaagcacagtgaatcaccatagtaaatagcacacatgaaacagaatgtcctgaattc
gcaagcatactatatacaagaaaaacacttactcttattcttacatatatcaagaacgca
tcaatagtgacaaaaatagctaaatgtggaaaaaaaaaacctcggacatgcttgttttga
tttcaggaagatgacaaaactaagactagaaagcccacaaagcagttctcttgtgcactg
tatgaattgacagaaattgtttttaaaaggacaaaatgggaactagactggccagcattg
gcttacaagtgtttcccttagaacttggtaaaataaaaagcatgactataatgaaccctt
tacctatggaatcaaaatgctgaatactaatgattatgtaacatatacagaaacatagta
cataagtactcttgcattgactggtgatgattacaatcaaagtggtcttgttcaaaagga
gcttatcccacgtaaagagcataaatcgcatggcccaaacttttctggactgcaatgtga
atatgtaccaatcttaggaaaggacactgatagaacttattcttgttcatattccatgca
ctttaaagtagtacaaagggcagaatagaatttatataaaaacttcatttctgtaagcag
aatagctactcgaaaaagtataacagcaagtgccatcgtgtcgcttaaacaaaattagcc
caaactgcatcagattccactataaacaataataaattaaatcatgtaacatagtgcagt
aagactgaactacagtgcagtaagcctaatcattcgtaaataccaacaaaataacctcca
gcaagcaggatagaaaagctactccaaacattttcccctggtgattggtaaggcataaat
tgggaacatctttcacaaactgaacagatcagatagcagaatcatatgccagaaagctac
atatatgataaaagtataacttgcttcatctatggggtgttcatccttatctctatacat
gcgcacgcacatttaaactgaattaaaccagtaaaacatattgaagagaagtaaggtgta
catagcaatcacaggttgaaaatcaaaaatgaagatttctatttgggttattgattccag
aatagctaaagatagcatcttctgttagtaggcttaaagattattcttttgatgtttgtt
cctagatgctagattctatgttttcccatataaagagcacctcgcaaggccctccttatc
aacctgagaaggccaaaagggtatcaacaagcttaaggtaggacaagagtgtgtttgaga
gctagtcagcaggaacaacttaaacgtttgagaacagagaaaaaaggccactggaaaaca
gaggcaagaaaggttccaaaaattttcagtgcccactgtttcattgatataacttctaaa
tattttcattcattctacagcagatgtatcaccaacatcaaggtccgagtgagctcttca
ctacaaggacatcctttcca
>Pgl_GLEAN_10011717 PgMYB28
gaaaaaacaaggcataaagagttctcttttagattttgttgttgaagaagacaaaaatga
atatagaaacctttaccactaaggtcagtctcagtgacagtgttatgaacacacttacca
agtccgacacatcaacttttcaacataatgatcatgtcactctcatgcacatggtcatag
acagtttcatagatagaatgtaacatttaaattgcatttgttgcgatcaaatgcagggtc
atgggctctcagtagagggtcgtgagcattggtatctgtgtcgacctgacgtcatcacca
tgactgtgagatcttctcttccttcatttatttagtgttatgtcattaaaaaaagagtaa
attacgcccaccatacaacaacttgtcaggtgggtgtggattagtccaacaagttgtaaa
atgctcaatttagtacaataacttgtcaggtgggtgtaggttagtccaacaagttgtaaa
atgctcaatttagtacaataacttgtcaagttggtgcatattggtctaaaaccatgtaaa
ataatcaaattagtataacaacatattgatccaagaacttgtgtaaaatacttgattcaa
tgtaataacttggcaaattggtaccacttatagtccaaatttacaaatgataatgtatta
gaaaaatcaagtagcattcaaattttcttccaactaatagtttttgtcgattaaagttaa
tttttgaatcaaatgtatatacattactttttttttattagttaaattgaattaagtttt
tgaattacaccattagattaccgagagactagagttcataagacaccatatgaccttttg
tttcttctgcacctttactcgtgtattcaacaacttcagagaagcgtgcttgttttcgtt
attttagtttattttgtctttcaactaatacatgagactttaaaaatatttatgtcaaac
ttctaatatgtattaattgttagtacaagttaccacattcgtttactagctgagtaaaaa
taatacaatcaaatttgaaactaatactaagtgtgaaattacaaagatttatagtcaaaa
tttaatatttgtataaaaattggtaacaaagacatgatagtaattgcctaaacacctaag
gttctagtccttactagatacctttaccaccgcaacacaaatatcaattgtcaaataatg
cacaataacttgttctgacgcaaatatactctagtctggtattcgaaaaatatattattt
gtaataacatttagattggagatgcatcgattgtgcactaagttaagcaattttacaagc
tcttggaccagtttgcacccacctatcaagttattgcatgagattgatcattttataagt
tgttggactaatctgcacccacctggcaagttaccgtactagattcagcatattacaagt
tattgaactaatttgcactcacttcacaagtcgttgtatggtcaacgcaatttactctat
aactgtgtcgacctgacgtcatcaccatgactgtgagatcttctcttccttcatttattt
agtgttatgtcattaaaaaaaatatgacagtccatttaatatcgatgactttaccactga
gattggactaatgagtttatcgccgttggagataagtctaaacgcgaaatagtctcggag
cctctagttgtccggtccgatggcgatggctgctcggtgagttttttttgtcagtctact
ccaaccagaggaaccgttccccgtccgttggcagcgtccgaattccgaaatttgaacctc
tcacaagcccagagaagcaggtgccatttttactcctattaaaaaatcggcggaaaaggc
ctcccctttggcctgcgcgattcgagatttcggagcaccgcggcggcggccggatcgggg
tggcggcgcggttcggtcgccgctggagcggaagcggatgcgcnnnnnnnnnnnnnnnnn
nnnngcggcgcggcgttccg
>Pgl_GLEAN_10011728 PgMYB27
atatgagtcacaaatcgcaaaagaaaaatcgcgaagctcacatctcaatttgggatgtca
taaaagacaagcgctagctgggatcataaaatgttcaggtactttatacgcgctcccttg
agaaactagaattttcttttgaccaagaactacgtacaaggaaaatccctttaagtttag
atcaggtagattttttatactaaaataccggagattttgcattgctcattcatgttgaaa
tgcacagagttgcgctggcactgctaaaaatgagccaagtttgagcccttctggtgccta
gaaacgagctccgcctctcacacctgtttcgtcttgctcaccccgccattttaaagctgc
gcccgacatctgagatcgcaccagctagctatatcgcgccggaggggcagaagaccgagc
acgatgccgcatctgcgtagcctgatcgcactgctcctggccgccgccacgtactacgtc
gccggcgccgcgccgccgcccggccaaccacccaagggggggctcgtcgtcaccggccgc
gtctactgcgacaactgccgcgccgggttcgagaccaacgcctcgcacaacatcgcaggt
gagacacggcggagcgccattattgccttgaataatgccatcgccgtctgccatcgccat
tgacgacgtcctcgagcccgcgtgcgtggcgtgtgcgtgtgcgtgtgcatgcaggcgcga
cggtgcggatggagtgccggcacttcgagacgatgaagctgcacgacaaggcggacgcga
cgacggacgccggcgggtggtaccggatggacatcggcgacgaccaccaggaggagatct
gcgaggtgatgctggtgaagagccccgaggcggactgcgccgagatcgagcgcttccgcg
accggtcccgcgtcgcgctcacgcgcaacaacggcatggcgcccaacgccgtccgctacg
ccaaccccgtcgctttcttccgcaaggagccgctccccaactgcggcgagatcctccgcg
cctacgccctctacaacgacacgtccgagaacccctgaacctcgagagatcgctgccatt
aacatttggttctcgatctcgtacgtcttccagcagagacgacgacagtatgtagtgaac
gattttgatggacgacgaatggatgttagcaaacagagattttccttagaaataagaaaa
gtatagtttgtgtcctgatttttattggtagttatcgatcaaccttttgtgtgtagctgt
acgtattaataaagctttggcgaacaaaagaggaacaagtaggtactgtattctgcaaat
tcttgatgttcatcatctttgctattaagcttttgaaagtctggattttacaattgagtg
gttgaactgtgcatgcactgcacgatgctgtgtctccggctagatcaatttccacaattt
tgcaaccaactaactttcttcgctggattgagtaaagaaaagaagttcgatcagttcatt
caattaggaagcgtccgactaggcctttctttcaacgaatgtatcattctaatctaccta
cagtgatttaccactaactgtctaatggaacgtatttattctaaaatagaattaccaagt
taaggtcggaattctgaaacgtctttttcatttgattttctgaatatttacattttgggt
atactactaggctttccatctgttcaacggctacagcattggagatttcaggaggttctg
gaaaaggaaaaggcgttcctttcaagcttgggctctagagaactgaaaccggaaagagat
caagtcgtgcgcgtcgtgaattcttccaggatcggctagagctacgagctggatgtgcat
gcggactccaactgcatcgctgtctcttcacagtttcacaccccggtgccggccacgcca
cgcgccgcaaactatatgaggcgaacccggccgccgcatccactctccctgccgccgcaa
ccgcaagaaaccaactgaac
>Pgl_GLEAN_10011787 PgMYB18
tccattcaccagtaaatcatattgaaaattacttctgaagaactgcttgtcctagttcca
attgcagcattttgggcatgttcttttctgaaacatggatcaggctgttaggataggaga
ttactctgatcagaaactggtatgctaatggacgatgtaaataattggctatcaagtaga
ggcaaagaatctaggaactactccgtatgaggcatggaagcattcaatcagagttttggt
ttgcgcacctttgcagttctgacttttcatgaagcacgtccttcagagcatcttgcagag
agccacacagcctattggctgatacgcacattttacgagccgtgttctcagacattgacc
tgcatgtcagtctcatatttcagacagtaaagacaatgtgggcctccatgctgcaacccc
agcatcttgcaagaatcaggcatgacctaataaatatttactgatgtgtttttatcatgg
aaaaagccaacaagccctaatggtagcattagcatggaccctagagaacatatccaattc
cctcttccaaggccctggcaacaagggcaacgtattctcagtccgaaaggggcttaccat
gcctcactttggcacatattcttccaatcttgcatcctgcatggggcatgaatgcaggca
gcccagatcaagccgtttgggtatacaaaaggcttggctttagatttccattgactcacc
atgcaaaagttaaaaccctttacagaccatctgccttggtgaagatgacagagcacaaaa
ctgcaaacttgttcagctaaactcacaggacatgtgaagatttgaccagccactagttac
ttacagagcaaagtcagcttgtagcttagctgggttataagcacatgcatccacagcacc
atgcctttctatcttttggtctctgcaaggatacaaagcagctgctggatacaatggcaa
tacctgatctgataacttatgttgatgttaccctctatgtctatctatttgtattttgta
gtgtcactgtctttgccacctggaaagtagaaattagatcatagtttgagccataaattg
gagctattactttatcactgatccagaggaagcttcacctccttatgtttcacccatgat
ttcagatgtgcctgtgaatctcacatgtgtgtgtgtgcgcgcgcgcttgaacctgataca
tattgttttgacatcttaaaaggagcaatgatactgtggctatcactttgcacgtcagat
gatatgtcggcgcagaactcctatttcttacagtaataagaggcactcctaagtgcctgt
gaatcagaattcagaaaaggaacgagatgtgaaacaaactattgacattgttagtgattc
aaagggctgctgaaatggggtcagaacttcagatcagctgagccccatctcggctgagtg
aaacgcacaggtagaccagaatctagagccttttccctttctaagaaaaatatccctaac
acctgcaagtctgccacaagcttgatatgttagatagggtgatgaagtgcaagcaaaaag
tcatccaaacatcaccaatttaactttaacaatagatgaactcactgctgctatgaccat
aaccataaacttgacacaccaagaaccatttctctgatatcacatgagcatcatgcacca
ccagtcatctcaacacaaaaatcttaagaggtaaaagaaaatctactatttgaattcaga
tcacagactctccatgtcccttggctctgaaaccacccaaccttattctcctcagccacc
attaatcaacaatcatgattccatacaacttacagctcacacacacagcaggcaacccca
gagcctatatatagcagaccttgtgactagagagaccaaaccataagagcttctgaagag
aaaaagacttaagtctagacactagatacaataatccttgcaccaacagaggttaatatc
ttaccaaggatacttcaaac
>Pgl_GLEAN_10020657 PgMYB8
tctcaactaatgagttcataatcatgtatgtagtagcagcacactaacacattgagatac
tatatgattaaatatattccttggagacatgaatcttaatcactaacgttagagtcaagt
gatagtagccctaaccaataaattgtttcttccactatgttttagaaaactggctcattt
acatcattgtttcttacaaaacctagtatcaagaaagggagaaagttctgaaccataaag
ctcgaatacctggactatagtactatatacacaattctaactacccatactgtgaaaagt
ttacttcactatgaagctacagaaaataagacaaaaataatataagtgccatatcactaa
aaaaaagatttgcatatgtgtgtataggagtttaatagctcagtagcatttatagcaaca
agaaataaacaaataatacaatatcttagaaagagatatttcatgtggttaaattattta
gtcatgagacatcatcattgaagctggtgtaattaaattttaaaaaccagacatgttttt
tctaacactatgagctcgagactgatcatatgggtagtagcggtgcagtcatatgtacat
atacacatttgaccatgcagttagacatgcatccatgtgcccctagacacaaaaatggca
acacggcatctatgtttgtccatttgtgtactaggtccagtagtcctagtccttatggat
gtaaacaaagccatgtacatgtacatctccattgtggtctgcgagagagctgcgatgttt
atgtatccatgtctgagatatgtgttggtagtatatacataatatcattaggatatataa
gaatatgcatgccacatctttaagttatcgctaacaaatcattgtctctgactatcagag
cttgttatccaattaattgagacaaggaaaaatagattcactacaagacctatataaata
tcaggccttatggttgcaattctctccattccaacatcctattcatagttcttacaacca
cttattgtgtagtgcagtcttaaactcggtaacccatccatggatcccatgttcaataat
gagtggagtgacaccaatatcagtatggtgaaatcactcattgctagtcaagttgccaac
aacagctttgccaacgacacaaacaatactcacaaagccattatgaaggaactacaagca
tggtttccccaaaaggagaagggtaagttaattgaactgtatgttgagctcctggtggaa
atgatgctgccagtacaaagtggaaaccactctattgtggcaaccaacaaccttgcaaat
gacaactttgggattccgatggaggattgtcggtgttttagaccggcaacctactacggg
gagtacccgaagtagatgattgtgactcgccgagatcggtaactcgaaggaagagacacg
tggcacacaatttagacaggttcgggccgcgaggtgcgtaataccctacgtcctgtatgc
tgcgtacctctggattgattgggtacgattacaagatgatgcaatcttacgtcatgagat
gagatgatctagagttagacacaaaaatggcaacacggcatctatgtttgtccatttgtg
tactaggtccagtagtcctagtccttatggatgtaaacaaagccatgtacatgtacatct
ccattgtggtctgcgagagagctgcgatgtttatgtatccatgtctgagatatgtgttgg
tagtatatacataatatcattaggatatataagaatatgcatgccacatctttaagttat
cgctaacaaatcattgtctctgactatcagagcttgttatccaattaattgagacaagga
aaaatagattcactacaagacctatataaatatcaggccttatggttgcaattctctcca
ttccaacatcctattcatagttcttacaaccacttattgtgtagtgcagtcttaaactcg
gtaacccatccatggatccc
>Pgl_GLEAN_10027871 PgMYB21
atttgaaaaaaaattgaaatatgtcacggaaatttgaaatgaaaaattgaaatttttcat
ttttaaaatttgaaattttcatttttgaaatttgaaatgaaattttctgtttatttttta
aaaaaattggtcatatatcatcaaatggaaatgaaaaaacaattgaaatgaagaaatcat
atattttgtttataccaccgagataaaacttccaataatacccctataccacccatatca
cctatgcataccaccctataccacatgtgcaagttgtggtggtatacaattaatctcagc
cgtcggatcctttcatactggtcattttccaacagtgatatagggtggtatggtccaccg
taaaagagccctttttttaggtagttaaggcgatagtcaaaattttcaagccctatacct
ttcttacctaaccttgataactttcagaacaaaggctggtgctgcattctgttttcttcc
cccgctattgcccagtgtgtagatccaatgaagagtagttaaagagccattttccactag
tcactgcatctaactacttcaatcatttatatgtttgtacccaaccctatttgcttttag
ctgattgcctgattccattttcctagtggaattaggatgtgctattcaaagtggttttga
atgtatttggcttctaattccaactaattatgaatctttataccagctctgagaaacatg
taaattcgttccgtagatttcaatttcaaatggtataagcaatgtatgttatagtgaaac
taaatagtggttgcatcagataacatattaataatgtttggggataaaggtaaatttcaa
tcaagtttttttacactttttgccaattaggtttttgtttgctttagaggactagtataa
cgatttagttgatcaaatttcacccccccccctacttacattgggtaaataatataggaa
aagaaccgttgaccttccaaatccaccctattcatttggctggtgatgatttgttctgag
agaaaagtaccactggttggttggtggtggccgagagaaaaagtaccgttagttggtagc
taataagctaagcgaacagggtagatatcaagtagttctgaactccatgctctgatattc
tcttattgtcagtttgagtggaggcatctgcatttctttctcatcagttgtcagcagatg
acatcccttgatttgattttccttaatttgacataatcacgcatcatcacctcactctct
ctattttttagaaggaaaaaaataataagattagtccaggaccgttgctactactctgga
ctagaacatcagtactgaatcctctggcaatgacatttgattatattatcccaagactcc
aagagtattacactataatctggacaagacggtattatagtattatgaatcctgtatact
gtaatcgacctccaataattatgaaaaacacatcagcatctagagtgctttataaaatct
ttagtccatttctgcaagatacacgtaactaaggatcatattcagttgcaatcatctgac
cttctatgattgaaacgtatttcggaaaaatcccataatgaactgtgtagatttggaagt
gtagatatctatccttctcagtaaaatattaaaaacatctaacaaaatatttgaaagtgc
agatttatatgctgtgtactgactgctgagagtgacatcgcgtagtagtggcagagacca
ctcaacagatacctgtggattctatatgcagctatatggcagaaccatcaaaaagtttgg
catgtccccttctattatacaggagttttttcggttattgcccaaatagcccttgccact
aattctccctcctttattaagccccttagcttcaacaccttacttcatcttacctggcca
cacagaagttgtctctctttcctggtggctcctcccacagtgcagcttctcgggccttgt
tccagccatcgcaattgggc
>Pgl_GLEAN_10038213 PgMYB29
acaatcatcacatttctccttttggggtaatttgcagtgcttggtcgatggggcagatga
gtatctacagcttttggatgctgccagcgagactattcgtgctctttttaacatgccaca
aacgctggtcttctaagagatgtttgcaaagaggaacggtggtgatgactgatgatcatc
atttgcaagacctggaaagcgtctttagatgctgcacagcacagggctccatcgctattc
tgttgttgcgttttccttagatttgtgatgggttagagtgtgtcgaacgtgtctaaagtt
tagctgaattgcgcctgtggatgtccagtatggcatggaatatttttcgtcttacatctt
gtgcgttatatttcctcccttgctccctgatgcattggtggaatatagcagcctagcaac
attccacttttgagagatcccgagactctattagggcgttgtctcgaattttcgcaacgg
cacaagtttttatagcaaaggttgcaacttgcaagcaacatgttacacatggctgtcact
ggtgataaaagtatgcaccaataccatgatatcactagcgtatgattccactagctgata
tcatggtgtttgattgggaatgaattggctgccgctcgttttgtttttggtgacaaattg
catgcaatttaattgggaaaccatttacaactagagaaacgtgcatggtaagagtaaaaa
cacagcaatatcattcctgcattacaaaggcgtgatatagttgtttttttaaaaaaatta
ggaatatagttggtgactataagagcttattctgatgcataattgttatatactaaaaat
aggcatacctctctgccacctactaagggtaaaacagatttctatcaagattccagctaa
ctatcaatgcacatattcaaaggcaaacaccatgtgttgctaattttagtagcaagttag
cattaacttgctactaaaatcaccgatttggaacatttgtctcgtggtccgaattttttt
tttcaaatctagtagagggagaactgaaattcgaacgagctagcaggagtgctactcctc
gatcggttcacagacactccccctcgcacgtgcctcccgaccaacccaaccgtggtcccc
tcgctcgcggccaccactctccgggctcacctccgcttcctccgccgccgcgggcgcccg
gcgacgatgccgcgcaaggcctcctccaactcaggtacgcgccccgctcggcccacctcc
gcgcctcgcaattcccgcacccccaaaaccctaactccctccgccttccattcccgcctc
cccagatgcgcgggccaccaagtggcgcaagcggaagcgcgccgccgccagcccttcccc
gtccaagcagcaggccgaccactctnnnnnnnnnnnnnnnnnnnnnnnnnnnnnnnnnnn
nnnnnnnnnnnnnnnnnnnnnnnnnnnnnnnnnnnnnnnnnnnnnnnnnnnnnnnnnnnn
nnnnnnnnnnnnnnnnnnnnnnnnnnnnnnnnnnnnnnnnnnnnnnnnnnnnnnnnnnnn
nnnnnnnnnnnnnnnnnnnnnnnnnnnnnnnnnnnnnnnnnnnnnnnnnnnnnnnnnnnn
nnnnnnnnnnnnnnnnnnnnnnnnnnnnnnnnnnnnnnnnnnnnnnnnnnnnnnnnnnnn
nnnnnnnnnnnnnnnnnnnnnnnnnnnnnnnnnnnnnnnnnnnnnnnnnnnnnnnnnnnn
nnnnnnnnnnnnnnnnnnnnnnnnnnnnnnnnnnnnnnnnnnnnnnnnnnnnnnnnnnnn
nnnnnnnnnnnnnnnnnnnnnnnnnnnnnnnnnnnnnnnnnnnnnnnnnnnnnnnnnnnn
nnnnnnnnnnnnnnccttcggtgcttgccgtcatcgacgcggagcgcgcggcggccggtg
ccgacggtgctccggccgccctggccacggtacctgttctcgagaacatttcccacggtc
agctccaggtgatctcggct
>Pgl_GLEAN_10027640 PgMYB13
tataaaaagaaaggtatagtaaccccataatctttcatttaatttacccatgcatatcat
tacaaaacataacctaaaataccatttgagatttgtatctaaggttacccggttatgttg
ttattaaaaataatccaaagcaagcaaataaatattaatgttattgtgttcatgtacata
gtacaaaaatgtcgaaaggtaaacttatatatggtttcaaattatccatttatgccattg
ttaatatataattactaggttaagctctatacacatggtggatgtcaccatgtagtccat
ttgttacatgtatgtgtggaagcgatgaaaaaataataatttttatgctaaacacaatat
acgaaggtgcgatacaaatttaagaaaatatgaatgtaaacgaaaaaagtgtatggagta
attacaaatttaaaatcaatcacaactaaatgaaggtaagtacctatctatacaactgta
tggagtattgaataaatgagaaagtagtatggtgaacaatttttattatcatctagaaat
ctaatttctaagtaatttttaaatgtaataatttctaaaaatattagcccgtgcggggct
ccatcttgcaatccactgcaaatttctaaataacctctgaattttctgatccattacccc
caaaatttctcagggtgttgttttttagacggaaaatgcattgatcttagcctattacac
tagcccttttacaaataggaccctcaaataaagaagattacaaagaagttgtccaaactt
ctcatcatcttcctcgaagccttcggagatctgtttgccgccgccaccgaaaccctttcc
aatcatacctgacccagctgcagtataaatatcgaatgctcgctaggtacgggcctctag
caagatcgcaggagaaaaacaagagccaacaaccatggtcgaagactcgaagtgacatgg
ccgctgccattttggaccatggcggcgtggcgaggaggctgatcagaaaatcagaaatgt
aggtactagtattccataaatgcgcataaaaagtaaagtcgcagcggccgagtccgcatt
tcattggcaaaagtggcaagcaacggccaataaagaaaagggcaagcaggcaaggagggg
tcatcacgacgtcgtgcccctgcgctgcgaccacacagaaactattactcctccagcctg
gactgcagaaactcttgctagcgccagcgccaccggggaacgccagcctcgtggtcgagc
ttcccgctgcagcgctgctcgcggccgcggggccggacaatcgcaaacccagcgagcgag
ctcgtgcagagcggcggcagagtgtgtgtgcttgcgagtgagaagagaggcttttctttt
gttgagaggccacgaactgagccacgggctaataggaatcgcccttgggctcgctgcctt
tttgaagcgcgcctggcgtaagggcacccccaacctcgactctacgcatggaaggctcca
tcagaagaaactacattctccgatgcagattttttactatggagtctatttaatattcat
ctcggatcttctactcccgctttattaaataagaggatacgcacatgtgggcagacacac
gggatctgcacggacttcgttttacgtgtagatttggagtctgacttagacttggtatat
ctaagttttcactcctctctcatcattaaattgtttgccacatcagcaatttataggtgg
cagtggcagtatatttaatgactctgaactccaccgagtctgggttgggagtgccgaatt
cgatcgcatgacaccaccgcgagctccataaataccctctcctccccgcccgttcccact
tcccacctccccgccacctcctccccggacctccgctccctgccgccgcccaaggcctct
cgtagaaaggcgatatcttggtcggccctgctgatcggcaggtggcggcgctttctcgat
ccgccggcgtttggagaccg
>Pgl_GLEAN_10001056 PgMYB12
cttagttctttttccggagttgacaagaataaatagattgccttaggatcctttctcgtc
tcgttgaactcccagatcactaggacctctctagttctattatctagatctcctcacgtg
tccatttacccccacatatctttatcatcaccccagctataagactcttttaccgagcct
cgatcctctctaccgttctcgattatctatgccatagttcttcccttgggaaaatataaa
tacgataacccgaataccaccaggtgaagtgctacaacggtaatccgtgtgcttgcggac
ctttttgtgatcgtgtgttttaccactagacgttccctagccctgttagttagtggtgag
gccaaggagcatcaacaggagacattaccccatcatcttacaaggattgaagcacatagg
ggtggtagagcctccgtagaacgtcgaccacgaagatggcggcgatgaagcttgggaaca
cccctaggctgatggcttggagtcctcctctttcttccttccctctgccggtgttgatcc
ttgcgacgaactcatattactctctccctcatcttgcggtggtgactttctggtgaatgg
acgtcgatggaaagattggatgtggcaaccgtcggaggcaggagctacaaatagaccaag
gagggcctaagtcaaatggggctgcgaaccgaggcgaaaagggcctgggccggtcggcat
gggccggccgtcttgggcctgttctggctcagttcgggcctgttctagctcggttcgggc
ctgtcttcctccccacgcctatcttgacattttggacttaaacccctttaattgtatcat
tttggcatcgtcatcctcgcggtcaagataggggttcttctcgcatgaagtccgaacttt
atgtcttagtcctcggggatgatccatcgtaacaccttagtccttgccacctttggaagt
gattttgccttacacttgaacacaaatggaactcctaattttctcctttgaacttgttgt
gactctgtcccttttgtccatgttttcctgtaaaaacacaacacttcctaatgcacatac
aaagttgaacatgctatatcattagtgttcctagtggcgggttagtttcataatcaagct
caacccaaagtgtaatggatatgtttggagcaccaaaatacatcgtcaacaataaacaac
taaacatctataaaccgacagtaacctaataatttgcccacaatgggctagcgaactatc
tcaatatccttttacattaattctcaaaaaaaatctttttacattaaaagttggtggaca
taacaaatattgctgagtgaaaaaagttggcgcatgtacaaaactattgaaaaataatgt
tggtgaatgtaacaaaattaatggaaaatatgggtatatgtatataaaaggattgtcaat
atcaacaaatcatgggaactagattttttcattaaaaatgtatgattattcacttttaat
ttctctatggtatatgttgttgcaatgcataattacatatgggtgcattcttatctgatc
aacatgtactcttggtcgagtttatggtaataatgataattactggactatttgaatact
ttaatacaattgatgtgagtaagatgattgattaccttcatatgacgatagtatgtgggg
aagggggtgttaaggctaagtcgagcgaccattaactacaacacaacaagtcaataatca
tatgataagtgactcgtaaaagcagctcatgtttgtgttcaaggaaaaaaaggaaaaact
atatataatggtatttataaataaataataatattaatttattgttaagacgaacatatg
gtactattagcatatcaggtccaaaacaaaaatttggtagcatatctctctttatatatt
gccagccttacctcatttaggtatctccaggatttattgcttccttccgttaccatctac
acaatccttttgagctagca
>Pgl_GLEAN_10018773 PgMYB11
gaacagtttctagaaagcctatggctttggcagctgcactacactctgcttcatatgctg
attttttgacatcaccattaatagttgttttaccagttgtcctcgaagtgcaagtgtcat
tgacattgatcttgcagctgcctgtaaactgaatgttcccacttagagtgttactgaaac
tggcgtttttgaaaccgagagacaaaagaatctgatcaaggatgcccctctcactaattt
tgatgattacaacatcctacagcaaaaaaacaatatgcagcaatataagaaaagatagcc
agagaggttgcatggtaaaagcaattattacttaatatagaacaagagataaagaagtgt
tacctctgaggaattattagtactacctgtggagcagtgtgcatgctcagtgttagcaga
cttcatttcaacagagatatgatgaagacatgcctcaacctcagacttcagatgaagcag
ttcttcggaaacagcgagttgcaatgggtggccgacatgggaaatggatttttgtgtatt
aacaagaataccgagacatgctttccaattacccaacatattatttaagttgttgaaagt
ctccttgatactagcttccgcctcaaatattttttttctactaactgaagcttctcgaaa
ctacagtctgcgaagcaaactccaaactttgagaagagatagtcggcaactttccttgat
gcattcagatcagccttaggaacactatgagggcttgttccagcaaatgagacgtagttt
tctggaattccacacttgatttcaagtgggaatttagaagcatcaaaactgacatggaca
gttctcaatcctgtttctgctacagttgtgcatacatgcatatcaggaccgttgatttcc
tttacagctttcttgataaacatactgaactttagaaaaaccatacggcttccctgtgtt
taaataaaaaataatactgatcacaggactaataaaaaagcaaataaatgagttctacat
agactacttgagtaaaaaaaagtcacgaaatcgttctttagtgataactgcaaatccaat
gaatcgaagacacacggtttgcatttactcatctacagggcagtagaccaaagagatact
ttctttgacacaaaaacgtatagcacattggcagcaaaaaataacaggggtggtaaacat
atgctgctactaaacataataaaaaatcatctaattaacagagacaaacggataataaaa
aacaacataaagaaataagaaaacaaacctcggcaacttcgctaggaggaaaacctccaa
ctactccaactctgcgcatgcttgtgaggaacgagcggacagctggagaagtgataccgg
cagagtattagaaggattaactagtacatctgaggaacgaaggatgcgcggcggagggaa
atatatgcggaggggacgtagaacagatctgcgaaggggaaggacagtgcggtaagctat
tcaaggaagcagaacccatgagagcgggacagtgcagtgcagatctgaaatagttggcat
tctaccggcgagcgtcggaggtggcggcgagcgtcggaggtggcggcgcgcgagggagaa
agaatgtccctacggcgaccatcggggtgtgagcgtcaaacaagagagacggcggtaggg
tatgacggacggcgaagcggacggtgtaaaaacggagacggaacaaacgtgggaggaggg
gaaagaggcgatgccgtccattcgagtgcgaacggtgagctgatggatatgaccgggaac
gtattgtctcttgtattttcgccagtaccagcacgcacgcgccatatatacggccccccg
cggcgccgcgccccccagcaacagggaaggagagcgagagagagagccctgccgcgctag
ctgctcgctctcgcccgctccacccccgatcgagcagagcactggacgcgacgatcacgc
gacgcggcgaggggggagcc
>Pgl_GLEAN_10004174 PgMYB9
actacccattgtcaaagatgtcatccaccctcaagctcacagtgtacatggacatcatca
caatattaataagtgccataacatagagaaggcaggatagaagccctctaatatagctat
caagaggggagggtcgaatgatagcacaaactgcagtagaaaacttttcatgaaaaaaat
aaattatagatagtacactaaatcatgtctctcttataatgttacttctaaattgattaa
attgtcagaaaataactgatgaaatatgaaggtaacccaattggaatcacgacaatcgca
ggtctacaactcaagatatgaaataaacaagcataacctgatagatggtgacgagggatt
acactacttgagaatcaagcatttgtcccgggctgatttttcatttgtaccgggtatttt
tgccccggtacaaatgtgggcatttgtagcgggtggggaggaggaggccccgacgcgccc
tcacgaggggacacttgtattgagatgtggctccaagtggtacaaatgtgctggcttcac
atttacaccgggcagatccaccacccgataaaaatgtgacgacatttgtactgggtaaaa
agaagacccggtacaaatgtcattctatcgatcccgtggggaggacatagaaaatttttg
ctggcgcctcttgatccctcagcgtcccagccctccgttaattctggttgatgagatgag
atgagatgaagaaaagaaaagaaaagaaacaaaacaaaaagaaaaggtaacaaaaaaaag
ggaagggaaggaggatcagatgaggttgacagcgtcaaaaaacatttgtaccgaggcttg
ttaccacccggtgcaaatgtgtccaccttattggtaccgtagaacctgtaccggttcaat
aaccagtacaaatgagggttatcgaccggtacaaatgagcatttttccagtagcgtgcca
agccctaattttgtgattaaacaaaatattaaagatataatggattaaaattctcaccct
aatgagttcatggtcatttatgaagtggtagcacactaacatactaacatattcgtagat
catgtcattaaatatatttcttgcaagacatggaccttaccaccatggttacagtttaac
tgattgtagccccaaccaagaaattgtttcttataaacctatgtgccagatatccggcta
tttgcatcattgtttcttagattacctaatattaagaaaagagaaaattctgaaaccata
aagcttgaataccgtaaaaaaatctccaaataatataggtgccatatcactagaaaagga
tttgcatatgtatataggatttgaatagttcagtagcatttgtagcaaaaaaaataaaaa
gtaaaacaatatcttagaaatagaaatttcatgtggttaaagaatttagtcacgacacat
catcactgaagacggcgtaaattacaaaaaccagaatttttacggaatcctacgtggctt
tgagaaccaagggtagtggtgtgtacagtcatatgtgcattcacacatttgaccatgcag
atagacaaaagaaaaaggcaatgcggcatctgtgtttgtccatttgtgtactaataagtc
aactagtcccctagttcgtatggatgtaaataaatctacgaacatctgcatctccattgt
tgcctgcgaaaaaagctgccaagtatccatgatgtctgagatatgtgtcggtagtacata
atatcattaggatatattctaaaaaaaaatcattaggatatgaatccgcatgccacatct
tgaagttatcactaacaaatcattgtctttgactatcaaagtttctcaaacaattaattg
agacaagggaaaatagattcaccacaagacctatataaatatcaggccttatggttgcaa
ttctccccattctacatcccattcatagttcgactctcacaaccacttattgtgtagtac
atactcatactccgcgaccc
>Pgl_GLEAN_10004173 PgMYB10
tattagcttttattattttatttaggtttcaaacagtagcatattttgatttgatgaaag
gatagtcatggcgtggggatttccctgtccatggagtctccaaacagcccgaggtggagg
tgggccttcctccccctgcgtggggagggattagatggcgcatggatttccctgttggga
atctaatgcccagggcttggcccccctgtctgccaaatgaggccttaaagaaatattgtc
acatagcaagggggccatggccccaattggccggcagttggctccaccagtgagtggaaa
cacaatttataaattttcaaaccaatgtgaatgaattctctagatataagaacaccaaaa
ccttctagcaccttaaatatatatagacctgacattcactctcaacctcataatcgataa
aagataacactacgtttggatgtagacattgaaccgtggaattgggaattggaatttgag
atcttggaataccacagtttggatgtcatgcgaattggaaatggaaatgaaggccaatac
cgcgaggcattcattctgcttgcgggcacgagcaggcaattcggagccaaccccctccgt
attgcaaggcattgacctcacgaccagtcctcgtcttgcgtccgcctctcgcagaaaaaa
aggggccgagctccctccatccagcgaactccctccccaaatcatcgagttccggcccgc
tcgcagttgggtgaagccgtagctagcgacggcagcccgggcgtggctcgacggagcaga
tgcacaccgtgggtctgggaggagcagatgcgaccccttcttcctcatggtcggtgatcc
tttcttcctcatgaccggcacctcttccgccagatgtgagcggcacgcgggagctccgcc
ccagattaagagggtggccttctaagcgaggtttggacgccttctaccacttcacgagtc
atgacttcgcgcgagctgcgccacccgtacgccggtgtgccgcacgctcccctccgccat
ggtcctgtttcattttcttcctgcatctgcccgtgacccgttcaccgcgccatccgtcca
aattcagaaaaaaattactctgcacatccaaacatgatttggtattcagtaccttgttaa
attcgatccaagaaattcatgtgcctccaaacaatcgcattggtattgtgctcatttcca
aaaccaacttgatttggtattgaactcaattcaataccaaagcgttcaaaatatcgacat
ccaaacgaagcctaaaactaataataggtgccatatccatagataagatttacatatgta
tatagtatttgaacagtacaatatcatttatagaagcaaaaataaactgataatacaata
tattagaaagggatatatttcatgtggttcggtagtttagttacgaaacattgtctttgg
tgatggtgtaaattaccaaaactggacacgtattttttttcaattttatgtgctcaagaa
ctcgtggtactggtcatttgtacatccacacagtagttgaccgtgcagatagacatatat
gcatccacctgttcctggacacaaaaatggctgggctgcatcgatgtttgtccatttgta
cactaagtccactattatattccccatggatggaaataatactagtatatgtacacgtat
atgttcattgtggcctgcgagatagctgcaaagtttacaatatccatgtgtgttatcagt
ttatcacacgtgtgagagatggaagcacataatatcattaagatataaatatgcatgact
ttgacatctttaagacatcactaacaaagcattgtctgactatcaatgttattcgtacaa
ttaattgagatcagaaaaaatagattcactacaaggcctataaataccagggcatatcgt
tgcaattctccccattccaaaatcctattcatagttcttacaaccaattgtgtagtacga
catacttaaccccgcaaccc
>Pgl_GLEAN_10013674 PgMYB16
caccccaggaaaccccgaaccctaaactcgccggagtagctcgccggagttggagaagaa
ggaggtggggtgaagatggagttgaagaaaaattcgtgtgaggagaaactccaaatcacc
caagtgagctatagctttccctttttttccttccgtcccaaaatgattgttacaagtttc
ttcttacaaccgcagcagaaatgaagaattaccttacgcgtcttctctgtcatttatcta
tctctccctatctcgattctcgactacagcgaggtcattattatcaccgagaacgaccag
tggtgccacgcttaactgacggcgaatcatcaattcatcatcatcggtaaatcttgctgc
cgccgcctgcgtactatggaatcagcgttgctgtcagcgtttccagaacagatcgatcga
atccggttagcttgcccgttggtttccccgctagctgatcagcagatatgggatcgacaa
ggcggggacgttcaatccgttgtcatccgggacggaacggggagccgtaaaaacgactga
taccacagccagtaacactgtagtagatggccgtacagtgaacccgggccactgagatga
ctcacgccggcgggcgggcggcccggtgccggtggtgcccgaatttcttctgccacgaca
gtgcaaccccaaccgtcgccggcgccggcggattgacgcggcggccatccatctcggcgt
ttcgtgttaccattaccaccacgtccgatcaacaacatacagagtattattagtctcggc
gtgcgtatctcttgttaaccctgtgttgatcgatgagatgattggggaaattattagcag
gctgtaggaggagtgaggggtgcagtggtggtatgttccccgacgtacggaggggatggg
acgcggaggtcggcaggccatttacgcgcgacgtgattggcgaggccgatggagattagc
gacgtgattagccagcgcaagagtgacccggccggccggccggctgctcctccctccatc
agacagaccatccatcggctccatccagctccgtggtctcagactctcaggttgggaaag
taaaaaaaaagaactaacgggatttgagatttgaattgggcccgggcgtgttcgtggggc
acgtttagttgctgaaaattttaccttttcaacgttttgacctcctgtagcacattatag
cacgtttcgtttgtttgtgataaatattgtccaatcatgacctaactagtctcaaaagat
tcgtctcgtgatgtacaacaaaatcacacatatatcttttggtgtatttaatgtgatgtg
atggagaaagagttgaaaaaatagtaaaattttggcaaatttgtagcctactaaacaagg
ccgcgagtcccgcgggcgcattcatggctttgcagttgccataaccagtgttgagtcact
cttaacagtgtagaaaatcaaaataaaatgcaaagtcacgtcgccaactaacaccgtaag
agagagactttctctctctccattgcagttgcgagccaaaagctctctctagtctctcct
cgctgagcacggcacggcgcggcgcactattttaggccgccaccacctcctcacgaaacg
gaaacgggaggtatcttaagctccaatccattggcgcgctcgctagagggcgcactgcac
cttgcttagaacccacttgatcgcagcctcaccttggctagctgctgctgctcaggcccc
tcctctctcatcttctccctctcaccagggcgagcggagcggcagttcttggtacgcacg
cttccccatatataccccccggccatacatagagctagccgcaagcagccaccgagcacc
tgccggtcatcgccattgcaagtgcaacaacggccaccgacgttgcccttgccccggctt
gtagctaatttatcgccgtcgtcggagtagagagagtgatcgagagagcagcagcagcag
gaggagagaggatcggaaga
>Pgl_GLEAN_10011958 PgMYB20
cctagtttagggggattcgaaaaaaaagcctagtttagggggtaattgtgtcatttagtg
ctagaatcggagcccaagaagaggcagctatgggcttgagatttagatttgtgacctaga
tcaaaacatcgaagttgtgggcctgaatgggcgtttatattggattcctagactgaagcg
gggtacactaataatgttggagtgtcatattactttatagccctagatctaaaaacaata
gtactgttggagcgccaaagttttcagccacatatttttatcaataagaaatagttgaac
taatatttttcaaaatggtaaactaataaattccataaagtaattcctccccaaggaaga
tacaagggaaaccatgccaacatgattagaaggtttttttatcggcggcagcttcctttg
gtgttgttattatgtgtttttgctgttgagcattattggattaaacaaagctggggactg
aaggagaacttcaatcttgcaggccattccacgcatttacctcaagctatggaggaaacc
aaagctagtggatcagacatcattagcattactttttctagtgaccaattaggtagctgt
ccgaaatctccaggctccctgaaacaaatgaaaagcagatcgatagcagaccagcagggc
ccctggaactaaacaaaaccactgccctgccacagtcatatctattcactttccctcgtt
cacaaaataaaccagcaaaagtgatttgagtcatgtgcaatttgtagatgccagtctcca
tcatggactgacaagcacttcgctcaaatctctttgctttaccgggtggatcaaagatcc
ttccagtgagaagaatatcatgctgcaactatgctgagatttattgaatttgttaacaca
aatcgggaggttagtgcagtgacagtggaagatcaccaagaaggaaagcaagaatatatc
caaactactacgtacgtacatgaaaacgacggctccaattattgttatctccgccggcgt
tggcatttcatatggccatacatatatatctgcaactgcaatatggccgttctgtgaagg
tgataattctccaaagaattcagaattgggatagccttccttttcatacatgcaatgcat
accgtggcgagtagatgctcccgctgtggcggctgcggccacagctcgatagcttgcggc
atcgccgccgccgcatgccagagaggaagtgaggccgccgccgccgccgccgccgctggg
ctgaggctcttcggnnnnnnnnnnnnnnnnnnnnnnnnnnnnnnnnnnnnnnnnnnnnnn
nnnnnnnnnnnnnnnnnnnnnnnnnnnnnnnnnnnnnnnnnnnnnnnnnnnnnnnnnnnn
nnnnnnnnnnnnnnnnnnnnnnnnnnnnnnnnnnnnnnnnnnnnnnnnnnnnnnnnnnnn
nnnnnnnnnnnnnnnnnnnnnnnnnnnnnnnnnnnnnnnnnnnnnnnnnnnnnnnnnnnn
nnnnnnnnnnnnnnnnnnnnnnnnnnnnnnnnnnnnnnnnnnnnnnnnnnnnnnnnnnnn
nnnnnnnnnnnnnnnnnnnnnnnnnnnnnnnnnnnnnnnnnnnnnnnnnnnnnnnnnnnn
nnnnnnnnnnnnnnnnnnnnnnnnnnnnnnnnnnnnnnnnnnnnnnnnnnnnnnnnnnnn
nnnnnnnnnnnnnnnnnnnnnnnnnnnnnnnnnnnnnnnnnnnnnnnnnnnnnnnnnnnn
nnnnnnnnnnnnnnnnnnnnnnnnnnnnnnnnnnnnnnnnnnnnnnnnnnnnnnnnnnnn
nnnnnnnnnnnnnnnnnnnnnnnnnnnnnnnnnnnnnnnnnnnnnnnnnnnnnnnnnnnn
nggactgcctgagcctgcagggttgttcggctcccgcctacggtctcgtcgcggctcctc
tgcttctgtcgccgtcgcggtcgtcggctctgctcctgtcgatcgacgagtgctcgacgg
agagagccaccgacggaggc
>Pgl_GLEAN_10025716 PgMYB14
aagatttttgggcaagaagtgatttttttttgccagggcatatgccccgacgatggcagg
attccaacatccaacgtgaacgagctctttagatccacgtgtgttgggatagcacgcatt
tcacatcacatatatacaagcactaaaaaaggcttacacctgaccctctcctgcctcgct
cgttcgcaagattggaacaaattccgtgaccaactcgtacagtcgcactactgagcatct
cgccgttttgtcaaaccaacgtctgtctgtatcagtagcaaacaaacaaaaaaactcgag
acgctggacgtcactacgtcagcatcccccgcggcacgtaaaagaaacagacaaacaaaa
aagaccggggcggtggccggtgggcaaccgaaacggatcgcagccgctgaccggccttgg
cagggacggccacggagccgttaggggggtttcggttggtttgcttcaaaccctggtgcg
tgcagcgtgcccggcagatcgcgcgggggcgggcgtgggggcgtggtcgcaagccgcatc
gacgcgtcgtgagccgccagcttttgcgccgaggccacaccccgacggggcaccgccgtc
gcgccgtgaaattccactcgtcgctttctttggtgtttgcctttgcctgccctcccgatg
ccgacggaatcgaaggagggtgcctgccctcccgattgatcacgccttcgcttcgtcttc
tgctgcgtttcgcttcacccctcgaaagatggatggatcgctgtatggtcctcttgttac
ggaactgcatctcccaataggaaacagcttagttgctctggatctgcaccactttatgct
tatctaactcgtgtcttctagtaattcgaaaaaaaactcgtgtcttctagaaaaaaaaag
ttgttttgcgcgcaacttaaatatttgcttacaaactaattttttttatgaggaactaaa
atggattttgtgattaactttgttcctttgattgaatgatttaatcctaggtacacatat
ttgcattagtgacacttgtgagacgtaactacttttttgcacaggacgttacacttttaa
gtagatgaaatagaaaaacaaaacacctgaggaagtttctggaggcacctaaaggcttta
gctgctcaaattgttttgagacgacatcaatcgcataagttttctcattctcattatgca
gcctgatttctgtagaatctcaggttagctatatttctttctgaatccaaacggagattt
aatttccagaatcttgagaacgcgctgtacaattaaatcagtatatggcacagtgcgtag
ctgaagaatttattgcaagccataatgaattgcgaataacaagtgatatacttctatata
tactccacctctgacttggtagacagctttctgccttgaaaattttctatataaacacgc
tgatccgtcagaccgtcaccatttcttgtggtgtgacgaaaatgtcagttacgaaaatgg
agtagtagttggcattcagcttcagtacaaatctcggcaacaataacgaaatgctcaggg
tgttaagtgcaaacgctagaagttaattattcctcgccactttcgctcaacgggcgaggt
tttttgaaagccgcctccttcctatcgtccccttctccggctcttcctctaccccccaac
gcgcaactgaagccgcccgcgacggggacggaacccggcaaaacgctcgcgctttcgcgc
cgcctagggtttcgggccgccccgcctcgcctctcctctcctcgcgcccccttggcgcca
tcaccggcagcccccggttcgatcctctcgacttcccgttcctccgtttcgtacagcgtc
ggcggcaccctccttcgattccgtctttccagccgtttccgtggggaattttcactgaaa
gcttgttttttcctccatttcctgtgttgttgtaggtgtctacggcgttgatgaggtagt
tgcggcggtagatggccgcg
>Pgl_GLEAN_10005188 PgMYB39
cgctagacgtcgaatctgtcgacgcttgtcgagatctcccggtggttcgccacctctcga
caactcccggccgcctccgcctctcgagatctctcggtcgccgccgaaacgcctctgtac
gaactcgccggcactctccctcacctccctccgcctcaaaaaaaaagctcgcgctagaga
tcaactagcctagcctcctctccaaaaacctcacgctcccccgccgtgggcgccgccgct
tcacctctctcgccgtgcggggtggcttaaagggcgagcagtggacgagtcgccaccctc
gtctccctcgtcggtggaaaactctagatctgctttctctatcttcgcacggctcccaaa
attcgaatgaaatgagagggcgccgcatacatttctgacgagtggggcccctaatgaaaa
cacggcgcatccagaagctggaccgattcgctttcccaccgcgtcatcggatcagaaaat
gacggagatggcgtggggtctcggtggaagacaaaacggagagccctctccaactaggat
tcgcgttggccgaaataacttctcctaactgtgtaagtagataaaatggtgaaatgttca
caataccccttccttctttttcctatatttgcttctttctttttctatatcttttccttc
ctactatttcttttttcctgccttatcatctcgtggaagcagagctgcccgccgacagct
agccagttcgtttggcttatcagccaccagacaacagtatttttctttctgaacaaacca
gccactaccaaccatccagcagtacttttctctcataccaaatcagcatcagcaaccagc
caccagacaaacaaacaggcttagcatcacaacagccgcctgccaaagcaaagctgcgtg
ttgtcgccggccttgccgctcattcgaaacctagggtcaccgccggagcacaccaccgag
ccgcacgctcgctgcccatctccgtcctcacactcacgcctgaagggctcctgacgccaa
ccccgagccggccatcctcaccgcccgaagcagaaaaccattgtcggctgctcaatccac
cgcgtccaagcgtcttcggagcaattcagcgccaccaaaagaaccacatcatcgagctgc
atccatttcgccccttctcgccgccggagaactgctggagcactgccacgcctggggtct
gaggcggcccctgtctccaccgctacggcttcaatccggtcgatttaggccccccaaggt
cctctgtccgccggccatggcgccctgccttgcgcaaccacctgcacccaccgacaccgc
tcgagctcccgccaccacatgcgcactcgcggagccgcggccggagccggcggagccacg
tttttttggctccggcacctccaaactgctccagagagcggaatttgaggggctctcaca
ccggagccgccgcgaaaactcccatttggtagggcttcacgtgaccgatcttgaagccga
ttttggagccctcccggggggccttcatttggtgggagagatgaagcacgatttgtgcct
gcaaaacatgtgaggacggaaccttgcaggggagtcgatcggagaagcccaaaatggtga
ctctttcacctaactcaacgtccaagaacggcctaaacaccaccggaatggcaccgtgac
agcgacctgagctcccgacgaggagaggctggccggccgccgcaggcctaacacgcgcgg
aattcacaccccatgcacgccgagcacatgcgctgcattgtccacacgtttgctcatact
gaacgcggcggctccgatccctataaatgctggcgcatactgaacactactggcaccaag
aactctcaagcctcaactcccatctcctacgttctctgctgctgctgctgctgctgctgc
tgctgctgctgctgctgctgctcgagaaagaggagaggacgagcgaaacagagacccgga
cacagaccgagacagagagg
>Pgl_GLEAN_10016698 PgMYB64
tagctttttcagtaattggaaactacgatgaaaacctgactacatatatagggtttttca
ttttcattaatttttttgggttaatttgtattggagagcgtaaaaaaatccgaccgcgct
agccgccacgaggcgaatcatgagatttaacactttttggtagcattatatggcctatat
atgagctcccttttctactggcgaaatagaaggttcattcgctacctagtacagtacttg
ttaggccatttgaatctcaataactttgtgatccggctacttcatttgcccttgacattg
acttccgtacgtatcttataccattacaagctgcttaattttcactttactacagaaaaa
attaatgaaaaattgctagcatttgtgaccacgagatcccgtgatggcaaatgcaagttg
acgtgctgttgattccgcagaatattgccagggaatactcattagaaaaatagcagaaaa
agaatattatcacaagcacagccacagggtgtttcgagccaataatgtactcgtacctga
cggcacttggggacaggatttgtattttaaattcaagcagccattttcatgcgcgcattt
gattaagcgtttttggacggcggattagcgaagcacgtagtatgatctaatgtatatgct
tagtttttgaaaaaaaaaggaaatattcaattattgcgtgccttgatttgggaaaattcc
acagagtggaaaaaggaaatgaataaaggatgtctagagcacaaaaaataaaacaaaaat
tcctgatggcaacagccaacagcaaagtgctttccttccgtggaaaggattaaattaaac
atctggatctccttcctatcgcagtgtgtgtatacgcgagagctgtggagtagtagtagt
agatctgtgatcccgtggaacgaagtgtggaagccggctaatcatcccagggatgacgcc
gagctgtcgtgcatcactaatcaatcttatcgcgagctttgtttaatcgagcccccataa
accggcgagctttgcattgggcctggccagctcgaaccacgtcagcatcaactacgggcg
aaaaagaaatgcttgtctgacctgatttattcgggtagatccaaaactggagctatcctc
cctcaccacttttgtcgccgcaatcttccaaaaaaaaaacaatcaaatgatttatcaggg
agtttttacggcgaaattcttttctactcgctcacacgagaatgcgtaacacatcaatca
tcaactcaaggtgacatatcacctacttggaacgtacaaatctgtatttttctagtacaa
tctgcatatatatatatatacacacacaaggggaaaatattttgaattttaaggagaacc
taaatcagatacaattttaatatttggagaataaaaaccgcagccatgtgtttattgccg
tgacagaaatgtgttgcagggagccttgtccacaaatgcaaaatgggaaaatccaaaagg
cgactccaaacggacccaaaagagacggtggcgcgtacacacgcggaatacacccacacg
gccaacccgtgggtgttggatggatggaatggatagcatataaaggcctgaataaatggc
aagaaatttggaagcgtaaaaggaaacgaaagggggccgaaaaaaaggttaccatctttg
cactgcatgagctcgcccccaatccattccattcaccatccatctctcctcctcctctca
cctcctcttattattgagttcttcgttcacctcacccctctctttctctctctctctctc
ggtctctggtgtgctgctgctctcccctgctttgaccttgctggctttatccgccatccc
cccgccctttcttggatttctaggatccaagaagctccctcgcgtacaaggagtccggtg
atccgggcgggcgcctactaggtttcttgattccttgcggtgctgttggattcgtgtagc
cggagcccggaggtgaggag
>Pgl_GLEAN_10023163 PgMYB60
ggtgggatcgctgcccatcttggtcttgcggatcaccaacggcctggcgatgatctcgct
tgtctacctctgtagcgacagggaacactcgctccgcttcccgctcggcggccgcgagtt
tgccaccgtgctctgcaagctcgcctctgtcgtgtacctcctaggcctctttagcagccc
ctccttcgggcaacccagggcccctgccagcgacgacgaggagagcagctccacgcgccg
ggagcgtgtcgnnnnnnnnnnnnnnnnnnnnnnnnnnnnnnnnnnnnnnnnnnnnnnnnn
nnnnnnnnnnnnnnnnnnnnnnnnnnnnnnnnnnnnnnnnnnnnnnnnnnnnnnnnnnnn
nnnnnnnnnnnnnnnnnnnnnnnnnnnnnnnnnnnnnnnnnnnnnnnnnnnnnnnnnnnn
nnnnnnnnnnnnnnnnnnnnnngcccgtgccaatgcatgtcggtgtggacggcggggacg
aggagatcgtcaccgctgtggtgttcggggtgttgccgtcacaccacctcgagtcacgcc
ttgggactgcagccgcgcggccatgccgcggcgggaggcgctccagcagatcatggggcg
gggtgtcgaggggctcccgctcgatcaaatggactaccagaccatccacgggcaatgctg
cgagatgcccgtcgggtacgtgcaggtcccggtgggggtcgacggcccgttgctcctaaa
cgggcgccagtaccatgtccccgtagctaccaccgagggatatctcatggctagcgtcaa
ccgcgggtgcaaggccatcgcggcgtctggtggcgccgttcagtgcgctgctcaggatgc
catgtctcgtgcgtcagtcgtcaagctgccatcggccaagagggcagcagatctcaagac
gttcgttgaggcagctgccaattttgagaatctggcttctatcttcaataaggaggcggc
cttctgctcttttgtattcttctgatcttctatctttaaaatgaaatatttggtatttta
aagttttttttagagattatgattttacaatgaaatctttggtattttaaagttttttaa
gagacttttttaaaataactaaatcaatttagtgggagcccatcaagtatacgggttcat
ttatcattatatcggttgtatcgatatagcacgtgtgtcgcacttgcgtgtcgcacatgt
tgtgttactagtttagtaaataaattagataaataaaatgagtataggtattgccataaa
tacttaaattttacttatgaatttgtcattttcccaaaatatttatagaaaaatcaaaat
caaatgaataaaaaagtcagtgtatatcttttggagccggaagttaccgccgtaactact
ccaagcttccagtcagcgcgtgtgctacttactcgtgctacgggacagttggcgcgtgtt
gccacgcttcttgaactcctcgccgtacgaatccaattcgtgtcaccgtatgctctgcgg
aagtgcggcctgctcctcacctcgcatcccaaattcacctcgccggcggccaggtcgtcg
cggcctcgcgccggcaccgacggccatcacccaccaagccctcttcgccaggatcgcgcc
ccgcgcccagcacaccgccgagcccgagcgccccttccaccgaagcaggtccgcctcgaa
ctcctcgccaagtcgctgctgctctcctgctcctggtccgccccgctaccggcaccggaa
atgcagatccgcccggacccggatcgattccttcttctgtgagcaatcatgcgcccatca
ccgtaccgatttggaggccgcgctggagtagtgctgttgccagtttattccccccaaaaa
aaggaataattgggggtcaacgtcaaccaccatgcgctagtaaatgtgatgtgccaccgt
tcttatctctaatcacctgtctgatcccagcttcaggctatgcttctggtggaatcggag
cctcatctctgaccgcagcc
>Pgl_GLEAN_10013746 PgMYB35
aggatagatggctacacctgatcaccataattcaccaccaccatcgtcatcttgtgctac
ctggctagctagacgaccgatgcaagcaacaactcttcgccggtgtcgctctccatccct
ctcgctcgtaccagctagcagcagggcacagagcgcgcggcagctagtgctccgcaccgt
gttgtcgcattccgccacattcactacgcgctagctgcagagccggccggggcagcgtcc
ggcgtccgtgccacaccacggcaaccaccacggcggacggcgggacgggaacacgacggt
cgacgggagaacgcgtagcttttcccctttcatgaatatggaaagatccccagcggcctc
gcccgggggccattatgcctctgttttgctggaaacgtcgtgcaccctcaaagttaagag
ccccgttttttacacacctcttccttggtcctgcagtgcagctagctgcagcagaccaat
ctttgcagatcaaaaggcgacctatctttgcagctagtagctccaatgggtagccctggc
tggcttggattggtgtcggacactcagaccctaccatgtttattcaagtcagtggcttgc
ttttgcactcgctcgctccctcaccagtacttagatatgagaagacccatctcaagtcaa
tgtgctagacaagctctaaaaacactcatctactgttggtttttggctaaataagcatat
atggtacccccatatacagtatgtagtactactagataggatatctaaaaccacactaaa
tatatgctggcatgactgcgaaaaccagaattggagcccacacacttgtccatattgttc
tttatggtcctactaatagtgtccagctcttagacttttgaccgaccaatgtgttctcta
ttgcatgaaaattactttagtacctcttggcatccaaaataacctacatatcattaacct
aacattacgatcctcctccctgaccccttaatgaaaaacactgatcacttcttactgtca
gtacattgctgggataactgtcagtgcagtgtgtagtggaatgaactgtccggtcaaacc
atgatgctgcactttttcactcttgatgatcacttctcatacatggcatgattcacgaaa
acaaaatgttttttcagcggcaaatggtcagcagcaccaactaaacctgcttaaaaatta
agctgttgttcatgattacaaaaacattctcttgtactatttcccaactatagtcaacag
gtagagtataaagtagtttacccacccgaagtatcatggtacgagggacgagctactata
cgttttgagcattcaccacatataccagcacggtacacatatatacgtcccaatgtcaga
ttgcacatgaagaactggaacaacggctgtagcaccattatggcattgtggccttcaagt
accagcaccttcagcttatacgccctacacccttctttaagcagcattcccaagggacca
aatcatacaccactcatgacctaatcagcacacacaacttctttcgcccctcatcagtca
tcactaccccccagactctaagcctctctctccttaatttttccctcaccgtggctctct
ctcaaactccttttcacttgccactttgctcaaatccaccatccccttccccacaccacg
cctctctttctctttctcagtgtctgtaccactgtcctgactttgccatttctctctctc
ctcatctcctttcctctctcgttctaccatcttctttcctcttctttgatcaccggccgc
gcgcggaccaccgctgatataactacttcctaccctccatgaccatggcctccgcttgat
tcaacaaatatatgatcgcctgatcgcaagaaggaggcagtcgtgggttggctagctagg
atcttgattccgtccttcatttcgatcgttaaggtggtagctgcaaataaagctgtgact
tttcattgcttgatcttcca
>Pgl_GLEAN_10021368 PgMYB48
gccattctcttgatttcataccagcatctcattggactagaggtattcttggatagaaaa
ttaccaaagcgtctaaaattaggccatctatataaaatgagtatcttgagtgtgaattgt
gaaattaccggtttttatggaaatcgtatggtcaaaatgaactagaattgcagaaagaat
atgtgcactggctctaaaattaccagtactctgcatatgtcatcataacactaaactagc
attacaaaagcaaagagtccactggatttgaaatgatgaaatcttttaaccttggacacc
caatatagatgcatgtggaaactacgataaaatgtctgcctgctagtgtacatcgactaa
agttcattattaatacatgtgaaatgtgaacaggactaatggaattttggaaatgtgact
agaacaatggtgctggaacatcttcattcagttcatccatcacaatagctaatgcacaag
acatgagttatggtagtcttggataggggaggaaaatcaccaagcatctaaaattaggcg
aagcagtcggttaaaccatcaaaatggttccttcattgggtcactggatcgaggtaaatc
gctacaatttgggactctatgggaccaatgggatgcaagatggccaaaaaaatgaaatgc
agctacagctgacctgcggggcagtcgatgaggatgaacgcgggcgggttgggcgcgcgc
cgtagcgcgtcggcgacccaggtgagggtcttggatccgaaggcgaggggcagcttggag
cggggcttggagaggcagagtaagtggaggtcctggagcgcgcggtggcggacgagcgcc
tggtcgaggcggcagtccccggcgaggacgtcggcggctgtgaggtggacgcggttctcg
agtccgagcaggaggtcgaggttgcggaggccggcgtcggcgtcgacggctacggcgggg
agggagaggcgcgcnnnnnnnnnnnnnnnnnnnnnnnnnnnnnnnnnnnnnnnnnnnnnn
nnnnnnnnnnnnnnnnnnnnnnnnnnnnnnnnnnnnnnnnnnnnnnnnnnnnnnnnnnnn
nnnnnnnnnnnnnnnnnnnnnnnnnnnnnnnnnnnnnnnnnnnnnnnnnnnnnnnnnnnn
nnnnnnnnnnnnnnnnnnnnnnnnnnnnnnnnnnnnnnnnnnnnnnnnnnnnnnnnnnnn
nnnnnnnnnnnnnnnnnnnnnnnnnntgccggcgcggggaggggcaggaggcgcggcggc
gcgaacgccatcctgctagggttttgggagggaggtcagtccgagggggaggccgcgacc
atggctgctgatgctgatgctgctgcctacagtgacggaagcctgtttggttttgagcaa
atttcgcaagtgtaaactcgaaatttctgcggggatttgagcgcaaatttcttctctctc
tctgtttttttttttgcatgaaacaacaacgctggttatgggccgctggtggtgggcctt
caaaaaggcacgcagctcaaggaaggcccgggaggagagagaggtgtgagaatggttggt
tagttgtggtggggcccgggtgccagtgtgagtaagaaacttgtggccaggagaagagcc
cgcgagggggagtcgtcgcgtcgcgtcggctgtcttgtcttcctcttccccaccacaggc
caccatcaccaagccagccagctgtactcttcctcctcttccgcatcgcagcagagcgcc
gccggcagcagcgggtcaccgccaaccctagcttcgcttgagctgaggcagcagcgccgt
cgaggaggtcgcctgatggtgtccatgagcacgacgccgcaccctctcgattcgtccgtc
ccgggcgtcggaggcggcggcggcggcggcagcggcgggnnnnnnnnnnnnnnnnnnnnn
nnnnnnnnnnnnnnnnnnnnnnnnnnnnnnnnnnnnnnnnnnnnnnnnnnnnnnnnnnnn
nnnnggtgcgcctggtgcag
>Pgl_GLEAN_10020538 PgMYB66
ttatgtgcatgatcttttagttgtccgtagcaacgcacgggcattacactagtccctcta
caaatttcacatgttcatctgctgcttattactcctactatcggccagtaataaaaataa
ttaacgctgctgagagaaaggaaaaaccgtctttttttggatgatcaaatgtacattcca
aataagcccttaaaattcatacgttcatctgcttcttattactagcggccagcaataaaa
aaaattaaagccgctgagagtaagaagaaaaaccgtctttctgggatgggatgatcaaat
gtagattccaaataagcccttacaattcagttgttacagtgcccttgtgggaaaacctca
tattgataggatctcactcagtcatcacgacaagaaccgctaggtagatgacaaggaggt
aaagattcgaatccactgtcaaaccatttgatgtagacttaacggtttaactaagcatta
atttttttaaaaaaaaataagcacatgcatctcaagagtcacacatcttgccactggcca
ttgtcctctcacagcacaaagagcctgatcagattcagtcagccactgcctcgcttgttt
gtgccctcattaataagacattaacccctgagctaatttagcttgcctatgcaggcaatc
cgtgccgtgtagtacactcagtcacagagtgctacaccactggtcaactcgtgttgccat
cgacggcttcgtttgctttcaccctactttgatcgcctaattaatggccacacacatgtg
cactgtatcaggccaataaatttcttttttttttgaagttgtttcttgttatatctgacc
aggtgtgatcgatgtagacgaaacaattttttttcttacattttggtaaacagttagtcc
agttatgtatgtttagagccaatctatattgatttttatattaattgacaataccgcgag
gactaaagaccaagatctattttgtcccactgaattaagccatgtacggataagattgcc
tctcgcactgtgctcagcaaagacactaaacatgcgagaaaatttcgaacttgcaacaac
aaaattcctaaaatgtggttagcccttttttaaacaaaaatgtggttagccttttcttgt
tattttggaacgccatgctgtcttcccaaatttagaagcaaggagggacgaaatggcaaa
atgaaagcaactgcaattcttagtactggtttgaagccaacacacacacacacacagaga
gagagagagagagagtgctgtgaaggtgagaggatagggaagctggttgcgtctgaatct
cttacgttcaagaactgctcgttcattgtcaggtggggatctgatctttccgccagcatt
tctttctggatccgccgtcttaggagttgccgcccgacactcctgggccgtgttctgttt
ggtttctccgaggaatcatcttcttgctcatggaatcgacaaattgtgttcgagtttctc
cttcgaatctcgttttgtatgaaatttttagaacactctggcactatctgaagttgctgg
cgttgataattcatcaacctgttgttttgtttagaaccatcacaaaatttgcctgggtat
tgttttcctccctgtgatttgacttgggcttctaatcacaagtcggctgtgagctttcag
ttgttcagacgtttcttctctgaatctcatgatgtaaaacccgggctactgttgcataaa
ccaaaaggctactgttgttgaagggtccaaatcatatttcagctcatatttttttttatc
cagttccggctctgaattttttccttactattcatgatttgataggccttgcaacaaaat
gtcaaattatttatttgtcttgttcttattcaagttattatcctgtgcaggcttggaggt
tggaacaagcagtcctcctcactcttctgctcagtggtgaatgaccaaagacatcgacag
cctcaagccctcaagacgcc
>Pgl_GLEAN_10036901 PgMYB58
atgtgccaggcctgaataagcccagtccaggggttatagccggcggcccacggggcagga
gcagtggtgttctgttgaggttgaccaccaccacccccgcggccaccggatccgccgccg
ccgctggagccatagccccggcccttcttcttggtcttggtccggtgggtggtggagctc
ccggagccgctgccagagccggtggatgcgctagccgagccgctagagggggcggagccg
ccagagcccccggcggaggagcccgcctccctcgcagtgtacgcctgcgcagcatcagtc
gtggcgtcgtgggattcagaagcctcctcgaggagcaggtatgacatcgcactcctgaag
gtgtggggtggggatttagccttgatgacaggctttaggtggcggaatttagggttgaga
ccacggaggaggttgaggacttggcttggctgagaaacggggtggccgacgttgcgaagc
tggtcggcgaggcgcttgagtttggtgcagtagtcgctaatggagaggtcaccttgctga
atggagcgaaactccgcctccagaagcacagcgcgctcgagttcgttgtcgcgaaaatgg
ccctcgacatcggaccagaggttgaaggcggtgatgtggggtttgtggacgaggtcgaag
acattggtggcgattgtggtgtaaatccaattgacaagacaactatcgatctggcgccat
tcggcagatcgctgagcagtgggtgtgggggaacgaacatgagcctcaaggccaaatttg
ccgagcacggagtcaaaacagcatcgccactggctgtagttggcggtggtgtagtcgagg
acgacgggaatatgattgcggatattgattgtctgaatgacggatgtaggggctggttga
ggtggtgcagcatcatcatactcgtcgtcgctggaagcagaggagttggccatggaggag
gagtcagaggaaacagaggatagaccagaagcggaagcgaaggggttgaggaacgaggat
cgttcggtatctgataccatgtagaaagggaatgagagaaccagcagctatattgatcaa
gtgttgtacattatatacactagagatctaacaaactctgctattctacaggagactgag
tccaggcgacgtgcgggagcgcgcggaagtcgcggtcgcgtgcggagcagtggcgtcgtt
ggagcgtgtcgtgcgcggccagtgcgcgaggccattgcagccgttacagcgtgaaggact
tgttcaacagtatgctagtattctttctcagttatttctttcttgctcacgattcggcct
tttttttttttttttctaatcggtagatgatgctcgatnnnnnnnnnnnnnnnnnnnnnn
nnnnnnnnnnnnnnnnnnnnnnnnnnnnnnnnnnnnnnnnnnnnnnnnnnnnnnnnnnnn
nnnnnnnnnnnnnnnnnnnnnnnnnnnnnnnnnnnnnnnnnnnnnnnnnnnnnnnnnnnn
nnnnnnnnnnnnnnnnnnnnnnnnnnnnnnnnnnnnnnnnnnnnnnnnnnnnnnnnnnnn
nnnnnnnnnnnnnnnnnnnnnnnnnnnnnnnnnnnnnnnnnnnnnnnnnnnnnnnnnnnn
nnnnnnnnnnnnnnnnnnnnnncccccccacacacacacacactccacagttgtattctg
aattagaaaagcagtcatggtcactttagcatagcgaaattcaactgctcaaaacgtata
ggctaaaactttttctttttttgaaattatataggctaaaactttgaattttgttgaact
ggacagatattcttcttatcaaccctaaagggcctaaaacacatagtcatattttcaggc
tgcaacagtaatattataattccatgcttggcctgtggtgagatgaatctatcttaactc
tagatatgggacttgcatgaccacactgaatactaatatcggttgatttcttgaatgttt
gggccagcatcaaattcgca
>Pgl_GLEAN_10004603 PgMYB44
aaaaaaaggttttattgttagtggcacatatatggcatctttaatatagtgaaggaatcg
tatgcgtggatattcgttgagccgtctgtgtcaaactaaaccaaatgaaaagtgaatatt
cgcttaggcatcacatggcggtggtgggagatcaagcaattcgtcagagcctgtgcgcct
gtgcctgcataccccccagcattgctatctgaagcttagcgaattggtccctttcaggaa
taatggtccagctatagcttggtgtttttgaaacttagctttgtgttgggagggccttca
attgtcagcatgcatctctttaatttggtcctccaaatccaaaccgggttcccctggctt
tttgaattttaaaatccaggcactggatctcttaggatcacgctgtcagttttaatatag
gtcctaagttaatgcgtggtgttgtcatcttttggctagtgggagtgtgtgacatgggaa
tatactatatggctggaaaaccaatcaaaacgaaggatgctggctggctggctggctggc
tggatcttgtacatggttgacatggccggtaattaaaggtacagttacatgtcccgtttc
caacatgaaattacctatgctggctgacagcaaaacgatgacctgtgtgaataatgtgaa
attttgaaaacgtttggaaacgtctcatatcgcacgtaacccgtggttgaaaccccgtca
aacgaccgtttctttcgacgaaatgaagacaacgaccatactcatttaactttagcacta
ttacgtagcggtgggagaacacgcgacaagattgtcgtttagctttacaagcctatatgg
cggacgatccgctgaagtcgttgtaattacatcacccgtggaggaaaagaacacaacaaa
gatgacgtacagttaaatttactcagtgtatactatgtacgaggagttttattaaccagt
attacaccaccggtgtgagaacgcacgacaagattgttgtttagctttgtgagtctatgg
caagtgatttgataataaagtcgttgtcgtcacctgtgaaacaaaagaacatgacaaaaa
ccaccgttaaacttatcggtatatggtcggtaaatttccttagccaccggccactattat
accaccggtgtgaaagcaccctacaaaatatgtattctagtagtgctcatctcaatctag
tcgcctaacacttacgtcaagccaagctacacaaccagcatgacgataccgctagtacca
ttattgtgtgatgactgacattgtaaaacctcttcccctagaccccgtctcccctcatca
cccccagccccagggttgattaaccatcgcagaaaatcccggtgccaacaatcaaccccg
tccactccacccctccctgccctgcgggccccaccctatgcccagtccgtccccatccat
gatccatccccccattttcccctgaaaaactactccacagctcctccttttccttcggga
gagaaaagaagggaagggaagaggtgggccccacgctccccggcaagagtccaacgctgc
ggccaacccgcagccctgcagcgtgggaccggacccactgccagcgagccagctagccgc
acggcgaagacccaagagagctcggaaggaaacaaaacgcgaagcgtgcgcgggtacgcg
cagtcgcgtcgcgtctcgctaatttttatttttgcccccacgttttcccattctgcccct
gccatcctcggctcgctcgcttccccctcccttcctccctccaggcctgctcctgtcgcc
cctgctacaataaatacccccgccggggacagcccgtccccgtcatcctcctcctcagcc
gctccactctctccctctcctcctctcccccggagccggagcacccgagcgagggagact
tcctgctcactccagccggggccggccagcgctctcgattcgatcgcccgtgtgctccgc
cgccgtcgccgagccgatcg
>Pgl_GLEAN_10029006 PgMYB50
attctcctctctaccacaacgtgattacaatgacaataagaaaagatggatatgatatca
atgattttacatttctcctcaattttttatttttccaacctcttttgagcttatctttat
cacacaaccagatggcaagtcccaatggaaatcacgaggataaagacaacaaaggaaaca
tcgacattccatctacaacctcagcaattgaacgcaagatgctagagtatatggcaacac
aaactcagactctacaagcaatgactcaaatcatggttaatatctatcagtatattatag
agcaagcatcaaatcctaaggctcgggatttttctctccggattttgcgggatattcttg
ccaaaacttcagatggaccctcagccagagcctacgactcaacctaaggctcgggggcta
ctccatatggagtgcgattttgcaatcgcacttccatatcagctttggcttcaagacaac
gcgggctttgttgaagaccttcgagggcagcactcgaggacgcttgggactactcgagaa
gacttcaagattgctcaaacatcagctggagtacattccagcctcgggatgcttcgacta
ctcttgaggacttttgacttgtagtactcagggacgcttgaggactactcgttaaggccg
tcaagactacttgaagctatctttctcgactacaaagtactcgggggcttgtcgtatgga
cctccctgggcccactacctcggtgggtaccgggaccgactactcggtgggcctctggga
ctacccggcttgcactacacagcaactgaaggcgtggagcacaaggactgcagaggagaa
gtactcggttaggaagctgtacatgtcctgcactgtatggaagactcctagacgtactcg
actagtactctctccctactccgacttgtaaccctgcctcccggactatataaggcgagg
cagggaccgttctctaggaacacaacacatctcatccaatccacggcgcactattacacc
atcttgtaatcgtgcccaatcaatccagagctacgcagcatacaggacgtagggtattac
gcaccacgcggcccgaacgtgtctaaattgtgtgccacgtgtctcttccttcgagttacc
gatctcggcgaggccacattcatctacttcgggtactccccttagtaggttgccggtcta
aaacaccgacagacattcatgtgtgtagctagtacgtgcctagtccattagagtgtaaat
atctctagtataaattcttcactatttttaaaaaggagcaccaccccaaacttatcacta
catttttaagcttaattacttaacaagcaagcattataatgtacttgataatgtattttt
atgacctattacgctatgaggtaagaggacccaccttttaatcctaagttgtgcatggtg
acatgatgtgatttgattcatatatatagtatcttgtaaatcacaattcatgagaaaata
tataaatagttcatgatcatttatatggtagtacacactaagaaaaaacaattatgttag
agagtgggacaagagagatatctagagttgcatattgtgaagcactagagttatgaaact
tcccaaagatggagtcaacatatatatagtatccagcaaaaccgagcaccggtatcatgt
catcctgtgtgcttgagggtgcttgtttgccggcaacagtggtttaccacaagtgcaacc
atgcagctagtgtacattaaaaataaatatatttatttaaatcatgattcggcagacttg
atatcttttccttactataaatctatcactatttaactcaatatcaaatttggattttta
attaattgaagctacgatgaaaagattcgttgcgcgatctataagtaccacctttgctct
tgacattctttgtatccaggagccctcttcatagttcatagtaaccagtagcaattgttg
taggacacaacactcgcccc
>Pgl_GLEAN_10027845 PgMYB65
ttaagtgatcgatatataaatgttcatgtatgtattagctgtgttatttgttagttagtt
agttaatgtttgttgtcgaataaattaagaaaatatgtacataaatttgtagcattgtta
gtaatttttctgggttcgaagctaaggtatagctagaggtgtcgttttccacacttatgc
acttacctatatgatgagggtgatccaggtatatatttccctccacttttcctgacggtt
tctgatacaaacatactatatataggtgctgttcccagatttctcagcgtttatctagat
ttgttaaagaataatatttacatattgaactgcgtgcctatttgttgttgccagcttact
atattgctgctagctggtcaaaaaggggacgaagaatgcacacacttagtacaaactaaa
ggtggataacttgcttgtttctagtgccaaaggagaagcaataaaagttggtaccgatcc
taccgtatgtggggcatacatacaaagacaaaataactcaaagtcgattttttttattca
tgtttatgtacagttgagcacttgagctatgctaatgatgccctcgatcactaactattt
tcatctcttaattttgaaaaaaaagaagtgagagaaaccaacatgtctcttgattgtttt
cttttgcagcaccgtttatgtaataacctataccggtaccacaacattatcggtaatgct
gtgctccaaaaagtaattgcaaccctagccatgataatatattcatcaaattaagtaaat
ttctcgattttcctctcttatattggtatatatgcatgccttgtttacttgttgagggca
ataattggtggtagcgaaatgggagtttaaatttgaggggtgtacgtgtgtgtgtgtgtg
gttggtgcattcatgggggtcaggaatgagagttgtgtgatgaggaatatgggagtttag
gaggtcgattggttggctagctaaggataggagtggtagtaggatgggaattatgcttta
agcgaaagcttgatgcatcccaaccgttcatcttccgatcaatttctgacgcccgaaact
atataccaaaacaggggataagaattttctcttaattctcatatatggcaagccaaataa
ggcatgatgaagtataaagtccgactcgtatataaatttcttcttccaactcccacctct
agctaccgtgccctttcacatggcttgtcaaacgcatcaaaagatttggtgttgcacgca
aaaatactctttggtttgcacacctttgtatctacggtatgcggatatatactacctccg
tggttaaatatatgtcgtttaggacaagcaaattagtttaaatatatttaaagacagagg
gagtatattactactgttgttgttcatatcagatcaaacggtcctatatgctcggttttc
cttttcccaaatagactacgtagtaatgacacacttcaaaaaggacttcacctcacatct
tttgcgccaaaggagagggagagaggggaggacagaatatcacacacaccatgggctttg
taggagaagactcctagagggagaaagcgaagaaagagataggggatcggatgggggaga
gagagagagagaaaagagtaggaaactaaagccacgcccccagctaaagagagagaaagc
tagaaagaaggagccccctctcaacacaagctagctagcctgcaatcgaccagccgtccg
gtagtgtgagatcaaggccaggctgcaccggccggggcagccacgccaacaccatctacc
accacaaggccaagcccctggtcctcgttctccacgcccctgcgaaccctattccttgtt
cttgaatctctcatatccccaatcctacacacaccagctgctgagaggagagagaattaa
ttctggagatctagagagagagagaacgggagagaggagcgagaggtgcgcgcgcgtggg
aggccgggggagagaataga
>Pgl_GLEAN_10011452 PgMYB46
tgtttaattattactctcaattcccattgtttcttacacatttttagattatggaaaaat
gttccggcctcaacactcacaagtgagtgcctgtagccgttagggagcataaacgaaatg
aagtgcttagatcaccttatgcttccaaagcaaggattacaatactctgaaaatgacaga
caaaaacaagaaaagatcctaggccttgattcggttccagaatttcagtccgaaatactg
aagagtttcatgacggtgacatccgatgtgtgccatcactttttcagatttaacattttt
tttctcgaacgcacaggaaaactttgcatcaatatattaagaagaaaggggtaaagaacc
ccaaggtgttacagataacaaggcttgtaatccgccctttttacatcactgagaactaag
ggcccgtttggtacagcttcatgagcggcttcacgaacagcttcacaacttcaatagcca
aatggccagctctctgcccagctctctggtcagcttatctgaaaactcactctcacagag
ttaagcacacggtgaagctgtaaaaacatagctctcccccgctcatcaagttgcttatga
agttgttttctaaaaaacaactctattggtgaagctgagttgtgccaacagggcctaata
aacaacttgaccaggaacacattaccactcacttaagtggctgcaggagcttggcaagga
ggaaataggctcgtttagccccagcaaaagacaactgcagctaatcctcattaaagacgg
aaatgatggtggctaaactaggatttctccatcaaagacacagcggttccgatagttcca
cagggtcaagctccaagctcctaagaggctaagatgataatggagtttaaacccttcctt
tcctgacctgactttctcttgcttatattgtcccaccattcttcaaacttcaaaggacag
atccactgcttgtgcggcacttcagatttaacatatctccctctttagagagcagcaacc
aacacctgatccactatgtcccctgaagatgacctgcgacaaagaattagaatttgttct
cttgaatactatatatcgtgtctactcaaccaaatagcccaaacaagggaaatcttttaa
gccaagaaccaaaaagatctgctgtacaggatggtggaatgccaaaagagatgtacactg
tattccaacggaaatgtgcagatgacactacaaaatatagatgttggatagtctcttcgg
agtcacagaaacaacatatagtacacaaccccttttttaaaataccataaaacacttaaa
tctgaagaggaactttaaaattccaagctatacactttaatagtgtttcttccaacaaaa
ctgtttcttgaaacagttctattatttatggttaggaataacatttatagagactctatt
gcaggtggtttacatgaatctcctttatgggacgctgtcagccatcatcaggtatgatta
tgaaaatttatcaaatagatatcgaggtgtttcaccaatcactaaatcttggcactagtg
gactttgaaccttttaaaaacgtggatgagacaaggtattaacattcctcatgacagatg
gaatgtaggaaaagtggtcgaagaggaacgcgcaagagaaggacatctccatgggtatgc
acaagttaatttgccaagagaatccctttaattcaattgatgaaaaaaaaccttttcttc
tgtgcactgtttcttgaggaaatttatcgttcttcgtgatcagagaagaaatatgactag
tataactatttcaggtaagaaccatttagtgttgttttagtagcatgtttataacaaatt
gattttaatgttttctgtcgcaccctctttgaggtcagattcttttattagtctatcatc
tatcagggctgaaaaaatttccatgactatctttggttgtctgacaggaccctttgttct
ttggaggaatacctttaaga
>Pgl_GLEAN_10023444 PgMYB36
tcgcttggcttatcagccaccagccaacagtaattttctctcagaacaaaccatccacca
gcaaccagccagcagtacttttatctcagaacaaatcagcaccaaccatcaaccaccagc
caaacgaacaggctgataggctgggctgagatgagagatctggcgttaaataatcaagaa
tttccctatcttttttaccctttagtaggcttagtatttccagcaattgcaatggcttcc
ttatttctttatgtgcagaaaaataagattgtctagaaacgcgttataagaaattaatca
gtcagttggatattcgggagaagtaatttaatcgttcaaaattttttcttattttattag
tactcttttcttattttccgggaaatccagctacaggagaaccaagaacggggagctctc
ccctttttccgcacgactcgggattattaggacttgggtctctttcttgggcgggacacc
aaatccaaggaatatcctctggcattagagaatattaatcttgacaagaacaaaactaaa
gaaagacagaaaaaaagtttggcaaacttattaatgcaaaacgaccaattaaagaaaaga
gttgatactacaattcgactactcaatcaattggtagccgaccgctctaccaccgagcta
ctaaggaacaaggggagattcgacctcctagagttcaactcccgctctcaacccgtgaac
aatatgcgtgattggttgaaagaaagagaaatagaataatgagaatcatatggatttaca
caaacctctaatgattagaaactaaaaacgagatttcgaagtaattcggacgatttcaat
tatcatttatttgtacttattagttacttttactcaatagagcttagaagttatcaccat
tcaaaatttcttgccctactattggccaaaccacctgagcactgggtccaatgtgagtag
gatcggaattagccacttcaacgacctttgatggttataagggtatacttggagaaatag
aaggaacgtgtatcacacgcgccaaatttggaaagaaaaggtaacgagctaagcaagcaa
gcgcgacaagcaataaaattcccattagccattgctaggtcaaagatatatcttccatga
acagaaaaaggtcggggtggttttctggtcccacaggtacttgtggattcaaaagctcac
gaaaagcttcgccgtattattaagtattctcctttagttcgtttctctatctagaagtga
gccccaaagggagtactaaaggatcctatcttatttcttgtattatcaagaatttgaggt
ccttcaccttaattgttatttgaacaaaaagatcacaataaacttttggtaaaagttttg
tcttggtcggagtggggatagcatttctcttctgcatgtgtatggagttttgcaaaaccc
aaacacagatttgaaccgatgacttatgccttaccatggcattactctaccactgagtta
aaagggctttttttctcaataattagctactttcgtttactattatggtatgggtctcgg
caaaatagccccgtaacttggggagaaggggtgccccctcgcaaaaggggtcccagtgac
caggcccgggcgaccgtttaccaaaaagttggtgaactgatcacaggacgccgccccccc
ccccagatcagcagatacagaccgcttctgaccgactgacccgacctccttctcgtctct
gcctctcatggtcgtcttctccgcggcacctcgattcccgaacccccaatccccgaaacc
ctaaacaaaaattccccaatccgaacccaaacccagatctaccaaaaatccccaactcca
atcgactctcctccgtcgggatcacccctcccaatccaaccccaattctacccgatggga
ttagcagcggtggcttagcgaaccggcgcgttcgctagggttagggtttcgagggtttgc
gctagggtttggggttcgcg
>Pgl_GLEAN_10028237 PgMYB62
taccgcccttccggcgaccaccaccactagacgtccggccgggatccgtgacttcaaggt
aaatccccacccttgcttccctatttcttgtggtaatcgtttcgtggttgacaagagatc
atgaaagtgtttcttggttatatgctgcttgctccatttcccctgcaactacttgtactg
cttgaggtgaatgaattgaatggtgtgcagattagtagccgattccttacaaatgaatta
aaatgtaaatcaactgtggcagcagtgtttgttactgtcctggtttgccagctgtcagtg
ttgtggtcccttagttattcatgcagctagaatggaactcgggattactcttcagatttc
taaacatgctagctatgtttgagttatggacttaatcttgcgagaaaagatttccaagca
aagctaatgaactaggaaatattaaatttctgaactttgggttcatacacatctatctct
gcacacatattctgctggtcgctactcactgtttcttgcattactgtgaactaatatatt
tcctggatgcttgctggattttctattacctacattggtcatgcgctgattgtttttatt
aaacttcacagaagacacacgaccttgttcctgttacctaacatctaaggctaccttgtt
ttcttacagttcatatctcatagatgaactagaatatgagaccctctagttgtctgttga
cagatttttatcctcaaaatgtgcattttgagcgaataagaaactgccacttgtgctgcc
agtttctacttctagcaaccaaaatttgtcagactaaatagatatctgattatttcatca
tgtcaaaaaaaatcaaaccaaaaaccagctaagagctaacaaaaatgtacatcagttaga
gttctggttgcccgcaaaagttagatggctggttacccacaaatggagagggggagggag
agaattcaggaataatccttcctgaattctataaattcctaggggatgcacaggagctgt
tacatacagtgcatttacctgagggataaatgtactgcacgatacatggatgtcgtagca
tttcagaaacagtctgctcttatttgaatataatctgcagcttctatggattaccagttt
aaatttctggcttcagtgaaacaatggtacatcagcacaaggaggcaagggcaaaaaagg
aactttcacattaatgtcatacctttacatagtatccatatcagcacaaagatgactttg
acccccaaacgaaagttcatggactagaaggaccaagctaaaagttgagggacaaactta
actgttggggtaaagttgagggatcaaatcgcctattttgccttcctaaattaaaagttg
aagtgctttggtaatagcatattctgtgacatcacacctcttctaaattttatgagctat
ctgtggaaggaaggtgattatcgcatgagtaatgaccataaaaagacatgttaattttca
tggttcaacaatagccaaagccttcgaagcctgtattttatgctcctgttgatcgatgct
acttattcgttgccatctactgatccataatactgaacatcataaactataccacttagc
ttgcaaaatgcttaaacatatggttagtggtataaacaagcaacacttgacaatgtaata
cttccagactagattttgttgggagaatcttagtggatggtgcaatgcctaagatattga
ttgaggtttttgttctgagttgccacctagtaccttcatagggctcttgacagctaactt
tattgttatcgtaattatgatgaagttacagagttatcttctgtaatgcactgaatgctg
agaaatgtcaagccaagcctttaacttccttatgctattatgtaggtgcatgtgtcattt
taaagtgcatcatgatttgtgcatggatgttgtgatgattaaatttggtggtggtttaaa
tattaaaaaaattcgtatca
>Pgl_GLEAN_10017572 PgMYB63
tcaaaggctttagttcaaggactaccaaaaactgataactagcataaaggatgatgcaaa
gttcgtagtccatcctgagagcactgaagaatgatgaacatgtccacagtggatcccaca
tacaagtaaagaccgatgaattgaaactaatgtacatgctggcagatcttacccgtgagt
acggcagactcctgcatggctgtgggagcaccaataggcctatccttaaacaaactctgg
cgaagcgccatgttctcagcagcgcaacactggagggcatagcttaggcggcagcactcc
gcctccagatacttactcttcatctccagatcttttacatacagcttcttcttctctctc
gatttcatggcagaatccctattcctcattcgtctattgaaacacaacagaaaaggcact
gatattatatattgccaaaccaagaagcaaacaaatgtatcatgcatggttctctagtta
cccatctttcacaacaacttctcaatcgacatttacagtcacacacaaaaaagaagatac
acagataaccacttttttcccttcagattttgtttaaagagtataaatgtgtttattaga
tcaaggggcagccacataagcagaacatgagttcagaagaagctcatcaatacaaattta
cactatttaacccactattcaccccaccccatttgcctatctaaaccaggccacaatctc
caacccacaagtataatggaaggccagaggtgcatgtagcggctcacattctgaacaata
aagcctaagcagcctgaaacctctactaaaaaataaagaaaaccagagaaaaggacctga
agtatttgaattttttggcaaacttttacatacttcttcatctacccagcactgtacata
atcatactacagtcagttctggagacattacacctgcagttttcccatgaaaaaactaat
catgtaattattccgggtcattcaactttgtacatatatatatacagaactagatactta
tgacaatccaaagtttagcagctcctcctcccacactaatcgatgcccaattatccttcc
attcggcttatatcgcgcataatactagtagcaaatttgccatccccttgacaaactaag
gcatggcaacattaagacacgaaatttgcagataattggatcgatttatgtaccaaaaac
acggaaaagaagagggtcatacctcctcttcttcttgccgtcaggatcatcgccaccatc
ggcacccgccacctcatcctcccctgcggacgccccatccgcgctcctctctccagtgga
cttggggctcccgtcgtcatcgctgtccccgacgaagacgccgttcaagaactcatcaac
cccgtccacccctgcctcgttctcgtagtcctccataagaaacttctccacctcccctaa
cccctcccggaggccctccacaggaaccaatacctcccgcgacgcccccaccaccgcctc
cggtgccggcagcggggcgaatacggcggcggggtcgccggagaaggaggcgaggacggc
gtcgacctcctcgaggggaaggtcgtagtcccctcctcccccgacccccgccgcagccat
ggcggtgttcgcctcgctagtgccgagacgtggcaactgagtgctgggctcgtcggcgag
cacacatttcttctcctttcagaaaaaaaaacacgcacgcacgcattccttctgtctgtg
tgctatcgctttctcctttcaggaaggagacggtctagtcatccagtgggcctacggata
gtgatgatgtggttgggccaatggggaggccggaaagtgccacgtggattttcttttaca
atgtggtaaaccgcatcggctcgattactgttttactttgtgtgggctacggacatatct
attacagggggcccaaaacataagcccaacaacgcaggcatcagtgtcctttacccgatt
cgaccgccgcttccgctcca
>Pgl_GLEAN_10036530 PgMYB52
ccaccagccagcagtactttcctctcagaacaaaccagccaccagcaaccagccagcagt
acttttctctcagaacaaatcagcaccagccaccaaccaccagccaaacgaacaggttgg
ccctctcctccccatgcaacttgttagattaaaaaaaagaaagataaaaggaagctagat
ttcaatttaccaaaaaaagaaagatacaaaaaaaaatccagcttctcttactcttatccg
gctgatgtaattagatccgtcttttttaatcttcattcaaaaggtagatttcattacatc
tcggactgtagtgcacattcgtcaaggaaccaagaatcaagattccaatttgcctccgca
tgcatccgacccgggtacacggagtcatattcatcatcataagatgtctgtaattcctgc
caactttttcttccaagaaattaccaacactatatgaagaataatgttcggctatccttg
aataatgttgtattgagagaaaataagtcgatataagccgaacatgctctagattcagta
ggttgtgtgtttagtgcccgtacaagcacagagcctcagaattcaaagttggaacacacc
acaaaaggaaggttgtggagtggtaaatttctgtacattgcgatgagtttcactatctca
gagcctcggaacacaactacgactagcactagtttgatttcttcctatcgtttatctaga
atggataaaatatatgaagaatcaatagttgtagctccaattgaattcaatgatattcat
attcggttgaatgtctgttttaaaaaattacatgtgcattaaaaataagaaaatggtagg
aaaaccctagtgtattcagcccacctccttctcctctgtaatgggccaaacagttaaaat
tcggcccaaatgaaccagggcggcaccacccacccggccaccccctcgtcaaggcgctcc
tctgtttggacccccgcacggccgtttctcggccgctccccgactcgatgcgacgagcat
cgtcgtccccaacctgaaccctatcgtttgcggcggcgggtcgccggcgggatctgaggg
gcgcgcagggcgttcacagcagcaggagggacgtgctgcagccgactggcgcagagtctc
aagctcgcagccaggctgctaggcggccgggctcgggcggccagcgcggcaagccagcca
gaggctaggtgcggcgacaggaatcgcgcaagggcagggccgcagaggaaggcggcggaa
ggaaggcagcggccagcgtccagcgagccggcaagagcaactcggccaaactgataaggt
attctttcttggtaaattggcatccagtttcaacagattagtgattatagtttgaaaatt
tgtataaatttgtgagaattcgaccgagcaagtgaggccaacgagccatgcggaagtaag
ggggtgcgtttaagcttagacagtagtattgctaatttaggcatcctgggaaaattgcga
gtggggtatggctgtgatatggcttttgctgagtggtacatcataaaccaatcaggcact
gcctctaactttcctgttttttttgtctgttttgacatagtgctatatccattgttgtcg
tcgtgtgcttttgctgcggtttagttagttataggtaactgccgattgtcttccatctag
atctccgccgttacttgcacgtgatgttccactgtgcttgccttcactactgcttcagac
ttgtgtaattgcaagtgccatcaacgtgtatttgcattgggccatatgatttggaagttt
gtaatttattcaaatttcattgaattcctgaagttcttgtgaaatatccttatcctaact
ccacagcccccaaggatttttatttccttttcttgtccatttctatttttgccaccgttg
ctttcctaaacgtgcaatattcttttcagtgacattcaaatttaagataatctgctgcgt
accacaaacattcaccacag
>Pgl_GLEAN_10023203 PgMYB54
gaaacattagtctaatagtatgaggtgtgagtcttagatactaagttttttctatggaat
attgccttatgtttttatataaaatccttatttggaccctgcatctttgtcaaactattc
aaatagtggagatatcctttctattttcgtatgaatatcttcctataacaaccccaagtt
tctttctggaagggaaacttgggaaacattctggaatatattttgattgtttaaattgat
gaccatatggtgggtaaatcaaagtatactaacaaaggaatgagatgaatatggataaaa
tttccaatcaaagtggatgcttgaatctaacgtgaaattcaacataactaggcatgtaag
gatctcaattgaaggtaaacttgaagatgaatgacagccttttaaaaggccaatacttct
taagtactctttcttgacaaagctcaaccaaactataggtagctatgtggaagtatgtgg
aagtttgaacatggaaataattggttgtagtaggttttaaaccatttatgaacttgttca
tgatttacctttctaaaactaaagatccaagctaacctggtgaatatataagattacaag
tagaattacttaggttttactatattacattctcacaacaacctagccataattttgaac
ctatttctccaacaaagttgaagacatgcatatatcagacttataccaataaacctaagt
ttgcctaaaggggaggaggggggataagcaatcattaaaatcaaacacagttgcaacaca
taatagaaaacaaacctagttgggccaacttggtcagccaagtggtgctaggctcaacct
ctttggaccggtttaactaacctagtatagtagtttttatttcaaaaatcacctaaattt
agacaatagtagttttgattccaaacttattaccaccttttagttaattacctattatcc
ttatgaggtaagaggtaatcttatcatgcggatgaagtaatgagcccaatgtatattgat
ttggaagtaccttaaaaatcttaaatatgtatgccatgtatatcatataaaccatatcta
ttgaatgccatgcaaatccagaaaaaagatatgtaaatatgatagaaatagttcataata
tttatgtggtggaaaatactaagaaaatcaattatgttagagagacggattgaaagatat
atattatgtgatatttctggatatcaaagcattggcgttataaaaattcctaaagatgaa
gtcaactaacattagataaaccaagtaccgctctcacactatcttgtgtacttgacaata
ccagctagctgacattggtagtatggccatgcatggccacacttgtgcccatgcaactag
tgtgtgcatttacataccttgcaccttattagcacgttgaatgaccctaggcacaaaact
aggttacatacataagtaattgatgttattatttttccatagccagcttgttgatgtcca
tctcttggaagtatgcaacaattgatgcctgcaaatgatcaagaggcacaaccataaata
catatgatctagatatagaggctattggtttagttaagaaaatagaggatgcaagtggtg
tccaatacatgtgaataagggaagtctttctttcgtcaaacccgtgggtcattgtttaat
ggcgactttgaatctatgtgctaatgcatgcgttcaattggttgtttatatcttactcta
tcattttgagtccaatattataaagtatatattaagatatgattatataagacttgatat
ctttgaccttactattaatccatcactatttgattttatatctaagttgattttctaatt
aattaaaacaaacacaaaaatattctccacatactctataaatagccaccttcgggcttg
tcattcttcacattccaagagccctcttcacagttcatactagttgatagcaattgttgt
agtgcacaacactcaccccc
>Pgl_GLEAN_10013105 PgMYB40
cgggcgttgcagtaattggagaaggtcaggttcctccgcgaggatgacactactgctcaa
cagctgcaccacggacatggtcatgtaccccgccccaccgaaatgatctcatccgttcca
tatgtgtcaactcaactgcagagtatctaatcttctttccttcaaactattgacatttct
cataaaaatttatacaaaatatcccgcggcaacgcgatcaaaattcacctagttttgtag
atagccggcatctagttgtgcagggtcaattgctgaagtcatttgtttcagaaaaaaagt
gttaaaaccttatgtagtacaatttattatccaacgagcgcccttcccccaaatccaaaa
aaaagaaaaaagaaacgcatcggactgtcttcgtctacctcccgcatcgccgtccccgac
cgcatcgcatcttcttccttgtgcatccgaatctcgcgcatccatcgcctctcccccgtc
gacctcttcctccacccgccctgctgcggccccgtgggccgtgacctccggcgctctccc
cccccccctgccacaccgcctctgccgcggctcaccgcgccgcccacacataccaccgcc
gccactcatccctgccctcacctagccactccgattagcctcccccgataccgacccttc
ccattcggcctcctccaccactcgccgtctcgcccgcgacccgcgaccaccgccgggccg
gcaaccagccaggcttctctttatgtcctgcagctaccaaatcatccccaccctgacccc
gcagcccgaaccccgaacctaaccccagtcccaagccctatcggaaagtagccgcagcac
cacgtcgccggagaatcaccatcgccggaatcgaaggttcccattcttacttccgacatc
ccttttctccccttccatttttagcaacttccccttccgacggggatcgattcacgaatc
gagagggctctcgtgtgacgctagaacgattagttttcgaatcctttgaagctcttcgct
ctgaaacagagtcctggtttctggggaaagttttgcaatgtctctacaggaatcaagtgt
caatacccatgtccaccatttctcctcttcctttcagcgtcctgatttcacatattgatt
tgattgaaagtctaatacatggcttaaacatggttttgtcatactggactgcttggcagg
acctgtcacgttggcactagcgtccagtgtgcggtcttataatgactgttcatttatatg
cctaaaccacatttccagttttttttatgatgaatgagcaaaatacttgtttagatgacc
ttcagcttatgctttgatagtttatagtttgctacagcaggcgctcagcaaaaaacttga
gctacttggaacaaattcactttcatgcgcatttcggaaataataggatttcttgtacaa
tggtgacaccttcagagggaggggatattgctaatcaaaatcccactttacaaaaatagt
agttctgaagttgcctaagtttgcctatgctggtttgacttgtcaacatgcataccattc
tcgagtttagtaccattccaaccagcatgccgatgtgaattattataatggatgtgatag
ggtgtaattgatgtgaatgatgatggagcctatgaggcacattacggcaaacattttctt
cattaatttctaggtttgtacagattcacaagttacttcccagcttccctcctatttttc
agtatattcaaattggagtatttaatctgattttgcttcagccaagaatgggtggcgctg
cacatgtgaaaggaatcaacatttcttgcatatgttaattttttttgccaaaatattctt
gtaatggacaattttcagaatactcaatacttgccattttcagaatgccagcatttgcaa
tgttctaatggattgaattcatctcagaaggtgcatagtcgtgtttgcatcgtactggtc
tgaggagattaggactaaac
>Pgl_GLEAN_10001156 PgMYB38
agagacccgaatttgttcaaactcttgcattcctaagtacttaatgctattgtctttaga
tgaactatgtaatgatgttaccatttttgcttaacttgttgttggtgcaaatacatccaa
gttgttgaacttatcatgatgaattgatgatttcctgtaagcttttcgacctttctacct
atgagttttccatgcaccaacgtgaccagctccaattcatttaaatatgaaaacccaaaa
actaaacagggatcatgtagttctcttttatgttagtataacataactgtattgatttga
ccgatttgttatatgccatcataagtgagaacaaacatccttttaaacaactttttactc
cctcggtttcctattagaagtcgttttggacagcgacacggtcagcaaagcacaactttg
acttctctttttctataaaaatttttattggaaagttatatatgtatatttttatgaaag
taattttcaagacaaatctatttatatgattttcacaatttcaaactcaacaacttaaaa
atttttcatgatttatattcccaatatttgaatgaaatcttatataaaaacgacttttaa
tagtgaactggaaggagtatataaaattgtatttgtgtaacttctggtacgaaaatttat
cctgataaagtttccgtgtgtgtgttgtaatttttcaggtgacatgacttccccagaaag
ttacttactacctccctttgctaatatatgacgctagttagttcatttttaaactagcca
acgccatatattagaggatggagggagtatataaaataatgttgcagagcaaatatattg
aatgacttcctaactatgtttttctagaaaagttttctatagaagttactcatgtaactt
cgctagaaaaggatctttacatatcttttgctaaaaagcaaaatataaagagaaaaactt
gtttttttgaaaagtttattcaagaaaataattattagagttattcatacgaagcatgac
acaacacgtgaatagcatggagcacgtggtgcactgcgcccctatacgagatccacacac
aacactagtggagctacatgtaggccaaagaggaccatgacccctctttgctggttgtaa
aaaacattaactagctacatattgatgcttaggaatttaaattgagcatattaaacaact
aactaatgctaatggctttatctcgttttgtgttctagctccttctcagtgaaaatcaaa
tggattagatcacgtaaacgggtatcacacattgtgcctcagttaataccaacaagataa
tttttatataaaaataaactgtctcgttctgggcttcgggccatttttacaaaacaaatt
aacccctttcaacacaagatctttttaatatattttgtgtgtcgaatcaaattgtaaata
agtaccccatatacaaatcgctcttacgccctgtgtttcgaaacaatttattcaataagt
tattaatcgtaattcattgtgacaaatgttttgataaaaattttggcacggctgattaca
tggctgtcttatttagcttgttttagtagagttttgaaaagttcttgatctactttttga
tccaaaatttttatccaagatttgtcgttccaaacacatacttgtgttaaaaactaaact
gaagatgggagcagtagccatttcctgctagaccgtgatcttctgtctgtaaatctgcaa
gcaacgagacgcagcaatatgcaaactagaaaggaccccacccgtcagtgagacatattg
cactgctatgggtacccgatgccacgtccccacggcttcacaccgaacagcagaggtaga
ggagagcaaagagggaagaaggagaagaagagaggggagcactggttggggccgtcggca
ctccgcagacgcggcgcgttcccctccccatctccggctggtgtagccgggagtaaagga
aacgaagccgccgacgcggc
>Pgl_GLEAN_10037977 PgMYB61
actcatcatccctatgaatacacgcacgcaaaccctacccctacgagcatcttcgaagac
tgtgccggcaaatccccaagattgacgaagtcaccacaggagcctcgctgtcgacgggaa
cgtcgcctaccactgaaagcacaaacgtcgttaaatcctgagaaattcgctcccacgggg
agtcaaacccaggacctgaggtgttaccggggctcttgtaaccactaggctacaagccct
ttcgctagatgtgatgatttcttatgacgcatgtttgtatctaagaaaatggcgtataaa
gctactactagtttatttaatttgtatacagatacaggtaccgtatatttcttatcgggc
tcaattgatgatgcaatgacatttttttgctcatagttaatttgtgtgcaactaacctcg
cataataatgagtaaaattggatctagcccatattagggcacaaaccaagcaacaaaagt
gtccaccactcaaagccctcttgtcacacaaacgggttagacccctatagtcgtgaaatt
cccgtaattttcaagtgaggatatatagacgagaagaaaggaaattttccataaagttta
aaaatgtactcccttcgttccaaattgtaggttgttttggcttttctaggttctagatat
tattatgcatctagacatacagtatatttagatgcataataatataaatgaacctaaaaa
agttaaaacgacttacaattttacaatttggaaccgaatgagtattttatatttcgtcga
aatgctaggactcaaacgagatccaaacccctaggcattcaagaatattagtacatgaat
ttcgtacaatttattccttctcgttccaaagtgttgtaaaacagattgctatatatacac
tcaaaataaataattcatttagttttcatgtgccccaaaggagacctaataaataagcta
tcgttctgcgcatgcgttcgtgtaggtcgtcgtcggaccgacgaacatgctgcagaaaac
cagcagggaacgaaggcatgcagaggctagatgtgcatagtagtatagctgtagtaggca
cgtagtagacgcgtagatcgatcggtagatgtgcatttcgaacgaaataaatacagggcc
atgcatgtcatgaagcgagcaaagagcaaccccacgcattttcttgtcccttttagctag
gcagctgttcggacaagcctttcagagggacggggggcaggcagaggtcaaccactaacg
ctttgtttttctgtcacggattggcagctcagatccacacgacaaggggtcagtgtccca
aaccgaaaaaacaaaaggaaaacagagccagaaatgcttttggaatcgagccagattggc
agagactgggtcacatgatcgatcgaggcatcgagccagcgagctacactagctcgacca
gcttgcctagctcgctcgctcgctcgtgcgtgcagatgcagcctagctaagacaaaacct
aaaagatctcactgctgcaatgtaaagtgtgcctgcgccatttagctcatgaaactttgt
taaaagcaagctctttcctttagctactaagtttctctgtgattaatgatctactttagc
tagcctctgtggtttccctgactgcttctctctctctctctctctctctctctctctctc
tctctctctgcgtgtatataaacgtgtgacccttgcttcggtggaaggagtccactgatg
cacacatcatttcctgctacaccgttcaaaaccagtcaatgtagatagacagggtctgtg
tccaactcccccttattttattcccacatcactagcttgcttatgcttttacccctctac
cttcttcatatcattgctgcccttctcgctatttcttccttccttccttccttcctttcc
tttgctctcccacctgcgcatactattctcgcgatcgatcggatccagccatggtgggat
agagagagatccatggtaag
>Pgl_GLEAN_10032286 PgMYB45
gccatggcttttcagtctcttatttaatcaccttggatcagaagcatatgtagaaatata
tatgtgttgtatagccgccacgcacaatcgagctagcactatattttgcatgcatacata
tatcttggagcaccacaccctagctaggcctcagtagtcgtcgcgagctactagagctag
ctactacatcatctcgtatcttggtgtggatccccggccctgcggtaaggctagcttcct
tcgatcaatattgcatgtgaaaagaacgatgtgcggatacatagtacatacatggtggat
cgatacatacatacagagagggtgtgttgttttgcatgcatatgttttttttctttttgg
ttaagttatattagttggccaaaagaagatatcggcaggggcggagctagcagtgggtct
agctacaggggctggagctcctcctaccatcaatagctagctcaatgcatgcatgagatc
gagtcctcctaagcccctcctgcaaattcgagaggaagaagagagaaaggagagtgctgg
agccggaggaagaagaagcaacctctcgtagacctcgttcctagcttcctcaccggatat
ccatgatttttcgtttagttttcatcaaccctttttgcaaatttgggatgctttggataa
agatgtgttaactaaccagcatgtcatgcctcctaacatgcagaaaaaatgctctttttc
tcttaatcttaattaggttgaatagtaatggaccaagcaacgatgtggccttctgggcta
agagtcctcgttattgataacaactcttcatacctgtcagttatggaagaactacttatc
aagtgcagctacaagggtaatacatctatcatatgtctactattaacaagtagatatcgt
gattattgaaaattattaaagttgttgtgcatttataatattgtgctggctaatgctagc
tactccctccgcccctatttatctgtctccaggaaactggatcatatcagtaaccaatgt
agccctagcaatcctatgaagcaatcatttaccagcgaacacatcatcaacctttttaca
ctaaacaaatcaatgtgtgttacgagagaccgctaggggggagaaacaagtagctacgga
cgctagacggagtagggagcgacacttattacgggacacgctactgcaacttcagcgaca
aaaatttagggacagagggagtagatcttaatgcacaatgcaaggcctccacataaaacc
ctagtgtgaacgtttactctggtcaacatcagtatatctattatatggatcctcttaaat
tattcatacatgaacattacatatatacacccgtatttgtttcaacaaaatgcatgaaat
atggtaaaaggagagaggggcctttttaataatagaatttcaagtataatatcaaactaa
aagatacaaataaaatattataatgcctaataagcatattgtccatctagagaggtcgag
accacagctttccctgtttttttctgaattagacttgtgatttaaggttcagtcgtaaaa
agatatgtcataaaagaaattgacaatataaaatgtttgttttagtaccatcatcctaat
agcaatcgttgcttcagttaggattcatgaactttgatttgcatttgaatgtgtataaga
taataacaatctccaactattctggagaataattgaacatgcatatagtgactttcaatt
cattctactagctagaaaagcattgttggtgttctaaattgaaaagaaaatgtgttatac
caagtttctaaaatactaacatgtattgaaataaagatacttcagtaaggatgtaaaaaa
attaaataaatgttcagatttcagaataaactgctttagtccaatataatgtatagctag
cgatacatattcatattatgctgacgtactttaatcatcaatcacatccagttacaacat
ataagaatgttagagaagct
>Pgl_GLEAN_10010867 PgMYB47
aggcgtgctgtacgtcccaacgatcgaggttaatctccatgcatgcatacacacgtacgc
ttattaattaattaccaacaagagattaattaggaacgaatgacccagcaatctgaccgc
agccgctggtcgtcgcgacagcacctgagagtctctccgagcacgcgcacgctataacta
ctgttacacaccaacctagctagatcgtagtacgtacgtacgacaactggaattaaatta
gcacgttggccacatgctaactactgtgttacacacctgatatatatatactctcgcaga
ctaaagttggatttcgttaagcacacacgactactaaatctgtggttaataaggttttaa
aaatattattacgtagagcgcacatggtagagtatatagtacttctacaatggaaaaaag
atgaaagactataataccctcatcttatgaaaatatcttaggacaagaacggaaatgtca
ccccacgcgtcttgtcactatataaagaatattccttcacagctcggtcactcctctcat
tctctcccctcgtctccctcttgcggatttccccctcttgcctcctctggcctcctttct
cttcacagtagcaatctgctgcctcccctcctcccgcctaggatacagttcctagcttgc
tgcatgccctcctctcccaggccgccggccggcaaggtgagcatgaaattcatatatcca
tcctccagtcaagcccctaaatccttgattacttgctgttgaagctcatacttgtaaact
ggttcacccaaattagttcatcaatcgcccagtcaagtcatgcatatcatcaatcggcca
tctttcgcattatgtatttggaggatggccctgctactagtgcatattatgttttaggat
ctattgtaattaaccaactaataaattaagtagttgattttgagttttggacacatctgg
taggagcagtagtatgtagctagagcattttgctgcatgccctcctctctcgggccggcc
ggcgaggtgatccttgattacttgcatatatccatccctccagtcaaggttctaaatcct
tgattacttgcattgttaaagctgatacttgtaaaagactggattggttcctgcacatca
atcggctagtgaagtgatggatcaatcggccatcttttcattatgtattttgaggatggc
cctgcgtgctagtgcatttttttaggatcaattgtaattaaccaactaataaagtagttg
attttgagctttggacacgtctctggtaggagtagtatgtagctagagcatttagtccta
tggcatgattatgcatatctgctgctccagaggattcaaccacattcaacaagcaggttt
tgtttcctgactctcatgagatgcaaaagggatcggaactgcttgtattattttcgtagc
tcagactcataagtagtattaggatatgaaccaaatgggtgttcaaagctagtaagctag
ctagcagtgtggtagttgatctatatatatagttctacatatggtaatacaattatgctt
tgctgtttctttcttgggatgaagtctgaacctttgcatgtgggtggtcaggaacccatc
tgtcgcaacctagaaaatatgcatctcagtaatctcacccatcaaccgatagcatgtaca
gtacaaatgcacggcagcgctgcaggtacctatgtacatttttgtactttgagaggacgt
ggtactgtgcagctagaaatgatgtgaaccccccagcatgatgggaagtcatatagaatc
aaacttggtgttacagtttattaacttgatcaatagacatttacaaattaagcagattaa
tttctaccttgcctaatataacttgatcagataaacacttttgcattaatactgtttaat
tatatttaccatagtaaaatgcttattcaagttttggctcaccttttaattgttgtgtgt
ggtagatggaacttgaagcc
>Pgl_GLEAN_10029495 PgMYB51
tttccaacgtggcctgcattcagccagctgactgggccttataatagttgctcttaccct
ctcgagaaacaagctcaccggtgacatcccagaggctgttctctgcaactgctcctcctt
aacctacatcgacctgagtgacaactacctcaccggagatatccctacacgatgttggcc
acagtacctgtggtggctcgacctctcggagaacaagctcgtcggcatcatcccctcatc
aatatcaaatcttacgagacttgaaagattgggtttgcatagtaattttctcggtggtgt
cctgccatctcaaatattcaacaagatggcatctctctcggtcctcgacctgtccagcaa
caatttctcaagcgatggcgggaacactgagctggagcctttttcttcggttctctagtg
aactgcaccagattgttcgggatttatgtgaactcaaacttaacggtgttggaggaaaga
tcccggagatcattggcaattttacagcacgatcctcttctcgatctcttcatggatgaa
aacataattactggcacaattctcacaccattcaaaaccttccctggctatgcgaggtat
ctctatccaacaacatgttggagggcccaatcccctcggagatatttcagctacaattcc
ttcgtactctaaacttgtcaaataacaagatcaatggtgaaatacccaaatccattggtg
aggctaaacagttgattttcatcgacctatcatccgatgatattcgaggtgcgataccgg
agaccatatccaacctcactttgttgcaaaggctcgttcttagcaacaactggatcagcg
gtgaaataccaaaatccatcggcctactatctcaaagtttaaattctattgaattatcgt
acaattgtctccaaggcgtgataccggagtccttgtccaacctcacttttctttatcagc
ttactctgaacgataaccagctcgcgggcaccatatacctcagcacctgatgatggcctt
agctgaagcatgatggataccgcaatacaggccaagtgcatgttgtgtttttgaagtctt
gctaatgaatcgagtctaaacctgatgcagtcggttttggttattattaggcgcctagca
tgagaacttctgttttgcagtaatgttcagttgatggggtcttctttttctgagagaatt
tcttctttttttgagagcagggacgaggaggaggagggacaatgaggcccagatccagcc
cacttgtgtcaattgccaaacccattttgttctcaacaagggcttgcgatcgccaaaatc
gtggcattgccagaaaggcctccggtccggcctagcccacagaactctgccttcgagatt
ctcccgaacttcccgtggcgaacggcgcaccgccggcggatggccgagctctcaccggct
caccgctccccttccctccgccttcgccgccctgctctgccgccaatcgcttctgccccg
ccggacctctcctgaaaccttgcgaagctgccgcgccggcgcgtaggcccggcaactgaa
ccctcgctttgccctcgttcccctccatcccatctcgaatccgcgcacaagcgccccccg
accgaccggcgagaagatgccgcggctgacgccggcggacgcgaccctgatcctggacca
cgtcctgggcgacccctcggtccccnnnnnnnnnnnnnnnnnnnnnnnnnnnnnnnnnnn
nnnnnnnnnnnnnnnnnnnnnnnnnnnnnnnnnnnnnnnnnnnnnnnnnnnnnnnnnnnn
nnnnnnnnnnnnnnnnnnnnnnnnnnnnnnnnnnnnnnnnnnnnnnnnnnnnnnnnnnnn
nnnnnnnnnnnnnnnnnnnnnnnnnnnnnnnnnnnnnnnnnnnnnnnnnnnnnnnnnnnn
nnnnnnnnnnnnnnnnnnnnnnnnnnnnnnnnnnnnnnnnnnnnnnnnnnnnnnnnnnnn
nnnnnnnnnnnnnnnnnnnn
>Pgl_GLEAN_10005446 PgMYB56
agaaaaaggggcttgttgataggtgaaactcgtatgaagtttcgatccgcaagtgtactg
atcacctatgcccttcttcacctatgggagatcccaaggttcttttcaacctaaggagca
agaggatttctagcatttaacctaacactaatctagttgattgaagacttatgatagaaa
gattaatctataaagtaaagacaaactaaccctagattatgttaaagagagatgagaggt
gcacaagtatgaagaacgtatgcccgtggagtctaggtacttgaagatgcaatcacccaa
aacatgataaacccccgatccaatctatctaagcatgtggtcaagtattagacccttccc
tcgtacatgtcactatgtgaaggtaatcgtactaaccctcatgaacatggtatgttgacg
cgatctacgagaccaacgcaaaatcatggtagctagacttaaacattaagcatcatcaac
aaaaggtatgatagacatatgatccaaacaatatagctgactacaattcaagttttgtta
caactccatggacaaacgatagactttaccccataatgacgctaggcatggcaccgttga
gcatggtggatgcctccaatgaagatggatcatcgttgtcctccaactccagtggcaccg
tggcaaggcctctgtgtccttcatcgtggaggcctcccttaggcttggcgatgctctctc
tcgagtgtcctcccccaagagtctctctcgtagtcgatcttctcttccttggtggctctg
aggaactagatggtgtctctggcgaatggcgacttccccaagtgattagggttccacgta
cttaacaccgaagaaagggggccgcgaaccaccaccaaaagggggtgggctggtcggcat
ggacgaccggcctgggatctcttgggctcagtttcggcccattttgcttcgcgctccatc
ttttgcattttggatcgtttgccccttatttgtggactttggacatcattatcgccgcga
ccaagttgagggatctttatgcatgaacttccggtcttttcatctcggtcctcggaaatt
gaagcacattggtccttgccacctttggaggcaattttgcacacagtcagagctccttga
ttgacttgcaaaacgtcctccgaactagttgcatcttctctcatttaatacaaaaacact
atactccaaaatgcacatctaacggtgaacttcaaaccataacataacaagtgttcttgg
ttgacggaaatcgaccaccaacacatagtattcataaaaaataactacttgttacaaaat
gttgacttactatgacattgaatatacatgtatatcaaataaaataattgtgttaaaatc
ttgagaaaagatatgcatatattcaagatttgaattgttcaaatcatttatattgtagca
gctcacaaaaaataattggttagagatataaacatatcttatgggatcatctaaacatat
cttatgggattgtcgccatctataacatcaacattgcaatggagtccactgatagtagcc
aaactaggtagtagtattcaaccatcttgtttgcctaatacgaacagtggcacacagtat
gaccatggtattctacacgtgtcactcatgtcaatatctacatccatgggtgcatgtgca
ccttcctataacaccttatttgaattattgaataaattaggtgtgatatcctgaaattat
tcctaaagtataaaaaattgtaattaatttgcgttggcatttgatatattctcatgagta
tatatcttagatttttttcattagaatttcattgtattcttggatattcaataattgtta
tggaattaatcataattagcatggatagatttagattcgctagagggcctataaatacat
ggccttgtgcatgccattctcaaaatcccagtaatcaccatcaagttcacactacaattg
ttgtgtagtacctagcctcc
>Pgl_GLEAN_10033508 PgMYB83
tcccctctggtgaccctaaaaaaagaaaatcatgaatttgttatgctcattacattcgtc
acgcaaagttgcactgtaaagaggtttttcaaatacacatcatttcgtactccatgcata
tccttgggtgaaatttttttcaccctcctaccaaacacgaccgaaccatctcgttcactg
tggcaacaacacgtcctggttcaacttagcaccaaaagcttgcagaagcaattataataa
tcaaccaaggcttgaataacacaagccccttggtaaagaaaagggaacaaaataacacta
attgagtgacttgttagcccatgtggcaaaaaagttcaaatgcatacccatagcctgcct
gcggccacacatagccaaagttaccgtccaaaaccgattgggttgttatttattaagtgg
tatggtgtaaagtttaattagggtaaaaaatactaggtttcataattcatggtcaatttg
gaggccatgcaagttcagggagtgatttggatttttccctattgaatagtagccaatgga
atcacacgcgtcagcaatagtgattcagccatagccaagtgtctgaggtgtgtccaacaa
atgaacgggcaaagtgcgcgtaaaaaacttgcaactttcaacatcaaatcggcataccaa
tccatctgatcaacatcatagggcaatataccaagcaatcacatattgatatatataaat
ttgctgctactctgaccatgtagcttctgcagacctgagtcaactgccctttcattcgca
agccgtagattcagatcttttttgctgaactggtcatagttaaattattctacatgatgt
agcacaagaataatgcgtatgaagatggtggtttgacttgtgcatgcctgtgctgacaac
ctaaacctgtacattaattgaaatctaatatactctagccaggtaaaattacgtgtgcgg
tgtgcctatatgttcaaagttagcaagcttcagcaagcattgaaactctgattcttgatg
tgagtagcaccaactatttttgttatatagttttgttattgttactgtattatgctcaac
acaagtagcaccaagagccatgtgtcactgtatgtcactaagttccccccataagttagg
tatgcatttgcttataagaactccccaggactcaggagggtggctccagctgcttggaag
cataatgccgattcacattttctacattaagaagatttaaaatttcaacttgttggcatt
atttcgtatatgttttccagataaaataagagaaatgttgtatgcaaacattcttgttgc
atgttacctgctattattttactaaaatattttctttgtatatcagttttttcttctatt
atttcatttagttttgtagaatttgtaaatgcaaaataaacttcatagtgagagaaactg
agagaggctataacagttatcaaattcttccagcctgcatgaattgggcattcagtcagc
atgataaaacctggagaccaacaactgttttcaatagagagaagcaagcgtcaactcttt
tgcatgctttcccacagccagttggcactggaccccactcccggcccacatccaattaat
tatataacccccagcataggcactaccccctctacgcaagcccaaaataacacactacaa
tagcatagtccccaattcccccaccctaaagaaaaatgaatgtatggaatatcactgttg
aaaactagtcaatgtagtgaaacgcttgtccatttccccgtccatatattttattcgtgc
tgcatcaagtttgcttatgctacttcccctccctagctagtagtattattcccatcacat
ccccctctcttccttcccacttcctactcccaccaccacacacctcattccaatcccatc
atggaggtggtggtatagagagacacaaatataggaggtagcagcagcaacctcgccctg
agaggtggaagaaggccggc
>Pgl_GLEAN_10031849 PgMYB103
cttctttctttctctctaggaaaaatcaaatgctttattatgatactgtgcatgagatgg
tgttttagctccacatggtttgtctcaatccaggtaaacattttttaatatgttactaca
ttatctttgtaatatgttactagaatgtcttcatgttttttttcaaataccctatagtgc
cattttgtacagacttgacctttgtaacatttttgttgtaggttttcagcatgatttatc
gtgttcatagctttgagttactaaaggcatgtattgaagacatactctctacaataaaac
caggggaagatgatcgaaagaaatgattgcgtgcaattgaggagctggaagattccattt
actccgttggggccttgtaattaagcatatgttaagttttgtttgtgattctcctaggtg
gtagctttatgaagacatgagaggtgacatgcttatagaattcatgatcttagaaaaaag
gataagtttggtttattaccattcaatggtgatggttgtcagtgtaattgctgtagatgg
gaggaggaagacccttctttcagttaatttaacgagcaaaataatgccaccatgcattaa
aatgttctgcccattgcatcatgctgacaatgtgagttcactcttacttttggttgtttg
ctgtgctgtttcagttgtgtatggtaaagttgtcaaccatagttagcttgtatgccaaaa
gatttcaagagttgtaagtgttgtatgtgcgctaagtatccggtaaaatggtagtcattt
ctattcatgaggtgtggatggatttgtgcattgtttgactgaaacctcaaattagtctga
aatgcgaatttgataatggtcaatggactgtccttgtcgggaagcagatcttgggacgag
gttctaacatggtgatctttcttcggccacacaagaaggaatgacatattctgtacctgt
ttgtatagtgagctctaaggaaagactgcaggagcaatcaagcaggccgcaacaagagga
gtgccaccggtgatatatggcatttccatggaaagttcttacgaaaataatgccacctaa
gattagcatctttggtagagggctttgcataatttctcagatctgttatggtgaaaaata
catcttttttcttattccaacaaatagaatgtgattattctgtaagggtgtgttttggtg
aaaaaatacatcttttttcttattccaacaaatagaatgttattattttgtaagggtgtg
cctgaacatacttggcatctgcctcctgcattagtccatatttcacaaattggaatgtgt
ctcaagttacatataactgtatgtatgcagctttgtttacttcaataactacaatcttga
ttttttaaggttcaaccttatttcatattaatattctcattcaatacttagtgtatttta
gtattaatattttgttgcccgtgaaaatcaattcacgattagttggccgatgcagccagc
gacggagaccagttaaccggcgccaatcatccgagtcgagccgtcgctgtccagctcaaa
aaaggagcagggacacggccggcaccagcggccagcagcccaacacgcttgccatccctc
tcctctcctctcctctccccctctcgcgcacacaagaaaaactggggacgcagcagccag
ccgcacgggacggtgaaaccgaaaatatccccccccgcgcggtaacgcacgtctccccgg
ccggggccccggtagatctccgcctccgacccttccatccttccccctcctcctccattc
tcgaggccccagattattcatccccccttccccgcaatcccgcccgccgctgtgccctgc
ccaaacccaactccgcactctctcctctctgtctcgccgcgccgccgcttccccgtttcc
cctcccatcctcaccaccaccaccccccgccgaaacccttcgaaaccctacccgtgggat
cccgcccgcctcccgcagcc
>Pgl_GLEAN_10029306 PgMYB77
aaaaagcgaaaccacgacgatagctgtgtcaaaatagcaaatttctctcgtaaggatcga
gacgcagatagtctctaaaggatagacacttgggtggttcacatgtgcatcactaagcaa
tatattattaacagttgagtgcatttcaggatttttctgaactctgaacatttagttcac
atgtgcgttactattttactaatcatctaataatatagttaatggactgcaattgaaaga
ggtggcaatgagggttcttccgcagcggctgtttgcacgtgcaggtatgtcacaaccgtg
caaggaggtaaagctgcagtcggcgatgcaaagccacgcctgccaggatgggagaggaag
ctgatgcgctatccgccagcgtgaggagaaccctcttgttccggtggaacctcgatggcg
tggcgttgcgacaggttcgggtggttgggggagctgagggtgctggcgtgctgcggggca
ttttgggcgcgaacctaggagagggtgaggggaaaggtgaagacaatcgcggcggcgtcg
cagacgggtggggaaggggaacgagccgccgccctggtaggccgttgtggccaccgtcac
tccctcagccgagctcgtcgacgctgcggccattccggtgggtcnnnnnnnnnnnnnnnn
nnnnnnnnnnnnnnnnnnnnnnnnnnnnnnnnnnnnnnnnnnnnnnnnnnnnnnnnnnnn
nnngggtcgccgtggaagcctccgctccctccgcggagctcatcgaggtcgctggtcgcc
gctcctcggagctcgccgtaaccgccgaacccgtgaagctcgccgtcacctctgctctgc
ggagttcgtcggggatttcgctcgggggaggggggtcgtacgattgctgtgagggtgctc
gcgcctgtcgcgggggagctcatggatgccgcggaggagctcgccgtccatggggagcgc
gtcgttgtcaccaattggaatttggaaggagttggccggtaccgaggagtggaggaacca
cgcgaaagagaaagaataaaaataaacgacggaaggagagaggacgcgcacggatagggg
agcgcacatcgggcccagcggctacggtaggcttcagtgtgagaattattatgttctggg
tagaaacactcttcaaaatgcgattttctgtacttcatagttcttcctccttacccactc
ctaaaaacatgcgacgggtgggtccgacgtgaggggtaaagtgggtccgatttaagtgag
aaaagttatcgattatgtccgcttttgtaatataaaaaaaatctcgagtgacgaatatga
cactgagcttgacgaacagttttttttaagaagaacttgatgaacagttgggatagctct
cgcggagaacgggccctcaaaaaaaaatcgctttacacgaaagaccctcgcctcgccttc
gatcagctcagcccggcgtcatatccaatcagccagctcatgggcatggcccgatacgca
aagcctgtggcttggcctccctctctttcttctccgccctcctccccacacgccacaccc
cctctactccgtcgtctcgtcgcaggcagcaggtgaaaatctccggcattaataagcacc
cccgggaatcctcctcggccgcaaacaaaaccttcctcgtcatccgcgccaccacccctc
gcttccctctgtctcgcccaaatcttcttttaccaacacccctcccggtctcctctactt
tcacatcacactcacagagcgcctgtgtctgggtgggcgccgtctcttgtgcttggcgtc
gacgcgttagtttctgcgcgcgcgcgcgcgtggcgtgggcgaggggacaccgaggggcct
cggcgcgcacggnnnnnnnnnnnnnnnnnnnnnnnnnnnnnnnnnnnnnnnnnnnnnnnn
nnnnnnnnnnnnnnnnnnnnnnnnnnnnnnnnnnnnnnnnnnnnnnnnnnnnnnnnnnnn
nnnnnnnnnnnnnncggccg
>Pgl_GLEAN_10004210 PgMYB100
gccctcttggaccatgggctcggcatctggcctaggaatgtctggtatcccaccatctac
tcaagccggtggcatcgagagcttagcaaactacaacaagcacaatttcggcttcaaatg
agccttgatcaatacagaagacctctcgactatccttgatctcccctgctggcctgcctc
tcatatatgcctattgattaaatttccttttgttcgttctttggctatttcgccacacta
cattttgtgccatccaatcttgccctgttttgtcacttgtgtatggtatttatcaggttt
gtgggcatgatgtttattgcgtttgtgggtaaagcatacaactccccaatctcaccctgt
caattgggatgatacgcctcctgttgctacgcagcatgtgtaaatcctgtgggcttccct
ctgtggtcggtctgtctgtgtaactgcagtcccatattgcaaagttgcaatcttgagatt
ttgtttcgataataaagagaatctgtgaccttggtgatgttgactcgtgaccacctgcag
atgtgtgatctgaattcgattgagcctgttcaggcgaagatgatctgaatgtggtactgt
aaatggagcaatcaggcgaagacgatgtccgttctgatgcatggtctgctgcggtgggtg
tccgcatcactgtactgaatcaggagagtgacgctgtagcaacgccaaaacaggcggttc
gtcgaatctttcctcgcgtccttgcagtttatgccacaaattgatcgaaaacaatgtcgc
gtcgtgcgaaaagagccaaattaagggctacacgaagatgctcgaatctaccatttttag
cgttctttaagcaccggttctcggctaaccccccatctgcgacgacgacgttggatgcgt
ggactcggacgcttggaggttgggatccaacaagacgagggccgagccgaggggggcggc
ggtcagcggctcacacggcggctcgcggccacagctggcgcgaatattccaaccgatatc
agcgcccgccagccaaacatctccgcnnnnnnnnnnnnnnnnnnnnnnnnnnnnnnnnnn
nnnnnnnnnnnnnnnnnnnnnnnnnnnnnnnnnnnnnnnnnnnnnnnnnnnnnnnnnnnn
nnnnnnnnnntccccgcgctgccgcgtgcgccccctcggccgccggaatattccgcgccg
cctgcgctgcgtgctcgcacggccacagctggattggatggagagtcaccgcacgagcta
gcagatgttaccgacccgggttgcgttcccacgcagagagagagagagagagagagagag
agagagattcgaaaccgaagtgatcttgctgcatttccctctccctgtttgtccttgttg
tactcgccttggttggatcgttctgtccctgaacgaatctgaatgcaaactactcgcgct
ttgttacactgcagaatgagtgtctccatgttctcacggtggagctactgacaagacagc
attcgaaacggcaggatcacacggttttgtgctaaattttgctcagaatctttttcttgg
ctgaatctgaaggagcggcagccaagtggctccccctggttggatggacgcggggcgctg
cggagatgcccccgttcgtttcgttttgtttggtcccttgcaacgatgcgttgcaccacc
ccaagcgctagctgctcaagtcgtcctagattcctcacacacatgcatgatgccctcctc
ctccttctccgccacaccctgcgctccctccctccctcgctcttgtcctcacatacacct
gtgctgtgctcgcgcccgcgttacaccggcctaggctagggactagcaggacgtggcaac
gttatattgcctttgagcgagaaagagctcggctgctagctcgagctgggtgtccgtgtc
ttggccggagacggagaggggagcggcgatcgccggggaggaaggaaggaatgatggagg
ggggctatggcggtggggcg
>Pgl_GLEAN_10031638 PgMYB71
ctggtgctggtttgttctgagagaagagtactgctgactggttctggctggttgctggtg
gctggtttgttctgagagaaaagtactgttggctggtggctgataagccaagcgaacagg
gcgtgagagtctctccgagcacgcgcacgctataactactgtacattacacaccaaccta
gctagatcgtacgtacgtacgacaactggaattaaattagcacgttggccacatgctaac
tactgtgttacacacctgatatatactctcgcagactaaagttggatttcgttagaacaa
atcaagtcaagcttagcacacgtacacgactactaaatctgtggttaataaggttttaaa
aatattattacgtagagcgcacaccgtagagtttatatatagtacttctacaatggaaaa
aggatgaaagactataataccctcatcttatgaaaatatcttagaacaagaacggaaatg
tcaccccacgcgtcttgtcactatataaagaatattccttcaccacttggtcactcctct
cattctctccctcttgcctcctcatccagaggagggagctagctccactggcacaacgac
agcctcctttctcttcacaatatcaatctgctgcctcccctcctcccgcctaggatacag
ttcctagcttgctgcacgccctcctctcccaggccgccggccggcaaggtgagcatgaaa
ttcatatatccatcctccaatcaaggccctaaatccttgattacttgcactgttgaagct
catacttgtaaactagttcacccaaattagttcgtccaatcggccagtgaagtcatgcat
atcatcaatcggccatctttctcattatgtatttggaggatggccatgctagtgcatatt
attttttaggatctattgtagttaaccaactaataaattaagtagttgatttttgagttt
tggacacatctggtaggagcagtagtatgtagctagagcattttgctgcatgccctcctc
tctcaggccggccggcgaggtgttccttgattacttgcatgcatatatccatccctccag
tcaaggttctaaatccttgattacttgcattgttaaagctgatacttgtaaaagactgga
ttatattggttcggctagtggagtgatggatcaatcagccatcttttcattatgtatttt
gaggatggccctgcgtgctagtgcattttttttaggatcaattgtaattaaccaactaat
aaagtagttgattttgagttttggacacgtctctggtaggagtagtatgtagctagagca
tttagtcctatggcatgattatgcatatctgctgctccagaggattattcaaccacattc
aacaagcaggttttgcttcctgactctcatgagatgcaaaagggaactgcttgtattatt
ttcgtagctcaggctacataagtagtattaggatatgaaccaaatgggtgttcaaagcta
gcagtgtggtagttgatctatatatatagttctgcatatggtaatacaattatgctttgc
tgtttctttcttgggatgaagtctgaacctttgcatgtgggtggtcaggaactcaggaac
ccatctgtcgcaacctagaaaatatgcatctcacccatcaaccgatagcatgtacagtac
aaatgcatggcagcgctgcaggtacctatgtacatttttgtactttgagaggacgtggta
ctgtgcagctagaaatgatgtgaaccccccagcatgatgggaagtcatatagaatcaaac
ttggtgttacagtttattaacttgatcaatagacatttacaaattaagcagattaatttc
taccttgcctaatataacttgatcagataaacacttttgcattaattaatactgtttaat
tatatttaccatagtaaaatgcttattcaagttttggctcaccttttaattgttgtgtgt
ggtagatggaacttgaagcc
>Pgl_GLEAN_10027659 PgMYB75
gcagtttcggtcgcacggagaggtcttcgcaatatgggtttgacggaaacgctaatgctg
ctcaggttacgtgagttttgttgcgcaggggcggtccatcgaggcggtaccggccttcgg
tgccgaaggcacaggtggctgcacttcgacgacgaaggttcgagagggccagaagcactg
cgcgccggccggggacatctcgtccgaggccggtggcagcacgggcgagatgtccagaga
ggcgcgacgcgaccggagcaagaccctaggctgcttcggtgccgaaggtgcggcgctcca
ggacacgtggctgctgcgaacgtgtaaagagggcaccgtacgaggcggagacaaggggtg
ccgcgtgtaaagatgtttcggtcgtacgaagacacgctggaggcctgtacgacgcgggga
gttactgttatacccttgtaaagtgtttaaagccgtttgtcaggaacggaaaaggtgtaa
ttgaggcaaatgactatacccaggggtctcctataaatagtgaaccccttgtaatgaaac
ggacacaccgtaatgagaagagagcaccgaaggcagcggctggtctttcggttttcggtc
tgctgagtacttccttgtttcctttactgtgttgttaagttttagcatttcctttccttg
cgccagtagaagtagaggcctcgtggtagcaagcgaagggagggagagaactcagagggc
tgttgtgtcggcgttcacccttcgggcccgatttccaccaacaagccccatttcttctct
gttattacttcgagagtttactcttggcttactactgctacaagatgtcaagagccaggt
gtcacttggaaagcgtaaagcatcagacttactaacggttaaacagctagttttgtggcc
gcaccgtcagtccgccacctcgatttgcacatgtttgcatgcagaatgcatgaagcgctg
gacaaaaatgtgcatccgaatcctttgcacgatgcactgatcagtgatgcttttatttct
ctctaaattatatgttagattgtggtccaaggatcatcaaaggatcacaattagtacctt
atttcagattatatgtggtcctaatgttatatttttaccattatcactcatcactcacaa
accaacttgtataacctatttcttggggattataatccaaacaaacagggtattaaccca
ccaaacacctgtgctaacccattcgcgccgcaggactgcaggagggcgcctacacttcag
gctgcgatgcgcaccccaaaagaccccatgccacgagttgaagaaaaagtatgaaggctt
ctgggggagggagcatttgcaaatgcagcacatgacaagcgacgggtgccggaggagcag
ccacagccacgagaacgagcggcctcccgaaacctcctcccctgaattcccccaccggat
tggattatttccgccgagaaaaacgcggccaggaatcaagcgagtgggaaaaaacacgac
ggggaaagcggaaaaatccagtccgacgtggcgcgctcgcccatgctctttttctcccgt
tacctcctcctctcgggtctctcgaccggtcgaccccgcctcttcttctcttctccaggc
tgcgagccgggcgcccccgggcctacgttaaaacgttcgcctcccttgcctctcctcctc
ccacacccccacgctcgccgtcctcatcaacgacacgagctcgcacagggtcgaggctgc
gatatttgcaaaggtcgggcctactagtggcggcaaccttggggattggtcgatttgggt
tggaattggcttagtctcgagcaccggagatagatgatggcctgtctggaggtaattaat
tcgttgatctttctatcctgctttcttggcgtgatcgggccgggagggatcgtttcgcgg
cggcgattgggattgcacggtgctctgttaggtacctgatcgttagatgcttccccaatc
gttttaaacaggaaaaccag
>Pgl_GLEAN_10027682 PgMYB76
aaactggatatggacacatgtgattgtgtagtgtagcggcaatggaggcttcgcgcgaag
ccagagattggggtcccaaccccacggagcgcgtagagtcgcgattttgcgcgaaaaagc
cgcggcttgtgactaaaaatatttttttatttatttcaatcatttttaacgtagttttca
gacttgggcgacctgccgccgtggctcacggcgtttgcagaaccctatcgtcgtgggccc
acggcagttgggcctgccgccgtcgcgcacggcgaataggcctcaaccgccgtgacccac
aacggttggccgtcaaatttgataaattttagaacggtcctatacttttgtaaaatgaat
aaaaatatataaataaaaaaatccttgaatgaatgaatttgcttgcgcgtcggtcacgca
tgacgaacggcccacaaggaattggcaacgaggtggccaaacttctgctcgattgcggcc
gtcgtggtccggtagtcggcggatctcgcaggcacagtagaaaaacttgagctctgccga
gaaggtgaaacaagtacgtagaaggtattccagatactgagatacatctccagaacatga
aagtgcacagtaaaagttgcctggattcatttaggaccatacccgatttctgtaataaaa
atgcgagtgaggctgtcacgtactcacggcctcatgggaggctcgttctttggtaaatta
aaaggttgacagtgattgataagtatttttaatcattatacgtggctacctaatacaggt
actactgtgtgcagcgaacgttttttttttatcgtcgattgaatgctgacagtgatttct
aaaaaaaataaaattgccgacagtgattgtcgatacgtgcttgttgcctacttgtactgt
actagctaagggtaacagccgattcaaatgcttttacactcgtaagctcaccttcgtgga
cgaaaaggttgcagtacgccagtaccgatcggaattaattggctcactgacaagaggaag
aggaccctacttgtatcggaaaactacgacatgatgctttacttttggcgctgaggctct
actctaatccattattcacccgtcgtgttctcatccaatcgagtcatattttctcttata
acatgtgtctcaatacgcattttttataacttttcagcccaatgcactatttcaatccta
ttcatacctaactatctggtgagaatactgaatactatggcaaacgtttttttcttttgt
gaactctactaggtaattgatgctgtatgcttaattttgtatgaaccacatactacgact
agcacaagcgtgcatggcaaatgaagaaatgctatcagggatttgattgatgtctgattt
attttcagacaagtgatactacaacgcagtcaatttgtgtcctttggtccggtagtagta
taaacgagggacgccgcggctgtgagcgcacagcagccacacaaaccttgtgcctataaa
ctatagctggcgaccggcgagggcgctgctgagcgcgacagcgcgagagggacggcgggc
aagtgggcggcagtggcagcgcagccacaaacgctcgcccttcgctcctcgacgcctctc
gctcgcagtcgcccgccgcgcaccacgcgagannnnnnnnnnnnnnnnnnnnnnnnnnnn
nnnnnnnnnnnnnnnnnnnnnnnnnnnnnnnnnnnnnnnnnnnnnnnnnnnnnnnnnnnn
nnnnnnnnnnnnnnnnnnnnnnnnnnnnnnnnnnnnnnnnnnnnnnnnnnnnnnnnnnnn
nnnnnnnnnnnnnnnnnnnnnccgcagccgcgcggcagctgctcatcacagccagcgggc
gaagcgtagccgcgcgtaggccttccacctccacctccacctgcttctcctccctcccca
gcgagcgagagggcacgacgcgaccgtcaccgcacgtcgagatcgatcccccgccggctc
tccgcttccctccctcttcg
>Pgl_GLEAN_10015401 PgMYB95
cctcccacaccgtcgcggcctcaaggtggatccacggatgcgcgagagcagcggcggttg
gcgtgcaacacaaatgagggctcttgtcgggagctcctacatgtgagggtagaggcctcg
agggggatgagagtctctcatccgtcgggagccggatgagagttgagttggaggtgtttt
ttttctcctgaactctcaaaatcaagaagagaagggggatgaggcatccgctgaagttgc
cctaaacgtctcgtgtatgcagttgaatagctaaccaaacttttcttttttgctgttgcg
aaagtgagcatagcacgcggtccttctcttgtgcctggacttgtgcccttgtatggaaat
gggaacccatcaatacagaaaaacactcacaacggaatgcggttgcatacgctatctacg
agcacggcgccaagggtcatggcgcaattgaataatagcacgccattacccgtggcgcca
tgttattatacaacggtgccacgcctttagcgctgtgctgccaatgtggggtggagctcg
ggaaagggccgcacgcgaggggcgccgccggctgcccaatagcctatgcggcgcaatatt
gaatttactttggaccggtggttctccaccttccggtcgacacgtacacacctatactca
ctcgacaccgggacaccacacgcatgaccgaccccaccattttcttttttttcttcccca
acctcctctctcaccgctccggtgctcccggtttctcttcctctccacttctccctccag
atccactaccgagagagacaccttccgtgcagcgagctcccagtagcggcactcttcccc
acggtccagatcccctccgcgcgcgtgagctcccatggcggcggtggctaccgcgggtga
ggtcccccggtggccgtggcgagctccccnnnnnnnnnnnnnnnnnnnnccctgcgcgcg
gcggtgaacgcccaggtgagctccccggaggagcggcggcgtgcatggctcccacatcgg
ggcgagccggcgctggcgatggcggtcggtagctttttctttttctttttaaaacaaaat
cttaaacttttcttttatattttttacaaatctttgtttataaatgtttctctaattttt
tttagaaattctttccaaacattttttcaaaacatttcctcttttttccacgtaagtttt
ctcaaaaactttttctgttcgaataaatttttgtttagatattttttttgaaaattttcc
taaatattttccttttttcacgaagtttgttcacaaactttttctattcgaataattttt
ttctcacaattttttgtttttaaattttctcataaacttttatttagaaaatttttctaa
atttttctttccaaaatatcccctgaatgttttcgaaaacgttttcctttattttttcga
atgtttattcacaaactttttatctgatccattgaatccaaaagaaaggcaccggagatg
atacacgtgggaacggtgtgaacgcgaagtaaactatgggaaagtgaattctcgtcgatc
gaccgcacgcaggcatagttacgggcgcccgtatgccattacgagaaaaccgggttgcca
ataacgatcgtgcacctcgtgagcctgcaccgttggtgcgagccaagctgcggcgggcaa
ggaaaccaatcaggctcatgcttccgtttcctacagggatacgagaaacgtatccctcta
cgactgtctcgccaaccccatctctctcccacacggccacaccactcgctgctgcatgcc
ggcgctgcgcacgggggcctgcgcctgctggtcactcgctcagcacgttgaattgcagac
gggcataatgctcacgcggtgctgatagccacgtatacgtatcgctagccactgctacag
actcactacagatcttgcgcatagtaaatacgccgacggagctagacgacgacacgccct
gctagatcagagtgggagag
>Pgl_GLEAN_10022511 PgMYB97
ccagattgtgtatatgatcacctgcatgtgttcatcacagttccccgcagcgcctcgtgt
gacagcgtgccaccacctacgcatactggccacattccgtggttgaagctgcaacgtcga
ccattaactgcagaatatctcattccaactatcggttagcccgggggcatgctacaattg
tcatatgattgcgattcagctagctctccgtattcatgccggaccaagtggataaccatg
tgccatacgtacgtcgaaacacgtaggacacaatgtgctggactgctggtaacataaatt
caggtcctagtcactcttctggtccagtttttcatcgagatctcatttaactcatgggat
gccgccacgagcatgtgtgtggtactactactactaccaacggcaaaagaaaggcaaagg
aagtcaaggcaacggcgacgccgcgacaccaacgggtaacacctggactctgaaccccgg
acggatggatggcaccaccgaggccttttgttgcctctcgatcgatacctctccaaggaa
cccaagcgccaactaccgaaccatgtccctgacaggtcgggcctgcccccagtccgcaag
tcacatctaaaaaaaactcccttttccctgtgcttgttcagtggaggagaaaacaacaac
aacgggtggctgcgaaagggaaaacatgtggacgcggagggttcccgagcgacgtaaacg
ccaccaccccccagggagggaggaccggaggagctccgagcttgtggccaccgatcgccg
gcccgttgctctcaccctgcacggaacggcctccccgtcgtgcttatctagtaataacgg
agccaggtgtcgggcgtcgaggcgacaggaccggtgtttgggctcgggggatcgtgtttt
ggtggtggctttgacgtgtcaaaaagcgcagcgacggcgggccccgcgacggcgctagag
ggcttctctgcgcttttttctctcccatccatccatccatccatccatccatccatccgg
tttagcagggaagtcaagcaagtcacgtttcgttgcaggaaagcagcagcaaagaggaag
ggaaacggatattattgatcagatcaggtcacaggaattccaaaggcccccccagacaga
tatttctcggagatatttcggtagcagagcaaaatcgtgatactgttagctcattttcgg
caggttaagtagctagtactgatgataaccgaaagagcacgccagaagttgcagagaatc
tggggaagttcggccttggctttttgccgagatttttcacccgatcgaacagcctggtgc
acccaccgtcttcacaccgacacggcgacacatatccgcaaaagccagcagcaccgggca
caccaacggcgacgacggggcggatggataggaatagagcaagagcaaccccacgacagc
gcacggtttttactcggctcgcgcccagacagcagcataattgagacgaggccgagccgt
cgtggcggcggcggtggtggtcgagctcgagcagctggcgccggggcagcagcaacccgc
ggagcagcgacggccacaagaaatcgagcggcgcacgggcgtcctcctgccgccaccgcc
gcccctccgcagccagggaggaccggatagatagattattcatcaggcgacgcgacggga
cggagggggggaaagcgcgcgccgaaaagtgcatccagcgggcaaaaaatcccgtccgac
gtggcgccccggccgctgccctttttctccgcccccctccccctcacgctccatttcatt
ccttgccctgcctcctctcttctctcaactcctcggactcctcccctgcctccgcccccc
ttcgagacccggtcgccaggatcctggaaggggttgtgttggtgatttggccctggtgca
cgcgctcgtcttcttcggttggtgaagagccggcgagcaggagtttctgtcggcggttct
gctggttcagggatccggag
>Pgl_GLEAN_10010695 PgMYB70
tctctcaaaacaaaccagccaccaacaaccagccagcagtactcttctctcaaaacaaac
cagcaccagccatcagccaccagccaaccgaacatgctgcaaatctatgcgtgcccccgg
ccccaaagaagaatctctcaacctcaagctgacctacagtcctaggcatcggaacgggac
ggcaccttccaccactcaccgttttactcgcacctaattgccaccaaaaccgccgtttac
aatttcacgcctcggataccgtcgtccgatcacgcccaacaggacacggatcacttattt
tacggagaagaggcagaaattctttttttagttttgggcaacgagccgcgtagaggcaca
attcaacttcgtagatcacgtaacgtagtgccacggatagatgctaaccatgtgccctac
agtagccatcatgatttgaattattttcagtagcacgagaaatgagcgttatgcatcgag
cacggcagggatgagcattatgaacccggcggcagcacgcaacgaacgccgcgacgtaac
cgtcggcaccgatcgagctcgtagcagctagctagctcctcggtctcgcgacgctagccg
gcgctcacgctgacgccttcgtcttctcgacgtgcggccaagcgagatcgatcgggagaa
caagacgacgaaaaagcgggaggcgatttgggggcggggggcgctcggccgcctcgacgg
gcggggggtgtggggcggcggtcaccgccaagttggcgccgcgaatattccctcccgccg
gggccacgcgacgccaccgccatccgccaacatatctccccgcgtccctctcgcgccccc
gggagggccccactccgcttaccctccagtccttcaccgttgccccgccctttcgctctc
agctcggccgctacgtgcggccgccggaatattcctccctcggcaaagccgcaaaggcct
ttgggcagcgctgaattgcttatcaccacacccccctcgtttggcgctggtatatccagt
ggcgtcgttcttgatcacgggctcccggccggtgcggcgaagctccggctgtcgcctcgc
ctgcattgaccgccgggatgggcaggacagcgcacagtgctcccgaggcaaatctagcag
cgatcagacaggcagcttctctggcctagaaccggaagacacagcaccgcacgcacacat
gccggccccgcccttgtcggggggcggcctccacgtggcgcgccgccgcacatgccccct
tgacctgtcctgtccgcgcgcgagccctcccgatcgaacggcgtgggcnnnnnnnnnnnn
nnnnnnnnnnnnnnnnnnnnnnnnnnnnnnnnnnnnnnnnnnnnnnnnnnnnnnnnnnnn
nnnnnnnnnnnnnnnnnnnnnnnnnnnnnnnnnnnnnnnnnnnnnnnnnnnnnnnnnnnn
nnnnnnnnnnnnnnnnnnnnggcggcgctggcgttttgccggccgggggcttgcctcccg
gcacaaggctccccgagattccgcgcacacatgcctggcgagtacatggcgatgatgatg
gcgaggccgatgccatgccatgccgatgcgctcgtcctcgctttctttctctatctgcta
gtagtacttattcctcctctctcactgtgtgtccgtgcctctccgcccagctttcgaacg
cgccactcatcgcacacattcccgtcgggaatccacctcgggcttcgccgaaatcctacg
ctacctccgcctctctcccccgcgagcaccagattcacagcgcgcagtgtgcggcatctg
cttctagctagctgcaggacacgcagccggccgggcggacgtgcgcgcgagcaagcgtac
ggcgagtcgcagcgtgcgccggcgacggccccagacctgcagctagcggcgtgaccggac
atccggcggcggggggtcggggagcgagggggccgatcgagaccgagagagatacacagg
cagcggggtcagcaagcatc
>Pgl_GLEAN_10030848 PgMYB82
aacttgtaattattggcttaataacgtcaattaaaatggtctcaagtatcccgttaatat
gtgtgcatgcttgcataattattagtccatgcaataaattgttgtaggggtaaatattgg
aagcatttggaagcattttacctttcactgattagtagccaagataacagaggggacaac
acgccatgaggatgctaaataatattcaccggccaggctgctaaatgtatgtttgcatgt
atgtatgtatgtacgtacgtacgtacgtacgtatgtatgtatgtatgtatgtatgtatgt
atgtatgtatgtatgtatgtatgtatgtatgtatgtatgtatgtatgtatgtatgtatgt
atgtatgtatgtatgtatgtatgtatgtatgtatgtatgtatgtatgtatgtatgtatgt
atgtatgtatgtatgtatgtatgtatgtatgtatgtatgtatgtatgtatgtatgtatgt
atgtatgtatgtatgtatgtatgtatgtatgtatgtatgtatgtatgtatgtatgtatgt
atgggtcacaacaatcaataactcaattaaacttaattctattatgaactaaattgcact
ctacattttattaactattttaacaatatatacacggggcacaataatcaataactgtca
tctataacttcacttaaaattacctcaattgtataaaatcacttaaattaataacctcaa
aactaaattcttctattttatttaatgaaacaaatgaaaaacatagcattacacttatta
cattagaaacatataattctacttaaaaattaatctaaaattaattttgtgtctcttcac
acctttctgtccccctagctagctaaccctagatctagatctaaatctctaatgaagcta
gaaatgatggataaaaggtgaaccacatggttggaatagcacaaactcacttctttagcc
acttcctccaaggaaaacaagaacaaagcctcccccctagatttgccgatttggtatttt
gaacttttctcaagctcctctcaggcaaagctccaatggaaggtttgctaagaagaagaa
gctaccgaaatattatagaaggcacagtgcacggggtgccttatgccacccatcagcaca
aatggtcacatctgtactggcgggtggattatgctgtccgccagcactgtggctttactg
ctgggagttcctgcccgggcgcccccataaacctatgtgctagcgggtactataaattgc
ttttccaagtgtaatgtatctagacttgcaaacgcaaaatagtttggagagataagagaa
gtgtgtgatttgcagagattctcatttgctgctgtccttgttccctgatataatatccac
cgtaaccctctacaaattgaacgcgtttctagcctcacagcccttctctccgtataaaaa
atgcttcatgagcaggtccgagcatgcagcaggagtaggacagcatccagacgatatgct
tgcagccgctgtcaacttttgtttgcttcttcctcgcctttctcacgacatcgagtccat
gaaaagaaaaaactggctccaaaaaatactcatccacacacaggctctcgctgcctacaa
gccccgcaataatttgcagaagcgacgaagctgcacttgcgctcgcggacaaggtcaccc
atcaaatgaatcggcgaaatatttgcgagcttgtggttgcctgcttctcccttctcccct
aatactccccggagagagtactgacttgccatcgcaccaaatggtctctaccacctcatg
agcagccgagcaaaagaaacgttacaacaacctacccttacgcgccattccctccactgc
actgcattctgcgagctactactatacatgtgctggctccaagtgtatctagggctactg
gctagaccgctgagatgcttgcagtgtcgctgataaggtgcgccgatgtcgatgattgcg
gcgtaggcgccggcatcgag
>Pgl_GLEAN_10031135 PgMYB68
catgtgttcgttcttatgtgctaatgttgattgtttttcagaaagtgttcctgcagagga
aatggaatagatcagcatcatgactgtaagtaatttcacagttgcaactgctccttgctc
agatttcaaatggaataagcactcaagtgctctgaactcatctaaactaaagcttatttt
ccttccttccaggtgagattactgagagaattcgatgtctacacacatttcatattcagc
aacctcatctaacagttacatagtgacagtagttataatttaagactacccaaatactag
caatatgaatggcaagtctgatagaaatgagtgactgatttccaagctcactgtaaacag
tactttacatgtgtgcctgtgtttggctgaacatcataacatcaattgcttccccctttc
tgcttcatgaaaaagttgatctgagagattttgattatgcttattgcatatatgtaaatc
tgggaactgaaggagttcttgctcctatttttcttcttcaagatgacaatttatgaaaga
ttactactagtttcattccatgttgaccctggtgatttgcttacatgttgttcattcttc
tcgttttcatttgctttctgaacatggaacacaagtttttgagggtgatggatcaaatat
tggtggcgactcataatctgactgcaaacattgtttcacatcagcatagtgtatctttac
ctctgttaaagctactgccattttcattctgtaaaccaagtgatggccagttgacttctt
tcctcgattcctcaattaaatcccccccccactggttatagattctacctacattggtac
accagatcagaactccaaatataattaatgaggtgcctaagacctttcagttttatatat
ctgctgttccgtcgtttgaatgaaaagatgcatggtgatggataaagtcaaaagataaaa
cttactgatttgttaaaggtcattgtcaggccagcttttcaatggaggcttggtacattg
ccaaattgggtttgtcaactccaaagcatatagctgcccaaaaagaactaggttgcaagc
tcatcgttggaatttattatagacattgcttcatccacacagttagctaatcagacagaa
gatttggcgaggcagatattgaaaatttattataattagctttattcacaatatacacgg
ctgggtcttgatatatctgaagccacaggttcctgcactgtactagaaacttagtttatc
tatcttgagacatgtaaagattaattttttttatggaatacatgttactttgctcagggc
aaaggttgggtcattgggtgcacaatagctggttggttttggtaattattgttttctaaa
ttaagattatgttgttcaagttgctacaacatgggatgacagtggactattagtttggtg
gttgtataaaataaaggggtgtatgtagcagatccagaagcatggtccccaccccagagg
cccagacccctgaaaggataaacaacctatgattcctgaagaaacaagtaagaagcaccc
agaagccaattccaggttactcttgttgcagttttctttctgcttgatttctctcttatg
atctcttctttgatgctctatttccttgtattcttcattgcatctgttaagtcttttcat
aaactgctttaatagtcatatcttgttgtaatcagtaatacttcctttcctttttatctt
tacatttaaggagtgatttgaatccacagttcatgttagatgtctttttcaaccctttgc
agttcattctctattacatcatcaattcatggttattttagtttgcctgcagtcactact
aactagaagtaattttgttttctccagtgattttcttctcaagattgatgaaataaatct
ctgtgcttggtggatgatatgaccgaagcttcactttgacagacatcactcagggtactg
catgtagccatacatcaacc
>Pgl_GLEAN_10018049 PgMYB96
gatcttaagcccgttccggcggcaaaactactcgttttctctgatttttcattcgctttg
gctttccggaaagtgctttttgttttttgcatcttaagtccaccccgcgtggcacaaagt
cgacttcttcagtcgcatctcaaagttcgttctgcgcggcattctaaagtcgacttctaa
agtcgcatatcaaagtccgctacgcgcggcaagtaaagtcgacttcggttttcaagtcgc
atctcaaagtccgctctgtgcggcaccctaaagtcgacttcggtttccaagtcgcatctc
aaagtccactctgtgcggcaccgtaaagtcgacttcggttttcaagtcgcaactcaaagt
ctgcttcacgtggcatcacaaagtcgacttcggtttttaagtcgtattctaaagtccgct
ttgccggcatctaaagtcgacttcggtcgcaactaaagtccgctctgatggcacgtctac
ttctcaagctccacggctcgacgccaaactgctacttatctctccagctcgggtactact
cgaggataacttcagcatgcttcgctcgctctcaagctcgggggctcctcaccaatcact
actcgacgtggctcatacagctctcttatctcgggggctacacgctgcaagagtactcgg
atgatggcttcgcgaacactgaagacccttggattgattacctaatcatttcaaggctcg
ggggctgctatgctacacccatcattcaaattttttcaagactgatgagctggaccacct
tccagcctcgcggcagttcaagtactattgaagacttctccaagcagtactcgaggacgc
tcaagaactactcgaagaggcttcaagactactcgaactacaactctcgactccaacgtg
ctcgggggcttgtcgggcatactccccgggtactcatgcaaggaaggaagaatagtagaa
gacggactcctgctagaattcccctgtactcctactaggactcgctctgtgtaatcctac
taggactcctgccttgtaacctactaggaacccgccccctggactatataaaggagggcc
gggtacctagccgcacatccccaatccctccggggacgaccaacaccaagcgcagggcgc
catacttgttccccaaacaggacgtagggctcgccaccttggcgacccgaacctgtataa
atcttgtgtcccgtgtccttgcgcataccttcgagttctcggtctcccgatcacgatccc
caccgcacaatctactacctcgggtaccccctcggtaggtttgccggtctaaaacaccga
cagcaaccagccagcagtacttttctctcaggacaaatcagcatcagccatcagccgcca
accaaacgaacagactgtgccaccagtcaaacgaacggactgtgcagtaggttcaccgtt
cacagttggcaccatcgatcgaacggtgttggttcgcactttgcaccgctattccgcgat
aggcccaaacgagacggttcagacagctaggtagcgtagcgcggacaggaagagctatac
tacaccatacaagagggagggaattaaatttcaaataaaaaacggtgtgatttttttttt
aaaaaaagggagagaacgaagtgccgagaatccagcagcttataagcctacgcccactca
tcttttgagggcgcggagtgaagaaagagcgaggaagagacacgcccaccgcgaggagca
gcacgcagcttgttctctactactagttcctctcaagctcgcaacacctgctggctgcgt
cttcagctgccggccggtgcagcacctctctggccgtgcttagcaagtcagagaggcctg
gaggagagaggtgccgggaggagaggagtggggaaaagcggaagtttggttcttccttcc
agcacctgccgcggcgcgcctccttgctctcgggctccagctagggaggtcccgtcgtcg
ttgcgctggcgatcgaggag
>Pgl_GLEAN_10000886 PgMYB88
ttgttgggtaatggaccgtaccgtttctcagccagttactttggctcgtgactgatttct
tctaggagaaaagtattgttggctggtggttgataaaccaaataagagcaactccaagag
actagctatcttggcttaactagctaaaaaatagaaaatttctccaaaaactcaatccaa
cagactagctatcctccactagctaaaccgggggcttcgctagctatctttggctagcca
gtcccgctagctatccccttgtacatgagtatggcaggcgggacccactagcggtggagt
atatggagagttgattttagctagtctattagatttcatcaactttttactagctatttc
atttcacatactacccaaatcagtaatttagctagtggaatttagagaggctcttggagt
tgctctaaatagggcgtgctgaagcttaaacatggagtgacaatgtcatatacgatccag
atgccatcagactggagcaaagaattcctatgccacacccgacgccggagttgcggcgtc
gccgccccactgacgtcgccacactctcctttccatgaaacctgacaccagcaggcacaa
ccagagctccgtcgtcctctcgtcgagtgttgccgcgcccccagccgacatgtgatccca
ccaaccaccatggcagtgcatccggcatggacactgccgccaccgcatccccacgtgcga
tctggacacataaaccatgcgacggaacgccatggtggccgagcggcaatacgcacgcgc
aaatagcacagacagaggcagcggtgcacgacccgtcggtgctcataacgtttgctgcag
agcaaagtccacttgtcggctctcggctcgctttcctgtgaccaggggtgtgtaccacct
tccgaaagatatataggaattcccaagatttcaattttttatttttttcgattttgcaaa
aatatatgccccatctcaaattttgcaaaactacactactaccgccatatgatatggcgt
ctgggtctaaccaccatagggtacggcggttggaggtgctatagtgttccaaacgctata
tcacacgacattagggtacgacggttggaggtgctgtagtgttgcaaccgccgtgtgata
tggcggttaaggtcagtttgttttcgaaaaatcataacttttatatatgaactcggatgg
agataaactttatatgaaaattgcagcttttgacgagatctacaactttgtagtcaaacc
ttttcatttgaactcatcttcaaactcaaataatcaatattctattcagatctcaatttt
cagtacccagatctggtagtatattgactatttgagtttgaatatgacttcaaatgaaaa
agtgcaaactaaagagttgaagattttgtcgaaagatataattttcataagttacaattt
tcttaaaatgaaccgaccctcaccacagtatcacacggtggttgcagacgctacagaaac
tcgaccttcacaaccactatgtaatatgacgtttgggcccaactgtcatattatatggcg
gtaatggtatagttttgaaaattttgagatgagacatatacttttgaaaaatcgaaaaaa
atataaaagtaaaaaatccaaaatttcggaggagacatgcacatggctcataccggccca
tagactgatgccaggccagttaaggcccaaaccgtatctcaaaaaaaaggcccaaaccgt
atctaaaaaaaaggcccaaaccacgggaccaactaatgaattcccaactaatacacgtgt
ggcacgcgcgtacgtggaaatcctcgtcgtcctcgctcagacaacgccgtcaccgcacgc
cgggtcgcgcggatccctgcccatcctctccgaccgccccagcggccgatcccaaagcca
agccataacccaccttaatctgagatccgacggcccagatctctcctcccctgttggttc
cccaacttcccgccctcccc
>Pgl_GLEAN_10031924 PgMYB102
ttaggatttgacagtgttgatgcaccaatggtaggatctgggtggcagcttcgagccttt
aaccttgatttctcatacttcttttcggatcagggagattccaaaagagtaaccagtcca
gtgcgcattggatacctgcacttctttctaacggctgatcgatgactgctctccattgga
ctaaagcgatgaatgttaatgctgatttgattttactttatgatttatcggttagagact
gatgaaagctgagcttaagagaagtgtatgctactgcgcttggatttgtggatcaactga
aagtgccacgataagcttctgtgactttgcagcaagagttatgataagaggaagaggtta
atgaaaagacgagccaaggcttttgaatcaacaggatgaattgatgaagggagtggttaa
tctgtgaattcaaggtaccatgaacagttctaataaggacaggaatatgctcatggcagt
atgctgtttcaactcttcattatgcaaagatcaaaacagaacatcacaaccaagaaggtt
caaattcgaagtagctagttcttgtgatataatttactcgaatctgaattatcccgtgga
atgttcctgacacagttttactttgcccaattggtggaaaagaaattgaccaacaagact
tcacttagatacgtgctaacaggtacaattccattaaaagatgactgaaacgaatgagaa
acaaatgtctttttcaacagtaaatgactaaatcaaacaaaaacagggattgatgttacc
gtgctatttaattgtaccttaacaagaatcacacgcttatgtatatccatccctaattga
aaaacatatctgctatttctttggctgttgatttttttactaccacgtcctttcaatgta
gttcttgtccacttgtttattttttatgtaggtccgaattaacatcacatccaagaaggt
tcaaattcgaagttctgtttgattcagcaattaggctaccctaccagaattatgggtatc
aattcagctcttgttgggatatcaaaagacaaacaggacataagggttcagcatagagat
gtccccccagatctttactgtaattttgtatgcttgcaatccagctagaaatgggtgcca
taagatccaagccatgctaattgctaacggaggaaaaaggttgagacggtgaaagcatca
aagccagagtttgtcccctagccttgtgtctgtacatgcaagcttgcactttatatagta
ggtagatatctttgcatcttattgttctttgtcagttgctagttgcttggcttccatcag
gaggccctggtccccccacagggaggagttcgttcatattccaattgggatgaccaggaa
ccccttctgcacccattcctcattcccaactctcgtgcagattccaatccttcctccaga
tacagagtgagggacataatttccaggaaatctccattgctagaagcctgctgcacacat
gtgatgccttcaacttgtaagtagctctaaccatatctgctcatgtgcatggcagctatt
cctcccccctacttgcttgcattgccgtgttcttgcttcctcctgcggcggctgcagcat
gctcgtcggctgtttggcaattcccagtattggtctgtgtttctccggaggcactcatcg
ccgtcgaattattctcatcacgttgctcgacacgccaccgggaatccagactggtgcagg
atcctattcttccactagaaacccaagcttccaatggatggaagtggaacctttgcatcg
gccctatttaagcatcacttctgcactaatctttcttctctcctgctccaagtgttgcct
taattggttgctataatataagctgctgttttgaggtctcacaaaatgctaaaataagtt
ctcatatataatgaacttcaagaagcttatcttgaaacagttgacgagctagatactttt
ttgtgcttgcttgtgtctag
>Pgl_GLEAN_10031939 PgMYB101
atggtaatagaaataggagttaggatcaatctggtatggcttatcttatcttaattcaga
aaatatagcgtcattgtttgtgagaatcagaaactatagtgtaaataactgaaacgtagt
agtcctttttccacacaattagcatttgttaggaaggggctcccctattcttttttttga
gaaactcccaattcatcttcgttcttttttgaaaagagactcccaattcatcttgtggaa
gatggaaagcaatccatcttttaaagcccattttgacccaattagcttttgtaggagatg
tgttcagcttttttattcgccacacataacatttaaaatcacctctttcaacattatatc
tcaggacgttaacatttatgttcctcatgttcaacatttgttatccaaaacgttgaaact
ataccagccgaatgttaaaaccacacaaaccaatagttgaatgtaaacaatcggccaaat
ccgataacggtaatgcttggactcagacgtacggagggaggagagaaaatcagacgcttc
gtactccacaacggaagaaagagtcaaccgcccaccatttctctctcttccttttttctt
cttctccagcaaacagagctcctccaccggcaacgacgggcgccgacaggctctcctctg
gcggtggtgcgcgcctccacggccagatgcgccaccgcgcgcctactattaggaagcggc
ccttagagcaccaaattttctagcaacaccacatatttggttgcaatagttggttttata
gcaactaacgtattaatgcgttgcgatatctgggtgtaacctctgtatactcagctctgt
ttttattttgcccgcatcttggtgaagaactgggtggagagttccataaaatctggtaag
attgcaagacgaaggcttttttcacttttcacttagtatactcataagtctgaatatttt
ctacattttgtaactgttctcatctccccccactctgttttttttttgttagagcaactt
catctagtaccattggcaatgtttgagaccggagagaaatatacgccacacttaacttct
gagagatatgcaataacttatattgttattggtttctgatgtcgaaaaaaatcatcaata
gtactacccaaagttactttcttaaccctcacatgacagtgttaactatgcaggcactcg
caacacagtgttctcgctatatataacttccgtggatctgggaattcaagatgcaaagca
attcatgatgcagacgggttgttttgatcatatactgtgcatgttgaccttttcatttga
tttgacaactgtcgtatactgatatgacttgtgaacgatgctacatattcagtacggagg
caatacacggagtcgcagagccttggggcccttgtggccttgccatcaacggtgttctgg
ccatctctacattatgcaagaaatggcacatccaaatcggaatgagatcccacttttgag
tcactgacatgtgccaaatgcacctaccacatgtacatatatatgagcaagactccggaa
atactgatattggttttgcagtgtagtacatattcgccacaaggcatgttgcgtctcaat
cactgtagtctctgaccatttcgtctctaaaactatagttttgcagtgtgacaagtgatg
catgcagctctcgccgttcaagtcgttgctatcagtatggaagtctccatggccggcctg
atgggggtggtgctgctgctacttagcctctcgatgattatctctctagatttagcagtt
gtaactaagtcgtcccctcacttaactatgttgtcccttcgaattgtaatgtgttaattt
gctgaacaaaattgagtctcttgttaacatcctgtgcatgttgtttgatgtttgcatatg
tccgccgcgtccactcccacacgccgcgaacgacctgcagcccctgccccaagaaacaag
ccgcgaagggaagggaaggg
>Pgl_GLEAN_10023931 PgMYB113
gctaggccataattcactgcacactataacaagtggtattagagccaaaggtcgggaaag
caggaacatctctaggttacacagatacatgtatcaatattgacccgataaggatatgac
atttttttgcaaacaaaccccgatacgtggatacatttttttatttttaaataaataaca
ctacataatcaaatcaatgaaattggtaaaaaaactctttcatcaacgaatttgaacgaa
ctgcatcatgaagcaagcaatgcagtctactatttaagattttgcaaggcttacagaaat
cctgctcacattcactgagagcaactccagcacagcccctacttgagcccctactcaaaa
agtaggggctcagagcaaaaaaaaaacgaagtctatcagcccctctactcgggcaccaac
tctagggggcacccaacccccccccccctccggccccaactctcacgggtggagagagaa
ggcccctactctgccgatgctggtttcatccgcgcgcgcaggaggaagttgcccgccgcc
gcgaatcaaagctgtgcgccgccaccaaagggttccaccaccccgaatccctcatcttcg
tcgtgccgagctcccccaactcctgtcgccgcattggggtgttgctcaaggctcccactg
gcagaggcccaggccatggccgaagccggctcaaagttgggggattcgtgccgtcgtggc
cgcctcgagcttgagcacaggtggatccagcacctccgtcacgagattggcgagcaccag
ctctgtcgccccctatagcaccggcgagtggagaaacgagctcgattcgcgtggccatag
gcgagactcggtggcggcagatcaattcctgagatccagttggcggaggtcgagcacccc
tatgccgggccagagctcgagctctcgcgtgttgccgcccccgtgctgggtcggagctcg
agctcccgcgtgatggagctgccgcgctgggccagagtggaggaatgggagtggagggat
gctggagatagaagtggtgaggaagaaatagatcacccaatgacaagtaggtcccacatg
tcagacgagagtaggggctttagagttggggctgctgctggagttgagtctaaaattaaa
gccctagaaagttgggggcagcccctactcaacaaagtaggggctctaaataggggccac
tgttggagttgctctgaacaaccggatgcacccactttcaccgctacggatgtctgtcgg
agtacgccaggtgcagttgggcaggcatctcaagagccaagaggaccagaatatagggag
gaagaaatgggaaagaagaaatcaatccacaggaacactagatcaagaaatgaaaactca
aactcaccaaatgactgcagaaagcgagtgttgtgcccgtctacatgaggtgtagattct
ttgggggagactgcaaggagggcacagtcgacaatgccattcgtgattgtcggggctcat
cgtggacctccgcaaacgtctaggcgtacatgccgcgagcctgcgttgcatgtgtgcttg
gtgcggctgtgcgcattgtcgggggctagggtagcaagcaacaagaaactggaggaggtg
atgttgtgtgggttgggccgatcgagaaaacaagcaaatatgtctcggtccacatattaa
tttttcttgtatttattattttctaacacgtattggatatgtgatatctcaccgggacgt
atcgagataacgtagccatctcctaagttgttgacgctatggtagtgaacatgttgaatc
cttgtgcaccgcgcctaaagatggcaacaggtatgttgcctgcggatacaacctttgtat
gcctgcgcccgcaaaaaatctcacgtctgcgcctacgcccatcactcgccatgggcagca
aaccatccttggccggctcaacatcatggagtgagtcgggagctggtggtcggcaaggga
gttggtaagcgcagcgcgac
>Pgl_GLEAN_10018451 PgMYB123
agaggaaagagaaaggatcccgaagactaatgggaaggcagaaaaactagagtacgatgg
agagcattaattctagtgggcccgcacatgtgaaaagaaagaaggatgcgttgttataaa
attaaaaagagaaaggaggaggtgtcccgtgctggttgataaatgaaaagaaaaaaaaca
gagactgtagggagcgcgggagctgggtcggtcagatcgaccgcgcggagcgatcgacca
ccaaactgattttgcgggcttgccatccgaagagaacaaaatatgtgagaaacaagtaca
aactcaagtgctaaaaaccaagaaaatctttgtaagcgaggagaataaaccataatgcag
agctacacattgacaaataatacaactttaggcgatttgacatcaattttgtgagaagtg
gattaagttctcatgcatatttataacgaatttcagtgacttttacaatgatgcatgctc
gccttatctgtcctcacaagataaataattgctaaaagttttagtcttacggggttagca
tctgtgggaaatcataaattacggctctcataatatctagccgaatttctaacggttttt
atagcttaacgaatttgtgattagtgtacctgcagaagatcttctagagcataataaaat
gggttaattggttctgtgccattataaatatcgtatttttgaagaatgtcattactattc
aagtaaccacgtcagtgccattacaatttcgcagccgtttgaaagatgccattatgtacg
cgaaacaacgtacgcgaaacaacgtatcaggcccacttgcaagcataccggaggctctgt
attttcgtatggataagattaccccttactttcctctctctcgttccactgacgcgtggg
acccacacgtcagggttgtcttcaacctcctttcacctgcttgatgccgtgggggcaaac
tgccaagggggaggcgcagagcacacccagcaacaaaagctcggcaaggagcggcggcac
agggctgacgctggagggagccctacacggcggcgaacgagctcgggtcggcggcgggct
ggcagccagggatcttccattttcgcccttatgggccatgtatggcaacgaggagaggtg
gagggtggagcctacgaggtgtggaaggtccgggcggtgacgatctaaaggtggcgcagc
ggaagccgcggatttggccggtggtgggcagttcccgcgctccgcctcgccgtacgccgc
ggcatcctacaccttccgcgctgatgagctcgnnnnnnnnnnnnnnnnnnnnnnnnnnnn
nnnnnnnnnnnnnnnnnnnnnnnnnnnnnnnnnnnnnnnnnnnnnnnnnnnnnnnnnnnn
nnnnnnnnnnnnnnnnnnnnnnnnnnnnnnnnnnnnnnnnnnnnnnnntccgccgcgagc
tatttgggcagcggcgggtggctgtggttgacggcggcgggtgttgagtttgttgagagg
aagaaggaagaccgaggctgaagatgagggcaaaaaagacatttctctctcccttttcag
tctaatatgcctgcaagtgggcccgatacggtgttttgcgtacataatgacatttttcaa
aaaagtggaaaattgtagtggcactgacgcggttaattgaatagtaatgacattcttcga
aaacgtgatgtttataatggtacagaaccgattaacctctaataaaattgatctttcact
actgttcactgtgaaaacgacactcatgtgcttaacacggcatggacaacgccgcaacaa
ccgtgaaaatatgccactttgaatagaataaaaaaccccttggcatgcttgtgatgcata
atcttttgcagtataatagatgtggatgaacaactatgatgataggtttgtttgaatcga
accatatggcatatgctacccttcgcatgattaaacatacagaaccttgcgcacgtgtaa
taaatgtgggcaaaacaacc
>Pgl_GLEAN_10027372 PgMYB112
tgcaacagttgctgatttgtggatgcaggacacaagaacgtggaatcaagacctcctctc
aaccaccttctctcaggaaaccgtgcacattattaccaacacaccgatagtccactctcc
tgaacctgacatcctccgttggaaaccttctcccgacggccagtgttcctctaaatcctc
ctacaaactccttcagcttcagcagacccactctctgcccccaaccggcttcagagccct
gtcttcacattcccagtccatcctacaaaaaatttggaaaatcaaaactatgccccctct
tctcaaaacctttgcttggcgccttttcagacaagcccttcctactgctgatagagtcaa
ccgctttgctccccacataaatcgccattgtattacctgcggtcttattgagaatgactc
acatttgtttttcctttgcactattccccaccaggtttggaatcacgcccctctgcctcc
tgtagcacaacttatagaccctcatgcagatggaatccagcaactccttcctcacatttt
accccttaacatcacggaccataacctgatttatactcttcttatcctttggtacatatg
gaaagctagaaacgatcacagattccaaagaaaggtttggacttttatgcaggttcttca
tgctgctcactctcatttcactacaaactctcaggcttggcataatgatgttcataactc
tattgcaccccttctttttatctccttgcctaattaccatggttacagatgttacgtaga
tgcagctactactccggatgctcacaacgactccctcaagccagcaggacttgggatctt
tatagtcaatactgatataaatcctcctcttgctattttcatcaaagcttttatgcaggt
ttcttcctccgttttaatggctgagtcggcagccctagctctagctacctttatatgcag
gaacatgaatttacagcatgtcacctttcactcagactgtcaactcttagttgactgtct
taatgggcctcactcttctaatcccccagattggaggatcaagccttttacccactttgt
gcagtcttctcggatcaactcctaccggttcaacaagattcccagagctcaaaacttgat
ggcagattctcttgcaaagagagccctctacaacctcctctactgtcacccctcttctcc
tttaatttgtactaattctattcaccgtcaagtgtgccctctttctttggcactccgctt
tgtacccctcaactctgtatttgtacttgcagcttcttgctgctaattaatatattacca
cctcgtcaaaaaaaaaaatctatttttttcataatataaaaaaatccctcccatccaatc
gccttatttttttttgttgtccactaaaaaaagaaggaattccttccaccgttggaaaaa
atttccagctcatcaccacgcgccgtgtcctgctctgcctcttttcctgccaccaaataa
atacacaccaccacgcccagaaataaaaaagaaatcgtgagaggataaaaaaaaaatccg
cgaggggagaaaaaagggattccacccgccaccaaccctagccaaatccctccagtccaa
tcaccatgatgnnnnnnnnnnnnnnnnnnnnnnnnnnnnnnnnnnnnnnnnnnnnnnnnn
nnnnnnnnnnnnnnnnnnnnnnnnnnnnnnnnnnnnnnnnnnnnnnnnnnnnnnnnnnnn
nnnnnnnnnnnnnnnnnnnnnnnnnnnnnnnnnnnnnnnnnnnnnnnnnnnnnnnnnnnn
nagctcgcggcggcggcggaggggagcggcggcgccggggggagggaggaggggtacggc
tccgacggggagcgcccgcacaagaagcgaggtgagaagggctggctgggggcgggaggg
ttttgctgaatctctgttttttcttgtccttgaacttagtgtacagcataaagggactaa
tcttttcggcggtttcgtgc
>Pgl_GLEAN_10030874 PgMYB110
tttgtttttagttttctcaatcctttcgtcattgtaggatgctaaaaatactagcgtcta
atgctaagcagcctcgcgcgttagtgttagtccgtcatatacagtgctgaaaaattaaat
tgacagcaccctacgtggtgccgtggtgggcaacttttaggtcaaaagcgagatggatag
ccaactcttggtagtgtgtaatctttaggcatcattggaatttggtttagtctcaaaaat
agtgataccttctttacgttatcaatgtttagctccgagattctattctatctaaatgta
caataaaaactaaaaccgccactagaactccatgcaatttgaacatcctagtggaaaaaa
atggacggcacaagactaactatatatactgtattactgtacaagcaccacactgtttaa
aaaaaatgaattttcgctgaaacgcagctattgctcaagggagacgataagcagcacatc
aatgtgccgtgacggctctaaaataatattagtgcccactttaatcctttccacttttgg
tcgagtgaaaacacattaagaatacttgcgttgactctttggtagtgcgcgctcaatgca
atggtagtgagtaacttttggtgcaaaaaagtggtgtgtgccaaacaatttagcaatttg
taatctttaaccaaagttggtttgaaaaacctcgtcctccatttgaagtaaaaggataag
cgaagtcatattagtctatctggcatatctaaaattaactttgttgttggagtataaatg
aatcgttcatctctctctatcagcttaaattagttggtactggtacatgtaactcaatat
ttgtatcgagaaacaactgggtcgcttatagtagtgcataatttttaagtaaaaagtaag
atacttgtgacaagcatgacacgtaacatatataagaattaaaagaaaaacttgtgttga
ttctttagtagtgcttaacttccagccaaaatgtgacacagatatggaatagtttagcca
cgtgtggtaattagcccaaattagtatgtggcgcaatgttatgtagactaattcagaaat
tgaaagcatataaatgctgggtagactaatttggaaattgaaatcatgccctaggattct
ttgaaacgttgttatcattggcaagaccatcacaaacattctgcaaaaatactaagcttc
acgaatacataaataatacatttttgttaaaaatttgtattgttcatttgaagtgaaaat
gataagaaaattcatattgttttgtcgtaacggctttacaattaaattaattttagccta
gatccttaatagttctggttgagtgataacgtatccagaggaaaacccacgtcaattgtc
aatcctttggtagtgcataattttttttgctaaagccatacacataccaaactaatctct
gtactctttaggatggtgtcattcttatccaacactaggatgatgcataaataaatagat
taatgattccattgcacaaatccatcatataaccatcaaaagaattaaaattatgccgtg
aggcccttcactttttttactgttagtaataagaccatacaagatacggaatgtgatggt
ataaaacgtataataatagtctaaaaacctagtattatctaagaaatgtattcattttaa
gttaaatgttaaaccatgtcaccttagatatgctaaccttgaccattgttagttgcagcc
aacatatttcgagaaaaacatttgtaaaataattttctcaaaacaacatgaataagatcg
aaatttgaaactgggatgaaaacccagcgcttgaaggaccattatgctaaaaaaaataac
ggggggaggaggagagagaggatggacaaaagaaaaaaaaaccgtgtccgataaataatc
agccctgtctctgttcaccccctccgacgcctcccaataaaaacgccaccgcccccactc
gccggagcccggccgccggg
>Pgl_GLEAN_10007629 PgMYB129
ttgcttaaatttggggttattttgattttttttgggatatttcgttagtttttttcattt
tgttgaattttttagcatacttcaaatttgaactgcaggtgcatgaagtaatgaaatttc
ttaattcaaaaaatgatattcattatatttggtgtattttgaggccatatctaggaagcc
atatgaaatttcgaacatcttttttccgtaacatgacgaacaacgagcaggaaaagtgtt
tgtaaattatataaaatccaaacgaagtccaaaaatcatgaaacttgtctgggtgtcatg
ttatggcgtgtagagggtgtatgcaagaattgagaagatttcgagcaagttgggacgtcg
gatgcctcaaacgcagacatctccgcacatgatatcactcggggaagccaacctcttccc
tgagtgcctcaccctagcactcggggaagccaacctcttccccgagtgcctcatcctagc
actcggggaagagacgcttccccgagtgccaggaaaacagctctcggggaaggcctgggc
cggcccatttattcctgccggcccaattattccagccggcccaaccctaatagtataaaa
ccgccccccccccgccgcagccccnnnnnnnnnnnnnnnnnnnnnnnnnnnnnnnnnnnn
nnnnnnnnnnnnnnnnnnnnnnnnnnnnnnnnnnnnnnnnnnnnnnnnnnnnnnnnnnnn
nnnnnnnnnnnnnnnnnnnnnnnnnnnnnnnnnnnnnnnnnnnnnnnnnnnnnnnnnnnn
nnnnnnnnnnnnnnnnnnnnnnnnnnnnnnnnnnnnnnnnnnnnnnnnnnnnnnnnnnnn
nnnnnnnnnnnnnnnnnnnnnnnnnnnnnnnnnnnnnnnnnnnnnnnnnnnnnnnnnnnn
nnnnnnnnnnnnnnnnnnnnnnnnnnnnnnnnnnnnnnnnnnnnnnnnnnnnnnnnnnnn
nncggcgggcgggcgggcggcggccggagcgggggctcttttacatttttttttaaaaaa
tccacaaatcttccccgagtgcagaggcccctctcggtgaagccttccccgagtgtgcag
ttgttggcactcggggaaggcggcttccccgtgagcctcttccccggaccctattccccg
agagttgcactcggggaagccttccccgagtgcaactgatccttccccgagtgcagttgg
cactcggggaagaacctgcctgccgtagtgacatataccactaacgcaaaactgaattct
tttttttctttccaaacaaaaaattgcaaaattcagatgattttgcatcttcttaaaaaa
ataaattaacagtgatatagtataagagacataagagcaacaagcagctaaataatccta
attgctaacccagcaacctatacatacttgctatcagatcatagtgattattagcagtaa
ttaatcaaagagattcatgaaacgatgttaaaatattgcttgttagatcagctgttcaaa
tcttgtgcgagagggggccggggccgcgcgaggagactggcgaggcttcgagtagttggc
ggtgtggcttttctcccgcgtagaataatacccgaccgggggagctttctgctatgagac
ctacacactccacgcagagaggccggggaaagagaaagaaacaaagcaacgaactaaagt
ctaaagcagagagagaaagcgagagaggagagagagaaaagagaacatatcatcaaggag
aggaagatcaacaagatgaagagaggaacgtaacagtagtagagagcttctactgtgcac
tcctcgttctgcgtgcgaagcgaaccctattccatgtccttgaatctctgcatccggcag
tccttgtagctgatctgatcagatcgatcgaccagagcgaaaagagagaggatcgattgc
cccaggatccgagatctagagagagagagagagagaaaggtttaagaggggggagagaag
caaggagctgagaggatagc
>Pgl_GLEAN_10015206 PgMYB140
tctcggtttgtgctcctgatgatcggccatcattgaacacaattccccggccaatggccc
gtggaatcatgcacagagcgatctcggttttggagcgacggaaatgcaccagcatgtctc
gcttgaacaggaatgggggggtacatatatcatatcaggaggaattcctaatggatggaa
caagggaactagtggtctgtaggtgtaagtgcatggattccctgaaacaacttcagagaa
gactggttgatccacaaaatggcaacaagcaaacaccaattttctttaaaaaacaccgca
aaatagcaaaacacacaaagcacgatgctactggcttggaccactcttaccagttgcttt
tcaaacaaatgcctgccgaagcttttatttttgcaaggcctcagaggatctggacacgat
tcattgtatttgatttaccagggcaatactgatttctgaggtatatttgtgacttatgat
aactagaacaaatggaatcatcaatcatggcaaagattaactggaccattcccttaaata
gaaaagccgaactacagataaatcaactggaagggatgcttacaggctgaaaaatacagg
acctcccaagttatataaagagcactccatataagataatggtaatcgccacctattcag
ctattccagatgacaggacttcatggcagttagaggcatcaaacattgaacctgagactg
ttcagttgaagtatggaagacgaataaacaagactaactatatcggtttggataggcgtt
cttatacaaagctaaagcaacaaagagcagtgaaataaaggaactaaccgtcatttttaa
gcccctactttctgcgtcttatgcacaacaggcagaaaccaaactcagaagactcctcca
tacagatgcacagcccattagattcgcctatccacttttccttttccctgatagccgaac
aagtacaaaacttacatgaggagacaaaagggaaccatatgcttattccaatattccatg
ctttgctttttgcgcagtcccaaggaaggcatcactaatggaatgagttcctttcacttt
atttatatgcaaaaactttagcgaattcttcttctggatgcatctggtcaaaaagaaatt
taaactttgctctagtatgaatgataaaaaaaaattctctaatcgactatataccatgct
tgtacacactgaatgcgtacatttggcacagcatctgtggttgcaaaacatacagaatcc
taactgatgccgactatgcagtggagagcggaattaattctgaaagtgtaagataatagt
ccaagaatatagtagccctacaagctcaaagacagcattacaaactacatatcaaaagtt
cttagtgagaacaaggttcccattttatctgcaagaagaataaacttaacaatatgtgtg
cctgtaacccccctccctccctttgtgccagttaaagcaatatcagccatatttgttagt
gttggattggaatcagaatgcaaatgtgtttgcggaattggcaaataaaaagataggttc
gcatagggtccacaggtaccttaaggaataaggataatatctctatacctcttttcagtt
gctgcgaagattgggtcaggcttgagtgtttgttccaacgattcgaaattctcttctcac
ttgccttccttataaaaccagtctctgcataacatcttggcatgagtagtcctagtttgt
tagagcaaactcccaaagaatataactccactgtgcgataaaacccccaaagttcaccaa
taacaaaggtctatagactgcaagagtcagttcctatcaggattgtggagcctgcaacca
tatatcagtacaaaatagaattgacgaggtatgagatgtgtgatgtttgtgttatttggt
ttgctcaaacaaaaggaaaaaaaggaggaagtttctccttgtaggtcctaacctttaagg
ctgcaatatcttcatgccag
>Pgl_GLEAN_10038507 PgMYB133
ttgtggcacctggtttgcaagattaacagcaagttggcaaacatcaattttaagatggca
acgccatgattacaaaatacagtagcagagcaaaacatgactgatgacagcattgacaca
taccaacaccaagccagaaatgggctggctagaccacaaaaaactttaccgcaaatggtt
tgtggtaggcctttttgggaacttacctctcctgcttcccgtcagggttaaaaaagaagc
aaattcgggtgatggagagttcaggtatggataaatttcagaaatataccgaaagagatg
ggaaaagaagttggagaaatgaagaagggctcctgcacagcaccccattattaacctcct
cctgtcctcccagaccaaaagcaagacagccaaccaacaggcccaggatggagcacacca
agaaagggagtagcgtagttgccgggcaccaatgatttgcaacaagagggataggattta
ggcaactggtacctaggtctcagagagagagagagagagagagagagagagagagagaga
ttgccagattgggtcttggataggggtcgagactcgagagagtgggggaacggcggagtg
aggccgcttccagattccgaatctcctacaatccgtgctcctaccttcgcggtgtttcag
gtgaggctaagggttcaaagatccttcattttttatctgcattccatatctccattgcct
ttttggcatcagtcaagctgtgtaggagtacggtttcccccctaaatttaacagtttatt
ttgtgctggccttaatgcttttggagcgcaaatactccccattcttgagttgcctttctt
ctatctttggttggtgcgcttcattatgccctttgtcgaattctccggtgcttgtcacct
ttgagctcgctgtttgattccttttcggaagaacggatttgagtctccttgtcgtgtgta
attactaatttcctgggactgttccgaattccaacaactgtatgctaggttttctcccct
tgaccttctgatgctggacctggacagagtatgggcctattcctttattggttttgtcga
aattgagattcatttggatacttggttcgcagaagatattctgaccgtcgttatgcatca
tttttggagtttgcctttttcagaacgaaatagtttccataaactgtgtggatctcgtac
caagctttttctagtagatgtgcttctttgcatttatatgtcaaaagaaatactccctct
gtcctaaaatataaggcattctaggatttttacgacagattaaagaggtggagaaatgtc
acatatacccttagttaatgataattaaaggtaatgataattaaaggtaagttttcgagt
taacaagtgcaatatttggcaaggctataattgagttgattgagtacttaccaaaaactc
ctaggatgccttatatttggggacaaattttgaacccttgaatgacttatatttcaggac
ggagggagtatattgttaggtccacgtgttttcctgctaccactgttagcaggtgaagct
aatcatttgttatccaaattgggagttactaaaatttttgaaagaaagggagttactaaa
atatagaaatgaattccatgtatccataaacaagtttcatctgtttgtatttttcttgat
attattgtttatattacaagctacatgcttagttaagcattgaatttgtcacaaggcaac
ccccttaaaaaatttcatgtacatgcctttagtcaattaattgagtaattctatgtgttt
ataatgtgtttataaacaagattcatctttatcgcaaaaatataaacaagcttcatctgc
ttgtaattttcttcatattattgtttatattatgaagtagatgcttatgtaactatagaa
tttgtcacacaacaatctcattacaattaaacatttttatgtacaggcctgttatcaagt
cagtaatcagcagaagcaaa
>Pgl_GLEAN_10003870 PgMYB136
aacatcatgttataagtcaactaacaaaaatctaaaagtgaaactcaatttgcatgccaa
gaaataaaaaaatatataatgtaggtaggttggacaaatagttgacaaagtgaatatgtg
atgaagtaaaatagacttggctcaaaacaagggtgcaattgcttactatgaatgtggatg
aaaaccatatatctatattagtatatggtttcataatatttaacaaataagagaaagcat
aaggtaaactgtttaagctagggccctaatttatctataaaattatactacatataaatc
taaaaaaaatatcctggaaccattaatttaaaaccggaaccaaaatctcaccatagctca
tgaagttcaccggagacggagatccagcacaaatatcctcgcgggatcagaggtcattat
ctcgacatatttccccttagatatatagcagaattcatagaaaagaatatatgtgacaag
ttttgttacaaggccagcggcataaataatcgcagggccgtaaggtcgcaggctcgcagg
ccatgatgcaccgcatgatccgctcgctttgccctctctgcacctgcatgtcatgatgag
aaaacgaaatagctgctgccgtactgggtctatcgatcgtgctggtgccgatggcgagtt
tccaacattcaccgatcacatcatatgttttaattaagagaaattttagggtgcttcttt
tttatgagctgtccatccgacgaaatgaagtatggaagttgctttggggaggtaggaagt
atcaaattggtgggacccacaccaatatttagttaattttttagatggtgggaatatcaa
aatgtttgatacttctcaatactactcaatacttctcaatacttcccaatactacaaatg
caacgagaaaaaaatcttattaattaaaagtactaaatgtagattaataacaaaattcat
ttcgtaactaataaattcgggagaaaaatgtattgagtctaattagacattgtgatgcta
caataaacatattttaagatggcttagttagagtgaatagattcatacgtgatttctagt
ccatctgtgtaattagttttataattagatcatatttaattcttttaattaatatcggta
aacttgatgtgacattttcgataaatttctccatccaactaaataaggctctcaactcaa
taagtacatacatatatgtacatgatacatgctcttgggagcgtgtcccttgcagcactg
tactagttttcagactcggccaaaaacatgcatcaccatttgtaccatgctgttggcttg
tttctgaaagaatatatacttgttttcttcagtaaagttagatttgtgtccgtctagttt
gaccttgcttatttcaccaattcgcgtcatggatactgggtgccagataggatagtaggc
atgttagtgataagctaatctaggactattgctaactgtacgtgctgcaaaaacgccgga
caggccaggtgagtgtcagaggcagcagcgaggcatgcagatgcaggcggtgtagtactt
gttactactccatagtagtatgcttgttcctcccgttcttcgtgtcctatgctcgcttgg
agtcaacggggctgctccaactccataatcacctggcgcctcctccggcaaacggcgtga
tcgcctctctgaggacgcctgagcacagctcctttgtctccaacctcttgtcccttcctg
cactggcgccgcatgcctcgctctcagtctcacctcgtcgtagttctcccaagaacggat
tgcacgatgcagagaggctatttattgcctaccggccgccgtgtcgccgtgtatcctagt
cctagtcagtcagtcatcaaacacctgccagatgttgtgtgcttttgagagaggcttgta
attagtttctgaagcctgaaaacatcttcctggggtgaagcttgagcgaccattcccttg
ggacgacgatggagagagca
>Pgl_GLEAN_10001215 PgMYB135
ttggaccaggtggtgggatgcaacttaggatgattggaattttttattttttaacccttt
ttaatctaaaatttaaaattaacccctccccaactaaaattccaaaattccaacaagtag
cattttttgtcgcgtcaagcctcctggcgcgactaatacttgagccacgccacatgatgt
ggtgcgactaatgtccacggtggcgttagaaaaagtcgcaatctgacgtggctggtcacg
ccaggcgtggcgtgaccgaatcgatccctactacaccgaagagtttctagtctcatttaa
ctgtgtttacttattctttttaattagcaaatgagctcctaaatttgtgaaactcaaggt
gtatgatctatagggtgcatacgttccatttaactatgtgcactacaaaccatggtgtat
aaaatgagaaatccagttttgaaatagcctaagtgttattaaatcaacacatgaaaaatg
ctaggtctgaaaatagaattaactagtcaacttttagcatactttttgagaaattttaca
ctaagatcttaaatacttgtgggctacaagtgaacttggatgttcataggaaagtttgga
caagggtttggtcaaatataacaaataattcataatttaagggaggcttacagttagaaa
gttgttttgttttacactaagatattaaacaacacaactttccaactttaagcctatctt
aaattatgaattctttgttatatttgaccaaacccttgtctaatctttcctatgaacatc
caaattcacttgtagtccaaaaatatttaagagcttagtgtataccaagtgatctaacca
ggccacttgtttgagctttttaatctcgtgcgactcttctcatgcgagcaaccaaaaata
ttctatccatagcctggttagatgcatacaaacaaccaaccgtgacatcattgtaacatc
attatatccacgtgtccgatgaaaactgtagcaacgcttggttccattgcccaaatagca
tgaattgtcgtctatgagaaacattggaacttggaagccacaggctgagcactataattg
gcacgtcaacacattttttttggttaacttaagatccacacgaccagccacctacctata
ctacttgtcacgaatttggacctcccaatgattgccaagaggagaaaggagcaaactgac
ggaaaaaaaaacagacgtaacttatattaaaataaaacagacatagctcaaatccaaaag
attaatgagaaagccaccaactaatttcgtacgtttcccctacctattcacaaaatcttc
gtttcgaaatcgtacatgaggttttcatgtccttcggcttctccctataccaacaacaac
aagtatagttttactgaaaatcacactatatcgtccagagatgcgctatgaataatcaat
aatacgtacttgtcctacaagaaagaaatataccctagctaccgcgtgccgggtcttgaa
acggatgagaaacgaacaagagcgctttgctcaccagtcaccacacacgacgaagtggac
aggaaatgtggatgaaagggtccgaggacccggcgatgaaaacgaaacgagaggagacga
gcagcgcagcgcagcgagcgggaggagagcgcgcccgcacgccgggactcagccgtgtcc
acggataaaaggaaggcgagacgcaggaagggggaggcgtgccccacaagccgcccaagt
cacaacgcacacgtatatcaccgcgggaatatccgccacgtggacggcccacgctcgccg
accacattagccaatcaccactcaacagtcgagttaacccccctcaccctcgcatcttct
ccacacacggcttccacccccactccggccctccccctccccaccaccactcctcttccg
actcgcgcagccgcgcccgagctccacaagaggcctagctggcgactggaggaggaggcg
gcggcggcggcggcggggcg
>Pgl_GLEAN_10023408 PgMYB145
agtacttttttttataatatcacattaaaagtgtccactttctcttttggatggtcgtat
ttttaaaaaatattttatctaaaaacttatgttagtttcatattattttgaaaatgtgta
catattcttatgatattttaaagtattcttcacaaagtaaaatgctttggaggtgaaata
acatattatgtttgggtattattttaagtgaaagacatgggtacccctaagtcaccaccg
agcggggtctcagccatccccgacaggcgggcccgaccttcaagaagacccgccgttctg
tcaattagccctccctgacctgacgtgtgggcctaaggacatggatacagcttggagtac
atgaaagatagtccagacagtctaaggcagtttggataagccttccatattgtaaccgac
taggatagatgggaactgacttgtagcccatggtcgtcggtcaatataaggcggtctagg
gcgccctcctcaggggcggatgactctccacataattcaaataccaaactagacgtaggg
ttttactctccggaggcccgaaccagtataaatcgctgtgttcctcgtgtctcgccggga
tttccgagttccatccgcgaactaccacctacgctcttaggtcctgatcccccatcaatc
aacctacaaccacttgggtagcccccttgcggatctgctaggtctcacctcctgacatta
agaataaactaaatgtgcacataaaaatcggaccgcttcaatatcttgttgtcgttcatt
ggtgccacgttcacccctagccatatagcgcttgttgccgttcattggtgccaccttcac
acctaggaggctgttcggttggccgtttctcggattatatcggtttgtttcggtttatct
cctctcacataacactattcaatctatcagtcgaacactattcattacatcagccgaaca
acatagagcttgtgtttgttgttgttgtgccttgtgcacacctttctatcatcgtcgatg
tcgatttcgtttggcttatcagtcacctgtcaatatatttctctcgaaacaaatcagtca
atagtacttttctctcaaaataaatcagcactagccaccagttaaacaaacaggttgatg
ttggttagtttgactagaggttgatactgatttattgcgagagaaaaacactattgattg
catgacgttgctggtggttgctgcgagagctttttcgaccacctgaactattgtggcgtg
tcaatgtcattcctccacatcgctagtacttgctacattgccatcctatcgattttgaga
aagataaataaataaaaaactagcatttttaattgttgcttttgctttagaaaatgttga
atcacgtgtgaaatatttatggtatatactttatacaaatagtgatgttattatgttagt
tttgcaaatttggatctgattagtaatttattttagatttattatatgctaatataaaaa
acttaaaattacggagtgctttcccctctatcccacgaaatcggtcgaacggttcggcct
tcggccccgacggcgtctgctgcggtcgtcttcttccccgcgacccttctcccttcgctc
ccccagcgagcgccccggcgtccacactcccctgcccaggctgcagctcgagtccggctg
gggcggcagcaccctcctttcccacgacctctctgttctctctctcggcctcggtcttcg
tttcctgcggcgacgacagggcgagtgcgctgcccgttgttagtcgagcgacgggcgctt
cgccggcgacgaacatccgatagggtatgcctgccttttgacctcccttcctatcatgct
gcgcgaaatcaaacacccaaacccctaacgtatggtatttgtattcggatctgaccatga
ttttactttacctactaaattcaatctttttgcaacagttattgggtgtacatgggtgtc
ctatactgggtccgcccctg
>Pgl_GLEAN_10021771 PgMYB134
tgagatgataagtttttttaaaagtttccagcgcccgatcggcagcgatattttttagct
tcatggccggtgaaagcgcgtggccggagcgatatcttatattagtgcattcgttcgtac
gtgcgtacgtacgtatagagcggtagagaccgtatggtgtacggatagtagtagtatact
agtagtatctctgccatgctagcagcacccacccggccaccacccgttggatacttggat
gagtgcaacgggccagaggccctggctgcgcgcccgcctgctggctctgcctgtcgtgcg
tccggcacacgaacgccacgcgagcgtgaccaccggcggtgatcgatcgatcatcaggtc
ccgatccgtgcctggatcgccacggcacggaacacgcgcgcgacccggcagcgggttacg
ttagtatacgtgtcacgtgcgggtgtgcgggcggaattcccacggcatccgcaaccaaga
ggtagcccagaagcacccccagatcagcacacggaacgcggccgatgccccggcggagga
cggccaggaggcactaccgaccgagtcctcctcctactcagagcgcgtggggcgaaaatc
ctacggcatctccatccaatccaacacacggccacacgccaactccccaaagtcacccgc
ctgtccaaacatgcatcctccgctgagaacactagtgagtggcaaacgacccggaaatca
ccgcgattttttgggcagagaccagacgatccccaggtggagctagcagcttgggatttg
cgaagcagctgagggtgatgatgtggcgcgtggaaagaggcttggaatcgtccgggacgt
tgatactccggcgcggccgcggcgccgcgctgctactaaaatgacgcgatggaggggagg
aaacctgcacgtatttgccatgcttgatgctgatgctaaaacggcaaccgatacgatggt
gccaaatcgtttggctgatgactgatggctggtgctgatttgttctgagagaaaagtact
gttttttaattgctggtggttggtttgttctgagacaaaagtatttgtggctgataaacc
aaacgaactgggcgctaagcgccggccggccggtcatatatctgcacgctaccagcacct
ctccctctagctagtcctgcagcgcaatcttgtgaaattccaagtgctttcaccgtctca
gccccccagcccctgccatgattggcacaccggaaattgctgcggctcatttgcagaatg
cacgagggcttgatatttccgcctgttgtgttatcgtgtagtatgcattatggagcattg
gagctcacatgacagtagcacacagaagcactgcttggttcggtgcttttactgttgagg
tgatattgctagtctagtcacgcagacacttggcatccccacaacaagaaatgtagccgt
gctacgcatgtacgaacctgatatgaaaaaaatgattagatacatttcgttcgctcggca
ctaaaaacaaacgagaattttgttttgacatcatcaccgacgttgatgaatcgttatata
ctagctaggtgcccaaacttaaaatctttcggtagtatcttccctcggctacatcggtca
accataatttagctatgaaccaatcatagtcgcacaataacaaaacaaaaggggattaaa
atcttgcaaacacaaaactgtttcccccttaacacacagattagcccccgtcagtatggt
aatctaatatcgatacgtgtataaatacgcgcggctggtgatccctccccccggggggag
gcagaggcagaggcagcagcaactaccaccagtagtatatctcctcttctccttcctttc
ctgccttttggcctcttctgcggcagtgccgtctgcagtggcctccaaagcatccccatc
caacgaccaatccgcttccaacaacacaccatcaacagcgacaaggcagcagacgaacca
cgagcagcgggagggaggca
>Pgl_GLEAN_10011359 PgMYB127
taagagaagatgaagatttttggagaagactaaacaactgtgtatgggggacagagaatg
aagatgattttgtgtcacaatggaattctatcatgacagattatggactcatgcgaaatg
attggttttccaataggtttgacattcgagcatcatggattccggtatacttcttggaca
tacctctagcagcaatgcttaggaccacatcacgatcggagagtgctaattcttttttta
gccgcttcattcataggaagttgacctttattgagttttggctaaggtttgagacagctt
tagagtgccagcgtcaagaggagttgatagctgataataaaagtcttcacaacactccta
aattgaagacaccatgggccatagagaagcaatgcagtgttatatatacacatgaaattt
tcttagaaattcaggaacaaattgtagttgcaagagaccattgcgttattcaaggtattt
cagagtgtgaagatacaaaatatttcaccatcagcagccactctggaaaagttcgagttg
ttgagatgaacaagtcaaacatgtttggtacgtgctcttgtaaattatatgagtcctatg
gcatcccatgtcgtcatataatacaagtgcttagagctgagaagcaaaatgagctaccat
caatttatattatgaagagatgggagaaaaaatgtaaaaggtcagtttgttcccctgcta
ttaatggttgctattttttttggtaatgtcataatgttgatcagattttttatttcgcag
agaagaattttttgatgatgaaggcaatattctggatgaaaaggctaaagatcctatgga
ggtgctaatgcgaaaaaaaattacagtttcacgcaacaagtttgaagatctaatcgaaat
ggccaagaactctcaagcagggattgattttttgagttctagtttgtcgaacctagtaga
acctctccaaaagattgttcctgcagctacagttaataaacaagtcgagtttgagacttt
ccttggtactgaaattccacaagaagtgcagatacatccaccaactgatgtcgtgtccaa
aggtcgcagcaaaagaattaagaagggtaaggagaagaaggcaccaaaaaaacggaagtg
tggaaaatgcaagcaaatggtggatcatgatgcgcgaaattgcccaaacaatgttcttcc
atgatgctggacaatgttcttttgtaatgtaatgtaatagagtgacctgtgaactaagat
agcctattttgtggattttttcgaaatactatatgcctgtaatgtttgaatacttcaaca
aacttttacaggccgaatactatagtctgaaagcttcaatcttgtatttatgtgttattt
accttttttcttgaatatttacatgcatccagaatattatgctcgattctgctgctgctg
aaatatttacttgaatattttccagaatatttacatgcatccagaatatttacttgaata
tttacataatgaattattggaatgaacagatggtgagacagtgctatgatcatccttact
tacaaagctgctgaaaaagctggagaaattcccagatcagcaacaaggttaatgccatca
tctgacattacaaagaattgaacaggagaagcattcactgatctcacgcctgatggttca
caacccttaacagggcaaccagtagaaaggcaaccagtagcttgtctcaatgacagaaca
aaaatgctttacattatgaaatgacaacaaaattccagtgtaaaactgtcaccacatgga
gtcaatctcattaacaaatgacacaacaaaattccattacattatgaaatgacagatcac
aatggctcatatacaattgttcacatttcgctttcaaagtcagaatcctatacaattgtg
aaataacaaaaatcctatacaattgttcacatttcgccttccaagtcagaatcaaaagac
ccctggtcagaaacaccacg
>Pgl_GLEAN_10014410 PgMYB147
ggttgaagcatacccaagggggtgggtcggttggggtcccacccttggtgttcaatctca
ttcttgtggtactccttttcccactaaaggcccagaagcctcttgatcctcgagtctttc
gagctctgaaggcattgacatgtcaacctcctgctcagagaacactcattcttcttcttt
gcgagcatcccttactgatcgatgactaccccagtcggtcactagctttcatgcttcttg
ggctctctagtctcttgtacccatgttattatccccggtatctgcggaggaccccccgga
cacttccatatttttgaactgaggatcttatgccgcactgaacacgggatcctagggtcc
ttcggacctttcacatcattggggatcttctagatgggttggctctgactagaacatgat
ctttactcgattccccaacaaccgcatctgtgcgttgactaaaaaaatcacgtggaaata
ccctgtgtgagccaacttaccatatattctcccctccccctctttttataacgccgcaac
ttctcgatccatcgcacatgacgcttttgactggttgctccgcccccatgagtgacttcc
accttgtcgaagtcacctcctaagatggggaggaggagcaccctcttctcctcctcccca
ttcccttctctaccgcccttgtcgccattttcgtctctggtgagtgctcggttctcttct
tcgttaaggacctctaccccactcacctactccatctctggcagcttctagaatcgcaat
cgccagccatagtcgcgccaatccatccccactgggtttcgtgaactcgtgatgccccgg
tcccaaccccgacaccgcccatcgcttgtccttcactatgttgaccgacagtggcatctt
cacgtcgcctcaccatccgccgcctctcggaactccctccaggcacataggtactcgaaa
ctctaaaccctaacatcctcggagcgctactcatcactggagcaacatccaagggtcaga
atctgctctccctctttcattttttttgttacttatattttttttgcaacaaattcatgc
gacagtgttaaattggggctgatgcccaatcgtgaggtctcgcgacgtagactttcggta
tatttgaaccatcagtcaattcgaaattctaaaaaagagcaatgaaggactctccccaaa
ctcagaagcataaaaggaaagttcaagccgcggtccaaccatgcagtacagcagtactat
tcatcacctgcttgctgtcaattcaattcagggcaaatccagccgagtcctgatcaggta
gatggtcgcaaaaggatggaaaaaaagctcaagtcccatgtactatgggggcctccagaa
aattggaaggaaatcaagacaaaatcaatgcgagccgtttttaaaaggaagcacccggta
gcggccagctaagcgcgcacgcagccatctcgagagagaaaagggcgccgcggcccggcc
gccgcaagtggaaagcagagagacaggcaggagagagaggacgcgcagccgccagccgca
gcccgcccggcagcgagcagcacagcaaagccagcaagcacccgccccggcgtcgtcatt
agcagtaactcctaatcgctgcctggccccccagccaatcgcgtgatttacttgctttac
taatcgcgcttagcgatttagtctcctcctgctcttccttccccccacctcctcctcctc
cctccccgcctcgccgctccctttctcctccccccaccctgcctgcggcctctgcccgtc
cctgaatccgtggccgctcctgaggcgggcggtgcagcggctgggtccccacgggcgccg
ccggatctgccgcggcgatggaggcgtgattcgggcgggcgggaggcnnnnnnnnnnnnn
nnnnnnnnnnnnnnnnnnnnnnnnnnnntcgggcgggcgggaggcgacgcggggtgctgg
ttttcccggcgtaggggggg
>Pgl_GLEAN_10029589 PgMYB125
gtagtcgtaggagaggccataatgcattgcaaccatctgctgaagcaccccgcaaccatc
ggcgcacccatctgctggacacaggtggattttgaacggaggaagaacaaacctaataaa
ggaacaaaacaccttgtcgctgccgtcaccatcacatcacggacttccgatccagcagga
actctggcagcagcaggaccatggagagaccggagaagagttgaacggcggcagcctagg
tcctcccatgtcgcccgtgagaggcgatgtgggggcgatccgatttagtacgtaaagtgg
cgctagtcgcggacaaagcattcacactcttaaatctgatgaaagagttcaactgggtga
ccatgaaggatgatggatacatgtacaccacaggcaaaagaatgttaacatcgttataac
aaagcacgaattgaattaatgagtaatataattgaaaattcctgtcttctggattggttt
taaattttaatggaaataacgtttaattatcagggcaaactacacaatcaaactagcatc
ctcggtggtcgagctaaatgatcaggtgcctacatatacaggttcgtctggaacgtacac
tcattaggctaccgcacacttgttagcaaagctgttggacgggcgtcaaaggtactatgt
accctttttaatttatctacagtagtcgtatttcctggctttggtcatcattctgatgta
acggaagtgtagcccttgcagccctgtttgctagtatccaaaaattaaaggttctaggta
gaacggcatccaaccatcccgaagctgtcgatatcctttttattagtagctaacaaatgt
tgtgaggtcaccaggaaaaagatttgaaaaggtgccggaaaccaagcgtgtagatatagt
agcaaacaaaaaggcaataaattaataatagtatactctgagaggaggggcggtatctct
aaagatacattgtcattaaatgccaaaaagcctataaatccgattaaacctggagagctt
tacataagtgacagcctcttccacaactctctaaccacatttcccctctagttccagttc
tcattttactttgtttgtgttcctgctgctcccggtcttggatccaccaaattttcgccc
tctctgagagtttgcagattcacgtccgagcttgtggccttttgttagatcctggcagct
tctctggtctgtgctgagtgacggatctcaatgaatcgagggttcccatggagtccgttc
ggctgggatccatcgtactggaacccgaaccagaaccatcagccatgggcatggcatttg
cgggatccatactggaaccaaagaacagttttcagcaacgtaggctggaatgccagggtg
ccgctacctggtgaatttatggggcacccatcttacaactccccacgtcccataggtatt
taaagtgatgctgctcctaagcgttatttttgtttagatattgcatgaagttctgaatat
tacatgtatctgccccaccttttgagtttatatatgtatatataatcatcaaggatcttg
ttagggctttaaggaatcatctgaaatccttgtgtgtaggtcggccaccaaggcctcccc
cgccacaacgaggaataatatctccagacgttcagaattcgaactcatcaggacagcata
gaggccgtgatttggaccggaaggctggtaagcaactgctagtttccggtggcgaccctt
caagtcggcgtggggaaacaccatgtctgcccccaaagaaaagggctggggaattcaaat
ctgcagagttacataggggccagcgtgggaatgggtctcatgataattcaagtaagtcgg
ctgctgaaaagcctttagatccagtacaagaaacacgcgattcgcaccccacgtcggcta
cgaagactgggttaagctcccttgtgccgcctgcagtgtcagcttcagcccccttggaaa
gtcctgatgtcgatgcgtgc
>Pgl_GLEAN_10014494 PgMYB144
gtgtgttttataaccacatatcaatgaccaaggtatgccttgattgaatagggtaacaaa
gactaaccatacgtattaatatttgaagcactaattgggtgaatacacgttgcaggagac
tgaatatgatccatatgtccaagttcagtgccacaaaaaaatgcaaactgagactattct
ttgatgctgctaacctggtgcatgattatatgaggtgaagttaattatatccatctcact
gcacaatgcaattatgcaataacaaacccactgcgaagttgttaatgtgcgcataatatt
attgttggaggaatccaagtcccctgcctttagtgcacttgctctgtgttacatataaca
aatgcaattattccttatcatttgctttttgttcatgatcctcgagcaggccgatggcct
aaagccaggtccagtgtgcatatacaaatttgggcataaagtcaggtgcacaacttgacc
caactccttttcctctgatggcgccattgtatatgtgctaaactgctagtcatgcatagc
atgccaaatttgtcagatgattggcctgtcgtcttttcaatataaggcaagcaatccaga
atgcaaatctagcttatgggacttttgcttatcgtgatgccaaattctagattatctggt
tcgctcgtcgctcattcatgtgctacctactggctactgccgactacctgtttggcatca
cgaagacttttcaaaagcatttattttccataatttgagatgttgttggaacaaactata
gctactactctgggaaagaacaaaatatcctcatatggttaatgtctattttggtgaaga
aaacgaatttaagtcttggtttcacaaccactgaaaattatgagatatagtaataataat
acaccactcccgcccctcttaccacaatactaacactagacgtttagtggcattattttt
ataccaggaatatgaagatatgggctgaactttcgttttttgtcgttgtgaagatgatta
ttttgtcctccatttcaaaataaatggtgtggtttgacttgatatgatcttgaagaaaac
acttaactgctaaattgtaaggaaaatatgataatatatatggaaatactttaaggtggc
tttgaaggttccaatttcatgcagcaaaacctaaaatctaattataaagctaatcaatgg
ttaaaagttctaaaatttgaagttgaaatacatgggtgcctcattgaagaaatggatgaa
aatttcctgctctaacatctgctcaaggattagctgaatcgacatttccttttcaaatac
tgaactgaaaacgtgacataaagttttagtagaagccagcaagctaagcttcaaatactg
aactgaaaaaatgacataaagtttcagtagaagccagcagcaagctaagcgctagtgcag
tactgctaggctaaggcatgagagagggcatcgatccctctgatctggcaaccattgaac
agaaagccaagctgaggttaaaataatgccacatcgcctaaaggcccgatactttcttac
gtctgtcgaataaaactcccgccaatcacttcgctcgtcggccatctgctgccatcgcaa
gccctccagcaatttgcaccttgctttcactttcccacgcccccttgcatcgaactttct
cagcaactcgcctcttagaatattagcagcatcgctaccgttgtgcacatagatcgactt
gctgctgcagcgcgtatagcatacaggaggtttcaatttagaccaatcgtccatgttgtg
acgacagagcctctctttgtgcctctataaatatcacgatcgaactgcctggttcgaagc
aacacagatcatcatcggcagctgagagtggcagctagctagacgttggtcagcttgaag
aagttcggtaggaagcagcgagcgaggtgagaagagaagagaagagaagagaagagaaga
ggagatcaggaggagggatc
>Pgl_GLEAN_10018726 PgMYB130
tttctgctcgtcggaaagccggcaccaactgaaaagggtactattgtggttttgcagcgt
agggggggtgtacggtgttggtcgatgagatcgacgggaaagaacagtgtctccaaactc
caatggtcataaccggtccggtgtgcttaatttcgtggtgtagtagcgacatgcactgtt
gaagtgtgttactgtagacttatctatatatactagtccataggccatgacccatgagct
tgaggccaggccatggagtagttaagcagtcaacttcggggaaggttaaaatggagaaag
tgtcttcccgtgcgtaatggtacgcagatcagcgtgtcggtattggcaaatcagtgcttg
atacggtggcattgtagtgactgctgagcaaaaggatgaaaaagccacagccgggatgat
gtttccaaaaacagaagagaagtagatattgaagaatgaaagacggtattgatatcgttg
atttaggatgttcgttccttccgttcttccaagctgctcatgcaacctctttagttcttt
tggttgtctaactagagatgcaggtagtgatattgactacataattcatctgtaatgcac
gccgtcctaatgagttgggtcgactaatgattaaggtgaatccacgatctattgcttcgc
gtgtaaaattcgtaccatttcacctgcacacagtatacatctgatggtatttaccatgga
ggactttttagatccgtgattgagcagtggttaagcttcaggaccacttttcttggctgg
ttttacaaattgtgaccaaagagttccatgcgttatgaaatttagattcaacatccaaga
tttttaatcccgactttcatttttttgaacgaacaggcataaggcaatgccaatttacta
attgagtaagaagagaattacaccaggctatctcacttttacaaagattgagatttttgt
cgagtacaccgtccgtttctaattccttgccgccgtagattttttatcataacattttga
ccattcgtctcgttctaaggtcgtacgaaatgcgcggccgtctcactctgggacgagcac
caaggtttcaatttcaactcgcccgtttagcttgacaacggaaactttgcactgagctac
ttgctggtcgagttgcaaagggacacatgtaccgtagaggaagactgactacctagtcct
aggtcaaccgcacacgatgacctttcggacctccagcaccaccatcgttcaccattcact
agaggacgcggcacacgccacgccaccccgccggtccacggcagcaccaccgggcggaac
ggaaaacgcgaggggcatgccgcgtgcggcgtcgatctgggctctggcacggaaacccaa
ccaacgaaacgccccgttcccgaggcgccgaccagcgggcccacccgaagcgcgggcccg
aggggcctcgtcgacgcttgtgtgtgtgtggccagcggcgcgcgagcgaaccgccccgaa
gcgtgacgaaacatccacatcgcacgcaacaacaagcgccgcggcccgcccatttcctcc
tcgacacacacctcccccacccaccacaccacaccannnnnnnnnnnnnnnnnnnnnnnn
nnnnnnnnnnnnnnnnnnnnnnnnnnnnnnnnnnnnnnnnnnnnnnnnnnnnnnnnnnnn
nnnnnnnnnnnnnnnnnnnnnnnnnnnnnnnnnnnnnnnnnnnnnnnnnnnnnnnnnnnn
nnnnnnnnnnnnnnnnnnnnnnnnnnnnnnnnnnnnnnnnnnnnnnnnnnnnnnnnnnnn
nnnnnnnnnnnnnnnnnnnnnnnnnnnnnnnnnnnnnnnnnnnnnnnnnnnnnnnnnnnn
nnnnnnnnnnnnnnnnnnnnnnnnnnnnnnnnnnnnnnnnnnnnnnnnnnnnnnnnnnnn
nnnnnnnnnnnnnnnnnnnnnnnnnnnnnnnnnnnnnnnnnnnnnnnnnnnnnnnnnnnn
nnnnnnnnnnnnnnccgccg
>Pgl_GLEAN_10018730 PgMYB131
ttggaaaacgattttttttttgctttgtaaaaatgccccggccggccggtagcagctagc
tagctaccaggaaatgtctcagtagcagcgcagcgaaagaatttcaaaagaccgtgtcct
agtccccatcagtgagttgaagtgaaccgaggaggatggatgcatccatgaatttggatt
ggatgtgatatggatccaacttttctccctccccgcccccctcctttttgcccaagatga
caagaatgtggtccgaagtccacaattcatttcccgtacgtagagaatgctcggccctac
cccgtgttccatcgttttctcgcgtgatgtcaccggtgtaatgttgatgggtaatcgcaa
actgctaccttgacttcgcaagcattccatcttgcaaggttccaatgccaacacaggaaa
ctcttcgttggtttaacgccccggaccgatcgaatatcaacaagaataacaggacatgat
cagtagtaggaaagattttgggcaactctcttgaactattcaaattaatgacgcatcatg
attctatgccaagtcatgtagtatgtgttaattttccgcatacaaatcaaaacacctatc
tagccatataggtataggcattcacaaattctctttggttaggtatgtatatcttctggc
ctgtgtttttcggacgtgaaaattcagtgttgcctatttatcatcgcctttaatttgaca
cgctcttttccattataagacaaatttgttagccatttgaactctatcactcactcacaa
gcagtggcaatgccaatggaatttctccaaggggggtatgtccattcctacatacatatg
ctttcacacatgcttttgacattgaagcgtgctacggtgccagcagagccacttgctgaa
catgcaagtgtaggagttagccaacgcctatcacattcgtttcccattccttggggaaat
ccaggggccccatgagttgaattgacctttgttaagcctttaatctagacacgtctactc
ctgatttataatctagctagtacatacagtataataacatatataacaccatcaagtact
tggaggtacttgaaagtacctttgtgtttgtatttttaaattactaagaaatacattaat
tgattgctgatcctactatatatttttgctaagctacttggtcagttggttccaccaaat
tgttacttcttcatacttcacggcacttcatttgttttaatcgttctattttctggggat
ggaagtctttcatttttttttcaatcattctaaaatctctcaatttataaatgcgagaaa
aaaatataataaagtacatacatagacaatgcattgcttcacggcgttgctaggtttctc
gaattatttttgtcaaacctgctggccacatagacagggactgttattaaatgcacgcgt
tgaacaactgaattaaaacaccgggaaaatatcagtgcagttccattttgtcaaacagga
gaactgttcaccatccagtcatttttaggtagacctagacaatataatgaatagagatag
ctccacaagaaattgcaatcactgtttgaattatactacttggctgtctcatgaacatgg
acagccccagcttttcagaaactgaggcaaccttattattgtacttttttttttgctcag
tgctgctctttttgagagctgagtgagcatgtttgactggaataggtcagaaaactcagc
cttctccctgccttcttccttcttccttctccttcacattctatctgccatatatagtac
agattgtgcacggtaggcagcaagcaggtacttaaatatatgctacgaggtgttgttcgt
catccttcagccaaacgctcaacatatatatatctatatatgagaagctagaacctgaga
caagctagcagcttgctgggagtaatattaatagatcgaggtgaagaaggcgctgcaggc
gggagagaagcatagggaga
>Pgl_GLEAN_10009674 PgMYB142
nnnnnnnnnnnnnnnnnnnnnnnnnnnnnnnnnnnnnnnnnnnnnnnnnnnnnnnnnnnn
nnnnnnnnnnnnnnnnnnnnnnnnnnnnnnnnnnnnnnnnnnnnnnnnnnnnnnnnnnnn
nnnnnnnnnnnnnnnnnnnnnnnnnnnnnnnnnnnnnnnnnnnnnnnnnnnnnnnnnnnn
nnnnnnnnnnnnnnnnnnnnnnnnnnnnnnnnnnnnnnnnnnnnnnnnnnnnnnnnnnnn
nnnnnnnnnnnnnnnnnnnnnnnnnnnnnnnnnnnnnnnnnnnnnnnnnnnnnnnnnnnn
nnnnnnnnnnnnnnnnnnnnnnnnnnnnnnnnnnnnnnnnnnnnnnnnnnnnnnnnnnnn
nnnnnnnnnnnnnnnnnnnnnnnnnnnnnnnnnnnnnnnnnnnnnnnnnnnnnnnnnnnn
nnnnnnnnnnnnnnnnnnnnnnnnnnnnnnnnnnnnnnnnnnnnnnnnnnnnnnnnnnnn
nnnnnnnnnnnnnnnnnnnnnnnnnnnnnnnnnnnnnnnnnnnnnnnnnnnnnnnnnnnn
nnnnncgccgcacgagccctctccccaaccccccgattcgctcgtctctcgccgtccggt
ccggtgcagtccgtgccgtctcgatcgcccgacgcagcacgcaggcaagcccgtgtcagg
cgcgatcgggctcgccggggcgatcccgaccggagttgtgggattccggccggccggatg
gaacagtagtggaggccggaggggttacttagggtttttgatcgcgatatgggacgcggg
gcttaattaagctccgtgcgtgcgtgtttggtggggagcagtttcggtgcacgtgcttat
ggattgtgatagtgtgaatgtgtgattgccgtacagaaaacggcgtgagtaagacctggt
ggggtaggatgactgggggcgtcatttcagcgcaattattaggtaggcactgtgaatctt
tgatagctgctgcaatcatccgccatatcgggtactaccctcttggaacaacttgcttgc
cccaaggatttagcctttgatctagcaatcacgcccttgtagagctcaagatgtgcttgt
cctgtgaagtgattgcacatgcatattggaattttattccttgttctgtatttctaaggt
cttacaaattgtttgtacatatactataatattactcccccaattcaaattgcaggtcgt
tttggttttcctagtttcataggtgtttgtatgcatgtaggcatacactacgtttaggtg
catagcaaaaactatgcacctagaaaagtcaaaacgacctacaatttgggacggatcata
ataacggatttcacccttaatttggtgtgaaaacgtcagtgcaccattatggcatcatga
tcacaatgggattgtgcatgtgggtggtgccatgtgaaaaaagatgatagtttcttattt
ctcaaaagaaaatattatagtttctagctttgaagaaagtgctgttatctgcattgatca
aattatgccttgcctgtgaccaatcaccaatggcattgttttctacttctcttaattccg
attttatggtaatataccatgtatatcagagtgggcaattttcatattttattttgttta
aagaaaaactgaaaaggggagctgaaggagtgttctattgttatattgctgactacccat
gtgaaagagcttgccattttgtgttgctaattcaattcatcattgtaccacttcttgtta
tctggatattttgaccacatgtcactactcactagttcaattgtggattataagctatgt
ttgttgctattaccttattttcaaatgacctctcactattttacccttatttaattaaac
ttctcctttttctgtctgcagagaaatggactaatgcttttagtgaggtgaaagttacca
aaagcatgttatgggaaagaaacatctaaatgaggaattttaatctaaggcagtctcaga
acagcagagttttgggagca
>Pgl_GLEAN_10021337 PgMYB128
ctagtctacttttcataggtgtcgattcatccgacagtcttcttcgcagagtcttcaccc
gcagtatttatccggtgcaacaaaaaccccaccatcggttcattcgacgtacctgttgac
tgaaccttcacttcagcataccatatccttcgacgcttgcatcgttggttcatccaacaa
tgtccttttcttctcttttcattgcttttgaacttgccaccacttagagttatcttacca
cctttagagccttataatatatactctggatttttgctatgattaacagtggtatgttag
ctttgattgaggtttcatccatgggacctataatgcgtacaaagacatgctcaaccacaa
tggttagtaccattgatcatgttgtcacgaatcaccaaaatcatacttgaacaaatgacg
gcttgttggtcatgttctttacatggtaacaatgacaataaattgtggaataatttgagt
cacataatattttcagggatgaagcgaatatgattgtcaacattgttgtagatctagagc
taggctgagcaactcttgtggccactatgcaccctcgacatctaaatgccaacacccatc
ggcttaccgcatggggaagcacaagcatgtcattcttgatcgccttatacgaagggactt
ttaggcttttgatttgagttctgtgcaatactagaaattaatggtgtagatttattcttt
ctcctctccccacctacatgcttgaaccctagcacttctagttgatgctgccacaccata
ctggtctgcaccgccactccaccttatcgagcccaccatttcattgtgcaagaatcacct
tgcatcggcgagcacctattatggttgtgttggctacttgaacattgtatctgttgggtt
atggagagatggtcgtggtggttgttgaattaccgagggtggtaggtggtgggtgagaca
acacgacatcagaggaactatctgctcaatagtggtggaggatgcttagatagagcaaga
gagagagagagtgtgtgtgtgtggggggctctctttagcatagtaagggatggtcgtgat
ggtacactatagctccaacagtggtggtgctgctaaagcaaaggagggtaatggaggagg
caactaatggaggatttgagattttagagggggcactaagggcttgagtgccccaatgag
aacatgcatgaaccccacccccactctcattcctgcctatttttttcagcaccatggctg
aagaatgggggctccaaggttgaagatgacttgcctccatctattgggctagtttggaag
aaggaaatggctgtggagtagcttataacacaccatgatcaaatgtaataatgcaattgt
ggtaaatctgatgaagcccaacccaattcaacgccaacttggtactattccttattctag
catcgtaattcttactagctagctagatatctactttcctcatccctcgttcctgctcgt
ggattgccaattttgcgactggtcgatgtcctgttgttgccatgatcatgcggaggctag
agtgggtagcgccaatcaaatatatcgattctctacaataattaatgcccctaaataatc
atatctatgatatgtcacatacatacggcgatagatagaggctatcatgctacaatgttt
ttaagaaaacataggatattggtttgacaaaggccgccatgactgcaactaaactacttt
gggttatgtgccaatttttttggatacattgaaatatgattatatatgtcttgatatctt
tgaccttacgatatattaaacaaccactatttgactttatatcaaagtcgggtctctaat
taattgaaatcgggacaaaaagatttgccacatgacctataaatacctacctttgtgctt
gccattcttcacatcccaaaaacatattcatagttcatattaggtactaaaaattgttgt
ggaacacaacacttgcccct
>Pgl_GLEAN_10037679 PgMYB149
gaatttcgtgacttcagttggttggttttttaaaagaaaagaaaactgaaaaccgtgtga
gctcaatattctgtatcttattcagtttggttcaaacattttgagtaaaacggaatttcg
ttggttggtattttaaaaggaaagaaaactgaaaaccgtgtgagctcacctccaacctct
gagatgcgttgcaaatgggtctgcgatttgaccggcgcatgccacggatgagcacacctg
tcgtagcggccggccagccggtcgctctagctcgcattcgcatgcatgtcgtacgtacgt
gcacgcatcttgcatcgggaccatagtagtcctgtccctgttcagcttcttcaagtgttt
gtttgaaaggtttatgtgcgcctttaatctggatctggctgttccttttgccatctgttc
tcttgcgtcctcctgccacgacgtgatcagaaaaattaaattccctctgaaacttacgtg
ctcgatcagtcggatccttctccttggacctgcatgcttaatggtcgatctgccctcctg
ctgcattctgaatttctgatccacgggttaatgtacatgctcgctaactttaagtaccaa
aggattctgtcagagatcaccgagagataattgtctgatactagaatttacgcaaatcat
caatcattcaatgtatgcgtgcagcaggaccttttttatgggggttaaggtgatacgggc
agctagtcacctcctgatcccatcaaccgtcatcatgctgctcttgatactaccatcatg
tgacaattttgcttcaagctagaaaacatctttaattattatgcatatggttcgtagcct
tttggtgttcccaagacaaaaaaaagagagaaatctgcgattagctttttcttgcatcat
agaggctaaagttccttttccgatctaaattcaaagcccaaatccttgaagccacgaact
gaacaggctactacaatcacctttatccttcagagagagagagagagagagagagagaga
gagagagagagagagagagagagagagtacagggagctagcaagcattcggaatttccac
agccatgcccttgcaaatatgcaataatgcacacacgacgacgcactcaactcataccat
gtcgtacacacgagacggccggcgcacaggatggaccgagcttgttttgattggacacat
gctttatatcctgttgatactcaactcctatatactcctagctcaccgttgattgatctt
gtttttctgatccagtaagccgttttgcttgcatgcatgttgcagtcaggtgtgccatca
tgcatgggtttatcactttcagttgctggcctgaaacagttagcagatgctaagcaatgc
aaagcttttgatttgctcaacagaaacgatcgatggagcgagggccgatcgagcagcgag
aacagtgcaccgaaatgaatggattcaagttgctggtgtctgtcagcaggtagcatggat
cggaggaggatgtggagttggacaagccaggtgcatgtcagtggccatcctggcgggaag
cttggcatgctctgctgccgcctgtcttcatctccgctcgggtcaacagctctgctccaa
tctcataattatcccctcctacggcaggcatatgctctgaccgcatctgaaacaccccct
ttgtctccaaccttttgtctcttgcccgccgctgcccctgcaacgcactcctcttcggct
ctccctctctccaccctgcaatctgccctactctctctcctctctctagtggctaatatt
agagaggagaggacgcaggtgttgccctgctagtgctagcatatgagctttctagcctgg
ctgatggatggtcattcatgtgcacaaacatgcatgtgaagtggctggctatctaaccag
atatatagctgttggtagccagttcttgctggtcggccagtttggtgtagtagttggagg
gagctagctgagagatgacc
>Pgl_GLEAN_10031693 PgMYB155
gttgctacttcggagctctctactcatttattgctctctctcatcaattacaaagaccct
cctatatatagggatgggggtagatgtcgattttcccccaagcccctagtggttattttc
ttccgagcccctagtggacgcggtatttacaagaaactcctcgagcccacacaaaggccc
actaacccttacatgggctgggccactcccccaacagacacttctgaccatcccgggtcc
tggagtatatcaaaaacagaaacgcgaaagggtttaaacctttattaaaaaaaagaaagg
gtttatctacctttttcgtcgcgatcggtcccaacgagaccagcgacgacgccctgccag
aattcattagtgcacaggacggttggcgttggccgctgaacagtaatcactggtggtggt
agtagcccaccagtatagtagctgtagctccctcctctcctaccgtcgagctgtaccata
tgtctgttatctcacgtcgccttcagcgctggtgtggtagcactccgtagtatctatctc
tcacacgctcagtcattcatcgtgtgccggccggccacacggcctttgagccagcggagt
tgtgatgccgaagccaaccaacggaacagttgacggggggcatggcatttaactcgctga
acagttgccgggagcagcctgccccccccccccccccaaccggcggcccgcggccacagt
gtcgtcgctgttctgcccgccaacccgcgctctcgtaacgccgacaggtgaaaacgactc
gggggatcaatcgatcgatcgatcgatctcactcgagagtccgtgcacacggataacctc
tccgcccagcgtagtactactgtacgcgtgatgcattggtagtatcggctttatccgata
ccgtggcctgagatcgaacgggcggccccgggggcccccaaccacgccgccaatcgtgtc
cacccgacccgaccgagccgagctacgcgagcagttcccaacgggggcatgctcgttttg
acacggggggctacgctggctgggtggggcccggcctaggatagtttacgcgatccgcgc
ccaccaacgctaccaaactccgcaacctactcggcctaaactgccgcggcgaactaccta
atcaggggtttagattattggctcgggatggatggagtggaggattagagaaaacgcggg
agggctaggcctaggaagaggaggaggagcacagctcatggggtagctagccaatcggtg
gcggttgctccaccagaatttggaaacaagtaccaaacggattcccccctactcatctca
tcggctttcttttttctataatcatggacctggcccaacggaattatggctttccggtac
tgctagctgtgctgcttgctgctggtgctgggttagctaaccaccaagaggaaaaaatag
ctttccccggggaaaaaaatggtctcgacttctacttccagcggtgctagtatacaactg
ttaagaggagttgcgtgactagcaaaatctgcaccgagaatgaacatcgaaaaagttggg
gtgaatctagagcgacccccgattttggagtgaattttgtttgcttctcgaatagtatta
accacggccggtcggcctatcagtcgcagccacgcagcagggcattcgactccgactcgc
acccgcccgcgcgcgggcgcggtcaaatgccgcgcatcttgtagggtccagtcaatggaa
ggagaaatgcggaaataaaaaagaaaaaaaaaatccacgctctctctcttgtccctggcc
tggctcccatatatacggcgcgctgggcgctggctgctcgatctcccccctgtcacaacc
aaagccaacgttcagactcggctcgagctccgagcagaggcgtccgtcctgcaagaaaca
cctgcggcggcgtggcgcaagaacccaacgaggcccaggaaggagaagaggagagcagag
gcagctaggcggcggcgatc
>Pgl_GLEAN_10007906 PgMYB160
atgatgagttaatgttgcgtgacagtaggtagtttgggagaatctatagtggtattttgg
tctttggtcagttttaacaagttttagcaactcttgaatggttatgaccgaatcactttt
caacttctagctaaaagttaacaacgttttggttggatccgtttgtatctaaagttgctg
agctaattaaaaagaactcgatgcattcggattttgcaaaggacgtaagacggtagaggt
cacaacatggtggtgtgccgctctaacttgagtgttcatattatagaagcaattcattaa
tggtcgtaactctatttctctcaacatacaagcatttcacgtcatgactcactatacgtc
atgtcaccatctactgtacgccatatcatcttccaccagaccatctatttatgtctttca
ccgattttctgtgactaataacatatatttgtgagtaacataacacaaaattcttgcagt
tgaaatacatgtgatcaatcattttcaaatggttcactcttaacaaaataaaataacatg
cttccctatatgattttgtttacgaatgaatgttgtcatgtgatcactttaatgtttcat
cttcacattttaccttcaaatcttgcttcaacacgatgtatcactaagactagtctcaat
gcaaatatcatagatacaattacctagactgaaaactaggtaactgtgccagtagagttt
cattgggatgaaactcttcccacatctcatgaaattctcacattctcttttcgccatatc
aacatatttaatgttatgaaattctctatgaaactccactgagactgacctaatatgact
aaacggctaaacccaacaagtcaccaggatatttcaatatttcattctttccttgaacga
aaaagaaaaacaagagctacgattatccatttcctttcaaaggtgaaacggcacatggat
gacagacccaccactttccatttgcgggaaaatcacaagacgtcccttctgggccttatc
cagaattcacctccaagaatggtagcccgttgccatttttttcgtggagtcctcgtcaga
atgccgcatcccccgcgtcctcgcgctcgcgcgagcgaatctagggcatgacacgtggcg
cgctcatccacgtgcttgggtcccaccccggctcttttactaccgggcccaccttttgac
cctaatcccaattaaggagaagactaaggactagtacgccacctacaacgtcgcagtctc
ccgttgggaaattaacactttgacccacagcagttttgtaaatcacgttcactggataat
cgttcatcttgattttttttcttgctaaaaacagtaagaaacgagtaaattctgcgcagg
cggtggggcccgtgggtcaggaaggagtaactgctgctccatcgcccacaataaaagtta
taaaccctaggggttcttgcgtcaggggaaatctctgccgttggcgtccagatctcacgg
tggctgcgccgcggaggctcgtgcttatcactccgccgtctccttcctcgggctcgcttc
cgcactgctgcttactgtgtgcgctccctctctctcctcccccatccccttccctgagcg
gctcgaagcttctggcgcccggaatggcggaatcgcctgccgatcggagtccaatccgag
cctgaacgccctcgaatcgttgcttcccgtcccgatcttccagaatcccgaagaaatcgg
tgttggaatggcggcctgcgcatcgatcgggctggtgccgctggattccatggtgctttg
gcctgggggatcgggggagcttcgtctcctgtgatcgagcccttcttctcgtgctagttg
gtgcggggttggatcgtgcagagccgcctttacgccgcgacgaggtaactgggtgctgcg
tcggtacgagctttccattttggggtttcgccgcgcttatcctctcattctgtgtgattt
gtgctcctagggtccgtcgg
>Pgl_GLEAN_10023913 PgMYB169
ataaacgtctctcaaaaagatccaaggttcaaacatcagtaagtctctattattgacagt
ataagaactagaactgagggatttgcctaatatcaagtaataaacaccatttaaaattta
taatcaggacacctgagacacaaaagtatatttctcctactccgtctggtcaaaattaaa
tatattataatgtgagcagttaaactatttcaatgccacccacaaaactaaagtataaag
gacactttattagatgttagaacatcaaatatgttgcactaaaaatcggtagcttatgtc
gtctagagtctgtgacactgtttaaacacaattgctaatgctttgatcgatatttataaa
tgaagaattactattattgacagtaaactagaactgagggatttacctaatatcaagtaa
taaacaccatttaaaatttataatcaggacacctgagacacacaagtatatttctcctac
tccgtctggtcaaaattaaatatattttaaatgtgagcagttaaactatttcaataccaa
ccacaaaactaaagtataaaggacactttattagatgttagaatatcaaatatgttgcac
taaaaatcggtagcatatgtcgtctagagtctgtgacactgtttaaacacaatgctttga
tcgatatttaataaatgaagaattacataacaaacattgaaatggtccacataatttctt
gaaattcaaaggccaaagattaaagagcaaagaacaaatgcaattatctcttccaaggtc
ctggcagcagacagggaaatacctattcgttggtccaggtacagcccatgctttagcaca
tattcttcttctgaccatctcatgtgtactgtccagaccaagagaacttcaggagtacaa
aagatttgatagattttgatttgattcttgaatcagtatcattgttgagcttcctgtaat
caccttccaggaataagcttatattaagtatatatctcaatcacagtgtaagtatgtcat
aatcaataaccaaatagtttgcacaaatgctgtatcaaaatcatagtccgttttattcaa
ccaaagctcctatgcctggcaaaagattatttgctcagtagcctcaattttacttggtgt
agttcactaggctaccagcagccaaacgtatatgcaggtccatggaatatatttcattcc
aacacgagagaggcaagcgcaatataaattcttcccggtggtgcaaagccatcggtttta
ccatccagttgctaagatccttttgcagttcttggggcatgcagatgcattgccatggct
tctcagtctaaagaactgcttgccttacctacaggatcagtcatatctggaagtttgaaa
gaaaatggggtcgccattttacctatagacaagaagtgagccaatctcaactggtttggg
gtatggagtgtggacacccaaccatccaggtttaagtcctcttaactataatttggctat
taattttctacttcttaatggaatacacagttcctactaggtcgtatctcccttgatgtt
taacttaccatgcactgtgatctaaactcgtatgcattgtcagtgtcagatccttttgtc
agccaggcacattgtacctgaagaatcctcattcgaaaaggaagctcttttatgttcata
ctagaagatgtcgtgattctccctttccatcacgcccccgctcacacaactcttacagtg
ggtcctgagttcaaagcatgagaatcttattcgcctgtcaagtttcgccccctagtgcaa
gcattgcagcatgacggcagtatgagcaattcgtgcttgccaagtgcctataaatagtag
ccaccctagcaacacagagatcaaaacatcagagcattggacgagctaaaagcttcagcc
aagctacctaactcctgagtgtctagctacacataaaacatcagcactagtttggtttcg
aagagaggtctaatccaaag
>Pgl_GLEAN_10036207 PgMYB190
ccaagcctttccaagcaccctttgtgttctttagtgatccatctaatcaagcctatcctt
tagtgcgttcttttaaagctttcttatgattggtgctttgttcttagtatgcttgtttgt
ttcctttgtgtatgtttgtgcccgatgattgatgcgcttagagtgaatgtcgttcgagaa
gcttggaagagcttgaagttgaagatattctgagcaacgacattactttggttaaaggca
agtgtgtccttgatcttttgtcctaagaactatgtttaatcactcattgcattgcttgca
ttaattttgatgggttcctattaaggattacctagtctttatgatcattccttgttaacc
tgggttttacatttatgttgggtaactatgcttagttgacaagacatatggctctgtctt
ggcttattaattagtgaactaggtgttaggtatgctttacctgataagggttgggggctg
gcgggtagtggcgtatggacctgctcgggcgtaggtgtgggcttggctaagacacggtac
tcgtccgggagctttatacgttgcactgaccaggtaacctagcgggcagccttcatctgg
ggatctttgtaacggcctcgtagcgtccctatgcaatcacacctcggtagtgtggtatga
tgcatgcgcagcatcgcatggttgggtttaaagttcttcgggacttttacgcgacttgtg
ggtaaagatgtacaacctctgcagagtgtaaaactaatcgattagccgtgcccacggtca
cgggcggcctggaccctcacatgataattgaacttgaagatggacttaaatcgctctctc
tctctctctctctctggttatgcttgccatgtgcttatggtgtatttcttaccttatgct
taattgtgggatggtatatacttatactttattagtaatcaggtgctaataaaacttgac
caactaaaattgcttaaatgcttatagcccagtccactataaagcctttgcattcattct
ttttcccacacttgctgagtacgacaagtgctcacccttgctataaacattgttgctcag
aaaaaggaagctactatgaagtcatgtgaagatgttgctggtgctaggcgtacgcaaccc
ccagtcgattgcctgtgatgtttggagccttcgtttccaggattcagcgtaaatctctga
taatctttctttttcttacgtgatactgtttctgtattcacttttatgtcactatatgca
tgaaacttgatcctgacatgcatataggtatgcacttggtttccttcggaaaatcgagtg
tgacatacttttgggaaacgaagctcggtcgatcgggaatttccgtaactgtcttcaccc
ctattcggtaccttatattgcgtctgaattgcatttgctaagtataaaggtaaagaccac
tttattaccccttccgtggatacaagaagtcgtttagcattagtgataataaataaggtc
attaactagaaataggtaacaaaatatgaagtttcattaagttgttgtgttgaagggaac
aagtcttgtctagttacactatacagtttctctttctgagagatgtactccctccggttt
ggtaaaagaagacgttttggacaagatttgagtcaaacattgggaatataaaccatgaat
aacttttaagttgttgagtttggaaatgtgaaaactacatgatgagtagatttgtcttgt
aaaatattttcataaaagtatgcatatgttagtttttaataattatttttgtaaaaatag
gaagtcaaagttgcactttggagaccgtgtcgctgtcctaaatgtcttcctttatcagac
cggagggagtaggtagataacaaaactacagctcaatctctctcttcttcccaaccaaca
tagcttctgaaatccccatggatttcagttgcttttagccccatacaggaatttgtaatt
acttgtcgtttgattcgtac
>Pgl_GLEAN_10012285 PgMYB165
agaaagaataagtagcaaatcaaatctcattaaaagcctctttaaaccgtggtttcccgt
ccgactccgaaaacgcccgcctttcagagcccccgttctgtcacaacgtactcctattca
tgcaggtagtctagggcgagtccgagaacaagtcgagttctttcggaagatcaggcgtgc
acctctagccaccacggctacaggaacaccctatgtgatctatctcgagaatagatctaa
aataagcaaagccgattgaaaacgaagacttcggagaaacacttagtcgctaagaatcgg
attcaacttaatacatcaactagtacaatgatatatgaacaagatcaccaccgggatcct
accttgatcttgcttctagctccgggaactccgacgtggtcttccttgcaaggttcccac
gtcggctagctcgaccctagtcaactagctcgaccctctcctctccgagttggtgtccct
ctcttctctgctcctcggcggccgatgacgaattgaaccatgcgtggctcttgaccccgg
ggctataaatcgcccgaatggcggctaggtcaaagggggaggcgactgggccctggaatg
ggccgggtcgaccggcctgggcccaccccggcccagttgcctgcctccttcgcgtggcgt
tggttcccgagtcttctaaatcatccccccttctgcatgtgggcccttgtcgtcggtttc
tctccgagttgaacgtagctccttgtcccgcaagattcggcacttttctggataggtcct
cagagtttgtcatcttctcgggtttggtccctgggcttcttggagtcaagtttgcttcat
tgcatgacttgtagggggcttcaaggtcttgtcataaggtgcttgatgaacttatcccgg
aagtcttgatttctacgtcaaaaccctgcataaacactaaactccaaaaccgacatgcgc
gaatgaacttattataccaagggggttagtaccaatggataaagtataaaactcatgtca
acaccgaaggtaaactcatggctaggttgacggaatttcaccgtcaacaccctccttatt
tctcaatccgctcatcctctttggtgccccctgagtcatccgatccgtttgtcagtcata
gtcaccaacgtagccagctgtgccagcagcccaagtcacgctacccacatgtcactgccc
aagagctctaccatcgcccaccggacgcccaacgctcgttgcctctcgagcgcaggcctg
cgcgtcgctcctccactgctctacggccttgacggcgtgggcatacgctcttccaccgag
cgttgtcgtgacctcagtcgctcgggccagcaaaccaccacttggtagtgcctagacatc
ctcgacacgggccttcgggcatggccgcttgtacggcgttgcgcatccgcccagcaacac
cgtcgtcggctgcttgctgccgctttgtcgcggcgccgctcgaccatctgttcgtgctgc
tgtggcgctctggtgcccggccgacagagggggttctaggccccgacggccgaccgatac
gcttggccgagaatgggaaacggcctacgttgcagcggagacaagggggtgcgccgtcag
cggatgagctgcgggccgagtaggtggagagacggatgacggtcgggttcgcgacgattc
gcacacgcccgagttaacaggttaatggatggaggcctgaaactatccgcaattgaacgg
tggacatcacaagctgtgcggatccgacggcgagcgagctaacggatgtggacccgctgc
ccgaccgcggatgcaggattcgtataaatgatgatgatgacacgcttctatcccaatcct
aatccagcctttcttatcccacctcatttcccattccctatccaaacgccacctctgtgc
tagattagggtttctgcgtcggctagtttcgacgcagccaagagaccacacagcaggcga
agggaggacgagcagcggcg
>Pgl_GLEAN_10010463 PgMYB154
cgggggtggtccgagcctacgggaaccaccgcaagtgccgggattcccatggctccaggc
gggtacggctccacgtagggctttggaataatctcggctgccaccagggagggggagagg
ttcctcggccgcacgcgccggccggccggccggtgacagcggccgggcgacgatgcgcgc
tttccctacctcgcgccggcggccgctggccacacgatcgacgcgatcgtcacctagcgc
agttcatcggacgtgagcggcggcgaggcctttacgggttaccaaatggggggcgccaag
ccgccaagcgtgcgtgactcgagacgcgcgcggtggtgtggtgccgtggtggtgcccgcc
tgccgctggtggccacgatccgaccgacaaggtttctcttgtcggggggaaattcttctc
atctcgccgtgacaagactgccagggcagggcaccaccacaccagggccagggcgagggg
gaggaaagaaggaagatgagatgaaaacaaacggaataggcacctgtgctttgctcaaag
gtgcaagcttctttgacctgaaaaattcagtttcacgacactacaaaaaagagagtatct
tccgtcagtgttttgctacatgtacgaatcgtgtgactacctctccagtctcggtacatg
tactagattttagctcaacttggtgtaaggtatctgatgcaaactaccttaattggagcg
gtatatacttattgctgtaataacaacggaaccgtgttccacttttttttttataaatag
caaaagaaaaacatcacgatagcttgcaaatacgaatatattaactttagtggcatctat
cttctcaaaatggaggcctgattagagcaagtacgtacacgtcagcagtcccagagatcg
tcccatgcagtgccacataggatttttgatgatgtggaggagagagagcaaggagagaga
agcaggtcgttgcctcacgaaacaaccacctcatgaacgaaacaactacctcatgagaca
actccacaaccattgtatgagttgttcttgccatacaactcataatattccttttttatg
tgcacaaattaaggaattatataggttgtctgttgcgtcgaccaaatattacgtgtaaat
gcatgagacaacctattagactacaccaatgcacttgcccgtgatgagaagtgcctcgtt
tcaaatctaaatttaaatcagcttgctacagacgccagtatatttacaaacagagagtag
atatgagcaaacttgtaatagtgagaataaattaaatacgacaattagttaatcattcct
ggaatttgaaataatggtacgtgttactacaacctagtggtacaatgccattcgatccta
ctctatctagactcgaaattaagatcacaatagcaaacctacaattatacacaccgtgat
cgcaacgtacaatatccatatttctttcccaagtatagtatacgaagaggcgaatcctct
agctaattaaccattgcagcatatatatgcctcttgaactttctccctgctctacttggt
ggaaagcaaaacaaaactactctcatcagaacaatcaatgcctaaatacataataaccat
ttttccccaccagaaagaaagtgaagcctggcacttgctagttcatattccactcgactc
gatcaagaccggtggcgacgacgcgacgagggagggaggggagacagggacgcgtaccgt
ctcggcggggcacagtggaagggaataaagttagttaaccaacgggcgccaatatttatc
ggcggcctcctccgcctccacttcgcccgcccccgcccccgccccgccccgctgcgccct
ttttaaccgctttttaaagctccccacggcctcccctgccttcttgctcccccactcccc
actcgaccacaccacaccccccactggcactgccgcggccggaggcggaggggggctagg
cgcggacagggctcggcgcc
>Pgl_GLEAN_10001419 PgMYB150
tattagatgcgatggtctggatctgacatcaatcttagccgcttttccggcttcgcgtgc
tgctttcccaatcttctaccttggcctgcctttgtcactagggaggctcaaaagagttga
ttttcaaccactggttgataaggcgagttctaagcttgcaaattggatgggaaaattctt
cacgactgcgggaagggcaaccttggtcaaagcggtgctctcttcccagccggtttacta
cctgtctgctcttaatgccccagctgaaactattgaggatatcgacagacgacgcaaaag
gttcctttggaccggcaccgaccaaatcgcaggcggaaaatgcaaggttgcctggccgaa
ggcttgccgaccgactcgtctaggaggcctggggatcctcgacctcaaaaaatttgcgcg
cgctttacgtctacgttggttatggcaggagtggaagtctccgggcaagccttgggttgg
tatgcccattccttgcacagatgaagaccgacgcctttttaattccgccaccaccatcac
tgtcggaaatggggaactggcaagattctgggattctgcttggctgcaaggactcgcacc
gaaacagatcgcgccatccatctatgctatctccaaaaagagagggagaactgttgccaa
cgctacactcaacgacgcgtgggtcctcgacattgacatttcgcgcttacgttctgcatc
acaaattcatgagtttagctttctttgggaacgtctgagagggtttcagctttccccgga
actgcccgattctattgtctggaagctcactaaacacggtcagtacacggcggcctcagc
ttacgaggcccagttttcagatgtgccaagctctcccatggagcacctcatttggcgcgt
ctgggctccgccgaaatgcaaattcttctcttggcttgcgttccaaaacaggttgtggac
tgccgaccgactaatgaagcgcagacgaccaaaccagaaaatctgcatgctctgccgctc
cgtcgacgaaaccggcttgcacatgttcacccaatgccgttatagtctgtctgtctggca
agatatattcaactgggtttcgccgcatgtgccgccgagaactgactggtccacgttcac
atcattggaagaatggtggtcagccattggaagcatgcctggagctcctctcaagggttg
gcgctcactcttaattctggtgtgctgggagttgtggaaggagagaaacgctagaatttt
tcggagaacctttattcacagggggcaactggtgctaaaaatcaaggaggaagcaagatg
ctggatcttggccggagcaaagcatttgagagatattaccaattttgaggagtaattgta
tagctttttctgtttttcgttaggcttaggccttgtttcatcttctctattaattaatac
aaagtcggcaatctcgccgagtttacgttcaaaaaaaaaaaaaaagaaaagggaatcgac
gacgggcggatgcgaaagaaagaaaagggctaggcaccgtgggatgtgcgcggcacgcat
ctcgaggaaataataataatatctggcgcgggcgtggccgtcctagtcacctcggaggct
gccccggaaagagcgcggaaaccccgatcgtgccactgggatcggacggccaagcggatc
aaaaaatatcgggtccacgtggacgcacacacaccttatcggatctgcgcttttttgctc
tttattcctattctctattctattctgcagctatcggcacagcagaaatatctcctcccc
tctcttcttcttcttcttctctccccatccccaaagggcaacccaccgccgccggccggc
cctccgcgtcctccggtctgctgctcctccgctgtcctcctccggtggtagccgcgagca
attggcctgcttatgggctgattcgcgcccccaatcgcccgatccagccagccagccagc
cagccagccagccaaccgag
>Pgl_GLEAN_10004547 PgMYB183
accgactcaagcgatagcgacacaacgaaatcaaatacatacgatctccaatccagtcgg
ctcctcatccagatcgagttaatgagctcgacataccataccaaacctaacggaacaaac
tagtactactaggatgttactaattcgacatcatgttaggccatcacgccccgatcgatc
gatcagtttctttcctcccgagagataagaagaagcgcgtggttttctgctggtgatacg
aaaactcaccacgggaacacgcatggttcttggaatgaacacatgcgcaattttgccggc
cggaacgcataaaacgtgcggcgaagttcagttccatcgtcgcgccgtgctggcatgcat
gtcacgttcacgtcgtaccacgagtgcgaacgacgtgacgtgcgtgctgtgtcacttctc
tcaaaatggagccgcgtgctgtcgaacatcctcaatatgtaagaaagaaaatctgaagag
ggcaccaactgctagtgttttagccggccgggtgaagtgtagctgctgctgaatgaacgt
ccgcatacgaactgaaagggctgtgcacgtacgtggcacggaaaatatgctccctccgta
tcgaaatatttatcgttgttgattttttctcgcaactttgaccgttcgttatattcaaaa
aaattatcgcaaacatgtaaaacgatcggtcaaacttaaaatacatacaacaataaagca
tatagcaaacaaaataaattgtacttgcataattttttgaataaaacgaatggtcaaagt
tgtaaaaaaatcaatagcgacaattatttcgatacagaggagggagtacgaattaaaatt
ccttagtttttcctctatatctctctatctctttttcttttcttttttgacaaatattga
ggttaccttgtttttttaatgtcttttgcttagcggtgatctcgagtagactctcgagtc
tgatgcggcaatatggcactgccaagtggccaacggagccccaacaccaactttgaccag
ccgggtccgccgaaccgggccccacacgcgtggccgagccacgggggtcttaccgacttt
cccaaacaggaaagaacccccgtcctcaacgcgcacatgttccccccgggagtccaggac
acgtctcggtcgctcccagacgcgacacgagccgcgctcgcccaaccacccccatcagcg
gcttgacccaagaggcagcgaaggccaccactccaccgcgagcctttgcccacttccatg
caagtgcccaccgccaacagccagccagccgtgcccgtgagctcgtgctacgcctacgcg
cccgccgatctcgatcgcgtcccggccggcctaaaatcttaggccctgcgctgcgcccct
cacccaaccgccggccgccgccgatcagtcatccgcgttggcctgctaggtgctagctag
gagacggctggccgatcgagctagctctaagagcaactttagcagctcccatttctcatc
cccaatacccaaaaaacagtgatacaggggatcagatgctaaaaaaatctctccagcagc
ctccttatccccttccctctttttctccatggactaaaactccctctccatcccctttat
aaagggaacctctcctccaccccctatcagtgggacccactcacattataaaggagaaga
tgatgtggcattgtgagacccacgagttgggaaggaaaatagggaaactgctggagcaag
ttatgttttagggatgaaaatatttttactccacctccaataacttcatataggggatga
aatttactccatctgatggagttgctctaagctctaccagctgtgcgaaccaactccaaa
tggatccttcctctcctctctgctctcttgctcccttggcgcgcgtgcctatatgtactg
tccatcagcagcctggggttttgcttgggggacagcgtttgcaatttgcgttgcttccgg
ttcgtcgccggcgaggggag
>Pgl_GLEAN_10007566 PgMYB182
ctcaagtgctctaccgaaaatgtaaaagcacaaccccggcctaaatcaaattcaacccct
agctagctagtttgcgaaacacgcacgcacgctgctccatcaccaacaccattgcttcga
tcaaacttttgcaagaatttataaaacgcgtctgccgcctcgacaaactcagattaattt
tgttcatcagatcgatgcctttgatgtatttttatcagcttggaacagttgcaatatggc
ctcatcatggagcagatgtcatgcgcgagacgatcaggtgagagatggtttgctgtgtgg
cgtgcagctccaatcattcaggtcaatgttccgagagagagcctgcctgacgaagttcag
aaaaccccaaagcagaaacgcacaccaccagcttgccagcgccacgaacgacacttactg
ctgcgttgctttcgcccccctcctctgcaataaaacaatgaccgcccaatccctggccag
caaatcatgcgtgggcgttaccaaacggccgatggcaacaggtggacgaagcaacactga
actgaaagccatggctacttgtcaacggcgaccgatcatcttcatccccatctcctcctg
cacaaacaataaaaaaaaacaaactaaaaataatgccacaactcgaccacttccacgccc
ccaactaatcaaaattgcacaagcagctaaagcgcacagcaagcaatggaccttaattat
ctacaattttcttagctgaacgaacagctattactttggatttgaaaaattggctccaga
agaacactagtggaagtccctgacacaccggcccgacgtacacatagcacctcgcttgag
attttgagtttttcatttaccatctggcgtcgacactagccatctattgttgtgcaaatc
cttttttttgcaaatatgctttttatcatatatatataagtgtataagaaatatgctttt
gtgtttttaatttaccatctggcgtcgacactagccatctattggagtatgaaagaagag
agatccaataagaaggaaaaactttggggcaagtaggcagtagtggaggtgaaaaggaaa
gcaagtcgagggaagccaagaacaactccaagtgtgcatgcgtgtatgtgcgcacgcaca
tatatgcggcctagctacacgggtatcctagtgcctgtatataaatactgcaaaagtcgg
cacacaagctccaagccacggcccaatcgccggctgacactctcaagaacctgccccctc
ctccctctggatcgctatcccttttctagtgctcagggaaagctagctcgagagctggga
gaaggaaaaacaagtcctcaagagaggcggagcaagaaccgaggcggatcgctttttgtc
ctcctgccagggactagcctgcccgcgagagatcaagaagggggcgctgcgcctatccag
gtgaaactttgcttctggttgttgggggcctggagttctgctatttgttgtgggattcgt
aggaaattactagctgttttattggattaggtgcgggggtttcgttaattttcaactgcg
ggtggtcaaattcttcagggatgtgtgatttgaggtcacaggattcacgattctgaattc
tgattgtgttgggtcagttcagaggtgttcttgagtccaatctaatttgttcttaaaagg
cgcttcctttccaggataagtatcaagctatctgcaattgattccagtttttcgctcata
cagattccaccttttatccccaatttctgctggaatccttcccacgttcatcttatttga
tttgcatcgacaagaattcagagagagagagagagagagagagagagagagagagagaga
gagagagatcatttaattgttacagtgcttttggaatctttaccttgttctgagatgccc
aaaaaagcaaaaaaagaaatctcacctttgagccctgtgattcctacagtgagctgagct
gcggtcaagaagaaggggag
>Pgl_GLEAN_10009281 PgMYB171
gatggtgtgaagggaagaaaaggaatcttaaaaacaagagctaacatgagctaactagca
tagacgtacgtgtttatacatacacaaaataaataatgtccaagaatctatttacacgaa
gttttaatattgcaaattgaaaaaaaaaattgacgtggatggcttccgtgttgccgtcag
ctcacttgacatgagacaatatgtgtgacatagacgttgtgtatttcgtcgtacagttgt
tcatgtctaatgttgaaagaggtgtcatagaccttcatgtctaatgttgaaagaggtgtc
atagacccaactaaacatttataagtacatcgcgattatgttcaaaattagatcatatct
tccatgggctgaacattatttgactggtgctcaatggtgtgactttgatatgcagcataa
ggcaattaaggaagcatatggcgtatagtatgtacaatataaattaaaaaatacaaaata
caaactcattgtatcttagggcagtcccaatggagaattaattacgtgtttctgtctgtt
aattaccatgacagctcatcatttttctgatgtgtcaaaggaattaaagaagaaaaagaa
tgcaaaatcaaacaaggtgggggggggggggggnnnnnnnnnnnnnnnnnnnnnnnnnnn
nnggtgggggggggggggggcttacgtgagtagggtgatttccaagtgcctcgtacatga
ctagtattactacgtgagcagagagagggctacataatactgcttgccacaattgatctt
actcagtttttaatagatgttgatgctcattaaatataatgctcataggaacgaccataa
gaaactatgaattctctgaaaatactcttcaaatcagtggcagacatgagcgaggctgac
gcctagggccaataaagggtcaaatctagctgctgcacttgagccttcagtgctacagaa
gctacagtatgaaaaaaattggctcacgcctagggccagggccctagtggccctaggctt
ctgtccgcccctgcttccaatgaccatatttggctgaatgcaggtgctaaattatttagg
aaacatacatgcaagagacattattacttattacggatttacgacacaaagggaaagtaa
aatagctacacaatgtagtaacttcaattattctataatagcctgataacatataagaaa
agaaaccctccctccctccctcgttggccttacatgcatcgggtagatattgcttctttt
atggtggaccgtaccactatataccatcgtgttgcttctaaaattagaattataatgttt
cactactctttttgctaactatttaaatatatagagatatagagagataattttgcttct
aaattataataaggtttgtttattttttcctcttgacttctgaaagcacatcacatccta
tctctataaccatgagctagcagtgacctgcgctttctactatgtcctaacgacattaat
taacaaaggtttcaaatactgaaatacacctaacacagtggatctcgttttgaatgtcaa
acaaagacaaatacgggccagggcacgcatgtgttgcgagctaatcttatcgtgccagga
atgaacggccgcagtgcatcatgattttttttttaaaataacaacctttatagattaagc
agccatattacagagcagtcctcgaaagaagactgaattacaagcaggtccagagaccgg
atagacacagacacatccatggtgttgacgacggcgagttcgtcggtgggggtcgcaggg
gcaccaaagttgcatacacccggatggagaccgcgcagtgcgtcggttgaaagtgggtcg
acagagctagtggtgaagacacaccggacaaccaagaattgtgtagaaatctgttgccgg
tagtagcaaatgtcgctcggagtcaaatcccgagggaggacggattcgccgaaactgcgc
cagatgtgagggtgccagtg
>Pgl_GLEAN_10032441 PgMYB158
ggttgtgggtggtaggagtagaaacaaatgacggtattgttttgttccatgctgatgctt
gcttccaaacgctctcaaaggagacgcagacgctagctatgtgtgctgagctcaactctt
acggctgtgtctcgcaacagtacatgcctaatactactactaactagtgcgtgtttaaca
tgtggtgccaattagtagataaatcacaggtactctgctgtccgatgacacgagcggatc
atcgtcatcccgccgagcttttgctcgcttggaagacggatcaattttccctgccttttt
ttataggggaaaaggaatgttttgaattgcctggattttcaacaagccattagggaaaaa
gtgctgctgctacatgcctaaaatatttccacttgtgtgaacgacactatggcagcagtg
cctaaacaaatatccatttttggggtgcgcacaaagcaagcatgggagtggtccgagtgg
aggggcagagcctcgacatgaaacaatatgataaatgtgacgggaatctctcactgaatt
tccttctcgcaaggcaccaccaaggcggcaatcatttatgtgccactgttaaggtggtcc
atcggttaggttgctaataatatgcaggtgcgtactcggatagcacttacatatatggca
tctgtgcgacaattgcagaggcaccaaattttacatgcatgcacgtaagcctgccattgg
ggagggtatggacaaatccactttagttcataccaaatccaaataattattatccacttc
ttaccctccccattcccacccatacccaatggataactagttttgtactagattctatac
atacccaatcgattatttgcaccctcctcacaccctaccctccccatttcttcaatggat
aattattttctacccataccctccccatttgaggtgggtgtggatttgaatatggataat
ggataaaaacaacaggcatacatgcacgggaataattgtacccttgctcttccggacttc
ttgtccttgcacaatatacgattttagaaggaccacgtgaaggaagccggggtgaatgtc
ttcacgtgagctacccctagatatgcagtacaattcactgcaggagaaacatcgtttgag
ctttgattgttacgcaaaaatttaaaacttatgccatacttgggtcaaagcaatctccat
gcagaatgttgggccagtttttgtacgattcttcttttaggcaaactatatttttttgtt
taagatgtcctattattattattattattattattattattattattattattattatta
ttattattgttgttgttgttgttgttattattatttgtttgctatgaaaaacttacgttg
gtatccgcttactccttgcacccatgtggaaaacagcaacagaacgtgacaacaaaatgc
tagactagctttgacaataatgcataagaatctctagaacaaagattaaaaaaacaaaag
aaaaacgcaagccaactagctttgagtagagaggaaagcaggtggcaaggccaataaaca
aattcaagaacgcaaacaaacacctgcaactgcacaaaagcttcccttgacatacctggc
ctggaacagagaaacagaccagtgaactccaagcaaagttcattaaaaaaaatccaaacc
gagcaaacttaagcagtaaatatcaaatttaccggggatttcactgtgagaaagccttgt
actccccttggtttgagagttgagaggccacaaactccaccaagacccaatcacaagcat
ccacttccttgctcgccttttctctgcctccgacggtggagccggaataaaactccggcc
acttcgccatctgccggaatttgatacttcccctctatattctcacgctaccttccacct
cccccttttacttctctcccccgccttcttcgccaccagccagccagctcaggtgtgcag
gcagcgcagcagcggccaag
>Pgl_GLEAN_10022161 PgMYB152
agtgcggcggcgcggccagctcgacgccaggagcccaggacaagctgtgtaggtggcggc
gagggcaagggttcgacgcggtggtaggggtgaccgggtgaggtttcatcgcgacgtcaa
ggccgtggtgaggttgcgccggaactctcacctcccgcactcgatcccatccaactcgtt
ggtaagtcgaaacacatcgtacaacggaggagttgtcatcgctatggcatgggagcacga
cgacggcaccgcgcggttcagttgagccttgctaatcggaattaaccggataaaaacgcc
gtattaattagcgttatacatacccttgcatgagatgttaaatatttatattagtatgaa
gttctttcttaacttccctggtcatttttttgtgccacatgcatttatggaaaccatatg
ctgctgcaggatatgagcttttttttaagggcaaactgtgaggggagttcccacaacccc
acagcacttcaattttatattaaagttagaggggttagagtccgatacttacattcattt
acaacaaggacaaaaacaaagaaaaagaggggtagggagagcagagcaacaaattacttg
tattcttagaggcgtgcagtgtgcagaaaatgttttaagcacagttggggtttttccagt
tacttttggatatgttttctgctagttttttcatttactttgccgtgctattagaacaaa
ggtaattgacccatattgtaaggaaaaattagtcctaataaaaaagataactatataggg
ggtaaaaatccaatatagcatacacatattttgatagtctaaaagggagaagtggacatc
agactagattcagcatagtagcactacagaatccagaataccgagctgaaagtttggaaa
agtggcaaagaaaatttaaaaacaccggagaacgaatcctggatggaccccttaatgcga
tattattccatttgaaaatgaaaaggcaagatctatattcttatacacgagaaccctctt
ctggtcatggaatatactgttgtgcaacttgctatttggagattattccaattaacttag
tgctctcggcgaaggaagtaattgcacgagagcgccttgttaagtttttggttgtgccct
ctaaataaacctctatacatttctactgagaaatactcctataagttttcacctaaaaaa
ttaagacaatgatttccatcctcggtggtgaggacgtactaacatatccaacaaccaaaa
agccgtgtttggattaacactaaaacggatcttgaagccacagtgtagacgtgtagtata
caacaagcaggtctcaagatagctaggcagcatgcgccaagcgcaagactacaagcaacg
catagagccattgcaagtttacaacacaaagagctcttggccaacctgcaggtcgccaat
aaactgcacaggaggtcgatcatgtggtctctagtgcgttcacatgagcatcagctagcg
agcgagcacgagtgctcaggtgccccctagctaacctggccggagcagtcgcaaagacac
aacagttgggcggggttgggtcacgacacgacctgactgtgcagtgcccatccgcccatg
catctatactgctagctatacagcgggaagagatgaggagataaaaagttcggcgcgaga
tatatcccccacttccctgggacacaaatcttttgttcgtccttgcgcgagcgacactcc
tggctctccgcgctcccggctcaccgatgccttattctcccggccggctttcccgtggcc
ccatcggccatcgcacagctagcacacaggcgccaatgcaccatcatccttcacgggcag
ccccggccccctataagtagcgctgcttccccacgctcctcttctcatcacaagctagtc
aagaaccagctgagctaccacccctcctcgtccagcagctctaacatataggaggagtat
atcatctcagagcgatcgag
>Pgl_GLEAN_10022160 PgMYB153
ttttgagtgcatggtcaagctactaatgtacgaactcctcttaatagtacggtcgaaact
acaaactagcaatccaagtgtccttcatctcctttgtgacacttggaactaacaaagtcc
ttagccttgtagtatccaaccatattgagaccattaattcagattgagcggtctcattcc
attcaatacttgtgacaataacccaaataaaaatccgcttcaaaacaaaggttagtcaca
agtatatggttgccatttatcaccgaaacacacccttaccaaaggtgcgaaagggcctag
atcgctacactgcatggtttatttcaccggatttgcccctatgatgacagggaactcaaa
ggccaaaaatccacatgccacgctaccacatatttaatggggtttaagaatttcattgaa
aatagtttaaattttgtacgaatcgggaaatataaaatgtgtgattgtggagggatacca
tccatcaaacaaagagaaagtgaaggctcttcatagctagtacaatgggcaatatatcca
acaagttaaaagtgtttggattgatccacatttaatagaatcaataactacgccaagata
ttgaaaagaattgtctacaaaacttactatttctacgaactctaaaatatattctaatat
ttctagagaatccactctaatcatgaacaacaagcagtaaaatttatagaactcccaaaa
tcaaaagtttaatcttgttttagacaaattaatgatgtctatcaaagtctgtccattaga
acaaagtaattttaacatgaaccgaaaacatctcttaaaatgctaagatatcataaaacc
atgaaaatatactacaactatatttaaaaattaactattcataaactctattatgctata
tactcagtttttgcagtcatcagtttatgatgtttttatgcttgacctatgctctcatta
ttttagttggttcccgcttcttggatttaatactactactggtagttgatgcaaaagagg
agagacaccacgtgccaaaaacatgccgatattttggaggcaacgatgatggatacctta
gcaaatcatggttggaggttcatgaatagatttcatgaggcctaaagatacaaccttagt
gcacgtttggtagggttttccatctgattctaattctctatgtgagctgctgagagaaac
catatgtggttgaaagtgattctccctaattcttcacgataaactttatggataaatgat
tgctgttatcatcatttaatctttctagatactttgtttccctaacttgtagccttggag
aaatacttatcaaatctagccacttcacaaaattctgagaacgtttttttaggatccacg
agatgaggctttctaattttattgccattatatatgcttcaaaatctctgcattagctgt
gacaattagaccatacaatccctattattataacatgacaaaaaagacagtgaaatgaca
cactggaggacctagccagcagacaaacatcatcatttacaaagacaaatagacactagt
aactgaagttgagcactgagagcgaggctgaccgccataggtagcttagctaactcatta
aatctcgtcaaacataacatttacgatttgtagtaacgctactacaaagacaaagaggac
agtcaaaaaatgacatagaggccgttagaacgaagatggttatcatttacttctcctttt
cctacgtgggcagcaccagctaccaatgcccggtcttttgccagttggaaacagatgctg
gccacttggcctcatatacccagccccacggatcctataaattgaaccctcacaactcgg
ctgttcccatcacaaccatttcaaaacctcctttccctacgccggttacatcaccggcca
gatcgacgcacaaacctccgaaaagatcggccgggacccctgcccgtcgtcgtcgtccgt
gttccaaacaaaccgctgcc
>Pgl_GLEAN_10016246 PgMYB184
actggatcaggcccctgccgctccccccccgccggcttgaagaagtctctacagctacga
cgacgtcaccaccagcaggggggacacccgctcgtgtgacgcatcgccgccggtcactcc
ctctcccggccgctccgctctatatccggtggaggtggagaagagatccgcgcaggcgag
ggccttccctgctcgcgttggtcagtaatcctagcttgctttgatggattcctcatgggt
ggaatgggtggtctggtctcgtccctcagttaaacccaaacctccattcctcgccattcg
gattcattacttgtatgccatccatccatggttcgattaggaattaggattgagcgcgtg
cagttttttttctctcggaatttttgggggtttcaactgaatcccccttgaccccgcagc
ttgcgcttcgtcagcgcgtaggataacgcatgctaaggtgtcagcacagtatatttcccc
[truncated: 28,366 more chars]
