# Supplementary material for: Genome-Wide Identification and Transcriptional Analysis of the MYB Gene Family in Pearl Millet (Pennisetum glaucum)
Source: Int J Mol Sci. 2023 Jan 27;24(3):2484. doi: 10.3390/ijms24032484 (PMC9916650; doi:10.3390/ijms24032484)
Supplement: Supplementary file 1 [file ijms-24-02484-s001.zip › Table S1. Summary of MYB familiy identification in monocotyledonous and dicotyledonous plants 20221128.xlsx]

## Sheet: Sheet1
Table S1. Summary of MYB familiy identification in monocotyledonous and dicotyledonous plants
Species	Common name	Total	MYB - R2R3	MYB - related	MYB – 3R	MYB – 4R	Atypical genes	Referenceb
Monocotyledon
Brachypodium distachyon	Brachypodium	122	85	34	3	0	0	Chen et al., 2017
Oryza sativa	Rice	155	88	62	4	0	1	Katiyar et al., 2012
Pennisetum glaucum	Pearl millet	208	106	97	3	0	2	Current study
Setaria italica	Foxtail millet	210	114	90	6	0	0	Muthamilarasan et al., 2014
Triticum aestivum	Wheat	n.d.a	393	n.d.	12	n.d.	n.d.	Wei et al., 2020
Zea mays	Maize	n.d.	157	n.d.	n.d.	n.d.	n.d.	Du et al., 2012a
Dicotyledon
Arabidopsis thaliana	Arabidopsis	196	126	64	5	1	0	Stracke et al., 2001
Arachis hypogaea	Peanut	443	209	219	12	3	0	Bertioli et al., 2019
Brassica napus	Rapeseed	n.d.	249	n.d.	n.d.	n.d.	n.d.	Hajiebrahimi et al., 2017
Cucumis sativus	Cucumber	n.d.	55	n.d.	n.d.	n.d.	n.d.	Li et al., 2012
Glycine max	Soybean	257	244	0	6	2	0	Du et al., 2012b
Gossypium hirsutum	Cotton	524	363	144	15	2	0	Salih et al., 2016;
Medicago sativa	Alfalfa	n.d.	186	50	26	0	3	Zhou et al., 2019
Nicotiana tabacum	Tobacco	n.d.	174	n.d.	n.d.	n.d.	n.d.	Yang et al, 2022
Populus trichocarpa	Poplar tree	n.d./354	192/196	n.d./152	5/5	n.d.	n.d.	Wilkins et al., 2009; Yang et al., 2021
Solanum lycopersicum	Tomato	127	122	0	4	1	0	Li et al., 2016
Solanum melongena	Eggplant	n.d.	73	n.d.	n.d.	n.d.	n.d.	Wang et al., 2016
Solanum tuberosum	Potato	217	124	90	3	0	0	Li et al., 2021
a n.d., Not determined
b Reference: Bertioli et al. (2019), DOI: 10.1038/s41588-019-0405-z; Chen et al. (2017), DOI: 10.1093/pcp/pcx115; Du et al.(2012a), DOI: 10.1371/journal.pone.0037463; Du et al. (2012b), DOI: 10.1186/1471-2229-12-106; Hajiebrahimi et al. (2017), DOI: 10.1139/gen-2017-0059; Katiyar et al. (2012), DOI: 10.1186/1471-2164-13-544; Li et al. (2012), DOI: 10.1371/journal.pone.0047576; Li et al. (2016), D…
