# Supplementary material for: Genome-Wide Identification and Transcriptional Analysis of the MYB Gene Family in Pearl Millet (Pennisetum glaucum)
Source: Int J Mol Sci. 2023 Jan 27;24(3):2484. doi: 10.3390/ijms24032484 (PMC9916650; doi:10.3390/ijms24032484)
Supplement: Supplementary file 1 [file ijms-24-02484-s001.zip › Table S2. Characterization of pearl millet MYB family members.xlsx]

## Sheet: Sheet1
Table S1. Characterization of pearl millet MYB family members
Gene ID	Gene Name	Sub-Family	Chromosome location	Start position	End position	Gene orientation	Genomic DNA sequence length (bp)	CDS length (bp)	Number of exon	Number of signature domains	Position of signature domain(s) in protein	Protein sequence length (amino acid)	Molecular weight (kDa)a	Subcellular localizationb	Isoelectric point (pI)a	Grand average of hydropathicity (GRAVY)a	Instability indexa	Stabilityc
Pgl_GLEAN_10012352	PgMYB1	MYB-R2R3	Chr1	797639	798571	+	932	711	3	2	9-59; 62-110	237	27.0539	nucl	8.68	-0.608	72.58	unstable
Pgl_GLEAN_10025141	PgMYB2	MYB-R2R3	Chr1	2587119	2590232	-	3113	852	5	2	38-88; 91-139	284	31.9705	nucl	5.76	-0.744	55.09	unstable
Pgl_GLEAN_10019982	PgMYB3	MYB-R2R3	Chr1	52231622	52232874	-	1252	864	3	2	14-64; 67-115	288	31.4916	nucl	6.37	-0.425	45.8	unstable
Pgl_GLEAN_10034693	PgMYB4	MYB-R2R3	Chr1	75861241	75869466	-	8225	957	4	2	13-63,66-114	319	35.104	nucl	11.31	-0.771	62.45	unstable
Pgl_GLEAN_10034708	PgMYB5	MYB-R2R3	Chr1	76466325	76467272	+	947	831		undefinedd
Pgl_GLEAN_10034717	PgMYB6	MYB-R2R3	Chr1	76658830	76660519	-	1689	1059	3	2	13-63; 66-114	353	39.2388	nucl	5.84	-0.748	49.1	unstable
Pgl_GLEAN_10031720	PgMYB7	MYB-R2R3	Chr1	79574293	79575500	-	1207	945	3	2	13-63; 66-114	315	34.6673	nucl	5.94	-0.591	63.97	unstable
Pgl_GLEAN_10020657	PgMYB8	MYB-related	Chr1	97682462	97683410	-	948	717	2	1	136-186	239	27.4583	nucl	7.05	-0.685	33.17	stable
Pgl_GLEAN_10004174	PgMYB9	MYB-related	Chr1	101310791	101311942	+	1151	933	2	1	136-186	311	34.8262	nucl	5.85	-0.557	33.93	stable
Pgl_GLEAN_10004173	PgMYB10	MYB-related	Chr1	101331425	101332628	+	1203	897	3	1	123-173	299	33.4171	nucl	5.14	-0.55	35.56	stable
Pgl_GLEAN_10018773	PgMYB11	MYB-related	Chr1	183947465	183947731	-	266	264	1	1	13-63	88	10.1277	nucl	9.14	-0.733	50.16	unstable
Pgl_GLEAN_10001056	PgMYB12	MYB-related	Chr1	192824095	192827253	+	3158	987	2	1	48-96	329	35.4975	nucl	5.7	-0.599	52.62	unstable
Pgl_GLEAN_10027640	PgMYB13	MYB-related	Chr1	193265982	193266996	-	1014	897	2	1	31-83; 140-190	299	32.8661	nucl	6.51	-0.567	51.73	unstable
Pgl_GLEAN_10025716	PgMYB14	MYB-3R	Chr1	197223702	197229892	-	6190	1824	7	3	65-114; 117-166; 169-217	608	67.5633	nucl	7.09	-0.596	48.65	unstable
Pgl_GLEAN_10035698	PgMYB15	MYB-related	Chr1	206068521	206070325	-	1804	1179	6	0	none	393	43.6958	nucl	6.26	-0.711	39.21	stable
Pgl_GLEAN_10013674	PgMYB16	MYB-related	Chr1	225721911	225723025	+	1114	816	3	1	17-68	272	29.027	nucl	6.39	-0.548	69.52	unstable
Pgl_GLEAN_10015908	PgMYB17	MYB-R2R3	Chr1	227164183	227165346	+	1163	870		undefined
Pgl_GLEAN_10011787	PgMYB18	MYB-related	Chr1	232114066	232115149	+	1083	261	2	1	11-64	87	9.88498	cyto	6.57	-0.93	65.67	unstable
Pgl_GLEAN_10011796	PgMYB19	MYB-R2R3	Chr1	232344407	232345210	+	803	696	2	2	22-72; 75-123	232	25.5415	nucl	8.55	-0.595	46.77	unstable
Pgl_GLEAN_10011958	PgMYB20	MYB-related	Chr1	237855754	237856470	-	716	591	2	1	20-70	197	21.3067	nucl	9.36	-0.662	43.87	unstable
Pgl_GLEAN_10027871	PgMYB21	MYB-related	Chr1	241765297	241766737	+	1440	900	3	1	121-171	300	32.035	nucl	9.72	-0.461	70.35	unstable
Pgl_GLEAN_10029419	PgMYB22	MYB-R2R3	Chr1	252841481	252843058	+	1577	1290	3	2	13-63; 66-114	430	47.4518	nucl	5.91	-0.649	58.2	unstable
Pgl_GLEAN_10005876	PgMYB23	MYB-R2R3	Chr1	254795399	254796970	+	1571	621	3	2	17-30; 37-87	207	23.0718	nucl	5.2	-0.526	62.36	unstable
Pgl_GLEAN_10021026	PgMYB24	MYB-related	Chr1	255881990	255888985	+	6995	4770	5	2	725-773; 936-984	1590	172.605	nucl	6.27	-0.606	53.53	unstable
Pgl_GLEAN_10021620	PgMYB25	MYB-R2R3	Chr1	258113995	258114905	-	910	747	2	2	34-84; 87-135	249	27.5932	nucl	10.21	-0.782	75.2	unstable
Pgl_GLEAN_10021618	PgMYB26	MYB-R2R3	Chr1	258177854	258178903	-	1049	648	3	2	32-82; 85-133	216	24.4204	nucl	9.39	-0.725	70.42	unstable
Pgl_GLEAN_10011728	PgMYB27	MYB-related	Chr1	262951963	262952651	-	688	594	2	1	38-86	198	21.26	nucl	6.2	-0.289	55.75	unstable
Pgl_GLEAN_10011717	PgMYB28	MYB-3R	Chr1	263118850	263131389	+	12539	2823	10	3	5-49; 52-101; 104-152	941	104.575	nucl	5.11	-0.709	53.69	unstable
Pgl_GLEAN_10038213	PgMYB29	MYB-related	Chr1	270595969	270601579	-	5610	1908	8	1	272-320	636	69.3199	nucl	6.66	-0.314	48.74	unstable
Pgl_GLEAN_10038222	PgMYB30	MYB-R2R3	Chr1	270683805	270684526	+	721	603	2	2	13-63; 66-114	201	22.0147	nucl	9.45	-0.711	61.1	unstable
Pgl_GLEAN_10038224	PgMYB31	MYB-R2R3	Chr1	270729510	270730306	-	796	675	2	2	13-63; 66-114	225	24.8518	nucl	8.94	-0.851	61.05	unstable
Pgl_GLEAN_10009918	PgMYB32	MYB-R2R3	Chr1	274900694	274901836	-	1142	1017	2	2	13-63; 66-114	339	36.5942	nucl	6.18	-0.436	57.52	unstable
Pgl_GLEAN_10013171	PgMYB33	MYB-R2R3	Chr2	3124453	3126666	+	2213	1329	3	2	135-184; 187-235	443	50.1997	nucl	5.77	-0.591	56.35	unstable
Pgl_GLEAN_10022854	PgMYB34	MYB-R2R3	Chr2	8374146	8375336	+	1190	951	3	2	13-64; 67-115	317	34.9288	nucl	8.5	-0.515	59.92	unstable
Pgl_GLEAN_10013746	PgMYB35	MYB-related	Chr2	8836805	8841561	-	4756	873		undefined
Pgl_GLEAN_10023444	PgMYB36	MYB-related	Chr2	11364070	11369344	+	5274	1695	12	1	107-156	565	63.4428	nucl	7.56	-0.782	51.24	unstable
Pgl_GLEAN_10002927	PgMYB37	MYB-R2R3	Chr2	15881959	15883302	-	1343	717	3	2	3-52; 55-103	239	27.3472	nucl	6.33	-0.998	65.89	unstable
Pgl_GLEAN_10001156	PgMYB38	MYB-related	Chr2	16117700	16130307	-	12607	5079		undefined
Pgl_GLEAN_10005188	PgMYB39	MYB-related	Chr2	16440909	16441463	+	554	552	1	1	29-77	184	20.3994	mito	9.6	-0.291	44.37	unstable
Pgl_GLEAN_10013105	PgMYB40	MYB-related	Chr2	28088750	28091314	+	2564	1044	5	1	4-59	348	37.9783	nucl	6.35	-0.254	33.21	stable
Pgl_GLEAN_10009335	PgMYB41	MYB-R2R3	Chr2	28546397	28548210	+	1813	1032	4	2	6-55; 60-108	344	38.2584	nucl	5.03	-0.76	59.07	unstable
Pgl_GLEAN_10031141	PgMYB42	MYB-R2R3	Chr2	36591916	36594448	-	2532	966	4	2	46-96; 99-147	322	34.4121	nucl	5.37	-0.688	64.29	unstable
Pgl_GLEAN_10021657	PgMYB43	MYB-R2R3	Chr2	43401652	43403095	+	1443	795	3	2	3-54; 57-105	265	29.2546	nucl	9.47	-0.513	71.78	unstable
Pgl_GLEAN_10004603	PgMYB44	MYB-related	Chr2	47464253	47464684	+	431	273	2	1	13-63	91	10.7004	nucl	9.95	-0.721	41.7	unstable
Pgl_GLEAN_10032286	PgMYB45	MYB-related	Chr2	49560523	49562884	+	2361	867	4	0	none	289	32.9872	nucl	5.8	-0.503	43.07	unstable
Pgl_GLEAN_10011452	PgMYB46	MYB-related	Chr2	53257854	53258328	-	474	294	3	1	10-62	98	11.6188	mito	11	-0.81	33.68	stable
Pgl_GLEAN_10010867	PgMYB47	MYB-related	Chr2	53297119	53300327	-	3208	702	5	1	57-109	234	26.2166	nucl	9.2	-0.782	53.13	unstable
Pgl_GLEAN_10021368	PgMYB48	MYB-related	Chr2	68782565	68786613	-	4048	804	7	1	29-78	268	29.7564	nucl	4.93	-0.453	38.24	stable
Pgl_GLEAN_10004924	PgMYB49	MYB-R2R3	Chr2	69259023	69260454	-	1431	1203		undefined
Pgl_GLEAN_10029006	PgMYB50	MYB-related	Chr2	88036698	88038188	-	1490	936	2	1	139-189	312	34.6477	nucl	5.8	-0.573	27.97	stable
Pgl_GLEAN_10029495	PgMYB51	MYB-related	Chr2	90670801	90676646	+	5845	2154	12	1	251-304	718	77.544	nucl	6.46	-0.292	48.54	unstable
Pgl_GLEAN_10036530	PgMYB52	MYB-related	Chr2	95224390	95229610	-	5220	2286	10	1	611-659	762	84.4457	nucl	4.89	-0.941	39.62	stable
Pgl_GLEAN_10023193	PgMYB53	MYB-R2R3	Chr2	97683813	97684722	+	909	750	3	2	13-63; 66-114	250	27.1223	nucl	8.81	-0.588	46.99	unstable
Pgl_GLEAN_10023203	PgMYB54	MYB-related	Chr2	98076819	98078515	+	1696	948	2	1	138-188	316	35.7091	nucl	8.41	-0.644	33.07	stable
Pgl_GLEAN_10028194	PgMYB55	MYB-R2R3	Chr2	105210328	105211447	+	1119	969	3	2	13-63; 66-114	323	36.22	nucl	6.07	-0.584	51.91	unstable
Pgl_GLEAN_10005446	PgMYB56	MYB-related	Chr2	118893917	118895114	+	1197	936	2	1	134-184	312	35.5266	nucl	6.35	-0.856	38.6	stable
Pgl_GLEAN_10032646	PgMYB57	MYB-R2R3	Chr2	120285067	120286075	+	1008	681	4	2	13-63; 66-114	227	25.3517	nucl	5.31	-0.634	57.29	unstable
Pgl_GLEAN_10036901	PgMYB58	Atypical MYB genes	Chr2	127912146	127920027	+	7881	2043	9	4	386-457; 459-506; 509-575; 579-630	681	77.0763	nucl	8.44	-1.202	39.17	stable
Pgl_GLEAN_10023164	PgMYB59	MYB-R2R3	Chr2	184327994	184329956	-	1962	870	3	2	1-35; 38-86	290	31.983	nucl	6	-0.572	57.45	unstable
Pgl_GLEAN_10023163	PgMYB60	MYB-3R	Chr2	184393490	184399542	-	6052	1491	6	3	22-70; 179-228; 231-279	497	55.9229	nucl	6.72	-0.792	54.99	unstable
Pgl_GLEAN_10037977	PgMYB61	MYB-related	Chr2	194567818	194569963	-	2145	1557	6	0	none	519	57.3974	nucl	6.02	-0.848	66.48	unstable
Pgl_GLEAN_10028237	PgMYB62	MYB-related	Chr2	198578058	198589511	+	11453	3285	20	1	14-62	1095	121.386	nucl	8.91	-0.746	50.64	unstable
Pgl_GLEAN_10017572	PgMYB63	MYB-related	Chr2	213768147	213771923	-	3776	1491	6	1	249-297	497	54.085	chlo	6.18	-0.417	50.67	unstable
Pgl_GLEAN_10016698	PgMYB64	MYB-related	Chr2	217974037	217978016	+	3979	1905	6	0	none	635	69.2604	nucl	6.07	-0.556	44.4	unstable
Pgl_GLEAN_10027845	PgMYB65	MYB-related	Chr2	222878707	222880650	+	1943	1050	6	0	none	350	38.2578	nucl	8.48	-0.521	42.16	unstable
Pgl_GLEAN_10020538	PgMYB66	MYB-related	Chr2	236248342	236250458	+	2116	1413	7	0	none	471	51.6636	nucl	6.23	-0.7	61.24	unstable
Pgl_GLEAN_10018078	PgMYB67	MYB-R2R3	Chr2	242053371	242054563	+	1192	852		undefined
Pgl_GLEAN_10031135	PgMYB68	MYB-related	Chr3	1588548	1590568	-	2020	1134	6	0	none	378	41.7922	chlo	6.14	-0.396	50.96	unstable
Pgl_GLEAN_10002978	PgMYB69	MYB-R2R3	Chr3	3383904	3387612	-	3708	951	4	2	13-64; 67-115	317	35.2005	nucl	9.61	-0.996	67.85	unstable
Pgl_GLEAN_10010695	PgMYB70	MYB-related	Chr3	8058303	8060597	+	2294	822	6	0	none	274	30.1192	cyto	8.39	-0.538	32.95	stable
Pgl_GLEAN_10031638	PgMYB71	MYB-related	Chr3	9268884	9272016	+	3132	642	5	1	57-109	214	24.0824	nucl	9.46	-0.712	46.39	unstable
Pgl_GLEAN_10012406	PgMYB72	MYB-R2R3	Chr3	13130719	13131887	+	1168	975	3	2	13-63; 66-114	325	36.1619	nucl	5.84	-0.471	51.77	unstable
Pgl_GLEAN_10012225	PgMYB73	MYB-R2R3	Chr3	16546883	16547771	+	888	546	3	2	13-63; 66-114	182	20.4555	nucl	7.07	-0.51	44.33	unstable
Pgl_GLEAN_10008203	PgMYB74	MYB-R2R3	Chr3	25676997	25678321	+	1324	1062	3	2	15-65; 68-116	354	37.2854	nucl	4.57	-0.328	48.22	unstable
Pgl_GLEAN_10027659	PgMYB75	MYB-related	Chr3	27229177	27231397	+	2220	1428	5	1	52-100	476	50.2616	nucl	6.91	-0.578	51.52	unstable
Pgl_GLEAN_10027682	PgMYB76	MYB-related	Chr3	28080709	28084771	+	4062	726	7	1	36-84	242	26.6161	nucl	9.47	-0.557	42.76	unstable
Pgl_GLEAN_10029306	PgMYB77	MYB-related	Chr3	39068797	39070303	-	1506	552	3	1	14-64	184	20.4353	nucl	6.33	-0.459	39.82	stable
Pgl_GLEAN_10029303	PgMYB78	MYB-R2R3	Chr3	39139785	39142393	-	2608	540	4	2	14-64; 67-115	180	20.3077	nucl	7.65	-0.831	62.97	unstable
Pgl_GLEAN_10008396	PgMYB79	MYB-R2R3	Chr3	41426566	41427520	+	954	741	2	2	4-54; 57-105	247	27.878	nucl	5.68	-0.847	68.17	unstable
Pgl_GLEAN_10027268	PgMYB80	MYB-R2R3	Chr3	47927271	47928520	+	1249	870	3	2	15-65; 68-116	290	32.8554	nucl	5.33	-0.757	57.04	unstable
Pgl_GLEAN_10024409	PgMYB81	MYB-R2R3	Chr3	59460364	59462238	-	1874	723	4	2	14-64; 67-115	241	26.5469	nucl	7.66	-0.555	60.13	unstable
Pgl_GLEAN_10030848	PgMYB82	MYB-related	Chr3	82373096	82377017	-	3921	1263	6	0	none	421	45.8896	cyto	5.27	-0.487	63.51	unstable
Pgl_GLEAN_10033508	PgMYB83	MYB-related	Chr3	115449110	115449967	+	857	600	3	0	none	200	21.983	nucl	5.02	-0.859	53.76	unstable
Pgl_GLEAN_10003205	PgMYB84	MYB-R2R3	Chr3	148681995	148689668	+	7673	2559	9	2	20-69; 72-120	853	92.9693	nucl	4.98	-0.611	56.09	unstable
Pgl_GLEAN_10009766	PgMYB85	MYB-R2R3	Chr3	172878161	172880023	-	1862	804	4	2	13-63; 66-114	268	28.9405	nucl	7.22	-0.47	47.5	unstable
Pgl_GLEAN_10038634	PgMYB86	MYB-R2R3	Chr3	193927717	193932983	+	5266	2931	4	2	6-55; 58-105	977	109.677	nucl	5.28	-0.955	54.41	unstable
Pgl_GLEAN_10010553	PgMYB87	MYB-R2R3	Chr3	230874042	230876313	+	2271	870	4	2	13-63; 66-114	290	31.7526	nucl	6.21	-0.559	62.91	unstable
Pgl_GLEAN_10000886	PgMYB88	MYB-related	Chr3	238259114	238262902	+	3788	1677	7	1	241-289	559	61.7636	nucl	5.91	-0.524	43.5	unstable
Pgl_GLEAN_10012731	PgMYB89	MYB-R2R3	Chr3	238496740	238498133	-	1393	846	2	2	13-63; 66-114	282	30.7574	nucl	5.72	-0.645	35.69	stable
Pgl_GLEAN_10018370	PgMYB90	MYB-R2R3	Chr3	253450474	253452242	-	1768	720	4	2	17-67; 70-118	240	26.8733	nucl	8.79	-0.824	53.58	unstable
Pgl_GLEAN_10035636	PgMYB91	MYB-R2R3	Chr3	256272527	256273940	-	1413	687	4	2	13-63; 66-114	229	25.9593	nucl	5.78	-0.686	60.1	unstable
Pgl_GLEAN_10003061	PgMYB92	MYB-R2R3	Chr3	260702446	260703687	-	1241	555	4	2	13-63; 66-114	185	20.4863	nucl	7	-0.362	36.93	stable
Pgl_GLEAN_10003063	PgMYB93	MYB-R2R3	Chr3	260772760	260774965	-	2205	621	4	2	14-64; 67-115	207	22.5494	nucl	8.15	-0.544	44.92	unstable
Pgl_GLEAN_10033575	PgMYB94	MYB-R2R3	Chr3	272420804	272422298	+	1494	1014	3	2	25-75; 79-127	338	36.3071	nucl	8.85	-0.429	65.75	unstable
Pgl_GLEAN_10015401	PgMYB95	MYB-related	Chr3	277698007	277698927	+	920	342	3	1	13-63	114	12.8887	nucl	8.66	-0.646	62.5	unstable
Pgl_GLEAN_10018049	PgMYB96	MYB-related	Chr3	278678155	278681210	+	3055	909	6	0	none	303	32.3715	nucl	9.45	-0.48	59.45	unstable
Pgl_GLEAN_10022511	PgMYB97	MYB-related	Chr3	282395600	282397845	-	2245	1356	6	1	58-106	452	49.5727	nucl	8.3	-0.662	54.2	unstable
Pgl_GLEAN_10023805	PgMYB98	MYB-R2R3	Chr3	285681859	285682510	-	651	468	2	2	14-66; 69-117	156	17.8133	nucl	9.71	-0.927	58.99	unstable
Pgl_GLEAN_10023817	PgMYB99	MYB-R2R3	Chr3	285885710	285887095	-	1385	1068	4	2	15-65; 68-116	356	37.8386	nucl	5.04	-0.482	50.76	unstable
Pgl_GLEAN_10004210	PgMYB100	MYB-related	Chr3	286573502	286575753	+	2251	795	6	0	none	265	29.6799	mito	9.27	-0.75	38.55	unstable
Pgl_GLEAN_10031939	PgMYB101	MYB-related	Chr3	299507833	299508581	-	748	678	2	1	57-105	226	24.666	nucl	8.76	-0.42	58.65	unstable
Pgl_GLEAN_10031924	PgMYB102	MYB-related	Chr3	299679876	299682059	-	2183	1323	7	0	none	441	48.0282	nucl	6.36	-0.498	55.43	unstable
Pgl_GLEAN_10031849	PgMYB103	MYB-related	Chr3	300773715	300776344	-	2629	885	4	2	16-64; 121-171	295	30.4688	nucl	6.26	-0.592	58.21	unstable
Pgl_GLEAN_10005856	PgMYB104	MYB-R2R3	Chr4	870277	875390	-	5113	2394	2	2	6-55; 58-105	798	90.6978	nucl	7.6	-0.859	53.62	unstable
Pgl_GLEAN_10015286	PgMYB105	MYB-R2R3	Chr4	9046418	9047404	-	986	531	2	2	16-68; 71-119	177	19.531	nucl	9.67	-0.763	62.79	unstable
Pgl_GLEAN_10021819	PgMYB106	MYB-R2R3	Chr4	12207282	12208385	+	1103	1101		undefined
Pgl_GLEAN_10007729	PgMYB107	MYB-R2R3	Chr4	13976894	13977825	-	931	720	6	2	9-59; 62-110	240	27.36	nucl	8.19	-0.713	74.22	unstable
Pgl_GLEAN_10026254	PgMYB108	MYB-R2R3	Chr4	14946705	14957428	+	10723	1140	2	2	152-202; 205-253	380	43.1715	nucl	9.19	-0.674	54.24	unstable
Pgl_GLEAN_10025439	PgMYB109	MYB-R2R3	Chr4	21915818	21918475	+	2657	1335		undefined
Pgl_GLEAN_10030874	PgMYB110	MYB-related	Chr4	55518487	55523094	+	4607	1023		undefined
Pgl_GLEAN_10030875	PgMYB111	MYB-R2R3	Chr4	55528138	55530117	-	1979	1020	4	2	13-63; 66-114	340	37.0606	nucl	5.5	-0.493	64.13	unstable
Pgl_GLEAN_10027372	PgMYB112	MYB-related	Chr4	60096525	60098621	-	2096	864	8	1	17-67	288	30.779	nucl	6.16	-0.325	69.42	unstable
Pgl_GLEAN_10023931	PgMYB113	MYB-related	Chr4	62891728	62901059	-	9331	2241	3	1	51-99	747	81.9519	nucl	5.98	-0.823	49.2	unstable
Pgl_GLEAN_10031352	PgMYB114	MYB-R2R3	Chr4	73303376	73304606	-	1230	984	3	2	13-64; 67-115	328	35.105	nucl	5.66	-0.488	48.18	unstable
Pgl_GLEAN_10035466	PgMYB115	MYB-R2R3	Chr4	104614175	104616247	+	2072	954	3	2	13-64; 67-115	318	35.5279	nucl	8.18	-0.715	55.42	unstable
Pgl_GLEAN_10011393	PgMYB116	MYB-R2R3	Chr4	109073033	109074647	+	1614	969	3	2	14-64; 67-115	323	35.4781	nucl	8.33	-0.594	68.97	unstable
Pgl_GLEAN_10030833	PgMYB117	MYB-R2R3	Chr4	116647270	116648339	+	1069	468	2	2	6-55; 58-105	156	17.9154	nucl	5.55	-0.908	26.84	stable
Pgl_GLEAN_10010676	PgMYB118	MYB-R2R3	Chr4	117024393	117025586	+	1193	1002		undefined
Pgl_GLEAN_10037578	PgMYB119	MYB-R2R3	Chr4	121139005	121140827	+	1822	807	2	2	19-68; 71-119	269	29.4168	nucl	9.84	-0.643	58.89	unstable
Pgl_GLEAN_10034301	PgMYB120	MYB-R2R3	Chr4	140810373	140811158	+	785	783	1	2	13-63; 66-114	261	28.6989	nucl	8.43	-0.522	46.07	unstable
Pgl_GLEAN_10034291	PgMYB121	MYB-R2R3	Chr4	141183101	141185105	+	2004	786	2	2	13-63; 66-114	262	29.0416	nucl	6.66	-0.73	49.46	unstable
Pgl_GLEAN_10015816	PgMYB122	MYB-R2R3	Chr4	150236387	150237263	-	876	624	3	2	12-62; 65-113	208	23.9329	nucl	7.65	-0.857	57.73	unstable
Pgl_GLEAN_10018451	PgMYB123	MYB-related	Chr4	172584414	172590247	+	5833	2238	9	1	379-427	746	81.3347	nucl	6.3	-0.382	50.57	unstable
Pgl_GLEAN_10033016	PgMYB124	MYB-R2R3	Chr4	175094529	175096819	-	2290	429	3	2	13-63; 66-111	143	16.3699	nucl	9.36	-0.569	50.38	unstable
Pgl_GLEAN_10029589	PgMYB125	MYB-related	Chr5	17783534	17790254	+	6720	3237	5	2	256-304; 450-498	1079	117.215	nucl	5.34	-0.536	51.54	unstable
Pgl_GLEAN_10009748	PgMYB126	MYB-R2R3	Chr5	33613428	33616783	-	3355	1296	2	2	72-122; 125-173	432	48.1312	nucl	4.66	-0.763	58.81	unstable
Pgl_GLEAN_10011359	PgMYB127	MYB-related	Chr5	45438179	45444880	-	6701	2478	8	1	266-315	826	90.3272	nucl	4.82	-0.432	45.52	unstable
Pgl_GLEAN_10021337	PgMYB128	MYB-related	Chr5	54588658	54589967	+	1309	879	2	1	124-174	293	33.0631	cyto	9.12	-0.486	31.24	stable
Pgl_GLEAN_10007629	PgMYB129	MYB-related	Chr5	69761871	69764398	+	2527	1008	6	0	none	336	36.4552	nucl	7.85	-0.544	40.53	unstable
Pgl_GLEAN_10018726	PgMYB130	MYB-related	Chr5	71218505	71224517	-	6012	846	8	1	28-76	282	31.139	nucl	7.06	-0.602	56.09	unstable
Pgl_GLEAN_10018730	PgMYB131	MYB-related	Chr5	71261073	71263189	+	2116	711	5	0	none	237	26.4736	nucl	7.09	-0.658	74.09	unstable
Pgl_GLEAN_10026117	PgMYB132	MYB-R2R3	Chr5	74695424	74697000	-	1576	1266	3	2	20-70; 73-121	422	45.1063	nucl	6.72	-0.586	61.96	unstable
Pgl_GLEAN_10038507	PgMYB133	MYB-related	Chr5	80929335	80931746	+	2411	1419	7	0	none	473	51.9236	nucl	5.56	-0.727	69.14	unstable
Pgl_GLEAN_10021771	PgMYB134	MYB-related	Chr5	99603046	99604465	-	1419	816	5	1	87-137	272	29.6815	nucl	9.32	-0.572	55.37	unstable
Pgl_GLEAN_10001215	PgMYB135	MYB-related	Chr5	100219849	100222160	+	2311	945	3	1	90-140	315	34.053	chlo	6.51	-0.578	63.33	unstable
Pgl_GLEAN_10003870	PgMYB136	MYB-related	Chr5	106827781	106829655	+	1874	750	6	0	none	250	28.2688	nucl	9.52	-0.723	49.92	unstable
Pgl_GLEAN_10034383	PgMYB137	MYB-R2R3	Chr5	115971950	115973798	+	1848	774	3	2	13-63; 66-114	258	28.4644	nucl	6.05	-0.48	50.41	unstable
Pgl_GLEAN_10024859	PgMYB138	MYB-R2R3	Chr5	120455141	120456053	-	912	642	2	2	13-63; 66-114	214	23.5758	nucl	8.91	-0.633	51.92	unstable
Pgl_GLEAN_10024824	PgMYB139	MYB-R2R3	Chr5	121391288	121392666	+	1378	525	4	2	14-64; 67-107	175	19.3697	nucl	6.43	-0.527	63.83	unstable
Pgl_GLEAN_10015206	PgMYB140	MYB-related	Chr5	124674930	124676977	-	2047	1053	6	0	none	351	39.0251	chlo	6.6	-0.638	53.93	unstable
Pgl_GLEAN_10026185	PgMYB141	MYB-R2R3	Chr5	126859479	126860936	+	1457	972	2	2	19-69; 72-120	324	35.9149	nucl	5.36	-0.572	61.73	unstable
Pgl_GLEAN_10009674	PgMYB142	MYB-related	Chr5	128477805	128481179	+	3374	1293	7	1	none	431	47.2908	nucl	5.45	-0.668	58.04	unstable
Pgl_GLEAN_10030123	PgMYB143	MYB-R2R3	Chr5	130233276	130241950	+	8674	1077		undefined
Pgl_GLEAN_10014494	PgMYB144	MYB-related	Chr5	137252839	137253461	+	622	219	2	0	none	73	7.46746	nucl	6.54	-0.244	33.3	stable
Pgl_GLEAN_10023408	PgMYB145	MYB-related	Chr5	138360524	138367951	-	7427	2475	16	1	48-96	825	91.1207	cyto	7.03	-0.522	42.69	unstable
Pgl_GLEAN_10024234	PgMYB146	MYB-R2R3	Chr5	139121390	139122136	-	746	744	1	2	24-73; 77-125	248	26.7055	nucl	8.39	-0.248	53.51	unstable
Pgl_GLEAN_10014410	PgMYB147	MYB-related	Chr5	141218324	141222976	-	4652	2067	5	0	none	689	74.0061	nucl	6.32	-0.461	50.7	unstable
Pgl_GLEAN_10009509	PgMYB148	MYB-R2R3	Chr5	153816437	153817649	+	1212	732	3	2	14-64; 67-115	244	28.0784	nucl	6.55	-0.862	73.28	unstable
Pgl_GLEAN_10037679	PgMYB149	MYB-related	Chr5	154904694	154907779	-	3085	1161	5	0	none	387	42.2433	chlo	10.05	-0.615	72.47	unstable
Pgl_GLEAN_10001419	PgMYB150	MYB-related	Chr6	1913459	1914262	+	803	801		undefined
Pgl_GLEAN_10022172	PgMYB151	MYB-R2R3	Chr6	4151620	4152568	-	948	801	2	2	16-66; 69-117	267	28.6967	nucl	8.83	-0.597	47.28	unstable
Pgl_GLEAN_10022161	PgMYB152	MYB-related	Chr6	4306302	4306577	-	275	273	1	1	9-61	91	10.1976	chlo	9.13	-0.634	82.57	unstable
Pgl_GLEAN_10022160	PgMYB153	MYB-related	Chr6	4322908	4323210	-	302	300	1	1	13-66	100	11.5947	nucl	8.21	-0.993	93.06	unstable
Pgl_GLEAN_10010463	PgMYB154	MYB-related	Chr6	21165723	21169107	+	3384	1728	5	0	none	576	64.5854	nucl	5.07	-0.402	48.92	unstable
Pgl_GLEAN_10031693	PgMYB155	MYB-related	Chr6	26091126	26092739	-	1613	354	2	1	13-63	118	13.4888	nucl	9.53	-0.571	31.84	stable
Pgl_GLEAN_10020208	PgMYB156	MYB-related	Chr6	29277887	29278736	-	849	324	2	1	30-88	108	12.496	cyto	10.61	-0.866	40.1	unstable
Pgl_GLEAN_10020166	PgMYB157	MYB-R2R3	Chr6	30054880	30060540	-	5660	1410	3	2	114-163; 167-215	470	51.1186	nucl	4.78	-0.533	65.29	unstable
Pgl_GLEAN_10032441	PgMYB158	MYB-related	Chr6	31625223	31626077	+	854	741	2	2	36-88; 141-191	247	27.5238	nucl	8.63	-0.73	63.84	unstable
Pgl_GLEAN_10032472	PgMYB159	MYB-R2R3	Chr6	32515311	32516764	+	1453	1215	2	2	95-144; 147-195	405	43.4303	nucl	5.54	-0.568	59.6	unstable
Pgl_GLEAN_10007906	PgMYB160	MYB-related	Chr6	32873783	32884096	+	10313	3615	10	0	none	1205	131.036	nucl	5.89	-0.485	52.56	unstable
Pgl_GLEAN_10005529	PgMYB161	MYB-R2R3	Chr6	34150962	34156255	-	5293	1683	6	2	115-164; 167-215	561	60.5562	nucl	8.5	-0.481	43.36	unstable
Pgl_GLEAN_10037254	PgMYB162	MYB-R2R3	Chr6	44081902	44084574	-	2672	1653	3	2	42-92; 95-143	551	59.318	nucl	5.15	-0.454	54.69	unstable
Pgl_GLEAN_10037339	PgMYB163	MYB-R2R3	Chr6	64792353	64793590	-	1237	741	4	2	13-64; 67-115	247	27.1592	nucl	5.77	-0.646	59.24	unstable
Pgl_GLEAN_10024574	PgMYB164	MYB-R2R3	Chr6	69960865	69962449	-	1584	963	4	2	13-63; 66-114	321	34.0905	nucl	7.15	-0.216	44	unstable
Pgl_GLEAN_10012285	PgMYB165	MYB-related	Chr6	70936081	70941636	-	5555	867	6	1	4-59	289	31.6069	nucl	9.47	-0.75	59.49	unstable
Pgl_GLEAN_10020860	PgMYB166	MYB-R2R3	Chr6	74057608	74058689	+	1081	945	2	2	19-69; 72-120	315	34.339	nucl	5.95	-0.566	60.99	unstable
Pgl_GLEAN_10036366	PgMYB167	MYB-R2R3	Chr6	76271038	76271964	-	926	654	3	2	20-70; 73-121	218	23.5693	nucl	6.43	-0.644	42.93	unstable
Pgl_GLEAN_10032520	PgMYB168	MYB-R2R3	Chr6	79346725	79347872	+	1147	753	3	2	13-64; 67-115	251	27.6613	nucl	9.07	-0.59	54.88	unstable
Pgl_GLEAN_10023913	PgMYB169	MYB-related	Chr6	87236926	87237192	+	266	264	1	1	14-67	88	10.0762	cyto	8.01	-1.007	74.62	unstable
Pgl_GLEAN_10022186	PgMYB170	MYB-R2R3	Chr6	88007335	88007812	+	477	390	2	2	13-63; 66-114	130	14.5035	nucl	10.22	-0.653	42.11	unstable
Pgl_GLEAN_10009281	PgMYB171	MYB-related	Chr6	108023846	108025756	-	1910	543	3	1	132-180	181	20.3507	cyto	5.63	-0.865	46.41	unstable
Pgl_GLEAN_10009833	PgMYB172	MYB-related	Chr6	117624123	117627064	-	2941	984	5	1	4-87	328	35.2894	nucl	8.54	-0.283	34.04	stable
Pgl_GLEAN_10035445	PgMYB173	MYB-R2R3	Chr6	167642039	167643369	+	1330	984	3	2	14-64; 67-115	328	35.8277	nucl	5.87	-0.603	55.97	unstable
Pgl_GLEAN_10022280	PgMYB174	MYB-R2R3	Chr6	184262794	184266876	-	4082	1005		undefined
Pgl_GLEAN_10030436	PgMYB175	MYB-R2R3	Chr6	186179952	186180881	-	929	927	1	2	31-81; 84-132	309	33.4041	nucl	5.39	-0.396	61.22	unstable
Pgl_GLEAN_10020214	PgMYB176	MYB-related	Chr6	189864101	189865006	+	905	459	3	1	72-122	153	16.7199	cyto	9.77	-0.672	50.99	unstable
Pgl_GLEAN_10010138	PgMYB177	MYB-R2R3	Chr6	190788488	190789969	+	1481	1269	3	2	13-63; 66-114	423	46.9695	nucl	6.51	-0.662	62.38	unstable
Pgl_GLEAN_10014000	PgMYB178	MYB-R2R3	Chr6	199563038	199569338	-	6300	843	3	2	48-97; 100-142	281	29.9103	nucl	9.03	-0.473	71.93	unstable
Pgl_GLEAN_10014001	PgMYB179	MYB-R2R3	Chr6	199646499	199647552	+	1053	933	2	2	64-113; 116-164	311	34.106	nucl	8.66	-0.605	62.88	unstable
Pgl_GLEAN_10014003	PgMYB180	MYB-R2R3	Chr6	199744297	199745814	+	1517	774	4	2	56-105; 209-232	258	28.2614	nucl	8.69	-0.63	59.66	unstable
Pgl_GLEAN_10030557	PgMYB181	MYB-R2R3	Chr6	216479281	216480633	-	1352	777	4	2	17-67; 70-118	259	28.6256	nucl	6.94	-0.415	44.23	unstable
Pgl_GLEAN_10007566	PgMYB182	MYB-related	Chr6	219298567	219300114	-	1547	927	3	2	26-77; 139-189	309	34.1413	nucl	8.68	-0.669	51.09	unstable
Pgl_GLEAN_10004547	PgMYB183	MYB-related	Chr6	225667939	225669521	-	1582	843	8	1	24-72	281	30.5937	nucl	9.21	-0.407	50.99	unstable
Pgl_GLEAN_10016246	PgMYB184	MYB-related	Chr6	226495017	226497467	+	2450	909	6	1	4-59	303	32.9873	nucl	8.49	-0.489	40.79	unstable
Pgl_GLEAN_10028933	PgMYB185	MYB-related	Chr6	227310821	227311711	-	890	669	2	1	40-88	223	24.3383	nucl	7.63	-0.562	83.91	unstable
Pgl_GLEAN_10028934	PgMYB186	MYB-R2R3	Chr6	227321640	227322716	+	1076	822	3	2	15-65; 68-116	274	29.1975	nucl	8.12	-0.454	60.98	unstable
Pgl_GLEAN_10024668	PgMYB187	MYB-related	Chr6	231798060	231799103	-	1043	783	3	1	3-53	261	28.8247	nucl	5.78	-0.45	71.57	unstable
Pgl_GLEAN_10024648	PgMYB188	MYB-R2R3	Chr6	232180107	232181053	-	946	708		undefined
Pgl_GLEAN_10024645	PgMYB189	MYB-related	Chr6	232325639	232327559	-	1920	822	3	1	117-167	274	29.1069	chlo	9.95	-0.464	58.56	unstable
Pgl_GLEAN_10036207	PgMYB190	MYB-related	Chr6	233953452	233954524	+	1072	675	3	1	93-136	225	25.4179	nucl	7.78	-0.509	50.26	unstable
Pgl_GLEAN_10001965	PgMYB191	MYB-R2R3	Chr7	135966	136955	+	989	684	3	2	22-72; 75-123	228	25.4485	nucl	5.84	-0.608	56.01	unstable
Pgl_GLEAN_10000710	PgMYB192	MYB-related	Chr7	730454	732722	-	2268	864	3	0	none	288	30.679	nucl	6.22	-0.656	56.46	unstable
Pgl_GLEAN_10015650	PgMYB193	MYB-R2R3	Chr7	6539265	6540649	-	1384	1005	3	2	13-63; 66-114	335	35.8547	nucl	5.57	-0.567	61.93	unstable
Pgl_GLEAN_10013323	PgMYB194	MYB-R2R3	Chr7	7259862	7261069	+	1207	999		undefined
Pgl_GLEAN_10013308	PgMYB195	MYB-R2R3	Chr7	7560160	7564132	+	3972	2025	14	2	20-69; 72-120	675	74.4065	nucl	4.92	-0.728	53.91	unstable
Pgl_GLEAN_10016493	PgMYB196	MYB-related	Chr7	19593821	19594830	+	1009	819	2	1	142-191	273	29.7914	nucl	5.33	-0.616	68.9	unstable
Pgl_GLEAN_10015781	PgMYB197	MYB-R2R3	Chr7	21036167	21038191	+	2024	882	4	2	13-63; 66-114	294	31.8817	nucl	6.79	-0.534	47.7	unstable
Pgl_GLEAN_10013916	PgMYB198	MYB-R2R3	Chr7	32400720	32402099	-	1379	1143	3	2	12-62; 65-113	381	40.3166	nucl	6.34	-0.317	49.8	unstable
Pgl_GLEAN_10001403	PgMYB199	MYB-R2R3	Chr7	38914397	38915278	-	881	771	2	2	13-63; 66-114	257	28.4989	nucl	8.99	-0.443	45.2	unstable
Pgl_GLEAN_10019811	PgMYB200	MYB-R2R3	Chr7	44995914	44999997	+	4083	849	2	2	13-63; 66-114	283	30.5682	nucl	5.82	-0.475	51.21	unstable
Pgl_GLEAN_10010237	PgMYB201	MYB-related	Chr7	57979646	57982697	-	3051	939	6	0	none	313	34.0544	nucl	5.76	-0.863	49.49	unstable
Pgl_GLEAN_10029681	PgMYB202	MYB-related	Chr7	68717409	68718324	-	915	642	3	1	122-172	214	24.8786	nucl	6.59	-0.918	26.49	stable
Pgl_GLEAN_10029677	PgMYB203	MYB-related	Chr7	69252204	69253297	+	1093	876	2	1	120-170	292	32.6946	nucl	9.34	-0.699	37.85	stable
Pgl_GLEAN_10019884	PgMYB204	Atypical MYB genes	Chr7	111509902	111516281	+	6379	3240	14	5	291-387; 390-440; 443-491; 495-544; 547-596	1080	120.262	nucl	9.31	-0.654	54.25	unstable
Pgl_GLEAN_10021694	PgMYB205	MYB-related	Chr7	118162049	118166438	+	4389	1263	8	0	none	421	45.8101	chlo	5.04	-0.574	53.99	unstable
Pgl_GLEAN_10016742	PgMYB206	MYB-R2R3	Chr7	120784959	120785738	+	779	777	1	2	13-63; 66-114	259	28.6173	nucl	5.89	-0.486	52.74	unstable
Pgl_GLEAN_10016741	PgMYB207	MYB-R2R3	Chr7	120932077	120933029	+	952	843	2	2	13-63; 66-114	281	31.1971	nucl	5.25	-0.596	55.55	unstable
Pgl_GLEAN_10016737	PgMYB208	MYB-R2R3	Chr7	121099068	121099910	+	842	840	1	2	13-63; 66-114	280	30.8969	nucl	5.17	-0.47	48.49	unstable
a Molecular weight, pI, GRAVY, Instability index arepredicted by ProtParam (https://www.expasy.org/resources/protparam) online program.
b Subcellular localization is predicted by WoLF PSORT (https://wolfpsort.hgc.jp/).
c Stability, Instability index < 40, stable; Instability index > 40, unstable
d Undefined indicates the genome sequence of the PgMYB candidate in the resource database (https://cegsb.icrisat.org/ipmgsc/) is incomplete.
