# Supplementary material for: Genome-Wide Identification and Transcriptional Analysis of the MYB Gene Family in Pearl Millet (Pennisetum glaucum)
Source: Int J Mol Sci. 2023 Jan 27;24(3):2484. doi: 10.3390/ijms24032484 (PMC9916650; doi:10.3390/ijms24032484)
Supplement: Supplementary file 1 [file ijms-24-02484-s001.zip › Table S3. The Ka_Ks ratios for orthologous PgMYB genes between Pennisetum glaucum and Brachypodium distachyon.xlsx]

## Sheet: Sheet1
Table S3. The Ka/Ks ratios for orthologous PgMYB genes between Pennisetum glaucum and Brachypodium distachyon
Location on Pennisetum glaucum genome					Location on Brachypodium distachyon genome
No. Chr	Gene ID	Gene Name	Start	End	No.Chr	Gene ID	Start	End	Ka	Ks	Ka_Ks
Chr1	Pgl_GLEAN_10018773	PgMYB11	183947465	183947731	Chr2	Bradi2g24400	22196004	22197808	0.0381924	0.375831	0.101621
Chr1	Pgl_GLEAN_10018773	PgMYB11	183947465	183947731	Chr2	Bradi2g56520	54633245	54634639	0.0433241	0.328138	0.13203
Chr1	Pgl_GLEAN_10027640	PgMYB13	193265982	193266996	Chr2	Bradi2g23710	21398454	21400574	0.138088	0.412247	0.334965
Chr1	Pgl_GLEAN_10025716	PgMYB14	197223702	197229892	Chr2	Bradi2g23310	20850601	20860279	0.26225	0.533522	0.491546
Chr1	Pgl_GLEAN_10025716	PgMYB14	197223702	197229892	Chr2	Bradi2g54640	53279393	53286257	0.32394	0.877991	0.368956
Chr1	Pgl_GLEAN_10035698	PgMYB15	206068521	206070325	Chr1	Bradi1g63690	63138558	63143357	0.341589	3.59033	0.0951413
Chr1	Pgl_GLEAN_10035698	PgMYB15	206068521	206070325	Chr2	Bradi2g21880	19217697	19220497	0.103009	0.591835	0.17405
Chr1	Pgl_GLEAN_10013674	PgMYB16	225721911	225723025	Chr2	Bradi2g17982	15994110	15996164	0.248846	0.511155	0.486831
Chr1	Pgl_GLEAN_10013674	PgMYB16	225721911	225723025	Chr2	Bradi2g47590	47759404	47761057	0.232534	0.649177	0.358198
Chr1	Pgl_GLEAN_10011787	PgMYB18	232114066	232115149	Chr2	Bradi2g16120	14196431	14197945	0.134141	1.11688	0.120104
Chr1	Pgl_GLEAN_10011787	PgMYB18	232114066	232115149	Chr2	Bradi2g45770	45966480	45967696	0.209654	1.48162	0.141504
Chr1	Pgl_GLEAN_10011958	PgMYB20	237855754	237856470	Chr2	Bradi2g42870	43073035	43074800	0.341186	1.05289	0.324046
Chr1	Pgl_GLEAN_10027871	PgMYB21	241765297	241766737	Chr2	Bradi2g05760	4244609	4246642	0.234618	0.875517	0.267977
Chr1	Pgl_GLEAN_10029419	PgMYB22	252841481	252843058	Chr2	Bradi2g36730	36807156	36808680	0.0549373	0.497471	0.110433
Chr1	Pgl_GLEAN_10029419	PgMYB22	252841481	252843058	Chr2	Bradi2g11080	9280376	9282653	0.144412	0.961854	0.150139
Chr1	Pgl_GLEAN_10005876	PgMYB23	254795399	254796970	Chr2	Bradi2g11430	9713159	9714347	0.21062	0.92771	0.227033
Chr1	Pgl_GLEAN_10005876	PgMYB23	254795399	254796970	Chr2	Bradi2g38560	38598539	38600141	0.105809	0.83133	0.127277
Chr1	Pgl_GLEAN_10021026	PgMYB24	255881990	255888985	Chr2	Bradi2g38160	38268017	38274462	0.235475	0.715103	0.329288
Chr1	Pgl_GLEAN_10021620	PgMYB25	258113995	258114905	Chr2	Bradi2g62510	58910348	58912149	0.440643	1.17577	0.374771
Chr1	Pgl_GLEAN_10025141	PgMYB2	2587119	2590232	Chr4	Bradi4g04627	3812082	3814267	0.327704	0.829214	0.395198
Chr1	Pgl_GLEAN_10011717	PgMYB28	263118850	263131389	Chr2	Bradi2g07677	6032220	6042052	0.346942	1.03836	0.334125
Chr1	Pgl_GLEAN_10011717	PgMYB28	263118850	263131389	Chr2	Bradi2g31887	31618450	31625963	0.237192	0.717296	0.330675
Chr1	Pgl_GLEAN_10038213	PgMYB29	270595969	270601579	Chr4	Bradi4g41230	45318733	45326202	0.143597	0.622794	0.230569
Chr1	Pgl_GLEAN_10038222	PgMYB30	270683805	270684526	Chr4	Bradi4g41277	45359990	45361334	0.20031	0.587697	0.340838
Chr1	Pgl_GLEAN_10038222	PgMYB30	270683805	270684526	Chr4	Bradi4g23967	28859848	28861371	0.151679	0.560545	0.270592
Chr1	Pgl_GLEAN_10009918	PgMYB32	274900694	274901836	Chr4	Bradi4g26180	31377769	31379164	0.226494	0.709161	0.319383
Chr1	Pgl_GLEAN_10009918	PgMYB32	274900694	274901836	Chr4	Bradi4g43937	47441690	47443534	0.23498	0.69834	0.336483
Chr1	Pgl_GLEAN_10019982	PgMYB3	52231622	52232874	Chr4	Bradi4g16290	17106271	17108424	0.181892	0.688398	0.264225
Chr1	Pgl_GLEAN_10034693	PgMYB4	75861241	75869466	Chr3	Bradi3g37047	39148638	39150605	0.395925	0.760764	0.52043
Chr1	Pgl_GLEAN_10034693	PgMYB4	75861241	75869466	Chr4	Bradi4g30220	35798578	35800463	0.405707	0.845147	0.480043
Chr1	Pgl_GLEAN_10034717	PgMYB6	76658830	76660519	Chr3	Bradi3g36660	38792995	38795311	0.108587	0.596744	0.181966
Chr1	Pgl_GLEAN_10031720	PgMYB7	79574293	79575500	Chr3	Bradi3g36370	38406000	38407563	0.231766	0.396867	0.583989
Chr1	Pgl_GLEAN_10031720	PgMYB7	79574293	79575500	Chr4	Bradi4g29796	35331216	35332874	0.269955	0.754377	0.357851
Chr2	Pgl_GLEAN_10028194	PgMYB55	105210328	105211447	Chr1	Bradi1g45510	43881552	43883118	0.152551	0.666521	0.228876
Chr2	Pgl_GLEAN_10028194	PgMYB55	105210328	105211447	Chr3	Bradi3g58770	57919592	57921163	0.217179	1.30764	0.166085
Chr2	Pgl_GLEAN_10023444	PgMYB36	11364070	11369344	Chr1	Bradi1g08470	5978218	5982774	0.0654063	0.72459	0.0902666
Chr2	Pgl_GLEAN_10032646	PgMYB57	120285067	120286075	Chr1	Bradi1g44070	42315955	42317104	0.164851	0.46227	0.356613
Chr2	Pgl_GLEAN_10002927	PgMYB37	15881959	15883302	Chr1	Bradi1g10470	7545061	7547049	0.0839898	0.850352	0.0987706
Chr2	Pgl_GLEAN_10023164	PgMYB59	184327994	184329956	Chr3	Bradi3g10075	8252520	8256978	0.385609	0.780245	0.494215
Chr2	Pgl_GLEAN_10023163	PgMYB60	184393490	184399542	Chr3	Bradi3g10067	8238894	8242428	0.314788	0.535131	0.588244
Chr2	Pgl_GLEAN_10037977	PgMYB61	194567818	194569963	Chr3	Bradi3g09160	7284075	7287178	0.266654	0.778719	0.342427
Chr2	Pgl_GLEAN_10017572	PgMYB63	213768147	213771923	Chr3	Bradi3g06870	5076211	5081483	0.163516	0.753252	0.21708
Chr2	Pgl_GLEAN_10016698	PgMYB64	217974037	217978016	Chr1	Bradi1g30801	26200816	26204151	0.594674	1.35615	0.4385
Chr2	Pgl_GLEAN_10016698	PgMYB64	217974037	217978016	Chr3	Bradi3g06120	4416457	4421634	0.134402	0.602183	0.223192
Chr2	Pgl_GLEAN_10027845	PgMYB65	222878707	222880650	Chr1	Bradi1g31837	27391758	27395029	0.179863	0.957482	0.18785
Chr2	Pgl_GLEAN_10027845	PgMYB65	222878707	222880650	Chr3	Bradi3g05500	3878311	3882524	0.164976	0.593954	0.277759
Chr2	Pgl_GLEAN_10020538	PgMYB66	236248342	236250458	Chr1	Bradi1g34470	30155727	30159061	0.299977	1.44303	0.20788
Chr2	Pgl_GLEAN_10020538	PgMYB66	236248342	236250458	Chr3	Bradi3g03538	2329882	2333626	0.236552	0.747688	0.316378
Chr2	Pgl_GLEAN_10013105	PgMYB40	28088750	28091314	Chr1	Bradi1g13879	10726749	10729584	0.196443	0.672204	0.292236
Chr2	Pgl_GLEAN_10013105	PgMYB40	28088750	28091314	Chr4	Bradi4g01770	1160120	1164736	0.204906	1.60026	0.128045
Chr2	Pgl_GLEAN_10031141	PgMYB42	36591916	36594448	Chr1	Bradi1g15581	12490498	12493887	0.293924	0.491124	0.598472
Chr2	Pgl_GLEAN_10021657	PgMYB43	43401652	43403095	Chr3	Bradi3g30033	31802692	31804657	0.276466	0.949123	0.291285
Chr2	Pgl_GLEAN_10004603	PgMYB44	47464253	47464684	Chr3	Bradi3g28830	30199702	30202272	0.126855	0.474126	0.267555
Chr2	Pgl_GLEAN_10004603	PgMYB44	47464253	47464684	Chr3	Bradi3g49180	50308964	50310391	0.192405	0.343931	0.559427
Chr2	Pgl_GLEAN_10004603	PgMYB44	47464253	47464684	Chr5	Bradi5g15760	19317599	19320187	0.203838	0.481064	0.423724
Chr2	Pgl_GLEAN_10011452	PgMYB46	53257854	53258328	Chr3	Bradi3g27663	28420817	28427343	0.355668	1.22312	0.290787
Chr2	Pgl_GLEAN_10022854	PgMYB34	8374146	8375336	Chr1	Bradi1g07260	5071582	5073164	0.1056	0.678557	0.155624
Chr2	Pgl_GLEAN_10029006	PgMYB50	88036698	88038188	Chr1	Bradi1g48002	46793696	46795422	0.547427	3.40923	0.160572
Chr2	Pgl_GLEAN_10029495	PgMYB51	90670801	90676646	Chr1	Bradi1g47557	46366256	46368521	0.121207	0.574251	0.211069
Chr3	Pgl_GLEAN_10012406	PgMYB72	13130719	13131887	Chr1	Bradi1g45510	43881552	43883118	0.193255	1.0168	0.190063
Chr3	Pgl_GLEAN_10012406	PgMYB72	13130719	13131887	Chr3	Bradi3g58770	57919592	57921163	0.0907961	0.565724	0.160496
Chr3	Pgl_GLEAN_10003205	PgMYB84	148681995	148689668	Chr2	Bradi2g07677	6032220	6042052	0.245053	0.717835	0.341377
Chr3	Pgl_GLEAN_10031135	PgMYB68	1588548	1590568	Chr3	Bradi3g55120	55215317	55217751	0.347294	0.570453	0.608804
Chr3	Pgl_GLEAN_10012225	PgMYB73	16546883	16547771	Chr1	Bradi1g44070	42315955	42317104	0.17716	0.653908	0.270924
Chr3	Pgl_GLEAN_10012225	PgMYB73	16546883	16547771	Chr3	Bradi3g56917	56390411	56392347	0.0972798	0.45952	0.211699
Chr3	Pgl_GLEAN_10010553	PgMYB87	230874042	230876313	Chr3	Bradi3g46910	48402919	48405798	0.194011	0.386301	0.502227
Chr3	Pgl_GLEAN_10010553	PgMYB87	230874042	230876313	Chr5	Bradi5g12417	16034685	16037607	0.0692355	0.35516	0.194942
Chr3	Pgl_GLEAN_10012731	PgMYB89	238496740	238498133	Chr5	Bradi5g13041	16741784	16743557	0.0529392	0.331591	0.159652
Chr3	Pgl_GLEAN_10018370	PgMYB90	253450474	253452242	Chr3	Bradi3g48886	50082301	50083972	0.20411	0.955703	0.21357
Chr3	Pgl_GLEAN_10018370	PgMYB90	253450474	253452242	Chr5	Bradi5g15246	18746110	18749535	0.149703	0.689259	0.217194
Chr3	Pgl_GLEAN_10035636	PgMYB91	256272527	256273940	Chr3	Bradi3g49180	50308964	50310391	0.254069	0.771943	0.329129
Chr3	Pgl_GLEAN_10035636	PgMYB91	256272527	256273940	Chr5	Bradi5g15760	19317599	19320187	0.179185	0.428456	0.418211
Chr3	Pgl_GLEAN_10008203	PgMYB74	25676997	25678321	Chr3	Bradi3g52260	52982172	52984203	0.222739	0.514245	0.433138
Chr3	Pgl_GLEAN_10008203	PgMYB74	25676997	25678321	Chr5	Bradi5g20130	23176868	23178723	0.329051	0.673362	0.488668
Chr3	Pgl_GLEAN_10003061	PgMYB92	260702446	260703687	Chr3	Bradi3g49987	50962137	50964319	0.156129	0.413693	0.377402
Chr3	Pgl_GLEAN_10003061	PgMYB92	260702446	260703687	Chr5	Bradi5g16707	20150724	20152638	0.200563	0.448392	0.447295
Chr3	Pgl_GLEAN_10003063	PgMYB93	260772760	260774965	Chr3	Bradi3g49970	50944674	50947769	0.216026	0.709981	0.30427
Chr3	Pgl_GLEAN_10003063	PgMYB93	260772760	260774965	Chr5	Bradi5g16672	20129691	20132377	0.122245	0.411202	0.297286
Chr3	Pgl_GLEAN_10027659	PgMYB75	27229177	27231397	Chr3	Bradi3g51960	52692047	52695642	0.242742	0.758652	0.319965
Chr3	Pgl_GLEAN_10027659	PgMYB75	27229177	27231397	Chr5	Bradi5g19380	22534488	22538285	0.3768	1.45902	0.258255
Chr3	Pgl_GLEAN_10033575	PgMYB94	272420804	272422298	Chr5	Bradi5g17600	20990441	20992433	0.234001	0.597584	0.391578
Chr3	Pgl_GLEAN_10018049	PgMYB96	278678155	278681210	Chr3	Bradi3g51409	52235512	52239208	0.375974	0.940044	0.399954
Chr3	Pgl_GLEAN_10018049	PgMYB96	278678155	278681210	Chr5	Bradi5g18590	21810720	21814476	0.243402	0.60148	0.404672
Chr3	Pgl_GLEAN_10027682	PgMYB76	28080709	28084771	Chr3	Bradi3g51757	52535413	52539763	0.0826361	0.505605	0.16344
Chr3	Pgl_GLEAN_10022511	PgMYB97	282395600	282397845	Chr3	Bradi3g51960	52692047	52695642	0.405713	1.02243	0.396812
Chr3	Pgl_GLEAN_10022511	PgMYB97	282395600	282397845	Chr5	Bradi5g19380	22534488	22538285	0.269551	0.869363	0.310055
Chr3	Pgl_GLEAN_10023805	PgMYB98	285681859	285682510	Chr5	Bradi5g20051	23099119	23100828	0.125225	0.307516	0.407216
Chr3	Pgl_GLEAN_10023817	PgMYB99	285885710	285887095	Chr3	Bradi3g52260	52982172	52984203	0.327108	0.555547	0.588804
Chr3	Pgl_GLEAN_10023817	PgMYB99	285885710	285887095	Chr5	Bradi5g20130	23176868	23178723	0.213564	0.390846	0.546416
Chr3	Pgl_GLEAN_10004210	PgMYB100	286573502	286575753	Chr3	Bradi3g52500	53154648	53159773	0.217659	1.2793	0.170139
Chr3	Pgl_GLEAN_10004210	PgMYB100	286573502	286575753	Chr5	Bradi5g20520	23550124	23553200	0.184525	0.530107	0.348091
Chr3	Pgl_GLEAN_10031924	PgMYB102	299679876	299682059	Chr5	Bradi5g25320	26866241	26868928	0.312058	0.558371	0.558871
Chr3	Pgl_GLEAN_10031849	PgMYB103	300773715	300776344	Chr5	Bradi5g26110	27388263	27391456	0.0761182	0.580033	0.131231
Chr3	Pgl_GLEAN_10002978	PgMYB69	3383904	3387612	Chr3	Bradi3g60220	58991243	58993855	0.317595	0.859252	0.369618
Chr3	Pgl_GLEAN_10029306	PgMYB77	39068797	39070303	Chr3	Bradi3g49987	50962137	50964319	0.16276	0.276015	0.589679
Chr3	Pgl_GLEAN_10029306	PgMYB77	39068797	39070303	Chr5	Bradi5g16707	20150724	20152638	0.199164	0.468161	0.425418
Chr3	Pgl_GLEAN_10029303	PgMYB78	39139785	39142393	Chr3	Bradi3g49970	50944674	50947769	0.134223	0.618629	0.216969
Chr3	Pgl_GLEAN_10029303	PgMYB78	39139785	39142393	Chr5	Bradi5g16672	20129691	20132377	0.158554	0.551803	0.287338
Chr3	Pgl_GLEAN_10027268	PgMYB80	47927271	47928520	Chr3	Bradi3g48886	50082301	50083972	0.211121	0.475781	0.443736
Chr3	Pgl_GLEAN_10027268	PgMYB80	47927271	47928520	Chr5	Bradi5g15246	18746110	18749535	0.228198	0.699023	0.326452
Chr3	Pgl_GLEAN_10024409	PgMYB81	59460364	59462238	Chr3	Bradi3g46910	48402919	48405798	0.100177	0.376052	0.266392
Chr3	Pgl_GLEAN_10024409	PgMYB81	59460364	59462238	Chr5	Bradi5g12417	16034685	16037607	0.152061	0.4136	0.367653
Chr3	Pgl_GLEAN_10010695	PgMYB70	8058303	8060597	Chr3	Bradi3g52500	53154648	53159773	0.101069	0.691022	0.14626
Chr3	Pgl_GLEAN_10010695	PgMYB70	8058303	8060597	Chr5	Bradi5g20520	23550124	23553200	0.230951	1.46415	0.157737
Chr4	Pgl_GLEAN_10007729	PgMYB107	13976894	13977825	Chr4	Bradi4g09567	8973187	8974121	0.208483	0.706829	0.294955
Chr4	Pgl_GLEAN_10034301	PgMYB120	140810373	140811158	Chr3	Bradi3g42350	43768667	43770171	0.227745	0.870434	0.261645
Chr4	Pgl_GLEAN_10034301	PgMYB120	140810373	140811158	Chr3	Bradi3g42430	43807490	43814061	0.486038	1.79791	0.270335
Chr4	Pgl_GLEAN_10034301	PgMYB120	140810373	140811158	Chr4	Bradi4g36460	41613498	41621422	0.162318	0.782896	0.20733
Chr4	Pgl_GLEAN_10034291	PgMYB121	141183101	141185105	Chr3	Bradi3g42430	43807490	43814061	0.176355	0.737562	0.239105
Chr4	Pgl_GLEAN_10034291	PgMYB121	141183101	141185105	Chr4	Bradi4g36210	41396163	41400405	0.285218	0.983148	0.290107
Chr4	Pgl_GLEAN_10026254	PgMYB108	14946705	14957428	Chr4	Bradi4g09900	9427219	9429096	0.321474	0.676764	0.475016
Chr4	Pgl_GLEAN_10026254	PgMYB108	14946705	14957428	Chr4	Bradi4g04627	3812082	3814267	0.260346	0.768378	0.338825
Chr4	Pgl_GLEAN_10033016	PgMYB124	175094529	175096819	Chr4	Bradi4g41277	45359990	45361334	0.193642	0.631683	0.306549
Chr4	Pgl_GLEAN_10030875	PgMYB111	55528138	55530117	Chr3	Bradi3g17165	15270549	15273344	0.259448	0.665199	0.390031
Chr4	Pgl_GLEAN_10027372	PgMYB112	60096525	60098621	Chr3	Bradi3g14830	13160781	13163813	0.24423	0.717425	0.340426
Chr4	Pgl_GLEAN_10023931	PgMYB113	62891728	62901059	Chr3	Bradi3g16515	14681412	14691866	0.163887	0.630317	0.260007
Chr4	Pgl_GLEAN_10031352	PgMYB114	73303376	73304606	Chr3	Bradi3g18977	17634023	17635485	0.233809	0.636273	0.367467
Chr5	Pgl_GLEAN_10001215	PgMYB135	100219849	100222160	Chr3	Bradi3g33400	35502827	35505926	0.0626766	0.44781	0.139963
Chr5	Pgl_GLEAN_10003870	PgMYB136	106827781	106829655	Chr3	Bradi3g32241	34251187	34254947	0.367194	0.727637	0.504638
Chr5	Pgl_GLEAN_10034383	PgMYB137	115971950	115973798	Chr1	Bradi1g60106	59544337	59546826	0.283818	0.7342	0.386568
Chr5	Pgl_GLEAN_10024859	PgMYB138	120455141	120456053	Chr1	Bradi1g61160	60703448	60706011	0.216046	0.532859	0.405447
Chr5	Pgl_GLEAN_10024859	PgMYB138	120455141	120456053	Chr1	Bradi1g20540	16444696	16446395	0.283645	0.663809	0.427299
Chr5	Pgl_GLEAN_10024824	PgMYB139	121391288	121392666	Chr1	Bradi1g61397	61021043	61022832	0.080076	0.295543	0.270945
Chr5	Pgl_GLEAN_10024824	PgMYB139	121391288	121392666	Chr1	Bradi1g20250	16215023	16216762	0.180611	0.663718	0.272121
Chr5	Pgl_GLEAN_10015206	PgMYB140	124674930	124676977	Chr1	Bradi1g63690	63138558	63143357	0.0883566	0.677416	0.130432
Chr5	Pgl_GLEAN_10015206	PgMYB140	124674930	124676977	Chr1	Bradi1g17400	13934960	13937466	0.274524	5.65107	0.048579
Chr5	Pgl_GLEAN_10026185	PgMYB141	126859479	126860936	Chr1	Bradi1g64140	63561506	63563716	0.117024	0.40433	0.289427
Chr5	Pgl_GLEAN_10009674	PgMYB142	128477805	128481179	Chr1	Bradi1g63530	62899692	62905704	0.16633	0.483659	0.343899
Chr5	Pgl_GLEAN_10014494	PgMYB144	137252839	137253461	Chr1	Bradi1g67910	66700967	66701958	0.398059	1.02058	0.390034
Chr5	Pgl_GLEAN_10023408	PgMYB145	138360524	138367951	Chr1	Bradi1g68505	67287723	67289768	0.0457889	0.869086	0.0526863
Chr5	Pgl_GLEAN_10023408	PgMYB145	138360524	138367951	Chr3	Bradi3g21230	20293031	20296729	0.0976149	0.723639	0.134894
Chr5	Pgl_GLEAN_10024234	PgMYB146	139121390	139122136	Chr1	Bradi1g68800	67508699	67509992	0.495106	0.425723	1.16298
Chr5	Pgl_GLEAN_10014410	PgMYB147	141218324	141222976	Chr1	Bradi1g69480	68208776	68216223	0.102362	0.551827	0.185496
Chr5	Pgl_GLEAN_10009509	PgMYB148	153816437	153817649	Chr1	Bradi1g75595	72690789	72692333	0.139213	0.628262	0.221585
Chr5	Pgl_GLEAN_10009509	PgMYB148	153816437	153817649	Chr5	Bradi5g15246	18746110	18749535	0.266694	0.809081	0.329626
Chr5	Pgl_GLEAN_10037679	PgMYB149	154904694	154907779	Chr3	Bradi3g32241	34251187	34254947	0.40726	1.11259	0.366045
Chr5	Pgl_GLEAN_10009748	PgMYB126	33613428	33616783	Chr1	Bradi1g36542	32339948	32346846	0.384763	0.704093	0.546467
Chr5	Pgl_GLEAN_10007629	PgMYB129	69761871	69764398	Chr1	Bradi1g31837	27391758	27395029	0.177554	0.812148	0.218623
Chr5	Pgl_GLEAN_10007629	PgMYB129	69761871	69764398	Chr3	Bradi3g05500	3878311	3882524	0.269636	0.759342	0.355092
Chr5	Pgl_GLEAN_10018726	PgMYB130	71218505	71224517	Chr1	Bradi1g32330	27751575	27756661	0.106961	0.707219	0.151241
Chr5	Pgl_GLEAN_10018730	PgMYB131	71261073	71263189	Chr1	Bradi1g32370	27780413	27783387	0.279169	0.727907	0.383523
Chr5	Pgl_GLEAN_10026117	PgMYB132	74695424	74697000	Chr1	Bradi1g32720	28221418	28223124	0.256296	0.580053	0.44185
Chr5	Pgl_GLEAN_10038507	PgMYB133	80929335	80931746	Chr1	Bradi1g34470	30155727	30159061	0.16331	0.789501	0.206852
Chr5	Pgl_GLEAN_10038507	PgMYB133	80929335	80931746	Chr3	Bradi3g03538	2329882	2333626	0.252604	1.2718	0.198619
Chr5	Pgl_GLEAN_10021771	PgMYB134	99603046	99604465	Chr3	Bradi3g33440	35554607	35556366	0.266283	0.482894	0.551431
Chr6	Pgl_GLEAN_10009833	PgMYB172	117624123	117627064	Chr2	Bradi2g42240	42485308	42489847	0.172704	0.48965	0.352709
Chr6	Pgl_GLEAN_10030436	PgMYB175	186179952	186180881	Chr2	Bradi2g11430	9713159	9714347	0.24293	0.658771	0.368762
Chr6	Pgl_GLEAN_10010138	PgMYB177	190788488	190789969	Chr2	Bradi2g11080	9280376	9282653	0.0915066	0.566237	0.161605
Chr6	Pgl_GLEAN_10014000	PgMYB178	199563038	199569338	Chr2	Bradi2g10340	8586587	8588930	0.546323	0.823325	0.663557
Chr6	Pgl_GLEAN_10010463	PgMYB154	21165723	21169107	Chr2	Bradi2g58020	55842475	55846926	0.127308	0.771792	0.164951
Chr6	Pgl_GLEAN_10030557	PgMYB181	216479281	216480633	Chr2	Bradi2g01960	1332570	1334291	0.186041	0.565139	0.329195
Chr6	Pgl_GLEAN_10004547	PgMYB183	225667939	225669521	Chr2	Bradi2g00423	114621	116146	0.323726	0.92692	0.349249
Chr6	Pgl_GLEAN_10028933	PgMYB185	227310821	227311711	Chr2	Bradi2g04252	2971796	2973125	0.258776	0.692373	0.373752
Chr6	Pgl_GLEAN_10024668	PgMYB187	231798060	231799103	Chr2	Bradi2g05590	4080882	4086031	0.163604	0.58515	0.279593
Chr6	Pgl_GLEAN_10024645	PgMYB189	232325639	232327559	Chr2	Bradi2g05760	4244609	4246642	0.2491	0.631325	0.394567
Chr6	Pgl_GLEAN_10031693	PgMYB155	26091126	26092739	Chr2	Bradi2g56520	54633245	54634639	0.136741	0.449839	0.303978
Chr6	Pgl_GLEAN_10031693	PgMYB155	26091126	26092739	Chr2	Bradi2g24400	22196004	22197808	0.162305	0.574044	0.282739
Chr6	Pgl_GLEAN_10020208	PgMYB156	29277887	29278736	Chr2	Bradi2g55797	54068702	54070374	0.225303	0.32183	0.700068
Chr6	Pgl_GLEAN_10020208	PgMYB156	29277887	29278736	Chr2	Bradi2g23978	21735450	21736765	0.25087	0.365777	0.685854
Chr6	Pgl_GLEAN_10020166	PgMYB157	30054880	30060540	Chr2	Bradi2g55303	53748854	53752349	0.508339	4.91331	0.103462
Chr6	Pgl_GLEAN_10032441	PgMYB158	31625223	31626077	Chr2	Bradi2g55217	53680501	53682314	0.239122	0.339391	0.704563
Chr6	Pgl_GLEAN_10032441	PgMYB158	31625223	31626077	Chr2	Bradi2g23710	21398454	21400574	0.191974	0.476591	0.402806
Chr6	Pgl_GLEAN_10032472	PgMYB159	32515311	32516764	Chr2	Bradi2g55040	53568119	53573764	0.24876	0.75606	0.329022
Chr6	Pgl_GLEAN_10005529	PgMYB161	34150962	34156255	Chr2	Bradi2g54640	53279393	53286257	0.210989	0.690128	0.305724
Chr6	Pgl_GLEAN_10005529	PgMYB161	34150962	34156255	Chr2	Bradi2g23310	20850601	20860279	0.372603	1.19977	0.310563
Chr6	Pgl_GLEAN_10022172	PgMYB151	4151620	4152568	Chr2	Bradi2g44770	44907627	44908974	0.294291	0.52282	0.562892
Chr6	Pgl_GLEAN_10022161	PgMYB152	4306302	4306577	Chr2	Bradi2g44520	44766852	44767666	0.175511	0.201098	0.872761
Chr6	Pgl_GLEAN_10037254	PgMYB162	44081902	44084574	Chr2	Bradi2g53010	52023782	52027854	0.101679	0.545275	0.186472
Chr6	Pgl_GLEAN_10037339	PgMYB163	64792353	64793590	Chr2	Bradi2g48521	48570450	48576872	0.301229	0.764766	0.393884
Chr6	Pgl_GLEAN_10024574	PgMYB164	69960865	69962449	Chr2	Bradi2g47887	48036518	48038546	0.11495	0.627278	0.183252
Chr6	Pgl_GLEAN_10012285	PgMYB165	70936081	70941636	Chr2	Bradi2g47820	47971646	47977828	0.211491	0.755064	0.280097
Chr6	Pgl_GLEAN_10020860	PgMYB166	74057608	74058689	Chr2	Bradi2g47887	48036518	48038546	0.422292	1.50469	0.28065
Chr6	Pgl_GLEAN_10020860	PgMYB166	74057608	74058689	Chr2	Bradi2g47590	47759404	47761057	0.0987032	0.427196	0.231049
Chr6	Pgl_GLEAN_10020860	PgMYB166	74057608	74058689	Chr2	Bradi2g17982	15994110	15996164	0.193088	0.51986	0.371424
Chr6	Pgl_GLEAN_10036366	PgMYB167	76271038	76271964	Chr2	Bradi2g47367	47507862	47509578	0.214255	0.444545	0.481964
Chr6	Pgl_GLEAN_10032520	PgMYB168	79346725	79347872	Chr2	Bradi2g17280	15383968	15385618	0.303143	0.617427	0.490977
Chr6	Pgl_GLEAN_10023913	PgMYB169	87236926	87237192	Chr2	Bradi2g44520	44766852	44767666	0.468322	2.10472	0.222511
Chr6	Pgl_GLEAN_10023913	PgMYB169	87236926	87237192	Chr2	Bradi2g45770	45966480	45967696	0.14477	0.706766	0.204834
Chr6	Pgl_GLEAN_10023913	PgMYB169	87236926	87237192	Chr2	Bradi2g16120	14196431	14197945	0.236178	1.20569	0.195887
Chr6	Pgl_GLEAN_10022186	PgMYB170	88007335	88007812	Chr2	Bradi2g44770	44907627	44908974	0.159192	0.423531	0.37587
Chr7	Pgl_GLEAN_10019884	PgMYB204	111509902	111516281	Chr1	Bradi1g58087	57158143	57166602	0.266528	0.644652	0.413445
Chr7	Pgl_GLEAN_10021694	PgMYB205	118162049	118166438	Chr1	Bradi1g28920	24301996	24309559	0.145897	0.448712	0.325145
Chr7	Pgl_GLEAN_10001965	PgMYB191	135966	136955	Chr1	Bradi1g64140	63561506	63563716	0.237791	0.566764	0.41956
Chr7	Pgl_GLEAN_10013916	PgMYB198	32400720	32402099	Chr1	Bradi1g26920	22034719	22036782	0.183926	0.513933	0.357879
Chr7	Pgl_GLEAN_10019811	PgMYB200	44995914	44999997	Chr3	Bradi3g42430	43807490	43814061	0.19918	1.07631	0.185058
Chr7	Pgl_GLEAN_10019811	PgMYB200	44995914	44999997	Chr4	Bradi4g36210	41396163	41400405	0.196358	0.51148	0.383901
Chr7	Pgl_GLEAN_10015650	PgMYB193	6539265	6540649	Chr1	Bradi1g20250	16215023	16216762	0.246688	0.590474	0.417779
Chr7	Pgl_GLEAN_10015650	PgMYB193	6539265	6540649	Chr1	Bradi1g61397	61021043	61022832	0.240437	0.570465	0.421475
Chr7	Pgl_GLEAN_10000710	PgMYB192	730454	732722	Chr1	Bradi1g17400	13934960	13937466	0.225608	1.07268	0.210322
Chr7	Pgl_GLEAN_10013308	PgMYB195	7560160	7564132	Chr1	Bradi1g20586	16479812	16485257	0.231156	0.727804	0.317607
