# Supplementary material for: Genome-Wide Identification and Transcriptional Analysis of the MYB Gene Family in Pearl Millet (Pennisetum glaucum)
Source: Int J Mol Sci. 2023 Jan 27;24(3):2484. doi: 10.3390/ijms24032484 (PMC9916650; doi:10.3390/ijms24032484)
Supplement: Supplementary file 1 [file ijms-24-02484-s001.zip › Table S4. The Ka_Ks ratios for orthologous PgMYB genes between Pennisetum glaucum and Oryza sativa.xlsx]

## Sheet: Sheet1
Table S4. The Ka/Ks ratios for orthologous PgMYB genes between Pennisetum glaucum and Oryza sativa
Location on Pennisetum glaucum genome					Location on Oryza sativa genome
No. Chr	Gene ID	Gene Name	Start	End	No.Chr	Gene ID	Start	End	Ka	Ks	Ka_Ks
Chr1	Pgl_GLEAN_10018773	PgMYB11	183947465	183947731	Chr1	LOC_Os01g65370	37932258	37933372	0.0329584	0.43208	0.0762786
Chr1	Pgl_GLEAN_10018773	PgMYB11	183947465	183947731	Chr5	LOC_Os05g35500	21099467	21100588	0.0243685	0.422638	0.057658
Chr1	Pgl_GLEAN_10001056	PgMYB12	192824095	192827253	Chr1	LOC_Os01g63680	36936986	36939375	0.844046	1.18934	0.709679
Chr1	Pgl_GLEAN_10027640	PgMYB13	193265982	193266996	Chr5	LOC_Os05g37730	22081376	22083466	0.131479	0.352621	0.372862
Chr1	Pgl_GLEAN_10025716	PgMYB14	197223702	197229892	Chr1	LOC_Os01g62410	36122786	36128441	0.353752	0.877244	0.403254
Chr1	Pgl_GLEAN_10025716	PgMYB14	197223702	197229892	Chr5	LOC_Os05g38460	22553306	22561005	0.27459	0.562995	0.487731
Chr1	Pgl_GLEAN_10035698	PgMYB15	206068521	206070325	Chr3	LOC_Os03g20900	11838970	11841217	0.36279	2.34937	0.15442
Chr1	Pgl_GLEAN_10035698	PgMYB15	206068521	206070325	Chr5	LOC_Os05g40960	24015243	24017576	0.106852	0.574089	0.186125
Chr1	Pgl_GLEAN_10035698	PgMYB15	206068521	206070325	Chr7	LOC_Os07g48596	29092003	29094140	0.432501	3.95534	0.109346
Chr1	Pgl_GLEAN_10013674	PgMYB16	225721911	225723025	Chr1	LOC_Os01g50720	29132173	29133909	0.204677	0.612034	0.334421
Chr1	Pgl_GLEAN_10013674	PgMYB16	225721911	225723025	Chr5	LOC_Os05g46610	26987460	26989035	0.189562	0.549788	0.344791
Chr1	Pgl_GLEAN_10011787	PgMYB18	232114066	232115149	Chr1	LOC_Os01g47370	27062505	27064276	0.20792	0.896744	0.231861
Chr1	Pgl_GLEAN_10011787	PgMYB18	232114066	232115149	Chr5	LOC_Os05g49240	28253508	28255090	0.0769906	0.683926	0.112572
Chr1	Pgl_GLEAN_10011958	PgMYB20	237855754	237856470	Chr1	LOC_Os01g41900	23760347	23762387	0.36988	0.840285	0.440184
Chr1	Pgl_GLEAN_10011958	PgMYB20	237855754	237856470	Chr5	LOC_Os05g51160	29347252	29348519	0.224723	0.596718	0.376598
Chr1	Pgl_GLEAN_10027871	PgMYB21	241765297	241766737	Chr1	LOC_Os01g09640	4971466	4973555	0.261981	0.996993	0.262771
Chr1	Pgl_GLEAN_10027871	PgMYB21	241765297	241766737	Chr5	LOC_Os05g10690	5870175	5873986	0.127969	0.590931	0.216555
Chr1	Pgl_GLEAN_10029419	PgMYB22	252841481	252843058	Chr1	LOC_Os01g18240	10217782	10219691	0.143366	0.99961	0.143422
Chr1	Pgl_GLEAN_10029419	PgMYB22	252841481	252843058	Chr5	LOC_Os05g04820	2311396	2315429	0.0395504	0.547893	0.0721864
Chr1	Pgl_GLEAN_10005876	PgMYB23	254795399	254796970	Chr1	LOC_Os01g19330	10934895	10935992	0.18751	0.648437	0.289173
Chr1	Pgl_GLEAN_10021026	PgMYB24	255881990	255888985	Chr5	LOC_Os05g03550	1501068	1502720	0.253948	0.778661	0.326134
Chr1	Pgl_GLEAN_10025141	PgMYB2	2587119	2590232	Chr11	LOC_Os11g45740	27670321	27673334	0.184369	1.01152	0.18227
Chr1	Pgl_GLEAN_10034693	PgMYB4	75861241	75869466	Chr8	LOC_Os08g33940	21240597	21241862	0.333868	1.10335	0.302594
Chr1	Pgl_GLEAN_10011717	PgMYB28	263118850	263131389	Chr1	LOC_Os01g12860	7121191	7123857	0.169353	1.15931	0.14608
Chr1	Pgl_GLEAN_10038213	PgMYB29	270595969	270601579	Chr11	LOC_Os11g08080	4220839	4229441	0.17334	0.611819	0.283319
Chr1	Pgl_GLEAN_10038213	PgMYB29	270595969	270601579	Chr12	LOC_Os12g07730	3879249	3885072	0.165895	0.585243	0.283463
Chr1	Pgl_GLEAN_10038222	PgMYB30	270683805	270684526	Chr11	LOC_Os11g07890	4049330	4050752	0.18302	0.751002	0.243701
Chr1	Pgl_GLEAN_10009918	PgMYB32	274900694	274901836	Chr11	LOC_Os11g03440	1317256	1318705	0.198898	0.661606	0.300629
Chr1	Pgl_GLEAN_10009918	PgMYB32	274900694	274901836	Chr12	LOC_Os12g03150	1200746	1201965	0.152047	0.571214	0.266182
Chr1	Pgl_GLEAN_10019982	PgMYB3	52231622	52232874	Chr11	LOC_Os11g35390	20735117	20737678	0.189393	0.45237	0.418669
Chr1	Pgl_GLEAN_10031720	PgMYB7	79574293	79575500	Chr9	LOC_Os09g23620	14029432	14030989	0.124176	0.580267	0.213998
Chr1	Pgl_GLEAN_10012352	PgMYB1	797639	798571	Chr11	LOC_Os11g47460	28703901	28705306	0.184519	0.812586	0.227076
Chr2	Pgl_GLEAN_10028194	PgMYB55	105210328	105211447	Chr6	LOC_Os06g11780	6239975	6241172	0.0574529	0.720198	0.0797738
Chr2	Pgl_GLEAN_10023444	PgMYB36	11364070	11369344	Chr3	LOC_Os03g53960	30935662	30942983	0.262826	0.745105	0.352737
Chr2	Pgl_GLEAN_10032646	PgMYB57	120285067	120286075	Chr2	LOC_Os02g49986	30539853	30541113	0.401672	1.18538	0.338854
Chr2	Pgl_GLEAN_10036901	PgMYB58	127912146	127920027	Chr6	LOC_Os06g19980	11453023	11460639	0.0998017	0.589257	0.169369
Chr2	Pgl_GLEAN_10002927	PgMYB37	15881959	15883302	Chr3	LOC_Os03g51110	29236187	29238382	0.6191	1.09047	0.567735
Chr2	Pgl_GLEAN_10023164	PgMYB59	184327994	184329956	Chr2	LOC_Os02g17190	9848231	9852383	0.276522	0.952753	0.290235
Chr2	Pgl_GLEAN_10037977	PgMYB61	194567818	194569963	Chr2	LOC_Os02g14490	7986053	7988630	0.200065	0.791687	0.252707
Chr2	Pgl_GLEAN_10017572	PgMYB63	213768147	213771923	Chr2	LOC_Os02g10060	5238175	5242106	0.120455	0.661796	0.182012
Chr2	Pgl_GLEAN_10016698	PgMYB64	217974037	217978016	Chr2	LOC_Os02g08500	4573831	4578257	0.437492	1.35234	0.323508
Chr2	Pgl_GLEAN_10016698	PgMYB64	217974037	217978016	Chr6	LOC_Os06g43910	26450761	26455305	0.184435	1.09381	0.168616
Chr2	Pgl_GLEAN_10027845	PgMYB65	222878707	222880650	Chr6	LOC_Os06g45410	27456955	27459557	0.21913	0.6352	0.344978
Chr2	Pgl_GLEAN_10020538	PgMYB66	236248342	236250458	Chr2	LOC_Os02g04640	2075629	2079136	0.222059	1.44346	0.153837
Chr2	Pgl_GLEAN_10013105	PgMYB40	28088750	28091314	Chr12	LOC_Os12g41920	25984514	25987922	0.157877	0.373812	0.422343
Chr2	Pgl_GLEAN_10031141	PgMYB42	36591916	36594448	Chr3	LOC_Os03g38210	21212377	21214189	0.097323	0.424062	0.229502
Chr2	Pgl_GLEAN_10004603	PgMYB44	47464253	47464684	Chr10	LOC_Os10g33810	17923596	17926286	0.180328	0.340106	0.530212
Chr2	Pgl_GLEAN_10004603	PgMYB44	47464253	47464684	Chr2	LOC_Os02g41510	24878777	24879932	0.273517	1.14296	0.239306
Chr2	Pgl_GLEAN_10032286	PgMYB45	49560523	49562884	Chr10	LOC_Os10g32600	17076098	17081344	0.402452	1.33434	0.301612
Chr2	Pgl_GLEAN_10011452	PgMYB46	53257854	53258328	Chr10	LOC_Os10g30690	15983796	15987983	0.18222	0.557182	0.327039
Chr2	Pgl_GLEAN_10021368	PgMYB48	68782565	68786613	Chr6	LOC_Os06g01670	398679	403494	0.214222	0.419712	0.510403
Chr2	Pgl_GLEAN_10022854	PgMYB34	8374146	8375336	Chr3	LOC_Os03g56090	31952891	31954550	0.575225	1.35704	0.423882
Chr2	Pgl_GLEAN_10029006	PgMYB50	88036698	88038188	Chr6	LOC_Os06g07700	3723342	3725225	0.199074	0.75612	0.263284
Chr2	Pgl_GLEAN_10029495	PgMYB51	90670801	90676646	Chr6	LOC_Os06g08290	4015962	4019316	0.208987	1.17962	0.177165
Chr3	Pgl_GLEAN_10012406	PgMYB72	13130719	13131887	Chr6	LOC_Os06g11780	6239975	6241172	0.248932	0.700063	0.355586
Chr3	Pgl_GLEAN_10003205	PgMYB84	148681995	148689668	Chr1	LOC_Os01g12860	7121191	7123857	0.0992552	0.564697	0.175767
Chr3	Pgl_GLEAN_10012225	PgMYB73	16546883	16547771	Chr2	LOC_Os02g49986	30539853	30541113	0.121892	0.340048	0.358456
Chr3	Pgl_GLEAN_10012225	PgMYB73	16546883	16547771	Chr6	LOC_Os06g14670	8251038	8252390	0.074986	0.649732	0.115411
Chr3	Pgl_GLEAN_10038634	PgMYB86	193927717	193932983	Chr4	LOC_Os04g28090	16579948	16587160	0.0803249	0.322384	0.24916
Chr3	Pgl_GLEAN_10010553	PgMYB87	230874042	230876313	Chr4	LOC_Os04g38740	23024212	23026644	0.041373	0.34123	0.121247
Chr3	Pgl_GLEAN_10012731	PgMYB89	238496740	238498133	Chr4	LOC_Os04g39470	23510286	23512025	0.213701	0.716634	0.298201
Chr3	Pgl_GLEAN_10018370	PgMYB90	253450474	253452242	Chr2	LOC_Os02g40530	24580457	24582527	0.13525	0.491247	0.27532
Chr3	Pgl_GLEAN_10018370	PgMYB90	253450474	253452242	Chr4	LOC_Os04g42950	25405125	25407689	0.301399	0.62868	0.479416
Chr3	Pgl_GLEAN_10035636	PgMYB91	256272527	256273940	Chr10	LOC_Os10g33810	17923596	17926286	0.250908	0.639736	0.392206
Chr3	Pgl_GLEAN_10035636	PgMYB91	256272527	256273940	Chr2	LOC_Os02g41510	24878777	24879932	0.163276	0.316129	0.516485
Chr3	Pgl_GLEAN_10035636	PgMYB91	256272527	256273940	Chr4	LOC_Os04g43680	25843038	25844912	0.222837	0.451412	0.493644
Chr3	Pgl_GLEAN_10008203	PgMYB74	25676997	25678321	Chr2	LOC_Os02g46780	28558264	28560020	0.32931	0.686841	0.479456
Chr3	Pgl_GLEAN_10008203	PgMYB74	25676997	25678321	Chr4	LOC_Os04g50770	30028840	30030685	0.212702	0.639153	0.332787
Chr3	Pgl_GLEAN_10027659	PgMYB75	27229177	27231397	Chr2	LOC_Os02g46030	28041117	28044149	0.321039	1.69724	0.189154
Chr3	Pgl_GLEAN_10027659	PgMYB75	27229177	27231397	Chr4	LOC_Os04g49450	29500955	29503774	0.193234	0.586064	0.329714
Chr3	Pgl_GLEAN_10018049	PgMYB96	278678155	278681210	Chr4	LOC_Os04g47890	28470386	28474272	0.0731258	0.660446	0.110722
Chr3	Pgl_GLEAN_10027682	PgMYB76	28080709	28084771	Chr2	LOC_Os02g45670	27776483	27781443	0.401048	1.36878	0.292998
Chr3	Pgl_GLEAN_10022511	PgMYB97	282395600	282397845	Chr2	LOC_Os02g46030	28041117	28044149	0.268878	0.682448	0.39399
Chr3	Pgl_GLEAN_10022511	PgMYB97	282395600	282397845	Chr4	LOC_Os04g49450	29500955	29503774	0.113569	0.272145	0.417309
Chr3	Pgl_GLEAN_10023805	PgMYB98	285681859	285682510	Chr4	LOC_Os04g50680	29995755	29997261	0.244712	0.600195	0.407721
Chr3	Pgl_GLEAN_10023817	PgMYB99	285885710	285887095	Chr2	LOC_Os02g46780	28558264	28560020	0.183889	0.422763	0.43497
Chr3	Pgl_GLEAN_10023817	PgMYB99	285885710	285887095	Chr4	LOC_Os04g50770	30028840	30030685	0.213101	1.04325	0.204266
Chr3	Pgl_GLEAN_10004210	PgMYB100	286573502	286575753	Chr2	LOC_Os02g47190	28808920	28811960	0.51056	2.03104	0.251379
Chr3	Pgl_GLEAN_10004210	PgMYB102	299679876	299682059	Chr4	LOC_Os04g56990	33972765	33975729	0.0845625	0.593786	0.142412
Chr3	Pgl_GLEAN_10031849	PgMYB103	300773715	300776344	Chr4	LOC_Os04g58020	34555302	34559408	0.13659	0.251045	0.544084
Chr3	Pgl_GLEAN_10029306	PgMYB77	39068797	39070303	Chr2	LOC_Os02g42870	25778113	25780795	0.168116	0.630373	0.266692
Chr3	Pgl_GLEAN_10029303	PgMYB78	39139785	39142393	Chr4	LOC_Os04g45020	26638119	26640661	0.175259	0.418222	0.419056
Chr3	Pgl_GLEAN_10027268	PgMYB80	47927271	47928520	Chr2	LOC_Os02g40530	24580457	24582527	0.270808	0.528566	0.512344
Chr3	Pgl_GLEAN_10027268	PgMYB80	47927271	47928520	Chr4	LOC_Os04g42950	25405125	25407689	0.173267	0.496236	0.349161
Chr3	Pgl_GLEAN_10024409	PgMYB81	59460364	59462238	Chr4	LOC_Os04g38740	23024212	23026644	0.0758754	0.69625	0.108977
Chr3	Pgl_GLEAN_10010695	PgMYB70	8058303	8060597	Chr2	LOC_Os02g47190	28808920	28811960	0.152945	0.64073	0.238705
Chr4	Pgl_GLEAN_10034301	PgMYB120	140810373	140811158	Chr8	LOC_Os08g43550	27547971	27549173	0.158652	0.955501	0.166041
Chr4	Pgl_GLEAN_10034301	PgMYB120	140810373	140811158	Chr9	LOC_Os09g36730	27547971	27549173	0.2276	0.956109	0.238048
Chr4	Pgl_GLEAN_10034291	PgMYB121	141183101	141185105	Chr9	LOC_Os09g36250	20915434	20919808	0.205132	1.06143	0.19326
Chr4	Pgl_GLEAN_10026254	PgMYB108	14946705	14957428	Chr11	LOC_Os11g45740	27670321	27673334	0.127386	0.742945	0.17146
Chr4	Pgl_GLEAN_10018451	PgMYB123	172584414	172590247	Chr11	LOC_Os11g08080	4220839	4229441	0.28877	0.840413	0.343605
Chr4	Pgl_GLEAN_10033016	PgMYB124	175094529	175096819	Chr11	LOC_Os11g07890	4049330	4050752	0.146312	0.435171	0.336217
Chr4	Pgl_GLEAN_10027372	PgMYB112	60096525	60098621	Chr8	LOC_Os08g05510	2934798	2940214	0.143993	0.480648	0.299582
Chr4	Pgl_GLEAN_10023931	PgMYB113	62891728	62901059	Chr8	LOC_Os08g06110	3360865	3373384	0.170502	0.657025	0.259506
Chr4	Pgl_GLEAN_10031352	PgMYB114	73303376	73304606	Chr8	LOC_Os08g15020	9069082	9070671	0.054306	0.380544	0.142706
Chr5	Pgl_GLEAN_10001215	PgMYB135	100219849	100222160	Chr10	LOC_Os10g41200	22128465	22131627	0.165246	0.479038	0.344954
Chr5	Pgl_GLEAN_10024859	PgMYB138	120455141	120456053	Chr7	LOC_Os07g43580	26075493	26077145	0.0721552	0.452544	0.159444
Chr5	Pgl_GLEAN_10024824	PgMYB139	121391288	121392666	Chr3	LOC_Os03g25550	14598168	14599574	0.0814842	0.694327	0.117357
Chr5	Pgl_GLEAN_10015206	PgMYB140	124674930	124676977	Chr3	LOC_Os03g20900	11838970	11841217	0.286202	2.46907	0.115915
Chr5	Pgl_GLEAN_10015206	PgMYB140	124674930	124676977	Chr7	LOC_Os07g48596	29092003	29094140	0.135447	0.314318	0.430924
Chr5	Pgl_GLEAN_10026185	PgMYB141	126859479	126860936	Chr3	LOC_Os03g20090	11326096	11328222	0.32054	0.787442	0.407064
Chr5	Pgl_GLEAN_10026185	PgMYB141	126859479	126860936	Chr7	LOC_Os07g48870	29242089	29243584	0.186967	0.538383	0.347275
Chr5	Pgl_GLEAN_10009674	PgMYB142	128477805	128481179	Chr3	LOC_Os03g21240	12126320	12131242	0.367295	0.870387	0.42199
Chr5	Pgl_GLEAN_10023408	PgMYB145	138360524	138367951	Chr10	LOC_Os10g03540	1530563	1532176	0.172844	0.635586	0.271944
Chr5	Pgl_GLEAN_10023408	PgMYB145	138360524	138367951	Chr3	LOC_Os03g13790	7469617	7475442	0.52244	0.503475	1.03767
Chr5	Pgl_GLEAN_10024234	PgMYB146	139121390	139122136	Chr3	LOC_Os03g13310	7184393	7189221	0.0972451	0.649308	0.149767
Chr5	Pgl_GLEAN_10014410	PgMYB147	141218324	141222976	Chr3	LOC_Os03g12350	6512771	6518511	0.129885	0.425802	0.305037
Chr5	Pgl_GLEAN_10009509	PgMYB148	153816437	153817649	Chr3	LOC_Os03g04900	2341955	2343111	0.444276	0.728901	0.609515
Chr5	Pgl_GLEAN_10009748	PgMYB126	33613428	33616783	Chr6	LOC_Os06g40330	24005166	24012308	0.192778	0.792904	0.243129
Chr5	Pgl_GLEAN_10007629	PgMYB129	69761871	69764398	Chr6	LOC_Os06g45410	27456955	27459557	0.0991263	0.607614	0.16314
Chr5	Pgl_GLEAN_10018726	PgMYB130	71218505	71224517	Chr6	LOC_Os06g45840	27734973	27738465	0.508856	1.32242	0.384791
Chr5	Pgl_GLEAN_10018730	PgMYB131	71261073	71263189	Chr2	LOC_Os02g07170	3682192	3684126	0.20881	0.51009	0.409359
Chr5	Pgl_GLEAN_10018730	PgMYB131	71261073	71263189	Chr6	LOC_Os06g45890	27777556	27780675	0.193403	0.44598	0.433659
Chr5	Pgl_GLEAN_10026117	PgMYB132	74695424	74697000	Chr6	LOC_Os06g46560	28270171	28272930	0.229834	1.48643	0.154622
Chr5	Pgl_GLEAN_10038507	PgMYB133	80929335	80931746	Chr2	LOC_Os02g04640	2075629	2079136	0.131648	0.716789	0.183664
Chr5	Pgl_GLEAN_10038507	PgMYB133	80929335	80931746	Chr6	LOC_Os06g49040	29723508	29727074	0.223794	0.614962	0.363915
Chr5	Pgl_GLEAN_10021771	PgMYB134	99603046	99604465	Chr10	LOC_Os10g41260	22174848	22176685	0.21564	0.573321	0.376124
Chr6	Pgl_GLEAN_10030436	PgMYB175	186179952	186180881	Chr1	LOC_Os01g19330	10934895	10935992	0.0749627	0.596436	0.125684
Chr6	Pgl_GLEAN_10010138	PgMYB177	190788488	190789969	Chr1	LOC_Os01g18240	10217782	10219691	0.1928	0.428206	0.450251
Chr6	Pgl_GLEAN_10014000	PgMYB178	199563038	199569338	Chr1	LOC_Os01g16810	9567528	9569192	0.120273	0.666462	0.180465
Chr6	Pgl_GLEAN_10010463	PgMYB154	21165723	21169107	Chr1	LOC_Os01g67770	39387278	39391014	0.0964221	0.391325	0.246399
Chr6	Pgl_GLEAN_10030557	PgMYB181	216479281	216480633	Chr1	LOC_Os01g03720	1549241	1551011	0.154169	0.557424	0.276574
Chr6	Pgl_GLEAN_10007566	PgMYB182	219298567	219300114	Chr1	LOC_Os01g04930	2281913	2284775	0.25669	0.708577	0.362261
Chr6	Pgl_GLEAN_10004547	PgMYB183	225667939	225669521	Chr1	LOC_Os01g06320	3003860	3005728	0.130567	0.494892	0.263829
Chr6	Pgl_GLEAN_10024668	PgMYB187	231798060	231799103	Chr1	LOC_Os01g09280	4714730	4718746	0.204471	0.215359	0.949444
Chr6	Pgl_GLEAN_10024645	PgMYB189	232325639	232327559	Chr1	LOC_Os01g09640	4971466	4973555	0.207457	1.0711	0.193686
Chr6	Pgl_GLEAN_10024645	PgMYB189	232325639	232327559	Chr5	LOC_Os05g10690	5870175	5873986	0.12108	0.509069	0.237845
Chr6	Pgl_GLEAN_10031693	PgMYB155	26091126	26092739	Chr1	LOC_Os01g65370	37932258	37933372	0.150725	0.616357	0.244541
Chr6	Pgl_GLEAN_10031693	PgMYB155	26091126	26092739	Chr5	LOC_Os05g35500	21099467	21100588	0.147493	0.476588	0.309478
Chr6	Pgl_GLEAN_10020208	PgMYB156	29277887	29278736	Chr1	LOC_Os01g64360	37358205	37359556	0.219045	0.545763	0.401356
Chr6	Pgl_GLEAN_10020208	PgMYB156	29277887	29278736	Chr5	LOC_Os05g37060	21654183	21655380	0.39942	1.52513	0.261893
Chr6	Pgl_GLEAN_10020166	PgMYB157	30054880	30060540	Chr1	LOC_Os01g63680	36936986	36939375	0.200645	0.417115	0.481031
Chr6	Pgl_GLEAN_10032441	PgMYB158	31625223	31626077	Chr1	LOC_Os01g63460	36763677	36765294	0.203142	0.365095	0.556409
Chr6	Pgl_GLEAN_10032441	PgMYB158	31625223	31626077	Chr5	LOC_Os05g37730	22081376	22083466	0.194232	0.592152	0.328011
Chr6	Pgl_GLEAN_10032472	PgMYB159	32515311	32516764	Chr1	LOC_Os01g63160	36606535	36608135	0.222451	0.69003	0.322379
Chr6	Pgl_GLEAN_10005529	PgMYB161	34150962	34156255	Chr1	LOC_Os01g62410	36122786	36128441	0.359229	0.946811	0.379409
Chr6	Pgl_GLEAN_10005529	PgMYB161	34150962	34156255	Chr5	LOC_Os05g38460	22553306	22561005	0.34782	0.611336	0.568952
Chr6	Pgl_GLEAN_10022172	PgMYB151	4151620	4152568	Chr1	LOC_Os01g45090	25592575	25593523	0.300495	0.435405	0.69015
Chr6	Pgl_GLEAN_10022161	PgMYB152	4306302	4306577	Chr1	LOC_Os01g44370	25457560	25457880	0.0882081	0.503419	0.175218
Chr6	Pgl_GLEAN_10037254	PgMYB162	44081902	44084574	Chr1	LOC_Os01g59660	34508452	34512738	0.44142	1.40623	0.313902
Chr6	Pgl_GLEAN_10037254	PgMYB162	44081902	44084574	Chr5	LOC_Os05g41166	24110841	24114828	0.190515	0.463937	0.410649
Chr6	Pgl_GLEAN_10037339	PgMYB163	64792353	64793590	Chr1	LOC_Os01g52410	30117114	30118654	0.139418	0.498685	0.279571
Chr6	Pgl_GLEAN_10024574	PgMYB164	69960865	69962449	Chr1	LOC_Os01g51260	29469565	29471507	0.247708	0.90663	0.273218
Chr6	Pgl_GLEAN_10012285	PgMYB165	70936081	70941636	Chr1	LOC_Os01g51154	29405623	29411262	0.090654	0.378666	0.239404
Chr6	Pgl_GLEAN_10020860	PgMYB166	74057608	74058689	Chr1	LOC_Os01g50720	29132173	29133909	0.187185	0.483093	0.387472
Chr6	Pgl_GLEAN_10020860	PgMYB166	74057608	74058689	Chr5	LOC_Os05g46610	26987460	26989035	0.259531	0.485834	0.534197
Chr6	Pgl_GLEAN_10036366	PgMYB167	76271038	76271964	Chr1	LOC_Os01g50110	28796526	28797649	0.238713	0.548504	0.435207
Chr6	Pgl_GLEAN_10032520	PgMYB168	79346725	79347872	Chr5	LOC_Os05g48010	27524786	27526242	0.13162	0.961539	0.136885
Chr6	Pgl_GLEAN_10023913	PgMYB169	87236926	87237192	Chr1	LOC_Os01g47370	27062505	27064276	0.219633	1.21	0.181515
Chr6	Pgl_GLEAN_10023913	PgMYB169	87236926	87237192	Chr5	LOC_Os05g49240	28253508	28255090	0.20055	0.63987	0.313422
Chr6	Pgl_GLEAN_10009833	PgMYB172	117624123	117627064	Chr1	LOC_Os01g40670	22988229	22991922	0.11381	0.355079	0.320521
Chr7	Pgl_GLEAN_10019884	PgMYB204	111509902	111516281	Chr7	LOC_Os07g04700	2084109	2091650	0.127769	0.520208	0.245611
Chr7	Pgl_GLEAN_10021694	PgMYB205	118162049	118166438	Chr7	LOC_Os07g25710	14753753	14759288	0.302603	0.513713	0.589052
Chr7	Pgl_GLEAN_10001965	PgMYB191	135966	136955	Chr3	LOC_Os03g20090	11326096	11328222	0.182443	0.62544	0.291703
Chr7	Pgl_GLEAN_10001965	PgMYB191	135966	136955	Chr7	LOC_Os07g48870	29242089	29243584	0.144868	0.41073	0.352709
Chr7	Pgl_GLEAN_10015781	PgMYB197	21036167	21038191	Chr7	LOC_Os07g37210	22293736	22295309	0.120415	0.445598	0.270232
Chr7	Pgl_GLEAN_10013916	PgMYB198	32400720	32402099	Chr7	LOC_Os07g31470	18658755	18660353	0.107326	0.430405	0.24936
Chr7	Pgl_GLEAN_10019811	PgMYB200	44995914	44999997	Chr9	LOC_Os09g36250	20915434	20919808	0.270837	0.66912	0.404766
Chr7	Pgl_GLEAN_10015650	PgMYB193	6539265	6540649	Chr3	LOC_Os03g25550	14598168	14599574	0.0507778	0.281268	0.180532
Chr7	Pgl_GLEAN_10000710	PgMYB192	730454	732722	Chr7	LOC_Os07g48596	29092003	29094140	0.308103	1.1502	0.267869
