# Supplementary material for: Genome-Wide Identification and Transcriptional Analysis of the MYB Gene Family in Pearl Millet (Pennisetum glaucum)
Source: Int J Mol Sci. 2023 Jan 27;24(3):2484. doi: 10.3390/ijms24032484 (PMC9916650; doi:10.3390/ijms24032484)
Supplement: Supplementary file 1 [file ijms-24-02484-s001.zip › Table S5. The Ka_Ks ratios for orthologous PgMYB genes between Pennisetum glaucum and Arabidopsis thaliana.xlsx]

## Sheet: Sheet1
Table S5. The Ka/Ks ratios for orthologous PgMYB genes between Pennisetum glaucum and Arabidopsis thaliana
Location on Pennisetum glaucum genome					Location on Arabidopsis thaliana genome
No. Chr	Gene ID	Gene Name	Start	End	No.Chr	Gene ID	Start	End	Ka	Ks	Ka_Ks
Chr1	Pgl_GLEAN_10027871	PgMYB21	241765297	241766737	Chr5	AT5G56840.1	22980638	22982425	0.414166	3.98944	0.103816
Chr3	Pgl_GLEAN_10015401	PgMYB95	277698007	277698927	Chr4	AT4G38620.1	18053360	18055040	0.310436	1.32637	0.23405
Chr6	Pgl_GLEAN_10007906	PgMYB160	32873783	32884096	Chr2	AT2G29140.2	12530838	12535438	0.330954	1.85551	0.178363
Chr6	Pgl_GLEAN_10005529	PgMYB161	34150962	34156255	Chr3	AT3G09370.3	2879353	2882355	0.48865	1.78866	0.273194
Chr6	Pgl_GLEAN_10005529	PgMYB161	34150962	34156255	Chr5	AT5G02320.2	482793	486473	0.544216	2.07048	0.262846
