# Supplementary material for: Genome-Wide Identification and Transcriptional Analysis of the MYB Gene Family in Pearl Millet (Pennisetum glaucum)
Source: Int J Mol Sci. 2023 Jan 27;24(3):2484. doi: 10.3390/ijms24032484 (PMC9916650; doi:10.3390/ijms24032484)
Supplement: Supplementary file 1 [file ijms-24-02484-s001.zip › Table S6. The Ka_Ks ratios for orthologous PgMYB genes between Pennisetum glaucum and Setaria italica.xlsx]

## Sheet: Sheet1
Table S2. The Ka/Ks ratios for orthologous PgMYB genes between Pennisetum glaucum and Setaria italica
Location on Pennisetum glaucum genome					Location on Setaria italica genome
No. Chr	Gene ID	Gene Name	Start	End	No.Chr	Gene ID	Gene ID（Phytozome）	Start	End	Ka	Ks	Ka_Ks
Chr1	Pgl_GLEAN_10027640	PgMYB13	193265982	193266996	Chr3	KQL15244	Si022816m	18139961	18141577	0.0287297	0.16103	0.178413
Chr1	Pgl_GLEAN_10025716	PgMYB14	197223702	197229892	Chr3	KQL15175	Si021484m	17624623	17631481	0.0479871	0.0629246	0.762612
Chr1	Pgl_GLEAN_10025716	PgMYB14	197223702	197229892	Chr5	KQL07671	Si000842m	41107145	41113718	0.36407	0.955884	0.380873
Chr1	Pgl_GLEAN_10035698	PgMYB15	206068521	206070325	Chr3	KQL14958	Si022265m	15077634	15079567	0.0164842	0.107771	0.152955
Chr1	Pgl_GLEAN_10013674	PgMYB16	225721911	225723025	Chr3	KQL14525	Si022730m	11754514	11756057	0.14634	0.228443	0.640598
Chr1	Pgl_GLEAN_10013674	PgMYB16	225721911	225723025	Chr5	KQL06598	Si005548m	34527324	34528934	0.222564	0.383425	0.580462
Chr1	Pgl_GLEAN_10011787	PgMYB18	232114066	232115149	Chr5	KQL06270	Si003539m	32280434	32281892	0.213015	0.900834	0.236464
Chr1	Pgl_GLEAN_10011796	PgMYB19	232344407	232345210	Chr3	KQL14263	Si024431m	9971474	9972302	0.0489541	0.177251	0.276186
Chr1	Pgl_GLEAN_10011958	PgMYB20	237855754	237856470	Chr3	KQL14048	Si022624m	8401762	8403237	0.0517229	0.0734176	0.704502
Chr1	Pgl_GLEAN_10011958	PgMYB20	237855754	237856470	Chr5	KQL05764	Si002334m	27702696	27704781	0.319127	0.689284	0.462984
Chr1	Pgl_GLEAN_10027871	PgMYB21	241765297	241766737	Chr3	KQL13888	Si022796m	7475790	7477479	0.0335635	0.163564	0.205201
Chr1	Pgl_GLEAN_10027871	PgMYB21	241765297	241766737	Chr5	KQL04798	Si002353m	11877274	11879287	0.231657	0.839865	0.275826
Chr1	Pgl_GLEAN_10029419	PgMYB22	252841481	252843058	Chr3	KQL13279	Si022113m	3575579	3578113	0.00699189	0.089603	0.0780319
Chr1	Pgl_GLEAN_10029419	PgMYB22	252841481	252843058	Chr5	KQL03585	Si001565m	3298513	3300764	0.134167	1.15446	0.116216
Chr1	Pgl_GLEAN_10005876	PgMYB23	254795399	254796970	Chr3	KQL13223	Si022474m	3266528	3268029	0.0192455	0.149749	0.128518
Chr1	Pgl_GLEAN_10021026	PgMYB24	255881990	255888985	Chr3	KQL13170	Si020953m	2939999	2946660	0.0562982	0.167129	0.336856
Chr1	Pgl_GLEAN_10021620	PgMYB25	258113995	258114905	Chr3	KQL13343	Si024470m	3940659	3941674	0.181688	0.269917	0.673126
Chr1	Pgl_GLEAN_10025141	PgMYB2	2587119	2590232	Chr3	KQL16588	Si022831m	42731226	42733181	0.249324	0.387142	0.644011
Chr1	Pgl_GLEAN_10025141	PgMYB2	2587119	2590232	Chr8	KQK95869	Si026574m	39057765	39060742	0.116218	0.190279	0.610775
Chr1	Pgl_GLEAN_10011728	PgMYB27	262951963	262952651	Chr3	KQL13527	Si024031m	5027456	5028172	0.0714971	0.176014	0.4062
Chr1	Pgl_GLEAN_10011717	PgMYB28	263118850	263131389	Chr3	KQL13535	Si021218m	5073307	5078391	0.035296	0.0931981	0.37872
Chr1	Pgl_GLEAN_10011717	PgMYB28	263118850	263131389	Chr5	KQL03267	Si000349m	639445	646046	0.414509	1.24295	0.333487
Chr1	Pgl_GLEAN_10038213	PgMYB29	270595969	270601579	Chr7	KQK99484	Si009412m	33091915	33095894	0.0154602	0.107705	0.143542
Chr1	Pgl_GLEAN_10038213	PgMYB29	270595969	270601579	Chr8	KQK93885	Si026004m	5586521	5591857	0.184679	1.03806	0.177908
Chr1	Pgl_GLEAN_10038222	PgMYB30	270683805	270684526	Chr7	KQK99492	Si011098m	33127602	33128475	0.0306861	0.134631	0.227927
Chr1	Pgl_GLEAN_10038222	PgMYB30	270683805	270684526	Chr8	KQK93857	Si026734m	5239732	5241218	0.184385	0.476081	0.387298
Chr1	Pgl_GLEAN_10009918	PgMYB32	274900694	274901836	Chr7	KQK99739	Si010608m	34502968	34504018	0.0644203	0.14567	0.442235
Chr1	Pgl_GLEAN_10009918	PgMYB32	274900694	274901836	Chr8	KQK93296	Si026651m	397588	398744	0.0573429	0.163567	0.350577
Chr1	Pgl_GLEAN_10019982	PgMYB3	52231622	52232874	Chr8	KQK94956	Si026733m	29091981	29093693	0.0414188	0.172008	0.240796
Chr1	Pgl_GLEAN_10034693	PgMYB4	75861241	75869466	Chr6	KQL01942	Si014183m	28266319	28267857	0.327646	0.539342	0.607493
Chr1	Pgl_GLEAN_10034717	PgMYB6	76658830	76660519	Chr6	KQL01918	Si013994m	28068610	28072398	0.0222812	0.0840038	0.26524
Chr1	Pgl_GLEAN_10031720	PgMYB7	79574293	79575500	Chr2	KQL24420	Si032544m	29903880	29904653	0.263932	0.791246	0.333565
Chr1	Pgl_GLEAN_10031720	PgMYB7	79574293	79575500	Chr6	KQL01870	Si014144m	27365774	27367253	0.0359081	0.185969	0.193087
Chr1	Pgl_GLEAN_10020657	PgMYB8	97682462	97683410	Chr6	KQL01803	Si015542m	26397426	26398612	0.141134	0.214838	0.656931
Chr2	Pgl_GLEAN_10028194	PgMYB55	105210328	105211447	Chr1	KQL31562	Si017785m	38418467	38419951	0.185485	1.32818	0.139653
Chr2	Pgl_GLEAN_10028194	PgMYB55	105210328	105211447	Chr4	KQL09941	Si008086m	7610826	7611943	0.0262653	0.0934766	0.280983
Chr2	Pgl_GLEAN_10023444	PgMYB36	11364070	11369344	Chr9	KQK87077	Si034940m	5470325	5476618	0.00843783	0.121277	0.069575
Chr2	Pgl_GLEAN_10005446	PgMYB56	118893917	118895114	Chr4	KQL10252	Si007873m	11918260	11919464	0.0891426	0.188115	0.473874
Chr2	Pgl_GLEAN_10032646	PgMYB57	120285067	120286075	Chr1	KQL31384	Si020225m	37213191	37214110	0.216311	0.520391	0.415669
Chr2	Pgl_GLEAN_10032646	PgMYB57	120285067	120286075	Chr4	KQL10212	Si007017m	10929319	10930592	0.0602057	0.147515	0.408133
Chr2	Pgl_GLEAN_10036901	PgMYB58	127912146	127920027	Chr4	KQL10402	Si008272m	14176010	14178214	0.0949686	0.155392	0.611154
Chr2	Pgl_GLEAN_10002927	PgMYB37	15881959	15883302	Chr9	KQK87379	Si037256m	6991581	6993336	0.005416	0.14621	0.0370425
Chr2	Pgl_GLEAN_10005188	PgMYB39	16440909	16441463	Chr9	KQK87386	Si038786m	7042455	7042802	0.13592	0.291524	0.466241
Chr2	Pgl_GLEAN_10023164	PgMYB59	184327994	184329956	Chr1	KQL27767	Si017987m	520710	522991	0.0621232	0.121533	0.511163
Chr2	Pgl_GLEAN_10023164	PgMYB59	184327994	184329956	Chr1	KQL29118	Si017986m	10409810	10411875	0.322396	0.606421	0.531637
Chr2	Pgl_GLEAN_10023163	PgMYB60	184393490	184399542	Chr1	KQL27769	Si020627m	527370	529998	0.209574	0.275102	0.761804
Chr2	Pgl_GLEAN_10037977	PgMYB61	194567818	194569963	Chr1	KQL27938	Si016955m	1864051	1866143	0.03787	0.185933	0.203675
Chr2	Pgl_GLEAN_10037977	PgMYB61	194567818	194569963	Chr4	KQL10921	Si006312m	28117057	28119313	0.393961	1.21397	0.324522
Chr2	Pgl_GLEAN_10017572	PgMYB63	213768147	213771923	Chr1	KQL28317	Si017006m	5001092	5004976	0.0256083	0.0989326	0.258846
Chr2	Pgl_GLEAN_10016698	PgMYB64	217974037	217978016	Chr1	KQL28425	Si016630m	5791855	5796147	0.0175941	0.107171	0.164168
Chr2	Pgl_GLEAN_10027845	PgMYB65	222878707	222880650	Chr1	KQL28521	Si017608m	6423556	6425841	0.0188828	0.148158	0.127451
Chr2	Pgl_GLEAN_10027845	PgMYB65	222878707	222880650	Chr4	KQL11054	Si006865m	30381780	30383957	0.20043	0.723045	0.277203
Chr2	Pgl_GLEAN_10020538	PgMYB66	236248342	236250458	Chr1	KQL28801	Si017191m	8156612	8159790	0.0415571	0.111802	0.371702
Chr2	Pgl_GLEAN_10020538	PgMYB66	236248342	236250458	Chr4	KQL12099	Si006354m	38758789	38762819	0.2626	1.3657	0.192282
Chr2	Pgl_GLEAN_10013105	PgMYB40	28088750	28091314	Chr9	KQK87961	Si036471m	10440762	10443753	0.0435889	0.0744313	0.585626
Chr2	Pgl_GLEAN_10009335	PgMYB41	28546397	28548210	Chr9	KQK87988	Si039882m	10628816	10630599	0.0696064	0.217067	0.320668
Chr2	Pgl_GLEAN_10013171	PgMYB33	3124453	3126666	Chr9	KQK86654	Si039046m	3143593	3145966	0.0432991	0.193282	0.22402
Chr2	Pgl_GLEAN_10031141	PgMYB42	36591916	36594448	Chr9	KQK88243	Si039629m	12506290	12507526	0.0319675	0.116551	0.27428
Chr2	Pgl_GLEAN_10021657	PgMYB43	43401652	43403095	Chr9	KQK88492	Si037244m	14614186	14615609	0.0667531	0.194853	0.342582
Chr2	Pgl_GLEAN_10004603	PgMYB44	47464253	47464684	Chr1	KQL30559	Si018182m	31683032	31684355	0.195965	0.376019	0.521157
Chr2	Pgl_GLEAN_10004603	PgMYB44	47464253	47464684	Chr9	KQK88719	Si040527m	16512985	16515304	0.0439534	0.117138	0.375227
Chr2	Pgl_GLEAN_10004603	PgMYB44	47464253	47464684	Chr7	KQK98099	Si010814m	24934266	24936514	0.199886	0.389531	0.513145
Chr2	Pgl_GLEAN_10032286	PgMYB45	49560523	49562884	Chr9	KQK88823	Si039992m	17427454	17429712	0.0559265	0.140763	0.397311
Chr2	Pgl_GLEAN_10011452	PgMYB46	53257854	53258328	Chr9	KQK88908	Si038928m	18435979	18436453	0.0528145	0.135647	0.389352
Chr2	Pgl_GLEAN_10021368	PgMYB48	68782565	68786613	Chr4	KQL08929	Si006883m	345261	349738	0.0609369	0.154747	0.393783
Chr2	Pgl_GLEAN_10022854	PgMYB34	8374146	8375336	Chr9	KQK86904	Si036681m	4382284	4383587	0.012315	0.115905	0.106251
Chr2	Pgl_GLEAN_10029006	PgMYB50	88036698	88038188	Chr4	KQL09549	Si007889m	4183861	4185379	0.0790046	0.275206	0.287074
Chr2	Pgl_GLEAN_10029495	PgMYB51	90670801	90676646	Chr4	KQL09496	Si006005m	3851372	3857969	0.0274852	0.113372	0.242434
Chr2	Pgl_GLEAN_10023193	PgMYB53	97683813	97684722	Chr4	KQL09883	Si008089m	7030829	7031749	0.0490392	0.199933	0.245278
Chr2	Pgl_GLEAN_10023203	PgMYB54	98076819	98078515	Chr4	KQL09876	Si008720m	6944860	6946264	0.0876836	0.263357	0.332946
Chr3	Pgl_GLEAN_10033508	PgMYB83	115449110	115449967	Chr4	KQL10921	Si006312m	28117057	28119313	0.182568	0.37075	0.492428
Chr3	Pgl_GLEAN_10012406	PgMYB72	13130719	13131887	Chr1	KQL31562	Si017785m	38418467	38419951	0.0132864	0.1043	0.127387
Chr3	Pgl_GLEAN_10003205	PgMYB84	148681995	148689668	Chr5	KQL03267	Si000349m	639445	646046	0.0382077	0.102167	0.373972
Chr3	Pgl_GLEAN_10012225	PgMYB73	16546883	16547771	Chr1	KQL31384	Si020225m	37213191	37214110	0.00719718	0.0830724	0.0866374
Chr3	Pgl_GLEAN_10012225	PgMYB73	16546883	16547771	Chr4	KQL10212	Si007017m	10929319	10930592	0.153162	0.492865	0.310758
Chr3	Pgl_GLEAN_10038634	PgMYB86	193927717	193932983	Chr7	KQK96799	Si009268m	15635082	15640198	0.0128663	0.105982	0.121401
Chr3	Pgl_GLEAN_10010553	PgMYB87	230874042	230876313	Chr1	KQL30198	Si017851m	28809834	28811736	0.239781	0.451602	0.530957
Chr3	Pgl_GLEAN_10010553	PgMYB87	230874042	230876313	Chr7	KQK97578	Si010352m	21987239	21989689	0.0301548	0.122617	0.245926
Chr3	Pgl_GLEAN_10012731	PgMYB89	238496740	238498133	Chr7	KQK97666	Si012130m	22506782	22507888	0.00778823	0.0970833	0.0802222
Chr3	Pgl_GLEAN_10018370	PgMYB90	253450474	253452242	Chr1	KQL30525	Si018007m	31454029	31455509	0.170133	0.786451	0.216329
Chr3	Pgl_GLEAN_10018370	PgMYB90	253450474	253452242	Chr7	KQK98018	Si010822m	24515109	24516992	0.0423177	0.0835122	0.506725
Chr3	Pgl_GLEAN_10035636	PgMYB91	256272527	256273940	Chr1	KQL30559	Si018182m	31683032	31684355	0.257538	0.631435	0.407861
Chr3	Pgl_GLEAN_10035636	PgMYB91	256272527	256273940	Chr7	KQK98099	Si010814m	24934266	24936514	0.0598063	0.144049	0.41518
Chr3	Pgl_GLEAN_10008203	PgMYB74	25676997	25678321	Chr1	KQL31045	Si017704m	35228686	35230396	0.0517621	0.14134	0.366225
Chr3	Pgl_GLEAN_10008203	PgMYB74	25676997	25678321	Chr7	KQK98711	Si010384m	28765122	28766441	0.312416	0.62422	0.50049
Chr3	Pgl_GLEAN_10003061	PgMYB92	260702446	260703687	Chr1	KQL30690	Si017934m	32638767	32640672	0.141757	0.314636	0.450542
Chr3	Pgl_GLEAN_10003063	PgMYB93	260772760	260774965	Chr1	KQL30688	Si017947m	32610378	32613051	0.176955	0.431639	0.409962
Chr3	Pgl_GLEAN_10027659	PgMYB75	27229177	27231397	Chr1	KQL30975	Si017289m	34794932	34797482	0.0482464	0.143372	0.336511
Chr3	Pgl_GLEAN_10027659	PgMYB75	27229177	27231397	Chr7	KQK98620	Si010077m	28305839	28308424	0.397672	1.99088	0.199746
Chr3	Pgl_GLEAN_10033575	PgMYB94	272420804	272422298	Chr7	KQK98353	Si012032m	26471534	26473019	0.0523148	0.160553	0.325842
Chr3	Pgl_GLEAN_10018049	PgMYB96	278678155	278681210	Chr1	KQL30898	Si019625m	34209133	34211780	0.388438	0.958221	0.405374
Chr3	Pgl_GLEAN_10018049	PgMYB96	278678155	278681210	Chr7	KQK98489	Si011884m	27375082	27378177	0.0423569	0.0760766	0.556767
Chr3	Pgl_GLEAN_10027682	PgMYB76	28080709	28084771	Chr1	KQL30944	Si017977m	34553125	34558207	0.0035896	0.0557532	0.0643837
Chr3	Pgl_GLEAN_10022511	PgMYB97	282395600	282397845	Chr1	KQL30975	Si017289m	34794932	34797482	0.37918	2.00102	0.189493
Chr3	Pgl_GLEAN_10022511	PgMYB97	282395600	282397845	Chr7	KQK98620	Si010077m	28305839	28308424	0.0498979	0.100065	0.498655
Chr3	Pgl_GLEAN_10023817	PgMYB99	285885710	285887095	Chr1	KQL31045	Si017704m	35228686	35230396	0.254051	0.652379	0.389422
Chr3	Pgl_GLEAN_10023817	PgMYB99	285885710	285887095	Chr7	KQK98711	Si010384m	28765122	28766441	0.0387053	0.158124	0.244778
Chr3	Pgl_GLEAN_10004210	PgMYB100	286573502	286575753	Chr1	KQL31100	Si018049m	35630672	35633425	0.195528	1.30995	0.149264
Chr3	Pgl_GLEAN_10004210	PgMYB100	286573502	286575753	Chr7	KQK98743	Si010794m	28946948	28949350	0.0444637	0.0908426	0.489458
Chr3	Pgl_GLEAN_10031924	PgMYB102	299679876	299682059	Chr3	KQL12945	Si022099m	1789225	1792053	0.0374254	0.0786893	0.47561
Chr3	Pgl_GLEAN_10031849	PgMYB103	300773715	300776344	Chr3	KQL12789	Si022762m	878677	882072	0.0441246	0.143114	0.308317
Chr3	Pgl_GLEAN_10002978	PgMYB69	3383904	3387612	Chr1	KQL31836	Si017415m	40004510	40007025	0.314815	0.580564	0.542258
Chr3	Pgl_GLEAN_10029306	PgMYB77	39068797	39070303	Chr1	KQL30690	Si017934m	32638767	32640672	0.0170774	0.103544	0.164929
Chr3	Pgl_GLEAN_10029303	PgMYB78	39139785	39142393	Chr1	KQL30688	Si017947m	32610378	32613051	0.0323098	0.140707	0.229624
Chr3	Pgl_GLEAN_10029303	PgMYB78	39139785	39142393	Chr7	KQK98241	Si012304m	25826474	25829553	0.190252	0.43512	0.437239
Chr3	Pgl_GLEAN_10008396	PgMYB79	41426566	41427520	Chr1	KQL30559	Si018182m	31683032	31684355	0.0229411	0.110382	0.207833
Chr3	Pgl_GLEAN_10027268	PgMYB80	47927271	47928520	Chr1	KQL30525	Si018007m	31454029	31455509	0.038475	0.0768521	0.500636
Chr3	Pgl_GLEAN_10027268	PgMYB80	47927271	47928520	Chr7	KQK98018	Si010822m	24515109	24516992	0.181679	0.65109	0.279038
Chr3	Pgl_GLEAN_10024409	PgMYB81	59460364	59462238	Chr1	KQL30198	Si017851m	28809834	28811736	0.036847	0.080365	0.458495
Chr3	Pgl_GLEAN_10024409	PgMYB81	59460364	59462238	Chr7	KQK97578	Si010352m	21987239	21989689	0.183813	0.453639	0.405197
Chr3	Pgl_GLEAN_10010695	PgMYB70	8058303	8060597	Chr1	KQL31100	Si018049m	35630672	35633425	0.00803974	0.164109	0.0489903
Chr3	Pgl_GLEAN_10010695	PgMYB70	8058303	8060597	Chr7	KQK98743	Si010794m	28946948	28949350	0.186739	1.19785	0.155895
Chr4	Pgl_GLEAN_10037578	PgMYB119	121139005	121140827	Chr8	KQK94341	Si026751m	13423855	13425764	0.0307035	0.109284	0.280952
Chr4	Pgl_GLEAN_10034301	PgMYB120	140810373	140811158	Chr2	KQL25487	Si030943m	38546914	38548167	0.145407	0.549405	0.264663
Chr4	Pgl_GLEAN_10034301	PgMYB120	140810373	140811158	Chr6	KQL02869	Si015081m	35040068	35040741	0.236227	0.986309	0.239506
Chr4	Pgl_GLEAN_10034291	PgMYB121	141183101	141185105	Chr2	KQL25449	Si030750m	38274052	38278815	0.0865381	0.191241	0.452508
Chr4	Pgl_GLEAN_10034291	PgMYB121	141183101	141185105	Chr6	KQL02853	Si015412m	34969699	34972072	0.0911941	0.14494	0.629187
Chr4	Pgl_GLEAN_10026254	PgMYB108	14946705	14957428	Chr3	KQL16588	Si022831m	42731226	42733181	0.0442502	0.138894	0.318589
Chr4	Pgl_GLEAN_10018451	PgMYB123	172584414	172590247	Chr8	KQK93885	Si026004m	5586521	5591857	0.23012	0.477301	0.482129
Chr4	Pgl_GLEAN_10033016	PgMYB124	175094529	175096819	Chr8	KQK93857	Si026734m	5239732	5241218	0.0436026	0.123186	0.353959
Chr4	Pgl_GLEAN_10030875	PgMYB111	55528138	55530117	Chr6	KQL00809	Si015546m	5225925	5227824	0.049016	0.150222	0.32629
Chr4	Pgl_GLEAN_10027372	PgMYB112	60096525	60098621	Chr6	KQL00840	Si013948m	5596458	5599488	0.573579	2.78229	0.206153
Chr4	Pgl_GLEAN_10027372	PgMYB112	60096525	60098621	Chr6	KQL00812	Si014031m	5231810	5236257	0.0322926	0.0842907	0.38311
Chr4	Pgl_GLEAN_10023931	PgMYB113	62891728	62901059	Chr6	KQL00733	Si013398m	4431691	4434134	0.0445973	0.210937	0.211425
Chr4	Pgl_GLEAN_10031352	PgMYB114	73303376	73304606	Chr6	KQL01183	Si015585m	10252733	10253854	0.00139486	0.108637	0.0128396
Chr5	Pgl_GLEAN_10001215	PgMYB135	100219849	100222160	Chr9	KQK89913	Si036696m	37082090	37084805	0.0373275	0.0841723	0.443465
Chr5	Pgl_GLEAN_10003870	PgMYB136	106827781	106829655	Chr9	KQK90136	Si039234m	40079362	40080196	0.338826	1.02312	0.331169
Chr5	Pgl_GLEAN_10003870	PgMYB136	106827781	106829655	Chr9	KQK92761	Si036127m	57144352	57148239	0.0762707	0.124986	0.610232
Chr5	Pgl_GLEAN_10034383	PgMYB137	115971950	115973798	Chr9	KQK90459	Si038905m	42812976	42814879	0.318546	0.607697	0.524185
Chr5	Pgl_GLEAN_10024859	PgMYB138	120455141	120456053	Chr2	KQL26790	Si030560m	46345633	46347337	0.0370169	0.119674	0.309313
Chr5	Pgl_GLEAN_10024859	PgMYB138	120455141	120456053	Chr9	KQK90656	Si038845m	44271964	44272926	0.145539	0.473692	0.307245
Chr5	Pgl_GLEAN_10024824	PgMYB139	121391288	121392666	Chr2	KQL26836	Si029872m	46549415	46551793	0.007587	0.0822115	0.0922863
Chr5	Pgl_GLEAN_10015206	PgMYB140	124674930	124676977	Chr2	KQL27224	Si030350m	48679214	48681473	0.0160121	0.121146	0.132172
Chr5	Pgl_GLEAN_10015206	PgMYB140	124674930	124676977	Chr9	KQK91070	Si036390m	47609412	47612115	0.35144	0.513039	0.685016
Chr5	Pgl_GLEAN_10026185	PgMYB141	126859479	126860936	Chr2	KQL27241	Si030584m	48783365	48785174	0.0198218	0.0990448	0.20013
Chr5	Pgl_GLEAN_10026185	PgMYB141	126859479	126860936	Chr9	KQK91141	Si035722m	48079021	48081464	0.022384	0.0822006	0.27231
Chr5	Pgl_GLEAN_10009674	PgMYB142	128477805	128481179	Chr9	KQK91043	Si035682m	47319175	47325089	0.0684807	0.143404	0.477537
Chr5	Pgl_GLEAN_10014494	PgMYB144	137252839	137253461	Chr9	KQK91660	Si038302m	51096264	51096730	0.0451044	0.174849	0.257962
Chr5	Pgl_GLEAN_10023408	PgMYB145	138360524	138367951	Chr9	KQK91743	Si038025m	51547729	51549659	0.0729724	0.101329	0.720153
Chr5	Pgl_GLEAN_10024234	PgMYB146	139121390	139122136	Chr9	KQK91778	Si039876m	51748963	51749661	0.0188138	0.100469	0.187259
Chr5	Pgl_GLEAN_10014410	PgMYB147	141218324	141222976	Chr9	KQK91883	Si034517m	52516645	52521250	0.0200933	0.0670959	0.299471
Chr5	Pgl_GLEAN_10009509	PgMYB148	153816437	153817649	Chr9	KQK92629	Si037281m	56482418	56483623	0.20098	1.20517	0.166766
Chr5	Pgl_GLEAN_10037679	PgMYB149	154904694	154907779	Chr9	KQK90136	Si039234m	40079362	40080196	0.173227	0.355369	0.487456
Chr5	Pgl_GLEAN_10037679	PgMYB149	154904694	154907779	Chr9	KQK92761	Si036127m	57144352	57148239	0.0846841	0.132563	0.638822
Chr5	Pgl_GLEAN_10009748	PgMYB126	33613428	33616783	Chr4	KQL11497	Si007070m	34222350	34227129	0.103396	0.342705	0.301705
Chr5	Pgl_GLEAN_10021337	PgMYB128	54588658	54589967	Chr4	KQL11395	Si007022m	33178902	33180211	0.178799	0.669611	0.267018
Chr5	Pgl_GLEAN_10007629	PgMYB129	69761871	69764398	Chr1	KQL28521	Si017608m	6423556	6425841	0.0197597	0.126205	0.156568
Chr5	Pgl_GLEAN_10007629	PgMYB129	69761871	69764398	Chr4	KQL11054	Si006865m	30381780	30383957	0.0227973	0.0962042	0.236968
Chr5	Pgl_GLEAN_10018726	PgMYB130	71218505	71224517	Chr4	KQL12048	Si006824m	38462959	38468310	0.020743	0.11355	0.182678
Chr5	Pgl_GLEAN_10018730	PgMYB131	71261073	71263189	Chr4	KQL12044	Si007179m	38432488	38435153	0.0263546	0.127855	0.206129
Chr5	Pgl_GLEAN_10026117	PgMYB132	74695424	74697000	Chr4	KQL11982	Si006555m	37970503	37972095	0.226077	1.43438	0.157613
Chr5	Pgl_GLEAN_10038507	PgMYB133	80929335	80931746	Chr1	KQL28801	Si017191m	8156612	8159790	0.029411	0.117336	0.250656
Chr5	Pgl_GLEAN_10038507	PgMYB133	80929335	80931746	Chr4	KQL12099	Si006354m	38758789	38762819	0.0530078	0.15036	0.352538
Chr5	Pgl_GLEAN_10021771	PgMYB134	99603046	99604465	Chr9	KQK89889	Si036966m	36755725	36757836	0.0497448	0.0964206	0.515914
Chr6	Pgl_GLEAN_10009833	PgMYB172	117624123	117627064	Chr5	KQL05669	Si002403m	26911796	26916978	0.0337325	0.137358	0.245581
Chr6	Pgl_GLEAN_10030436	PgMYB175	186179952	186180881	Chr5	KQL03506	Si002446m	2775770	2776720	0.0173448	0.0678428	0.255661
Chr6	Pgl_GLEAN_10010138	PgMYB177	190788488	190789969	Chr5	KQL03585	Si001565m	3298513	3300764	0.0800086	0.257775	0.310381
Chr6	Pgl_GLEAN_10014000	PgMYB178	199563038	199569338	Chr5	KQL03679	Si004691m	3951958	3953055	0.0236758	0.177513	0.133375
Chr6	Pgl_GLEAN_10010463	PgMYB154	21165723	21169107	Chr5	KQL08208	Si000815m	44184220	44188524	0.074662	0.217336	0.343533
Chr6	Pgl_GLEAN_10004547	PgMYB183	225667939	225669521	Chr5	KQL04478	Si002704m	9302393	9304214	0.0247776	0.145659	0.170106
Chr6	Pgl_GLEAN_10016246	PgMYB184	226495017	226497467	Chr5	KQL04518	Si002375m	9528001	9532718	0.105607	0.186339	0.566745
Chr6	Pgl_GLEAN_10028933	PgMYB185	227310821	227311711	Chr5	KQL04572	Si002595m	9949627	9950599	0.0329723	0.109213	0.301909
Chr6	Pgl_GLEAN_10024668	PgMYB187	231798060	231799103	Chr5	KQL04772	Si001941m	11573625	11577964	0.0351823	0.0858078	0.410013
Chr6	Pgl_GLEAN_10024645	PgMYB189	232325639	232327559	Chr3	KQL13888	Si022796m	7475790	7477479	0.104446	0.219064	0.476784
Chr6	Pgl_GLEAN_10024645	PgMYB189	232325639	232327559	Chr5	KQL04798	Si002353m	11877274	11879287	0.244746	0.375581	0.651645
Chr6	Pgl_GLEAN_10020208	PgMYB156	29277887	29278736	Chr3	KQL15286	Si023363m	18601149	18602240	0.0354309	0.0885548	0.400102
Chr6	Pgl_GLEAN_10020208	PgMYB156	29277887	29278736	Chr5	KQL07848	Si003047m	42134088	42135333	0.0959225	0.249448	0.38454
Chr6	Pgl_GLEAN_10020166	PgMYB157	30054880	30060540	Chr5	KQL07798	Si004755m	41828213	41831977	0.222264	0.406467	0.54682
Chr6	Pgl_GLEAN_10032441	PgMYB158	31625223	31626077	Chr3	KQL15244	Si022816m	18139961	18141577	0.0776945	0.158813	0.48922
Chr6	Pgl_GLEAN_10032441	PgMYB158	31625223	31626077	Chr5	KQL07779	Si002423m	41718403	41720139	0.0182835	0.0802905	0.227716
Chr6	Pgl_GLEAN_10032472	PgMYB159	32515311	32516764	Chr5	KQL07747	Si001686m	41539471	41541539	0.395885	0.877036	0.451389
Chr6	Pgl_GLEAN_10005529	PgMYB161	34150962	34156255	Chr3	KQL15175	Si021484m	17624623	17631481	0.0537656	0.165173	0.325511
Chr6	Pgl_GLEAN_10005529	PgMYB161	34150962	34156255	Chr5	KQL07671	Si000842m	41107145	41113718	0.0584531	0.163853	0.35674
Chr6	Pgl_GLEAN_10022172	PgMYB151	4151620	4152568	Chr5	KQL06039	Si003965m	30260958	30261873	0.41958	0.574965	0.729748
Chr6	Pgl_GLEAN_10022161	PgMYB152	4306302	4306577	Chr5	KQL06027	Si003521m	30190209	30191484	0.0203565	0.0639698	0.31822
Chr6	Pgl_GLEAN_10037254	PgMYB162	44081902	44084574	Chr5	KQL07415	Si000907m	39641837	39644520	0.0679503	0.170805	0.397824
Chr6	Pgl_GLEAN_10037339	PgMYB163	64792353	64793590	Chr5	KQL06776	Si004558m	35548407	35549890	0.034659	0.0985406	0.351724
Chr6	Pgl_GLEAN_10024574	PgMYB164	69960865	69962449	Chr5	KQL06657	Si002319m	34838234	34840217	0.065103	0.154532	0.421293
Chr6	Pgl_GLEAN_10012285	PgMYB165	70936081	70941636	Chr5	KQL06640	Si002467m	34779906	34785232	0.193703	0.363338	0.533121
Chr6	Pgl_GLEAN_10020860	PgMYB166	74057608	74058689	Chr3	KQL14525	Si022730m	11754514	11756057	0.0232402	0.110855	0.209644
Chr6	Pgl_GLEAN_10020860	PgMYB166	74057608	74058689	Chr5	KQL06598	Si005548m	34527324	34528934	0.107227	0.162676	0.659146
Chr6	Pgl_GLEAN_10036366	PgMYB167	76271038	76271964	Chr5	KQL06561	Si004316m	34211561	34212504	0.171835	0.416419	0.412648
Chr6	Pgl_GLEAN_10032520	PgMYB168	79346725	79347872	Chr3	KQL14432	Si022874m	11228871	11230412	0.209035	0.781813	0.267372
Chr6	Pgl_GLEAN_10023913	PgMYB169	87236926	87237192	Chr3	KQL14274	Si024486m	10055520	10056548	0.375698	2.30086	0.163286
Chr6	Pgl_GLEAN_10023913	PgMYB169	87236926	87237192	Chr5	KQL06028	Si002888m	30195427	30197554	0.0148888	0.125666	0.118479
Chr6	Pgl_GLEAN_10023913	PgMYB169	87236926	87237192	Chr5	KQL06270	Si003539m	32280434	32281892	0.111522	0.225656	0.494215
Chr6	Pgl_GLEAN_10022186	PgMYB170	88007335	88007812	Chr5	KQL06039	Si003965m	30260958	30261873	0.385688	0.41171	0.936794
Chr7	Pgl_GLEAN_10019884	PgMYB204	111509902	111516281	Chr2	KQL22398	Si032933m	2349927	2350298	0.035266	0.116809	0.301912
Chr7	Pgl_GLEAN_10021694	PgMYB205	118162049	118166438	Chr2	KQL23416	Si029945m	12208365	12213064	0.0588623	0.203629	0.289067
Chr7	Pgl_GLEAN_10016742	PgMYB206	120784959	120785738	Chr2	KQL24419	Si032498m	29895281	29896084	0.0403255	0.107627	0.374679
Chr7	Pgl_GLEAN_10001965	PgMYB191	135966	136955	Chr2	KQL27241	Si030584m	48783365	48785174	0.253121	0.469789	0.538797
Chr7	Pgl_GLEAN_10001965	PgMYB191	135966	136955	Chr9	KQK91141	Si035722m	48079021	48081464	0.0415033	0.116872	0.355116
Chr7	Pgl_GLEAN_10015781	PgMYB197	21036167	21038191	Chr2	KQL26229	Si030273m	43178814	43180348	0.0187053	0.095398	0.196076
Chr7	Pgl_GLEAN_10013916	PgMYB198	32400720	32402099	Chr2	KQL25856	Si030152m	40974148	40975501	0.0270085	0.144538	0.186861
Chr7	Pgl_GLEAN_10019811	PgMYB200	44995914	44999997	Chr2	KQL25449	Si030750m	38274052	38278815	0.281298	0.952047	0.295467
Chr7	Pgl_GLEAN_10019811	PgMYB200	44995914	44999997	Chr6	KQL02853	Si015412m	34969699	34972072	0.0226659	0.14537	0.155919
Chr7	Pgl_GLEAN_10015650	PgMYB193	6539265	6540649	Chr2	KQL26836	Si029872m	46549415	46551793	0.240758	0.521392	0.46176
Chr7	Pgl_GLEAN_10015650	PgMYB193	6539265	6540649	Chr9	KQK90732	Si036638m	45414003	45415801	0.137573	0.277199	0.496295
Chr7	Pgl_GLEAN_10029681	PgMYB202	68717409	68718324	Chr2	KQL23223	Si032172m	9858292	9859463	0.177267	0.445989	0.397469
Chr7	Pgl_GLEAN_10000710	PgMYB192	730454	732722	Chr9	KQK91070	Si036390m	47609412	47612115	0.0336134	0.0995867	0.337529
Chr7	Pgl_GLEAN_10013308	PgMYB195	7560160	7564132	Chr2	KQL26780	Si029124m	46292935	46297597	0.0336134	0.0995867	0.337529
