# Supplementary material for: Genome-Wide Identification and Transcriptional Analysis of the MYB Gene Family in Pearl Millet (Pennisetum glaucum)
Source: Int J Mol Sci. 2023 Jan 27;24(3):2484. doi: 10.3390/ijms24032484 (PMC9916650; doi:10.3390/ijms24032484)
Supplement: Supplementary file 1 [file ijms-24-02484-s001.zip › Table S7. Promoter analysis of PgMYB genes.xlsx]

## Sheet: Sheet1
Table S6. Promoter analysis of PgMYB genes
Gene ID	Methyl jasmonate (MeJA) response	Abscisic acid (ABA) response	Salicylic acid stress response	Drought stress	Low-temperature stress response	Gibberellin (GA) response			Auxin response		Anaerobic induction
	TGACG-motif	ABRE	TCA-element	MBS	LTR	GARE-motif	P-box	TATC-box	TGA-element	L-box	ARE
PgMYB1	3	0	1	2	0	1	0	0	1	0	2
PgMYB2*	2	5	2	1	0	0	1	0	0	0	2
PgMYB3*	5	8	0	0	4	0	0	0	0	0	0
PgMYB4	4	11	0	1	3	0	0	0	0	0	1
PgMYB6	0	2	0	1	2	0	1	0	1	0	5
PgMYB7*	3	4	0	4	1	0	2	0	2	0	0
PgMYB8	1	3	0	0	0	0	1	0	1	0	3
PgMYB9	3	1	1	0	0	0	0	0	0	0	2
PgMYB10	0	5	0	2	0	0	0	0	0	0	2
PgMYB11	2	2	0	2	0	1	0	0	0	0	1
PgMYB12	3	3	1	0	0	0	2	0	0	0	0
PgMYB13	0	3	0	1	1	0	0	0	0	0	1
PgMYB14	5	5	0	1	3	0	0	1	0	0	2
PgMYB15	1	1	0	0	0	1	2	1	0	0	1
PgMYB16	2	7	0	2	0	0	0	0	2	0	1
PgMYB18	1	2	1	0	1	1	1	0	0	0	3
PgMYB19	4	0	0	1	1	0	1	0	0	0	0
PgMYB20	0	2	0	1	1	0	0	1	1	0	4
PgMYB21	0	1	0	2	2	1	0	1	0	0	1
PgMYB22	4	3	0	6	0	2	2	0	0	0	2
PgMYB23	1	6	0	0	2	1	1	0	0	0	2
PgMYB24	1	1	0	1	1	0	1	0	0	0	2
PgMYB25	2	2	1	1	0	1	0	0	1	0	0
PgMYB26	3	0	1	0	0	0	0	0	2	0	1
PgMYB27	2	6	0	4	0	0	1	0	1	0	1
PgMYB28	5	0	1	0	2	0	1	0	1	0	1
PgMYB29	1	6	0	0	0	1	1	0	0	0	1
PgMYB30	0	2	0	0	0	0	0	0	0	0	1
PgMYB31	4	2	1	1	1	0	0	0	0	0	1
PgMYB32*	2	7	1	1	0	1	0	0	0	0	1
PgMYB33	0	2	1	1	3	0	1	0	2	0	1
PgMYB34	2	2	2	2	0	0	0	0	0	0	2
PgMYB36	0	1	3	1	1	0	1	0	2	0	3
PgMYB37*	0	1	0	4	0	2	0	0	0	0	6
PgMYB39	4	4	1	0	2	0	0	0	0	0	2
PgMYB40	1	2	0	1	2	0	0	0	0	0	4
PgMYB41	2	5	1	2	1	1	0	0	4	0	1
PgMYB42	4	3	0	0	3	1	2	0	0	0	1
PgMYB43	3	1	2	3	2	0	0	1	1	0	7
PgMYB44	7	3	0	0	0	0	0	0	5	0	3
PgMYB45	1	0	0	0	0	0	0	0	0	0	0
PgMYB46	1	1	1	1	1	0	0	0	0	0	1
PgMYB47	0	4	2	1	0	0	1	0	0	0	0
PgMYB48	1	0	0	0	0	0	0	0	0	0	2
PgMYB50	1	8	2	1	0	0	0	0	0	0	1
PgMYB51	1	2	2	5	0	0	0	0	0	0	0
PgMYB52	2	5	2	0	0	1	2	0	0	0	2
PgMYB53	1	10	0	0	0	1	0	0	3	0	0
PgMYB54	1	2	0	2	0	0	0	0	0	0	4
PgMYB55	2	4	1	3	0	1	0	0	0	0	3
PgMYB56	3	3	2	0	1	0	3	0	0	0	1
PgMYB57	6	4	1	1	0	0	1	0	2	0	0
PgMYB58	1	1	0	2	0	1	0	0	1	0	0
PgMYB59	2	0	3	1	1	0	0	0	0	0	0
PgMYB60	6	5	0	1	0	0	0	0	0	0	0
PgMYB61	2	3	0	0	1	0	1	1	2	0	4
PgMYB62	0	0	1	1	0	1	0	0	0	0	4
PgMYB63	2	4	1	1	0	1	0	0	0	1	3
PgMYB64	4	4	0	0	1	0	1	0	0	0	0
PgMYB65	2	1	0	1	1	0	0	0	2	0	2
PgMYB66	0	1	1	3	0	0	1	0	0	0	4
PgMYB68	0	0	0	3	0	0	0	0	1	0	2
PgMYB69	3	8	0	0	1	0	0	0	0	0	2
PgMYB70	1	8	0	0	1	0	0	0	1	0	2
PgMYB71	0	4	2	1	0	0	1	0	1	0	2
PgMYB72	4	8	0	3	0	0	0	0	1	0	1
PgMYB73	4	6	0	0	0	0	0	0	1	0	1
PgMYB74	2	6	0	2	0	0	0	0	2	0	1
PgMYB75	2	7	0	0	5	0	0	0	1	0	2
PgMYB76	3	5	0	1	0	0	0	0	0	0	0
PgMYB77	6	3	0	2	0	0	0	1	2	0	1
PgMYB78	6	3	1	1	0	0	1	0	0	0	0
PgMYB79*	3	4	0	1	1	0	0	0	0	0	0
PgMYB80	3	10	1	2	2	0	0	0	1	0	1
PgMYB81	5	7	1	1	0	0	0	0	2	0	0
PgMYB82	1	1	0	0	1	0	0	0	0	0	0
PgMYB83	3	4	0	3	0	0	0	0	0	0	1
PgMYB84	2	2	0	1	0	0	1	0	3	0	6
PgMYB85	4	3	1	0	0	0	0	0	3	0	2
PgMYB86	6	3	0	0	1	0	0	0	0	0	1
PgMYB87	2	4	0	1	1	0	1	0	0	0	2
PgMYB88	4	7	0	1	2	1	0	0	0	1	3
PgMYB89	4	5	0	0	0	0	0	1	1	0	0
PgMYB90	2	5	0	0	0	0	0	0	2	0	0
PgMYB91	2	4	0	0	0	2	0	0	1	1	2
PgMYB92	0	2	0	1	1	2	0	0	0	0	3
PgMYB93	3	3	1	0	0	0	0	0	0	1	0
PgMYB94	3	5	0	0	1	0	0	0	1	0	2
PgMYB95	0	8	0	1	0	0	0	0	0	0	1
PgMYB96	0	7	0	1	0	0	0	0	1	0	0
PgMYB97	1	5	0	0	4	0	1	0	0	0	0
PgMYB98	2	9	1	0	0	0	0	0	4	0	2
PgMYB99	2	4	1	0	0	0	1	1	0	0	1
PgMYB100	1	2	0	0	1	0	1	1	0	0	0
PgMYB101	1	0	1	2	0	0	0	0	3	0	5
PgMYB102	2	1	1	2	0	0	0	0	0	0	1
PgMYB102	1	3	0	3	1	0	0	1	0	0	0
PgMYB103	0	2	2	1	2	0	0	0	0	0	3
PgMYB104	0	0	0	0	0	0	1	0	0	0	2
PgMYB105	1	3	0	0	1	1	1	0	3	0	2
PgMYB107	0	1	0	1	0	0	2	0	1	0	2
PgMYB108*	1	6	0	0	1	0	0	0	1	0	1
PgMYB111	1	1	0	0	0	0	1	0	0	0	2
PgMYB112	2	1	3	1	1	0	0	0	1	0	0
PgMYB113	2	3	0	2	0	0	0	0	0	0	4
PgMYB114	4	3	0	2	0	0	0	1	0	0	5
PgMYB115	1	6	1	2	0	0	1	0	1	0	0
PgMYB116	2	0	0	3	0	2	0	0	0	0	4
PgMYB117	7	0	1	1	6	0	0	0	0	0	0
PgMYB119	1	4	0	1	0	0	2	0	0	0	2
PgMYB120	6	13	0	1	0	0	0	0	0	0	2
PgMYB121	1	0	0	0	0	1	1	0	0	0	2
PgMYB122	1	4	2	1	0	1	1	0	0	0	0
PgMYB123	7	6	0	0	0	0	0	0	1	0	2
PgMYB124	0	2	0	1	0	0	0	0	0	0	1
PgMYB125	3	3	0	2	0	0	2	0	0	0	2
PgMYB126	3	2	0	1	0	0	0	0	0	0	2
PgMYB128	1	0	0	0	0	1	0	0	0	0	1
PgMYB129	1	0	1	3	0	0	0	1	0	0	0
PgMYB130	1	0	0	1	1	0	1	0	0	0	2
PgMYB131	2	2	1	2	1	0	0	0	0	0	1
PgMYB132	4	7	0	0	1	0	0	0	0	0	0
PgMYB133	1	2	1	2	2	0	0	0	1	0	3
PgMYB134	2	11	1	0	1	0	2	0	2	0	2
PgMYB135	4	9	1	0	0	0	0	0	0	0	1
PgMYB136	1	2	0	0	0	0	0	0	0	0	2
PgMYB137	1	2	1	3	1	0	0	0	0	0	1
PgMYB138	4	0	0	1	0	0	0	0	0	0	1
PgMYB139	1	5	2	0	0	1	0	0	1	1	0
PgMYB140	2	0	1	4	0	0	2	0	0	0	3
PgMYB141	2	6	0	0	0	1	2	0	1	0	4
PgMYB142	2	2	1	0	1	0	0	0	2	0	1
PgMYB144	1	3	0	0	0	0	0	0	1	0	2
PgMYB145	2	4	1	0	1	0	1	1	1	0	0
PgMYB146	1	11	0	1	5	0	0	0	1	0	1
PgMYB147	2	3	3	0	1	0	1	0	0	0	1
PgMYB148	1	3	0	0	2	0	0	0	1	0	1
PgMYB149	1	4	0	2	1	1	3	0	0	0	1
PgMYB151	3	14	0	2	2	0	1	0	3	0	1
PgMYB152	1	1	3	3	0	0	0	0	0	0	1
PgMYB153	1	5	0	1	3	0	0	0	0	0	3
PgMYB154	3	5	0	0	0	1	0	0	1	0	0
PgMYB155	1	4	2	3	0	1	0	0	1	0	0
PgMYB156	2	6	0	0	1	0	0	0	0	0	1
PgMYB157	3	7	0	0	0	1	1	0	1	0	0
PgMYB158	3	8	0	1	0	1	0	0	1	0	1
PgMYB159*	5	8	0	0	1	1	1	0	0	0	0
PgMYB160	4	7	2	1	0	0	1	0	0	0	0
PgMYB161	5	5	1	0	2	1	0	0	0	0	0
PgMYB162	4	4	1	1	0	0	0	0	1	0	0
PgMYB163	4	2	0	2	2	0	0	0	2	0	0
PgMYB164	2	5	1	0	2	1	0	0	0	0	2
PgMYB165	7	2	0	1	2	0	0	2	0	0	2
PgMYB166	4	4	0	0	0	1	0	0	1	0	3
PgMYB167	2	3	0	1	1	0	0	0	2	0	0
PgMYB168	3	7	1	2	0	2	1	0	1	0	2
PgMYB169	1	0	1	2	0	0	2	0	0	0	2
PgMYB170	2	4	1	1	2	0	0	0	1	0	0
PgMYB171	4	7	0	1	1	1	0	0	2	0	0
PgMYB172	0	3	1	0	1	1	1	0	0	0	2
PgMYB173	5	5	0	2	0	0	1	0	1	0	2
PgMYB175	0	3	0	0	2	0	1	0	0	0	1
PgMYB176	3	4	0	0	0	0	1	0	1	0	0
PgMYB177	1	0	0	1	0	1	0	0	0	0	0
PgMYB178	3	7	0	1	0	1	0	0	1	0	3
PgMYB179	2	3	0	0	0	0	0	0	2	0	1
PgMYB180	3	2	1	0	0	0	1	0	2	0	2
PgMYB181	3	1	0	1	0	0	2	2	1	0	1
PgMYB182	1	1	0	2	1	0	0	0	1	0	1
PgMYB183	1	10	2	1	0	0	0	0	1	0	1
PgMYB184	3	0	0	1	0	0	0	0	0	0	2
PgMYB185	1	2	2	0	0	0	1	0	0	0	1
PgMYB186	4	8	1	0	0	0	0	0	0	0	1
PgMYB187	1	3	0	0	0	0	1	0	0	0	3
PgMYB189	1	3	1	3	0	0	1	0	0	0	0
PgMYB190	0	1	0	1	0	0	0	0	4	0	2
PgMYB191	2	9	0	1	0	0	1	0	1	0	4
PgMYB192	0	2	0	2	0	1	1	0	0	0	1
PgMYB193	0	4	0	1	0	0	0	0	1	0	0
PgMYB195	5	12	0	3	1	1	0	0	1	0	1
PgMYB196	4	3	0	1	1	0	0	0	1	0	5
PgMYB197*	0	2	0	0	4	0	0	0	1	0	0
PgMYB198	2	2	1	2	0	0	1	0	1	0	3
PgMYB199	1	0	1	1	0	0	0	0	0	0	3
PgMYB200	7	4	1	4	0	1	0	0	0	0	3
PgMYB201	2	1	0	1	0	0	0	0	0	0	1
PgMYB202	4	5	0	0	0	0	0	0	0	0	1
PgMYB203	1	6	0	1	0	0	1	0	0	0	4
PgMYB204	3	0	0	0	0	1	2	0	0	0	6
PgMYB205	1	4	1	0	0	0	0	0	0	0	1
PgMYB206	1	1	0	2	0	1	0	0	0	0	2
PgMYB207	1	5	0	2	1	1	1	1	0	0	1
PgMYB208	7	5	0	0	3	0	0	0	2	0	0
*was the genes selected for qPCR
	431	717	99
