# Supplementary material for: Genome-Wide Identification and Transcriptional Analysis of the MYB Gene Family in Pearl Millet (Pennisetum glaucum)
Source: Int J Mol Sci. 2023 Jan 27;24(3):2484. doi: 10.3390/ijms24032484 (PMC9916650; doi:10.3390/ijms24032484)
Supplement: Supplementary file 1 [file ijms-24-02484-s001.zip › Table S8. The primers used in RT-qPCR analysis.xlsx]

## Sheet: Sheet
Table S7. The primers used in RT-qPCR analysis
Gene ID	Gene Name	FORWARD PRIMERS (5'-3')	REVERSE PRIMERS (5'-3')
Pgl_GLEAN_10025141	PgMYB2	TCATCCTCGACCTCCACTC	CCGCCAGTAGTTCTTGATCTC
Pgl_GLEAN_10019982	PgMYB3	CACCTCAAGAAGAAGGTGAAGAG	CTGCTAGGAGGGCTATAGTAGTT
Pgl_GLEAN_10031720	PgMYB7	GCAACAGGTGGTCAAAGATTG	CCCATCTTCTTGAGCTTCTTCT
Pgl_GLEAN_10009918	PgMYB32	GTCCTTGCTAGGCAACAGAT	CTTGAGGTGAGTGTTCCAGTAG
Pgl_GLEAN_10002927	PgMYB37	CGGATGCGGATGTCTAACAA	CTTGGCGTTCCTAGGGTTATT
Pgl_GLEAN_10008396	PgMYB79	CGATTCTTTCGGGATGGAAATG	GCCTGCATGAACAGTTTGAG
Pgl_GLEAN_10026254	PgMYB108	TGGTTGCCAGCAGTTTCA	GATCTTCCAGATGTCCTCCAAG
Pgl_GLEAN_10030123	PgMYB143	CTGGACCCGATGCAGTTT	ACCAACCGCGTCCATAAA
Pgl_GLEAN_10032472	PgMYB159	GAACCTACCCAACAGGAAACA	GGAACCTCAGCAGCAAAGTA
Pgl_GLEAN_10022280	PgMYB174	GACAAGGTGGGACTGAAGAAG	CATTCTTGGGCAGCGATCT
Pgl_GLEAN_10015781	PgMYB197	GCAGCAACAACAACAACAATAAC	GGCGGAGTGGTGATTCAA
EF694165	EF-1α	AATGATCCGCTGCTGTAACAAG	AGGCAATCTTGTCTGGGTTGT
